# Supplementary material for: Hierarchical patterning modes orchestrate hair follicle morphogenesis
Source: PLoS Biol. 2017 Jul 11;15(7):e2002117. doi: 10.1371/journal.pbio.2002117 (PMC5507405; doi:10.1371/journal.pbio.2002117)
Supplement: S1 Data — (XLSX) [file pbio.2002117.s013.xlsx]

## Sheet: Fig 1D BMP4 treatment
Gene symbol			Tbp quantity (Copies)						GOI quantity (Copies)
			i	ii	iii	Mean			i	ii	iii	Mean	Relative expression (GOI/Tbp)		Mean (GOI/Tbp)	Fold change			T-test
Bmp2		Control 1	3414	3336	3446	3398.67		Control 1	2492	2500	2372	2454.67	0.722244	Control Mean	0.833523
		Control 2	3678	3447	3684	3603		Control 2	2161	2145	2447	2251	0.624757	Control S.E.M	0.0737624
		Control 3	3078	2739	2541	2786		Control 3	3145	3145	3067	3119	1.11953
		Control 4	2280	2151	2285	2238.67		Control 4	1552	1714	1616	1627.33	0.726921
		Control 5	2366	2172	2343	2293.67		Control 5	2138	2177	2220	2178.33	0.949717
		Control 6	2104	2111	2305	2173.33		Control 6	1929	1735	1930	1864.67	0.857975
		BMP4 1	2847	2713	2823	2794.33		BMP4 1	455.4	467.4	458.2	460.333	0.164738	BMP4 Mean	0.116878	-5.05969	FC Mean	-7.13156	2.96264e-06
		BMP4 2	3587	3340	3448	3458.33		BMP4 2	214.7	218.7	271.2	234.867	0.0679133	BMP4 S.E.M	0.0211425	-12.2734	FC S.E.M	1.5523
		BMP4 3	3573	3462	3630	3555		BMP4 3	221.2	226.9	259.7	235.933	0.0663666			-12.5594
		BMP4 4	2049	1839	1863	1917		BMP4 4	332.7	306.1	262.2	300.333	0.156668			-5.3203
		BMP4 5	2856	3074	2734	2888		BMP4 5	224.1	226.5	201.5	217.367	0.0752655			-11.0744
		BMP4 6	1410	1275	1287	1324		BMP4 6	214.4	248.6	213.5	225.5	0.170317			-4.89395
Bmp4			i	ii	iii	Mean			i	ii	iii	Mean	Relative expression (GOI/Tbp)		Mean (GOI/Tbp)	Fold change			T-test
		Control 1	3414	3336	3446	3398.67		Control 1	3052	2781	3021	2951.33	0.86838	Control Mean	0.957718
		Control 2	2280	2151	2285	2238.67		Control 2	1834	1762	1960	1852	0.827278	Control S.E.M	0.0690758
		Control 3	2366	2172	2343	2293.67		Control 3	2431	2398	2079	2302.67	1.00392
		Control 4	2104	2111	2305	2173.33		Control 4	2447	2495	2434	2458.67	1.13129
		Control 5						Control 5
		Control 6						Control 6
		BMP4 1	2847	2713	2823	2794.33		BMP4 1	1398	1364	1448	1403.33	0.502207	BMP4 Mean	0.345418	-1.90702	FC Mean	-2.77264	0.000108998
		BMP4 2	3587	3340	3448	3458.33		BMP4 2	1513	1330	1451	1431.33	0.41388	BMP4 S.E.M	0.054244	-2.314	FC S.E.M	0.707737
		BMP4 3	3573	3462	3630	3555		BMP4 3	1602	1585	1593	1593.33	0.448195			-2.13683
		BMP4 4	2049	1839	1863	1917		BMP4 4	445.9	577.7	517.9	513.833	0.26804			-3.57304
		BMP4 5	2856	3074	2734	2888		BMP4 5	441.8	396.2	425.2	421.067	0.145799			-6.56877
		BMP4 6	1410	1275	1287	1324		BMP4 6	414.5	323.2	431.6	389.767	0.294386			-3.25327
Rgma			i	ii	iii	Mean			i	ii	iii	Mean	Relative expression (GOI/Tbp)		Mean (GOI/Tbp)	Fold change			T-test
		Control 1	2280	2151	2285	2238.67		Control 1	1449	1342	1529	1440	0.64324	Control Mean	0.65699
		Control 2	2366	2172	2343	2293.67		Control 2	1823	1771	1823	1805.67	0.78724	Control S.E.M	0.0506016
		Control 3	2104	2111	2305	2173.33		Control 3	1159	1165	1200	1174.67	0.540491
		BMP4 1	2049	1839	1863	1917		BMP4 1	390.6	396.8	410.2	399.2	0.208242	BMP4 Mean	0.181499	-3.15494	FC Mean	-3.61981	0.00391139
		BMP4 2	2856	3074	2734	2888		BMP4 2	330.3	315.1	335.3	326.9	0.113193	BMP4 S.E.M	0.0243386	-5.80419	FC S.E.M	0.920009
		BMP4 3	1410	1275	1287	1324		BMP4 3	286.4	296.5	303.1	295.333	0.223061			-2.94533
Rgmb			i	ii	iii	Mean			i	ii	iii	Mean	Relative expression (GOI/Tbp)		Mean (GOI/Tbp)	Fold change			T-test
		Control 1	3414	3336	3446	3398.67		Control 1	1577	1411	1389	1459	0.429286	Control Mean	0.510278
		Control 2	2280	2151	2285	2238.67		Control 2	1107	1133	1142	1127.33	0.503574	Control S.E.M	0.0372832
		Control 3	2366	2172	2343	2293.67		Control 3	1379	1457	1361	1399	0.60994
		Control 4	2104	2111	2305	2173.33		Control 4	1061	1112	1076	1083	0.498313
		Control 5						Control 5
		Control 6						Control 6
		BMP4 1	2847	2713	2823	2794.33		BMP4 1	788.5	780.3	822.5	797.1	0.285256	BMP4 Mean	0.268343	-1.78884	FC Mean	-1.90159	0.000526317
		BMP4 2	3587	3340	3448	3458.33		BMP4 2	1094	1034	1039	1055.67	0.305253	BMP4 S.E.M	0.0254939	-1.67166	FC S.E.M	0.288621
		BMP4 3	3573	3462	3630	3555		BMP4 3	983.9	911.4	1010	968.433	0.272414			-1.87317
		BMP4 4	2049	1839	1863	1917		BMP4 4	523.3	538.8	519.7	527.267	0.275048			-1.85523
		BMP4 5	2856	3074	2734	2888		BMP4 5	399.9	443.6	433.9	425.8	0.147438			-3.46098
		BMP4 6	1410	1275	1287	1324		BMP4 6	403	464.5	422	429.833	0.324648			-1.57179
Bambi			i	ii	iii	Mean			i	ii	iii	Mean	Relative expression (GOI/Tbp)		Mean (GOI/Tbp)	Fold change			T-test
		Control 1	2280	2151	2285	2238.67		Control 1	3146	2982	2804	2977.33	1.32996	Control Mean	1.11843
		Control 2	2366	2172	2343	2293.67		Control 2	2488	2711	2823	2674	1.16582	Control S.E.M	0.0974807
		Control 3	2104	2111	2305	2173.33		Control 3	1904	1793	1907	1868	0.859509
		BMP4 1	2049	1839	1863	1917		BMP4 1	28910	31520	28920	29783.3	15.5364	BMP4 Mean	14.9255	13.8913	FC Mean	13.345	0.00573943
		BMP4 2	2856	3074	2734	2888		BMP4 2	27350	31160	30030	29513.3	10.2193	BMP4 S.E.M	1.80951	9.13719	FC S.E.M	2.28806
		BMP4 3	1410	1275	1287	1324		BMP4 3	23390	26270	25890	25183.3	19.0206			17.0066
Ctgf			i	ii	iii	Mean			i	ii	iii	Mean	Relative expression (GOI/Tbp)		Mean (GOI/Tbp)	Fold change			T-test
		Control 1	3414	3336	3446	3398.67		Control 1	1754	1655		1704.5	0.50152	Control Mean	0.841911
		Control 2	3678	3447	3684	3603		Control 2	2768	2845		2806.5	0.778934	Control S.E.M	0.102281
		Control 3	3078	2739	2541	2786		Control 3	2104	2480		2292	0.822685
		Control 4	2280	2151	2285	2238.67		Control 4	1444	1528	1626	1532.67	0.684634
		Control 5	2366	2172	2343	2293.67		Control 5	2678	2599	2647	2641.33	1.15158
		Control 6	2104	2111	2305	2173.33		Control 6	2328	2410	2513	2417	1.11212
		BMP4 1	2847	2713	2823	2794.33		BMP4 1	1037	1178		1107.5	0.396338	BMP4 Mean	0.586406	-2.12423	FC Mean	-1.43571	0.149822
		BMP4 2	3587	3340	3448	3458.33		BMP4 2	1264	1304		1284	0.371277	BMP4 S.E.M	0.127923	-2.26761	FC S.E.M	0.267156
		BMP4 3	3573	3462	3630	3555		BMP4 3	835	1792		1313.5	0.36948			-2.27864
		BMP4 4	2049	1839	1863	1917		BMP4 4	1315	1720	1373	1469.33	0.766475			-1.09842
		BMP4 5	2856	3074	2734	2888		BMP4 5	1411	1228	1410	1349.67	0.467336			-1.80151
		BMP4 6	1410	1275	1287	1324		BMP4 6	1311	1546	1701	1519.33	1.14753			-0.733671
Tsku			i	ii	iii	Mean			i	ii	iii	Mean	Relative expression (GOI/Tbp)		Mean (GOI/Tbp)	Fold change			T-test
		Control 1	3414	3336	3446	3398.67		Control 1	2968	2651	2764	2794.33	0.822185	Control Mean	0.718968
		Control 2	3678	3447	3684	3603		Control 2	1708	1789	2040	1845.67	0.512258	Control S.E.M	0.0475646
		Control 3	3078	2739	2541	2786		Control 3	2096	1806	1918	1940	0.696339
		Control 4	2280	2151	2285	2238.67		Control 4	1658	1638	1858	1718	0.767421
		Control 5	2366	2172	2343	2293.67		Control 5	1835	1901	1930	1888.67	0.823427
		Control 6	2104	2111	2305	2173.33		Control 6	1593	1423	1497	1504.33	0.692178
		BMP4 1	2847	2713	2823	2794.33		BMP4 1	1158	1173	1211	1180.67	0.422522	BMP4 Mean	0.479463	-1.70161	FC Mean	-1.49953	0.00413992
		BMP4 2	3587	3340	3448	3458.33		BMP4 2	1584	1472	1571	1542.33	0.445976	BMP4 S.E.M	0.0440249	-1.61212	FC S.E.M	0.135899
		BMP4 3	3573	3462	3630	3555		BMP4 3		1487	1560	1523.5	0.428551			-1.67767
		BMP4 4	2049	1839	1863	1917		BMP4 4	1103	1336	1134	1191	0.621283			-1.15723
		BMP4 5	2856	3074	2734	2888		BMP4 5	949	1042	1081	1024	0.354571			-2.02771
		BMP4 6	1410	1275	1287	1324		BMP4 6	764.7	766.9	867	799.533	0.603877			-1.19059
Nog			i	ii	iii	Mean			i	ii	iii	Mean	Relative expression (GOI/Tbp)		Mean (GOI/Tbp)	Fold change			T-test
		Control 1	2280	2151	2285	2238.67		Control 1	1086	1005	1318	1136.33	0.507594	Control Mean	0.561502
		Control 2	2366	2172	2343	2293.67		Control 2	1478	1366	1455	1433	0.624764	Control S.E.M	0.0241448
		Control 3	2104	2111	2305	2173.33		Control 3	1089	1096	1415	1200	0.552147
		BMP4 1	2049	1839	1863	1917		BMP4 1	24690	26720	25700	25703.3	13.4081	BMP4 Mean	10.2896	23.879	FC Mean	18.3252	0.00849557
		BMP4 2	2856	3074	2734	2888		BMP4 2	16650	20510	19300	18820	6.51662	BMP4 S.E.M	1.42562	11.6057	FC S.E.M	3.59061
		BMP4 3	1410	1275	1287	1324		BMP4 3	13430	14740	15300	14490	10.9441			19.4908
Fgf7			i	ii	iii	Mean			i	ii	iii	Mean	Relative expression (GOI/Tbp)		Mean (GOI/Tbp)	Fold change			T-test
		Control 1	2280	2151	2285	2238.67		Control 1	3041	2740	2605	2795.33	1.24866	Control Mean	1.42306
		Control 2	2366	2172	2343	2293.67		Control 2	3589	2906	2676	3057	1.3328	Control S.E.M	0.0951369
		Control 3	2104	2111	2305	2173.33		Control 3	4555	3081	3368	3668	1.68773
		BMP4 1	2049	1839	1863	1917		BMP4 1	2174	2229	1960	2121	1.10642	BMP4 Mean	0.891796	-1.28619	FC Mean	-1.59573	0.125126
		BMP4 2	2856	3074	2734	2888		BMP4 2	939.9	1597	1049	1195.3	0.413885	BMP4 S.E.M	0.169259	-3.43831	FC S.E.M	0.726572
		BMP4 3	1410	1275	1287	1324		BMP4 3	1601	1660	1327	1529.33	1.15509			-1.232
Fgf9			i	ii	iii	Mean			i	ii	iii	Mean	Relative expression (GOI/Tbp)		Mean (GOI/Tbp)	Fold change			T-test
		Control 1	2280	2151	2285	2238.67		Control 1	1971	1313	1890	1724.67	0.770399	Control Mean	1.10006
		Control 2	2366	2172	2343	2293.67		Control 2	3271	3610	3331	3404	1.48409	Control S.E.M	0.146943
		Control 3	2104	2111	2305	2173.33		Control 3	2829	2128	1861	2272.67	1.04571
		BMP4 1	2049	1839	1863	1917		BMP4 1	2916	2369	2001	2428.67	1.26691	BMP4 Mean	0.807687	-0.868304	FC Mean	-1.36199	0.423307
		BMP4 2	2856	3074	2734	2888		BMP4 2	1156	1451	772.3	1126.43	0.390039	BMP4 S.E.M	0.179593	-2.82039	FC S.E.M	0.579733
		BMP4 3	1410	1275	1287	1324		BMP4 3	1081	1068	894	1014.33	0.766113			-1.4359
Fgf10			i	ii	iii	Mean			i	ii	iii	Mean	Relative expression (GOI/Tbp)		Mean (GOI/Tbp)	Fold change			T-test
		Control 1	3414	3336	3446	3398.67		Control 1	3822		3670	3746	1.1022	Control Mean	0.903338
		Control 2	2280	2151	2285	2238.67		Control 2			1427	1427	0.637433	Control S.E.M	0.113202
		Control 3	2366	2172	2343	2293.67		Control 3	2009	1716	1733	1819.33	0.793199
		Control 4	2104	2111	2305	2173.33		Control 4	2256	2483	2306	2348.33	1.08052
		Control 5						Control 5
		Control 6						Control 6
		BMP4 1	2847	2713	2823	2794.33		BMP4 1	4171	4191	4177	4179.67	1.49577	BMP4 Mean	0.918897	1.65582	FC Mean	1.01722	0.942523
		BMP4 2	3587	3340	3448	3458.33		BMP4 2	4090	3969	3766	3941.67	1.13976	BMP4 S.E.M	0.151225	1.26172	FC S.E.M	0.167406
		BMP4 3	3573	3462	3630	3555		BMP4 3	3253	3365	3461	3359.67	0.945054			1.04618
		BMP4 4	2049	1839	1863	1917		BMP4 4	1639	1585	1517	1580.33	0.824378			0.912592
		BMP4 5	2856	3074	2734	2888		BMP4 5	964.2	1345	1451	1253.4	0.434003			0.480444
		BMP4 6	1410	1275	1287	1324		BMP4 6	791	836.8	1051	892.933	0.674421			0.746588
Fgf18			i	ii	iii	Mean			i	ii	iii	Mean	Relative expression (GOI/Tbp)		Mean (GOI/Tbp)	Fold change			T-test
		Control 1	2280	2151	2285	2238.67		Control 1	7646	6438	6430	6838	3.0545	Control Mean	3.71389
		Control 2	2366	2172	2343	2293.67		Control 2	11820	11960	12180	11986.7	5.22598	Control S.E.M	0.536059
		Control 3	2104	2111	2305	2173.33		Control 3	6456	5281	6918	6218.33	2.8612
		BMP4 1	2049	1839	1863	1917		BMP4 1	1667	1777	1565	1669.67	0.870979	BMP4 Mean	0.847338	-4.26404	FC Mean	-4.38301	0.0208446
		BMP4 2	2856	3074	2734	2888		BMP4 2	1993	1839	1009	1613.67	0.558749	BMP4 S.E.M	0.113299	-6.6468	FC S.E.M	0.985309
		BMP4 3	1410	1275	1287	1324		BMP4 3	1287	1564	1567	1472.67	1.11229			-3.33897
Fgf20			i	ii	iii	Mean			i	ii	iii	Mean	Relative expression (GOI/Tbp)		Mean (GOI/Tbp)	Fold change			T-test
		Control 1	3414	3336	3446	3398.67		Control 1	1600	1526	1694	1606.67	0.472734	Control Mean	0.974955
		Control 2	3678	3447	3684	3603		Control 2	2245	2030	2130	2135	0.592562	Control S.E.M	0.173965
		Control 3	3078	2739	2541	2786		Control 3	3473	3126	3024	3207.67	1.15135
		Control 4	2280	2151	2285	2238.67		Control 4	1973	2462	2239	2224.67	0.993746
		Control 5	2366	2172	2343	2293.67		Control 5	4088	3904	3474	3822	1.66633
		Control 6	2104	2111	2305	2173.33		Control 6	2114	2052	2178	2114.67	0.973006
		BMP4 1	2847	2713	2823	2794.33		BMP4 1	372	345.8	348.9	355.567	0.127246	BMP4 Mean	0.0403869	-7.66199	FC Mean	-24.1404	0.0003286
		BMP4 2	3587	3340	3448	3458.33		BMP4 2	18.54	21.78	15.4	18.5733	0.0053706	BMP4 S.E.M	0.019343	-181.535	FC S.E.M	33.957
		BMP4 3	3573	3462	3630	3555		BMP4 3	154.1	161.2	204.3	173.2	0.0487201			-20.0113
		BMP4 4	2049	1839	1863	1917		BMP4 4	12.85	11.09	17.06	13.6667	0.00712919			-136.755
		BMP4 5	2856	3074	2734	2888		BMP4 5	31.38	16.49	0	15.9567	0.00552516			-176.457
		BMP4 6	1410	1275	1287	1324		BMP4 6	50	53.9	88.07	63.99	0.0483308			-20.1725
Wnt5b			i	ii	iii	Mean			i	ii	iii	Mean	Relative expression (GOI/Tbp)		Mean (GOI/Tbp)	Fold change			T-test
		Control 1	3414	3336	3446	3398.67		Control 1	1800	1537	1506	1614.33	0.47499	Control Mean	0.915634
		Control 2	2280	2151	2285	2238.67		Control 2	2486	2241	3271	2666	1.19089	Control S.E.M	0.170597
		Control 3	2366	2172	2343	2293.67		Control 3	2444	2610	3062	2705.33	1.17948
		Control 4	2104	2111	2305	2173.33		Control 4	1783	1508	2037	1776	0.817178
		Control 5						Control 5
		Control 6						Control 6
		BMP4 1	2847	2713	2823	2794.33		BMP4 1	1489	1141	1399	1343	0.480616	BMP4 Mean	0.705913	-1.90513	FC Mean	-1.29709	0.348862
		BMP4 2	3587	3340	3448	3458.33		BMP4 2	1820	1769	1619	1736	0.501976	BMP4 S.E.M	0.129575	-1.82406	FC S.E.M	0.203221
		BMP4 3	3573	3462	3630	3555		BMP4 3	1879	1717	1767	1787.67	0.50286			-1.82085
		BMP4 4	2049	1839	1863	1917		BMP4 4	1887	1306	2138	1777	0.926969			-0.987772
		BMP4 5	2856	3074	2734	2888		BMP4 5	1792	1587	1538	1639	0.567521			-1.61339
		BMP4 6	1410	1275	1287	1324		BMP4 6	1592	1910	1485	1662.33	1.25554			-0.729276
Wnt9a			i	ii	iii	Mean			i	ii	iii	Mean	Relative expression (GOI/Tbp)		Mean (GOI/Tbp)	Fold change			T-test
		Control 1	3414	3336	3446	3398.67		Control 1	944.3	1590	1668	1400.77	0.412152	Control Mean	1.18451
		Control 2	2280	2151	2285	2238.67		Control 2	2200	2049	1622	1957	0.874181	Control S.E.M	0.338477
		Control 3	2366	2172	2343	2293.67		Control 3	3463	3679	3227	3456.33	1.5069
		Control 4	2104	2111	2305	2173.33		Control 4	4619	3963	4098	4226.67	1.94479
		Control 5						Control 5
		Control 6						Control 6
		BMP4 1	2847	2713	2823	2794.33		BMP4 1	1648	1769	1862	1759.67	0.629727	BMP4 Mean	1.25165	0.531637	FC Mean	1.05669	0.904494
		BMP4 2	3587	3340	3448	3458.33		BMP4 2	1632	1823	1574	1676.33	0.484723	BMP4 S.E.M	0.37723	0.40922	FC S.E.M	0.31847
		BMP4 3	3573	3462	3630	3555		BMP4 3	2032	2152	2036	2073.33	0.583216			0.492371
		BMP4 4	2049	1839	1863	1917		BMP4 4	4481	3007	3556	3681.33	1.92036			1.62124
		BMP4 5	2856	3074	2734	2888		BMP4 5	2568	3492	3458	3172.67	1.09857			0.927449
		BMP4 6	1410	1275	1287	1324		BMP4 6	3649	4218	3228	3698.33	2.7933			2.3582
Fzd1			i	ii	iii	Mean			i	ii	iii	Mean	Relative expression (GOI/Tbp)		Mean (GOI/Tbp)	Fold change			T-test
		Control 1	2280	2151	2285	2238.67		Control 1	988.1	1154	1224	1122.03	0.501206	Control Mean	0.562819
		Control 2	2366	2172	2343	2293.67		Control 2	1404	1460	1427	1430.33	0.623601	Control S.E.M	0.0249855
		Control 3	2104	2111	2305	2173.33		Control 3	1246	1140	1289	1225	0.56365
		BMP4 1	2049	1839	1863	1917		BMP4 1	1799	1980	1920	1899.67	0.990958	BMP4 Mean	0.891113	1.7607	FC Mean	1.5833	0.150317
		BMP4 2	2856	3074	2734	2888		BMP4 2	1521	1551	1599	1557	0.539127	BMP4 S.E.M	0.12827	0.957905	FC S.E.M	0.322307
		BMP4 3	1410	1275	1287	1324		BMP4 3	1459	1567	1515	1513.67	1.14325			2.0313
Fzd2			i	ii	iii	Mean			i	ii	iii	Mean	Relative expression (GOI/Tbp)		Mean (GOI/Tbp)	Fold change			T-test
		Control 1	2280	2151	2285	2238.67		Control 1	2215	2634	2841	2563.33	1.14503	Control Mean	1.42639
		Control 2	2366	2172	2343	2293.67		Control 2	3762	3926	4062	3916.67	1.7076	Control S.E.M	0.114835
		Control 3	2104	2111	2305	2173.33		Control 3	2880	3183	3238	3100.33	1.42653
		BMP4 1	2049	1839	1863	1917		BMP4 1	2409	2808	2400	2539	1.32447	BMP4 Mean	1.18187	-1.07695	FC Mean	-1.20689	0.455919
		BMP4 2	2856	3074	2734	2888		BMP4 2	1909	1996	2151	2018.67	0.698984	BMP4 S.E.M	0.175429	-2.04066	FC S.E.M	0.346904
		BMP4 3	1410	1275	1287	1324		BMP4 3	1881	2075	2090	2015.33	1.52216			-0.937084
Fzd4			i	ii	iii	Mean			i	ii	iii	Mean	Relative expression (GOI/Tbp)		Mean (GOI/Tbp)	Fold change			T-test
		Control 1	2280	2151	2285	2238.67		Control 1	2002	1678	2134	1938	0.865694	Control Mean	1.01675
		Control 2	2366	2172	2343	2293.67		Control 2	2279	2624	2296	2399.67	1.04621	Control S.E.M	0.0566209
		Control 3	2104	2111	2305	2173.33		Control 3	2443	2497	2482	2474	1.13834
		BMP4 1	2049	1839	1863	1917		BMP4 1	2264	2386	2254	2301.33	1.20049	BMP4 Mean	0.898425	-0.846948	FC Mean	-1.1317	0.64079
		BMP4 2	2856	3074	2734	2888		BMP4 2	1210	1521	1329	1353.33	0.468606	BMP4 S.E.M	0.156074	-2.16974	FC S.E.M	0.419016
		BMP4 3	1410	1275	1287	1324		BMP4 3	1166	1484	1426	1358.67	1.02618			-0.990808
Fzd7			i	ii	iii	Mean			i	ii	iii	Mean	Relative expression (GOI/Tbp)		Mean (GOI/Tbp)	Fold change			T-test
		Control 1	1590	1565	1623	1592.67		Control 1	1637	1619	1601	1619	1.01653	Control Mean	1.24324
		Control 2	2134	2032	2085	2083.67		Control 2	2065	1950	2092	2035.67	0.976964	Control S.E.M	0.139592
		Control 3	1807	1652	2199	1886		Control 3	2242	1985	2002	2076.33	1.10092
		Control 4	2280	2151	2285	2238.67		Control 4	2345	2348	2697	2463.33	1.10036
		Control 5	2366	2172	2343	2293.67		Control 5	3622	2808	3125	3185	1.38861
		Control 6	2104	2111	2305	2173.33		Control 6	4096	4187	3949	4077.33	1.87607
		BMP4 1	2640	2636	2666	2647.33		BMP4 1	3736	3464	3492	3564	1.34626	BMP4 Mean	2.17924	1.08286	FC Mean	1.75286	0.0941118
		BMP4 2	1829	1719	1941	1829.67		BMP4 2	3232	3091	2967	3096.67	1.69248	BMP4 S.E.M	0.486427	1.36134	FC S.E.M	0.391257
		BMP4 3	2291	2185	2368	2281.33		BMP4 3	3142	2838	2818	2932.67	1.28551			1.03399
		BMP4 4	2049	1839	1863	1917		BMP4 4	7441	7494	7635	7523.33	3.92453			3.15669
		BMP4 5	2856	3074	2734	2888		BMP4 5	3888	3961	3946	3931.67	1.36138			1.09502
		BMP4 6	1410	1275	1287	1324		BMP4 6	4417	4513	4834	4588	3.46526			2.78727
Fzd8			i	ii	iii	Mean			i	ii	iii	Mean	Relative expression (GOI/Tbp)		Mean (GOI/Tbp)	Fold change			T-test
		Control 1	2280	2151	2285	2238.67		Control 1	2308	2442	2704	2484.67	1.10989	Control Mean	1.08389
		Control 2	2366	2172	2343	2293.67		Control 2	2806	2843	2862	2837	1.23688	Control S.E.M	0.0683847
		Control 3	2104	2111	2305	2173.33		Control 3	2114	1804	1982	1966.67	0.904908
		BMP4 1	2049	1839	1863	1917		BMP4 1	1753	1729	1928	1803.33	0.940706	BMP4 Mean	0.817303	-1.15221	FC Mean	-1.32618	0.228238
		BMP4 2	2856	3074	2734	2888		BMP4 2	1343	1530	1447	1440	0.498615	BMP4 S.E.M	0.113625	-2.17381	FC S.E.M	0.35495
		BMP4 3	1410	1275	1287	1324		BMP4 3	1143	1544	1335	1340.67	1.01259			-1.07042
Fzd10			i	ii	iii	Mean			i	ii	iii	Mean	Relative expression (GOI/Tbp)		Mean (GOI/Tbp)	Fold change			T-test
		Control 1	3414	3336	3446	3398.67		Control 1	647.3	830.4	847.9	775.2	0.228089	Control Mean	0.639904
		Control 2	3678	3447	3684	3603		Control 2	1297	1438	1476	1403.67	0.389583	Control S.E.M	0.130975
		Control 3	3078	2739	2541	2786		Control 3	1580	1221	1301	1367.33	0.490787
		Control 4	2280	2151	2285	2238.67		Control 4	1599	1749	1782	1710	0.763848
		Control 5	2366	2172	2343	2293.67		Control 5	2003	2203	2111	2105.67	0.918035
		Control 6	2104	2111	2305	2173.33		Control 6	2165	2307	2368	2280	1.04908
		BMP4 1	2847	2713	2823	2794.33		BMP4 1	259.2	263	286.5	269.567	0.096469	BMP4 Mean	0.142055	-6.63325	FC Mean	-4.50462	0.0044444
		BMP4 2	3587	3340	3448	3458.33		BMP4 2	216.8	256.4	259	244.067	0.0705735	BMP4 S.E.M	0.0377491	-9.0672	FC S.E.M	1.27431
		BMP4 3	3573	3462	3630	3555		BMP4 3	197.9	246.5	251.6	232	0.0652602			-9.80542
		BMP4 4	2049	1839	1863	1917		BMP4 4	548.8	552.6	538.7	546.7	0.285185			-2.24382
		BMP4 5	2856	3074	2734	2888		BMP4 5	275	313.1	318.2	302.1	0.104605			-6.11732
		BMP4 6	1410	1275	1287	1324		BMP4 6	285.9	321.9	306.7	304.833	0.230237			-2.77933
Ror1			i	ii	iii	Mean			i	ii	iii	Mean	Relative expression (GOI/Tbp)		Mean (GOI/Tbp)	Fold change			T-test
		Control 1	2280	2151	2285	2238.67		Control 1	13920	10550	11930	12133.3	5.41989	Control Mean	5.29957
		Control 2	2366	2172	2343	2293.67		Control 2	12080	11080	11210	11456.7	4.99491	Control S.E.M	0.108501
		Control 3	2104	2111	2305	2173.33		Control 3	13780	12050	9925	11918.3	5.4839
		BMP4 1	2049	1839	1863	1917		BMP4 1	5159	5332	4553	5014.67	2.61589	BMP4 Mean	3.21961	-2.02591	FC Mean	-1.64603	0.00776731
		BMP4 2	2856	3074	2734	2888		BMP4 2	7873	7101	11800	8924.67	3.09026	BMP4 S.E.M	0.276674	-1.71493	FC S.E.M	0.198067
		BMP4 3	1410	1275	1287	1324		BMP4 3	4688	5513	5499	5233.33	3.95267			-1.34076
Ror2			i	ii	iii	Mean			i	ii	iii	Mean	Relative expression (GOI/Tbp)		Mean (GOI/Tbp)	Fold change			T-test
		Control 1	2280	2151	2285	2238.67		Control 1	2473	2695	2540	2569.33	1.14771	Control Mean	1.57432
		Control 2	2366	2172	2343	2293.67		Control 2	3818	3631	4033	3827.33	1.66865	Control S.E.M	0.158457
		Control 3	2104	2111	2305	2173.33		Control 3	3979	4179	4273	4143.67	1.9066
		BMP4 1	2049	1839	1863	1917		BMP4 1	4744	4648	4572	4654.67	2.4281	BMP4 Mean	1.82391	1.54232	FC Mean	1.15854	0.643674
		BMP4 2	2856	3074	2734	2888		BMP4 2	2351	2734	3163	2749.33	0.951985	BMP4 S.E.M	0.315829	0.604697	FC S.E.M	0.28371
		BMP4 3	1410	1275	1287	1324		BMP4 3	2684	2854	2770	2769.33	2.09164			1.3286
Dkk1			i	ii	iii	Mean			i	ii	iii	Mean	Relative expression (GOI/Tbp)		Mean (GOI/Tbp)	Fold change			T-test
		Control 1	3414	3336	3446	3398.67		Control 1	3289	2901	2806	2998.67	0.882307	Control Mean	0.832015
		Control 2	3678	3447	3684	3603		Control 2	2737	2968	3019	2908	0.807105	Control S.E.M	0.106819
		Control 3	3078	2739	2541	2786		Control 3	1646	1543	1370	1519.67	0.545465
		Control 4	2280	2151	2285	2238.67		Control 4	1104	1202	1240	1182	0.527993
		Control 5	2366	2172	2343	2293.67		Control 5	2405	2324	2600	2443	1.06511
		Control 6	2104	2111	2305	2173.33		Control 6	2907	2228	2455	2530	1.16411
		BMP4 1	2847	2713	2823	2794.33		BMP4 1	4017	4377	3555	3983	1.42538	BMP4 Mean	2.14592	1.71317	FC Mean	2.57919	0.00927424
		BMP4 2	3587	3340	3448	3458.33		BMP4 2	5671	5295	5444	5470	1.58169	BMP4 S.E.M	0.394649	1.90103	FC S.E.M	0.474329
		BMP4 3	3573	3462	3630	3555		BMP4 3	5735	5745	5469	5649.67	1.58922			1.91008
		BMP4 4	2049	1839	1863	1917		BMP4 4	6962	7512	7240	7238	3.77569			4.53801
		BMP4 5	2856	3074	2734	2888		BMP4 5	4326	4683	4864	4624.33	1.60122			1.92451
		BMP4 6	1410	1275	1287	1324		BMP4 6	3672	4113	3743	3842.67	2.90232			3.4883
Dkk4			i	ii	iii	Mean			i	ii	iii	Mean	Relative expression (GOI/Tbp)		Mean (GOI/Tbp)	Fold change			T-test
		Control 1	3414	3336	3446	3398.67		Control 1	1041	978	1039	1019.33	0.299922	Control Mean	1.19742
		Control 2	3678	3447	3684	3603		Control 2	1084	1023	1070	1059	0.293922	Control S.E.M	0.448713
		Control 3	3078	2739	2541	2786		Control 3	1522	1566	1463	1517	0.544508
		Control 4	2280	2151	2285	2238.67		Control 4	2649	2530	2634	2604.33	1.16334
		Control 5	2366	2172	2343	2293.67		Control 5	7205	6886	7314	7135	3.11074
		Control 6	2104	2111	2305	2173.33		Control 6	4351	3570	3633	3851.33	1.77209
		BMP4 1	2847	2713	2823	2794.33		BMP4 1	57.46	57.56	57.94	57.6533	0.0206322	BMP4 Mean	0.00493113	-58.0364	FC Mean	-242.829	0.0240021
		BMP4 2	3587	3340	3448	3458.33		BMP4 2	0.09943	0.2112	0.06376	0.124797	3.60858e-05	BMP4 S.E.M	0.00339394	-33182.6	FC S.E.M	5915.49
		BMP4 3	3573	3462	3630	3555		BMP4 3	27.82	29.79	28.58	28.73	0.00808158			-148.167
		BMP4 4	2049	1839	1863	1917		BMP4 4	0.7315	0	0	0.243833	0.000127195			-9414.03
		BMP4 5	2856	3074	2734	2888		BMP4 5	0	0	0.3929	0.130967	4.53486e-05			-26404.8
		BMP4 6	1410	1275	1287	1324		BMP4 6	1.68	0	0.9588	0.8796	0.00066435			-1802.39

## Sheet: Fig 1D LDN treatment
Gene symbol			Tbp quantity (Copies)						GOI quantity (Copies)
			i	ii	iii	Mean			i	ii	iii	Mean	Relative expression (GOI/Tbp)		Mean (GOI/Tbp)	Fold change			T-test
Bmp2		Control 1	3171	2973	2814	2986		Control 1	1599	1848	1620	1689	0.56564	Control Mean	0.551261
		Control 2	2603	2307	2446	2452		Control 2	1194	1308	1384	1295.33	0.528276	Control S.E.M	0.0116126
		Control 3	2209	2157	2282	2216		Control 3	1226	1267	1229	1240.67	0.559868
		LDN 1	2467	2698	2647	2604		LDN 1	1848	1766	1798	1804	0.69278	LDN Mean	0.634522	1.25672	FC Mean	1.15104	0.0571163
		LDN 2	2624	2648	2622	2631.33		LDN 2	1624	1653	1534	1603.67	0.60945	LDN S.E.M	0.0292232	1.10556	FC S.E.M	0.0530116
		LDN 3	2608	2538	2492	2546		LDN 3	1576	1571	1446	1531	0.601335			1.09084
Bmp4			i	ii	iii	Mean			i	ii	iii	Mean	Relative expression (GOI/Tbp)		Mean (GOI/Tbp)	Fold change			T-test
		Control 1	3171	2973	2814	2986		Control 1	2221	2307	2056	2194.67	0.734985	Control Mean	0.727917
		Control 2	2603	2307	2446	2452		Control 2	1576	1608	1612	1598.67	0.651985	Control S.E.M	0.0419482
		Control 3	2209	2157	2282	2216		Control 3	1732	1676	1889	1765.67	0.796781
		LDN 1	2467	2698	2647	2604		LDN 1	5386	5198	5495	5359.67	2.05824	LDN Mean	1.67016	2.82758	FC Mean	2.29444	0.0250168
		LDN 2	2624	2648	2622	2631.33		LDN 2	4838	4621	4688	4715.67	1.79212	LDN S.E.M	0.266341	2.46198	FC S.E.M	0.365894
		LDN 3	2608	2538	2492	2546		LDN 3	3005	3076	2780	2953.67	1.16012			1.59375
Rgma			i	ii	iii	Mean			i	ii	iii	Mean	Relative expression (GOI/Tbp)		Mean (GOI/Tbp)	Fold change			T-test
		Control 1	3171	2973	2814	2986		Control 1	1643	1702	1750	1698.33	0.568765	Control Mean	0.507504
		Control 2	2603	2307	2446	2452		Control 2	1077	1129	1155	1120.33	0.456906	Control S.E.M	0.0327282
		Control 3	2209	2157	2282	2216		Control 3	1109	1088	1106	1101	0.496841
		LDN 1	2467	2698	2647	2604		LDN 1	1348	1379	1366	1364.33	0.523938	LDN Mean	0.530596	1.03238	FC Mean	1.0455	0.682058
		LDN 2	2624	2648	2622	2631.33		LDN 2	1527	1633	1612	1590.67	0.60451	LDN S.E.M	0.0408876	1.19114	FC S.E.M	0.0805661
		LDN 3	2608	2538	2492	2546		LDN 3	1146	1210	1183	1179.67	0.463341			0.91298
Rgmb			i	ii	iii	Mean			i	ii	iii	Mean	Relative expression (GOI/Tbp)		Mean (GOI/Tbp)	Fold change			T-test
		Control 1	3171	2973	2814	2986		Control 1	1368	1477	1471	1438.67	0.481804	Control Mean	0.460128
		Control 2	2603	2307	2446	2452		Control 2	1147	1116	1084	1115.67	0.455003	Control S.E.M	0.0113288
		Control 3	2209	2157	2282	2216		Control 3	1006	930.9	1012	982.967	0.443577
		LDN 1	2467	2698	2647	2604		LDN 1	960.5	979.8	952.6	964.3	0.370315	LDN Mean	0.350368	-1.24253	FC Mean	-1.31327	0.0125036
		LDN 2	2624	2648	2622	2631.33		LDN 2	980	978.1	1009	989.033	0.375868	LDN S.E.M	0.0227793	-1.22418	FC S.E.M	0.0920344
		LDN 3	2608	2538	2492	2546		LDN 3	795	724.1	809.9	776.333	0.304923			-1.509
Bambi			i	ii	iii	Mean			i	ii	iii	Mean	Relative expression (GOI/Tbp)		Mean (GOI/Tbp)	Fold change			T-test
		Control 1	3171	2973	2814	2986		Control 1	2088	2564	2547	2399.67	0.803639	Control Mean	0.786106
		Control 2	2603	2307	2446	2452		Control 2	1979	2040	2168	2062.33	0.841082	Control S.E.M	0.0378312
		Control 3	2209	2157	2282	2216		Control 3	1549	1598	1597	1581.33	0.713598
		LDN 1	2467	2698	2647	2604		LDN 1	1492	1352	1385	1409.67	0.541347	LDN Mean	0.622334	-1.45213	FC Mean	-1.26316	0.0453694
		LDN 2	2624	2648	2622	2631.33		LDN 2	1920	1758	1738	1805.33	0.686091	LDN S.E.M	0.042663	-1.14578	FC S.E.M	0.0914488
		LDN 3	2608	2538	2492	2546		LDN 3	1489	1814	1582	1628.33	0.639565			-1.22913
Ctgf			i	ii	iii	Mean			i	ii	iii	Mean	Relative expression (GOI/Tbp)		Mean (GOI/Tbp)	Fold change			T-test
		Control 1	3171	2973	2814	2986		Control 1	1645	1573	1939	1719	0.575687	Control Mean	0.608561
		Control 2	2603	2307	2446	2452		Control 2	1317	1561	1486	1454.67	0.593257	Control S.E.M	0.0246172
		Control 3	2209	2157	2282	2216		Control 3	1384	1405	1577	1455.33	0.656739
		LDN 1	2467	2698	2647	2604		LDN 1	4320	4177	4277	4258	1.63518	LDN Mean	1.47595	2.68696	FC Mean	2.42531	0.00790332
		LDN 2	2624	2648	2622	2631.33		LDN 2	3106	3065	2730	2967	1.12757	LDN S.E.M	0.174404	1.85284	FC S.E.M	0.286585
		LDN 3	2608	2538	2492	2546		LDN 3	4495	4048	4175	4239.33	1.6651			2.73612
Tsku			i	ii	iii	Mean			i	ii	iii	Mean	Relative expression (GOI/Tbp)		Mean (GOI/Tbp)	Fold change			T-test
		Control 1	3171	2973	2814	2986		Control 1	1813	2229	2223	2088.33	0.699375	Control Mean	0.626456
		Control 2	2603	2307	2446	2452		Control 2	1387	1334	1543	1421.33	0.579663	Control S.E.M	0.0369443
		Control 3	2209	2157	2282	2216		Control 3	1355	1246	1390	1330.33	0.600331
		LDN 1	2467	2698	2647	2604		LDN 1	1392	1498	1543	1477.67	0.56746	LDN Mean	0.593252	-1.10396	FC Mean	-1.05597	0.506174
		LDN 2	2624	2648	2622	2631.33		LDN 2	1587	1757	1759	1701	0.64644	LDN S.E.M	0.0265983	-0.969086	FC S.E.M	0.0454906
		LDN 3	2608	2538	2492	2546		LDN 3	1421	1474	1427	1440.67	0.565855			-1.1071
Nog			i	ii	iii	Mean			i	ii	iii	Mean	Relative expression (GOI/Tbp)		Mean (GOI/Tbp)	Fold change			T-test
		Control 1	3171	2973	2814	2986		Control 1	1519	1874	1463	1618.67	0.542085	Control Mean	0.560062
		Control 2	2603	2307	2446	2452		Control 2	1568	1531	1482	1527	0.622757	Control S.E.M	0.0322842
		Control 3	2209	2157	2282	2216		Control 3	1079	1225	1122	1142	0.515343
		LDN 1	2467	2698	2647	2604		LDN 1	185.8	144.2	110	146.667	0.0563236	LDN Mean	0.0571338	-9.94364	FC Mean	-9.80263	0.00011799
		LDN 2	2624	2648	2622	2631.33		LDN 2	168.5	280.8	138.9	196.067	0.0745123	LDN S.E.M	0.00980794	-7.51637	FC S.E.M	1.83145
		LDN 3	2608	2538	2492	2546		LDN 3	108.5	127.4	73.94	103.28	0.0405656			-13.8063
Fgf7			i	ii	iii	Mean			i	ii	iii	Mean	Relative expression (GOI/Tbp)		Mean (GOI/Tbp)	Fold change			T-test
		Control 1	3171	2973	2814	2986		Control 1	3441	3429	3948	3606	1.20764	Control Mean	1.10471
		Control 2	2603	2307	2446	2452		Control 2	2517	2607	2056	2393.33	0.976074	Control S.E.M	0.0680706
		Control 3	2209	2157	2282	2216		Control 3	2601	2513	2401	2505	1.13042
		LDN 1	2467	2698	2647	2604		LDN 1	1521	1682	1455	1552.67	0.596262	LDN Mean	0.675145	-1.85272	FC Mean	-1.63625	0.0275249
		LDN 2	2624	2648	2622	2631.33		LDN 2	2160	2258	2581	2333	0.886623	LDN S.E.M	0.10687	-1.24597	FC S.E.M	0.238764
		LDN 3	2608	2538	2492	2546		LDN 3	1572	1183	1389	1381.33	0.54255			-2.03614
Fgf9			i	ii	iii	Mean			i	ii	iii	Mean	Relative expression (GOI/Tbp)		Mean (GOI/Tbp)	Fold change			T-test
		Control 1	3171	2973	2814	2986		Control 1	3286	2755	3265	3102	1.03885	Control Mean	0.763865
		Control 2	2603	2307	2446	2452		Control 2	1408	1899	1718	1675	0.683116	Control S.E.M	0.141341
		Control 3	2209	2157	2282	2216		Control 3	1200	969.9	1617	1262.3	0.56963
		LDN 1	2467	2698	2647	2604		LDN 1	1591	941.9	1345	1292.63	0.496403	LDN Mean	0.58516	-1.5388	FC Mean	-1.30539	0.357355
		LDN 2	2624	2648	2622	2631.33		LDN 2	1717	2154	2292	2054.33	0.78072	LDN S.E.M	0.0979183	-0.978411	FC S.E.M	0.197184
		LDN 3	2608	2538	2492	2546		LDN 3	1487	964.7	1202	1217.9	0.478358			-1.59685
Fgf10			i	ii	iii	Mean			i	ii	iii	Mean	Relative expression (GOI/Tbp)		Mean (GOI/Tbp)	Fold change			T-test
		Control 1	3171	2973	2814	2986		Control 1	1193	1619	1690	1500.67	0.502568	Control Mean	0.625236
		Control 2	2603	2307	2446	2452		Control 2		1852	1690	1771	0.722268	Control S.E.M	0.0647043
		Control 3	2209	2157	2282	2216		Control 3	1227	1878	1222	1442.33	0.650872
		LDN 1	2467	2698	2647	2604		LDN 1	1900	1746	1913	1853	0.711598	LDN Mean	0.591547	-0.878637	FC Mean	-1.05695	0.792709
		LDN 2	2624	2648	2622	2631.33		LDN 2	1922	1816	1568	1768.67	0.672156	LDN S.E.M	0.100974	-0.930194	FC S.E.M	0.232182
		LDN 3	2608	2538	2492	2546		LDN 3		1004	986.4	995.2	0.390888			-1.59953
Fgf18			i	ii	iii	Mean			i	ii	iii	Mean	Relative expression (GOI/Tbp)		Mean (GOI/Tbp)	Fold change			T-test
		Control 1	3171	2973	2814	2986		Control 1	7688	6783	7483	7318	2.45077	Control Mean	2.30024
		Control 2	2603	2307	2446	2452		Control 2	5414	4490	5886	5263.33	2.14655	Control S.E.M	0.0878359
		Control 3	2209	2157	2282	2216		Control 3	5235	5221	4857	5104.33	2.3034
		LDN 1	2467	2698	2647	2604		LDN 1	8181	7950	7840	7990.33	3.06848	LDN Mean	3.04771	1.33399	FC Mean	1.32495	0.0054596
		LDN 2	2624	2648	2622	2631.33		LDN 2	8764	8423	8217	8468	3.21814	LDN S.E.M	0.10491	1.39905	FC S.E.M	0.0456083
		LDN 3	2608	2538	2492	2546		LDN 3	7908	6620	7290	7272.67	2.85651			1.24183
Fgf20			i	ii	iii	Mean			i	ii	iii	Mean	Relative expression (GOI/Tbp)		Mean (GOI/Tbp)	Fold change			T-test
		Control 1	3171	2973	2814	2986		Control 1	1731	1293	1374	1466	0.490958	Control Mean	0.731312
		Control 2	2603	2307	2446	2452		Control 2	1990	1799	1994	1927.67	0.786161	Control S.E.M	0.125957
		Control 3	2209	2157	2282	2216		Control 3	1985	2119	1991	2031.67	0.916817
		LDN 1	2467	2698	2647	2604		LDN 1	2350	1827	2343	2173.33	0.834613	LDN Mean	0.861758	1.14125	FC Mean	1.17837	0.381525
		LDN 2	2624	2648	2622	2631.33		LDN 2	1815	2322	2229	2122	0.806435	LDN S.E.M	0.0420286	1.10272	FC S.E.M	0.0574702
		LDN 3	2608	2538	2492	2546		LDN 3	2237	2893	2082	2404	0.944226			1.29114
Wnt5b			i	ii	iii	Mean			i	ii	iii	Mean	Relative expression (GOI/Tbp)		Mean (GOI/Tbp)	Fold change			T-test
		Control 1	3171	2973	2814	2986		Control 1	2775	2631	2536	2647.33	0.886582	Control Mean	0.804731
		Control 2	2603	2307	2446	2452		Control 2	1897	2111	2085	2031	0.828303	Control S.E.M	0.0553311
		Control 3	2209	2157	2282	2216		Control 3	1241	1771	1637	1549.67	0.699308
		LDN 1	2467	2698	2647	2604		LDN 1	1761	2556	2030	2115.67	0.812468	LDN Mean	0.849648	1.00961	FC Mean	1.05582	0.679373
		LDN 2	2624	2648	2622	2631.33		LDN 2	2363	2484	3133	2660	1.01089	LDN S.E.M	0.0844344	1.25619	FC S.E.M	0.104922
		LDN 3	2608	2538	2492	2546		LDN 3	1755	1877	1910	1847.33	0.725583			0.901646
Wnt9a			i	ii	iii	Mean			i	ii	iii	Mean	Relative expression (GOI/Tbp)		Mean (GOI/Tbp)	Fold change			T-test
		Control 1	3171	2973	2814	2986		Control 1	2514	2481	3415	2803.33	0.938826	Control Mean	1.23941
		Control 2	2603	2307	2446	2452		Control 2	3750	3545	3391	3562	1.45269	Control S.E.M	0.15463
		Control 3	2209	2157	2282	2216		Control 3	3252	2545	3023	2940	1.32671
		LDN 1	2467	2698	2647	2604		LDN 1	2551	4482	3523	3518.67	1.35125	LDN Mean	1.24913	1.09024	FC Mean	1.00784	0.963093
		LDN 2	2624	2648	2622	2631.33		LDN 2	4448	3526	3011	3661.67	1.39156	LDN S.E.M	0.122828	1.12276	FC S.E.M	0.0991019
		LDN 3	2608	2538	2492	2546		LDN 3	2883	2175	2615	2557.67	1.00458			0.810532
Fzd1			i	ii	iii	Mean			i	ii	iii	Mean	Relative expression (GOI/Tbp)		Mean (GOI/Tbp)	Fold change			T-test
		Control 1	3171	2973	2814	2986		Control 1	1514	1613	1533	1553.33	0.520205	Control Mean	0.548324
		Control 2	2603	2307	2446	2452		Control 2	1293	1402	1477	1390.67	0.567156	Control S.E.M	0.0143269
		Control 3	2209	2157	2282	2216		Control 3	1223	1211	1273	1235.67	0.557611
		LDN 1	2467	2698	2647	2604		LDN 1	1172	1134	1100	1135.33	0.435996	LDN Mean	0.394777	-1.25764	FC Mean	-1.38895	0.00857004
		LDN 2	2624	2648	2622	2631.33		LDN 2	1065	1085	1073	1074.33	0.408285	LDN S.E.M	0.0285089	-1.34299	FC S.E.M	0.106933
		LDN 3	2608	2538	2492	2546		LDN 3	852.6	827.9	916.8	865.767	0.34005			-1.61248
Fzd2			i	ii	iii	Mean			i	ii	iii	Mean	Relative expression (GOI/Tbp)		Mean (GOI/Tbp)	Fold change			T-test
		Control 1	3171	2973	2814	2986		Control 1	3218	3634	3591	3481	1.16577	Control Mean	1.18609
		Control 2	2603	2307	2446	2452		Control 2	2855	3134	2943	2977.33	1.21425	Control S.E.M	0.0145318
		Control 3	2209	2157	2282	2216		Control 3	2531	2664	2638	2611	1.17825
		LDN 1	2467	2698	2647	2604		LDN 1	2051	2290	2233	2191.33	0.841526	LDN Mean	0.823662	-1.40945	FC Mean	-1.44002	0.00185311
		LDN 2	2624	2648	2622	2631.33		LDN 2	2369	2348	2350	2355.67	0.895237	LDN S.E.M	0.0473309	-1.32489	FC S.E.M	0.0862798
		LDN 3	2608	2538	2492	2546		LDN 3	1865	1951	1792	1869.33	0.734224			-1.61543
Fzd4			i	ii	iii	Mean			i	ii	iii	Mean	Relative expression (GOI/Tbp)		Mean (GOI/Tbp)	Fold change			T-test
		Control 1	3171	2973	2814	2986		Control 1	1981	1775	1985	1913.67	0.64088	Control Mean	0.685132
		Control 2	2603	2307	2446	2452		Control 2	1612	1984	1976	1857.33	0.757477	Control S.E.M	0.036472
		Control 3	2209	2157	2282	2216		Control 3	1394	1493	1481	1456	0.65704
		LDN 1	2467	2698	2647	2604		LDN 1	1663	1545	1601	1603	0.615591	LDN Mean	0.600317	-1.11297	FC Mean	-1.14128	0.473385
		LDN 2	2624	2648	2622	2631.33		LDN 2	1985	2127	1942	2018	0.766912	LDN S.E.M	0.100882	-0.893365	FC S.E.M	0.220686
		LDN 3	2608	2538	2492	2546		LDN 3	1019	886.1	1291	1065.37	0.418447			-1.63732
Fzd7			i	ii	iii	Mean			i	ii	iii	Mean	Relative expression (GOI/Tbp)		Mean (GOI/Tbp)	Fold change			T-test
		Control 1	3171	2973	2814	2986		Control 1	4592	4783	5063	4812.67	1.61174	Control Mean	1.49316
		Control 2	2603	2307	2446	2452		Control 2	3305	3274	3398	3325.67	1.35631	Control S.E.M	0.0743017
		Control 3	2209	2157	2282	2216		Control 3	3300	3380	3368	3349.33	1.51143
		LDN 1	2467	2698	2647	2604		LDN 1	2146	3004	2733	2627.67	1.00909	LDN Mean	0.997845	-1.47971	FC Mean	-1.49639	0.0363921
		LDN 2	2624	2648	2622	2631.33		LDN 2	3056	3273	3440	3256.33	1.23752	LDN S.E.M	0.141735	-1.20657	FC S.E.M	0.232429
		LDN 3	2608	2538	2492	2546		LDN 3	2058	1745	1902	1901.67	0.746923			-1.99908
Fzd8			i	ii	iii	Mean			i	ii	iii	Mean	Relative expression (GOI/Tbp)		Mean (GOI/Tbp)	Fold change			T-test
		Control 1	3171	2973	2814	2986		Control 1	2627	2536	3061	2741.33	0.918062	Control Mean	0.873214
		Control 2	2603	2307	2446	2452		Control 2	2147	1933	1893	1991	0.81199	Control S.E.M	0.0316962
		Control 3	2209	2157	2282	2216		Control 3	1794	2171	1949	1971.33	0.889591
		LDN 1	2467	2698	2647	2604		LDN 1	1565	1543	1567	1558.33	0.598438	LDN Mean	0.634592	-1.45916	FC Mean	-1.37603	0.0158481
		LDN 2	2624	2648	2622	2631.33		LDN 2	1924	1995	1873	1930.67	0.733722	LDN S.E.M	0.0501661	-1.19012	FC S.E.M	0.103005
		LDN 3	2608	2538	2492	2546		LDN 3	1377	1469	1520	1455.33	0.571616			-1.52763
Fzd10			i	ii	iii	Mean			i	ii	iii	Mean	Relative expression (GOI/Tbp)		Mean (GOI/Tbp)	Fold change			T-test
		Control 1	3171	2973	2814	2986		Control 1	2194	2460	2382	2345.33	0.785443	Control Mean	0.765201
		Control 2	2603	2307	2446	2452		Control 2	1697	1832	1785	1771.33	0.722403	Control S.E.M	0.0214091
		Control 3	2209	2157	2282	2216		Control 3	1711	1809	1717	1745.67	0.787756
		LDN 1	2467	2698	2647	2604		LDN 1	2419	2419	2387	2408.33	0.924859	LDN Mean	0.819079	1.20865	FC Mean	1.07041	0.649178
		LDN 2	2624	2648	2622	2631.33		LDN 2	2374	2418	2538	2443.33	0.928553	LDN S.E.M	0.107633	1.21348	FC S.E.M	0.14066
		LDN 3	2608	2538	2492	2546		LDN 3	1406	1634	1572	1537.33	0.603823			0.789104
Ror1			i	ii	iii	Mean			i	ii	iii	Mean	Relative expression (GOI/Tbp)		Mean (GOI/Tbp)	Fold change			T-test
		Control 1	3171	2973	2814	2986		Control 1	7919	9058	11190	9389	3.14434	Control Mean	3.30056
		Control 2	2603	2307	2446	2452		Control 2	5216	8275	12620	8703.67	3.54962	Control S.E.M	0.125865
		Control 3	2209	2157	2282	2216		Control 3	7048	5891	8386	7108.33	3.20773
		LDN 1	2467	2698	2647	2604		LDN 1	5202	7672	7853	6909	2.65323	LDN Mean	2.65863	-1.24398	FC Mean	-1.24145	0.0347027
		LDN 2	2624	2648	2622	2631.33		LDN 2	6124	8811	8271	7735.33	2.9397	LDN S.E.M	0.160742	-1.12275	FC S.E.M	0.0757969
		LDN 3	2608	2538	2492	2546		LDN 3	6114	6695	5392	6067	2.38295			-1.38507
Ror2			i	ii	iii	Mean			i	ii	iii	Mean	Relative expression (GOI/Tbp)		Mean (GOI/Tbp)	Fold change			T-test
		Control 1	3171	2973	2814	2986		Control 1	4242	4364	4181	4262.33	1.42744	Control Mean	1.3924
		Control 2	2603	2307	2446	2452		Control 2	3278	3337	3283	3299.33	1.34557	Control S.E.M	0.0243576
		Control 3	2209	2157	2282	2216		Control 3	3238	3020	3077	3111.67	1.40418
		LDN 1	2467	2698	2647	2604		LDN 1	3451	3663	3554	3556	1.36559	LDN Mean	1.27735	-1.01963	FC Mean	-1.09007	0.484771
		LDN 2	2624	2648	2622	2631.33		LDN 2	3630	4234	3797	3887	1.4772	LDN S.E.M	0.147603	-0.942593	FC S.E.M	0.143861
		LDN 3	2608	2538	2492	2546		LDN 3	2445	2543	2568	2518.67	0.989264			-1.40751
Dkk1			i	ii	iii	Mean			i	ii	iii	Mean	Relative expression (GOI/Tbp)		Mean (GOI/Tbp)	Fold change			T-test
		Control 1	3171	2973	2814	2986		Control 1	2118	2285	2437	2280	0.763563	Control Mean	0.810428
		Control 2	2603	2307	2446	2452		Control 2	2080	2158	2318	2185.33	0.891245	Control S.E.M	0.0405804
		Control 3	2209	2157	2282	2216		Control 3	1683	1508	1971	1720.67	0.776474
		LDN 1	2467	2698	2647	2604		LDN 1	540.3	389.7	511.8	480.6	0.184562	LDN Mean	0.152816	-4.39108	FC Mean	-5.30328	0.000114065
		LDN 2	2624	2648	2622	2631.33		LDN 2	357.3	364.5	411.5	377.767	0.143565	LDN S.E.M	0.0163268	-5.64503	FC S.E.M	0.539622
		LDN 3	2608	2538	2492	2546		LDN 3	358.2	293.5	343.7	331.8	0.130322			-6.21865
Dkk4			i	ii	iii	Mean			i	ii	iii	Mean	Relative expression (GOI/Tbp)		Mean (GOI/Tbp)	Fold change			T-test
		Control 1	3171	2973	2814	2986		Control 1	1936	2015	2179	2043.33	0.684305	Control Mean	1.02405
		Control 2	2603	2307	2446	2452		Control 2	2868	2786	3132	2928.67	1.1944	Control S.E.M	0.169872
		Control 3	2209	2157	2282	2216		Control 3	2666	2664	2604	2644.67	1.19344
		LDN 1	2467	2698	2647	2604		LDN 1	11650	12920	12420	12330	4.73502	LDN Mean	3.37262	4.62383	FC Mean	3.29342	0.0403273
		LDN 2	2624	2648	2622	2631.33		LDN 2	5339	5630	5463	5477.33	2.08158	LDN S.E.M	0.766813	2.0327	FC S.E.M	0.748806
		LDN 3	2608	2538	2492	2546		LDN 3	8527	8176	8512	8405	3.30126			3.22373

## Sheet: Fig 1D FGF9 treatment
Gene symbol			Tbp quantity (Copies)						GOI quantity (Copies)
Bmp2			i	ii	iii	Mean			i	ii	iii	Mean	Relative expression (GOI/Tbp)		Mean (GOI/Tbp)	Fold change			T-test
		Control 1	1542	1670	1737	1649.67		Control 1	1955	1983	1991	1976.33	1.19802	Control Mean	0.961879
		Control 2	1215	1205	1306	1242		Control 2	1086	1153	1269	1169.33	0.941492	Control S.E.M	0.130849
		Control 3	1639	1637	1561	1612.33		Control 3	1198	1250	1161	1203	0.746124
		FGF9 1	1638	1561	1604	1601		FGF9 1	873.4	1010	1064	982.467	0.613658	FGF9 Mean	0.501603	-1.56745	FC Mean	-1.91761	0.0168349
		FGF9 2	1932	1832	2154	1972.67		FGF9 2	705.1	675.8	744.2	708.367	0.359091	FGF9 S.E.M	0.0601653	-2.67865	FC S.E.M	0.25895
		FGF9 3	1648	1475	1763	1628.67		FGF9 3	979.3	938.4	954.9	957.533	0.587925			-1.63606
		FGF9 4	1586	1505	1743	1611.33		FGF9 4	720.2	685.1	749.4	718.233	0.445739			-2.15794
Bmp4			i	ii	iii	Mean			i	ii	iii	Mean	Relative expression (GOI/Tbp)		Mean (GOI/Tbp)	Fold change			T-test
		Control 1	1542	1670	1737	1649.67		Control 1	2136	1749	2168	2017.67	1.22308	Control Mean	1.28053
		Control 2	1215	1205	1306	1242		Control 2	2130	1945	1914	1996.33	1.60735	Control S.E.M	0.174486
		Control 3	1639	1637	1561	1612.33		Control 3	1492	1622	1777	1630.33	1.01116
		FGF9 1	1638	1561	1604	1601		FGF9 1	1796	2009	1970	1925	1.20237	FGF9 Mean	1.12601	-1.065	FC Mean	-1.13723	0.368239
		FGF9 2	1932	1832	2154	1972.67		FGF9 2	1732	2163	2125	2006.67	1.01724	FGF9 S.E.M	0.0471774	-1.25883	FC S.E.M	0.0486717
		FGF9 3	1648	1475	1763	1628.67		FGF9 3	1559	1809	1894	1754	1.07695			-1.18903
		FGF9 4	1586	1505	1743	1611.33		FGF9 4	2131	1840	1866	1945.67	1.20749			-1.06049
Rgma			i	ii	iii	Mean			i	ii	iii	Mean	Relative expression (GOI/Tbp)		Mean (GOI/Tbp)	Fold change			T-test
		Control 1	1542	1670	1737	1649.67		Control 1	2778	3061	2975	2938	1.78097	Control Mean	1.51854
		Control 2	1215	1205	1306	1242		Control 2	1995	2035	2047	2025.67	1.63097	Control S.E.M	0.192365
		Control 3	1639	1637	1561	1612.33		Control 3	1834	1887	1811	1844	1.14368
		FGF9 1	1638	1561	1604	1601		FGF9 1	3347	3475	3742	3521.33	2.19946	FGF9 Mean	1.67735	1.4484	FC Mean	1.10458	0.592064
		FGF9 2	1932	1832	2154	1972.67		FGF9 2	3424	3295	3343	3354	1.70024	FGF9 S.E.M	0.191193	1.11965	FC S.E.M	0.687954
		FGF9 3	1648	1475	1763	1628.67		FGF9 3	2216	2688	2411	2438.33	1.49713			-1.0143
		FGF9 4	1586	1505	1743	1611.33		FGF9 4	2038	2094	2213	2115	1.31258			-1.15691
Rgmb			i	ii	iii	Mean			i	ii	iii	Mean	Relative expression (GOI/Tbp)		Mean (GOI/Tbp)	Fold change			T-test
		Control 1	1542	1670	1737	1649.67		Control 1	1820	1800	1937	1852.33	1.12285	Control Mean	0.971467
		Control 2	1215	1205	1306	1242		Control 2	1126	1174	1140	1146.67	0.923242	Control S.E.M	0.0773363
		Control 3	1639	1637	1561	1612.33		Control 3	1315	1394	1491	1400	0.868307
		FGF9 1	1638	1561	1604	1601		FGF9 1	2063	2063	2051	2059	1.28607	FGF9 Mean	0.970988	1.32384	FC Mean	-1.00049	0.997584
		FGF9 2	1932	1832	2154	1972.67		FGF9 2	1995	1729	1896	1873.33	0.949645	FGF9 S.E.M	0.114862	-1.02298	FC S.E.M	0.618411
		FGF9 3	1648	1475	1763	1628.67		FGF9 3	1416	1474	1566	1485.33	0.911993			-1.06521
		FGF9 4	1586	1505	1743	1611.33		FGF9 4	1176	1169	1214	1186.33	0.736243			-1.31949
Bambi			i	ii	iii	Mean			i	ii	iii	Mean	Relative expression (GOI/Tbp)		Mean (GOI/Tbp)	Fold change			T-test
		Control 1	1542	1670	1737	1649.67		Control 1	2136	1749	2168	2017.67	1.22308	Control Mean	1.28053
		Control 2	1215	1205	1306	1242		Control 2	2130	1945	1914	1996.33	1.60735	Control S.E.M	0.174486
		Control 3	1639	1637	1561	1612.33		Control 3	1492	1622	1777	1630.33	1.01116
		FGF9 1	1638	1561	1604	1601		FGF9 1	1796	2009	1970	1925	1.20237	FGF9 Mean	1.12601	-1.065	FC Mean	-1.13723	0.368239
		FGF9 2	1932	1832	2154	1972.67		FGF9 2	1732	2163	2125	2006.67	1.01724	FGF9 S.E.M	0.0471774	-1.25883	FC S.E.M	0.0486717
		FGF9 3	1648	1475	1763	1628.67		FGF9 3	1559	1809	1894	1754	1.07695			-1.18903
		FGF9 4	1586	1505	1743	1611.33		FGF9 4	2131	1840	1866	1945.67	1.20749			-1.06049
Ctgf			i	ii	iii	Mean			i	ii	iii	Mean	Relative expression (GOI/Tbp)		Mean (GOI/Tbp)	Fold change			T-test
		Control 1	1542	1670	1737	1649.67		Control 1	2065	2220	2323	2202.67	1.33522	Control Mean	1.28541
		Control 2	1215	1205	1306	1242		Control 2	1668	1543	1840	1683.67	1.35561	Control S.E.M	0.0602955
		Control 3	1639	1637	1561	1612.33		Control 3	1919	1849	1869	1879	1.16539
		FGF9 1	1638	1561	1604	1601		FGF9 1	1951	1731	1696	1792.67	1.11972	FGF9 Mean	0.898624	-1.14797	FC Mean	-1.43042	0.0128559
		FGF9 2	1932	1832	2154	1972.67		FGF9 2	1814	1568	1706	1696	0.85975	FGF9 S.E.M	0.0751709	-1.49509	FC S.E.M	0.106846
		FGF9 3	1648	1475	1763	1628.67		FGF9 3	1053	1320	1474	1282.33	0.787352			-1.63257
		FGF9 4	1586	1505	1743	1611.33		FGF9 4	1060	1618	1323	1333.67	0.827679			-1.55303
Tsku			i	ii	iii	Mean			i	ii	iii	Mean	Relative expression (GOI/Tbp)		Mean (GOI/Tbp)	Fold change			T-test
		Control 1	1542	1670	1737	1649.67		Control 1	2342	2201	2322	2288.33	1.38715	Control Mean	1.24784
		Control 2	1215	1205	1306	1242		Control 2	1515	1575	1554	1548	1.24638	Control S.E.M	0.0800135
		Control 3	1639	1637	1561	1612.33		Control 3	1811	1787	1771	1789.67	1.10999
		FGF9 1	1638	1561	1604	1601		FGF9 1	2234	1966	2173	2124.33	1.32688	FGF9 Mean	1.16929	1.06334	FC Mean	-1.06717	0.49066
		FGF9 2	1932	1832	2154	1972.67		FGF9 2	2209	2232	2181	2207.33	1.11896	FGF9 S.E.M	0.0690793	-1.11518	FC S.E.M	0.548896
		FGF9 3	1648	1475	1763	1628.67		FGF9 3	1863	2164	1961	1996	1.22554			-1.01819
		FGF9 4	1586	1505	1743	1611.33		FGF9 4	1510	1621	1731	1620.67	1.00579			-1.24065
Nog			i	ii	iii	Mean			i	ii	iii	Mean	Relative expression (GOI/Tbp)		Mean (GOI/Tbp)	Fold change			T-test
		Control 1	1542	1670	1737	1649.67		Control 1	1668	1991	1566	1741.67	1.05577	Control Mean	1.18109
		Control 2	1215	1205	1306	1242		Control 2	1607	1717	2193	1839	1.48068	Control S.E.M	0.150458
		Control 3	1639	1637	1561	1612.33		Control 3	1478	1734	1658	1623.33	1.00682
		FGF9 1	1638	1561	1604	1601		FGF9 1	1984	2761	2369	2371.33	1.48116	FGF9 Mean	1.07404	1.25406	FC Mean	-1.09967	0.658637
		FGF9 2	1932	1832	2154	1972.67		FGF9 2	2364	2262	2369	2331.67	1.18199	FGF9 S.E.M	0.160784	1.00076	FC S.E.M	0.74491
		FGF9 3	1648	1475	1763	1628.67		FGF9 3	1351	1268	1417	1345.33	0.826034			-1.42983
		FGF9 4	1586	1505	1743	1611.33		FGF9 4	1134	1428	1339	1300.33	0.806992			-1.46357
Fgf7			i	ii	iii	Mean			i	ii	iii	Mean	Relative expression (GOI/Tbp)		Mean (GOI/Tbp)	Fold change			T-test
		Control 1	1542	1670	1737	1649.67		Control 1	1295	1682	1406	1461	0.885633	Control Mean	0.84305
		Control 2	1215	1205	1306	1242		Control 2	990.4	953.6	1184	1042.67	0.839506	Control S.E.M	0.023629
		Control 3	1639	1637	1561	1612.33		Control 3	1097	1290	1502	1296.33	0.804011
		FGF9 1	1638	1561	1604	1601		FGF9 1	1247	968.4	1131	1115.47	0.696731	FGF9 Mean	0.587814	-1.21001	FC Mean	-1.43421	0.037073
		FGF9 2	1932	1832	2154	1972.67		FGF9 2	1059	1251	881.8	1063.93	0.539338	FGF9 S.E.M	0.0746245	-1.56312	FC S.E.M	0.21845
		FGF9 3	1648	1475	1763	1628.67		FGF9 3	1177	1042	1284	1167.67	0.716946			-1.17589
		FGF9 4	1586	1505	1743	1611.33		FGF9 4	717.6	501.7	705.8	641.7	0.398242			-2.11693
Fgf9			i	ii	iii	Mean			i	ii	iii	Mean	Relative expression (GOI/Tbp)		Mean (GOI/Tbp)	Fold change			T-test
		Control 1	1542	1670	1737	1649.67		Control 1	2223	2297	2153	2224.33	1.34835	Control Mean	1.26032
		Control 2	1215	1205	1306	1242		Control 2	1739	1495	1547	1593.67	1.28315	Control S.E.M	0.0585348
		Control 3	1639	1637	1561	1612.33		Control 3	1717	1842	2001	1853.33	1.14947
		FGF9 1	1638	1561	1604	1601		FGF9 1	1837	1409		1623	1.01374	FGF9 Mean	0.877535	-1.24324	FC Mean	-1.43621	0.0489151
		FGF9 2	1932	1832	2154	1972.67		FGF9 2	2080	2372	1926	2126	1.07773	FGF9 S.E.M	0.11792	-1.16943	FC S.E.M	0.259342
		FGF9 3	1648	1475	1763	1628.67		FGF9 3	1403	1311	1537	1417	0.870037			-1.44859
		FGF9 4	1586	1505	1743	1611.33		FGF9 4	1037	746.8	868.3	884.033	0.548635			-2.2972
Fgf10			i	ii	iii	Mean			i	ii	iii	Mean	Relative expression (GOI/Tbp)		Mean (GOI/Tbp)	Fold change			T-test
		Control 1	1542	1670	1737	1649.67		Control 1	1968		2146	2057	1.24692	Control Mean	1.18955
		Control 2	1215	1205	1306	1242		Control 2	1760	1384	1807	1650.33	1.32877	Control S.E.M	0.101091
		Control 3	1639	1637	1561	1612.33		Control 3	1534	1351	1918	1601	0.992971
		FGF9 1	1638	1561	1604	1601		FGF9 1	1617	1841	2050	1836	1.14678	FGF9 Mean	0.920209	-1.0373	FC Mean	-1.2927	0.14649
		FGF9 2	1932	1832	2154	1972.67		FGF9 2	2266	1948	2036	2083.33	1.0561	FGF9 S.E.M	0.11159	-1.12636	FC S.E.M	0.176279
		FGF9 3	1648	1475	1763	1628.67		FGF9 3	1582		1097	1339.5	0.822452			-1.44635
		FGF9 4	1586	1505	1743	1611.33		FGF9 4	1182	1165	821.7	1056.23	0.655503			-1.81472
Fgf18			i	ii	iii	Mean			i	ii	iii	Mean	Relative expression (GOI/Tbp)		Mean (GOI/Tbp)	Fold change			T-test
		Control 1	1542	1670	1737	1649.67		Control 1	1392	1278	1214	1294.67	0.784805	Control Mean	0.758333
		Control 2	1215	1205	1306	1242		Control 2	966.6	806.9	856.4	876.633	0.705824	Control S.E.M	0.0262549
		Control 3	1639	1637	1561	1612.33		Control 3	1222	1260	1312	1264.67	0.78437
		FGF9 1	1638	1561	1604	1601		FGF9 1	1070	1058	1039	1055.67	0.65938	FGF9 Mean	0.540162	-1.15007	FC Mean	-1.4039	0.0371624
		FGF9 2	1932	1832	2154	1972.67		FGF9 2	941.3	1068	911.4	973.567	0.493528	FGF9 S.E.M	0.0627246	-1.53655	FC S.E.M	0.186908
		FGF9 3	1648	1475	1763	1628.67		FGF9 3	1008	1030	1004	1014	0.622595			-1.21802
		FGF9 4	1586	1505	1743	1611.33		FGF9 4	624.3	734.9	502.6	620.6	0.385147			-1.96895
Fgf20			i	ii	iii	Mean			i	ii	iii	Mean	Relative expression (GOI/Tbp)		Mean (GOI/Tbp)	Fold change			T-test
		Control 1	1542	1670	1737	1649.67		Control 1	1994	1781	1852	1875.67	1.137	Control Mean	1.09642
		Control 2	1215	1205	1306	1242		Control 2	1435	1298	1709	1480.67	1.19216	Control S.E.M	0.069996
		Control 3	1639	1637	1561	1612.33		Control 3	1509	1505	1630	1548	0.960099
		FGF9 1	1638	1561	1604	1601		FGF9 1	635.9	793.1	672.5	700.5	0.437539	FGF9 Mean	0.388988	-2.50588	FC Mean	-2.81865	0.0004927
		FGF9 2	1932	1832	2154	1972.67		FGF9 2	347.4	593	505.5	481.967	0.244322	FGF9 S.E.M	0.055989	-4.48759	FC S.E.M	0.512486
		FGF9 3	1648	1475	1763	1628.67		FGF9 3	883.7	903.4	688.8	825.3	0.506734			-2.1637
		FGF9 4	1586	1505	1743	1611.33		FGF9 4	518.5	710.6	546.7	591.933	0.367356			-2.98462
Wnt5b			i	ii	iii	Mean			i	ii	iii	Mean	Relative expression (GOI/Tbp)		Mean (GOI/Tbp)	Fold change			T-test
		Control 1	1542	1670	1737	1649.67		Control 1	1490	1274	1485	1416.33	0.858557	Control Mean	0.902326
		Control 2	1215	1205	1306	1242		Control 2	959.8	1237	1328	1174.93	0.946001	Control S.E.M	0.0252429
		Control 3	1639	1637	1561	1612.33		Control 3	1277	1365	1723	1455	0.902419
		FGF9 1	1638	1561	1604	1601		FGF9 1	1147	1259	1947	1451	0.906309	FGF9 Mean	0.782976	1.00441	FC Mean	-1.15243	0.132588
		FGF9 2	1932	1832	2154	1972.67		FGF9 2	1221	1402	1235	1286	0.651909	FGF9 S.E.M	0.0532805	-1.38413	FC S.E.M	0.560853
		FGF9 3	1648	1475	1763	1628.67		FGF9 3	1709	857.7	1418	1328.23	0.815534			-1.10642
		FGF9 4	1586	1505	1743	1611.33		FGF9 4	1330	1397	937.9	1221.63	0.758151			-1.19017
Wnt9a			i	ii	iii	Mean			i	ii	iii	Mean	Relative expression (GOI/Tbp)		Mean (GOI/Tbp)	Fold change			T-test
		Control 1	1542	1670	1737	1649.67		Control 1	1678	1793	1510	1660.33	1.00647	Control Mean	1.02642
		Control 2	1215	1205	1306	1242		Control 2	1253	1068	1489	1270	1.02254	Control S.E.M	0.0127833
		Control 3	1639	1637	1561	1612.33		Control 3	1636	1829	1615	1693.33	1.05024
		FGF9 1	1638	1561	1604	1601		FGF9 1	1444	1511	1577	1510.67	0.943577	FGF9 Mean	0.780055	-1.08779	FC Mean	-1.31583	0.22202
		FGF9 2	1932	1832	2154	1972.67		FGF9 2	770.4	1784	1386	1313.47	0.665833	FGF9 S.E.M	0.14906	-1.54155	FC S.E.M	0.744444
		FGF9 3	1648	1475	1763	1628.67		FGF9 3	1530	1824	1978	1777.33	1.09128			1.0632
		FGF9 4	1586	1505	1743	1611.33		FGF9 4	477.7	883.9	666.4	676	0.419528			-2.4466
Fzd1			i	ii	iii	Mean			i	ii	iii	Mean	Relative expression (GOI/Tbp)		Mean (GOI/Tbp)	Fold change			T-test
		Control 1	1542	1670	1737	1649.67		Control 1	1357	1851	1321	1509.67	0.915134	Control Mean	1.26506
		Control 2	1215	1205	1306	1242		Control 2	2535	1892	1867	2098	1.68921	Control S.E.M	0.226518
		Control 3	1639	1637	1561	1612.33		Control 3	1956		1884	1920	1.19082
		FGF9 1	1638	1561	1604	1601		FGF9 1	1694	1875	1700	1756.33	1.09702	FGF9 Mean	0.829024	-1.15317	FC Mean	-1.52596	0.136422
		FGF9 2	1932	1832	2154	1972.67		FGF9 2	1365	1762	1545	1557.33	0.789456	FGF9 S.E.M	0.132461	-1.60244	FC S.E.M	0.33259
		FGF9 3	1648	1475	1763	1628.67		FGF9 3	1470	1626		1548	0.950471			-1.33098
		FGF9 4	1586	1505	1743	1611.33		FGF9 4	774	761.3	780.9	772.067	0.479148			-2.64022
Fzd2			i	ii	iii	Mean			i	ii	iii	Mean	Relative expression (GOI/Tbp)		Mean (GOI/Tbp)	Fold change			T-test
		Control 1	1542	1670	1737	1649.67		Control 1	2181	2928	2854	2654.33	1.60901	Control Mean	1.5783
		Control 2	1215	1205	1306	1242		Control 2	2039	2419	2397	2285	1.83977	Control S.E.M	0.16056
		Control 3	1639	1637	1561	1612.33		Control 3	2104	2099	2018	2073.67	1.28613
		FGF9 1	1638	1561	1604	1601		FGF9 1	2438	2636	2404	2492.67	1.55694	FGF9 Mean	1.17634	-1.01372	FC Mean	-1.34171	0.127275
		FGF9 2	1932	1832	2154	1972.67		FGF9 2	2356	2394	2709	2486.33	1.26039	FGF9 S.E.M	0.147277	-1.25223	FC S.E.M	0.163448
		FGF9 3	1648	1475	1763	1628.67		FGF9 3	1953	1028	1562	1514.33	0.929799			-1.69747
		FGF9 4	1586	1505	1743	1611.33		FGF9 4	1492	1433	1707	1544	0.958213			-1.64713
Fzd4			i	ii	iii	Mean			i	ii	iii	Mean	Relative expression (GOI/Tbp)		Mean (GOI/Tbp)	Fold change			T-test
		Control 1	1542	1670	1737	1649.67		Control 1	1145	1199	1130	1158	0.70196	Control Mean	0.683716
		Control 2	1215	1205	1306	1242		Control 2	946.7	939	905	930.233	0.74898	Control S.E.M	0.0439053
		Control 3	1639	1637	1561	1612.33		Control 3	897.6	972.6	1033	967.733	0.600207
		FGF9 1	1638	1561	1604	1601		FGF9 1	999.1	1080	1177	1085.37	0.67793	FGF9 Mean	0.588299	-1.00853	FC Mean	-1.16219	0.204109
		FGF9 2	1932	1832	2154	1972.67		FGF9 2	1174	1086	1139	1133	0.574349	FGF9 S.E.M	0.0456819	-1.19042	FC S.E.M	0.100206
		FGF9 3	1648	1475	1763	1628.67		FGF9 3	1049	983.6	1065	1032.53	0.633975			-1.07846
		FGF9 4	1586	1505	1743	1611.33		FGF9 4	906.5	664.9	685.8	752.4	0.466942			-1.46424
Fzd7			i	ii	iii	Mean			i	ii	iii	Mean	Relative expression (GOI/Tbp)		Mean (GOI/Tbp)	Fold change			T-test
		Control 1	1542	1670	1737	1649.67		Control 1	972.3	1128	1029	1043.1	0.63231	Control Mean	0.656506
		Control 2	1215	1205	1306	1242		Control 2	1098	848.4	902.2	949.533	0.76452	Control S.E.M	0.0566827
		Control 3	1639	1637	1561	1612.33		Control 3	843.3	1006	920.8	923.367	0.57269
		FGF9 1	1638	1561	1604	1601		FGF9 1	1354	1182	1237	1257.67	0.785551	FGF9 Mean	0.619313	1.19656	FC Mean	-1.06006	0.712825
		FGF9 2	1932	1832	2154	1972.67		FGF9 2	1147	1122	875.1	1048.03	0.531277	FGF9 S.E.M	0.0700073	-1.23571	FC S.E.M	0.699814
		FGF9 3	1648	1475	1763	1628.67		FGF9 3	1100	1147	1081	1109.33	0.68113			1.03751
		FGF9 4	1586	1505	1743	1611.33		FGF9 4	787.8	642.2	886.9	772.3	0.479293			-1.36974
Fzd8			i	ii	iii	Mean			i	ii	iii	Mean	Relative expression (GOI/Tbp)		Mean (GOI/Tbp)	Fold change			T-test
		Control 1	1542	1670	1737	1649.67		Control 1	1537	1348	1880	1588.33	0.962821	Control Mean	0.91658
		Control 2	1215	1205	1306	1242		Control 2	1422	991.1	1203	1205.37	0.970505	Control S.E.M	0.0501316
		Control 3	1639	1637	1561	1612.33		Control 3	1319	1230	1400	1316.33	0.816415
		FGF9 1	1638	1561	1604	1601		FGF9 1	1446	1301	1501	1416	0.884447	FGF9 Mean	0.822665	-1.03633	FC Mean	-1.11416	0.140446
		FGF9 2	1932	1832	2154	1972.67		FGF9 2	1415	2025	1624	1688	0.855694	FGF9 S.E.M	0.0282771	-1.07115	FC S.E.M	0.0383264
		FGF9 3	1648	1475	1763	1628.67		FGF9 3	1195	1215	1330	1246.67	0.765452			-1.19744
		FGF9 4	1586	1505	1743	1611.33		FGF9 4	1273	1209	1313	1265	0.785064			-1.16752
Fzd10			i	ii	iii	Mean			i	ii	iii	Mean	Relative expression (GOI/Tbp)		Mean (GOI/Tbp)	Fold change			T-test
		Control 1	1542	1670	1737	1649.67		Control 1	1531	1543	1716	1596.67	0.967872	Control Mean	0.893646
		Control 2	1215	1205	1306	1242		Control 2	1068	1113	1163	1114.67	0.897477	Control S.E.M	0.0440024
		Control 3	1639	1637	1561	1612.33		Control 3	1367	1241	1337	1315	0.815588
		FGF9 1	1638	1561	1604	1601		FGF9 1	1400	1597	1676	1557.67	0.972934	FGF9 Mean	0.750348	1.08872	FC Mean	-1.19097	0.196133
		FGF9 2	1932	1832	2154	1972.67		FGF9 2	1273	1322	1274	1289.67	0.653768	FGF9 S.E.M	0.0750249	-1.36692	FC S.E.M	0.60333
		FGF9 3	1648	1475	1763	1628.67		FGF9 3	1206	1100	1146	1150.67	0.706508			-1.26488
		FGF9 4	1586	1505	1743	1611.33		FGF9 4	1051	1067	1112	1076.67	0.668184			-1.33743
Ror1			i	ii	iii	Mean			i	ii	iii	Mean	Relative expression (GOI/Tbp)		Mean (GOI/Tbp)	Fold change			T-test
		Control 1	1542	1670	1737	1649.67		Control 1	1547	1487	1665	1566.33	0.949485	Control Mean	0.930624
		Control 2	1215	1205	1306	1242		Control 2	1099	1010	1220	1109.67	0.893451	Control S.E.M	0.0185869
		Control 3	1639	1637	1561	1612.33		Control 3	1268	1714	1608	1530	0.948935
		FGF9 1	1638	1561	1604	1601		FGF9 1	1625	1927	1718	1756.67	1.09723	FGF9 Mean	0.857874	1.17903	FC Mean	-1.0848	0.559108
		FGF9 2	1932	1832	2154	1972.67		FGF9 2	1383	1405	1667	1485	0.752788	FGF9 S.E.M	0.0974221	-1.23624	FC S.E.M	0.699132
		FGF9 3	1648	1475	1763	1628.67		FGF9 3	1658	1454	1412	1508	0.925911			0.994936
		FGF9 4	1586	1505	1743	1611.33		FGF9 4	1034	1025	1110	1056.33	0.655565			-1.41958
Ror2			i	ii	iii	Mean			i	ii	iii	Mean	Relative expression (GOI/Tbp)		Mean (GOI/Tbp)	Fold change			T-test
		Control 1	1542	1670	1737	1649.67		Control 1	1786	1837	1754	1792.33	1.08648	Control Mean	1.05893
		Control 2	1215	1205	1306	1242		Control 2	1466	1420	1376	1420.67	1.14385	Control S.E.M	0.0586259
		Control 3	1639	1637	1561	1612.33		Control 3	1676	1514	1388	1526	0.946454
		FGF9 1	1638	1561	1604	1601		FGF9 1	2083	2225	2456	2254.67	1.40829	FGF9 Mean	1.16624	1.32991	FC Mean	1.10134	0.539021
		FGF9 2	1932	1832	2154	1972.67		FGF9 2	2707	2364	2287	2452.67	1.24333	FGF9 S.E.M	0.131229	1.17413	FC S.E.M	0.639701
		FGF9 3	1648	1475	1763	1628.67		FGF9 3	1928	2171	1863	1987.33	1.22022			1.15231
		FGF9 4	1586	1505	1743	1611.33		FGF9 4	1280	1346	1208	1278	0.793132			-1.33512
Dkk1			i	ii	iii	Mean			i	ii	iii	Mean	Relative expression (GOI/Tbp)		Mean (GOI/Tbp)	Fold change			T-test
		Control 1	1542	1670	1737	1649.67		Control 1	1962	1812	1835	1869.67	1.13336	Control Mean	1.09621
		Control 2	1215	1205	1306	1242		Control 2	1357	1480	1610	1482.33	1.19351	Control S.E.M	0.0694324
		Control 3	1639	1637	1561	1612.33		Control 3	1514	1562	1576	1550.67	0.961753
		FGF9 1	1638	1561	1604	1601		FGF9 1	2074	2350	2047	2157	1.34728	FGF9 Mean	1.24401	1.22904	FC Mean	1.13483	0.149964
		FGF9 2	1932	1832	2154	1972.67		FGF9 2	2778	2503	2504	2595	1.31548	FGF9 S.E.M	0.0546945	1.20003	FC S.E.M	0.0498943
		FGF9 3	1648	1475	1763	1628.67		FGF9 3	1992	2005	1895	1964	1.20589			1.10006
		FGF9 4	1586	1505	1743	1611.33		FGF9 4	1882	1867	1604	1784.33	1.10736			1.01018
Dkk4			i	ii	iii	Mean			i	ii	iii	Mean	Relative expression (GOI/Tbp)		Mean (GOI/Tbp)	Fold change			T-test
		Control 1	1542	1670	1737	1649.67		Control 1	1927	1956	1853	1912	1.15902	Control Mean	1.00189
		Control 2	1215	1205	1306	1242		Control 2	998.4	1110	1245	1117.8	0.9	Control S.E.M	0.0797102
		Control 3	1639	1637	1561	1612.33		Control 3	1487	1491	1601	1526.33	0.946661
		FGF9 1	1638	1561	1604	1601		FGF9 1	357.3	379.9	398.5	378.567	0.236456	FGF9 Mean	0.203499	-4.23712	FC Mean	-4.92333	0.000106594
		FGF9 2	1932	1832	2154	1972.67		FGF9 2	330.6	307.4	403.7	347.233	0.176022	FGF9 S.E.M	0.0237681	-5.69186	FC S.E.M	0.621271
		FGF9 3	1648	1475	1763	1628.67		FGF9 3	252.1	231.7	254.7	246.167	0.151146			-6.62865
		FGF9 4	1586	1505	1743	1611.33		FGF9 4	426.4	391.9	392	403.433	0.250372			-4.00162

## Sheet: Fig 1D SU5402 treatment
Gene symbol			Tbp quantity (Copies)						GOI quantity (Copies)
Bmp2			i	ii	iii	Mean			i	ii	iii	Mean	Relative expression (GOI/Tbp)		Mean (GOI/Tbp)	Fold change			T-test
		Control 1	3831	3881	3767	3826.33		Control 1	2130	2104	2229	2154.33	0.563028	Control Mean	0.641395
		Control 2	2145	2032	2146	2107.67		Control 2	1945	2074	2044	2021	0.95888	Control S.E.M	0.0844498
		Control 3	4036	4307	4189	4177.33		Control 3	2231	2147	2376	2251.33	0.53894
		Control 4	2100	2182	2025	2102.33		Control 4	1840	1656	1792	1762.67	0.838433
		Control 5	2107	1897	1875	1959.67		Control 5	755.4	933.3	914.5	867.733	0.442796
		Control 6	2159	1925	1827	1970.33		Control 6	1081	859.7	1052	997.567	0.506293
		SU5402 1	2681	2789	2814	2761.33		SU5402 1	4112	4399	4382	4297.67	1.55637	SU5402 Mean	1.27662	2.42654	FC Mean	1.99037	0.00138983
		SU5402 2	3967	3958	4040	3988.33		SU5402 2	4514	4569	4389	4490.67	1.12595	SU5402 S.E.M	0.118138	1.75547	FC S.E.M	0.184189
		SU5402 3	3917	3902	3645	3821.33		SU5402 3	4538	4629	4288	4485	1.17367			1.82988
		SU5402 4	2355	2127	2030	2170.67		SU5402 4	2191	2000	2025	2072	0.954545			1.48823
		SU5402 5	2028	1855	1931	1938		SU5402 5	3335	3317	3273	3308.33	1.70709			2.66152
		SU5402 6	2136	1982	2055	2057.67		SU5402 6	2465	2268	2317	2350	1.14207			1.7806
Bmp4			i	ii	iii	Mean			i	ii	iii	Mean	Relative expression (GOI/Tbp)		Mean (GOI/Tbp)	Fold change			T-test
		Control 1	3831	3881	3767	3826.33		Control 1	2013	2152	2100	2088.33	0.545779	Control Mean	0.637087
		Control 2	2145	2032	2146	2107.67		Control 2	998.1	944.1	1082	1008.07	0.478286	Control S.E.M	0.0753107
		Control 3	4036	4307	4189	4177.33		Control 3	2088	1958	2137	2061	0.493377
		Control 4	2100	2182	2025	2102.33		Control 4	2143	1926	1983	2017.33	0.959569
		Control 5	2107	1897	1875	1959.67		Control 5	1202	1135	1215	1184	0.604184
		Control 6	2159	1925	1827	1970.33		Control 6	1483	1465	1434	1460.67	0.74133
		SU5402 1	2681	2789	2814	2761.33		SU5402 1	926.6	934.6	1046	969.067	0.350942	SU5402 Mean	0.461054	-1.81537	FC Mean	-1.38181	0.124264
		SU5402 2	3967	3958	4040	3988.33		SU5402 2	1303	1217	1318	1279.33	0.320769	SU5402 S.E.M	0.0730273	-1.98613	FC S.E.M	0.224173
		SU5402 3	3917	3902	3645	3821.33		SU5402 3	1119	992	1125	1078.67	0.282275			-2.25697
		SU5402 4	2355	2127	2030	2170.67		SU5402 4	1045	1066	1038	1049.67	0.483569			-1.31747
		SU5402 5	2028	1855	1931	1938		SU5402 5	1416	1428	1488	1444	0.745098			-0.855038
		SU5402 6	2136	1982	2055	2057.67		SU5402 6	1033	1350	1220	1201	0.583671			-1.09152
Rgma			i	ii	iii	Mean			i	ii	iii	Mean	Relative expression (GOI/Tbp)		Mean (GOI/Tbp)	Fold change			T-test
		Control 1	2100	2182	2025	2102.33		Control 1	1141	1018	1037	1065.33	0.506739	Control Mean	0.435898
		Control 2	2107	1897	1875	1959.67		Control 2	836.3	807.3	734.4	792.667	0.404491	Control S.E.M	0.0354961
		Control 3	2159	1925	1827	1970.33		Control 3	806	781.7	755.8	781.167	0.396464
		Control 4						Control 4
		Control 5						Control 5
		Control 6						Control 6
		SU5402 1	2355	2127	2030	2170.67		SU5402 1	702.5	764.6	676.4	714.5	0.329162	SU5402 Mean	0.375431	-1.32427	FC Mean	-1.16106	0.391626
		SU5402 2	2028	1855	1931	1938		SU5402 2	946.6	852.8	987.6	929	0.47936	SU5402 S.E.M	0.0520686	-0.909332	FC S.E.M	0.146864
		SU5402 3	2136	1982	2055	2057.67		SU5402 3	659.8	607.8	694	653.867	0.317771			-1.37174
		SU5402 4						SU5402 4
		SU5402 5						SU5402 5
		SU5402 6						SU5402 6
Rgmb			i	ii	iii	Mean			i	ii	iii	Mean	Relative expression (GOI/Tbp)		Mean (GOI/Tbp)	Fold change			T-test
		Control 1	2145	2032	2146	2107.67		Control 1	305.6	658.9	762.9	575.8	0.273193	Control Mean	0.36831
		Control 2	4036	4307	4189	4177.33		Control 2	1164	1040	1382	1195.33	0.286147	Control S.E.M	0.0460175
		Control 3	2100	2182	2025	2102.33		Control 3	1112	1110	1083	1101.67	0.524021
		Control 4	2107	1897	1875	1959.67		Control 4	803	805.6	809.5	806.033	0.411311
		Control 5	2159	1925	1827	1970.33		Control 5	645.6	678.9	725.9	683.467	0.346879
		Control 6						Control 6
		SU5402 1	2681	2789	2814	2761.33		SU5402 1	1009	1472	1220	1233.67	0.446765	SU5402 Mean	0.387427	1.21301	FC Mean	1.0519	0.762395
		SU5402 2	3967	3958	4040	3988.33		SU5402 2	1160	962.8	1127	1083.27	0.271609	SU5402 S.E.M	0.0408219	0.737446	FC S.E.M	0.110836
		SU5402 3	3917	3902	3645	3821.33		SU5402 3	943.7	1135	1024	1034.23	0.270647			0.734835
		SU5402 4	2355	2127	2030	2170.67		SU5402 4	839.5	788.9	834.3	820.9	0.378179			1.02679
		SU5402 5	2028	1855	1931	1938		SU5402 5	1083	997.3	915.6	998.633	0.515291			1.39907
		SU5402 6	2136	1982	2055	2057.67		SU5402 6	935.8	905.4	887.7	909.633	0.44207			1.20027
Bambi			i	ii	iii	Mean			i	ii	iii	Mean	Relative expression (GOI/Tbp)		Mean (GOI/Tbp)	Fold change			T-test
		Control 1	2100	2182	2025	2102.33		Control 1	1489	1691	1735	1638.33	0.779293	Control Mean	0.711348
		Control 2	2107	1897	1875	1959.67		Control 2	1311	1112	1239	1220.67	0.622895	Control S.E.M	0.0462979
		Control 3	2159	1925	1827	1970.33		Control 3	1253	1633	1440	1442	0.731856
		Control 4						Control 4
		Control 5						Control 5
		Control 6						Control 6
		SU5402 1	2355	2127	2030	2170.67		SU5402 1	1496	1388	1345	1409.67	0.649416	SU5402 Mean	0.613342	-1.09536	FC Mean	-1.15979	0.158648
		SU5402 2	2028	1855	1931	1938		SU5402 2	1330	1180	1225	1245	0.642415	SU5402 S.E.M	0.0326366	-1.1073	FC S.E.M	0.0655199
		SU5402 3	2136	1982	2055	2057.67		SU5402 3	1173	1149	1062	1128	0.548194			-1.29762
		SU5402 4						SU5402 4
		SU5402 5						SU5402 5
		SU5402 6						SU5402 6
Ctgf			i	ii	iii	Mean			i	ii	iii	Mean	Relative expression (GOI/Tbp)		Mean (GOI/Tbp)	Fold change			T-test
		Control 1	2145	2032	2146	2107.67		Control 1	303.9	353.4	335.4	330.9	0.156998	Control Mean	0.323627
		Control 2	4036	4307	4189	4177.33		Control 2	518.1	580.3	556	551.467	0.132014	Control S.E.M	0.078609
		Control 3	2100	2182	2025	2102.33		Control 3	1043	1397	1011	1150.33	0.54717
		Control 4	2107	1897	1875	1959.67		Control 4	815.8	668.6	781.1	755.167	0.385355
		Control 5	2159	1925	1827	1970.33		Control 5	823.7	814.7	705.9	781.433	0.3966
		Control 6						Control 6
		SU5402 1	2681	2789	2814	2761.33		SU5402 1	238.7	225.6	207.9	224.067	0.0811444	SU5402 Mean	0.0974394	-3.98829	FC Mean	-3.32132	0.0126639
		SU5402 2	3967	3958	4040	3988.33		SU5402 2	204.2	199.5	219.7	207.8	0.052102	SU5402 S.E.M	0.0151053	-6.21142	FC S.E.M	0.61516
		SU5402 3	3917	3902	3645	3821.33		SU5402 3	263.8	262.2	275.1	267.033	0.0698796			-4.63121
		SU5402 4	2355	2127	2030	2170.67		SU5402 4	300.4	278.4	308	295.6	0.136179			-2.37648
		SU5402 5	2028	1855	1931	1938		SU5402 5	330.5	252.5	259.6	280.867	0.144926			-2.23305
		SU5402 6	2136	1982	2055	2057.67		SU5402 6	241.3	189.3	189.2	206.6	0.100405			-3.22322
Tsku			i	ii	iii	Mean			i	ii	iii	Mean	Relative expression (GOI/Tbp)		Mean (GOI/Tbp)	Fold change			T-test
		Control 1	3831	3881	3767	3826.33		Control 1	1641	1485	1485	1537	0.40169	Control Mean	0.515008
		Control 2	2145	2032	2146	2107.67		Control 2	1088	1305	1167	1186.67	0.563024	Control S.E.M	0.0415093
		Control 3	4036	4307	4189	4177.33		Control 3	1656	1562	1894	1704	0.407916
		Control 4	2100	2182	2025	2102.33		Control 4	1433	1438	1369	1413.33	0.672269
		Control 5	2107	1897	1875	1959.67		Control 5	1036	973.5	999.7	1003.07	0.511856
		Control 6	2159	1925	1827	1970.33		Control 6	1067	1145	940.3	1050.77	0.533294
		SU5402 1	2681	2789	2814	2761.33		SU5402 1	1198	1407	1392	1332.33	0.482496	SU5402 Mean	0.416806	-1.06738	FC Mean	-1.23561	0.139233
		SU5402 2	3967	3958	4040	3988.33		SU5402 2	1230	1292	958.8	1160.27	0.290915	SU5402 S.E.M	0.044871	-1.7703	FC S.E.M	0.157208
		SU5402 3	3917	3902	3645	3821.33		SU5402 3	990	1125	1106	1073.67	0.280967			-1.83299
		SU5402 4	2355	2127	2030	2170.67		SU5402 4	1124	926.9	958.3	1003.07	0.462101			-1.11449
		SU5402 5	2028	1855	1931	1938		SU5402 5	1197	983.7	1057	1079.23	0.55688			-0.92481
		SU5402 6	2136	1982	2055	2057.67		SU5402 6	908.1	855.9	874.8	879.6	0.427474			-1.20477
Nog			i	ii	iii	Mean			i	ii	iii	Mean	Relative expression (GOI/Tbp)		Mean (GOI/Tbp)	Fold change			T-test
		Control 1	2100	2182	2025	2102.33		Control 1	438.3	528.6	614.2	527.033	0.25069	Control Mean	0.207579
		Control 2	2107	1897	1875	1959.67		Control 2	412.7	357.2	364.7	378.2	0.192992	Control S.E.M	0.0219274
		Control 3	2159	1925	1827	1970.33		Control 3	445.8	255.5	357.1	352.8	0.179056
		Control 4						Control 4
		Control 5						Control 5
		Control 6						Control 6
		SU5402 1	2355	2127	2030	2170.67		SU5402 1	737.9	751.3	729.2	739.467	0.340663	SU5402 Mean	0.296878	1.64112	FC Mean	1.43019	0.173931
		SU5402 2	2028	1855	1931	1938		SU5402 2	698.4	747.8	598.7	681.633	0.35172	SU5402 S.E.M	0.0494169	1.69439	FC S.E.M	0.238063
		SU5402 3	2136	1982	2055	2057.67		SU5402 3	404.3	498	321.5	407.933	0.19825			0.955059
		SU5402 4						SU5402 4
		SU5402 5						SU5402 5
		SU5402 6						SU5402 6
Fgf7			i	ii	iii	Mean			i	ii	iii	Mean	Relative expression (GOI/Tbp)		Mean (GOI/Tbp)	Fold change			T-test
		Control 1	2100	2182	2025	2102.33		Control 1	2598	2066	2381	2348.33	1.11701	Control Mean	0.820266
		Control 2	2107	1897	1875	1959.67		Control 2	1138	947.5	1149	1078.17	0.550179	Control S.E.M	0.164173
		Control 3	2159	1925	1827	1970.33		Control 3	1291	1817	1583	1563.67	0.793605
		Control 4						Control 4
		Control 5						Control 5
		Control 6						Control 6
		SU5402 1	2355	2127	2030	2170.67		SU5402 1	1518	1826	1336	1560	0.718673	SU5402 Mean	0.995688	0.876147	FC Mean	1.21386	0.641105
		SU5402 2	2028	1855	1931	1938		SU5402 2	2744	3471	3142	3119	1.60939	SU5402 S.E.M	0.307335	1.96204	FC S.E.M	0.374677
		SU5402 3	2136	1982	2055	2057.67		SU5402 3	1212	1512	1344	1356	0.658999			0.803397
		SU5402 4						SU5402 4
		SU5402 5						SU5402 5
		SU5402 6						SU5402 6
Fgf9			i	ii	iii	Mean			i	ii	iii	Mean	Relative expression (GOI/Tbp)		Mean (GOI/Tbp)	Fold change			T-test
		Control 1	2100	2182	2025	2102.33		Control 1	2822	1516	2006	2114.67	1.00587	Control Mean	0.780224
		Control 2	2107	1897	1875	1959.67		Control 2	786.7	835.9	1028	883.533	0.450859	Control S.E.M	0.168401
		Control 3	2159	1925	1827	1970.33		Control 3	1640	1871	1714	1741.67	0.883945
		Control 4						Control 4
		Control 5						Control 5
		Control 6						Control 6
		SU5402 1	2355	2127	2030	2170.67		SU5402 1	1761	1784	1381	1642	0.75645	SU5402 Mean	0.866196	0.969529	FC Mean	1.11019	0.73946
		SU5402 2	2028	1855	1931	1938		SU5402 2	2192	2056	2755	2334.33	1.20451	SU5402 S.E.M	0.172598	1.5438	FC S.E.M	0.221216
		SU5402 3	2136	1982	2055	2057.67		SU5402 3	1573	954.1	1409	1312.03	0.637632			0.817242
		SU5402 4						SU5402 4
		SU5402 5						SU5402 5
		SU5402 6						SU5402 6
Fgf10			i	ii	iii	Mean			i	ii	iii	Mean	Relative expression (GOI/Tbp)		Mean (GOI/Tbp)	Fold change			T-test
		Control 1	2145	2032	2146	2107.67		Control 1	2596	2399	2724	2573	1.22078	Control Mean	0.960886
		Control 2	4036	4307	4189	4177.33		Control 2	5542	4670	5189	5133.67	1.22893	Control S.E.M	0.108613
		Control 3	2100	2182	2025	2102.33		Control 3	2087	2373	1612	2024	0.96274
		Control 4	2107	1897	1875	1959.67		Control 4	1063	1646	1141	1283.33	0.654873
		Control 5	2159	1925	1827	1970.33		Control 5	1729	1254	1374	1452.33	0.7371
		Control 6						Control 6
		SU5402 1	2681	2789	2814	2761.33		SU5402 1	3992	3925	4665	4194	1.51883	SU5402 Mean	0.988432	1.58066	FC Mean	1.02867	0.895611
		SU5402 2	3967	3958	4040	3988.33		SU5402 2	4103		5531	4817	1.20777	SU5402 S.E.M	0.156995	1.25694	FC S.E.M	0.163385
		SU5402 3	3917	3902	3645	3821.33		SU5402 3	4339	4330	4787	4485.33	1.17376			1.22154
		SU5402 4	2355	2127	2030	2170.67		SU5402 4	743.4	1133	1051	975.8	0.449539			0.467838
		SU5402 5	2028	1855	1931	1938		SU5402 5	1456	1804	1673	1644.33	0.848469			0.883007
		SU5402 6	2136	1982	2055	2057.67		SU5402 6	1531	1436	1553	1506.67	0.732221			0.762027
Fgf18			i	ii	iii	Mean			i	ii	iii	Mean	Relative expression (GOI/Tbp)		Mean (GOI/Tbp)	Fold change			T-test
		Control 1	2100	2182	2025	2102.33		Control 1	4986	4095	5005	4695.33	2.23339	Control Mean	2.273
		Control 2	2107	1897	1875	1959.67		Control 2	2916	3737	2987	3213.33	1.63973	Control S.E.M	0.377567
		Control 3	2159	1925	1827	1970.33		Control 3	5327	6180	5906	5804.33	2.94586
		Control 4						Control 4
		Control 5						Control 5
		Control 6						Control 6
		SU5402 1	2355	2127	2030	2170.67		SU5402 1	6536	7307	7201	7014.67	3.23157	SU5402 Mean	3.39743	1.42172	FC Mean	1.49469	0.0501781
		SU5402 2	2028	1855	1931	1938		SU5402 2	6658	7077	7733	7156	3.69247	SU5402 S.E.M	0.147896	1.62449	FC S.E.M	0.0650664
		SU5402 3	2136	1982	2055	2057.67		SU5402 3	7265	6466	6444	6725	3.26827			1.43787
		SU5402 4						SU5402 4
		SU5402 5						SU5402 5
		SU5402 6						SU5402 6
Fgf20			i	ii	iii	Mean			i	ii	iii	Mean	Relative expression (GOI/Tbp)		Mean (GOI/Tbp)	Fold change			T-test
		Control 1	3831	3881	3767	3826.33		Control 1	4024	4578	5331	4644.33	1.21378	Control Mean	1.09056
		Control 2	2145	2032	2146	2107.67		Control 2	3192	3558	3911	3553.67	1.68607	Control S.E.M	0.149302
		Control 3	4036	4307	4189	4177.33		Control 3	4986	4073	4691	4583.33	1.09719
		Control 4	2100	2182	2025	2102.33		Control 4	2462	2306	2245	2337.67	1.11194
		Control 5	2107	1897	1875	1959.67		Control 5	1381	1058	1195	1211.33	0.618132
		Control 6	2159	1925	1827	1970.33		Control 6	1527	1750	1548	1608.33	0.816275
		SU5402 1	2681	2789	2814	2761.33		SU5402 1	23030	25520	28300	25616.7	9.27692	SU5402 Mean	7.03328	8.50653	FC Mean	6.44921	0.00140865
		SU5402 2	3967	3958	4040	3988.33		SU5402 2	26220	25680	30260	27386.7	6.86669	SU5402 S.E.M	1.35303	6.29646	FC S.E.M	1.24067
		SU5402 3	3917	3902	3645	3821.33		SU5402 3	42280	53180		47730	12.4904			11.4532
		SU5402 4	2355	2127	2030	2170.67		SU5402 4	10990	10530	10820	10780	4.96622			4.5538
		SU5402 5	2028	1855	1931	1938		SU5402 5	10100	9831	8883	9604.67	4.95597			4.54441
		SU5402 6	2136	1982	2055	2057.67		SU5402 6	7865	6656	7970	7497	3.64345			3.34088
Wnt5b			i	ii	iii	Mean			i	ii	iii	Mean	Relative expression (GOI/Tbp)		Mean (GOI/Tbp)	Fold change			T-test
		Control 1	2145	2032	2146	2107.67		Control 1	1416	1485	1341	1414	0.670884	Control Mean	0.822002
		Control 2	2100	2182	2025	2102.33		Control 2	1786	1855	1570	1737	0.826225	Control S.E.M	0.0680541
		Control 3	2107	1897	1875	1959.67		Control 3	2114	1925	1841	1960	1.00017
		Control 4	2159	1925	1827	1970.33		Control 4	1644	1387	1643	1558	0.790729
		Control 5						Control 5
		Control 6						Control 6
		SU5402 1	2681	2789	2814	2761.33		SU5402 1	1602	1968	1937	1835.67	0.664775	SU5402 Mean	0.768381	-1.23651	FC Mean	-1.06979	0.670874
		SU5402 2	3967	3958	4040	3988.33		SU5402 2	3109	2153	2849	2703.67	0.677894	SU5402 S.E.M	0.0872269	-1.21258	FC S.E.M	0.105573
		SU5402 3	3917	3902	3645	3821.33		SU5402 3	2262	2373	1930	2188.33	0.572662			-1.4354
		SU5402 4	2355	2127	2030	2170.67		SU5402 4	1177	1722	1427	1442	0.664312			-1.23737
		SU5402 5	2028	1855	1931	1938		SU5402 5	2233	2356	2118	2235.67	1.15359			-0.712557
		SU5402 6	2136	1982	2055	2057.67		SU5402 6	2144	1562	1708	1804.67	0.877045			-0.93724
Wnt9a			i	ii	iii	Mean			i	ii	iii	Mean	Relative expression (GOI/Tbp)		Mean (GOI/Tbp)	Fold change			T-test
		Control 1	2145	2032	2146	2107.67		Control 1	2023	2352	2096	2157	1.02341	Control Mean	1.52838
		Control 2	2100	2182	2025	2102.33		Control 2	3044	3465	3880	3463	1.64722	Control S.E.M	0.181122
		Control 3	2107	1897	1875	1959.67		Control 3	3173	2813	3205	3063.67	1.56336
		Control 4	2159	1925	1827	1970.33		Control 4	3502	4141	3467	3703.33	1.87955
		Control 5						Control 5
		Control 6						Control 6
		SU5402 1	2681	2789	2814	2761.33		SU5402 1	2282	2276	2659	2405.67	0.871197	SU5402 Mean	1.33057	-1.75435	FC Mean	-1.14867	0.55896
		SU5402 2	3967	3958	4040	3988.33		SU5402 2	3837	3344	2786	3322.33	0.833013	SU5402 S.E.M	0.232903	-1.83476	FC S.E.M	0.210576
		SU5402 3	3917	3902	3645	3821.33		SU5402 3	3252	3229	3409	3296.67	0.862701			-1.77163
		SU5402 4	2355	2127	2030	2170.67		SU5402 4	2840	3116	3254	3070	1.41431			-1.08065
		SU5402 5	2028	1855	1931	1938		SU5402 5	4075	3993	4425	4164.33	2.14878			-0.71128
		SU5402 6	2136	1982	2055	2057.67		SU5402 6	4078	3896	3467	3813.67	1.85339			-0.82464
Fzd1			i	ii	iii	Mean			i	ii	iii	Mean	Relative expression (GOI/Tbp)		Mean (GOI/Tbp)	Fold change			T-test
		Control 1	2100	2182	2025	2102.33		Control 1	1641	1509	1587	1579	0.75107	Control Mean	0.657579
		Control 2	2107	1897	1875	1959.67		Control 2	1311	1304	1293	1302.67	0.664739	Control S.E.M	0.0561583
		Control 3	2159	1925	1827	1970.33		Control 3	1142	1072	1078	1097.33	0.556928
		Control 4						Control 4
		Control 5						Control 5
		Control 6						Control 6
		SU5402 1	2355	2127	2030	2170.67		SU5402 1	1282	1373	1247	1300.67	0.599201	SU5402 Mean	0.673874	0.911224	FC Mean	1.02478	0.859101
		SU5402 2	2028	1855	1931	1938		SU5402 2	1632	1542	1500	1558	0.803922	SU5402 S.E.M	0.0652618	1.22255	FC S.E.M	0.0992456
		SU5402 3	2136	1982	2055	2057.67		SU5402 3	1373	1223	1222	1272.67	0.6185			0.940571
		SU5402 4						SU5402 4
		SU5402 5						SU5402 5
		SU5402 6						SU5402 6
Fzd2			i	ii	iii	Mean			i	ii	iii	Mean	Relative expression (GOI/Tbp)		Mean (GOI/Tbp)	Fold change			T-test
		Control 1	2100	2182	2025	2102.33		Control 1	2572	2314	2331	2405.67	1.14428	Control Mean	1.1339
		Control 2	2107	1897	1875	1959.67		Control 2	1828	1897	1892	1872.33	0.955435	Control S.E.M	0.100174
		Control 3	2159	1925	1827	1970.33		Control 3	2453	2613	2630	2565.33	1.30198
		Control 4						Control 4
		Control 5						Control 5
		Control 6						Control 6
		SU5402 1	2355	2127	2030	2170.67		SU5402 1	2289	2240	2171	2233.33	1.02887	SU5402 Mean	1.12469	-1.10208	FC Mean	-1.00819	0.960507
		SU5402 2	2028	1855	1931	1938		SU5402 2	2874	2642	2661	2725.67	1.40643	SU5402 S.E.M	0.143253	-0.806224	FC S.E.M	0.120193
		SU5402 3	2136	1982	2055	2057.67		SU5402 3	2052	1822	1921	1931.67	0.938766			-1.20786
		SU5402 4						SU5402 4
		SU5402 5						SU5402 5
		SU5402 6						SU5402 6
Fzd4			i	ii	iii	Mean			i	ii	iii	Mean	Relative expression (GOI/Tbp)		Mean (GOI/Tbp)	Fold change			T-test
		Control 1	2100	2182	2025	2102.33		Control 1	2251	1976	1957	2061.33	0.980498	Control Mean	0.847233
		Control 2	2107	1897	1875	1959.67		Control 2	1338	976.3	1169	1161.1	0.592499	Control S.E.M	0.127413
		Control 3	2159	1925	1827	1970.33		Control 3	1713	2085	1928	1908.67	0.968702
		Control 4						Control 4
		Control 5						Control 5
		Control 6						Control 6
		SU5402 1	2355	2127	2030	2170.67		SU5402 1	1039	871.8	1177	1029.27	0.474171	SU5402 Mean	0.588899	-1.78677	FC Mean	-1.43867	0.153025
		SU5402 2	2028	1855	1931	1938		SU5402 2	1634	1139	1434	1402.33	0.723598	SU5402 S.E.M	0.0726925	-1.17086	FC S.E.M	0.17783
		SU5402 3	2136	1982	2055	2057.67		SU5402 3	1159	1352	1001	1170.67	0.568929			-1.48917
		SU5402 4						SU5402 4
		SU5402 5						SU5402 5
		SU5402 6						SU5402 6
Fzd7			i	ii	iii	Mean			i	ii	iii	Mean	Relative expression (GOI/Tbp)		Mean (GOI/Tbp)	Fold change		Fold change error	T-test
		Control 1	2100	2182	2025	2102.33		Control 1	3246	3197	3689	3377.33	1.60647	Control Mean	1.26306
		Control 2	2107	1897	1875	1959.67		Control 2	1988	1682	1674	1781.33	0.908998	Control S.E.M	0.201413
		Control 3	2159	1925	1827	1970.33		Control 3	2424	2608	2497	2509.67	1.27373
		Control 4						Control 4
		Control 5						Control 5
		Control 6						Control 6
		SU5402 1	2355	2127	2030	2170.67		SU5402 1	1947	1841	1884	1890.67	0.871007	SU5402 Mean	1.33364	0.689598	FC Mean	1.05588	0.8756
		SU5402 2	2028	1855	1931	1938		SU5402 2	4392	3921	3720	4011	2.06966	SU5402 S.E.M	0.372041	1.6386	FC S.E.M	0.294555
		SU5402 3	2136	1982	2055	2057.67		SU5402 3	2432	2115	1998	2181.67	1.06026			0.839436
		SU5402 4						SU5402 4
		SU5402 5						SU5402 5
		SU5402 6						SU5402 6
Fzd8			i	ii	iii	Mean			i	ii	iii	Mean	Relative expression (GOI/Tbp)		Mean (GOI/Tbp)	Fold change		Fold change error	T-test
		Control 1	2100	2182	2025	2102.33		Control 1	1983	2212	2118	2104.33	1.00095	Control Mean	0.880809
		Control 2	2107	1897	1875	1959.67		Control 2	1589	1486	1658	1577.67	0.805069	Control S.E.M	0.0607485
		Control 3	2159	1925	1827	1970.33		Control 3	1470	1697	1777	1648	0.836407
		Control 4						Control 4
		Control 5						Control 5
		Control 6						Control 6
		SU5402 1	2355	2127	2030	2170.67		SU5402 1	2010	1840	1798	1882.67	0.867322	SU5402 Mean	0.966792	0.984688	FC Mean	1.09762	0.572455
		SU5402 2	2028	1855	1931	1938		SU5402 2	2533	2321	2224	2359.33	1.21741	SU5402 S.E.M	0.126192	1.38215	FC S.E.M	0.143268
		SU5402 3	2136	1982	2055	2057.67		SU5402 3	1514	1710	1811	1678.33	0.815649			0.926022
		SU5402 4						SU5402 4
		SU5402 5						SU5402 5
		SU5402 6						SU5402 6
Fzd10			i	ii	iii	Mean			i	ii	iii	Mean	Relative expression (GOI/Tbp)		Mean (GOI/Tbp)	Fold change		Fold change error	T-test
		Control 1	3831	3881	3767	3826.33		Control 1	2495	2193	2263	2317	0.605541	Control Mean	0.624353
		Control 2	2145	2032	2146	2107.67		Control 2	1165	1156	1293	1204.67	0.571564	Control S.E.M	0.045347
		Control 3	4036	4307	4189	4177.33		Control 3	2947	3045	2694	2895.33	0.693106
		Control 4	2100	2182	2025	2102.33		Control 4	1729	1689	1696	1704.67	0.810845
		Control 5	2107	1897	1875	1959.67		Control 5	931.1	1011	994.5	978.867	0.499507
		Control 6	2159	1925	1827	1970.33		Control 6	1071	1099	1173	1114.33	0.565556
		SU5402 1	2681	2789	2814	2761.33		SU5402 1	819	996.1	832.8	882.633	0.31964	SU5402 Mean	0.477739	-1.9533	FC Mean	-1.30689	0.0792159
		SU5402 2	3967	3958	4040	3988.33		SU5402 2	1922	1944	2095	1987	0.498203	SU5402 S.E.M	0.0597775	-1.25321	FC S.E.M	0.152756
		SU5402 3	3917	3902	3645	3821.33		SU5402 3	1887	1566	1614	1689	0.441992			-1.41259
		SU5402 4	2355	2127	2030	2170.67		SU5402 4	1035	999.5	1057	1030.5	0.474739			-1.31515
		SU5402 5	2028	1855	1931	1938		SU5402 5	1548	1380	1410	1446	0.74613			-0.836788
		SU5402 6	2136	1982	2055	2057.67		SU5402 6	870.7	787.2	723.2	793.7	0.385728			-1.61863
Ror1			i	ii	iii	Mean			i	ii	iii	Mean	Relative expression (GOI/Tbp)		Mean (GOI/Tbp)	Fold change		Fold change error	T-test
		Control 1	2100	2182	2025	2102.33		Control 1	12860	13910	11160	12643.3	6.01395	Control Mean	5.11586
		Control 2	2107	1897	1875	1959.67		Control 2	6957	4675	6401	6011	3.06736	Control S.E.M	1.02684
		Control 3	2159	1925	1827	1970.33		Control 3	10830	12850	13360	12346.7	6.26628
		Control 4						Control 4
		Control 5						Control 5
		Control 6						Control 6
		SU5402 1	2355	2127	2030	2170.67		SU5402 1	6978	7875	7980	7611	3.5063	SU5402 Mean	5.69848	0.685377	FC Mean	1.11388	0.727126
		SU5402 2	2028	1855	1931	1938		SU5402 2	11170	13060	11170	11800	6.08875	SU5402 S.E.M	1.1694	1.19017	FC S.E.M	0.228582
		SU5402 3	2136	1982	2055	2057.67		SU5402 3	14140	17110	15050	15433.3	7.5004			1.46611
		SU5402 4						SU5402 4
		SU5402 5						SU5402 5
		SU5402 6						SU5402 6
Ror2			i	ii	iii	Mean			i	ii	iii	Mean	Relative expression (GOI/Tbp)		Mean (GOI/Tbp)	Fold change		Fold change error	T-test
		Control 1	2100	2182	2025	2102.33		Control 1	3723	3814	3707	3748	1.78278	Control Mean	1.41485
		Control 2	2107	1897	1875	1959.67		Control 2	2031	2016	2310	2119	1.08131	Control S.E.M	0.203227
		Control 3	2159	1925	1827	1970.33		Control 3	2664	2853	2643	2720	1.38048
		Control 4						Control 4
		Control 5						Control 5
		Control 6						Control 6
		SU5402 1	2355	2127	2030	2170.67		SU5402 1	1861	1689	2008	1852.67	0.853501	SU5402 Mean	1.30673	-1.65771	FC Mean	-1.08275	0.769716
		SU5402 2	2028	1855	1931	1938		SU5402 2	3860	3240	3453	3517.67	1.8151	SU5402 S.E.M	0.278956	-0.779491	FC S.E.M	0.255216
		SU5402 3	2136	1982	2055	2057.67		SU5402 3	2539	2495	2692	2575.33	1.25158			-1.13046
		SU5402 4						SU5402 4
		SU5402 5						SU5402 5
		SU5402 6						SU5402 6
Dkk1			i	ii	iii	Mean			i	ii	iii	Mean	Relative expression (GOI/Tbp)		Mean (GOI/Tbp)	Fold change		Fold change error	T-test
		Control 1	3831	3881	3767	3826.33		Control 1	1890	1829	1776	1831.67	0.4787	Control Mean	0.515851
		Control 2	2145	2032	2146	2107.67		Control 2	1495	1382	1555	1477.33	0.700933	Control S.E.M	0.0445953
		Control 3	4036	4307	4189	4177.33		Control 3	1329	1722	1795	1615.33	0.38669
		Control 4	2100	2182	2025	2102.33		Control 4	1048	1188	847.8	1027.93	0.488949
		Control 5	2107	1897	1875	1959.67		Control 5	1015	1253	1126	1131.33	0.577309
		Control 6	2159	1925	1827	1970.33		Control 6	775.5	1023	935.5	911.333	0.462527
		SU5402 1	2681	2789	2814	2761.33		SU5402 1	128.2	124.4	163.2	138.6	0.0501931	SU5402 Mean	0.0753392	-10.2773	FC Mean	-6.84706	2.76327e-06
		SU5402 2	3967	3958	4040	3988.33		SU5402 2	283.1	205.4	238.6	242.367	0.0607689	SU5402 S.E.M	0.0142126	-8.48874	FC S.E.M	1.18664
		SU5402 3	3917	3902	3645	3821.33		SU5402 3	177.5	216.7	252.7	215.633	0.0564288			-9.14163
		SU5402 4	2355	2127	2030	2170.67		SU5402 4	285.3	294	269.1	282.8	0.130283			-3.95948
		SU5402 5	2028	1855	1931	1938		SU5402 5	211	227.3	186.4	208.233	0.107448			-4.80096
		SU5402 6	2136	1982	2055	2057.67		SU5402 6	112.7	86.34	90.56	96.5333	0.046914			-10.9957
Dkk4			i	ii	iii	Mean			i	ii	iii	Mean	Relative expression (GOI/Tbp)		Mean (GOI/Tbp)	Fold change		Fold change error	T-test
		Control 1	3831	3881	3767	3826.33		Control 1	2739	2787	2848	2791.33	0.729506	Control Mean	0.753254
		Control 2	2145	2032	2146	2107.67		Control 2	1829	1781	1830	1813.33	0.860351	Control S.E.M	0.0609659
		Control 3	4036	4307	4189	4177.33		Control 3	2385	2104	2065	2184.67	0.522981
		Control 4	2100	2182	2025	2102.33		Control 4	1696	1624	1642	1654	0.786745
		Control 5	2107	1897	1875	1959.67		Control 5	1255	1319	1368	1314	0.670522
		Control 6	2159	1925	1827	1970.33		Control 6	1896	1823	1893	1870.67	0.949416
		SU5402 1	2681	2789	2814	2761.33		SU5402 1	82.7	78.77	76.18	79.2167	0.0286878	SU5402 Mean	0.0577519	-26.2569	FC Mean	-13.0429	7.43172e-07
		SU5402 2	3967	3958	4040	3988.33		SU5402 2	59.98	61.25	58.94	60.0567	0.0150581	SU5402 S.E.M	0.0196303	-50.0232	FC S.E.M	9.99061
		SU5402 3	3917	3902	3645	3821.33		SU5402 3	36.63	48.72	48.09	44.48	0.0116399			-64.713
		SU5402 4	2355	2127	2030	2170.67		SU5402 4	237.8	251.4	257.1	248.767	0.114604			-6.57268
		SU5402 5	2028	1855	1931	1938		SU5402 5	210.9	225.5	244.9	227.1	0.117183			-6.42803
		SU5402 6	2136	1982	2055	2057.67		SU5402 6	127	106.6	132.7	122.1	0.0593391			-12.6941

## Sheet: Fig 1D CHIR treatment
Gene symbol			Tbp quantity (Copies)						GOI quantity (Copies)
Bmp2			i	ii	iii	Mean			i	ii	iii	Mean	Relative expression (GOI/Tbp)		Mean (GOI/Tbp)	Fold change			T-test
		Control 1	2081	1889	2098	2022.67		Control 1	2180	2244	2360	2261.33	1.118	Control Mean	1.48296
		Control 2	2465	2529	2425	2473		Control 2	2172	2165	2330	2222.33	0.898639	Control S.E.M	0.107055
		Control 3	2796	2447	2327	2523.33		Control 3	3214	3442	3388	3348	1.32682
		Control 4	1518	1517	1508	1514.33		Control 4	3921	3704	4134	3919.67	2.58838
		CHIR 1	3013	3031	3008	3017.33		CHIR 1	22320	22250	22720	22430	7.43372	CHIR Mean	4.98157	5.01277	FC Mean	3.35921	0.0113782
		CHIR2	3440	3450	3599	3496.33		CHIR2	14170	14520	13580	14090	4.02994	CHIR S.E.M	1.09505	2.7175	FC S.E.M	0.738422
		CHIR 3	2835	3204	2991	3010		CHIR 3	9976	9863	10360	10066.3	3.3443			2.25515
		CHIR 4	3358	3945	3685	3662.67		CHIR 4	17990	19530	18720	18746.7	5.11831			3.45142
Bmp4			i	ii	iii	Mean			i	ii	iii	Mean	Relative expression (GOI/Tbp)		Mean (GOI/Tbp)	Fold change			T-test
		Control 1	2081	1889	2098	2022.67		Control 1	1814	1850	1838	1834	0.906724	Control Mean	0.997675
		Control 2	2465	2529	2425	2473		Control 2	2238	2441	2600	2426.33	0.98113	Control S.E.M	0.0359437
		Control 3	2796	2447	2327	2523.33		Control 3	2136	2013	2190	2113	0.837384
		Control 4	1518	1517	1508	1514.33		Control 4	1934	1809	2006	1916.33	1.26546
		CHIR 1	3013	3031	3008	3017.33		CHIR 1	11240	11670	12410	11773.3	3.9019	CHIR Mean	3.64167	3.91099	FC Mean	3.65016	0.00143738
		CHIR2	3440	3450	3599	3496.33		CHIR2	10990	11710	12460	11720	3.35208	CHIR S.E.M	0.340589	3.35989	FC S.E.M	0.341382
		CHIR 3	2835	3204	2991	3010		CHIR 3	7771	7827	7406	7668	2.54751			2.55344
		CHIR 4	3358	3945	3685	3662.67		CHIR 4	17410	18100	16850	17453.3	4.7652			4.7763
Rgma			i	ii	iii	Mean			i	ii	iii	Mean	Relative expression (GOI/Tbp)		Mean (GOI/Tbp)	Fold change			T-test
		Control 1	2081	1889	2098	2022.67		Control 1	2116	2191	2096	2134.33	1.05521	Control Mean	1.66839
		Control 2	2465	2529	2425	2473		Control 2	4003	3859	3725	3862.33	1.5618	Control S.E.M	0.299103
		Control 3	2796	2447	2327	2523.33		Control 3	5620	5430	5961	5670.33	2.24716
		Control 4	1518	1517	1508	1514.33		Control 4	2678	2907	2635	2740	1.80938
		CHIR 1	3013	3031	3008	3017.33		CHIR 1	4049	4044	4381	4158	1.37804	CHIR Mean	1.71682	0.825971	FC Mean	1.02903	0.872495
		CHIR2	3440	3450	3599	3496.33		CHIR2	6149	6419	6083	6217	1.77815	CHIR S.E.M	0.177027	1.06579	FC S.E.M	0.106107
		CHIR 3	2835	3204	2991	3010		CHIR 3	6083	6396	6340	6273	2.08405			1.24914
		CHIR 4	3358	3945	3685	3662.67		CHIR 4	5765	6166	5947	5959.33	1.62705			0.975222
Rgmb			i	ii	iii	Mean			i	ii	iii	Mean	Relative expression (GOI/Tbp)		Mean (GOI/Tbp)	Fold change			T-test
		Control 1	2081	1889	2098	2022.67		Control 1	2629	2442	2545	2538.67	1.25511	Control Mean	1.52822
		Control 2	2465	2529	2425	2473		Control 2	2637	2698	2429	2588	1.0465	Control S.E.M	0.143773
		Control 3	2796	2447	2327	2523.33		Control 3	4133	3872	4220	4075	1.61493
		Control 4	1518	1517	1508	1514.33		Control 4	3478	3306	3194	3326	2.19635
		CHIR 1	3013	3031	3008	3017.33		CHIR 1	3122	2931	2937	2996.67	0.993151	CHIR Mean	1.05504	-1.53876	FC Mean	-1.4485	0.113417
		CHIR2	3440	3450	3599	3496.33		CHIR2	3809	3760	3811	3793.33	1.08495	CHIR S.E.M	0.0427271	-1.40857	FC S.E.M	0.0566563
		CHIR 3	2835	3204	2991	3010		CHIR 3	3675	3436	3399	3503.33	1.1639			-1.31302
		CHIR 4	3358	3945	3685	3662.67		CHIR 4	3842	3570	3336	3582.67	0.978158			-0.668967
Bambi			i	ii	iii	Mean			i	ii	iii	Mean	Relative expression (GOI/Tbp)		Mean (GOI/Tbp)	Fold change			T-test
		Control 1	2081	1889	2098	2022.67		Control 1	1932	2106	1972	2003.33	0.990442	Control Mean	1.71643
		Control 2	2465	2529	2425	2473		Control 2	5089	4970	5603	5220.67	2.11107	Control S.E.M	0.313318
		Control 3	2796	2447	2327	2523.33		Control 3	5039	5136	5243	5139.33	2.03672
		Control 4	1518	1517	1508	1514.33		Control 4	2474	2518	2856	2616	1.72749
		CHIR 1	3013	3031	3008	3017.33		CHIR 1	8102	7901	7912	7971.67	2.64196	CHIR Mean	2.72213	1.53922	FC Mean	1.58593	0.00818651
		CHIR2	3440	3450	3599	3496.33		CHIR2	9934	10330	9382	9882	2.82639	CHIR S.E.M	0.0464555	1.64667	FC S.E.M	0.0270652
		CHIR 3	2835	3204	2991	3010		CHIR 3	8153	8607	8107	8289	2.75382			1.60439
		CHIR 4	3358	3945	3685	3662.67		CHIR 4	10020	10020	9258	9766	2.66636			1.55343
Ctgf			i	ii	iii	Mean			i	ii	iii	Mean	Relative expression (GOI/Tbp)		Mean (GOI/Tbp)	Fold change			T-test
		Control 1	2081	1889	2098	2022.67		Control 1	772.9	939.1	916	876	0.433092	Control Mean	0.937061
		Control 2	2465	2529	2425	2473		Control 2	2291	2428	2367	2362	0.955115	Control S.E.M	0.138342
		Control 3	2796	2447	2327	2523.33		Control 3	2094	2049	2315	2152.67	0.853104
		Control 4	1518	1517	1508	1514.33		Control 4	2320	2076	2450	2282	1.50693
		CHIR 1	3013	3031	3008	3017.33		CHIR 1	1463	1603	1434	1500	0.497128	CHIR Mean	0.313349	-1.88495	FC Mean	-2.99047	0.0348756
		CHIR2	3440	3450	3599	3496.33		CHIR2	727.8	903.4	1062	897.733	0.256764	CHIR S.E.M	0.0757737	-3.6495	FC S.E.M	0.628374
		CHIR 3	2835	3204	2991	3010		CHIR 3	679.9	635.1	644.9	653.3	0.217043			-4.3174
		CHIR 4	3358	3945	3685	3662.67		CHIR 4	1027	970.7	1106	1034.57	0.282463			-3.77808
Tsku			i	ii	iii	Mean			i	ii	iii	Mean	Relative expression (GOI/Tbp)		Mean (GOI/Tbp)	Fold change			T-test
		Control 1	2081	1889	2098	2022.67		Control 1	1215	1381	1300	1298.67	0.642057	Control Mean	0.898715
		Control 2	2465	2529	2425	2473		Control 2	2555	2415	2347	2439	0.986252	Control S.E.M	0.108587
		Control 3	2796	2447	2327	2523.33		Control 3	2752	2532	2616	2633.33	1.04359
		Control 4	1518	1517	1508	1514.33		Control 4	1504	1348	1341	1397.67	0.922958
		CHIR 1	3013	3031	3008	3017.33		CHIR 1	4297	4076	3786	4053	1.34324	CHIR Mean	1.39126	1.49462	FC Mean	1.54805	0.00207484
		CHIR2	3440	3450	3599	3496.33		CHIR2	4767	4818	4297	4627.33	1.32348	CHIR S.E.M	0.0308876	1.47264	FC S.E.M	0.0343686
		CHIR 3	2835	3204	2991	3010		CHIR 3	4406	4485	4103	4331.33	1.43898			1.60115
		CHIR 4	3358	3945	3685	3662.67		CHIR 4	5462	5562	5011	5345	1.45932			1.62378
Nog			i	ii	iii	Mean			i	ii	iii	Mean	Relative expression (GOI/Tbp)		Mean (GOI/Tbp)	Fold change			T-test
		Control 1	2081	1889	2098	2022.67		Control 1	755.8	616.5	744.4	705.567	0.34883	Control Mean	0.587912
		Control 2	2465	2529	2425	2473		Control 2	1793	2044	1832	1889.67	0.764119	Control S.E.M	0.112286
		Control 3	2796	2447	2327	2523.33		Control 3	1982	1654	1698	1778	0.704624
		Control 4	1518	1517	1508	1514.33		Control 4	787.3	827.6	811.4	808.767	0.534074
		CHIR 1	3013	3031	3008	3017.33		CHIR 1	1671	2039	2147	1952.33	0.647039	CHIR Mean	0.902594	1.10057	FC Mean	1.53526	0.0584547
		CHIR2	3440	3450	3599	3496.33		CHIR2	3453	3768	3485	3568.67	1.02069	CHIR S.E.M	0.11792	1.73613	FC S.E.M	0.200575
		CHIR 3	2835	3204	2991	3010		CHIR 3	2963	3382	3436	3260.33	1.08317			1.8424
		CHIR 4	3358	3945	3685	3662.67		CHIR 4	3264	3213	2967	3148	0.859483			1.46193
Fgf7			i	ii	iii	Mean			i	ii	iii	Mean	Relative expression (GOI/Tbp)		Mean (GOI/Tbp)	Fold change			T-test
		Control 1	2081	1889	2098	2022.67		Control 1	1130	1110	1153	1131	0.559163	Control Mean	0.703959
		Control 2	2465	2529	2425	2473		Control 2	1799	1615	1649	1687.67	0.682437	Control S.E.M	0.0503932
		Control 3	2796	2447	2327	2523.33		Control 3	1903	1827	2015	1915	0.758917
		Control 4	1518	1517	1508	1514.33		Control 4	1143	1237	1324	1234.67	0.81532
		CHIR 1	3013	3031	3008	3017.33		CHIR 1	630.2	661.7	525.1	605.667	0.200729	CHIR Mean	0.285583	-3.50701	FC Mean	-2.46499	0.00105014
		CHIR2	3440	3450	3599	3496.33		CHIR2	944	919.4	986	949.8	0.271656	CHIR S.E.M	0.0531155	-2.59136	FC S.E.M	0.447169
		CHIR 3	2835	3204	2991	3010		CHIR 3	1237	1254	1208	1233	0.409635			-1.71851
		CHIR 4	3358	3945	3685	3662.67		CHIR 4	1019	1079	762.3	953.433	0.260311			-5.45707
Fgf9			i	ii	iii	Mean			i	ii	iii	Mean	Relative expression (GOI/Tbp)		Mean (GOI/Tbp)	Fold change			T-test
		Control 1	2081	1889	2098	2022.67		Control 1	2306	2453	1887	2215.33	1.09525	Control Mean	1.43652
		Control 2	2465	2529	2425	2473		Control 2	3196	3492	3661	3449.67	1.39493	Control S.E.M	0.114906
		Control 3	2796	2447	2327	2523.33		Control 3	3806	3891	4013	3903.33	1.5469
		Control 4	1518	1517	1508	1514.33		Control 4	2365	2794	2605	2588	1.709
		CHIR 1	3013	3031	3008	3017.33		CHIR 1	5575	5329	4658	5187.33	1.71918	CHIR Mean	2.05028	1.19676	FC Mean	1.42725	0.0244792
		CHIR2	3440	3450	3599	3496.33		CHIR2	7008	8312	7858	7726	2.20974	CHIR S.E.M	0.178265	1.53826	FC S.E.M	0.124095
		CHIR 3	2835	3204	2991	3010		CHIR 3	7786	6907	7093	7262	2.41262			1.67949
		CHIR 4	3358	3945	3685	3662.67		CHIR 4	7134	7063	6236	6811	1.85957			1.2945
Fgf10			i	ii	iii	Mean			i	ii	iii	Mean	Relative expression (GOI/Tbp)		Mean (GOI/Tbp)	Fold change			T-test
		Control 1	2081	1889	2098	2022.67		Control 1	1693	1804	1591	1696	0.838497	Control Mean	0.895734
		Control 2	2465	2529	2425	2473		Control 2	1562	1662	1863	1695.67	0.685672	Control S.E.M	0.0385671
		Control 3	2796	2447	2327	2523.33		Control 3	1968	2083	1856	1969	0.780317
		Control 4	1518	1517	1508	1514.33		Control 4	2112	1760		1936	1.27845
		CHIR 1	3013	3031	3008	3017.33		CHIR 1	443.9	398.1	334.6	392.2	0.129982	CHIR Mean	0.132233	-6.8912	FC Mean	-6.7739	0.00122062
		CHIR2	3440	3450	3599	3496.33		CHIR2	272.8	377.9	427.5	359.4	0.102793	CHIR S.E.M	0.0232321	-8.71393	FC S.E.M	1.02221
		CHIR 3	2835	3204	2991	3010		CHIR 3	555.8	560	630.1	581.967	0.193344			-4.63284
		CHIR 4	3358	3945	3685	3662.67		CHIR 4	440.3	344.3	345.1	376.567	0.102812			-10.8587
Fgf18			i	ii	iii	Mean			i	ii	iii	Mean	Relative expression (GOI/Tbp)		Mean (GOI/Tbp)	Fold change			T-test
		Control 1	2081	1889	2098	2022.67		Control 1	2089	2352	2055	2165.33	1.07053	Control Mean	1.58127
		Control 2	2465	2529	2425	2473		Control 2	3164	3404	3721	3429.67	1.38684	Control S.E.M	0.226607
		Control 3	2796	2447	2327	2523.33		Control 3	5309	4669	4892	4956.67	1.96433
		Control 4	1518	1517	1508	1514.33		Control 4	2957	2720	2970	2882.33	1.90337
		CHIR 1	3013	3031	3008	3017.33		CHIR 1	1362	1322	1033	1239	0.410627	CHIR Mean	0.646745	-3.85086	FC Mean	-2.44497	0.0126672
		CHIR2	3440	3450	3599	3496.33		CHIR2	3611	2839	2352	2934	0.839165	CHIR S.E.M	0.150451	-1.88434	FC S.E.M	0.613564
		CHIR 3	2835	3204	2991	3010		CHIR 3	2942	2942	3063	2982.33	0.990808			-1.59594
		CHIR 4	3358	3945	3685	3662.67		CHIR 4	1366	1348	1092	1268.67	0.346378			-1.82576
Fgf20			i	ii	iii	Mean			i	ii	iii	Mean	Relative expression (GOI/Tbp)		Mean (GOI/Tbp)	Fold change			T-test
		Control 1	2081	1889	2098	2022.67		Control 1	1080	1324	1349	1251	0.61849	Control Mean	0.74881
		Control 2	2465	2529	2425	2473		Control 2	1351	1618	1456	1475	0.596442	Control S.E.M	0.0965027
		Control 3	2796	2447	2327	2523.33		Control 3	2412	2441	2272	2375	0.941215
		Control 4	1518	1517	1508	1514.33		Control 4	1255	1324	1233	1270.67	0.839093
		CHIR 1	3013	3031	3008	3017.33		CHIR 1	23020	24690	25750	24486.7	8.11533	CHIR Mean	5.90831	10.8376	FC Mean	7.89026	0.00259639
		CHIR2	3440	3450	3599	3496.33		CHIR2	13040	12290	13540	12956.7	3.70579	CHIR S.E.M	1.16291	4.9489	FC S.E.M	1.55301
		CHIR 3	2835	3204	2991	3010		CHIR 3	14070	14450	13270	13930	4.62791			6.18035
		CHIR 4	3358	3945	3685	3662.67		CHIR 4	25420	27600	25920	26313.3	7.1842			9.59416
Wnt5b			i	ii	iii	Mean			i	ii	iii	Mean	Relative expression (GOI/Tbp)		Mean (GOI/Tbp)	Fold change			T-test
		Control 1	2081	1889	2098	2022.67		Control 1	1131	1378	1626	1378.33	0.681444	Control Mean	0.707205
		Control 2	2465	2529	2425	2473		Control 2	1828	1717	1080	1541.67	0.623399	Control S.E.M	0.0533465
		Control 3	2796	2447	2327	2523.33		Control 3	2028	2355	1902	2095	0.830251
		Control 4	1518	1517	1508	1514.33		Control 4	1163	1051	937.6	1050.53	0.693727
		CHIR 1	3013	3031	3008	3017.33		CHIR 1	1976	2279	2637	2297.33	0.761379	CHIR Mean	0.896383	1.0766	FC Mean	1.2675	0.0874397
		CHIR2	3440	3450	3599	3496.33		CHIR2	3944	4215	3739	3966	1.13433	CHIR S.E.M	0.0982507	1.60396	FC S.E.M	0.138928
		CHIR 3	2835	3204	2991	3010		CHIR 3	2299	2511	2780	2530	0.840532			1.18853
		CHIR 4	3358	3945	3685	3662.67		CHIR 4	2827	3507	2998	3110.67	0.84929			1.20091
Wnt9a			i	ii	iii	Mean			i	ii	iii	Mean	Relative expression (GOI/Tbp)		Mean (GOI/Tbp)	Fold change			T-test
		Control 1	2081	1889	2098	2022.67		Control 1	2383	2438	2673	2498	1.235	Control Mean	1.32108
		Control 2	2465	2529	2425	2473		Control 2	2806	3366	2259	2810.33	1.13641	Control S.E.M	0.144556
		Control 3	2796	2447	2327	2523.33		Control 3	4288	4008	4415	4237	1.67913
		Control 4	1518	1517	1508	1514.33		Control 4	2239	1741	1625	1868.33	1.23377
		CHIR 1	3013	3031	3008	3017.33		CHIR 1	958	1194	1762	1304.67	0.432391	CHIR Mean	0.676265	-3.05528	FC Mean	-1.95349	0.0270872
		CHIR2	3440	3450	3599	3496.33		CHIR2	3391	3436	3237	3354.67	0.959481	CHIR S.E.M	0.162578	-1.37686	FC S.E.M	0.497864
		CHIR 3	2835	3204	2991	3010		CHIR 3	2842	2438	3983	3087.67	1.0258			-1.28785
		CHIR 4	3358	3945	3685	3662.67		CHIR 4	924.8	1122	1111	1052.6	0.287386			-2.63394
Fzd1			i	ii	iii	Mean			i	ii	iii	Mean	Relative expression (GOI/Tbp)		Mean (GOI/Tbp)	Fold change			T-test
		Control 1	2081	1889	2098	2022.67		Control 1	1792	1759	1829	1793.33	0.886618	Control Mean	1.4799
		Control 2	2465	2529	2425	2473		Control 2	3976	3669	3795	3813.33	1.54199	Control S.E.M	0.209953
		Control 3	2796	2447	2327	2523.33		Control 3	4062	4202	4371	4211.67	1.66909
		Control 4	1518	1517	1508	1514.33		Control 4	2859	2628	2790	2759	1.82192
		CHIR 1	3013	3031	3008	3017.33		CHIR 1	2687	2598	2701	2662	0.882236	CHIR Mean	1.15617	-1.67745	FC Mean	-1.28	0.215859
		CHIR2	3440	3450	3599	3496.33		CHIR2	4254	4546	4622	4474	1.27963	CHIR S.E.M	0.132537	-1.15651	FC S.E.M	0.164535
		CHIR 3	2835	3204	2991	3010		CHIR 3	4260	4170	4075	4168.33	1.38483			-1.06866
		CHIR 4	3358	3945	3685	3662.67		CHIR 4	3903	3977	3965	3948.33	1.07799			-0.62683
Fzd2			i	ii	iii	Mean			i	ii	iii	Mean	Relative expression (GOI/Tbp)		Mean (GOI/Tbp)	Fold change			T-test
		Control 1	2081	1889	2098	2022.67		Control 1	424.6	553.2	562	513.267	0.253757	Control Mean	0.961264
		Control 2	2465	2529	2425	2473		Control 2	2725	2966	3323	3004.67	1.21499	Control S.E.M	0.303538
		Control 3	2796	2447	2327	2523.33		Control 3	3206	3350	3866	3474	1.37675
		Control 4	1518	1517	1508	1514.33		Control 4	1378	1567	1596	1513.67	0.99956
		CHIR 1	3013	3031	3008	3017.33		CHIR 1	1279	1396	1369	1348	0.446752	CHIR Mean	0.56132	-2.15167	FC Mean	-1.7125	0.165646
		CHIR2	3440	3450	3599	3496.33		CHIR2	1835	2031	1829	1898.33	0.54295	CHIR S.E.M	0.0630603	-1.77045	FC S.E.M	0.193032
		CHIR 3	2835	3204	2991	3010		CHIR 3	2011	2183	2098	2097.33	0.696788			-1.37956
		CHIR 4	3358	3945	3685	3662.67		CHIR 4	1963	2166	2011	2046.67	0.558791			-1.86169
Fzd4			i	ii	iii	Mean			i	ii	iii	Mean	Relative expression (GOI/Tbp)		Mean (GOI/Tbp)	Fold change			T-test
		Control 1	2081	1889	2098	2022.67		Control 1	2029	1994	1730	1917.67	0.948088	Control Mean	0.970369
		Control 2	2465	2529	2425	2473		Control 2	2512	2492	2342	2448.67	0.99016	Control S.E.M	0.0349396
		Control 3	2796	2447	2327	2523.33		Control 3	2580	2771	2859	2736.67	1.08454
		Control 4	1518	1517	1508	1514.33		Control 4	1133	1391	1377	1300.33	0.858684
		CHIR 1	3013	3031	3008	3017.33		CHIR 1	4711	4755	5279	4915	1.62892	CHIR Mean	1.61145	1.67866	FC Mean	1.66065	0.000133573
		CHIR2	3440	3450	3599	3496.33		CHIR2	5954	6257	5405	5872	1.67947	CHIR S.E.M	0.0620849	1.73076	FC S.E.M	0.0639807
		CHIR 3	2835	3204	2991	3010		CHIR 3	3990	4538	4508	4345.33	1.44363			1.48771
		CHIR 4	3358	3945	3685	3662.67		CHIR 4	6025	6635	5951	6203.67	1.69376			1.74548
Fzd7			i	ii	iii	Mean			i	ii	iii	Mean	Relative expression (GOI/Tbp)		Mean (GOI/Tbp)	Fold change			T-test
		Control 1	2081	1889	2098	2022.67		Control 1	1968	1907	2024	1966.33	0.972149	Control Mean	1.01423
		Control 2	2465	2529	2425	2473		Control 2	1904	2122	2216	2080.67	0.841353	Control S.E.M	0.039776
		Control 3	2796	2447	2327	2523.33		Control 3	2252	2549	2657	2486	0.985205
		Control 4	1518	1517	1508	1514.33		Control 4	1872	1903	1941	1905.33	1.2582
		CHIR 1	3013	3031	3008	3017.33		CHIR 1	3394	3425	3387	3402	1.12749	CHIR Mean	1.31961	1.11167	FC Mean	1.3011	0.0388727
		CHIR2	3440	3450	3599	3496.33		CHIR2	4424	4815	4649	4629.33	1.32405	CHIR S.E.M	0.0572429	1.30548	FC S.E.M	0.05644
		CHIR 3	2835	3204	2991	3010		CHIR 3	4015	4091	3881	3995.67	1.32746			1.30884
		CHIR 4	3358	3945	3685	3662.67		CHIR 4	5655	5545	5276	5492	1.49945			1.47842
Fzd8			i	ii	iii	Mean			i	ii	iii	Mean	Relative expression (GOI/Tbp)		Mean (GOI/Tbp)	Fold change			T-test
		Control 1	2081	1889	2098	2022.67		Control 1	1739	1813	1570	1707.33	0.8441	Control Mean	1.04298
		Control 2	2465	2529	2425	2473		Control 2	2625	2611	2496	2577.33	1.04219	Control S.E.M	0.0882156
		Control 3	2796	2447	2327	2523.33		Control 3	3155	2923	2976	3018	1.19604
		Control 4	1518	1517	1508	1514.33		Control 4	1797	1443	1710	1650	1.08959
		CHIR 1	3013	3031	3008	3017.33		CHIR 1	2390	2530	2522	2480.67	0.822139	CHIR Mean	0.962527	-1.26862	FC Mean	-1.08358	0.464012
		CHIR2	3440	3450	3599	3496.33		CHIR2	3356	3737	3533	3542	1.01306	CHIR S.E.M	0.0802004	-1.02953	FC S.E.M	0.0903864
		CHIR 3	2835	3204	2991	3010		CHIR 3	3420	3397	3485	3434	1.14086			-0.914201
		CHIR 4	3358	3945	3685	3662.67		CHIR 4	3140	3165	3299	3201.33	0.874044			-1.09696
Fzd10			i	ii	iii	Mean			i	ii	iii	Mean	Relative expression (GOI/Tbp)		Mean (GOI/Tbp)	Fold change			T-test
		Control 1	2081	1889	2098	2022.67		Control 1	1232	1359	1213	1268	0.626895	Control Mean	1.05665
		Control 2	2465	2529	2425	2473		Control 2	1932	2074	2067	2024.33	0.818574	Control S.E.M	0.111838
		Control 3	2796	2447	2327	2523.33		Control 3	2572	2832	2717	2707	1.07279
		Control 4	1518	1517	1508	1514.33		Control 4	2509	2447	2805	2587	1.70834
		CHIR 1	3013	3031	3008	3017.33		CHIR 1	2567	2625	2639	2610.33	0.865113	CHIR Mean	0.740779	-1.2214	FC Mean	-1.4264	0.240262
		CHIR2	3440	3450	3599	3496.33		CHIR2	2170	2059	1990	2073	0.592907	CHIR S.E.M	0.0680525	-1.78215	FC S.E.M	0.141083
		CHIR 3	2835	3204	2991	3010		CHIR 3	2091	2255	2249	2198.33	0.730343			-1.44679
		CHIR 4	3358	3945	3685	3662.67		CHIR 4	2902	2971	2640	2837.67	0.774754			-1.22153
Ror1			i	ii	iii	Mean			i	ii	iii	Mean	Relative expression (GOI/Tbp)		Mean (GOI/Tbp)	Fold change			T-test
		Control 1	2081	1889	2098	2022.67		Control 1	748.5	876	885.5	836.667	0.413645	Control Mean	0.60357
		Control 2	2465	2529	2425	2473		Control 2	1467	1414	1649	1510	0.610594	Control S.E.M	0.08654
		Control 3	2796	2447	2327	2523.33		Control 3	2002	1962	1779	1914.33	0.758653
		Control 4	1518	1517	1508	1514.33		Control 4	856.6	1088	923.8	956.133	0.631389
		CHIR 1	3013	3031	3008	3017.33		CHIR 1	1942	1853	1728	1841	0.610141	CHIR Mean	0.649916	1.01089	FC Mean	1.07679	0.609668
		CHIR2	3440	3450	3599	3496.33		CHIR2	2227	2700	2318	2415	0.690724	CHIR S.E.M	0.0376405	1.1444	FC S.E.M	0.0623631
		CHIR 3	2835	3204	2991	3010		CHIR 3	2331	2295	2242	2289.33	0.760576			1.26013
		CHIR 4	3358	3945	3685	3662.67		CHIR 4	1882	2198	1834	1971.33	0.538224			0.891733
Ror2			i	ii	iii	Mean			i	ii	iii	Mean	Relative expression (GOI/Tbp)		Mean (GOI/Tbp)	Fold change			T-test
		Control 1	2081	1889	2098	2022.67		Control 1	692.7	661.8	653.9	669.467	0.330982	Control Mean	0.385648
		Control 2	2465	2529	2425	2473		Control 2	986.5	929.8	880.6	932.3	0.376992	Control S.E.M	0.0346215
		Control 3	2796	2447	2327	2523.33		Control 3	1157	1227	1152	1178.67	0.467107
		Control 4	1518	1517	1508	1514.33		Control 4	566.6	543.1	559.9	556.533	0.36751
		CHIR 1	3013	3031	3008	3017.33		CHIR 1	2012	2099	2124	2078.33	0.688798	CHIR Mean	0.722326	1.78608	FC Mean	1.87302	0.000143081
		CHIR2	3440	3450	3599	3496.33		CHIR2	2848	2767	2804	2806.33	0.80265	CHIR S.E.M	0.0320212	2.0813	FC S.E.M	0.0830322
		CHIR 3	2835	3204	2991	3010		CHIR 3	2166	2055	2054	2091.67	0.694906			1.80192
		CHIR 4	3358	3945	3685	3662.67		CHIR 4	2769	2524	2431	2574.67	0.702949			1.82277
Dkk1			i	ii	iii	Mean			i	ii	iii	Mean	Relative expression (GOI/Tbp)		Mean (GOI/Tbp)	Fold change			T-test
		Control 1	2081	1889	2098	2022.67		Control 1		1215	1659	1437	0.710448	Control Mean	0.774038
		Control 2	2465	2529	2425	2473		Control 2		2841	2666	2753.5	1.11342	Control S.E.M	0.124908
		Control 3	2796	2447	2327	2523.33		Control 3	1732	1682	1553	1655.67	0.656143
		Control 4	1518	1517	1508	1514.33		Control 4	968.2	824.9	1006	933.033	0.616135
		CHIR 1	3013	3031	3008	3017.33		CHIR 1	10760	9423	9244	9809	3.25088	CHIR Mean	3.98284	4.1999	FC Mean	5.14554	0.000254681
		CHIR2	3440	3450	3599	3496.33		CHIR2	17950	17760	15450	17053.3	4.87749	CHIR S.E.M	0.421096	6.30136	FC S.E.M	0.544025
		CHIR 3	2835	3204	2991	3010		CHIR 3	12680	13670	13770	13373.3	4.44297			5.73999
		CHIR 4	3358	3945	3685	3662.67		CHIR 4	12540	12030	12350	12306.7	3.36003			4.34091
Dkk4			i	ii	iii	Mean			i	ii	iii	Mean	Relative expression (GOI/Tbp)		Mean (GOI/Tbp)	Fold change			T-test
		Control 1	2081	1889	2098	2022.67		Control 1	620.1	717.3	729	688.8	0.340541	Control Mean	0.623474
		Control 2	2465	2529	2425	2473		Control 2	1504	1417	1475	1465.33	0.592533	Control S.E.M	0.120164
		Control 3	2796	2447	2327	2523.33		Control 3	1951	2180	2084	2071.67	0.821004
		Control 4	1518	1517	1508	1514.33		Control 4	1090	1164	1107	1120.33	0.73982
		CHIR 1	3013	3031	3008	3017.33		CHIR 1	36140	39460	35850	37150	12.3122	CHIR Mean	9.60431	19.7477	FC Mean	15.4045	0.000714187
		CHIR2	3440	3450	3599	3496.33		CHIR2	25220	23730	26640	25196.7	7.2066	CHIR S.E.M	1.48461	11.5588	FC S.E.M	2.38119
		CHIR 3	2835	3204	2991	3010		CHIR 3	21980	20710	21720	21470	7.13289			11.4406
		CHIR 4	3358	3945	3685	3662.67		CHIR 4	44660	42770	41850	43093.3	11.7656			18.871

## Sheet: Fig 1D IWR-1 treatment
Gene symbol			Tbp quantity (Copies)						GOI quantity (Copies)
			i	ii	iii	Mean			i	ii	iii	Mean	Relative expression (GOI/Tbp)		Mean (GOI/Tbp)	Fold change			T-test
Bmp2		Control 1	1668	1815	1572	1685		Control 1	1092	1038	846.1	992.033	0.588744	Control Mean	0.485941
		Control 2	1885	1757	1890	1844		Control 2	750.5	742	883.2	791.9	0.429447	Control S.E.M	0.0514856
		Control 3	2230	2319	2337	2295.33		Control 3	950.3	1031	1046	1009.1	0.439631
		IWR-1 1	1784	1755	1793	1777.33		IWR-1 1	174.4	229.2	236.7	213.433	0.120086	IWR-1 Mean	0.181815	-4.0466	FC Mean	-2.67272	0.00931548
		IWR-1 2	1996	1744	1990	1910		IWR-1 2	300.2	318.7	359.6	326.167	0.170768	IWR-1 S.E.M	0.039219	-2.84562	FC S.E.M	0.618721
		IWR-1 3	1806	1583	1839	1742.67		IWR-1 3	413.4	471.4	446.2	443.667	0.254591			-1.90871
Bmp4			i	ii	iii	Mean			i	ii	iii	Mean	Relative expression (GOI/Tbp)		Mean (GOI/Tbp)	Fold change			T-test
		Control 1	1668	1815	1572	1685		Control 1	1819	1942	1755	1838.67	1.0912	Control Mean	1.24896
		Control 2	1885	1757	1890	1844		Control 2	2396	2289	2555	2413.33	1.30875	Control S.E.M	0.0796484
		Control 3	2230	2319	2337	2295.33		Control 3	3749	2566	2960	3091.67	1.34694
		IWR-1 1	1784	1755	1793	1777.33		IWR-1 1	1101	1125	1169	1131.67	0.636722	IWR-1 Mean	0.832068	-1.96155	FC Mean	-1.50103	0.0299653
		IWR-1 2	1996	1744	1990	1910		IWR-1 2	1664	1677	1894	1745	0.913613	IWR-1 S.E.M	0.0981158	-1.36706	FC S.E.M	0.206373
		IWR-1 3	1806	1583	1839	1742.67		IWR-1 3	1719	1554	1672	1648.33	0.945868			-1.32044
Rgma			i	ii	iii	Mean			i	ii	iii	Mean	Relative expression (GOI/Tbp)		Mean (GOI/Tbp)	Fold change			T-test
		Control 1	1668	1815	1572	1685		Control 1	4100	3415	3814	3776.33	2.24115	Control Mean	1.54748
		Control 2	1885	1757	1890	1844		Control 2	1998	2052	2239	2096.33	1.13684	Control S.E.M	0.348785
		Control 3	2230	2319	2337	2295.33		Control 3	2745	2792	3170	2902.33	1.26445
		IWR-1 1	1784	1755	1793	1777.33		IWR-1 1	2328	2413	2494	2411.67	1.3569	IWR-1 Mean	1.36919	-1.14045	FC Mean	-1.13022	0.63699
		IWR-1 2	1996	1744	1990	1910		IWR-1 2	2528	2631	2963	2707.33	1.41745	IWR-1 S.E.M	0.0250835	-1.09173	FC S.E.M	0.0204715
		IWR-1 3	1806	1583	1839	1742.67		IWR-1 3	2121	2381	2468	2323.33	1.33321			-1.16072
Rgmb			i	ii	iii	Mean			i	ii	iii	Mean	Relative expression (GOI/Tbp)		Mean (GOI/Tbp)	Fold change			T-test
		Control 1	1668	1815	1572	1685		Control 1	3595	3711	3376	3560.67	2.11316	Control Mean	1.67255
		Control 2	1885	1757	1890	1844		Control 2	2729	2645	2635	2669.67	1.44776	Control S.E.M	0.22032
		Control 3	2230	2319	2337	2295.33		Control 3	3440	3265	3326	3343.67	1.45672
		IWR-1 1	1784	1755	1793	1777.33		IWR-1 1	1774	1622	1613	1669.67	0.939422	IWR-1 Mean	1.17586	-1.7804	FC Mean	-1.4224	0.126267
		IWR-1 2	1996	1744	1990	1910		IWR-1 2	2892	2548	2597	2679	1.40262	IWR-1 S.E.M	0.133801	-1.19245	FC S.E.M	0.171589
		IWR-1 3	1806	1583	1839	1742.67		IWR-1 3	2142	1955	2101	2066	1.18554			-1.41079
Bambi			i	ii	iii	Mean			i	ii	iii	Mean	Relative expression (GOI/Tbp)		Mean (GOI/Tbp)	Fold change			T-test
		Control 1	1668	1815	1572	1685		Control 1	1084	1159	928.3	1057.1	0.627359	Control Mean	0.565534
		Control 2	1885	1757	1890	1844		Control 2	1019	977.3	973.6	989.967	0.536858	Control S.E.M	0.0309395
		Control 3	2230	2319	2337	2295.33		Control 3	1217	1175	1274	1222	0.532385
		IWR-1 1	1784	1755	1793	1777.33		IWR-1 1	1153	889.8	1156	1066.27	0.599925	IWR-1 Mean	0.542774	-0.942674	FC Mean	-1.04193	0.657177
		IWR-1 2	1996	1744	1990	1910		IWR-1 2	851.2	874.1	1002	909.1	0.475969	IWR-1 S.E.M	0.0361073	-1.18817	FC S.E.M	0.0722203
		IWR-1 3	1806	1583	1839	1742.67		IWR-1 3	830.8	1061	996.3	962.7	0.552429			-1.02372
Ctgf			i	ii	iii	Mean			i	ii	iii	Mean	Relative expression (GOI/Tbp)		Mean (GOI/Tbp)	Fold change			T-test
		Control 1	1668	1815	1572	1685		Control 1	1154	1078	1201	1144.33	0.67913	Control Mean	1.02681
		Control 2	1885	1757	1890	1844		Control 2	2150	2190	1949	2096.33	1.13684	Control S.E.M	0.177699
		Control 3	2230	2319	2337	2295.33		Control 3	3283	2505	2919	2902.33	1.26445
		IWR-1 1	1784	1755	1793	1777.33		IWR-1 1	644	467.6	636.3	582.633	0.327813	IWR-1 Mean	0.329802	-3.13229	FC Mean	-3.11341	0.0172249
		IWR-1 2	1996	1744	1990	1910		IWR-1 2	521.5	616.6	722.4	620.167	0.324695	IWR-1 S.E.M	0.0036603	-3.16238	FC S.E.M	0.0342859
		IWR-1 3	1806	1583	1839	1742.67		IWR-1 3	486.1	629.6	645.6	587.1	0.336897			-3.04783
Tsku			i	ii	iii	Mean			i	ii	iii	Mean	Relative expression (GOI/Tbp)		Mean (GOI/Tbp)	Fold change			T-test
		Control 1	1668	1815	1572	1685		Control 1	2265	2455	2479	2399.67	1.42413	Control Mean	1.32937
		Control 2	1885	1757	1890	1844		Control 2	2169	2303	2133	2201.67	1.19396	Control S.E.M	0.0694844
		Control 3	2230	2319	2337	2295.33		Control 3	3110	3112	3212	3144.67	1.37003
		IWR-1 1	1784	1755	1793	1777.33		IWR-1 1	1643	1481	1592	1572	0.884471	IWR-1 Mean	0.90906	-1.50302	FC Mean	-1.46236	0.0149095
		IWR-1 2	1996	1744	1990	1910		IWR-1 2	2089	1973	1957	2006.33	1.05044	IWR-1 S.E.M	0.0755328	-1.26554	FC S.E.M	0.1195
		IWR-1 3	1806	1583	1839	1742.67		IWR-1 3	1520	1415	1207	1380.67	0.792272			-1.67793
Nog			i	ii	iii	Mean			i	ii	iii	Mean	Relative expression (GOI/Tbp)		Mean (GOI/Tbp)	Fold change			T-test
		Control 1	1668	1815	1572	1685		Control 1	2657	3036	2577	2756.67	1.636	Control Mean	2.11256
		Control 2	1885	1757	1890	1844		Control 2	3624	4813	3341	3926	2.12907	Control S.E.M	0.270501
		Control 3	2230	2319	2337	2295.33		Control 3	6184	5141	6390	5905	2.57261
		IWR-1 1	1784	1755	1793	1777.33		IWR-1 1		2513	2321	2417	1.3599	IWR-1 Mean	1.253	-1.55346	FC Mean	-1.686	0.0389232
		IWR-1 2	1996	1744	1990	1910		IWR-1 2	2733	2177	2640	2516.67	1.31763	IWR-1 S.E.M	0.0866241	-1.60331	FC S.E.M	0.125827
		IWR-1 3	1806	1583	1839	1742.67		IWR-1 3	1673	2374	1607	1884.67	1.08148			-1.95339
Fgf7			i	ii	iii	Mean			i	ii	iii	Mean	Relative expression (GOI/Tbp)		Mean (GOI/Tbp)	Fold change			T-test
		Control 1	1668	1815	1572	1685		Control 1	1200	1537	1336	1357.67	0.805737	Control Mean	0.691159
		Control 2	1885	1757	1890	1844		Control 2	1215	1509	1250	1324.67	0.718366	Control S.E.M	0.075245
		Control 3	2230	2319	2337	2295.33		Control 3	1343	1240	1200	1261	0.549376
		IWR-1 1	1784	1755	1793	1777.33		IWR-1 1	1343	1831	1934	1702.67	0.957989	IWR-1 Mean	0.85904	1.38606	FC Mean	1.2429	0.153778
		IWR-1 2	1996	1744	1990	1910		IWR-1 2	1798	1534	1624	1652	0.864921	IWR-1 S.E.M	0.0589001	1.25141	FC S.E.M	0.0852192
		IWR-1 3	1806	1583	1839	1742.67		IWR-1 3	1253	1230	1460	1314.33	0.754208			1.09122
Fgf9			i	ii	iii	Mean			i	ii	iii	Mean	Relative expression (GOI/Tbp)		Mean (GOI/Tbp)	Fold change			T-test
		Control 1	1668	1815	1572	1685		Control 1	3381	2910	3228	3173	1.88309	Control Mean	1.52799
		Control 2	1885	1757	1890	1844		Control 2	2238	2360	2529	2375.67	1.28832	Control S.E.M	0.181133
		Control 3	2230	2319	2337	2295.33		Control 3	3459	2708	3560	3242.33	1.41258
		IWR-1 1	1784	1755	1793	1777.33		IWR-1 1	2054	1812	1681	1849	1.04032	IWR-1 Mean	0.814533	-1.46877	FC Mean	-1.87592	0.0308076
		IWR-1 2	1996	1744	1990	1910		IWR-1 2	1201	1011	1357	1189.67	0.622862	IWR-1 S.E.M	0.121712	-2.45318	FC S.E.M	0.284177
		IWR-1 3	1806	1583	1839	1742.67		IWR-1 3	1315	1381	1384	1360	0.780413			-1.95793
Fgf10			i	ii	iii	Mean			i	ii	iii	Mean	Relative expression (GOI/Tbp)		Mean (GOI/Tbp)	Fold change			T-test
		Control 1	1668	1815	1572	1685		Control 1	1675	1859	1539	1691	1.00356	Control Mean	0.85454
		Control 2	1885	1757	1890	1844		Control 2	1393	1339	1405	1379	0.747831	Control S.E.M	0.0767945
		Control 3	2230	2319	2337	2295.33		Control 3	1938	1826	1829	1864.33	0.812228
		IWR-1 1	1784	1755	1793	1777.33		IWR-1 1	1454	1454	1546	1484.67	0.835334	IWR-1 Mean	0.743645	-1.02299	FC Mean	-1.14912	0.295425
		IWR-1 2	1996	1744	1990	1910		IWR-1 2	1355	1245	1621	1407	0.736649	IWR-1 S.E.M	0.0510371	-1.16004	FC S.E.M	0.0790464
		IWR-1 3	1806	1583	1839	1742.67		IWR-1 3	1401	1005	1039	1148.33	0.658952			-1.29682
Fgf18			i	ii	iii	Mean			i	ii	iii	Mean	Relative expression (GOI/Tbp)		Mean (GOI/Tbp)	Fold change			T-test
		Control 1	1668	1815	1572	1685		Control 1	3940	3935	4057	3977.33	2.36044	Control Mean	1.5305
		Control 2	1885	1757	1890	1844		Control 2	1989	2053	2009	2017	1.09382	Control S.E.M	0.415159
		Control 3	2230	2319	2337	2295.33		Control 3	2712	2710	2409	2610.33	1.13723
		IWR-1 1	1784	1755	1793	1777.33		IWR-1 1	4819	4496	4881	4732	2.66242	IWR-1 Mean	1.96704	1.73958	FC Mean	1.28523	0.501126
		IWR-1 2	1996	1744	1990	1910		IWR-1 2	2187	2183	2559	2309.67	1.20925	IWR-1 S.E.M	0.420652	0.790103	FC S.E.M	0.274847
		IWR-1 3	1806	1583	1839	1742.67		IWR-1 3	3910	3467	3233	3536.67	2.02946			1.32601
Fgf20			i	ii	iii	Mean			i	ii	iii	Mean	Relative expression (GOI/Tbp)		Mean (GOI/Tbp)	Fold change			T-test
		Control 1	1668	1815	1572	1685		Control 1	904.1	847.2	892.2	881.167	0.522948	Control Mean	0.504085
		Control 2	1885	1757	1890	1844		Control 2	812.8	991.8	905.3	903.3	0.489859	Control S.E.M	0.00982918
		Control 3	2230	2319	2337	2295.33		Control 3	1233	975.2	1231	1146.4	0.499448
		IWR-1 1	1784	1755	1793	1777.33		IWR-1 1	163.6	170.5	236.1	190.067	0.106939	IWR-1 Mean	0.182036	-4.71375	FC Mean	-2.76914	0.00213923
		IWR-1 2	1996	1744	1990	1910		IWR-1 2	488.2	485	524.6	499.267	0.261396	IWR-1 S.E.M	0.0446388	-1.92843	FC S.E.M	0.82018
		IWR-1 3	1806	1583	1839	1742.67		IWR-1 3	296	348.1	285.3	309.8	0.177774			-2.83555
Wnt5b			i	ii	iii	Mean			i	ii	iii	Mean	Relative expression (GOI/Tbp)		Mean (GOI/Tbp)	Fold change			T-test
		Control 1	1668	1815	1572	1685		Control 1	1678	1566	1279	1507.67	0.894758	Control Mean	0.674354
		Control 2	1885	1757	1890	1844		Control 2	1337	903.9	916.1	1052.33	0.57068	Control S.E.M	0.110266
		Control 3	2230	2319	2337	2295.33		Control 3	1457	997.8	1385	1279.93	0.557624
		IWR-1 1	1784	1755	1793	1777.33		IWR-1 1	1112	954.2	982	1016.07	0.57168	IWR-1 Mean	0.551045	-1.1796	FC Mean	-1.22377	0.342916
		IWR-1 2	1996	1744	1990	1910		IWR-1 2	973.7	961.4	866.6	933.9	0.488953	IWR-1 S.E.M	0.0316226	-1.37918	FC S.E.M	0.0744042
		IWR-1 3	1806	1583	1839	1742.67		IWR-1 3	1078	1184	835.6	1032.53	0.592502			-1.13815
Wnt9a			i	ii	iii	Mean			i	ii	iii	Mean	Relative expression (GOI/Tbp)		Mean (GOI/Tbp)	Fold change			T-test
		Control 1	1668	1815	1572	1685		Control 1	2001	1912	2010	1974.33	1.17171	Control Mean	1.02149
		Control 2	1885	1757	1890	1844		Control 2	2164	1455	1335	1651.33	0.895517	Control S.E.M	0.080647
		Control 3	2230	2319	2337	2295.33		Control 3	2149	2282	2436	2289	0.997241
		IWR-1 1	1784	1755	1793	1777.33		IWR-1 1	1592	1197	1596	1461.67	0.822393	IWR-1 Mean	0.964973	-1.24209	FC Mean	-1.05857	0.670599
		IWR-1 2	1996	1744	1990	1910		IWR-1 2	1517	1750	2073	1780	0.931937	IWR-1 S.E.M	0.0933286	-1.09609	FC S.E.M	0.100442
		IWR-1 3	1806	1583	1839	1742.67		IWR-1 3	1849	1953	2161	1987.67	1.14059			-0.895581
Fzd1			i	ii	iii	Mean			i	ii	iii	Mean	Relative expression (GOI/Tbp)		Mean (GOI/Tbp)	Fold change			T-test
		Control 1	1668	1815	1572	1685		Control 1	1671	1586	1712	1656.33	0.982987	Control Mean	0.976414
		Control 2	1885	1757	1890	1844		Control 2	1701	1559	1765	1675	0.908351	Control S.E.M	0.0375425
		Control 3	2230	2319	2337	2295.33		Control 3	2644	2184	2319	2382.33	1.0379
		IWR-1 1	1784	1755	1793	1777.33		IWR-1 1	1294	1268	1274	1278.67	0.71943	IWR-1 Mean	0.72914	-1.35721	FC Mean	-1.33913	0.00302185
		IWR-1 2	1996	1744	1990	1910		IWR-1 2	1319	1398	1419	1378.67	0.721815	IWR-1 S.E.M	0.00854512	-1.35272	FC S.E.M	0.0155217
		IWR-1 3	1806	1583	1839	1742.67		IWR-1 3	1171	1328	1402	1300.33	0.746174			-1.30856
Fzd2			i	ii	iii	Mean			i	ii	iii	Mean	Relative expression (GOI/Tbp)		Mean (GOI/Tbp)	Fold change			T-test
		Control 1	1668	1815	1572	1685		Control 1	1383	1403	1570	1452	0.861721	Control Mean	0.769329
		Control 2	1885	1757	1890	1844		Control 2	1246	1239	1572	1352.33	0.733369	Control S.E.M	0.0465727
		Control 3	2230	2319	2337	2295.33		Control 3	1751	1561	1597	1636.33	0.712896
		IWR-1 1	1784	1755	1793	1777.33		IWR-1 1	1206	1282	1437	1308.33	0.736122	IWR-1 Mean	0.702129	-1.04511	FC Mean	-1.09571	0.301953
		IWR-1 2	1996	1744	1990	1910		IWR-1 2	1429	1307	1464	1400	0.732984	IWR-1 S.E.M	0.0324369	-1.04958	FC S.E.M	0.053302
		IWR-1 3	1806	1583	1839	1742.67		IWR-1 3	963.7	1075	1293	1110.57	0.63728			-1.20721
Fzd4			i	ii	iii	Mean			i	ii	iii	Mean	Relative expression (GOI/Tbp)		Mean (GOI/Tbp)	Fold change			T-test
		Control 1	1668	1815	1572	1685		Control 1	1499	1546	1671	1572	0.932938	Control Mean	0.749357
		Control 2	1885	1757	1890	1844		Control 2	1160	1335	1223	1239.33	0.67209	Control S.E.M	0.0921725
		Control 3	2230	2319	2337	2295.33		Control 3	1696	1284	1448	1476	0.643044
		IWR-1 1	1784	1755	1793	1777.33		IWR-1 1	1780	1671	1714	1721.67	0.96868	IWR-1 Mean	0.836541	1.29268	FC Mean	1.11635	0.493787
		IWR-1 2	1996	1744	1990	1910		IWR-1 2	1292	1494	1391	1392.33	0.72897	IWR-1 S.E.M	0.0702799	0.972794	FC S.E.M	0.093787
		IWR-1 3	1806	1583	1839	1742.67		IWR-1 3	1383	1344	1518	1415	0.811974			1.08356
Fzd7			i	ii	iii	Mean			i	ii	iii	Mean	Relative expression (GOI/Tbp)		Mean (GOI/Tbp)	Fold change			T-test
		Control 1	1668	1815	1572	1685		Control 1	1501	2364	1776	1880.33	1.11592	Control Mean	0.958407
		Control 2	1885	1757	1890	1844		Control 2		1760	1894	1827	0.990781	Control S.E.M	0.101586
		Control 3	2230	2319	2337	2295.33		Control 3		1746	1782	1764	0.768516
		IWR-1 1	1784	1755	1793	1777.33		IWR-1 1	958.2	782.5	941.1	893.933	0.502963	IWR-1 Mean	0.541668	-1.90552	FC Mean	-1.76936	0.0157368
		IWR-1 2	1996	1744	1990	1910		IWR-1 2	913	1217	1092	1074	0.562304	IWR-1 S.E.M	0.0193664	-1.70443	FC S.E.M	0.0657661
		IWR-1 3	1806	1583	1839	1742.67		IWR-1 3	952.4	916.9	1057	975.433	0.559736			-1.71225
Fzd8			i	ii	iii	Mean			i	ii	iii	Mean	Relative expression (GOI/Tbp)		Mean (GOI/Tbp)	Fold change			T-test
		Control 1	1668	1815	1572	1685		Control 1	1838	1791	1806	1811.67	1.07517	Control Mean	0.880172
		Control 2	1885	1757	1890	1844		Control 2	1470	1412	1514	1465.33	0.794649	Control S.E.M	0.0977454
		Control 3	2230	2319	2337	2295.33		Control 3	1560	1894	1853	1769	0.770694
		IWR-1 1	1784	1755	1793	1777.33		IWR-1 1	1664	1906	1900	1823.33	1.02588	IWR-1 Mean	0.970579	1.16555	FC Mean	1.10271	0.426796
		IWR-1 2	1996	1744	1990	1910		IWR-1 2	1772	1892	1618	1760.67	0.921815	IWR-1 S.E.M	0.0302188	1.04731	FC S.E.M	0.0343328
		IWR-1 3	1806	1583	1839	1742.67		IWR-1 3	1724	1711	1605	1680	0.96404			1.09529
Fzd10			i	ii	iii	Mean			i	ii	iii	Mean	Relative expression (GOI/Tbp)		Mean (GOI/Tbp)	Fold change			T-test
		Control 1	1668	1815	1572	1685		Control 1	1285	1263	1197	1248.33	0.740851	Control Mean	0.703064
		Control 2	1885	1757	1890	1844		Control 2	1311	1293	1279	1294.33	0.701916	Control S.E.M	0.0214926
		Control 3	2230	2319	2337	2295.33		Control 3	1378	1608	1603	1529.67	0.666425
		IWR-1 1	1784	1755	1793	1777.33		IWR-1 1	451.2	457.1	465.8	458.033	0.257708	IWR-1 Mean	0.324547	-2.72814	FC Mean	-2.16629	0.00068788
		IWR-1 2	1996	1744	1990	1910		IWR-1 2	656.1	649.8	711	672.3	0.35199	IWR-1 S.E.M	0.0335973	-1.9974	FC S.E.M	0.255218
		IWR-1 3	1806	1583	1839	1742.67		IWR-1 3	653.6	626.2	622.9	634.233	0.363944			-1.93179
Ror1			i	ii	iii	Mean			i	ii	iii	Mean	Relative expression (GOI/Tbp)		Mean (GOI/Tbp)	Fold change			T-test
		Control 1	1668	1815	1572	1685		Control 1	1573	1609	1817	1666.33	0.988922	Control Mean	0.713759
		Control 2	1885	1757	1890	1844		Control 2	929.7	1030	1045	1001.57	0.543149	Control S.E.M	0.138897
		Control 3	2230	2319	2337	2295.33		Control 3	1351	1227	1617	1398.33	0.609207
		IWR-1 1	1784	1755	1793	1777.33		IWR-1 1	1542	1339	1446	1442.33	0.811515	IWR-1 Mean	0.647396	-0.879539	FC Mean	-1.10251	0.701899
		IWR-1 2	1996	1744	1990	1910		IWR-1 2	1107	995.8	1145	1082.6	0.566806	IWR-1 S.E.M	0.0820639	-1.25926	FC S.E.M	0.127683
		IWR-1 3	1806	1583	1839	1742.67		IWR-1 3	935.6	1056	956.3	982.633	0.563868			-1.26583
Ror2			i	ii	iii	Mean			i	ii	iii	Mean	Relative expression (GOI/Tbp)		Mean (GOI/Tbp)	Fold change			T-test
		Control 1	1668	1815	1572	1685		Control 1	1265	1426	1363	1351.33	0.801978	Control Mean	0.620982
		Control 2	1885	1757	1890	1844		Control 2	879.5	800.6	929.9	870	0.4718	Control S.E.M	0.0966325
		Control 3	2230	2319	2337	2295.33		Control 3	1344	1343	1370	1352.33	0.589166
		IWR-1 1	1784	1755	1793	1777.33		IWR-1 1	686.4	744	758.1	729.5	0.410446	IWR-1 Mean	0.37333	-1.51294	FC Mean	-1.66336	0.0660544
		IWR-1 2	1996	1744	1990	1910		IWR-1 2	602.9	709.3	648.8	653.667	0.342234	IWR-1 S.E.M	0.01992	-1.8145	FC S.E.M	0.0875113
		IWR-1 3	1806	1583	1839	1742.67		IWR-1 3	706.4	629.4	584.5	640.1	0.367311			-1.69062
Dkk1			i	ii	iii	Mean			i	ii	iii	Mean	Relative expression (GOI/Tbp)		Mean (GOI/Tbp)	Fold change			T-test
		Control 1	1668	1815	1572	1685		Control 1	3216	3201	3380	3265.67	1.93808	Control Mean	2.35709
		Control 2	1885	1757	1890	1844		Control 2	3239	4135	4291	3888.33	2.10864	Control S.E.M	0.33734
		Control 3	2230	2319	2337	2295.33		Control 3	7054	7335	6438	6942.33	3.02454
		IWR-1 1	1784	1755	1793	1777.33		IWR-1 1	300	343	301.1	314.7	0.177063	IWR-1 Mean	0.161027	-13.3121	FC Mean	-14.6379	0.00290523
		IWR-1 2	1996	1744	1990	1910		IWR-1 2	340.6	337.5	443.3	373.8	0.195707	IWR-1 S.E.M	0.0259232	-12.044	FC S.E.M	2.91965
		IWR-1 3	1806	1583	1839	1742.67		IWR-1 3	103.2	224.3	249.2	192.233	0.11031			-21.3679
Dkk4			i	ii	iii	Mean			i	ii	iii	Mean	Relative expression (GOI/Tbp)		Mean (GOI/Tbp)	Fold change			T-test
		Control 1	1668	1815	1572	1685		Control 1	1203	1232	1126	1187	0.704451	Control Mean	0.761287
		Control 2	1885	1757	1890	1844		Control 2	1371	1302	1367	1346.67	0.730296	Control S.E.M	0.0445428
		Control 3	2230	2319	2337	2295.33		Control 3	2167	1811	1869	1949	0.849114
		IWR-1 1	1784	1755	1793	1777.33		IWR-1 1	25.43	18.2	30.41	24.68	0.013886	IWR-1 Mean	0.0174097	-54.8242	FC Mean	-43.7278	7.6402e-05
		IWR-1 2	1996	1744	1990	1910		IWR-1 2	22.56	62.44	58.05	47.6833	0.0249651	IWR-1 S.E.M	0.00378055	-30.4941	FC S.E.M	8.47835
		IWR-1 3	1806	1583	1839	1742.67		IWR-1 3	20.65	22.17	27.12	23.3133	0.013378			-56.9061

## Sheet: Fig 1D Heatmap production
Gene symbol	BMP4	LDN	FGF9	SU5402	CHIR	IWR1		BMP4	LDN	FGF9	SU5402	CHIR	IWR1
Bmp2	-7.13156	1.15104	-1.91761	1.99037	3.35921	-2.67272		7.13156	-1.15104	1.91761	-1.99037	-3.35921	2.67272
Bmp4	-2.77264	2.29444	-1.13723	-1.38181	3.65016	-1.50103		2.77264	-2.29444	1.13723	1.38181	-3.65016	1.50103
Rgma	-3.61981	1.0455	1.10458	-1.16106	1.02903	-1.13022		3.61981	-1.0455	-1.10458	1.16106	-1.02903	1.13022
Rgmb	-1.90159	-1.31327	-1.00049	1.0519	-1.4485	-1.4224		1.90159	1.31327	1.00049	-1.0519	1.4485	1.4224
Bambi	13.345	-1.26316	-1.13723	-1.15979	1.58593	-1.04193		-13.345	1.26316	1.13723	1.15979	-1.58593	1.04193
Ctgf	-1.43571	2.42531	-1.43042	-3.32132	-2.99047	-3.11341		1.43571	-2.42531	1.43042	3.32132	2.99047	3.11341
Tsku	-1.49953	-1.05597	-1.06717	-1.23561	1.54805	-1.46236		1.49953	1.05597	1.06717	1.23561	-1.54805	1.46236
Nog	18.3252	-9.80263	-1.09967	1.43019	1.53526	-1.686		-18.3252	9.80263	1.09967	-1.43019	-1.53526	1.686
Fgf7	-1.59573	-1.63625	-1.43421	1.21386	-2.46499	1.2429		1.59573	1.63625	1.43421	-1.21386	2.46499	-1.2429
Fgf9	-1.36199	-1.30539	-1.43621	1.11019	1.42725	-1.87592		1.36199	1.30539	1.43621	-1.11019	-1.42725	1.87592
Fgf10	-1.01722	-1.05695	-1.2927	1.02867	-6.7739	-1.14912		1.01722	1.05695	1.2927	-1.02867	6.7739	1.14912
Fgf18	-4.38301	1.32495	-1.4039	1.49469	-2.44497	1.28523		4.38301	-1.32495	1.4039	-1.49469	2.44497	-1.28523
Fgf20	-24.1404	1.17837	-2.81865	6.44921	7.89026	-2.76914		24.1404	-1.17837	2.81865	-6.44921	-7.89026	2.76914
Wnt5b	-1.29709	1.05582	-1.15243	-1.06979	1.2675	-1.22377		1.29709	-1.05582	1.15243	1.06979	-1.2675	1.22377
Wnt9a	1.05669	1.00784	-1.31583	-1.14867	-1.95349	-1.05857		-1.05669	-1.00784	1.31583	1.14867	1.95349	1.05857
Fzd1	1.5833	-1.38895	-1.52596	1.02478	-1.28	-1.33913		-1.5833	1.38895	1.52596	-1.02478	1.28	1.33913
Fzd2	-1.20689	-1.44002	-1.34171	-1.00819	-1.7125	-1.09571		1.20689	1.44002	1.34171	1.00819	1.7125	1.09571
Fzd4	-1.1317	-1.14128	-1.16219	-1.43867	1.66065	1.11635		1.1317	1.14128	1.16219	1.43867	-1.66065	-1.11635
Fzd7	1.75286	-1.49639	-1.06006	1.05588	1.3011	-1.76936		-1.75286	1.49639	1.06006	-1.05588	-1.3011	1.76936
Fzd8	-1.32618	-1.37603	-1.11416	1.09762	-1.08358	1.10271		1.32618	1.37603	1.11416	-1.09762	1.08358	-1.10271
Fzd10	-4.50462	1.07041	-1.19097	-1.30689	-1.4264	-2.16629		4.50462	-1.07041	1.19097	1.30689	1.4264	2.16629
Ror1	-1.64603	-1.24145	-1.0848	1.11388	1.07679	-1.10251		1.64603	1.24145	1.0848	-1.11388	-1.07679	1.10251
Ror2	1.15854	-1.09007	1.10134	-1.08275	1.87302	-1.66336		-1.15854	1.09007	-1.10134	1.08275	-1.87302	1.66336
Dkk1	2.57919	-5.30328	1.13483	-6.84706	5.14554	-14.6379		-2.57919	5.30328	-1.13483	6.84706	-5.14554	14.6379
Dkk4	-242.829	3.29342	-4.92333	-13.0429	15.4045	-43.7278		242.829	-3.29342	4.92333	13.0429	-15.4045	43.7278
						Positive transform
Bmp2	#NUM!	0.0610893	#NUM!	0.298935	0.526237	#NUM!		0.853184	#NUM!	0.28276	#NUM!	#NUM!	0.426954		-0.853184	0.0610893	-0.28276	0.298935	0.526237	-0.426954
Bmp4	#NUM!	0.360677	#NUM!	#NUM!	0.562312	#NUM!		0.442893	#NUM!	0.0558467	0.140447	#NUM!	0.17639		-0.442893	0.360677	-0.0558467	-0.140447	0.562312	-0.17639
Rgma	#NUM!	0.0193245	0.0431978	#NUM!	0.0124286	#NUM!		0.558686	#NUM!	#NUM!	0.0648547	#NUM!	0.0531622		-0.558686	0.0193245	0.0431978	-0.0648547	0.0124286	-0.0531622
Rgmb	#NUM!	#NUM!	#NUM!	0.0219757	#NUM!	#NUM!		0.279117	0.118354	0.000214216	#NUM!	0.160918	0.153022		-0.279117	-0.118354	-0.000214216	0.0219757	-0.160918	-0.153022
Bambi	1.12532	#NUM!	#NUM!	#NUM!	0.200283	#NUM!		#NUM!	0.101458	0.0558467	0.0643796	#NUM!	0.0178394		1.12532	-0.101458	-0.0558467	-0.0643796	0.200283	-0.0178394
Ctgf	#NUM!	0.384766	#NUM!	#NUM!	#NUM!	#NUM!		0.157067	#NUM!	0.155462	0.521311	0.475739	0.493236		-0.157067	0.384766	-0.155462	-0.521311	-0.475739	-0.493236
Tsku	#NUM!	#NUM!	#NUM!	#NUM!	0.189785	#NUM!		0.175954	0.0236516	0.0282345	0.0918805	#NUM!	0.165055		-0.175954	-0.0236516	-0.0282345	-0.0918805	0.189785	-0.165055
Noggin	1.26305	#NUM!	#NUM!	0.155394	0.186181	#NUM!		#NUM!	0.991343	0.0412612	#NUM!	#NUM!	0.226857		1.26305	-0.991343	-0.0412612	0.155394	0.186181	-0.226857
Fgf7	#NUM!	#NUM!	#NUM!	0.0841687	#NUM!	0.094435		0.202959	0.21385	0.156613	#NUM!	0.391816	#NUM!		-0.202959	-0.21385	-0.156613	0.0841687	-0.391816	0.094435
Fgf9	#NUM!	#NUM!	#NUM!	0.0453971	0.154501	#NUM!		0.134175	0.115742	0.157217	#NUM!	#NUM!	0.273213		-0.134175	-0.115742	-0.157217	0.0453971	0.154501	-0.273213
Fgf10	#NUM!	#NUM!	#NUM!	0.0122753	#NUM!	#NUM!		0.00741665	0.0240545	0.111497	#NUM!	0.830839	0.0603667		-0.00741665	-0.0240545	-0.111497	0.0122753	-0.830839	-0.0603667
Fgf18	#NUM!	0.122201	#NUM!	0.174552	#NUM!	0.108981		0.641773	#NUM!	0.147336	#NUM!	0.388273	#NUM!		-0.641773	0.122201	-0.147336	0.174552	-0.388273	0.108981
Fgf20	#NUM!	0.0712828	#NUM!	0.809506	0.897091	#NUM!		1.38274	#NUM!	0.450041	#NUM!	#NUM!	0.442346		-1.38274	0.0712828	-0.450041	0.809506	0.897091	-0.442346
Wnt5b	#NUM!	0.0235884	#NUM!	#NUM!	0.102948	#NUM!		0.11297	#NUM!	0.0616151	0.0292965	#NUM!	0.0877007		-0.11297	0.0235884	-0.0616151	-0.0292965	0.102948	-0.0877007
Wnt9a	0.0239459	0.00339356	#NUM!	#NUM!	#NUM!	#NUM!		#NUM!	#NUM!	0.119198	0.0601958	0.290811	0.0247187		0.0239459	0.00339356	-0.119198	-0.0601958	-0.290811	-0.0247187
Fzd1	0.199564	#NUM!	#NUM!	0.010631	#NUM!	#NUM!		#NUM!	0.142686	0.183542	#NUM!	0.107212	0.126823		0.199564	-0.142686	-0.183542	0.010631	-0.107212	-0.126823
Fzd2	#NUM!	#NUM!	#NUM!	#NUM!	#NUM!	#NUM!		0.0816683	0.158368	0.127659	0.00354192	0.233632	0.0396953		-0.0816683	-0.158368	-0.127659	-0.00354192	-0.233632	-0.0396953
Fzd4	#NUM!	#NUM!	#NUM!	#NUM!	0.220279	0.0477986		0.0537324	0.0573939	0.0652772	0.157962	#NUM!	#NUM!		-0.0537324	-0.0573939	-0.0652772	-0.157962	0.220279	0.0477986
Fzd7	0.243748	#NUM!	#NUM!	0.023614	0.114312	#NUM!		#NUM!	0.175044	0.025329	#NUM!	#NUM!	0.247817		0.243748	-0.175044	-0.025329	0.023614	0.114312	-0.247817
Fzd8	#NUM!	#NUM!	#NUM!	0.0404515	#NUM!	0.0424631		0.122603	0.138626	0.0469477	#NUM!	0.0348625	#NUM!		-0.122603	-0.138626	-0.0469477	0.0404515	-0.0348625	0.0424631
Fzd10	#NUM!	0.0295501	#NUM!	#NUM!	#NUM!	#NUM!		0.653658	#NUM!	0.0759025	0.11624	0.154242	0.335717		-0.653658	0.0295501	-0.0759025	-0.11624	-0.154242	-0.335717
Ror1	#NUM!	#NUM!	#NUM!	0.0468403	0.0321294	#NUM!		0.216438	0.0939307	0.0353508	#NUM!	#NUM!	0.0423815		-0.216438	-0.0939307	-0.0353508	0.0468403	0.0321294	-0.0423815
Ror2	0.0639106	#NUM!	0.0419211	#NUM!	0.272542	#NUM!		#NUM!	0.0374526	#NUM!	0.0345269	#NUM!	0.220986		0.0639106	-0.0374526	0.0419211	-0.0345269	0.272542	-0.220986
Dkk1	0.411483	#NUM!	0.0549299	#NUM!	0.711431	#NUM!		#NUM!	0.724544	#NUM!	0.835504	#NUM!	1.16548		0.411483	-0.724544	0.0549299	-0.835504	0.711431	-1.16548
Dkk4	#NUM!	0.517647	#NUM!	#NUM!	1.18765	#NUM!		2.3853	#NUM!	0.692259	1.11538	#NUM!	1.64076		-2.3853	0.517647	-0.692259	-1.11538	1.18765	-1.64076					Log2 transform
Bmp2	#NUM!	0.202934	#NUM!	0.99304	1.74812	#NUM!		2.83422	#NUM!	0.939309	#NUM!	#NUM!	1.41831		-2.83422	0.202934	-0.939309	0.99304	1.74812	-1.41831		Bmp2	-2.83422	0.202934	-0.939309	0.99304	1.74812	-1.41831		-2.83422	0.202934		-0.939309	0.99304		1.74812	-1.41831
Bmp4	#NUM!	1.19814	#NUM!	#NUM!	1.86796	#NUM!		1.47126	#NUM!	0.185519	0.466556	#NUM!	0.585955		-1.47126	1.19814	-0.185519	-0.466556	1.86796	-0.585955		Bmp4	-1.47126	1.19814	-0.185519	-0.466556	1.86796	-0.585955		-1.47126	1.19814		-0.185519	-0.466556		1.86796	-0.585955
Rgma	#NUM!	0.0641946	0.1435	#NUM!	0.0412869	#NUM!		1.85591	#NUM!	#NUM!	0.215443	#NUM!	0.176601		-1.85591	0.0641946	0.1435	-0.215443	0.0412869	-0.176601		Rgma	-1.85591	0.0641946	0.1435	-0.215443	0.0412869	-0.176601		-1.85591	0.0641946		0.1435	-0.215443		0.0412869	-0.176601
Rgmb	#NUM!	#NUM!	#NUM!	0.0730018	#NUM!	#NUM!		0.927207	0.393162	0.000711609	#NUM!	0.534558	0.50833		-0.927207	-0.393162	-0.000711609	0.0730018	-0.534558	-0.50833		Rgmb	-0.927207	-0.393162	-0.000711609	0.0730018	-0.534558	-0.50833		-0.927207	-0.393162		-0.000711609	0.0730018		-0.534558	-0.50833
Bambi	3.73823	#NUM!	#NUM!	#NUM!	0.665325	#NUM!		#NUM!	0.337035	0.185519	0.213864	#NUM!	0.0592613		3.73823	-0.337035	-0.185519	-0.213864	0.665325	-0.0592613		Bambi	3.73823	-0.337035	-0.185519	-0.213864	0.665325	-0.0592613		3.73823	-0.337035		-0.185519	-0.213864		0.665325	-0.0592613
Ctgf	#NUM!	1.27817	#NUM!	#NUM!	#NUM!	#NUM!		0.521767	#NUM!	0.516435	1.73176	1.58037	1.63849		-0.521767	1.27817	-0.516435	-1.73176	-1.58037	-1.63849		Ctgf	-0.521767	1.27817	-0.516435	-1.73176	-1.58037	-1.63849		-0.521767	1.27817		-0.516435	-1.73176		-1.58037	-1.63849
Tsku	#NUM!	#NUM!	#NUM!	#NUM!	0.630452	#NUM!		0.584507	0.078569	0.0937929	0.30522	#NUM!	0.5483		-0.584507	-0.078569	-0.0937929	-0.30522	0.630452	-0.5483		Tsku	-0.584507	-0.078569	-0.0937929	-0.30522	0.630452	-0.5483		-0.584507	-0.078569		-0.0937929	-0.30522		0.630452	-0.5483
Noggin	4.19575	#NUM!	#NUM!	0.516208	0.618478	#NUM!		#NUM!	3.29317	0.137067	#NUM!	#NUM!	0.753601		4.19575	-3.29317	-0.137067	0.516208	0.618478	-0.753601		Nog	4.19575	-3.29317	-0.137067	0.516208	0.618478	-1.09351		4.19575	-3.29317		-0.137067	0.516208		0.618478	-1.09351
Fgf7	#NUM!	#NUM!	#NUM!	0.279602	#NUM!	0.313706		0.674215	0.710396	0.520258	#NUM!	1.30158	#NUM!		-0.674215	-0.710396	-0.520258	0.279602	-1.30158	0.313706		Fgf7	-0.674215	-0.710396	-0.520258	0.279602	-1.30158	0.313706		-0.674215	-0.710396		-0.520258	0.279602		-1.30158	0.313706
Fgf9	#NUM!	#NUM!	#NUM!	0.150806	0.513242	#NUM!		0.445718	0.384485	0.522265	#NUM!	#NUM!	0.907595		-0.445718	-0.384485	-0.522265	0.150806	0.513242	-0.907595		Fgf9	-0.445718	-0.384485	-0.522265	0.150806	0.513242	-0.907595		-0.445718	-0.384485		-0.522265	0.150806		0.513242	-0.907595
Fgf10	#NUM!	#NUM!	#NUM!	0.0407776	#NUM!	#NUM!		0.0246376	0.0799075	0.370386	#NUM!	2.75999	0.200534		-0.0246376	-0.0799075	-0.370386	0.0407776	-2.75999	-0.200534		Fgf10	-0.0246376	-0.0799075	-0.370386	0.0407776	-2.75999	-0.200534		-0.0246376	-0.0799075		-0.370386	0.0407776		-2.75999	-0.200534
Fgf18	#NUM!	0.405942	#NUM!	0.57985	#NUM!	0.362028		2.13192	#NUM!	0.489438	#NUM!	1.28982	#NUM!		-2.13192	0.405942	-0.489438	0.57985	-1.28982	0.362028		Fgf18	-2.13192	0.405942	-0.489438	0.57985	-1.28982	0.362028		-2.13192	0.405942		-0.489438	0.57985		-1.28982	0.362028
Fgf20	#NUM!	0.236796	#NUM!	2.68912	2.98007	#NUM!		4.59338	#NUM!	1.495	#NUM!	#NUM!	1.46944		-4.59338	0.236796	-1.495	2.68912	2.98007	-1.46944		Fgf20	-4.59338	0.236796	-1.495	2.68912	2.98007	-1.46944		-4.59338	0.236796		-1.495	2.68912		2.98007	-1.46944
Wnt5b	#NUM!	0.078359	#NUM!	#NUM!	0.341986	#NUM!		0.37528	#NUM!	0.204681	0.0973209	#NUM!	0.291335		-0.37528	0.078359	-0.204681	-0.0973209	0.341986	-0.291335		Wnt5b	-0.37528	0.078359	-0.204681	-0.0973209	0.341986	-0.291335		-0.37528	0.078359		-0.204681	-0.0973209		0.341986	-0.291335
Wnt9a	0.0795464	0.0112732	#NUM!	#NUM!	#NUM!	#NUM!		#NUM!	#NUM!	0.395968	0.199966	0.966052	0.0821139		0.0795464	0.0112732	-0.395968	-0.199966	-0.966052	-0.0821139		Wnt9a	0.0795464	0.0112732	-0.395968	-0.199966	-0.966052	-0.0821139		0.0795464	0.0112732		-0.395968	-0.199966		-0.966052	-0.0821139
Fzd1	0.662936	#NUM!	#NUM!	0.0353154	#NUM!	#NUM!		#NUM!	0.473992	0.609714	#NUM!	0.356149	0.421297		0.662936	-0.473992	-0.609714	0.0353154	-0.356149	-0.421297		Fzd1	0.662936	-0.473992	-0.450333	0.0353154	-0.356149	-0.421297		0.662936	-0.473992		-0.450333	0.0353154		-0.356149	-0.421297
Fzd2	#NUM!	#NUM!	#NUM!	#NUM!	#NUM!	#NUM!		0.271296	0.526089	0.424074	0.011766	0.776108	0.131865		-0.271296	-0.526089	-0.424074	-0.011766	-0.776108	-0.131865		Fzd2	-0.271296	-0.526089	-0.424074	-0.011766	-0.776108	-0.131865		-0.271296	-0.526089		-0.424074	-0.011766		-0.776108	-0.131865
Fzd4	#NUM!	#NUM!	#NUM!	#NUM!	0.73175	0.158783		0.178495	0.190658	0.216846	0.524738	#NUM!	#NUM!		-0.178495	-0.190658	-0.216846	-0.524738	0.73175	0.158783		Fzd4	-0.178495	-0.190658	-0.216846	-0.524738	0.73175	0.158783		-0.178495	-0.190658		-0.216846	-0.524738		0.73175	0.158783
Fzd7	0.809715	#NUM!	#NUM!	0.0784441	0.379736	#NUM!		#NUM!	0.581483	0.084141	#NUM!	#NUM!	0.823231		0.809715	-0.581483	-0.084141	0.0784441	0.379736	-0.823231		Fzd7	0.809715	-0.581483	-0.084141	0.0784441	0.379736	-0.823231		0.809715	-0.581483		-0.084141	0.0784441		0.379736	-0.823231
Fzd8	#NUM!	#NUM!	#NUM!	0.134377	#NUM!	0.141059		0.407279	0.460507	0.155957	#NUM!	0.115811	#NUM!		-0.407279	-0.460507	-0.155957	0.134377	-0.115811	0.141059		Fzd8	-0.407279	-0.460507	-0.155957	0.134377	-0.115811	0.141059		-0.407279	-0.460507		-0.155957	0.134377		-0.115811	0.141059
Fzd10	#NUM!	0.0981634	#NUM!	#NUM!	#NUM!	#NUM!		2.17141	#NUM!	0.252143	0.38614	0.512382	1.11523		-2.17141	0.0981634	-0.252143	-0.38614	-0.512382	-1.11523		Fzd10	-2.17141	0.0981634	-0.252143	-0.38614	-0.512382	-1.11523		-2.17141	0.0981634		-0.252143	-0.38614		-0.512382	-1.11523
Ror1	#NUM!	#NUM!	#NUM!	0.1556	0.106732	#NUM!		0.71899	0.312031	0.117433	#NUM!	#NUM!	0.140788		-0.71899	-0.312031	-0.117433	0.1556	0.106732	-0.140788		Ror1	-0.71899	-0.312031	-0.117433	0.1556	0.106732	-0.140788		-0.71899	-0.312031		-0.117433	0.1556		0.106732	-0.140788
Ror2	0.212306	#NUM!	0.139259	#NUM!	0.905366	#NUM!		#NUM!	0.124415	#NUM!	0.114696	#NUM!	0.734098		0.212306	-0.124415	0.139259	-0.114696	0.905366	-0.734098		Ror2	0.212306	-0.124415	0.139259	-0.114696	0.905366	-0.734098		0.212306	-0.124415		0.139259	-0.114696		0.905366	-0.734098
Dkk1	1.36692	#NUM!	0.182473	#NUM!	2.36332	#NUM!		#NUM!	2.40688	#NUM!	2.77548	#NUM!	3.87164		1.36692	-2.40688	0.182473	-2.77548	2.36332	-3.87164		Dkk1	1.36692	-2.40688	0.182473	-2.77548	2.36332	-3.87164		1.36692	-2.40688		0.182473	-2.77548		2.36332	-3.87164
Dkk4	#NUM!	1.71959	#NUM!	#NUM!	3.94528	#NUM!		7.92379	#NUM!	2.29963	3.7052	#NUM!	5.45048		-7.92379	1.71959	-2.29963	-3.7052	3.94528	-5.45048		Dkk4	-7.92379	1.71959	-2.29963	-3.7052	3.94528	-5.45048		-7.92379	1.71959		-2.29963	-3.7052		3.94528	-5.45048
																							-10	-1	-0.25	0.25	1	10
																							10	1	0.25	0.25	1	10

## Sheet: Fig S4A FGF9 epi and der
Tbp
Well	Quantity (copies)			Mean		Quantity (copies)			Mean	Etv5/Tbp			Mean	S.E.M	T-test
												Control epidermis	0.976269	0.0772353
Control 1 epidermis	3849	3763	3748	3786.67		3401	3123	3319	3281	0.866461		Control dermis	0.862179	0.150752
Control 2 epidermis	3666	3836	3497	3666.33		3399	3349	3559	3435.67	0.937085		FGF9 epidermis	2.38793	0.272263	0.00755378
Control 3 epidermis	3024	3149	2920	3031		3444	3415	3373	3410.67	1.12526		FGF9 dermis	1.90809	0.0834364	0.00372026
Control 1 dermis	2457	2337	2287	2360.33		1946	1948	1923	1939	0.821494
Control 2 dermis	2834	2646	2537	2672.33		1702	1616	1683	1667	0.623799
Control 3 dermis	2191	2025	1979	2065		2352	2378	2340	2356.67	1.14124
FGF9 1 epidermis	3336	2949	3109	3131.33		8926	8730	8325	8660.33	2.7657
FGF9 2 epidermis	3276	3355	3360	3330.33		8263	8731	8370	8454.67	2.53868
FGF9 3 epidermis	3797	3669	3837	3767.67		6973	7187	6857	7005.67	1.85942
FGF9 1 dermis	2787	2582	2577	2648.67		4752	4942	5039	4911	1.85414
FGF9 2 dermis	2609	2524	2567	2566.67		5340	5244	5369	5317.67	2.07182
FGF9 3 dermis	2553	2212	2558	2441		4387	4475	4307	4389.67	1.79831
