# Supplementary material for: Hierarchical patterning modes orchestrate hair follicle morphogenesis
Source: PLoS Biol. 2017 Jul 11;15(7):e2002117. doi: 10.1371/journal.pbio.2002117 (PMC5507405; doi:10.1371/journal.pbio.2002117)
Supplement: S1 Table — Transcript names are in coloured text according to the pathway in which they operate: BMP (green), WNT (red), FGF (blue). (XLSX) [file pbio.2002117.s010.xlsx]

## Sheet: Sheet1
	Epidermis		Dermis
Gene name	t0 transcript abundance	t1/2 (min)	t0 transcript abundance	t1/2 (min)
Bambi	0.009	50	0.015	37
Bmp2	0.039	64	0.005	64
Bmp4	0.004	88	0.025	35
Ctgf	0.01	35	0.009	55
Nog	0.006	49	0.007	61
Rgma	0.046	60	0.042	44
Rgmb	0.305	112	0.061	62
Tsku	0.004	61	0.008	50
Dkk1			0.031	37
Dkk4	0.123	83
Fzd1	0.026	75	0.053	68
Fzd2	0.101	78	0.151	105
Fzd4	0.002	152	0.024	89
Fzd7	0.023	71	0.017	69
Fzd8	0.008	66	0.005	36
Fzd10	0.649	45	0.039	48
Ror1	0.002	77	0.011	68
Ror2			0.032	79
Wnt5b	0.003	69	0.003	119
Wnt9a	0.002	202	0.003	85
Fgf7			0.011	53
Fgf9			0.004	78
Fgf10			0.007	80
Fgf18			0.008	71
Fgf20	0.012	68
