# Supplementary material for: Hierarchical patterning modes orchestrate hair follicle morphogenesis
Source: PLoS Biol. 2017 Jul 11;15(7):e2002117. doi: 10.1371/journal.pbio.2002117 (PMC5507405; doi:10.1371/journal.pbio.2002117)
Supplement: S2 Data — (XLSX) [file pbio.2002117.s014.xlsx]

## Sheet: Fig 2B,C,D control raw tracks
	Image ID	Track	Slice	X	Y	Follicle_COMX	Follicle_COMY	Distance from COM	Inside?
1	Registered_Pos01_Processed_Follicle_01.tif	1	1	148	82	153.929	127.271	45.658	Yes
2	Registered_Pos01_Processed_Follicle_01.tif	1	2	148	83	153.929	127.271	44.6666	Yes
3	Registered_Pos01_Processed_Follicle_01.tif	1	3	149	86	153.929	127.271	41.5646	Yes
4	Registered_Pos01_Processed_Follicle_01.tif	1	4	147	84	153.929	127.271	43.8226	Yes
5	Registered_Pos01_Processed_Follicle_01.tif	1	5	150	83	153.929	127.271	44.4454	Yes
6	Registered_Pos01_Processed_Follicle_01.tif	1	6	150	86	153.929	127.271	41.4579	Yes
7	Registered_Pos01_Processed_Follicle_01.tif	1	7	151	86	153.929	127.271	41.3752	Yes
8	Registered_Pos01_Processed_Follicle_01.tif	1	8	152	89	153.929	127.271	38.3199	Yes
9	Registered_Pos01_Processed_Follicle_01.tif	1	9	152	94	153.929	127.271	33.3272	Yes
10	Registered_Pos01_Processed_Follicle_01.tif	1	10	154	96	153.929	127.271	31.2714	Yes
11	Registered_Pos01_Processed_Follicle_01.tif	1	11	155	98	153.929	127.271	29.2909	Yes
12	Registered_Pos01_Processed_Follicle_01.tif	1	12	152	99	153.929	127.271	28.3371	Yes
13	Registered_Pos01_Processed_Follicle_01.tif	1	13	152	99	153.929	127.271	28.3371	Yes
14	Registered_Pos01_Processed_Follicle_01.tif	1	14	152	102	153.929	127.271	25.3449	Yes
15	Registered_Pos01_Processed_Follicle_01.tif	1	15	149	102	153.929	127.271	25.7476	Yes
16	Registered_Pos01_Processed_Follicle_01.tif	1	16	150	102	153.929	127.271	25.575	Yes
17	Registered_Pos01_Processed_Follicle_01.tif	1	17	150	103	153.929	127.271	24.5873	Yes
18	Registered_Pos01_Processed_Follicle_01.tif	1	18	150	103	153.929	127.271	24.5873	Yes
19	Registered_Pos01_Processed_Follicle_01.tif	1	19	150	102	153.929	127.271	25.575	Yes
20	Registered_Pos01_Processed_Follicle_01.tif	1	20	150	102	153.929	127.271	25.575	Yes
21	Registered_Pos01_Processed_Follicle_01.tif	1	21	150	104	153.929	127.271	23.6007	Yes
22	Registered_Pos01_Processed_Follicle_01.tif	1	22	149	107	153.929	127.271	20.862	Yes
23	Registered_Pos01_Processed_Follicle_01.tif	1	23	148	107	153.929	127.271	21.1206	Yes
24	Registered_Pos01_Processed_Follicle_01.tif	1	24	147	107	153.929	127.271	21.4229	Yes
25	Registered_Pos01_Processed_Follicle_01.tif	1	25	148	108	153.929	127.271	20.1628	Yes
26	Registered_Pos01_Processed_Follicle_01.tif	1	26	147	109	153.929	127.271	19.5411	Yes
27	Registered_Pos01_Processed_Follicle_01.tif	1	27	145	109	153.929	127.271	20.3364	Yes
28	Registered_Pos01_Processed_Follicle_01.tif	1	28	143	111	153.929	127.271	19.6011	Yes
29	Registered_Pos01_Processed_Follicle_01.tif	1	29	143	113	153.929	127.271	17.9755	Yes
30	Registered_Pos01_Processed_Follicle_01.tif	1	30	142	114	153.929	127.271	17.8447	Yes
31	Registered_Pos01_Processed_Follicle_01.tif	1	31	143	115	153.929	127.271	16.4326	Yes
32	Registered_Pos01_Processed_Follicle_01.tif	1	32	143	115	153.929	127.271	16.4326	Yes
33	Registered_Pos01_Processed_Follicle_01.tif	1	33	143	114	153.929	127.271	17.1923	Yes
34	Registered_Pos01_Processed_Follicle_01.tif	1	34	143	114	153.929	127.271	17.1923	Yes
35	Registered_Pos01_Processed_Follicle_01.tif	1	35	143	114	153.929	127.271	17.1923	Yes
36	Registered_Pos01_Processed_Follicle_01.tif	1	36	143	116	153.929	127.271	15.7	Yes
37	Registered_Pos01_Processed_Follicle_01.tif	1	37	144	119	153.929	127.271	12.9229	Yes
38	Registered_Pos01_Processed_Follicle_01.tif	1	38	156	124	153.929	127.271	3.8717	Yes
39	Registered_Pos01_Processed_Follicle_01.tif	1	39	156	124	153.929	127.271	3.8717	Yes
40	Registered_Pos01_Processed_Follicle_01.tif	1	40	158	125	153.929	127.271	4.6617	Yes
41	Registered_Pos01_Processed_Follicle_01.tif	1	41	160	126	153.929	127.271	6.2026	Yes
42	Registered_Pos01_Processed_Follicle_01.tif	1	42	161	129	153.929	127.271	7.2791	Yes
43	Registered_Pos01_Processed_Follicle_01.tif	1	43	162	128	153.929	127.271	8.1037	Yes
44	Registered_Pos01_Processed_Follicle_01.tif	1	44	163	128	153.929	127.271	9.1001	Yes
45	Registered_Pos01_Processed_Follicle_01.tif	1	45	163	128	153.929	127.271	9.1001	Yes
46	Registered_Pos01_Processed_Follicle_01.tif	1	46	164	128	153.929	127.271	10.0972	Yes
47	Registered_Pos01_Processed_Follicle_01.tif	1	47	164	128	153.929	127.271	10.0972	Yes
48	Registered_Pos01_Processed_Follicle_01.tif	1	48	164	128	153.929	127.271	10.0972	Yes
49	Registered_Pos01_Processed_Follicle_01.tif	1	49	164	128	153.929	127.271	10.0972	Yes
50	Registered_Pos01_Processed_Follicle_01.tif	1	50	163	128	153.929	127.271	9.1001	Yes
51	Registered_Pos01_Processed_Follicle_01.tif	1	51	163	127	153.929	127.271	9.0749	Yes
52	Registered_Pos01_Processed_Follicle_01.tif	1	52	165	127	153.929	127.271	11.0742	Yes
53	Registered_Pos01_Processed_Follicle_01.tif	1	53	165	126	153.929	127.271	11.1436	Yes
54	Registered_Pos01_Processed_Follicle_01.tif	1	54	164	128	153.929	127.271	10.0972	Yes
55	Registered_Pos01_Processed_Follicle_01.tif	1	55	164	128	153.929	127.271	10.0972	Yes
56	Registered_Pos01_Processed_Follicle_01.tif	1	56	166	128	153.929	127.271	12.0929	Yes
57	Registered_Pos01_Processed_Follicle_01.tif	1	57	166	130	153.929	127.271	12.3754	Yes
58	Registered_Pos01_Processed_Follicle_01.tif	1	58	166	130	153.929	127.271	12.3754	Yes
59	Registered_Pos01_Processed_Follicle_01.tif	1	59	166	130	153.929	127.271	12.3754	Yes
60	Registered_Pos01_Processed_Follicle_01.tif	1	60	173	127	153.929	127.271	19.0728	Yes
61	Registered_Pos01_Processed_Follicle_01.tif	1	61	170	127	153.929	127.271	16.0732	Yes
62	Registered_Pos01_Processed_Follicle_01.tif	1	62	168	125	153.929	127.271	14.253	Yes
63	Registered_Pos01_Processed_Follicle_01.tif	1	63	168	125	153.929	127.271	14.253	Yes
64	Registered_Pos01_Processed_Follicle_01.tif	1	64	170	126	153.929	127.271	16.1211	Yes
65	Registered_Pos01_Processed_Follicle_01.tif	1	65	166	127	153.929	127.271	12.0739	Yes
66	Registered_Pos01_Processed_Follicle_01.tif	1	66	164	126	153.929	127.271	10.1508	Yes
67	Registered_Pos01_Processed_Follicle_01.tif	1	67	164	126	153.929	127.271	10.1508	Yes
68	Registered_Pos01_Processed_Follicle_01.tif	1	68	164	126	153.929	127.271	10.1508	Yes
69	Registered_Pos01_Processed_Follicle_01.tif	1	69	164	126	153.929	127.271	10.1508	Yes
70	Registered_Pos01_Processed_Follicle_01.tif	1	70	159	124	153.929	127.271	6.0345	Yes
71	Registered_Pos01_Processed_Follicle_01.tif	1	71	161	125	153.929	127.271	7.4267	Yes
72	Registered_Pos01_Processed_Follicle_01.tif	1	72	159	124	153.929	127.271	6.0345	Yes
73	Registered_Pos01_Processed_Follicle_01.tif	1	73	159	126	153.929	127.271	5.2278	Yes
74	Registered_Pos01_Processed_Follicle_01.tif	1	74	160	129	153.929	127.271	6.3122	Yes
75	Registered_Pos01_Processed_Follicle_01.tif	1	75	163	128	153.929	127.271	9.1001	Yes
76	Registered_Pos01_Processed_Follicle_01.tif	1	76	161	124	153.929	127.271	7.791	Yes
77	Registered_Pos01_Processed_Follicle_01.tif	1	77	160	125	153.929	127.271	6.4819	Yes
78	Registered_Pos01_Processed_Follicle_01.tif	1	78	166	124	153.929	127.271	12.5063	Yes
79	Registered_Pos01_Processed_Follicle_01.tif	1	79	164	127	153.929	127.271	10.0745	Yes
80	Registered_Pos01_Processed_Follicle_01.tif	1	80	163	128	153.929	127.271	9.1001	Yes
81	Registered_Pos01_Processed_Follicle_01.tif	1	81	158	131	153.929	127.271	5.5204	Yes
82	Registered_Pos01_Processed_Follicle_01.tif	1	82	160	136	153.929	127.271	10.6323	Yes
83	Registered_Pos01_Processed_Follicle_01.tif	1	83	163	138	153.929	127.271	14.0494	Yes
84	Registered_Pos01_Processed_Follicle_01.tif	1	84	164	141	153.929	127.271	17.0264	Yes
85	Registered_Pos01_Processed_Follicle_01.tif	1	85	169	143	153.929	127.271	21.7835	Yes
86	Registered_Pos01_Processed_Follicle_01.tif	1	86	169	143	153.929	127.271	21.7835	Yes
87	Registered_Pos01_Processed_Follicle_01.tif	1	87	172	143	153.929	127.271	23.9572	Yes
88	Registered_Pos01_Processed_Follicle_01.tif	1	88	173	138	153.929	127.271	21.8816	Yes
89	Registered_Pos01_Processed_Follicle_01.tif	1	89	172	136	153.929	127.271	20.0685	Yes
90	Registered_Pos01_Processed_Follicle_01.tif	1	90	161	132	153.929	127.271	8.5063	Yes
91	Registered_Pos01_Processed_Follicle_01.tif	1	91	163	128	153.929	127.271	9.1001	Yes
92	Registered_Pos01_Processed_Follicle_01.tif	1	92	163	126	153.929	127.271	9.1595	Yes
93	Registered_Pos01_Processed_Follicle_01.tif	1	93	162	125	153.929	127.271	8.3844	Yes
94	Registered_Pos01_Processed_Follicle_01.tif	1	94	164	121	153.929	127.271	11.8639	Yes
95	Registered_Pos01_Processed_Follicle_01.tif	1	95	162	121	153.929	127.271	10.221	Yes
96	Registered_Pos01_Processed_Follicle_01.tif	1	96	162	121	153.929	127.271	10.221	Yes
97	Registered_Pos01_Processed_Follicle_01.tif	1	97	162	121	153.929	127.271	10.221	Yes
98	Registered_Pos01_Processed_Follicle_01.tif	1	98	164	122	153.929	127.271	11.367	Yes
99	Registered_Pos01_Processed_Follicle_01.tif	1	99	162	124	153.929	127.271	8.7087	Yes
100	Registered_Pos01_Processed_Follicle_01.tif	1	100	162	122	153.929	127.271	9.6398	Yes
101	Registered_Pos01_Processed_Follicle_01.tif	1	101	165	123	153.929	127.271	11.8663	Yes
102	Registered_Pos01_Processed_Follicle_01.tif	1	102	167	123	153.929	127.271	13.7511	Yes
103	Registered_Pos01_Processed_Follicle_01.tif	1	103	162	124	153.929	127.271	8.7087	Yes
104	Registered_Pos01_Processed_Follicle_01.tif	1	104	165	124	153.929	127.271	11.5441	Yes
105	Registered_Pos01_Processed_Follicle_01.tif	1	105	164	124	153.929	127.271	10.5889	Yes
106	Registered_Pos01_Processed_Follicle_01.tif	1	106	164	124	153.929	127.271	10.5889	Yes
107	Registered_Pos01_Processed_Follicle_01.tif	1	107	164	124	153.929	127.271	10.5889	Yes
108	Registered_Pos01_Processed_Follicle_01.tif	1	108	164	124	153.929	127.271	10.5889	Yes
109	Registered_Pos01_Processed_Follicle_01.tif	1	109	164	124	153.929	127.271	10.5889	Yes
110	Registered_Pos01_Processed_Follicle_01.tif	1	110	164	124	153.929	127.271	10.5889	Yes
111	Registered_Pos01_Processed_Follicle_01.tif	1	111	164	124	153.929	127.271	10.5889	Yes
112	Registered_Pos01_Processed_Follicle_01.tif	1	112	166	122	153.929	127.271	13.1717	Yes
113	Registered_Pos01_Processed_Follicle_01.tif	1	113	166	120	153.929	127.271	14.0918	Yes
114	Registered_Pos01_Processed_Follicle_01.tif	1	114	166	120	153.929	127.271	14.0918	Yes
115	Registered_Pos01_Processed_Follicle_01.tif	1	115	166	120	153.929	127.271	14.0918	Yes
116	Registered_Pos01_Processed_Follicle_01.tif	1	116	166	120	153.929	127.271	14.0918	Yes
117	Registered_Pos01_Processed_Follicle_01.tif	1	117	163	117	153.929	127.271	13.7033	Yes
118	Registered_Pos01_Processed_Follicle_01.tif	1	118	161	117	153.929	127.271	12.4699	Yes
119	Registered_Pos01_Processed_Follicle_01.tif	1	119	161	117	153.929	127.271	12.4699	Yes
120	Registered_Pos01_Processed_Follicle_01.tif	1	120	161	117	153.929	127.271	12.4699	Yes
121	Registered_Pos01_Processed_Follicle_01.tif	1	121	164	112	153.929	127.271	18.2931	Yes
122	Registered_Pos01_Processed_Follicle_01.tif	1	122	174	110	153.929	127.271	26.479	Yes
123	Registered_Pos01_Processed_Follicle_01.tif	1	123	173	113	153.929	127.271	23.8195	Yes
124	Registered_Pos01_Processed_Follicle_01.tif	1	124	172	115	153.929	127.271	21.8436	Yes
125	Registered_Pos01_Processed_Follicle_01.tif	1	125	172	115	153.929	127.271	21.8436	Yes
126	Registered_Pos01_Processed_Follicle_01.tif	1	126	170	119	153.929	127.271	18.0745	Yes
127	Registered_Pos01_Processed_Follicle_01.tif	1	127	169	124	153.929	127.271	15.4218	Yes
128	Registered_Pos01_Processed_Follicle_01.tif	1	128	170	127	153.929	127.271	16.0732	Yes
129	Registered_Pos01_Processed_Follicle_01.tif	1	129	171	127	153.929	127.271	17.073	Yes
130	Registered_Pos01_Processed_Follicle_01.tif	1	130	170	125	153.929	127.271	16.2306	Yes
131	Registered_Pos01_Processed_Follicle_01.tif	1	131	169	125	153.929	127.271	15.2411	Yes
132	Registered_Pos01_Processed_Follicle_01.tif	1	132	169	124	153.929	127.271	15.4218	Yes
133	Registered_Pos01_Processed_Follicle_01.tif	1	133	171	123	153.929	127.271	17.5971	Yes
134	Registered_Pos01_Processed_Follicle_01.tif	1	134	165	123	153.929	127.271	11.8663	Yes
135	Registered_Pos01_Processed_Follicle_01.tif	1	135	167	124	153.929	127.271	13.474	Yes
136	Registered_Pos01_Processed_Follicle_01.tif	1	136	164	128	153.929	127.271	10.0972	Yes
137	Registered_Pos01_Processed_Follicle_01.tif	1	137	164	128	153.929	127.271	10.0972	Yes
138	Registered_Pos01_Processed_Follicle_01.tif	1	138	166	129	153.929	127.271	12.194	Yes
139	Registered_Pos01_Processed_Follicle_01.tif	1	139	164	128	153.929	127.271	10.0972	Yes
140	Registered_Pos01_Processed_Follicle_01.tif	1	140	161	122	153.929	127.271	8.8195	Yes
141	Registered_Pos01_Processed_Follicle_01.tif	1	141	161	118	153.929	127.271	11.66	Yes
142	Registered_Pos01_Processed_Follicle_01.tif	1	142	161	120	153.929	127.271	10.1425	Yes
143	Registered_Pos01_Processed_Follicle_01.tif	1	143	163	117	153.929	127.271	13.7033	Yes
144	Registered_Pos01_Processed_Follicle_01.tif	1	144	163	117	153.929	127.271	13.7033	Yes
145	Registered_Pos01_Processed_Follicle_01.tif	1	145	169	116	153.929	127.271	18.8195	Yes
146	Registered_Pos01_Processed_Follicle_01.tif	1	146	171	118	153.929	127.271	19.4261	Yes
147	Registered_Pos01_Processed_Follicle_01.tif	1	147	172	117	153.929	127.271	20.786	Yes
148	Registered_Pos01_Processed_Follicle_01.tif	1	148	175	117	153.929	127.271	23.441	Yes
149	Registered_Pos01_Processed_Follicle_01.tif	1	149	175	117	153.929	127.271	23.441	Yes
150	Registered_Pos01_Processed_Follicle_01.tif	1	150	170	119	153.929	127.271	18.0745	Yes
153	Registered_Pos01_Processed_Follicle_01.tif	2	1	139	95	153.929	127.271	35.5572	Yes
154	Registered_Pos01_Processed_Follicle_01.tif	2	2	140	98	153.929	127.271	32.4165	Yes
155	Registered_Pos01_Processed_Follicle_01.tif	2	3	140	98	153.929	127.271	32.4165	Yes
156	Registered_Pos01_Processed_Follicle_01.tif	2	4	138	96	153.929	127.271	35.0946	Yes
157	Registered_Pos01_Processed_Follicle_01.tif	2	5	139	93	153.929	127.271	37.3819	Yes
158	Registered_Pos01_Processed_Follicle_01.tif	2	6	139	93	153.929	127.271	37.3819	Yes
159	Registered_Pos01_Processed_Follicle_01.tif	2	7	143	97	153.929	127.271	32.1838	Yes
160	Registered_Pos01_Processed_Follicle_01.tif	2	8	153	109	153.929	127.271	18.2949	Yes
161	Registered_Pos01_Processed_Follicle_01.tif	2	9	153	111	153.929	127.271	16.2978	Yes
162	Registered_Pos01_Processed_Follicle_01.tif	2	10	155	111	153.929	127.271	16.3065	Yes
163	Registered_Pos01_Processed_Follicle_01.tif	2	11	163	117	153.929	127.271	13.7033	Yes
164	Registered_Pos01_Processed_Follicle_01.tif	2	12	163	117	153.929	127.271	13.7033	Yes
165	Registered_Pos01_Processed_Follicle_01.tif	2	13	164	117	153.929	127.271	14.3848	Yes
166	Registered_Pos01_Processed_Follicle_01.tif	2	14	164	117	153.929	127.271	14.3848	Yes
167	Registered_Pos01_Processed_Follicle_01.tif	2	15	165	119	153.929	127.271	13.8195	Yes
168	Registered_Pos01_Processed_Follicle_01.tif	2	16	171	122	153.929	127.271	17.8662	Yes
169	Registered_Pos01_Processed_Follicle_01.tif	2	17	174	123	153.929	127.271	20.5203	Yes
170	Registered_Pos01_Processed_Follicle_01.tif	2	18	170	126	153.929	127.271	16.1211	Yes
171	Registered_Pos01_Processed_Follicle_01.tif	2	19	171	124	153.929	127.271	17.3815	Yes
172	Registered_Pos01_Processed_Follicle_01.tif	2	20	172	120	153.929	127.271	19.4789	Yes
173	Registered_Pos01_Processed_Follicle_01.tif	2	21	172	120	153.929	127.271	19.4789	Yes
174	Registered_Pos01_Processed_Follicle_01.tif	2	22	172	120	153.929	127.271	19.4789	Yes
175	Registered_Pos01_Processed_Follicle_01.tif	2	23	172	125	153.929	127.271	18.2131	Yes
176	Registered_Pos01_Processed_Follicle_01.tif	2	24	170	125	153.929	127.271	16.2306	Yes
177	Registered_Pos01_Processed_Follicle_01.tif	2	25	172	127	153.929	127.271	18.0729	Yes
178	Registered_Pos01_Processed_Follicle_01.tif	2	26	176	127	153.929	127.271	22.0725	Yes
179	Registered_Pos01_Processed_Follicle_01.tif	2	27	175	127	153.929	127.271	21.0726	Yes
180	Registered_Pos01_Processed_Follicle_01.tif	2	28	174	126	153.929	127.271	20.1111	Yes
181	Registered_Pos01_Processed_Follicle_01.tif	2	29	173	126	153.929	127.271	19.1132	Yes
182	Registered_Pos01_Processed_Follicle_01.tif	2	30	173	130	153.929	127.271	19.2651	Yes
183	Registered_Pos01_Processed_Follicle_01.tif	2	31	175	132	153.929	127.271	21.595	Yes
184	Registered_Pos01_Processed_Follicle_01.tif	2	32	177	130	153.929	127.271	23.2317	Yes
185	Registered_Pos01_Processed_Follicle_01.tif	2	33	169	130	153.929	127.271	15.3159	Yes
186	Registered_Pos01_Processed_Follicle_01.tif	2	34	168	128	153.929	127.271	14.0897	Yes
187	Registered_Pos01_Processed_Follicle_01.tif	2	35	168	123	153.929	127.271	14.7049	Yes
188	Registered_Pos01_Processed_Follicle_01.tif	2	36	171	124	153.929	127.271	17.3815	Yes
189	Registered_Pos01_Processed_Follicle_01.tif	2	37	172	124	153.929	127.271	18.3646	Yes
190	Registered_Pos01_Processed_Follicle_01.tif	2	38	172	125	153.929	127.271	18.2131	Yes
191	Registered_Pos01_Processed_Follicle_01.tif	2	39	171	125	153.929	127.271	17.2213	Yes
192	Registered_Pos01_Processed_Follicle_01.tif	2	40	174	124	153.929	127.271	20.3357	Yes
193	Registered_Pos01_Processed_Follicle_01.tif	2	41	172	120	153.929	127.271	19.4789	Yes
194	Registered_Pos01_Processed_Follicle_01.tif	2	42	172	123	153.929	127.271	18.5688	Yes
195	Registered_Pos01_Processed_Follicle_01.tif	2	43	169	122	153.929	127.271	15.9662	Yes
196	Registered_Pos01_Processed_Follicle_01.tif	2	44	172	124	153.929	127.271	18.3646	Yes
197	Registered_Pos01_Processed_Follicle_01.tif	2	45	174	124	153.929	127.271	20.3357	Yes
198	Registered_Pos01_Processed_Follicle_01.tif	2	46	174	124	153.929	127.271	20.3357	Yes
199	Registered_Pos01_Processed_Follicle_01.tif	2	47	174	124	153.929	127.271	20.3357	Yes
200	Registered_Pos01_Processed_Follicle_01.tif	2	48	174	124	153.929	127.271	20.3357	Yes
201	Registered_Pos01_Processed_Follicle_01.tif	2	49	174	124	153.929	127.271	20.3357	Yes
202	Registered_Pos01_Processed_Follicle_01.tif	2	50	174	124	153.929	127.271	20.3357	Yes
203	Registered_Pos01_Processed_Follicle_01.tif	2	51	172	129	153.929	127.271	18.1534	Yes
204	Registered_Pos01_Processed_Follicle_01.tif	2	52	173	132	153.929	127.271	19.6484	Yes
205	Registered_Pos01_Processed_Follicle_01.tif	2	53	173	132	153.929	127.271	19.6484	Yes
206	Registered_Pos01_Processed_Follicle_01.tif	2	54	172	132	153.929	127.271	18.6793	Yes
207	Registered_Pos01_Processed_Follicle_01.tif	2	55	173	128	153.929	127.271	19.0848	Yes
208	Registered_Pos01_Processed_Follicle_01.tif	2	56	173	128	153.929	127.271	19.0848	Yes
209	Registered_Pos01_Processed_Follicle_01.tif	2	57	171	123	153.929	127.271	17.5971	Yes
210	Registered_Pos01_Processed_Follicle_01.tif	2	58	173	126	153.929	127.271	19.1132	Yes
211	Registered_Pos01_Processed_Follicle_01.tif	2	59	175	129	153.929	127.271	21.1417	Yes
212	Registered_Pos01_Processed_Follicle_01.tif	2	60	176	130	153.929	127.271	22.2389	Yes
213	Registered_Pos01_Processed_Follicle_01.tif	2	61	175	129	153.929	127.271	21.1417	Yes
214	Registered_Pos01_Processed_Follicle_01.tif	2	62	169	125	153.929	127.271	15.2411	Yes
215	Registered_Pos01_Processed_Follicle_01.tif	2	63	169	125	153.929	127.271	15.2411	Yes
216	Registered_Pos01_Processed_Follicle_01.tif	2	64	169	125	153.929	127.271	15.2411	Yes
217	Registered_Pos01_Processed_Follicle_01.tif	2	65	169	126	153.929	127.271	15.1244	Yes
218	Registered_Pos01_Processed_Follicle_01.tif	2	66	167	126	153.929	127.271	13.1326	Yes
219	Registered_Pos01_Processed_Follicle_01.tif	2	67	165	126	153.929	127.271	11.1436	Yes
220	Registered_Pos01_Processed_Follicle_01.tif	2	68	164	125	153.929	127.271	10.3238	Yes
221	Registered_Pos01_Processed_Follicle_01.tif	2	69	164	125	153.929	127.271	10.3238	Yes
222	Registered_Pos01_Processed_Follicle_01.tif	2	70	163	125	153.929	127.271	9.3509	Yes
223	Registered_Pos01_Processed_Follicle_01.tif	2	71	161	124	153.929	127.271	7.791	Yes
224	Registered_Pos01_Processed_Follicle_01.tif	2	72	161	124	153.929	127.271	7.791	Yes
225	Registered_Pos01_Processed_Follicle_01.tif	2	73	161	124	153.929	127.271	7.791	Yes
226	Registered_Pos01_Processed_Follicle_01.tif	2	74	161	126	153.929	127.271	7.1843	Yes
227	Registered_Pos01_Processed_Follicle_01.tif	2	75	164	127	153.929	127.271	10.0745	Yes
228	Registered_Pos01_Processed_Follicle_01.tif	2	76	164	127	153.929	127.271	10.0745	Yes
229	Registered_Pos01_Processed_Follicle_01.tif	2	77	164	127	153.929	127.271	10.0745	Yes
230	Registered_Pos01_Processed_Follicle_01.tif	2	78	162	127	153.929	127.271	8.0754	Yes
231	Registered_Pos01_Processed_Follicle_01.tif	2	79	164	126	153.929	127.271	10.1508	Yes
232	Registered_Pos01_Processed_Follicle_01.tif	2	80	164	130	153.929	127.271	10.434	Yes
233	Registered_Pos01_Processed_Follicle_01.tif	2	81	165	130	153.929	127.271	11.4022	Yes
234	Registered_Pos01_Processed_Follicle_01.tif	2	82	165	129	153.929	127.271	11.205	Yes
235	Registered_Pos01_Processed_Follicle_01.tif	2	83	169	127	153.929	127.271	15.0733	Yes
236	Registered_Pos01_Processed_Follicle_01.tif	2	84	171	126	153.929	127.271	17.1182	Yes
237	Registered_Pos01_Processed_Follicle_01.tif	2	85	175	127	153.929	127.271	21.0726	Yes
238	Registered_Pos01_Processed_Follicle_01.tif	2	86	176	127	153.929	127.271	22.0725	Yes
239	Registered_Pos01_Processed_Follicle_01.tif	2	87	179	122	153.929	127.271	25.6191	Yes
240	Registered_Pos01_Processed_Follicle_01.tif	2	88	179	117	153.929	127.271	27.0933	Yes
241	Registered_Pos01_Processed_Follicle_01.tif	2	89	179	117	153.929	127.271	27.0933	Yes
242	Registered_Pos01_Processed_Follicle_01.tif	2	90	179	117	153.929	127.271	27.0933	Yes
243	Registered_Pos01_Processed_Follicle_01.tif	2	91	179	117	153.929	127.271	27.0933	Yes
244	Registered_Pos01_Processed_Follicle_01.tif	2	92	177	117	153.929	127.271	25.254	Yes
245	Registered_Pos01_Processed_Follicle_01.tif	2	93	175	117	153.929	127.271	23.441	Yes
246	Registered_Pos01_Processed_Follicle_01.tif	2	94	168	119	153.929	127.271	16.3219	Yes
247	Registered_Pos01_Processed_Follicle_01.tif	2	95	165	121	153.929	127.271	12.7238	Yes
248	Registered_Pos01_Processed_Follicle_01.tif	2	96	165	121	153.929	127.271	12.7238	Yes
249	Registered_Pos01_Processed_Follicle_01.tif	2	97	162	122	153.929	127.271	9.6398	Yes
250	Registered_Pos01_Processed_Follicle_01.tif	2	98	164	125	153.929	127.271	10.3238	Yes
251	Registered_Pos01_Processed_Follicle_01.tif	2	99	165	125	153.929	127.271	11.3015	Yes
252	Registered_Pos01_Processed_Follicle_01.tif	2	100	162	126	153.929	127.271	8.1704	Yes
253	Registered_Pos01_Processed_Follicle_01.tif	2	101	164	123	153.929	127.271	10.9392	Yes
254	Registered_Pos01_Processed_Follicle_01.tif	2	102	165	122	153.929	127.271	12.2618	Yes
255	Registered_Pos01_Processed_Follicle_01.tif	2	103	165	122	153.929	127.271	12.2618	Yes
256	Registered_Pos01_Processed_Follicle_01.tif	2	104	164	123	153.929	127.271	10.9392	Yes
257	Registered_Pos01_Processed_Follicle_01.tif	2	105	163	124	153.929	127.271	9.6427	Yes
258	Registered_Pos01_Processed_Follicle_01.tif	2	106	163	124	153.929	127.271	9.6427	Yes
259	Registered_Pos01_Processed_Follicle_01.tif	2	107	165	124	153.929	127.271	11.5441	Yes
260	Registered_Pos01_Processed_Follicle_01.tif	2	108	164	124	153.929	127.271	10.5889	Yes
261	Registered_Pos01_Processed_Follicle_01.tif	2	109	165	126	153.929	127.271	11.1436	Yes
262	Registered_Pos01_Processed_Follicle_01.tif	2	110	165	126	153.929	127.271	11.1436	Yes
263	Registered_Pos01_Processed_Follicle_01.tif	2	111	164	126	153.929	127.271	10.1508	Yes
264	Registered_Pos01_Processed_Follicle_01.tif	2	112	163	126	153.929	127.271	9.1595	Yes
265	Registered_Pos01_Processed_Follicle_01.tif	2	113	166	124	153.929	127.271	12.5063	Yes
266	Registered_Pos01_Processed_Follicle_01.tif	2	114	167	123	153.929	127.271	13.7511	Yes
267	Registered_Pos01_Processed_Follicle_01.tif	2	115	163	123	153.929	127.271	10.0262	Yes
268	Registered_Pos01_Processed_Follicle_01.tif	2	116	167	122	153.929	127.271	14.0938	Yes
269	Registered_Pos01_Processed_Follicle_01.tif	2	117	167	124	153.929	127.271	13.474	Yes
270	Registered_Pos01_Processed_Follicle_01.tif	2	118	168	125	153.929	127.271	14.253	Yes
271	Registered_Pos01_Processed_Follicle_01.tif	2	119	167	126	153.929	127.271	13.1326	Yes
272	Registered_Pos01_Processed_Follicle_01.tif	2	120	167	126	153.929	127.271	13.1326	Yes
273	Registered_Pos01_Processed_Follicle_01.tif	2	121	167	126	153.929	127.271	13.1326	Yes
274	Registered_Pos01_Processed_Follicle_01.tif	2	122	168	125	153.929	127.271	14.253	Yes
275	Registered_Pos01_Processed_Follicle_01.tif	2	123	168	125	153.929	127.271	14.253	Yes
276	Registered_Pos01_Processed_Follicle_01.tif	2	124	168	125	153.929	127.271	14.253	Yes
277	Registered_Pos01_Processed_Follicle_01.tif	2	125	159	124	153.929	127.271	6.0345	Yes
278	Registered_Pos01_Processed_Follicle_01.tif	2	126	154	119	153.929	127.271	8.2716	Yes
279	Registered_Pos01_Processed_Follicle_01.tif	2	127	152	118	153.929	127.271	9.4699	Yes
280	Registered_Pos01_Processed_Follicle_01.tif	2	128	155	118	153.929	127.271	9.333	Yes
281	Registered_Pos01_Processed_Follicle_01.tif	2	129	155	118	153.929	127.271	9.333	Yes
282	Registered_Pos01_Processed_Follicle_01.tif	2	130	152	121	153.929	127.271	6.5613	Yes
283	Registered_Pos01_Processed_Follicle_01.tif	2	131	150	125	153.929	127.271	4.5384	Yes
284	Registered_Pos01_Processed_Follicle_01.tif	2	132	153	125	153.929	127.271	2.454	Yes
285	Registered_Pos01_Processed_Follicle_01.tif	2	133	157	119	153.929	127.271	8.823	Yes
286	Registered_Pos01_Processed_Follicle_01.tif	2	134	159	114	153.929	127.271	14.2071	Yes
287	Registered_Pos01_Processed_Follicle_01.tif	2	135	161	119	153.929	127.271	10.8817	Yes
288	Registered_Pos01_Processed_Follicle_01.tif	2	136	161	122	153.929	127.271	8.8195	Yes
289	Registered_Pos01_Processed_Follicle_01.tif	2	137	164	127	153.929	127.271	10.0745	Yes
290	Registered_Pos01_Processed_Follicle_01.tif	2	138	166	127	153.929	127.271	12.0739	Yes
291	Registered_Pos01_Processed_Follicle_01.tif	2	139	166	131	153.929	127.271	12.6336	Yes
292	Registered_Pos01_Processed_Follicle_01.tif	2	140	158	121	153.929	127.271	7.4767	Yes
293	Registered_Pos01_Processed_Follicle_01.tif	2	141	161	118	153.929	127.271	11.66	Yes
294	Registered_Pos01_Processed_Follicle_01.tif	2	142	163	117	153.929	127.271	13.7033	Yes
295	Registered_Pos01_Processed_Follicle_01.tif	2	143	163	118	153.929	127.271	12.9707	Yes
296	Registered_Pos01_Processed_Follicle_01.tif	2	144	163	116	153.929	127.271	14.468	Yes
297	Registered_Pos01_Processed_Follicle_01.tif	2	145	165	115	153.929	127.271	16.5273	Yes
298	Registered_Pos01_Processed_Follicle_01.tif	2	146	167	115	153.929	127.271	17.9286	Yes
299	Registered_Pos01_Processed_Follicle_01.tif	2	147	165	113	153.929	127.271	18.062	Yes
300	Registered_Pos01_Processed_Follicle_01.tif	2	148	162	115	153.929	127.271	14.6876	Yes
301	Registered_Pos01_Processed_Follicle_01.tif	2	149	160	116	153.929	127.271	12.8023	Yes
302	Registered_Pos01_Processed_Follicle_01.tif	2	150	154	117	153.929	127.271	10.2716	Yes
304	Registered_Pos01_Processed_Follicle_01.tif	3	1	25	232	153.929	127.271	166.105	No
305	Registered_Pos01_Processed_Follicle_01.tif	3	2	26	232	153.929	127.271	165.33	No
306	Registered_Pos01_Processed_Follicle_01.tif	3	3	26	232	153.929	127.271	165.33	No
307	Registered_Pos01_Processed_Follicle_01.tif	3	4	26	232	153.929	127.271	165.33	No
308	Registered_Pos01_Processed_Follicle_01.tif	3	5	24	232	153.929	127.271	166.882	No
309	Registered_Pos01_Processed_Follicle_01.tif	3	6	24	232	153.929	127.271	166.882	No
310	Registered_Pos01_Processed_Follicle_01.tif	3	7	24	230	153.929	127.271	165.634	No
311	Registered_Pos01_Processed_Follicle_01.tif	3	8	24	233	153.929	127.271	167.512	No
312	Registered_Pos01_Processed_Follicle_01.tif	3	9	24	233	153.929	127.271	167.512	No
313	Registered_Pos01_Processed_Follicle_01.tif	3	10	22	238	153.929	127.271	172.239	No
314	Registered_Pos01_Processed_Follicle_01.tif	3	11	22	233	153.929	127.271	169.068	No
315	Registered_Pos01_Processed_Follicle_01.tif	3	12	23	235	153.929	127.271	169.552	No
316	Registered_Pos01_Processed_Follicle_01.tif	3	13	20	235	153.929	127.271	171.879	No
317	Registered_Pos01_Processed_Follicle_01.tif	3	14	20	235	153.929	127.271	171.879	No
318	Registered_Pos01_Processed_Follicle_01.tif	3	15	23	233	153.929	127.271	168.288	No
319	Registered_Pos01_Processed_Follicle_01.tif	3	16	21	233	153.929	127.271	169.849	No
320	Registered_Pos01_Processed_Follicle_01.tif	3	17	17	234	153.929	127.271	173.611	No
321	Registered_Pos01_Processed_Follicle_01.tif	3	18	14	233	153.929	127.271	175.382	No
322	Registered_Pos01_Processed_Follicle_01.tif	3	19	16	234	153.929	127.271	174.4	No
323	Registered_Pos01_Processed_Follicle_01.tif	3	20	14	236	153.929	127.271	177.206	No
324	Registered_Pos01_Processed_Follicle_01.tif	3	21	14	234	153.929	127.271	175.986	No
325	Registered_Pos01_Processed_Follicle_01.tif	3	22	14	236	153.929	127.271	177.206	No
326	Registered_Pos01_Processed_Follicle_01.tif	3	23	14	233	153.929	127.271	175.382	No
327	Registered_Pos01_Processed_Follicle_01.tif	3	24	14	233	153.929	127.271	175.382	No
328	Registered_Pos01_Processed_Follicle_01.tif	3	25	13	232	153.929	127.271	175.582	No
329	Registered_Pos01_Processed_Follicle_01.tif	3	26	14	233	153.929	127.271	175.382	No
330	Registered_Pos01_Processed_Follicle_01.tif	3	27	14	235	153.929	127.271	176.595	No
331	Registered_Pos01_Processed_Follicle_01.tif	3	28	15	233	153.929	127.271	174.585	No
332	Registered_Pos01_Processed_Follicle_01.tif	4	1	107	218	153.929	127.271	102.147	No
333	Registered_Pos01_Processed_Follicle_01.tif	4	2	111	215	153.929	127.271	97.669	No
334	Registered_Pos01_Processed_Follicle_01.tif	4	3	107	213	153.929	127.271	97.733	No
335	Registered_Pos01_Processed_Follicle_01.tif	4	4	110	212	153.929	127.271	95.4396	No
336	Registered_Pos01_Processed_Follicle_01.tif	4	5	108	213	153.929	127.271	97.2568	No
337	Registered_Pos01_Processed_Follicle_01.tif	4	6	108	209	153.929	127.271	93.75	No
338	Registered_Pos01_Processed_Follicle_01.tif	4	7	108	209	153.929	127.271	93.75	No
339	Registered_Pos01_Processed_Follicle_01.tif	4	8	107	210	153.929	127.271	95.1124	No
340	Registered_Pos01_Processed_Follicle_01.tif	4	9	109	206	153.929	127.271	90.6467	No
341	Registered_Pos01_Processed_Follicle_01.tif	4	10	109	207	153.929	127.271	91.5166	No
342	Registered_Pos01_Processed_Follicle_01.tif	4	11	115	215	153.929	127.271	95.9781	No
343	Registered_Pos01_Processed_Follicle_01.tif	4	12	113	211	153.929	127.271	93.197	No
344	Registered_Pos01_Processed_Follicle_01.tif	4	13	114	211	153.929	127.271	92.7622	No
345	Registered_Pos01_Processed_Follicle_01.tif	4	14	115	214	153.929	127.271	95.0649	No
346	Registered_Pos01_Processed_Follicle_01.tif	4	15	114	212	153.929	127.271	93.6658	No
347	Registered_Pos01_Processed_Follicle_01.tif	4	16	113	212	153.929	127.271	94.0964	No
348	Registered_Pos01_Processed_Follicle_01.tif	4	17	115	210	153.929	127.271	91.4303	No
349	Registered_Pos01_Processed_Follicle_01.tif	4	18	112	206	153.929	127.271	89.1978	No
350	Registered_Pos01_Processed_Follicle_01.tif	4	19	113	205	153.929	127.271	87.8461	No
351	Registered_Pos01_Processed_Follicle_01.tif	4	20	113	205	153.929	127.271	87.8461	No
352	Registered_Pos01_Processed_Follicle_01.tif	4	21	111	203	153.929	127.271	87.0502	No
353	Registered_Pos01_Processed_Follicle_01.tif	4	22	113	202	153.929	127.271	85.2031	No
354	Registered_Pos01_Processed_Follicle_01.tif	4	23	110	203	153.929	127.271	87.5477	No
355	Registered_Pos01_Processed_Follicle_01.tif	4	24	110	200	153.929	127.271	84.966	No
356	Registered_Pos01_Processed_Follicle_01.tif	4	25	110	202	153.929	127.271	86.6841	No
357	Registered_Pos01_Processed_Follicle_01.tif	4	26	111	202	153.929	127.271	86.1817	No
358	Registered_Pos01_Processed_Follicle_01.tif	4	27	111	207	153.929	127.271	90.5515	No
359	Registered_Pos01_Processed_Follicle_01.tif	4	28	114	211	153.929	127.271	92.7622	No
360	Registered_Pos01_Processed_Follicle_01.tif	4	29	112	211	153.929	127.271	93.6405	No
361	Registered_Pos01_Processed_Follicle_01.tif	4	30	116	212	153.929	127.271	92.8308	No
362	Registered_Pos01_Processed_Follicle_01.tif	4	31	111	213	153.929	127.271	95.8765	No
363	Registered_Pos01_Processed_Follicle_01.tif	4	32	111	213	153.929	127.271	95.8765	No
364	Registered_Pos01_Processed_Follicle_01.tif	4	33	111	211	153.929	127.271	94.0925	No
365	Registered_Pos01_Processed_Follicle_01.tif	4	34	111	209	153.929	127.271	92.3173	No
366	Registered_Pos01_Processed_Follicle_01.tif	4	35	109	210	153.929	127.271	94.1417	No
367	Registered_Pos01_Processed_Follicle_01.tif	4	36	109	207	153.929	127.271	91.5166	No
368	Registered_Pos01_Processed_Follicle_01.tif	4	37	107	205	153.929	127.271	90.797	No
369	Registered_Pos01_Processed_Follicle_01.tif	4	38	112	208	153.929	127.271	90.9679	No
370	Registered_Pos01_Processed_Follicle_01.tif	4	39	110	208	153.929	127.271	91.9069	No
371	Registered_Pos01_Processed_Follicle_01.tif	4	40	112	206	153.929	127.271	89.1978	No
372	Registered_Pos01_Processed_Follicle_01.tif	4	41	111	208	153.929	127.271	91.4332	No
373	Registered_Pos01_Processed_Follicle_01.tif	4	42	112	207	153.929	127.271	90.0817	No
374	Registered_Pos01_Processed_Follicle_01.tif	4	43	109	205	153.929	127.271	89.7796	No
375	Registered_Pos01_Processed_Follicle_01.tif	4	44	111	204	153.929	127.271	87.9215	No
376	Registered_Pos01_Processed_Follicle_01.tif	4	45	109	204	153.929	127.271	88.9152	No
377	Registered_Pos01_Processed_Follicle_01.tif	4	46	111	202	153.929	127.271	86.1817	No
378	Registered_Pos01_Processed_Follicle_01.tif	4	47	110	202	153.929	127.271	86.6841	No
379	Registered_Pos01_Processed_Follicle_01.tif	4	48	112	200	153.929	127.271	83.9494	No
380	Registered_Pos01_Processed_Follicle_01.tif	4	49	110	200	153.929	127.271	84.966	No
381	Registered_Pos01_Processed_Follicle_01.tif	4	50	113	201	153.929	127.271	84.3274	No
382	Registered_Pos01_Processed_Follicle_01.tif	4	51	111	201	153.929	127.271	85.316	No
383	Registered_Pos01_Processed_Follicle_01.tif	4	52	111	201	153.929	127.271	85.316	No
384	Registered_Pos01_Processed_Follicle_01.tif	4	53	111	201	153.929	127.271	85.316	No
385	Registered_Pos01_Processed_Follicle_01.tif	4	54	111	201	153.929	127.271	85.316	No
386	Registered_Pos01_Processed_Follicle_01.tif	4	55	111	201	153.929	127.271	85.316	No
387	Registered_Pos01_Processed_Follicle_01.tif	4	56	109	199	153.929	127.271	84.6382	No
388	Registered_Pos01_Processed_Follicle_01.tif	4	57	106	199	153.929	127.271	86.2682	No
389	Registered_Pos01_Processed_Follicle_01.tif	4	58	105	196	153.929	127.271	84.3664	No
390	Registered_Pos01_Processed_Follicle_01.tif	4	59	104	192	153.929	127.271	81.7479	No
391	Registered_Pos01_Processed_Follicle_01.tif	4	60	100	188	153.929	127.271	81.2177	No
392	Registered_Pos01_Processed_Follicle_01.tif	4	61	98	186	153.929	127.271	81.0995	No
393	Registered_Pos01_Processed_Follicle_01.tif	4	62	95	181	153.929	127.271	79.7459	No
394	Registered_Pos01_Processed_Follicle_01.tif	4	63	92	177	153.929	127.271	79.4239	No
395	Registered_Pos01_Processed_Follicle_01.tif	4	64	92	174	153.929	127.271	77.5808	No
396	Registered_Pos01_Processed_Follicle_01.tif	4	65	92	174	153.929	127.271	77.5808	No
397	Registered_Pos01_Processed_Follicle_01.tif	4	66	89	172	153.929	127.271	78.8444	No
398	Registered_Pos01_Processed_Follicle_01.tif	4	67	89	171	153.929	127.271	78.2815	No
399	Registered_Pos01_Processed_Follicle_01.tif	4	68	87	169	153.929	127.271	78.872	No
400	Registered_Pos01_Processed_Follicle_01.tif	4	69	89	171	153.929	127.271	78.2815	No
401	Registered_Pos01_Processed_Follicle_01.tif	4	70	90	172	153.929	127.271	78.023	No
402	Registered_Pos01_Processed_Follicle_01.tif	4	71	89	172	153.929	127.271	78.8444	No
403	Registered_Pos01_Processed_Follicle_01.tif	4	72	88	172	153.929	127.271	79.67	No
404	Registered_Pos01_Processed_Follicle_01.tif	4	73	88	170	153.929	127.271	78.5645	No
405	Registered_Pos01_Processed_Follicle_01.tif	4	74	88	169	153.929	127.271	78.0252	No
406	Registered_Pos01_Processed_Follicle_01.tif	4	75	88	169	153.929	127.271	78.0252	No
407	Registered_Pos01_Processed_Follicle_01.tif	4	76	87	168	153.929	127.271	78.3475	No
408	Registered_Pos01_Processed_Follicle_01.tif	4	77	89	170	153.929	127.271	77.7273	No
409	Registered_Pos01_Processed_Follicle_01.tif	4	78	89	170	153.929	127.271	77.7273	No
410	Registered_Pos01_Processed_Follicle_01.tif	4	79	88	172	153.929	127.271	79.67	No
411	Registered_Pos01_Processed_Follicle_01.tif	4	80	88	172	153.929	127.271	79.67	No
412	Registered_Pos01_Processed_Follicle_01.tif	4	81	88	171	153.929	127.271	79.1129	No
413	Registered_Pos01_Processed_Follicle_01.tif	4	82	89	169	153.929	127.271	77.1821	No
414	Registered_Pos01_Processed_Follicle_01.tif	4	83	87	167	153.929	127.271	77.8323	No
415	Registered_Pos01_Processed_Follicle_01.tif	4	84	87	167	153.929	127.271	77.8323	No
416	Registered_Pos01_Processed_Follicle_01.tif	4	85	87	167	153.929	127.271	77.8323	No
417	Registered_Pos01_Processed_Follicle_01.tif	4	86	87	167	153.929	127.271	77.8323	No
418	Registered_Pos01_Processed_Follicle_01.tif	4	87	85	165	153.929	127.271	78.5791	No
419	Registered_Pos01_Processed_Follicle_01.tif	4	88	85	165	153.929	127.271	78.5791	No
420	Registered_Pos01_Processed_Follicle_01.tif	4	89	86	165	153.929	127.271	77.7034	No
421	Registered_Pos01_Processed_Follicle_01.tif	4	90	85	165	153.929	127.271	78.5791	No
422	Registered_Pos01_Processed_Follicle_01.tif	4	91	85	164	153.929	127.271	78.1039	No
423	Registered_Pos01_Processed_Follicle_01.tif	4	92	84	165	153.929	127.271	79.4577	No
424	Registered_Pos01_Processed_Follicle_01.tif	4	93	86	165	153.929	127.271	77.7034	No
425	Registered_Pos01_Processed_Follicle_01.tif	4	94	85	164	153.929	127.271	78.1039	No
426	Registered_Pos01_Processed_Follicle_01.tif	4	95	85	164	153.929	127.271	78.1039	No
427	Registered_Pos01_Processed_Follicle_01.tif	4	96	85	164	153.929	127.271	78.1039	No
428	Registered_Pos01_Processed_Follicle_01.tif	4	97	85	163	153.929	127.271	77.6387	No
429	Registered_Pos01_Processed_Follicle_01.tif	4	98	86	164	153.929	127.271	77.2228	No
430	Registered_Pos01_Processed_Follicle_01.tif	4	99	86	164	153.929	127.271	77.2228	No
431	Registered_Pos01_Processed_Follicle_01.tif	4	100	86	164	153.929	127.271	77.2228	No
432	Registered_Pos01_Processed_Follicle_01.tif	4	101	86	164	153.929	127.271	77.2228	No
433	Registered_Pos01_Processed_Follicle_01.tif	4	102	86	165	153.929	127.271	77.7034	No
434	Registered_Pos01_Processed_Follicle_01.tif	4	103	86	166	153.929	127.271	78.1938	No
435	Registered_Pos01_Processed_Follicle_01.tif	4	104	86	166	153.929	127.271	78.1938	No
436	Registered_Pos01_Processed_Follicle_01.tif	4	105	86	166	153.929	127.271	78.1938	No
437	Registered_Pos01_Processed_Follicle_01.tif	4	106	86	166	153.929	127.271	78.1938	No
438	Registered_Pos01_Processed_Follicle_01.tif	4	107	86	166	153.929	127.271	78.1938	No
439	Registered_Pos01_Processed_Follicle_01.tif	4	108	88	166	153.929	127.271	76.4628	No
440	Registered_Pos01_Processed_Follicle_01.tif	4	109	86	168	153.929	127.271	79.2035	No
441	Registered_Pos01_Processed_Follicle_01.tif	4	110	85	167	153.929	127.271	79.5587	No
442	Registered_Pos01_Processed_Follicle_01.tif	4	111	86	167	153.929	127.271	78.6939	No
443	Registered_Pos01_Processed_Follicle_01.tif	4	112	86	171	153.929	127.271	80.7871	No
444	Registered_Pos01_Processed_Follicle_01.tif	4	113	86	171	153.929	127.271	80.7871	No
445	Registered_Pos01_Processed_Follicle_01.tif	4	114	87	171	153.929	127.271	79.9481	No
446	Registered_Pos01_Processed_Follicle_01.tif	4	115	87	171	153.929	127.271	79.9481	No
447	Registered_Pos01_Processed_Follicle_01.tif	4	116	87	171	153.929	127.271	79.9481	No
448	Registered_Pos01_Processed_Follicle_01.tif	4	117	89	173	153.929	127.271	79.416	No
449	Registered_Pos01_Processed_Follicle_01.tif	4	118	89	170	153.929	127.271	77.7273	No
450	Registered_Pos01_Processed_Follicle_01.tif	4	119	92	175	153.929	127.271	78.1872	No
451	Registered_Pos01_Processed_Follicle_01.tif	4	120	92	179	153.929	127.271	80.6912	No
452	Registered_Pos01_Processed_Follicle_01.tif	4	121	94	182	153.929	127.271	81.1586	No
453	Registered_Pos01_Processed_Follicle_01.tif	4	122	94	182	153.929	127.271	81.1586	No
454	Registered_Pos01_Processed_Follicle_01.tif	4	123	101	186	153.929	127.271	79.0604	No
455	Registered_Pos01_Processed_Follicle_01.tif	4	124	106	188	153.929	127.271	77.3639	No
456	Registered_Pos01_Processed_Follicle_01.tif	4	125	108	190	153.929	127.271	77.7455	No
457	Registered_Pos01_Processed_Follicle_01.tif	4	126	107	190	153.929	127.271	78.3405	No
458	Registered_Pos01_Processed_Follicle_01.tif	4	127	108	188	153.929	127.271	76.141	No
459	Registered_Pos01_Processed_Follicle_01.tif	4	128	108	188	153.929	127.271	76.141	No
460	Registered_Pos01_Processed_Follicle_01.tif	4	129	109	188	153.929	127.271	75.542	No
461	Registered_Pos01_Processed_Follicle_01.tif	4	130	109	186	153.929	127.271	73.9438	No
462	Registered_Pos01_Processed_Follicle_01.tif	4	131	107	186	153.929	127.271	75.1758	No
463	Registered_Pos01_Processed_Follicle_01.tif	4	132	107	188	153.929	127.271	76.7484	No
464	Registered_Pos01_Processed_Follicle_01.tif	4	133	107	188	153.929	127.271	76.7484	No
465	Registered_Pos01_Processed_Follicle_01.tif	4	134	109	186	153.929	127.271	73.9438	No
466	Registered_Pos01_Processed_Follicle_01.tif	4	135	108	186	153.929	127.271	74.5556	No
467	Registered_Pos01_Processed_Follicle_01.tif	4	136	107	186	153.929	127.271	75.1758	No
468	Registered_Pos01_Processed_Follicle_01.tif	4	137	110	187	153.929	127.271	74.1436	No
469	Registered_Pos01_Processed_Follicle_01.tif	4	138	107	189	153.929	127.271	77.5421	No
470	Registered_Pos01_Processed_Follicle_01.tif	4	139	108	185	153.929	127.271	73.7705	No
471	Registered_Pos01_Processed_Follicle_01.tif	4	140	109	184	153.929	127.271	72.3655	No
472	Registered_Pos01_Processed_Follicle_01.tif	4	141	109	189	153.929	127.271	76.3482	No
473	Registered_Pos01_Processed_Follicle_01.tif	4	142	108	190	153.929	127.271	77.7455	No
474	Registered_Pos01_Processed_Follicle_01.tif	4	143	109	186	153.929	127.271	73.9438	No
475	Registered_Pos01_Processed_Follicle_01.tif	4	144	109	187	153.929	127.271	74.7405	No
476	Registered_Pos01_Processed_Follicle_01.tif	4	145	109	184	153.929	127.271	72.3655	No
477	Registered_Pos01_Processed_Follicle_01.tif	4	146	111	183	153.929	127.271	70.3462	No
478	Registered_Pos01_Processed_Follicle_01.tif	4	147	108	186	153.929	127.271	74.5556	No
479	Registered_Pos01_Processed_Follicle_01.tif	4	148	118	190	153.929	127.271	72.2896	No
480	Registered_Pos01_Processed_Follicle_01.tif	4	149	120	193	153.929	127.271	73.9692	No
481	Registered_Pos01_Processed_Follicle_01.tif	4	150	120	193	153.929	127.271	73.9692	No
482	Registered_Pos01_Processed_Follicle_01.tif	5	1	225	17	153.929	127.271	131.19	No
483	Registered_Pos01_Processed_Follicle_01.tif	5	2	226	16	153.929	127.271	132.573	No
484	Registered_Pos01_Processed_Follicle_01.tif	5	3	225	15	153.929	127.271	132.876	No
485	Registered_Pos01_Processed_Follicle_01.tif	5	4	225	14	153.929	127.271	133.722	No
486	Registered_Pos01_Processed_Follicle_01.tif	5	5	226	15	153.929	127.271	133.413	No
487	Registered_Pos01_Processed_Follicle_01.tif	5	6	226	15	153.929	127.271	133.413	No
488	Registered_Pos01_Processed_Follicle_01.tif	5	7	223	14	153.929	127.271	132.669	No
489	Registered_Pos01_Processed_Follicle_01.tif	5	8	229	17	153.929	127.271	133.399	No
490	Registered_Pos01_Processed_Follicle_01.tif	5	9	227	17	153.929	127.271	132.284	No
491	Registered_Pos01_Processed_Follicle_01.tif	6	1	0	18	153.929	127.271	188.771	No
492	Registered_Pos01_Processed_Follicle_01.tif	6	2	3	20	153.929	127.271	185.167	No
493	Registered_Pos01_Processed_Follicle_01.tif	6	3	3	16	153.929	127.271	187.512	No
494	Registered_Pos01_Processed_Follicle_01.tif	6	4	7	19	153.929	127.271	182.513	No
495	Registered_Pos01_Processed_Follicle_01.tif	6	5	7	17	153.929	127.271	183.706	No
496	Registered_Pos01_Processed_Follicle_01.tif	7	1	55	39	153.929	127.271	132.585	No
497	Registered_Pos01_Processed_Follicle_01.tif	7	2	54	41	153.929	127.271	132.017	No
498	Registered_Pos01_Processed_Follicle_01.tif	7	3	55	40	153.929	127.271	131.921	No
499	Registered_Pos01_Processed_Follicle_01.tif	7	4	56	35	153.929	127.271	134.552	No
500	Registered_Pos01_Processed_Follicle_01.tif	7	5	56	36	153.929	127.271	133.868	No
501	Registered_Pos01_Processed_Follicle_01.tif	7	6	56	39	153.929	127.271	131.841	No
502	Registered_Pos01_Processed_Follicle_01.tif	7	7	55	37	153.929	127.271	133.925	No
503	Registered_Pos01_Processed_Follicle_01.tif	7	8	55	41	153.929	127.271	131.262	No
504	Registered_Pos01_Processed_Follicle_01.tif	7	9	53	39	153.929	127.271	134.084	No
505	Registered_Pos01_Processed_Follicle_01.tif	7	10	57	37	153.929	127.271	132.454	No
506	Registered_Pos01_Processed_Follicle_01.tif	7	11	58	39	153.929	127.271	130.362	No
507	Registered_Pos01_Processed_Follicle_01.tif	7	12	59	35	153.929	127.271	132.384	No
508	Registered_Pos01_Processed_Follicle_01.tif	7	13	61	34	153.929	127.271	131.664	No
509	Registered_Pos01_Processed_Follicle_01.tif	7	14	59	34	153.929	127.271	133.083	No
510	Registered_Pos01_Processed_Follicle_01.tif	7	15	58	33	153.929	127.271	134.497	No
511	Registered_Pos01_Processed_Follicle_01.tif	7	16	57	34	153.929	127.271	134.517	No
512	Registered_Pos01_Processed_Follicle_01.tif	7	17	58	33	153.929	127.271	134.497	No
513	Registered_Pos01_Processed_Follicle_01.tif	7	18	58	37	153.929	127.271	131.724	No
514	Registered_Pos01_Processed_Follicle_01.tif	7	19	58	35	153.929	127.271	133.103	No
515	Registered_Pos01_Processed_Follicle_01.tif	7	20	61	35	153.929	127.271	130.957	No
516	Registered_Pos01_Processed_Follicle_01.tif	7	21	59	35	153.929	127.271	132.384	No
517	Registered_Pos01_Processed_Follicle_01.tif	7	22	59	35	153.929	127.271	132.384	No
518	Registered_Pos01_Processed_Follicle_01.tif	7	23	59	34	153.929	127.271	133.083	No
519	Registered_Pos01_Processed_Follicle_01.tif	7	24	60	37	153.929	127.271	130.275	No
520	Registered_Pos01_Processed_Follicle_01.tif	7	25	60	33	153.929	127.271	133.078	No
521	Registered_Pos01_Processed_Follicle_01.tif	7	26	58	32	153.929	127.271	135.2	No
522	Registered_Pos01_Processed_Follicle_01.tif	7	27	58	29	153.929	127.271	137.33	No
523	Registered_Pos01_Processed_Follicle_01.tif	7	28	59	30	153.929	127.271	135.916	No
524	Registered_Pos01_Processed_Follicle_01.tif	7	29	58	32	153.929	127.271	135.2	No
525	Registered_Pos01_Processed_Follicle_01.tif	7	30	58	32	153.929	127.271	135.2	No
526	Registered_Pos01_Processed_Follicle_01.tif	7	31	57	31	153.929	127.271	136.614	No
527	Registered_Pos01_Processed_Follicle_01.tif	7	32	56	33	153.929	127.271	135.931	No
528	Registered_Pos01_Processed_Follicle_01.tif	7	33	55	34	153.929	127.271	135.965	No
529	Registered_Pos01_Processed_Follicle_01.tif	7	34	56	34	153.929	127.271	135.239	No
530	Registered_Pos01_Processed_Follicle_01.tif	7	35	57	35	153.929	127.271	133.826	No
531	Registered_Pos01_Processed_Follicle_01.tif	7	36	55	32	153.929	127.271	137.345	No
532	Registered_Pos01_Processed_Follicle_01.tif	7	37	55	32	153.929	127.271	137.345	No
533	Registered_Pos01_Processed_Follicle_01.tif	7	38	55	35	153.929	127.271	135.281	No
534	Registered_Pos01_Processed_Follicle_01.tif	7	39	56	33	153.929	127.271	135.931	No
535	Registered_Pos01_Processed_Follicle_01.tif	7	40	54	33	153.929	127.271	137.379	No
536	Registered_Pos01_Processed_Follicle_01.tif	7	41	55	33	153.929	127.271	136.653	No
537	Registered_Pos01_Processed_Follicle_01.tif	7	42	56	31	153.929	127.271	137.326	No
538	Registered_Pos01_Processed_Follicle_01.tif	7	43	53	32	153.929	127.271	138.792	No
539	Registered_Pos01_Processed_Follicle_01.tif	7	44	53	34	153.929	127.271	137.427	No
540	Registered_Pos01_Processed_Follicle_01.tif	7	45	53	32	153.929	127.271	138.792	No
541	Registered_Pos01_Processed_Follicle_01.tif	7	46	52	33	153.929	127.271	138.84	No
542	Registered_Pos01_Processed_Follicle_01.tif	7	47	53	34	153.929	127.271	137.427	No
543	Registered_Pos01_Processed_Follicle_01.tif	7	48	53	34	153.929	127.271	137.427	No
544	Registered_Pos01_Processed_Follicle_01.tif	7	49	53	32	153.929	127.271	138.792	No
545	Registered_Pos01_Processed_Follicle_01.tif	7	50	54	31	153.929	127.271	138.759	No
546	Registered_Pos01_Processed_Follicle_01.tif	7	51	53	33	153.929	127.271	138.108	No
547	Registered_Pos01_Processed_Follicle_01.tif	7	52	53	31	153.929	127.271	139.481	No
548	Registered_Pos01_Processed_Follicle_01.tif	7	53	54	32	153.929	127.271	138.067	No
549	Registered_Pos01_Processed_Follicle_01.tif	7	54	54	30	153.929	127.271	139.454	No
550	Registered_Pos01_Processed_Follicle_01.tif	7	55	54	31	153.929	127.271	138.759	No
551	Registered_Pos01_Processed_Follicle_01.tif	7	56	53	32	153.929	127.271	138.792	No
552	Registered_Pos01_Processed_Follicle_01.tif	7	57	53	33	153.929	127.271	138.108	No
553	Registered_Pos01_Processed_Follicle_01.tif	7	58	52	31	153.929	127.271	140.206	No
554	Registered_Pos01_Processed_Follicle_01.tif	7	59	54	32	153.929	127.271	138.067	No
555	Registered_Pos01_Processed_Follicle_01.tif	7	60	52	32	153.929	127.271	139.521	No
556	Registered_Pos01_Processed_Follicle_01.tif	7	61	52	34	153.929	127.271	138.163	No
557	Registered_Pos01_Processed_Follicle_01.tif	7	62	51	34	153.929	127.271	138.903	No
558	Registered_Pos01_Processed_Follicle_01.tif	7	63	51	33	153.929	127.271	139.576	No
559	Registered_Pos01_Processed_Follicle_01.tif	7	64	51	28	153.929	127.271	143.001	No
560	Registered_Pos01_Processed_Follicle_01.tif	7	65	52	34	153.929	127.271	138.163	No
561	Registered_Pos01_Processed_Follicle_01.tif	7	66	53	34	153.929	127.271	137.427	No
562	Registered_Pos01_Processed_Follicle_01.tif	7	67	54	33	153.929	127.271	137.379	No
563	Registered_Pos01_Processed_Follicle_01.tif	7	68	53	34	153.929	127.271	137.427	No
564	Registered_Pos01_Processed_Follicle_01.tif	7	69	54	33	153.929	127.271	137.379	No
565	Registered_Pos01_Processed_Follicle_01.tif	7	70	56	35	153.929	127.271	134.552	No
566	Registered_Pos01_Processed_Follicle_01.tif	7	71	53	35	153.929	127.271	136.75	No
567	Registered_Pos01_Processed_Follicle_01.tif	7	72	54	36	153.929	127.271	135.338	No
568	Registered_Pos01_Processed_Follicle_01.tif	7	73	55	35	153.929	127.271	135.281	No
569	Registered_Pos01_Processed_Follicle_01.tif	7	74	55	37	153.929	127.271	133.925	No
570	Registered_Pos01_Processed_Follicle_01.tif	7	75	57	37	153.929	127.271	132.454	No
571	Registered_Pos01_Processed_Follicle_01.tif	7	76	55	38	153.929	127.271	133.253	No
572	Registered_Pos01_Processed_Follicle_01.tif	7	77	57	39	153.929	127.271	131.1	No
573	Registered_Pos01_Processed_Follicle_01.tif	7	78	58	38	153.929	127.271	131.041	No
574	Registered_Pos01_Processed_Follicle_01.tif	7	79	56	37	153.929	127.271	133.188	No
575	Registered_Pos01_Processed_Follicle_01.tif	7	80	54	38	153.929	127.271	133.997	No
576	Registered_Pos01_Processed_Follicle_01.tif	7	81	57	37	153.929	127.271	132.454	No
577	Registered_Pos01_Processed_Follicle_01.tif	7	82	57	39	153.929	127.271	131.1	No
578	Registered_Pos01_Processed_Follicle_01.tif	7	83	58	37	153.929	127.271	131.724	No
579	Registered_Pos01_Processed_Follicle_01.tif	7	84	57	39	153.929	127.271	131.1	No
580	Registered_Pos01_Processed_Follicle_01.tif	7	85	56	37	153.929	127.271	133.188	No
581	Registered_Pos01_Processed_Follicle_01.tif	7	86	58	38	153.929	127.271	131.041	No
582	Registered_Pos01_Processed_Follicle_01.tif	7	87	56	36	153.929	127.271	133.868	No
583	Registered_Pos01_Processed_Follicle_01.tif	7	88	57	38	153.929	127.271	131.775	No
584	Registered_Pos01_Processed_Follicle_01.tif	7	89	57	39	153.929	127.271	131.1	No
585	Registered_Pos01_Processed_Follicle_01.tif	7	90	59	39	153.929	127.271	129.628	No
586	Registered_Pos01_Processed_Follicle_01.tif	7	91	60	40	153.929	127.271	128.214	No
587	Registered_Pos01_Processed_Follicle_01.tif	7	92	61	41	153.929	127.271	126.801	No
588	Registered_Pos01_Processed_Follicle_01.tif	7	93	60	40	153.929	127.271	128.214	No
589	Registered_Pos01_Processed_Follicle_01.tif	7	94	61	38	153.929	127.271	128.861	No
590	Registered_Pos01_Processed_Follicle_01.tif	7	95	57	41	153.929	127.271	129.761	No
591	Registered_Pos01_Processed_Follicle_01.tif	7	96	52	39	153.929	127.271	134.838	No
592	Registered_Pos01_Processed_Follicle_01.tif	7	97	48	39	153.929	127.271	137.887	No
593	Registered_Pos01_Processed_Follicle_01.tif	7	98	53	40	153.929	127.271	133.428	No
594	Registered_Pos01_Processed_Follicle_01.tif	7	99	55	43	153.929	127.271	129.956	No
595	Registered_Pos01_Processed_Follicle_01.tif	7	100	59	41	153.929	127.271	128.274	No
596	Registered_Pos01_Processed_Follicle_01.tif	7	101	58	43	153.929	127.271	127.687	No
597	Registered_Pos01_Processed_Follicle_01.tif	7	102	61	43	153.929	127.271	125.449	No
598	Registered_Pos01_Processed_Follicle_01.tif	7	103	62	43	153.929	127.271	124.71	No
599	Registered_Pos01_Processed_Follicle_01.tif	7	104	60	42	153.929	127.271	126.862	No
600	Registered_Pos01_Processed_Follicle_01.tif	7	105	61	41	153.929	127.271	126.801	No
601	Registered_Pos01_Processed_Follicle_01.tif	7	106	62	43	153.929	127.271	124.71	No
602	Registered_Pos01_Processed_Follicle_01.tif	7	107	60	41	153.929	127.271	127.536	No
603	Registered_Pos01_Processed_Follicle_01.tif	7	108	63	41	153.929	127.271	125.343	No
604	Registered_Pos01_Processed_Follicle_01.tif	7	109	60	42	153.929	127.271	126.862	No
605	Registered_Pos01_Processed_Follicle_01.tif	7	110	62	43	153.929	127.271	124.71	No
606	Registered_Pos01_Processed_Follicle_01.tif	7	111	62	44	153.929	127.271	124.037	No
607	Registered_Pos01_Processed_Follicle_01.tif	7	112	61	43	153.929	127.271	125.449	No
608	Registered_Pos01_Processed_Follicle_01.tif	7	113	61	42	153.929	127.271	126.123	No
609	Registered_Pos01_Processed_Follicle_01.tif	7	114	63	44	153.929	127.271	123.297	No
610	Registered_Pos01_Processed_Follicle_01.tif	7	115	63	44	153.929	127.271	123.297	No
611	Registered_Pos01_Processed_Follicle_01.tif	7	116	62	44	153.929	127.271	124.037	No
612	Registered_Pos01_Processed_Follicle_01.tif	7	117	62	44	153.929	127.271	124.037	No
613	Registered_Pos01_Processed_Follicle_01.tif	7	118	62	44	153.929	127.271	124.037	No
614	Registered_Pos01_Processed_Follicle_01.tif	7	119	63	45	153.929	127.271	122.624	No
615	Registered_Pos01_Processed_Follicle_01.tif	7	120	64	43	153.929	127.271	123.243	No
616	Registered_Pos01_Processed_Follicle_01.tif	7	121	64	46	153.929	127.271	121.212	No
617	Registered_Pos01_Processed_Follicle_01.tif	7	122	64	46	153.929	127.271	121.212	No
618	Registered_Pos01_Processed_Follicle_01.tif	7	123	64	46	153.929	127.271	121.212	No
619	Registered_Pos01_Processed_Follicle_01.tif	7	124	64	44	153.929	127.271	122.562	No
620	Registered_Pos01_Processed_Follicle_01.tif	7	125	64	47	153.929	127.271	120.543	No
621	Registered_Pos01_Processed_Follicle_01.tif	7	126	62	43	153.929	127.271	124.71	No
622	Registered_Pos01_Processed_Follicle_01.tif	7	127	61	44	153.929	127.271	124.78	No
623	Registered_Pos01_Processed_Follicle_01.tif	7	128	63	46	153.929	127.271	121.956	No
624	Registered_Pos01_Processed_Follicle_01.tif	7	129	61	46	153.929	127.271	123.454	No
625	Registered_Pos01_Processed_Follicle_01.tif	7	130	62	45	153.929	127.271	123.368	No
626	Registered_Pos01_Processed_Follicle_01.tif	7	131	61	43	153.929	127.271	125.449	No
627	Registered_Pos01_Processed_Follicle_01.tif	7	132	64	45	153.929	127.271	121.885	No
628	Registered_Pos01_Processed_Follicle_01.tif	7	133	63	46	153.929	127.271	121.956	No
629	Registered_Pos01_Processed_Follicle_01.tif	7	134	62	44	153.929	127.271	124.037	No
630	Registered_Pos01_Processed_Follicle_01.tif	7	135	63	45	153.929	127.271	122.624	No
631	Registered_Pos01_Processed_Follicle_01.tif	7	136	61	45	153.929	127.271	124.114	No
632	Registered_Pos01_Processed_Follicle_01.tif	7	137	61	49	153.929	127.271	121.5	No
633	Registered_Pos01_Processed_Follicle_01.tif	7	138	60	49	153.929	127.271	122.266	No
634	Registered_Pos01_Processed_Follicle_01.tif	7	139	61	49	153.929	127.271	121.5	No
635	Registered_Pos01_Processed_Follicle_01.tif	7	140	60	49	153.929	127.271	122.266	No
636	Registered_Pos01_Processed_Follicle_01.tif	7	141	59	49	153.929	127.271	123.036	No
637	Registered_Pos01_Processed_Follicle_01.tif	7	142	59	49	153.929	127.271	123.036	No
638	Registered_Pos01_Processed_Follicle_01.tif	7	143	59	49	153.929	127.271	123.036	No
639	Registered_Pos01_Processed_Follicle_01.tif	7	144	59	49	153.929	127.271	123.036	No
640	Registered_Pos01_Processed_Follicle_01.tif	7	145	59	49	153.929	127.271	123.036	No
641	Registered_Pos01_Processed_Follicle_01.tif	7	146	58	51	153.929	127.271	122.555	No
642	Registered_Pos01_Processed_Follicle_01.tif	7	147	64	63	153.929	127.271	110.535	No
643	Registered_Pos01_Processed_Follicle_01.tif	7	148	63	63	153.929	127.271	111.35	No
644	Registered_Pos01_Processed_Follicle_01.tif	7	149	63	63	153.929	127.271	111.35	No
645	Registered_Pos01_Processed_Follicle_01.tif	7	150	64	65	153.929	127.271	109.385	No
646	Registered_Pos01_Processed_Follicle_01.tif	8	1	223	92	153.929	127.271	77.5555	No
647	Registered_Pos01_Processed_Follicle_01.tif	8	2	222	91	153.929	127.271	77.1314	No
648	Registered_Pos01_Processed_Follicle_01.tif	8	3	223	90	153.929	127.271	78.4853	No
649	Registered_Pos01_Processed_Follicle_01.tif	8	4	223	89	153.929	127.271	78.9651	No
650	Registered_Pos01_Processed_Follicle_01.tif	8	5	222	89	153.929	127.271	78.0919	No
651	Registered_Pos01_Processed_Follicle_01.tif	8	6	223	91	153.929	127.271	78.0154	No
652	Registered_Pos01_Processed_Follicle_01.tif	8	7	225	90	153.929	127.271	80.251	No
653	Registered_Pos01_Processed_Follicle_01.tif	8	8	224	89	153.929	127.271	79.8412	No
654	Registered_Pos01_Processed_Follicle_01.tif	8	9	226	89	153.929	127.271	81.6021	No
655	Registered_Pos01_Processed_Follicle_01.tif	8	10	227	90	153.929	127.271	82.0275	No
656	Registered_Pos01_Processed_Follicle_01.tif	8	11	226	90	153.929	127.271	81.1379	No
657	Registered_Pos01_Processed_Follicle_01.tif	8	12	226	89	153.929	127.271	81.6021	No
658	Registered_Pos01_Processed_Follicle_01.tif	8	13	226	91	153.929	127.271	80.6835	No
659	Registered_Pos01_Processed_Follicle_01.tif	8	14	226	89	153.929	127.271	81.6021	No
660	Registered_Pos01_Processed_Follicle_01.tif	8	15	227	89	153.929	127.271	82.4867	No
661	Registered_Pos01_Processed_Follicle_01.tif	8	16	227	90	153.929	127.271	82.0275	No
662	Registered_Pos01_Processed_Follicle_01.tif	8	17	230	89	153.929	127.271	85.1556	No
663	Registered_Pos01_Processed_Follicle_01.tif	8	18	227	89	153.929	127.271	82.4867	No
664	Registered_Pos01_Processed_Follicle_01.tif	8	19	229	90	153.929	127.271	83.814	No
665	Registered_Pos01_Processed_Follicle_01.tif	8	20	229	90	153.929	127.271	83.814	No
666	Registered_Pos01_Processed_Follicle_01.tif	8	21	228	90	153.929	127.271	82.9195	No
667	Registered_Pos01_Processed_Follicle_01.tif	8	22	229	89	153.929	127.271	84.2635	No
668	Registered_Pos01_Processed_Follicle_01.tif	8	23	229	89	153.929	127.271	84.2635	No
669	Registered_Pos01_Processed_Follicle_01.tif	8	24	229	89	153.929	127.271	84.2635	No
670	Registered_Pos01_Processed_Follicle_01.tif	8	25	229	89	153.929	127.271	84.2635	No
671	Registered_Pos01_Processed_Follicle_01.tif	8	26	229	90	153.929	127.271	83.814	No
672	Registered_Pos01_Processed_Follicle_01.tif	8	27	230	90	153.929	127.271	84.7109	No
673	Registered_Pos01_Processed_Follicle_01.tif	8	28	229	90	153.929	127.271	83.814	No
674	Registered_Pos01_Processed_Follicle_01.tif	8	29	229	90	153.929	127.271	83.814	No
675	Registered_Pos01_Processed_Follicle_01.tif	8	30	226	90	153.929	127.271	81.1379	No
676	Registered_Pos01_Processed_Follicle_01.tif	8	31	229	86	153.929	127.271	85.6677	No
677	Registered_Pos01_Processed_Follicle_01.tif	8	32	231	89	153.929	127.271	86.0501	No
678	Registered_Pos01_Processed_Follicle_01.tif	8	33	232	87	153.929	127.271	87.8456	No
679	Registered_Pos01_Processed_Follicle_01.tif	8	34	232	86	153.929	127.271	88.3085	No
680	Registered_Pos01_Processed_Follicle_01.tif	8	35	232	86	153.929	127.271	88.3085	No
681	Registered_Pos01_Processed_Follicle_01.tif	8	36	230	88	153.929	127.271	85.6097	No
682	Registered_Pos01_Processed_Follicle_01.tif	8	37	232	90	153.929	127.271	86.5114	No
683	Registered_Pos01_Processed_Follicle_01.tif	8	38	230	89	153.929	127.271	85.1556	No
684	Registered_Pos01_Processed_Follicle_01.tif	8	39	233	90	153.929	127.271	87.4149	No
685	Registered_Pos01_Processed_Follicle_01.tif	8	40	234	88	153.929	127.271	89.1829	No
686	Registered_Pos01_Processed_Follicle_01.tif	8	41	233	88	153.929	127.271	88.2861	No
687	Registered_Pos01_Processed_Follicle_01.tif	8	42	233	89	153.929	127.271	87.8459	No
688	Registered_Pos01_Processed_Follicle_01.tif	8	43	234	89	153.929	127.271	88.7471	No
689	Registered_Pos01_Processed_Follicle_01.tif	8	44	233	90	153.929	127.271	87.4149	No
690	Registered_Pos01_Processed_Follicle_01.tif	8	45	232	91	153.929	127.271	86.0853	No
691	Registered_Pos01_Processed_Follicle_01.tif	8	46	232	91	153.929	127.271	86.0853	No
692	Registered_Pos01_Processed_Follicle_01.tif	8	47	232	90	153.929	127.271	86.5114	No
693	Registered_Pos01_Processed_Follicle_01.tif	8	48	233	88	153.929	127.271	88.2861	No
694	Registered_Pos01_Processed_Follicle_01.tif	8	49	231	89	153.929	127.271	86.0501	No
695	Registered_Pos01_Processed_Follicle_01.tif	8	50	232	90	153.929	127.271	86.5114	No
696	Registered_Pos01_Processed_Follicle_01.tif	8	51	232	92	153.929	127.271	85.6687	No
697	Registered_Pos01_Processed_Follicle_01.tif	8	52	232	92	153.929	127.271	85.6687	No
698	Registered_Pos01_Processed_Follicle_01.tif	8	53	232	92	153.929	127.271	85.6687	No
699	Registered_Pos01_Processed_Follicle_01.tif	8	54	232	92	153.929	127.271	85.6687	No
700	Registered_Pos01_Processed_Follicle_01.tif	8	55	232	92	153.929	127.271	85.6687	No
701	Registered_Pos01_Processed_Follicle_01.tif	8	56	232	92	153.929	127.271	85.6687	No
702	Registered_Pos01_Processed_Follicle_01.tif	8	57	232	92	153.929	127.271	85.6687	No
703	Registered_Pos01_Processed_Follicle_01.tif	8	58	232	92	153.929	127.271	85.6687	No
704	Registered_Pos01_Processed_Follicle_01.tif	8	59	232	92	153.929	127.271	85.6687	No
705	Registered_Pos01_Processed_Follicle_01.tif	8	60	231	92	153.929	127.271	84.7584	No
706	Registered_Pos01_Processed_Follicle_01.tif	8	61	229	91	153.929	127.271	83.3741	No
707	Registered_Pos01_Processed_Follicle_01.tif	8	62	230	91	153.929	127.271	84.2757	No
708	Registered_Pos01_Processed_Follicle_01.tif	8	63	232	92	153.929	127.271	85.6687	No
709	Registered_Pos01_Processed_Follicle_01.tif	8	64	234	99	153.929	127.271	84.9153	No
710	Registered_Pos01_Processed_Follicle_01.tif	8	65	233	100	153.929	127.271	83.6417	No
711	Registered_Pos01_Processed_Follicle_01.tif	8	66	231	101	153.929	127.271	81.4254	No
712	Registered_Pos01_Processed_Follicle_01.tif	8	67	231	102	153.929	127.271	81.1083	No
713	Registered_Pos01_Processed_Follicle_01.tif	8	68	233	100	153.929	127.271	83.6417	No
714	Registered_Pos01_Processed_Follicle_01.tif	8	69	233	103	153.929	127.271	82.7122	No
715	Registered_Pos01_Processed_Follicle_01.tif	8	70	232	101	153.929	127.271	82.3726	No
716	Registered_Pos01_Processed_Follicle_01.tif	8	71	233	102	153.929	127.271	83.0111	No
717	Registered_Pos01_Processed_Follicle_01.tif	8	72	231	103	153.929	127.271	80.8023	No
718	Registered_Pos01_Processed_Follicle_01.tif	8	73	237	104	153.929	127.271	86.2689	No
719	Registered_Pos01_Processed_Follicle_01.tif	8	74	238	104	153.929	127.271	87.2323	No
720	Registered_Pos01_Processed_Follicle_01.tif	8	75	239	104	153.929	127.271	88.1964	No
721	Registered_Pos01_Processed_Follicle_01.tif	8	76	239	107	153.929	127.271	87.4527	No
722	Registered_Pos01_Processed_Follicle_01.tif	8	77	240	105	153.929	127.271	88.9056	No
723	Registered_Pos01_Processed_Follicle_01.tif	8	78	240	105	153.929	127.271	88.9056	No
724	Registered_Pos01_Processed_Follicle_01.tif	8	79	239	107	153.929	127.271	87.4527	No
725	Registered_Pos01_Processed_Follicle_01.tif	8	80	239	106	153.929	127.271	87.6899	No
726	Registered_Pos01_Processed_Follicle_01.tif	8	81	239	105	153.929	127.271	87.9379	No
727	Registered_Pos01_Processed_Follicle_01.tif	8	82	240	106	153.929	127.271	88.6604	No
728	Registered_Pos01_Processed_Follicle_01.tif	8	83	240	106	153.929	127.271	88.6604	No
729	Registered_Pos01_Processed_Follicle_01.tif	8	84	241	105	153.929	127.271	89.8741	No
730	Registered_Pos01_Processed_Follicle_01.tif	8	85	240	106	153.929	127.271	88.6604	No
731	Registered_Pos01_Processed_Follicle_01.tif	8	86	241	106	153.929	127.271	89.6315	No
732	Registered_Pos01_Processed_Follicle_01.tif	8	87	241	106	153.929	127.271	89.6315	No
733	Registered_Pos01_Processed_Follicle_01.tif	8	88	241	106	153.929	127.271	89.6315	No
734	Registered_Pos01_Processed_Follicle_01.tif	8	89	242	106	153.929	127.271	90.6033	No
735	Registered_Pos01_Processed_Follicle_01.tif	8	90	242	106	153.929	127.271	90.6033	No
736	Registered_Pos01_Processed_Follicle_01.tif	8	91	242	106	153.929	127.271	90.6033	No
737	Registered_Pos01_Processed_Follicle_01.tif	8	92	243	107	153.929	127.271	91.3485	No
738	Registered_Pos01_Processed_Follicle_01.tif	8	93	244	107	153.929	127.271	92.3238	No
739	Registered_Pos01_Processed_Follicle_01.tif	8	94	244	108	153.929	127.271	92.1094	No
740	Registered_Pos01_Processed_Follicle_01.tif	8	95	243	107	153.929	127.271	91.3485	No
741	Registered_Pos01_Processed_Follicle_01.tif	8	96	243	107	153.929	127.271	91.3485	No
742	Registered_Pos01_Processed_Follicle_01.tif	8	97	242	107	153.929	127.271	90.3737	No
743	Registered_Pos01_Processed_Follicle_01.tif	8	98	243	107	153.929	127.271	91.3485	No
744	Registered_Pos01_Processed_Follicle_01.tif	8	99	243	109	153.929	127.271	90.9256	No
745	Registered_Pos01_Processed_Follicle_01.tif	8	100	243	109	153.929	127.271	90.9256	No
746	Registered_Pos01_Processed_Follicle_01.tif	8	101	243	109	153.929	127.271	90.9256	No
747	Registered_Pos01_Processed_Follicle_01.tif	8	102	244	107	153.929	127.271	92.3238	No
748	Registered_Pos01_Processed_Follicle_01.tif	8	103	245	108	153.929	127.271	93.0875	No
749	Registered_Pos01_Processed_Follicle_01.tif	8	104	244	107	153.929	127.271	92.3238	No
750	Registered_Pos01_Processed_Follicle_01.tif	8	105	244	107	153.929	127.271	92.3238	No
751	Registered_Pos01_Processed_Follicle_01.tif	8	106	244	109	153.929	127.271	91.9054	No
752	Registered_Pos01_Processed_Follicle_01.tif	8	107	244	107	153.929	127.271	92.3238	No
753	Registered_Pos01_Processed_Follicle_01.tif	8	108	244	108	153.929	127.271	92.1094	No
754	Registered_Pos01_Processed_Follicle_01.tif	8	109	247	109	153.929	127.271	94.8474	No
755	Registered_Pos01_Processed_Follicle_01.tif	8	110	244	111	153.929	127.271	91.5288	No
756	Registered_Pos01_Processed_Follicle_01.tif	8	111	242	113	153.929	127.271	89.2197	No
757	Registered_Pos01_Processed_Follicle_01.tif	8	112	247	112	153.929	127.271	94.3154	No
758	Registered_Pos01_Processed_Follicle_01.tif	8	113	248	111	153.929	127.271	95.4677	No
759	Registered_Pos01_Processed_Follicle_01.tif	8	114	247	111	153.929	127.271	94.4825	No
760	Registered_Pos01_Processed_Follicle_01.tif	8	115	247	111	153.929	127.271	94.4825	No
761	Registered_Pos01_Processed_Follicle_01.tif	8	116	251	111	153.929	127.271	98.4252	No
762	Registered_Pos01_Processed_Follicle_01.tif	8	117	250	111	153.929	127.271	97.4391	No
763	Registered_Pos01_Processed_Follicle_01.tif	8	118	248	111	153.929	127.271	95.4677	No
764	Registered_Pos01_Processed_Follicle_01.tif	8	119	248	109	153.929	127.271	95.8289	No
765	Registered_Pos01_Processed_Follicle_01.tif	8	120	251	111	153.929	127.271	98.4252	No
766	Registered_Pos01_Processed_Follicle_01.tif	8	121	249	109	153.929	127.271	96.8107	No
767	Registered_Pos01_Processed_Follicle_01.tif	8	122	248	113	153.929	127.271	95.1473	No
768	Registered_Pos01_Processed_Follicle_01.tif	8	123	250	112	153.929	127.271	97.2771	No
769	Registered_Pos01_Processed_Follicle_01.tif	8	124	248	110	153.929	127.271	95.6432	No
770	Registered_Pos01_Processed_Follicle_01.tif	8	125	248	111	153.929	127.271	95.4677	No
771	Registered_Pos01_Processed_Follicle_01.tif	8	126	249	109	153.929	127.271	96.8107	No
772	Registered_Pos01_Processed_Follicle_01.tif	8	127	247	111	153.929	127.271	94.4825	No
773	Registered_Pos01_Processed_Follicle_01.tif	8	128	250	109	153.929	127.271	97.7929	No
774	Registered_Pos01_Processed_Follicle_01.tif	8	129	250	112	153.929	127.271	97.2771	No
775	Registered_Pos01_Processed_Follicle_01.tif	8	130	251	111	153.929	127.271	98.4252	No
776	Registered_Pos01_Processed_Follicle_01.tif	8	131	250	110	153.929	127.271	97.611	No
777	Registered_Pos01_Processed_Follicle_01.tif	8	132	250	108	153.929	127.271	97.9847	No
778	Registered_Pos01_Processed_Follicle_01.tif	8	133	250	109	153.929	127.271	97.7929	No
779	Registered_Pos01_Processed_Follicle_01.tif	8	134	249	109	153.929	127.271	96.8107	No
780	Registered_Pos01_Processed_Follicle_01.tif	8	135	248	109	153.929	127.271	95.8289	No
781	Registered_Pos01_Processed_Follicle_01.tif	8	136	248	109	153.929	127.271	95.8289	No
782	Registered_Pos01_Processed_Follicle_01.tif	8	137	248	109	153.929	127.271	95.8289	No
783	Registered_Pos01_Processed_Follicle_01.tif	8	138	248	109	153.929	127.271	95.8289	No
784	Registered_Pos01_Processed_Follicle_01.tif	8	139	248	109	153.929	127.271	95.8289	No
785	Registered_Pos01_Processed_Follicle_01.tif	8	140	248	109	153.929	127.271	95.8289	No
786	Registered_Pos01_Processed_Follicle_01.tif	8	141	248	107	153.929	127.271	96.2302	No
787	Registered_Pos01_Processed_Follicle_01.tif	8	142	247	107	153.929	127.271	95.2529	No
788	Registered_Pos01_Processed_Follicle_01.tif	8	143	247	107	153.929	127.271	95.2529	No
789	Registered_Pos01_Processed_Follicle_01.tif	8	144	248	107	153.929	127.271	96.2302	No
790	Registered_Pos01_Processed_Follicle_01.tif	8	145	248	107	153.929	127.271	96.2302	No
791	Registered_Pos01_Processed_Follicle_01.tif	8	146	247	108	153.929	127.271	95.0451	No
792	Registered_Pos01_Processed_Follicle_01.tif	8	147	246	108	153.929	127.271	94.0661	No
793	Registered_Pos01_Processed_Follicle_01.tif	8	148	247	108	153.929	127.271	95.0451	No
794	Registered_Pos01_Processed_Follicle_01.tif	8	149	247	110	153.929	127.271	94.6599	No
795	Registered_Pos01_Processed_Follicle_01.tif	8	150	247	108	153.929	127.271	95.0451	No
796	Registered_Pos01_Processed_Follicle_01.tif	9	1	255	101	153.929	127.271	104.429	No
797	Registered_Pos01_Processed_Follicle_01.tif	9	2	256	101	153.929	127.271	105.398	No
798	Registered_Pos01_Processed_Follicle_01.tif	9	3	258	102	153.929	127.271	107.095	No
799	Registered_Pos01_Processed_Follicle_01.tif	9	4	258	99	153.929	127.271	107.843	No
800	Registered_Pos01_Processed_Follicle_01.tif	9	5	256	100	153.929	127.271	105.651	No
801	Registered_Pos01_Processed_Follicle_01.tif	9	6	254	100	153.929	127.271	103.72	No
802	Registered_Pos01_Processed_Follicle_01.tif	9	7	254	102	153.929	127.271	103.213	No
803	Registered_Pos01_Processed_Follicle_01.tif	9	8	251	99	153.929	127.271	101.104	No
804	Registered_Pos01_Processed_Follicle_01.tif	9	9	249	98	153.929	127.271	99.475	No
805	Registered_Pos01_Processed_Follicle_01.tif	9	10	250	98	153.929	127.271	100.431	No
806	Registered_Pos01_Processed_Follicle_01.tif	9	11	248	98	153.929	127.271	98.5198	No
807	Registered_Pos01_Processed_Follicle_01.tif	9	12	246	95	153.929	127.271	97.5627	No
808	Registered_Pos01_Processed_Follicle_01.tif	9	13	248	94	153.929	127.271	99.7813	No
809	Registered_Pos01_Processed_Follicle_01.tif	9	14	247	92	153.929	127.271	99.5302	No
810	Registered_Pos01_Processed_Follicle_01.tif	9	15	246	92	153.929	127.271	98.5957	No
811	Registered_Pos01_Processed_Follicle_01.tif	9	16	248	93	153.929	127.271	100.119	No
812	Registered_Pos01_Processed_Follicle_01.tif	9	17	250	93	153.929	127.271	102.001	No
813	Registered_Pos01_Processed_Follicle_01.tif	9	18	246	96	153.929	127.271	97.2365	No
814	Registered_Pos01_Processed_Follicle_01.tif	9	19	247	95	153.929	127.271	98.507	No
815	Registered_Pos01_Processed_Follicle_01.tif	9	20	248	94	153.929	127.271	99.7813	No
816	Registered_Pos01_Processed_Follicle_01.tif	9	21	250	94	153.929	127.271	101.669	No
817	Registered_Pos01_Processed_Follicle_01.tif	9	22	250	92	153.929	127.271	102.341	No
818	Registered_Pos01_Processed_Follicle_01.tif	9	23	251	96	153.929	127.271	101.984	No
819	Registered_Pos01_Processed_Follicle_01.tif	9	24	250	94	153.929	127.271	101.669	No
820	Registered_Pos01_Processed_Follicle_01.tif	9	25	251	94	153.929	127.271	102.615	No
821	Registered_Pos01_Processed_Follicle_01.tif	9	26	254	94	153.929	127.271	105.457	No
822	Registered_Pos01_Processed_Follicle_01.tif	9	27	254	95	153.929	127.271	105.146	No
823	Registered_Pos01_Processed_Follicle_01.tif	9	28	251	92	153.929	127.271	103.28	No
824	Registered_Pos01_Processed_Follicle_01.tif	9	29	253	93	153.929	127.271	104.831	No
825	Registered_Pos01_Processed_Follicle_01.tif	9	30	252	90	153.929	127.271	104.915	No
826	Registered_Pos01_Processed_Follicle_01.tif	9	31	253	93	153.929	127.271	104.831	No
827	Registered_Pos01_Processed_Follicle_01.tif	9	32	253	91	153.929	127.271	105.502	No
828	Registered_Pos01_Processed_Follicle_01.tif	9	33	252	89	153.929	127.271	105.274	No
829	Registered_Pos01_Processed_Follicle_01.tif	9	34	252	87	153.929	127.271	106.017	No
830	Registered_Pos01_Processed_Follicle_01.tif	9	35	254	86	153.929	127.271	108.247	No
831	Registered_Pos01_Processed_Follicle_01.tif	9	36	253	86	153.929	127.271	107.324	No
832	Registered_Pos01_Processed_Follicle_01.tif	9	37	253	86	153.929	127.271	107.324	No
833	Registered_Pos01_Processed_Follicle_01.tif	9	38	254	86	153.929	127.271	108.247	No
834	Registered_Pos01_Processed_Follicle_01.tif	9	39	255	87	153.929	127.271	108.799	No
835	Registered_Pos01_Processed_Follicle_01.tif	9	40	255	88	153.929	127.271	108.432	No
836	Registered_Pos01_Processed_Follicle_01.tif	9	41	253	87	153.929	127.271	106.943	No
837	Registered_Pos01_Processed_Follicle_01.tif	9	42	254	87	153.929	127.271	107.87	No
838	Registered_Pos01_Processed_Follicle_01.tif	9	43	254	87	153.929	127.271	107.87	No
839	Registered_Pos01_Processed_Follicle_01.tif	9	44	255	87	153.929	127.271	108.799	No
840	Registered_Pos01_Processed_Follicle_01.tif	9	45	255	86	153.929	127.271	109.173	No
841	Registered_Pos01_Processed_Follicle_01.tif	9	46	256	85	153.929	127.271	110.478	No
842	Registered_Pos01_Processed_Follicle_01.tif	9	47	254	85	153.929	127.271	108.633	No
843	Registered_Pos01_Processed_Follicle_01.tif	9	48	254	85	153.929	127.271	108.633	No
844	Registered_Pos01_Processed_Follicle_01.tif	9	49	253	85	153.929	127.271	107.712	No
845	Registered_Pos01_Processed_Follicle_01.tif	9	50	254	85	153.929	127.271	108.633	No
846	Registered_Pos01_Processed_Follicle_01.tif	9	51	254	85	153.929	127.271	108.633	No
847	Registered_Pos01_Processed_Follicle_01.tif	9	52	254	85	153.929	127.271	108.633	No
848	Registered_Pos01_Processed_Follicle_01.tif	9	53	254	83	153.929	127.271	109.426	No
849	Registered_Pos01_Processed_Follicle_01.tif	9	54	254	83	153.929	127.271	109.426	No
850	Registered_Pos01_Processed_Follicle_01.tif	9	55	254	83	153.929	127.271	109.426	No
851	Registered_Pos01_Processed_Follicle_01.tif	9	56	254	83	153.929	127.271	109.426	No
852	Registered_Pos01_Processed_Follicle_01.tif	9	57	254	83	153.929	127.271	109.426	No
853	Registered_Pos01_Processed_Follicle_01.tif	9	58	254	82	153.929	127.271	109.835	No
854	Registered_Pos01_Processed_Follicle_01.tif	9	59	253	83	153.929	127.271	108.513	No
855	Registered_Pos01_Processed_Follicle_01.tif	9	60	253	83	153.929	127.271	108.513	No
856	Registered_Pos01_Processed_Follicle_01.tif	9	61	253	83	153.929	127.271	108.513	No
857	Registered_Pos01_Processed_Follicle_01.tif	9	62	253	83	153.929	127.271	108.513	No
858	Registered_Pos01_Processed_Follicle_01.tif	9	63	253	83	153.929	127.271	108.513	No
859	Registered_Pos01_Processed_Follicle_01.tif	9	64	253	82	153.929	127.271	108.924	No
860	Registered_Pos01_Processed_Follicle_01.tif	9	65	253	81	153.929	127.271	109.344	No
861	Registered_Pos01_Processed_Follicle_01.tif	9	66	253	81	153.929	127.271	109.344	No
862	Registered_Pos01_Processed_Follicle_01.tif	9	67	253	81	153.929	127.271	109.344	No
863	Registered_Pos01_Processed_Follicle_01.tif	9	68	253	82	153.929	127.271	108.924	No
864	Registered_Pos01_Processed_Follicle_01.tif	9	69	253	82	153.929	127.271	108.924	No
865	Registered_Pos01_Processed_Follicle_01.tif	9	70	254	82	153.929	127.271	109.835	No
866	Registered_Pos01_Processed_Follicle_01.tif	9	71	252	82	153.929	127.271	108.016	No
867	Registered_Pos01_Processed_Follicle_01.tif	9	72	252	82	153.929	127.271	108.016	No
868	Registered_Pos01_Processed_Follicle_01.tif	9	73	252	82	153.929	127.271	108.016	No
869	Registered_Pos01_Processed_Follicle_01.tif	9	74	253	82	153.929	127.271	108.924	No
870	Registered_Pos01_Processed_Follicle_01.tif	9	75	254	82	153.929	127.271	109.835	No
871	Registered_Pos01_Processed_Follicle_01.tif	9	76	257	87	153.929	127.271	110.659	No
872	Registered_Pos01_Processed_Follicle_01.tif	9	77	255	85	153.929	127.271	109.555	No
873	Registered_Pos01_Processed_Follicle_01.tif	9	78	255	85	153.929	127.271	109.555	No
874	Registered_Pos01_Processed_Follicle_01.tif	9	79	254	85	153.929	127.271	108.633	No
875	Registered_Pos01_Processed_Follicle_01.tif	9	80	254	83	153.929	127.271	109.426	No
876	Registered_Pos01_Processed_Follicle_01.tif	9	81	255	84	153.929	127.271	109.944	No
877	Registered_Pos01_Processed_Follicle_01.tif	9	82	255	84	153.929	127.271	109.944	No
878	Registered_Pos01_Processed_Follicle_01.tif	9	83	257	86	153.929	127.271	111.027	No
879	Registered_Pos01_Processed_Follicle_01.tif	9	84	256	86	153.929	127.271	110.099	No
880	Registered_Pos01_Processed_Follicle_01.tif	9	85	259	89	153.929	127.271	111.824	No
881	Registered_Pos01_Processed_Follicle_01.tif	9	86	258	89	153.929	127.271	110.885	No
882	Registered_Pos01_Processed_Follicle_01.tif	9	87	258	89	153.929	127.271	110.885	No
883	Registered_Pos01_Processed_Follicle_01.tif	9	88	258	89	153.929	127.271	110.885	No
884	Registered_Pos01_Processed_Follicle_01.tif	9	89	259	89	153.929	127.271	111.824	No
885	Registered_Pos01_Processed_Follicle_01.tif	9	90	261	90	153.929	127.271	113.373	No
886	Registered_Pos01_Processed_Follicle_01.tif	9	91	261	90	153.929	127.271	113.373	No
887	Registered_Pos01_Processed_Follicle_01.tif	9	92	260	90	153.929	127.271	112.429	No
888	Registered_Pos01_Processed_Follicle_01.tif	9	93	260	90	153.929	127.271	112.429	No
889	Registered_Pos01_Processed_Follicle_01.tif	9	94	262	90	153.929	127.271	114.317	No
890	Registered_Pos01_Processed_Follicle_01.tif	9	95	261	91	153.929	127.271	113.048	No
891	Registered_Pos01_Processed_Follicle_01.tif	9	96	261	92	153.929	127.271	112.731	No
892	Registered_Pos01_Processed_Follicle_01.tif	9	97	261	92	153.929	127.271	112.731	No
893	Registered_Pos01_Processed_Follicle_01.tif	9	98	261	91	153.929	127.271	113.048	No
894	Registered_Pos01_Processed_Follicle_01.tif	9	99	261	92	153.929	127.271	112.731	No
895	Registered_Pos01_Processed_Follicle_01.tif	9	100	262	93	153.929	127.271	113.375	No
896	Registered_Pos01_Processed_Follicle_01.tif	9	101	262	93	153.929	127.271	113.375	No
897	Registered_Pos01_Processed_Follicle_01.tif	9	102	261	93	153.929	127.271	112.422	No
898	Registered_Pos01_Processed_Follicle_01.tif	9	103	261	93	153.929	127.271	112.422	No
899	Registered_Pos01_Processed_Follicle_01.tif	9	104	262	95	153.929	127.271	112.786	No
900	Registered_Pos01_Processed_Follicle_01.tif	9	105	261	96	153.929	127.271	111.544	No
901	Registered_Pos01_Processed_Follicle_01.tif	9	106	261	99	153.929	127.271	110.74	No
902	Registered_Pos01_Processed_Follicle_01.tif	9	107	262	101	153.929	127.271	111.218	No
903	Registered_Pos01_Processed_Follicle_01.tif	9	108	261	108	153.929	127.271	108.791	No
904	Registered_Pos01_Processed_Follicle_01.tif	9	109	260	112	153.929	127.271	107.165	No
905	Registered_Pos01_Processed_Follicle_01.tif	9	110	259	116	153.929	127.271	105.674	No
906	Registered_Pos01_Processed_Follicle_01.tif	9	111	259	116	153.929	127.271	105.674	No
907	Registered_Pos01_Processed_Follicle_01.tif	9	112	257	118	153.929	127.271	103.487	No
908	Registered_Pos01_Processed_Follicle_01.tif	9	113	258	119	153.929	127.271	104.399	No
909	Registered_Pos01_Processed_Follicle_01.tif	9	114	258	125	153.929	127.271	104.096	No
910	Registered_Pos01_Processed_Follicle_01.tif	9	115	254	125	153.929	127.271	100.097	No
911	Registered_Pos01_Processed_Follicle_01.tif	9	116	254	126	153.929	127.271	100.079	No
912	Registered_Pos01_Processed_Follicle_01.tif	9	117	256	128	153.929	127.271	102.073	No
913	Registered_Pos01_Processed_Follicle_01.tif	9	118	256	132	153.929	127.271	102.18	No
914	Registered_Pos01_Processed_Follicle_01.tif	9	119	255	132	153.929	127.271	101.181	No
915	Registered_Pos01_Processed_Follicle_01.tif	9	120	255	132	153.929	127.271	101.181	No
916	Registered_Pos01_Processed_Follicle_01.tif	9	121	253	133	153.929	127.271	99.2364	No
917	Registered_Pos01_Processed_Follicle_01.tif	9	122	253	133	153.929	127.271	99.2364	No
918	Registered_Pos01_Processed_Follicle_01.tif	9	123	254	131	153.929	127.271	100.14	No
919	Registered_Pos01_Processed_Follicle_01.tif	9	124	252	130	153.929	127.271	98.1088	No
920	Registered_Pos01_Processed_Follicle_01.tif	9	125	252	130	153.929	127.271	98.1088	No
921	Registered_Pos01_Processed_Follicle_01.tif	9	126	254	126	153.929	127.271	100.079	No
922	Registered_Pos01_Processed_Follicle_01.tif	9	127	254	126	153.929	127.271	100.079	No
923	Registered_Pos01_Processed_Follicle_01.tif	9	128	254	127	153.929	127.271	100.071	No
924	Registered_Pos01_Processed_Follicle_01.tif	9	129	256	126	153.929	127.271	102.079	No
925	Registered_Pos01_Processed_Follicle_01.tif	9	130	252	125	153.929	127.271	98.0972	No
926	Registered_Pos01_Processed_Follicle_01.tif	9	131	257	119	153.929	127.271	103.402	No
927	Registered_Pos01_Processed_Follicle_01.tif	9	132	256	120	153.929	127.271	102.329	No
928	Registered_Pos01_Processed_Follicle_01.tif	9	133	255	118	153.929	127.271	101.495	No
929	Registered_Pos01_Processed_Follicle_01.tif	9	134	254	118	153.929	127.271	100.499	No
930	Registered_Pos01_Processed_Follicle_01.tif	9	135	253	116	153.929	127.271	99.71	No
931	Registered_Pos01_Processed_Follicle_01.tif	9	136	253	117	153.929	127.271	99.6019	No
932	Registered_Pos01_Processed_Follicle_01.tif	9	137	253	116	153.929	127.271	99.71	No
933	Registered_Pos01_Processed_Follicle_01.tif	9	138	254	115	153.929	127.271	100.82	No
934	Registered_Pos01_Processed_Follicle_01.tif	9	139	252	113	153.929	127.271	99.1038	No
935	Registered_Pos01_Processed_Follicle_01.tif	9	140	252	111	153.929	127.271	99.4115	No
936	Registered_Pos01_Processed_Follicle_01.tif	9	141	250	109	153.929	127.271	97.7929	No
937	Registered_Pos01_Processed_Follicle_01.tif	9	142	249	108	153.929	127.271	97.0044	No
938	Registered_Pos01_Processed_Follicle_01.tif	9	143	249	107	153.929	127.271	97.208	No
939	Registered_Pos01_Processed_Follicle_01.tif	9	144	249	107	153.929	127.271	97.208	No
940	Registered_Pos01_Processed_Follicle_01.tif	9	145	249	108	153.929	127.271	97.0044	No
941	Registered_Pos01_Processed_Follicle_01.tif	9	146	248	108	153.929	127.271	96.0246	No
942	Registered_Pos01_Processed_Follicle_01.tif	9	147	247	108	153.929	127.271	95.0451	No
943	Registered_Pos01_Processed_Follicle_01.tif	9	148	247	108	153.929	127.271	95.0451	No
944	Registered_Pos01_Processed_Follicle_01.tif	9	149	248	109	153.929	127.271	95.8289	No
945	Registered_Pos01_Processed_Follicle_01.tif	9	150	248	109	153.929	127.271	95.8289	No
946	Registered_Pos01_Processed_Follicle_01.tif	10	1	54	225	153.929	127.271	139.774	No
947	Registered_Pos01_Processed_Follicle_01.tif	10	2	53	224	153.929	127.271	139.797	No
948	Registered_Pos01_Processed_Follicle_01.tif	10	3	53	224	153.929	127.271	139.797	No
949	Registered_Pos01_Processed_Follicle_01.tif	10	4	55	224	153.929	127.271	138.36	No
950	Registered_Pos01_Processed_Follicle_01.tif	10	5	55	224	153.929	127.271	138.36	No
951	Registered_Pos01_Processed_Follicle_01.tif	10	6	55	224	153.929	127.271	138.36	No
952	Registered_Pos01_Processed_Follicle_01.tif	10	7	54	223	153.929	127.271	138.383	No
953	Registered_Pos01_Processed_Follicle_01.tif	10	8	54	223	153.929	127.271	138.383	No
954	Registered_Pos01_Processed_Follicle_01.tif	10	9	53	222	153.929	127.271	138.42	No
955	Registered_Pos01_Processed_Follicle_01.tif	10	10	52	221	153.929	127.271	138.472	No
956	Registered_Pos01_Processed_Follicle_01.tif	10	11	50	223	153.929	127.271	141.298	No
957	Registered_Pos01_Processed_Follicle_01.tif	10	12	51	226	153.929	127.271	142.625	No
958	Registered_Pos01_Processed_Follicle_01.tif	10	13	51	225	153.929	127.271	141.934	No
959	Registered_Pos01_Processed_Follicle_01.tif	10	14	51	226	153.929	127.271	142.625	No
960	Registered_Pos01_Processed_Follicle_01.tif	10	15	51	226	153.929	127.271	142.625	No
961	Registered_Pos01_Processed_Follicle_01.tif	10	16	53	226	153.929	127.271	141.188	No
962	Registered_Pos01_Processed_Follicle_01.tif	10	17	53	226	153.929	127.271	141.188	No
963	Registered_Pos01_Processed_Follicle_01.tif	10	18	53	226	153.929	127.271	141.188	No
964	Registered_Pos01_Processed_Follicle_01.tif	10	19	53	226	153.929	127.271	141.188	No
965	Registered_Pos01_Processed_Follicle_01.tif	10	20	52	227	153.929	127.271	142.602	No
966	Registered_Pos01_Processed_Follicle_01.tif	10	21	51	225	153.929	127.271	141.934	No
967	Registered_Pos01_Processed_Follicle_01.tif	10	22	51	228	153.929	127.271	144.016	No
968	Registered_Pos01_Processed_Follicle_01.tif	10	23	51	228	153.929	127.271	144.016	No
969	Registered_Pos01_Processed_Follicle_01.tif	10	24	52	229	153.929	127.271	144.008	No
970	Registered_Pos01_Processed_Follicle_01.tif	10	25	52	229	153.929	127.271	144.008	No
971	Registered_Pos01_Processed_Follicle_01.tif	10	26	53	229	153.929	127.271	143.302	No
972	Registered_Pos01_Processed_Follicle_01.tif	10	27	57	229	153.929	127.271	140.513	No
973	Registered_Pos01_Processed_Follicle_01.tif	10	28	53	228	153.929	127.271	142.594	No
974	Registered_Pos01_Processed_Follicle_01.tif	10	29	48	223	153.929	127.271	142.776	No
975	Registered_Pos01_Processed_Follicle_01.tif	10	30	50	228	153.929	127.271	144.733	No
976	Registered_Pos01_Processed_Follicle_01.tif	10	31	53	229	153.929	127.271	143.302	No
977	Registered_Pos01_Processed_Follicle_01.tif	10	32	55	229	153.929	127.271	141.9	No
978	Registered_Pos01_Processed_Follicle_01.tif	10	33	54	230	153.929	127.271	143.314	No
979	Registered_Pos01_Processed_Follicle_01.tif	10	34	47	232	153.929	127.271	149.673	No
980	Registered_Pos01_Processed_Follicle_01.tif	10	35	46	230	153.929	127.271	149.003	No
981	Registered_Pos01_Processed_Follicle_01.tif	10	36	44	226	153.929	127.271	147.756	No
982	Registered_Pos01_Processed_Follicle_01.tif	10	37	49	232	153.929	127.271	148.25	No
983	Registered_Pos01_Processed_Follicle_01.tif	10	38	50	232	153.929	127.271	147.544	No
984	Registered_Pos01_Processed_Follicle_01.tif	10	39	51	234	153.929	127.271	148.275	No
985	Registered_Pos01_Processed_Follicle_01.tif	10	40	50	233	153.929	127.271	148.256	No
986	Registered_Pos01_Processed_Follicle_01.tif	10	41	49	235	153.929	127.271	150.385	No
987	Registered_Pos01_Processed_Follicle_01.tif	10	42	50	234	153.929	127.271	148.971	No
988	Registered_Pos01_Processed_Follicle_01.tif	10	43	50	235	153.929	127.271	149.689	No
989	Registered_Pos01_Processed_Follicle_01.tif	10	44	50	233	153.929	127.271	148.256	No
990	Registered_Pos01_Processed_Follicle_01.tif	10	45	51	234	153.929	127.271	148.275	No
991	Registered_Pos01_Processed_Follicle_01.tif	10	46	46	236	153.929	127.271	153.201	No
992	Registered_Pos01_Processed_Follicle_01.tif	10	47	46	235	153.929	127.271	152.493	No
993	Registered_Pos01_Processed_Follicle_01.tif	10	48	46	234	153.929	127.271	151.788	No
994	Registered_Pos01_Processed_Follicle_01.tif	10	49	46	231	153.929	127.271	149.694	No
995	Registered_Pos01_Processed_Follicle_01.tif	10	50	46	231	153.929	127.271	149.694	No
996	Registered_Pos01_Processed_Follicle_01.tif	10	51	44	231	153.929	127.271	151.143	No
997	Registered_Pos01_Processed_Follicle_01.tif	10	52	46	233	153.929	127.271	151.087	No
998	Registered_Pos01_Processed_Follicle_01.tif	10	53	46	233	153.929	127.271	151.087	No
999	Registered_Pos01_Processed_Follicle_01.tif	10	54	44	234	153.929	127.271	153.217	No
1000	Registered_Pos01_Processed_Follicle_01.tif	10	55	43	236	153.929	127.271	155.329	No
1001	Registered_Pos01_Processed_Follicle_01.tif	10	56	43	235	153.929	127.271	154.631	No
1002	Registered_Pos01_Processed_Follicle_01.tif	10	57	44	237	153.929	127.271	155.322	No
1003	Registered_Pos01_Processed_Follicle_01.tif	10	58	43	237	153.929	127.271	156.031	No
1004	Registered_Pos01_Processed_Follicle_01.tif	10	59	44	237	153.929	127.271	155.322	No
1005	Registered_Pos01_Processed_Follicle_01.tif	10	60	44	238	153.929	127.271	156.03	No
1006	Registered_Pos01_Processed_Follicle_01.tif	10	61	44	238	153.929	127.271	156.03	No
1007	Registered_Pos01_Processed_Follicle_01.tif	10	62	44	238	153.929	127.271	156.03	No
1008	Registered_Pos01_Processed_Follicle_01.tif	10	63	44	238	153.929	127.271	156.03	No
1009	Registered_Pos01_Processed_Follicle_01.tif	10	64	44	238	153.929	127.271	156.03	No
1010	Registered_Pos01_Processed_Follicle_01.tif	10	65	45	238	153.929	127.271	155.327	No
1011	Registered_Pos01_Processed_Follicle_01.tif	10	66	45	238	153.929	127.271	155.327	No
1012	Registered_Pos01_Processed_Follicle_01.tif	10	67	45	238	153.929	127.271	155.327	No
1013	Registered_Pos01_Processed_Follicle_01.tif	10	68	46	238	153.929	127.271	154.627	No
1014	Registered_Pos01_Processed_Follicle_01.tif	10	69	47	236	153.929	127.271	152.498	No
1015	Registered_Pos01_Processed_Follicle_01.tif	10	70	50	235	153.929	127.271	149.689	No
1016	Registered_Pos01_Processed_Follicle_01.tif	10	71	50	235	153.929	127.271	149.689	No
1017	Registered_Pos01_Processed_Follicle_01.tif	10	72	49	234	153.929	127.271	149.67	No
1018	Registered_Pos01_Processed_Follicle_01.tif	10	73	51	236	153.929	127.271	149.721	No
1019	Registered_Pos01_Processed_Follicle_01.tif	10	74	51	237	153.929	127.271	150.449	No
1020	Registered_Pos01_Processed_Follicle_01.tif	10	75	50	236	153.929	127.271	150.41	No
1021	Registered_Pos01_Processed_Follicle_01.tif	10	76	51	235	153.929	127.271	148.996	No
1022	Registered_Pos01_Processed_Follicle_01.tif	10	77	50	234	153.929	127.271	148.971	No
1023	Registered_Pos01_Processed_Follicle_01.tif	10	78	49	231	153.929	127.271	147.546	No
1024	Registered_Pos01_Processed_Follicle_01.tif	10	79	50	230	153.929	127.271	146.132	No
1025	Registered_Pos01_Processed_Follicle_01.tif	10	80	49	231	153.929	127.271	147.546	No
1026	Registered_Pos01_Processed_Follicle_01.tif	10	81	49	231	153.929	127.271	147.546	No
1027	Registered_Pos01_Processed_Follicle_01.tif	10	82	50	233	153.929	127.271	148.256	No
1028	Registered_Pos01_Processed_Follicle_01.tif	10	83	50	233	153.929	127.271	148.256	No
1029	Registered_Pos01_Processed_Follicle_01.tif	10	84	51	234	153.929	127.271	148.275	No
1030	Registered_Pos01_Processed_Follicle_01.tif	10	85	51	236	153.929	127.271	149.721	No
1031	Registered_Pos01_Processed_Follicle_01.tif	10	86	51	236	153.929	127.271	149.721	No
1032	Registered_Pos01_Processed_Follicle_01.tif	10	87	50	236	153.929	127.271	150.41	No
1033	Registered_Pos01_Processed_Follicle_01.tif	10	88	46	240	153.929	127.271	156.065	No
1034	Registered_Pos01_Processed_Follicle_01.tif	10	89	42	237	153.929	127.271	156.743	No
1035	Registered_Pos01_Processed_Follicle_01.tif	10	90	43	238	153.929	127.271	156.736	No
1036	Registered_Pos01_Processed_Follicle_01.tif	10	91	46	238	153.929	127.271	154.627	No
1037	Registered_Pos01_Processed_Follicle_01.tif	10	92	45	239	153.929	127.271	156.041	No
1038	Registered_Pos01_Processed_Follicle_01.tif	10	93	44	238	153.929	127.271	156.03	No
1039	Registered_Pos01_Processed_Follicle_01.tif	10	94	45	238	153.929	127.271	155.327	No
1040	Registered_Pos01_Processed_Follicle_01.tif	10	95	46	236	153.929	127.271	153.201	No
1041	Registered_Pos01_Processed_Follicle_01.tif	10	96	45	236	153.929	127.271	153.907	No
1042	Registered_Pos01_Processed_Follicle_01.tif	10	97	46	239	153.929	127.271	155.345	No
1043	Registered_Pos01_Processed_Follicle_01.tif	10	98	47	239	153.929	127.271	154.652	No
1044	Registered_Pos01_Processed_Follicle_01.tif	10	99	49	237	153.929	127.271	151.824	No
1045	Registered_Pos01_Processed_Follicle_01.tif	10	100	48	238	153.929	127.271	153.238	No
1046	Registered_Pos01_Processed_Follicle_01.tif	10	101	50	237	153.929	127.271	151.135	No
1047	Registered_Pos01_Processed_Follicle_01.tif	10	102	51	236	153.929	127.271	149.721	No
1048	Registered_Pos01_Processed_Follicle_01.tif	10	103	50	236	153.929	127.271	150.41	No
1049	Registered_Pos01_Processed_Follicle_01.tif	10	104	52	236	153.929	127.271	149.035	No
1050	Registered_Pos01_Processed_Follicle_01.tif	10	105	50	239	153.929	127.271	152.593	No
1051	Registered_Pos01_Processed_Follicle_01.tif	10	106	50	239	153.929	127.271	152.593	No
1052	Registered_Pos01_Processed_Follicle_01.tif	10	107	50	239	153.929	127.271	152.593	No
1053	Registered_Pos01_Processed_Follicle_01.tif	10	108	42	238	153.929	127.271	157.445	No
1054	Registered_Pos01_Processed_Follicle_01.tif	10	109	38	234	153.929	127.271	157.577	No
1055	Registered_Pos01_Processed_Follicle_01.tif	10	110	40	234	153.929	127.271	156.112	No
1056	Registered_Pos01_Processed_Follicle_01.tif	10	111	40	234	153.929	127.271	156.112	No
1057	Registered_Pos01_Processed_Follicle_01.tif	10	112	40	234	153.929	127.271	156.112	No
1058	Registered_Pos01_Processed_Follicle_01.tif	10	113	43	235	153.929	127.271	154.631	No
1059	Registered_Pos01_Processed_Follicle_01.tif	10	114	46	233	153.929	127.271	151.087	No
1060	Registered_Pos01_Processed_Follicle_01.tif	10	115	50	233	153.929	127.271	148.256	No
1061	Registered_Pos01_Processed_Follicle_01.tif	10	116	52	236	153.929	127.271	149.035	No
1062	Registered_Pos01_Processed_Follicle_01.tif	10	117	53	233	153.929	127.271	146.168	No
1063	Registered_Pos01_Processed_Follicle_01.tif	10	118	56	231	153.929	127.271	142.653	No
1064	Registered_Pos01_Processed_Follicle_01.tif	10	119	62	236	153.929	127.271	142.383	No
1065	Registered_Pos01_Processed_Follicle_01.tif	10	120	67	238	153.929	127.271	140.775	No
1066	Registered_Pos01_Processed_Follicle_01.tif	10	121	64	235	153.929	127.271	140.331	No
1067	Registered_Pos01_Processed_Follicle_01.tif	10	122	69	237	153.929	127.271	138.756	No
1068	Registered_Pos01_Processed_Follicle_01.tif	10	123	69	236	153.929	127.271	137.967	No
1069	Registered_Pos01_Processed_Follicle_01.tif	10	124	69	235	153.929	127.271	137.18	No
1070	Registered_Pos01_Processed_Follicle_01.tif	10	125	71	236	153.929	127.271	136.745	No
1071	Registered_Pos01_Processed_Follicle_01.tif	10	126	75	235	153.929	127.271	133.549	No
1072	Registered_Pos01_Processed_Follicle_01.tif	10	127	73	236	153.929	127.271	135.541	No
1073	Registered_Pos01_Processed_Follicle_01.tif	10	128	75	236	153.929	127.271	134.357	No
1074	Registered_Pos01_Processed_Follicle_01.tif	10	129	74	236	153.929	127.271	134.947	No
1075	Registered_Pos01_Processed_Follicle_01.tif	10	130	74	234	153.929	127.271	133.34	No
1076	Registered_Pos01_Processed_Follicle_01.tif	10	131	74	233	153.929	127.271	132.541	No
1077	Registered_Pos01_Processed_Follicle_01.tif	10	132	74	233	153.929	127.271	132.541	No
1078	Registered_Pos01_Processed_Follicle_01.tif	10	133	74	235	153.929	127.271	134.142	No
1079	Registered_Pos01_Processed_Follicle_01.tif	10	134	74	235	153.929	127.271	134.142	No
1080	Registered_Pos01_Processed_Follicle_01.tif	10	135	74	233	153.929	127.271	132.541	No
1081	Registered_Pos01_Processed_Follicle_01.tif	10	136	74	235	153.929	127.271	134.142	No
1082	Registered_Pos01_Processed_Follicle_01.tif	10	137	76	233	153.929	127.271	131.345	No
1083	Registered_Pos01_Processed_Follicle_01.tif	10	138	74	229	153.929	127.271	129.373	No
1084	Registered_Pos01_Processed_Follicle_01.tif	10	139	72	218	153.929	127.271	122.246	No
1085	Registered_Pos01_Processed_Follicle_01.tif	10	140	70	216	153.929	127.271	122.135	No
1086	Registered_Pos01_Processed_Follicle_01.tif	10	141	71	216	153.929	127.271	121.45	No
1087	Registered_Pos01_Processed_Follicle_01.tif	10	142	71	213	153.929	127.271	119.275	No
1088	Registered_Pos01_Processed_Follicle_01.tif	10	143	72	212	153.929	127.271	117.862	No
1089	Registered_Pos01_Processed_Follicle_01.tif	10	144	71	211	153.929	127.271	117.846	No
1090	Registered_Pos01_Processed_Follicle_01.tif	10	145	71	207	153.929	127.271	115.039	No
1091	Registered_Pos01_Processed_Follicle_01.tif	10	146	70	201	153.929	127.271	111.714	No
1092	Registered_Pos01_Processed_Follicle_01.tif	10	147	70	201	153.929	127.271	111.714	No
1093	Registered_Pos01_Processed_Follicle_01.tif	10	148	68	197	153.929	127.271	110.661	No
1094	Registered_Pos01_Processed_Follicle_01.tif	10	149	67	195	153.929	127.271	110.199	No
1095	Registered_Pos01_Processed_Follicle_01.tif	10	150	67	195	153.929	127.271	110.199	No
1096	Registered_Pos01_Processed_Follicle_01.tif	10	150	67	195	153.929	127.271	110.199	No
1097	Registered_Pos01_Processed_Follicle_01.tif	11	1	153	40	153.929	127.271	87.2763	No
1098	Registered_Pos01_Processed_Follicle_01.tif	11	2	156	40	153.929	127.271	87.2959	No
1099	Registered_Pos01_Processed_Follicle_01.tif	11	3	154	39	153.929	127.271	88.2714	No
1100	Registered_Pos01_Processed_Follicle_01.tif	11	4	154	39	153.929	127.271	88.2714	No
1101	Registered_Pos01_Processed_Follicle_01.tif	11	5	155	37	153.929	127.271	90.2777	No
1102	Registered_Pos01_Processed_Follicle_01.tif	11	6	155	38	153.929	127.271	89.2778	No
1103	Registered_Pos01_Processed_Follicle_01.tif	11	7	155	38	153.929	127.271	89.2778	No
1104	Registered_Pos01_Processed_Follicle_01.tif	11	8	155	39	153.929	127.271	88.2778	No
1105	Registered_Pos01_Processed_Follicle_01.tif	11	9	155	39	153.929	127.271	88.2778	No
1106	Registered_Pos01_Processed_Follicle_01.tif	11	10	157	39	153.929	127.271	88.3247	No
1107	Registered_Pos01_Processed_Follicle_01.tif	11	11	157	39	153.929	127.271	88.3247	No
1108	Registered_Pos01_Processed_Follicle_01.tif	11	12	158	43	153.929	127.271	84.3696	No
1109	Registered_Pos01_Processed_Follicle_01.tif	11	13	159	43	153.929	127.271	84.4238	No
1110	Registered_Pos01_Processed_Follicle_01.tif	11	14	159	43	153.929	127.271	84.4238	No
1111	Registered_Pos01_Processed_Follicle_01.tif	11	15	160	46	153.929	127.271	81.4978	No
1112	Registered_Pos01_Processed_Follicle_01.tif	11	16	160	46	153.929	127.271	81.4978	No
1113	Registered_Pos01_Processed_Follicle_01.tif	11	17	160	44	153.929	127.271	83.4923	No
1114	Registered_Pos01_Processed_Follicle_01.tif	11	18	160	46	153.929	127.271	81.4978	No
1115	Registered_Pos01_Processed_Follicle_01.tif	11	19	160	46	153.929	127.271	81.4978	No
1116	Registered_Pos01_Processed_Follicle_01.tif	11	20	161	47	153.929	127.271	80.5822	No
1117	Registered_Pos01_Processed_Follicle_01.tif	11	21	161	47	153.929	127.271	80.5822	No
1118	Registered_Pos01_Processed_Follicle_01.tif	11	22	159	47	153.929	127.271	80.4313	No
1119	Registered_Pos01_Processed_Follicle_01.tif	11	23	158	47	153.929	127.271	80.3745	No
1120	Registered_Pos01_Processed_Follicle_01.tif	11	24	158	48	153.929	127.271	79.3758	No
1121	Registered_Pos01_Processed_Follicle_01.tif	11	25	158	48	153.929	127.271	79.3758	No
1122	Registered_Pos01_Processed_Follicle_01.tif	11	26	158	48	153.929	127.271	79.3758	No
1123	Registered_Pos01_Processed_Follicle_01.tif	11	27	158	48	153.929	127.271	79.3758	No
1124	Registered_Pos01_Processed_Follicle_01.tif	11	28	160	48	153.929	127.271	79.5035	No
1125	Registered_Pos01_Processed_Follicle_01.tif	11	29	160	48	153.929	127.271	79.5035	No
1126	Registered_Pos01_Processed_Follicle_01.tif	11	30	160	49	153.929	127.271	78.5064	No
1127	Registered_Pos01_Processed_Follicle_01.tif	11	31	160	49	153.929	127.271	78.5064	No
1128	Registered_Pos01_Processed_Follicle_01.tif	11	32	160	47	153.929	127.271	80.5006	No
1129	Registered_Pos01_Processed_Follicle_01.tif	11	33	160	47	153.929	127.271	80.5006	No
1130	Registered_Pos01_Processed_Follicle_01.tif	11	34	162	48	153.929	127.271	79.6811	No
1131	Registered_Pos01_Processed_Follicle_01.tif	11	35	160	48	153.929	127.271	79.5035	No
1132	Registered_Pos01_Processed_Follicle_01.tif	11	36	161	47	153.929	127.271	80.5822	No
1133	Registered_Pos01_Processed_Follicle_01.tif	11	37	161	50	153.929	127.271	77.5942	No
1134	Registered_Pos01_Processed_Follicle_01.tif	11	38	164	52	153.929	127.271	75.9421	No
1135	Registered_Pos01_Processed_Follicle_01.tif	11	39	164	52	153.929	127.271	75.9421	No
1136	Registered_Pos01_Processed_Follicle_01.tif	11	40	164	54	153.929	127.271	73.9602	No
1137	Registered_Pos01_Processed_Follicle_01.tif	11	41	167	57	153.929	127.271	71.4766	No
1138	Registered_Pos01_Processed_Follicle_01.tif	11	42	171	59	153.929	127.271	70.3732	No
1139	Registered_Pos01_Processed_Follicle_01.tif	11	43	171	61	153.929	127.271	68.4347	No
1140	Registered_Pos01_Processed_Follicle_01.tif	11	44	171	62	153.929	127.271	67.4668	No
1141	Registered_Pos01_Processed_Follicle_01.tif	11	45	173	64	153.929	127.271	66.083	No
1142	Registered_Pos01_Processed_Follicle_01.tif	11	46	173	65	153.929	127.271	65.1262	No
1143	Registered_Pos01_Processed_Follicle_01.tif	11	47	173	65	153.929	127.271	65.1262	No
1144	Registered_Pos01_Processed_Follicle_01.tif	11	48	176	68	153.929	127.271	63.2473	No
1145	Registered_Pos01_Processed_Follicle_01.tif	11	49	173	70	153.929	127.271	60.3631	No
1146	Registered_Pos01_Processed_Follicle_01.tif	11	50	174	71	153.929	127.271	59.7437	No
1147	Registered_Pos01_Processed_Follicle_01.tif	11	51	173	70	153.929	127.271	60.3631	No
1148	Registered_Pos01_Processed_Follicle_01.tif	11	52	170	71	153.929	127.271	58.5213	No
1149	Registered_Pos01_Processed_Follicle_01.tif	11	53	173	72	153.929	127.271	58.469	No
1150	Registered_Pos01_Processed_Follicle_01.tif	11	54	173	71	153.929	127.271	59.4152	No
1151	Registered_Pos01_Processed_Follicle_01.tif	11	55	173	71	153.929	127.271	59.4152	No
1152	Registered_Pos01_Processed_Follicle_01.tif	11	56	169	71	153.929	127.271	58.2546	No
1153	Registered_Pos01_Processed_Follicle_01.tif	11	57	172	72	153.929	127.271	58.1505	No
1154	Registered_Pos01_Processed_Follicle_01.tif	11	58	172	71	153.929	127.271	59.1018	No
1155	Registered_Pos01_Processed_Follicle_01.tif	11	59	172	73	153.929	127.271	57.2008	No
1156	Registered_Pos01_Processed_Follicle_01.tif	11	60	171	73	153.929	127.271	56.8928	No
1157	Registered_Pos01_Processed_Follicle_01.tif	11	61	162	74	153.929	127.271	53.8793	No
1158	Registered_Pos01_Processed_Follicle_01.tif	11	62	168	76	153.929	127.271	53.1671	No
1159	Registered_Pos01_Processed_Follicle_01.tif	11	63	175	76	153.929	127.271	55.4322	No
1160	Registered_Pos01_Processed_Follicle_01.tif	11	64	170	75	153.929	127.271	54.6861	No
1161	Registered_Pos01_Processed_Follicle_01.tif	11	65	171	75	153.929	127.271	54.9883	No
1162	Registered_Pos01_Processed_Follicle_01.tif	11	66	173	77	153.929	127.271	53.7671	No
1163	Registered_Pos01_Processed_Follicle_01.tif	11	67	175	76	153.929	127.271	55.4322	No
1164	Registered_Pos01_Processed_Follicle_01.tif	11	68	174	76	153.929	127.271	55.0599	No
1165	Registered_Pos01_Processed_Follicle_01.tif	11	69	170	77	153.929	127.271	52.7777	No
1166	Registered_Pos01_Processed_Follicle_01.tif	11	70	163	77	153.929	127.271	51.0832	No
1167	Registered_Pos01_Processed_Follicle_01.tif	11	71	161	78	153.929	127.271	49.7761	Yes
1168	Registered_Pos01_Processed_Follicle_01.tif	11	72	159	79	153.929	127.271	48.537	Yes
1169	Registered_Pos01_Processed_Follicle_01.tif	11	73	159	79	153.929	127.271	48.537	Yes
1170	Registered_Pos01_Processed_Follicle_01.tif	11	74	161	79	153.929	127.271	48.7865	Yes
1171	Registered_Pos01_Processed_Follicle_01.tif	11	75	163	79	153.929	127.271	49.1162	Yes
1172	Registered_Pos01_Processed_Follicle_01.tif	11	76	155	79	153.929	127.271	48.2832	Yes
1173	Registered_Pos01_Processed_Follicle_01.tif	11	77	152	78	153.929	127.271	49.3091	Yes
1174	Registered_Pos01_Processed_Follicle_01.tif	11	78	150	77	153.929	127.271	50.4247	No
1175	Registered_Pos01_Processed_Follicle_01.tif	11	79	150	75	153.929	127.271	52.4188	No
1176	Registered_Pos01_Processed_Follicle_01.tif	11	80	150	75	153.929	127.271	52.4188	No
1177	Registered_Pos01_Processed_Follicle_01.tif	11	81	150	75	153.929	127.271	52.4188	No
1178	Registered_Pos01_Processed_Follicle_01.tif	11	82	150	75	153.929	127.271	52.4188	No
1179	Registered_Pos01_Processed_Follicle_01.tif	11	83	152	75	153.929	127.271	52.3069	No
1180	Registered_Pos01_Processed_Follicle_01.tif	11	84	154	78	153.929	127.271	49.2714	Yes
1181	Registered_Pos01_Processed_Follicle_01.tif	11	85	154	78	153.929	127.271	49.2714	Yes
1182	Registered_Pos01_Processed_Follicle_01.tif	11	86	154	78	153.929	127.271	49.2714	Yes
1183	Registered_Pos01_Processed_Follicle_01.tif	11	87	156	78	153.929	127.271	49.3148	Yes
1184	Registered_Pos01_Processed_Follicle_01.tif	11	88	156	78	153.929	127.271	49.3148	Yes
1185	Registered_Pos01_Processed_Follicle_01.tif	11	89	156	78	153.929	127.271	49.3148	Yes
1186	Registered_Pos01_Processed_Follicle_01.tif	11	90	152	78	153.929	127.271	49.3091	Yes
1187	Registered_Pos01_Processed_Follicle_01.tif	11	91	152	78	153.929	127.271	49.3091	Yes
1188	Registered_Pos01_Processed_Follicle_01.tif	11	92	153	79	153.929	127.271	48.2803	Yes
1189	Registered_Pos01_Processed_Follicle_01.tif	11	93	152	79	153.929	127.271	48.3099	Yes
1190	Registered_Pos01_Processed_Follicle_01.tif	11	94	151	79	153.929	127.271	48.3601	Yes
1191	Registered_Pos01_Processed_Follicle_01.tif	11	95	151	79	153.929	127.271	48.3601	Yes
1192	Registered_Pos01_Processed_Follicle_01.tif	11	96	150	79	153.929	127.271	48.431	Yes
1193	Registered_Pos01_Processed_Follicle_01.tif	11	97	150	79	153.929	127.271	48.431	Yes
1194	Registered_Pos01_Processed_Follicle_01.tif	11	98	150	79	153.929	127.271	48.431	Yes
1195	Registered_Pos01_Processed_Follicle_01.tif	11	99	150	79	153.929	127.271	48.431	Yes
1196	Registered_Pos01_Processed_Follicle_01.tif	11	100	151	79	153.929	127.271	48.3601	Yes
1197	Registered_Pos01_Processed_Follicle_01.tif	11	101	151	79	153.929	127.271	48.3601	Yes
1198	Registered_Pos01_Processed_Follicle_01.tif	11	102	151	79	153.929	127.271	48.3601	Yes
1199	Registered_Pos01_Processed_Follicle_01.tif	11	103	152	79	153.929	127.271	48.3099	Yes
1200	Registered_Pos01_Processed_Follicle_01.tif	11	104	152	79	153.929	127.271	48.3099	Yes
1201	Registered_Pos01_Processed_Follicle_01.tif	11	105	151	79	153.929	127.271	48.3601	Yes
1202	Registered_Pos01_Processed_Follicle_01.tif	11	106	151	81	153.929	127.271	46.364	Yes
1203	Registered_Pos01_Processed_Follicle_01.tif	11	107	151	81	153.929	127.271	46.364	Yes
1204	Registered_Pos01_Processed_Follicle_01.tif	11	108	152	80	153.929	127.271	47.3107	Yes
1205	Registered_Pos01_Processed_Follicle_01.tif	11	109	153	80	153.929	127.271	47.2805	Yes
1206	Registered_Pos01_Processed_Follicle_01.tif	11	110	155	82	153.929	127.271	45.284	Yes
1207	Registered_Pos01_Processed_Follicle_01.tif	11	111	160	82	153.929	127.271	45.6766	Yes
1208	Registered_Pos01_Processed_Follicle_01.tif	11	112	162	82	153.929	127.271	45.9851	Yes
1209	Registered_Pos01_Processed_Follicle_01.tif	11	113	164	84	153.929	127.271	44.4278	Yes
1210	Registered_Pos01_Processed_Follicle_01.tif	11	114	165	84	153.929	127.271	44.6651	Yes
1211	Registered_Pos01_Processed_Follicle_01.tif	11	115	166	82	153.929	127.271	46.853	Yes
1212	Registered_Pos01_Processed_Follicle_01.tif	11	116	165	82	153.929	127.271	46.6053	Yes
1213	Registered_Pos01_Processed_Follicle_01.tif	11	117	165	82	153.929	127.271	46.6053	Yes
1214	Registered_Pos01_Processed_Follicle_01.tif	11	118	165	82	153.929	127.271	46.6053	Yes
1215	Registered_Pos01_Processed_Follicle_01.tif	11	119	165	83	153.929	127.271	45.6346	Yes
1216	Registered_Pos01_Processed_Follicle_01.tif	11	120	165	82	153.929	127.271	46.6053	Yes
1217	Registered_Pos01_Processed_Follicle_01.tif	11	121	165	82	153.929	127.271	46.6053	Yes
1218	Registered_Pos01_Processed_Follicle_01.tif	11	122	165	82	153.929	127.271	46.6053	Yes
1219	Registered_Pos01_Processed_Follicle_01.tif	11	123	165	82	153.929	127.271	46.6053	Yes
1220	Registered_Pos01_Processed_Follicle_01.tif	11	124	165	82	153.929	127.271	46.6053	Yes
1221	Registered_Pos01_Processed_Follicle_01.tif	11	125	165	82	153.929	127.271	46.6053	Yes
1222	Registered_Pos01_Processed_Follicle_01.tif	11	126	165	82	153.929	127.271	46.6053	Yes
1223	Registered_Pos01_Processed_Follicle_01.tif	11	127	166	84	153.929	127.271	44.9234	Yes
1224	Registered_Pos01_Processed_Follicle_01.tif	11	128	171	87	153.929	127.271	43.7401	Yes
1225	Registered_Pos01_Processed_Follicle_01.tif	11	129	174	89	153.929	127.271	43.215	Yes
1226	Registered_Pos01_Processed_Follicle_01.tif	11	130	175	90	153.929	127.271	42.8151	Yes
1227	Registered_Pos01_Processed_Follicle_01.tif	11	131	179	91	153.929	127.271	44.0926	Yes
1228	Registered_Pos01_Processed_Follicle_01.tif	11	132	180	92	153.929	127.271	43.8607	Yes
1229	Registered_Pos01_Processed_Follicle_01.tif	11	133	182	92	153.929	127.271	45.0782	Yes
1230	Registered_Pos01_Processed_Follicle_01.tif	11	134	183	93	153.929	127.271	44.9404	Yes
1231	Registered_Pos01_Processed_Follicle_01.tif	11	135	187	95	153.929	127.271	46.2074	Yes
1232	Registered_Pos01_Processed_Follicle_01.tif	11	136	190	96	153.929	127.271	47.7389	Yes
1233	Registered_Pos01_Processed_Follicle_01.tif	11	137	190	97	153.929	127.271	47.0899	Yes
1234	Registered_Pos01_Processed_Follicle_01.tif	11	138	188	99	153.929	127.271	44.2729	Yes
1235	Registered_Pos01_Processed_Follicle_01.tif	11	139	191	97	153.929	127.271	47.8603	Yes
1236	Registered_Pos01_Processed_Follicle_01.tif	11	140	191	100	153.929	127.271	46.0215	Yes
1237	Registered_Pos01_Processed_Follicle_01.tif	11	141	193	101	153.929	127.271	47.082	Yes
1238	Registered_Pos01_Processed_Follicle_01.tif	11	142	190	103	153.929	127.271	43.4765	Yes
1239	Registered_Pos01_Processed_Follicle_01.tif	11	143	189	100	153.929	127.271	44.4263	Yes
1240	Registered_Pos01_Processed_Follicle_01.tif	11	144	189	100	153.929	127.271	44.4263	Yes
1241	Registered_Pos01_Processed_Follicle_01.tif	11	145	187	101	153.929	127.271	42.2358	Yes
1242	Registered_Pos01_Processed_Follicle_01.tif	11	146	187	101	153.929	127.271	42.2358	Yes
1243	Registered_Pos01_Processed_Follicle_01.tif	11	147	185	101	153.929	127.271	40.6889	Yes
1244	Registered_Pos01_Processed_Follicle_01.tif	11	148	186	98	153.929	127.271	43.4206	Yes
1245	Registered_Pos01_Processed_Follicle_01.tif	11	149	185	98	153.929	127.271	42.6874	Yes
1246	Registered_Pos01_Processed_Follicle_01.tif	11	150	186	97	153.929	127.271	44.101	Yes
1247	Registered_Pos01_Processed_Follicle_01.tif	12	1	39	156	153.929	127.271	118.465	No
1248	Registered_Pos01_Processed_Follicle_01.tif	12	2	38	155	153.929	127.271	119.199	No
1249	Registered_Pos01_Processed_Follicle_01.tif	12	3	37	154	153.929	127.271	119.945	No
1250	Registered_Pos01_Processed_Follicle_01.tif	12	4	38	153	153.929	127.271	118.75	No
1251	Registered_Pos01_Processed_Follicle_01.tif	12	5	36	151	153.929	127.271	120.293	No
1252	Registered_Pos01_Processed_Follicle_01.tif	12	6	35	150	153.929	127.271	121.082	No
1253	Registered_Pos01_Processed_Follicle_01.tif	12	7	35	152	153.929	127.271	121.473	No
1254	Registered_Pos01_Processed_Follicle_01.tif	12	8	35	152	153.929	127.271	121.473	No
1255	Registered_Pos01_Processed_Follicle_01.tif	12	9	35	152	153.929	127.271	121.473	No
1256	Registered_Pos01_Processed_Follicle_01.tif	12	10	35	152	153.929	127.271	121.473	No
1257	Registered_Pos01_Processed_Follicle_01.tif	12	11	35	152	153.929	127.271	121.473	No
1258	Registered_Pos01_Processed_Follicle_01.tif	12	12	34	151	153.929	127.271	122.254	No
1259	Registered_Pos01_Processed_Follicle_01.tif	12	13	34	151	153.929	127.271	122.254	No
1260	Registered_Pos01_Processed_Follicle_01.tif	12	14	34	151	153.929	127.271	122.254	No
1261	Registered_Pos01_Processed_Follicle_01.tif	12	15	33	151	153.929	127.271	123.235	No
1262	Registered_Pos01_Processed_Follicle_01.tif	12	16	32	150	153.929	127.271	124.029	No
1263	Registered_Pos01_Processed_Follicle_01.tif	12	17	32	150	153.929	127.271	124.029	No
1264	Registered_Pos01_Processed_Follicle_01.tif	12	18	32	150	153.929	127.271	124.029	No
1265	Registered_Pos01_Processed_Follicle_01.tif	12	19	33	151	153.929	127.271	123.235	No
1266	Registered_Pos01_Processed_Follicle_01.tif	12	20	33	151	153.929	127.271	123.235	No
1267	Registered_Pos01_Processed_Follicle_01.tif	12	21	32	150	153.929	127.271	124.029	No
1268	Registered_Pos01_Processed_Follicle_01.tif	12	22	31	150	153.929	127.271	125.013	No
1269	Registered_Pos01_Processed_Follicle_01.tif	12	23	31	148	153.929	127.271	124.665	No
1270	Registered_Pos01_Processed_Follicle_01.tif	12	24	30	150	153.929	127.271	125.996	No
1271	Registered_Pos01_Processed_Follicle_01.tif	12	25	31	149	153.929	127.271	124.835	No
1272	Registered_Pos01_Processed_Follicle_01.tif	12	26	30	149	153.929	127.271	125.82	No
1273	Registered_Pos01_Processed_Follicle_01.tif	12	27	27	147	153.929	127.271	128.453	No
1274	Registered_Pos01_Processed_Follicle_01.tif	12	28	29	147	153.929	127.271	126.477	No
1275	Registered_Pos01_Processed_Follicle_01.tif	12	29	30	146	153.929	127.271	125.336	No
1276	Registered_Pos01_Processed_Follicle_01.tif	12	30	28	146	153.929	127.271	127.314	No
1277	Registered_Pos01_Processed_Follicle_01.tif	12	31	28	146	153.929	127.271	127.314	No
1278	Registered_Pos01_Processed_Follicle_01.tif	12	32	26	145	153.929	127.271	129.152	No
1279	Registered_Pos01_Processed_Follicle_01.tif	12	33	28	146	153.929	127.271	127.314	No
1280	Registered_Pos01_Processed_Follicle_01.tif	12	34	26	147	153.929	127.271	129.441	No
1281	Registered_Pos01_Processed_Follicle_01.tif	12	35	28	147	153.929	127.271	127.465	No
1282	Registered_Pos01_Processed_Follicle_01.tif	12	36	26	146	153.929	127.271	129.293	No
1283	Registered_Pos01_Processed_Follicle_01.tif	12	37	26	147	153.929	127.271	129.441	No
1284	Registered_Pos01_Processed_Follicle_01.tif	12	38	25	145	153.929	127.271	130.142	No
1285	Registered_Pos01_Processed_Follicle_01.tif	12	39	24	145	153.929	127.271	131.133	No
1286	Registered_Pos01_Processed_Follicle_01.tif	12	40	25	146	153.929	127.271	130.282	No
1287	Registered_Pos01_Processed_Follicle_01.tif	12	41	25	146	153.929	127.271	130.282	No
1288	Registered_Pos01_Processed_Follicle_01.tif	12	42	25	144	153.929	127.271	130.01	No
1289	Registered_Pos01_Processed_Follicle_01.tif	12	43	25	144	153.929	127.271	130.01	No
1290	Registered_Pos01_Processed_Follicle_01.tif	12	44	25	144	153.929	127.271	130.01	No
1291	Registered_Pos01_Processed_Follicle_01.tif	12	45	24	141	153.929	127.271	130.652	No
1292	Registered_Pos01_Processed_Follicle_01.tif	12	46	23	142	153.929	127.271	131.755	No
1293	Registered_Pos01_Processed_Follicle_01.tif	12	47	22	142	153.929	127.271	132.749	No
1294	Registered_Pos01_Processed_Follicle_01.tif	12	48	23	142	153.929	127.271	131.755	No
1295	Registered_Pos01_Processed_Follicle_01.tif	12	49	24	142	153.929	127.271	130.761	No
1296	Registered_Pos01_Processed_Follicle_01.tif	12	50	24	142	153.929	127.271	130.761	No
1297	Registered_Pos01_Processed_Follicle_01.tif	12	51	24	140	153.929	127.271	130.551	No
1298	Registered_Pos01_Processed_Follicle_01.tif	12	52	24	142	153.929	127.271	130.761	No
1299	Registered_Pos01_Processed_Follicle_01.tif	12	53	25	140	153.929	127.271	129.556	No
1300	Registered_Pos01_Processed_Follicle_01.tif	12	54	25	140	153.929	127.271	129.556	No
1301	Registered_Pos01_Processed_Follicle_01.tif	12	55	25	139	153.929	127.271	129.462	No
1302	Registered_Pos01_Processed_Follicle_01.tif	12	56	23	138	153.929	127.271	131.368	No
1303	Registered_Pos01_Processed_Follicle_01.tif	12	57	24	138	153.929	127.271	130.371	No
1304	Registered_Pos01_Processed_Follicle_01.tif	12	58	24	138	153.929	127.271	130.371	No
1305	Registered_Pos01_Processed_Follicle_01.tif	12	59	24	138	153.929	127.271	130.371	No
1306	Registered_Pos01_Processed_Follicle_01.tif	12	60	24	138	153.929	127.271	130.371	No
1307	Registered_Pos01_Processed_Follicle_01.tif	12	61	24	138	153.929	127.271	130.371	No
1308	Registered_Pos01_Processed_Follicle_01.tif	13	1	8	137	153.929	127.271	146.253	No
1309	Registered_Pos01_Processed_Follicle_01.tif	13	2	7	137	153.929	127.271	147.251	No
1310	Registered_Pos01_Processed_Follicle_01.tif	13	3	7	138	153.929	127.271	147.32	No
1311	Registered_Pos01_Processed_Follicle_01.tif	13	4	10	137	153.929	127.271	144.257	No
1312	Registered_Pos01_Processed_Follicle_01.tif	13	5	10	136	153.929	127.271	144.194	No
1313	Registered_Pos01_Processed_Follicle_01.tif	13	6	10	132	153.929	127.271	144.007	No
1314	Registered_Pos01_Processed_Follicle_01.tif	13	7	10	136	153.929	127.271	144.194	No
1315	Registered_Pos01_Processed_Follicle_01.tif	13	8	12	136	153.929	127.271	142.197	No
1316	Registered_Pos01_Processed_Follicle_01.tif	13	9	14	137	153.929	127.271	140.267	No
1317	Registered_Pos01_Processed_Follicle_01.tif	13	10	12	136	153.929	127.271	142.197	No
1318	Registered_Pos01_Processed_Follicle_01.tif	13	11	11	138	153.929	127.271	143.331	No
1319	Registered_Pos01_Processed_Follicle_01.tif	13	12	11	134	153.929	127.271	143.087	No
1320	Registered_Pos01_Processed_Follicle_01.tif	13	13	11	135	153.929	127.271	143.138	No
1321	Registered_Pos01_Processed_Follicle_01.tif	13	14	11	135	153.929	127.271	143.138	No
1322	Registered_Pos01_Processed_Follicle_01.tif	13	15	11	136	153.929	127.271	143.195	No
1323	Registered_Pos01_Processed_Follicle_01.tif	14	1	97	253	153.929	127.271	138.017	No
1324	Registered_Pos01_Processed_Follicle_01.tif	14	2	99	251	153.929	127.271	135.374	No
1325	Registered_Pos01_Processed_Follicle_01.tif	14	3	99	251	153.929	127.271	135.374	No
1326	Registered_Pos01_Processed_Follicle_01.tif	14	4	100	252	153.929	127.271	135.888	No
1327	Registered_Pos01_Processed_Follicle_01.tif	14	5	107	247	153.929	127.271	128.597	No
1328	Registered_Pos01_Processed_Follicle_01.tif	14	6	111	243	153.929	127.271	123.434	No
1329	Registered_Pos01_Processed_Follicle_01.tif	14	7	113	240	153.929	127.271	119.929	No
1330	Registered_Pos01_Processed_Follicle_01.tif	14	8	113	240	153.929	127.271	119.929	No
1331	Registered_Pos01_Processed_Follicle_01.tif	14	9	113	241	153.929	127.271	120.869	No
1332	Registered_Pos01_Processed_Follicle_01.tif	14	10	111	240	153.929	127.271	120.626	No
1333	Registered_Pos01_Processed_Follicle_01.tif	14	11	113	240	153.929	127.271	119.929	No
1334	Registered_Pos01_Processed_Follicle_01.tif	14	12	111	243	153.929	127.271	123.434	No
1335	Registered_Pos01_Processed_Follicle_01.tif	14	13	111	242	153.929	127.271	122.497	No
1336	Registered_Pos01_Processed_Follicle_01.tif	14	14	111	241	153.929	127.271	121.561	No
1337	Registered_Pos01_Processed_Follicle_01.tif	14	15	111	241	153.929	127.271	121.561	No
1338	Registered_Pos01_Processed_Follicle_01.tif	14	16	111	241	153.929	127.271	121.561	No
1339	Registered_Pos01_Processed_Follicle_01.tif	14	17	110	243	153.929	127.271	123.786	No
1340	Registered_Pos01_Processed_Follicle_01.tif	14	18	111	242	153.929	127.271	122.497	No
1341	Registered_Pos01_Processed_Follicle_01.tif	14	19	111	242	153.929	127.271	122.497	No
1342	Registered_Pos01_Processed_Follicle_01.tif	14	20	111	243	153.929	127.271	123.434	No
1343	Registered_Pos01_Processed_Follicle_01.tif	14	21	112	243	153.929	127.271	123.09	No
1344	Registered_Pos01_Processed_Follicle_01.tif	14	22	113	242	153.929	127.271	121.811	No
1345	Registered_Pos01_Processed_Follicle_01.tif	14	23	113	240	153.929	127.271	119.929	No
1346	Registered_Pos01_Processed_Follicle_01.tif	14	24	113	238	153.929	127.271	118.051	No
1347	Registered_Pos01_Processed_Follicle_01.tif	14	25	111	240	153.929	127.271	120.626	No
1348	Registered_Pos01_Processed_Follicle_01.tif	14	26	110	240	153.929	127.271	120.986	No
1349	Registered_Pos01_Processed_Follicle_01.tif	14	27	112	239	153.929	127.271	119.337	No
1350	Registered_Pos01_Processed_Follicle_01.tif	14	28	110	240	153.929	127.271	120.986	No
1351	Registered_Pos01_Processed_Follicle_01.tif	14	29	111	240	153.929	127.271	120.626	No
1352	Registered_Pos01_Processed_Follicle_01.tif	14	30	111	239	153.929	127.271	119.692	No
1353	Registered_Pos01_Processed_Follicle_01.tif	14	31	109	240	153.929	127.271	121.352	No
1354	Registered_Pos01_Processed_Follicle_01.tif	14	32	109	241	153.929	127.271	122.282	No
1355	Registered_Pos01_Processed_Follicle_01.tif	14	33	109	241	153.929	127.271	122.282	No
1356	Registered_Pos01_Processed_Follicle_01.tif	14	34	108	242	153.929	127.271	123.581	No
1357	Registered_Pos01_Processed_Follicle_01.tif	14	35	106	241	153.929	127.271	123.416	No
1358	Registered_Pos01_Processed_Follicle_01.tif	14	36	106	244	153.929	127.271	126.186	No
1359	Registered_Pos01_Processed_Follicle_01.tif	14	37	106	244	153.929	127.271	126.186	No
1360	Registered_Pos01_Processed_Follicle_01.tif	14	38	106	245	153.929	127.271	127.111	No
1361	Registered_Pos01_Processed_Follicle_01.tif	14	39	106	244	153.929	127.271	126.186	No
1362	Registered_Pos01_Processed_Follicle_01.tif	14	40	107	242	153.929	127.271	123.956	No
1363	Registered_Pos01_Processed_Follicle_01.tif	14	41	107	243	153.929	127.271	124.882	No
1364	Registered_Pos01_Processed_Follicle_01.tif	14	42	105	247	153.929	127.271	129.341	No
1365	Registered_Pos01_Processed_Follicle_01.tif	14	43	106	247	153.929	127.271	128.966	No
1366	Registered_Pos01_Processed_Follicle_01.tif	14	44	107	247	153.929	127.271	128.597	No
1367	Registered_Pos01_Processed_Follicle_01.tif	14	45	107	247	153.929	127.271	128.597	No
1368	Registered_Pos01_Processed_Follicle_01.tif	14	46	106	247	153.929	127.271	128.966	No
1369	Registered_Pos01_Processed_Follicle_01.tif	14	47	106	248	153.929	127.271	129.895	No
1370	Registered_Pos01_Processed_Follicle_01.tif	14	48	104	247	153.929	127.271	129.722	No
1371	Registered_Pos01_Processed_Follicle_01.tif	14	49	104	247	153.929	127.271	129.722	No
1372	Registered_Pos01_Processed_Follicle_01.tif	14	50	105	248	153.929	127.271	130.267	No
1373	Registered_Pos01_Processed_Follicle_01.tif	14	51	105	247	153.929	127.271	129.341	No
1374	Registered_Pos01_Processed_Follicle_01.tif	14	52	104	250	153.929	127.271	132.496	No
1375	Registered_Pos01_Processed_Follicle_01.tif	14	53	105	248	153.929	127.271	130.267	No
1376	Registered_Pos01_Processed_Follicle_01.tif	14	54	107	245	153.929	127.271	126.737	No
1377	Registered_Pos01_Processed_Follicle_01.tif	14	55	105	248	153.929	127.271	130.267	No
1378	Registered_Pos01_Processed_Follicle_01.tif	14	56	104	247	153.929	127.271	129.722	No
1379	Registered_Pos01_Processed_Follicle_01.tif	14	57	108	245	153.929	127.271	126.371	No
1380	Registered_Pos01_Processed_Follicle_01.tif	14	58	107	244	153.929	127.271	125.809	No
1381	Registered_Pos01_Processed_Follicle_01.tif	14	59	107	244	153.929	127.271	125.809	No
1382	Registered_Pos01_Processed_Follicle_01.tif	14	60	108	244	153.929	127.271	125.439	No
1383	Registered_Pos01_Processed_Follicle_01.tif	14	61	108	243	153.929	127.271	124.51	No
1384	Registered_Pos01_Processed_Follicle_01.tif	14	62	110	241	153.929	127.271	121.918	No
1385	Registered_Pos01_Processed_Follicle_01.tif	14	63	109	241	153.929	127.271	122.282	No
1386	Registered_Pos01_Processed_Follicle_01.tif	14	64	108	242	153.929	127.271	123.581	No
1387	Registered_Pos01_Processed_Follicle_01.tif	14	65	108	240	153.929	127.271	121.726	No
1388	Registered_Pos01_Processed_Follicle_01.tif	14	66	110	240	153.929	127.271	120.986	No
1389	Registered_Pos01_Processed_Follicle_01.tif	14	67	110	237	153.929	127.271	118.195	No
1390	Registered_Pos01_Processed_Follicle_01.tif	14	68	111	237	153.929	127.271	117.827	No
1391	Registered_Pos01_Processed_Follicle_01.tif	14	69	111	237	153.929	127.271	117.827	No
1392	Registered_Pos01_Processed_Follicle_01.tif	14	70	110	237	153.929	127.271	118.195	No
1393	Registered_Pos01_Processed_Follicle_01.tif	14	71	111	237	153.929	127.271	117.827	No
1394	Registered_Pos01_Processed_Follicle_01.tif	14	72	110	237	153.929	127.271	118.195	No
1395	Registered_Pos01_Processed_Follicle_01.tif	14	73	110	237	153.929	127.271	118.195	No
1396	Registered_Pos01_Processed_Follicle_01.tif	14	74	112	236	153.929	127.271	116.533	No
1397	Registered_Pos01_Processed_Follicle_01.tif	14	75	112	235	153.929	127.271	115.601	No
1398	Registered_Pos01_Processed_Follicle_01.tif	14	76	111	239	153.929	127.271	119.692	No
1399	Registered_Pos01_Processed_Follicle_01.tif	14	77	110	239	153.929	127.271	120.054	No
1400	Registered_Pos01_Processed_Follicle_01.tif	14	78	111	237	153.929	127.271	117.827	No
1401	Registered_Pos01_Processed_Follicle_01.tif	14	79	114	236	153.929	127.271	115.829	No
1402	Registered_Pos01_Processed_Follicle_01.tif	14	80	117	236	153.929	127.271	114.829	No
1403	Registered_Pos01_Processed_Follicle_01.tif	14	81	117	236	153.929	127.271	114.829	No
1404	Registered_Pos01_Processed_Follicle_01.tif	14	82	118	235	153.929	127.271	113.562	No
1405	Registered_Pos01_Processed_Follicle_01.tif	14	83	114	236	153.929	127.271	115.829	No
1406	Registered_Pos01_Processed_Follicle_01.tif	14	84	113	238	153.929	127.271	118.051	No
1407	Registered_Pos01_Processed_Follicle_01.tif	14	85	114	237	153.929	127.271	116.768	No
1408	Registered_Pos01_Processed_Follicle_01.tif	14	86	115	236	153.929	127.271	115.488	No
1409	Registered_Pos01_Processed_Follicle_01.tif	14	87	116	236	153.929	127.271	115.154	No
1410	Registered_Pos01_Processed_Follicle_01.tif	14	88	118	237	153.929	127.271	115.461	No
1411	Registered_Pos01_Processed_Follicle_01.tif	14	89	121	238	153.929	127.271	115.521	No
1412	Registered_Pos01_Processed_Follicle_01.tif	14	90	125	238	153.929	127.271	114.445	No
1413	Registered_Pos01_Processed_Follicle_01.tif	14	91	129	240	153.929	127.271	115.452	No
1414	Registered_Pos01_Processed_Follicle_01.tif	14	92	134	242	153.929	127.271	116.447	No
1415	Registered_Pos01_Processed_Follicle_01.tif	14	93	139	241	153.929	127.271	114.704	No
1416	Registered_Pos01_Processed_Follicle_01.tif	14	94	137	242	153.929	127.271	115.971	No
1417	Registered_Pos01_Processed_Follicle_01.tif	14	95	137	241	153.929	127.271	114.982	No
1418	Registered_Pos01_Processed_Follicle_01.tif	14	96	136	240	153.929	127.271	114.145	No
1419	Registered_Pos01_Processed_Follicle_01.tif	14	97	137	243	153.929	127.271	116.96	No
1420	Registered_Pos01_Processed_Follicle_01.tif	14	98	136	241	153.929	127.271	115.133	No
1421	Registered_Pos01_Processed_Follicle_01.tif	14	99	137	243	153.929	127.271	116.96	No
1422	Registered_Pos01_Processed_Follicle_01.tif	14	100	136	242	153.929	127.271	116.121	No
1423	Registered_Pos01_Processed_Follicle_01.tif	14	101	139	243	153.929	127.271	116.688	No
1424	Registered_Pos01_Processed_Follicle_01.tif	14	102	139	244	153.929	127.271	117.68	No
1425	Registered_Pos01_Processed_Follicle_01.tif	14	103	138	245	153.929	127.271	118.801	No
1426	Registered_Pos01_Processed_Follicle_01.tif	14	104	141	244	153.929	127.271	117.442	No
1427	Registered_Pos01_Processed_Follicle_01.tif	14	105	140	244	153.929	127.271	117.557	No
1428	Registered_Pos01_Processed_Follicle_01.tif	14	106	141	245	153.929	127.271	118.436	No
1429	Registered_Pos01_Processed_Follicle_01.tif	14	107	143	245	153.929	127.271	118.235	No
1430	Registered_Pos01_Processed_Follicle_01.tif	14	108	142	248	153.929	127.271	121.317	No
1431	Registered_Pos01_Processed_Follicle_01.tif	14	109	141	247	153.929	127.271	120.425	No
1432	Registered_Pos01_Processed_Follicle_01.tif	14	110	140	247	153.929	127.271	120.536	No
1433	Registered_Pos01_Processed_Follicle_01.tif	14	111	142	245	153.929	127.271	118.332	No
1434	Registered_Pos01_Processed_Follicle_01.tif	14	112	142	244	153.929	127.271	117.337	No
1435	Registered_Pos01_Processed_Follicle_01.tif	14	113	142	246	153.929	127.271	119.326	No
1436	Registered_Pos01_Processed_Follicle_01.tif	14	114	140	243	153.929	127.271	116.564	No
1437	Registered_Pos01_Processed_Follicle_01.tif	14	115	140	243	153.929	127.271	116.564	No
1438	Registered_Pos01_Processed_Follicle_01.tif	14	116	141	243	153.929	127.271	116.449	No
1439	Registered_Pos01_Processed_Follicle_01.tif	14	117	143	243	153.929	127.271	116.244	No
1440	Registered_Pos01_Processed_Follicle_01.tif	14	118	142	243	153.929	127.271	116.342	No
1441	Registered_Pos01_Processed_Follicle_01.tif	14	119	141	241	153.929	127.271	114.461	No
1442	Registered_Pos01_Processed_Follicle_01.tif	14	120	140	244	153.929	127.271	117.557	No
1443	Registered_Pos01_Processed_Follicle_01.tif	14	121	140	244	153.929	127.271	117.557	No
1444	Registered_Pos01_Processed_Follicle_01.tif	14	122	142	244	153.929	127.271	117.337	No
1445	Registered_Pos01_Processed_Follicle_01.tif	14	123	142	244	153.929	127.271	117.337	No
1446	Registered_Pos01_Processed_Follicle_01.tif	14	124	142	244	153.929	127.271	117.337	No
1447	Registered_Pos01_Processed_Follicle_01.tif	14	125	143	244	153.929	127.271	117.239	No
1448	Registered_Pos01_Processed_Follicle_01.tif	14	126	143	244	153.929	127.271	117.239	No
1449	Registered_Pos01_Processed_Follicle_01.tif	14	127	144	244	153.929	127.271	117.15	No
1450	Registered_Pos01_Processed_Follicle_01.tif	14	128	145	244	153.929	127.271	117.07	No
1451	Registered_Pos01_Processed_Follicle_01.tif	14	129	145	244	153.929	127.271	117.07	No
1452	Registered_Pos01_Processed_Follicle_01.tif	14	130	145	244	153.929	127.271	117.07	No
1453	Registered_Pos01_Processed_Follicle_01.tif	14	131	145	244	153.929	127.271	117.07	No
1454	Registered_Pos01_Processed_Follicle_01.tif	14	132	145	244	153.929	127.271	117.07	No
1455	Registered_Pos01_Processed_Follicle_01.tif	14	133	145	246	153.929	127.271	119.064	No
1456	Registered_Pos01_Processed_Follicle_01.tif	14	134	145	244	153.929	127.271	117.07	No
1457	Registered_Pos01_Processed_Follicle_01.tif	14	135	146	244	153.929	127.271	116.998	No
1458	Registered_Pos01_Processed_Follicle_01.tif	14	136	145	244	153.929	127.271	117.07	No
1459	Registered_Pos01_Processed_Follicle_01.tif	14	137	145	244	153.929	127.271	117.07	No
1460	Registered_Pos01_Processed_Follicle_01.tif	14	138	146	245	153.929	127.271	117.995	No
1461	Registered_Pos01_Processed_Follicle_01.tif	14	139	146	245	153.929	127.271	117.995	No
1462	Registered_Pos01_Processed_Follicle_01.tif	14	140	146	245	153.929	127.271	117.995	No
1463	Registered_Pos01_Processed_Follicle_01.tif	14	141	145	244	153.929	127.271	117.07	No
1464	Registered_Pos01_Processed_Follicle_01.tif	14	142	145	244	153.929	127.271	117.07	No
1465	Registered_Pos01_Processed_Follicle_01.tif	14	143	145	244	153.929	127.271	117.07	No
1466	Registered_Pos01_Processed_Follicle_01.tif	14	144	145	243	153.929	127.271	116.073	No
1467	Registered_Pos01_Processed_Follicle_01.tif	14	145	145	243	153.929	127.271	116.073	No
1468	Registered_Pos01_Processed_Follicle_01.tif	14	146	145	243	153.929	127.271	116.073	No
1469	Registered_Pos01_Processed_Follicle_01.tif	14	147	145	244	153.929	127.271	117.07	No
1470	Registered_Pos01_Processed_Follicle_01.tif	14	148	145	244	153.929	127.271	117.07	No
1471	Registered_Pos01_Processed_Follicle_01.tif	14	149	145	244	153.929	127.271	117.07	No
1472	Registered_Pos01_Processed_Follicle_01.tif	14	150	145	243	153.929	127.271	116.073	No
1473	Registered_Pos01_Processed_Follicle_01.tif	14	150	145	243	153.929	127.271	116.073	No
1474	Registered_Pos01_Processed_Follicle_01.tif	14	150	145	243	153.929	127.271	116.073	No
1475	Registered_Pos01_Processed_Follicle_01.tif	15	1	22	10	153.929	127.271	176.516	No
1476	Registered_Pos01_Processed_Follicle_01.tif	15	2	22	10	153.929	127.271	176.516	No
1477	Registered_Pos01_Processed_Follicle_01.tif	15	3	21	11	153.929	127.271	176.605	No
1478	Registered_Pos01_Processed_Follicle_01.tif	15	4	25	11	153.929	127.271	173.614	No
1479	Registered_Pos01_Processed_Follicle_01.tif	16	1	240	240	153.929	127.271	141.831	No
1480	Registered_Pos01_Processed_Follicle_01.tif	16	2	239	238	153.929	127.271	139.635	No
1481	Registered_Pos01_Processed_Follicle_01.tif	16	3	237	234	153.929	127.271	135.247	No
1482	Registered_Pos01_Processed_Follicle_01.tif	16	4	236	235	153.929	127.271	135.429	No
1483	Registered_Pos01_Processed_Follicle_01.tif	16	5	236	237	153.929	127.271	137.026	No
1484	Registered_Pos01_Processed_Follicle_01.tif	16	6	236	239	153.929	127.271	138.632	No
1485	Registered_Pos01_Processed_Follicle_01.tif	16	7	236	240	153.929	127.271	139.44	No
1486	Registered_Pos01_Processed_Follicle_01.tif	16	8	236	240	153.929	127.271	139.44	No
1487	Registered_Pos01_Processed_Follicle_01.tif	16	9	234	239	153.929	127.271	137.458	No
1488	Registered_Pos01_Processed_Follicle_01.tif	16	10	234	239	153.929	127.271	137.458	No
1489	Registered_Pos01_Processed_Follicle_01.tif	16	11	234	237	153.929	127.271	135.837	No
1490	Registered_Pos01_Processed_Follicle_01.tif	16	12	232	238	153.929	127.271	135.484	No
1491	Registered_Pos01_Processed_Follicle_01.tif	16	13	233	238	153.929	127.271	136.063	No
1492	Registered_Pos01_Processed_Follicle_01.tif	16	14	233	237	153.929	127.271	135.25	No
1493	Registered_Pos01_Processed_Follicle_01.tif	16	15	233	238	153.929	127.271	136.063	No
1494	Registered_Pos01_Processed_Follicle_01.tif	16	16	232	236	153.929	127.271	133.854	No
1495	Registered_Pos01_Processed_Follicle_01.tif	16	17	231	235	153.929	127.271	132.459	No
1496	Registered_Pos01_Processed_Follicle_01.tif	16	18	231	233	153.929	127.271	130.838	No
1497	Registered_Pos01_Processed_Follicle_01.tif	16	19	231	233	153.929	127.271	130.838	No
1498	Registered_Pos01_Processed_Follicle_01.tif	16	20	232	233	153.929	127.271	131.429	No
1499	Registered_Pos01_Processed_Follicle_01.tif	16	21	230	233	153.929	127.271	130.251	No
1500	Registered_Pos01_Processed_Follicle_01.tif	16	22	231	234	153.929	127.271	131.647	No
1501	Registered_Pos01_Processed_Follicle_01.tif	16	23	229	235	153.929	127.271	131.305	No
1502	Registered_Pos01_Processed_Follicle_01.tif	16	24	230	233	153.929	127.271	130.251	No
1503	Registered_Pos01_Processed_Follicle_01.tif	16	25	229	233	153.929	127.271	129.669	No
1504	Registered_Pos01_Processed_Follicle_01.tif	16	26	228	234	153.929	127.271	129.913	No
1505	Registered_Pos01_Processed_Follicle_01.tif	16	27	228	233	153.929	127.271	129.093	No
1506	Registered_Pos01_Processed_Follicle_01.tif	16	28	227	233	153.929	127.271	128.522	No
1507	Registered_Pos01_Processed_Follicle_01.tif	16	29	229	232	153.929	127.271	128.856	No
1508	Registered_Pos01_Processed_Follicle_01.tif	16	30	230	233	153.929	127.271	130.251	No
1509	Registered_Pos01_Processed_Follicle_01.tif	16	31	231	232	153.929	127.271	130.031	No
1510	Registered_Pos01_Processed_Follicle_01.tif	16	32	232	231	153.929	127.271	129.826	No
1511	Registered_Pos01_Processed_Follicle_01.tif	16	33	233	231	153.929	127.271	130.429	No
1512	Registered_Pos01_Processed_Follicle_01.tif	16	34	230	229	153.929	127.271	127.026	No
1513	Registered_Pos01_Processed_Follicle_01.tif	16	35	230	228	153.929	127.271	126.226	No
1514	Registered_Pos01_Processed_Follicle_01.tif	16	36	232	228	153.929	127.271	127.442	No
1515	Registered_Pos01_Processed_Follicle_01.tif	16	37	231	226	153.929	127.271	125.249	No
1516	Registered_Pos01_Processed_Follicle_01.tif	16	38	232	226	153.929	127.271	125.867	No
1517	Registered_Pos01_Processed_Follicle_01.tif	16	39	233	226	153.929	127.271	126.489	No
1518	Registered_Pos01_Processed_Follicle_01.tif	16	40	232	226	153.929	127.271	125.867	No
1519	Registered_Pos01_Processed_Follicle_01.tif	16	41	234	224	153.929	127.271	125.57	No
1520	Registered_Pos01_Processed_Follicle_01.tif	16	42	231	221	153.929	127.271	121.347	No
1521	Registered_Pos01_Processed_Follicle_01.tif	16	43	231	220	153.929	127.271	120.576	No
1522	Registered_Pos01_Processed_Follicle_01.tif	16	44	229	218	153.929	127.271	117.76	No
1523	Registered_Pos01_Processed_Follicle_01.tif	16	45	232	218	153.929	127.271	119.694	No
1524	Registered_Pos01_Processed_Follicle_01.tif	16	46	230	218	153.929	127.271	118.4	No
1525	Registered_Pos01_Processed_Follicle_01.tif	16	47	228	217	153.929	127.271	116.352	No
1526	Registered_Pos01_Processed_Follicle_01.tif	16	48	228	215	153.929	127.271	114.816	No
1527	Registered_Pos01_Processed_Follicle_01.tif	16	49	228	214	153.929	127.271	114.054	No
1528	Registered_Pos01_Processed_Follicle_01.tif	16	50	228	211	153.929	127.271	111.79	No
1529	Registered_Pos01_Processed_Follicle_01.tif	16	51	228	211	153.929	127.271	111.79	No
1530	Registered_Pos01_Processed_Follicle_01.tif	16	52	228	211	153.929	127.271	111.79	No
1531	Registered_Pos01_Processed_Follicle_01.tif	16	53	229	209	153.929	127.271	110.974	No
1532	Registered_Pos01_Processed_Follicle_01.tif	16	54	229	206	153.929	127.271	108.783	No
1533	Registered_Pos01_Processed_Follicle_01.tif	16	55	229	205	153.929	127.271	108.062	No
1534	Registered_Pos01_Processed_Follicle_01.tif	16	56	229	204	153.929	127.271	107.345	No
1535	Registered_Pos01_Processed_Follicle_01.tif	16	57	226	202	153.929	127.271	103.82	No
1536	Registered_Pos01_Processed_Follicle_01.tif	16	58	226	199	153.929	127.271	101.682	No
1537	Registered_Pos01_Processed_Follicle_01.tif	16	59	226	200	153.929	127.271	102.39	No
1538	Registered_Pos01_Processed_Follicle_01.tif	16	60	227	198	153.929	127.271	101.695	No
1539	Registered_Pos01_Processed_Follicle_01.tif	16	61	227	198	153.929	127.271	101.695	No
1540	Registered_Pos01_Processed_Follicle_01.tif	16	62	227	198	153.929	127.271	101.695	No
1541	Registered_Pos01_Processed_Follicle_01.tif	16	63	226	198	153.929	127.271	100.979	No
1542	Registered_Pos01_Processed_Follicle_01.tif	16	64	225	195	153.929	127.271	98.1745	No
1543	Registered_Pos01_Processed_Follicle_01.tif	16	65	225	197	153.929	127.271	99.5648	No
1544	Registered_Pos01_Processed_Follicle_01.tif	16	66	226	195	153.929	127.271	98.9009	No
1545	Registered_Pos01_Processed_Follicle_01.tif	16	67	226	195	153.929	127.271	98.9009	No
1546	Registered_Pos01_Processed_Follicle_01.tif	16	68	225	195	153.929	127.271	98.1745	No
1547	Registered_Pos01_Processed_Follicle_01.tif	16	69	226	193	153.929	127.271	97.5421	No
1548	Registered_Pos01_Processed_Follicle_01.tif	16	70	225	191	153.929	127.271	95.459	No
1549	Registered_Pos01_Processed_Follicle_01.tif	16	71	225	189	153.929	127.271	94.1355	No
1550	Registered_Pos01_Processed_Follicle_01.tif	16	72	225	187	153.929	127.271	92.8363	No
1551	Registered_Pos01_Processed_Follicle_01.tif	16	73	225	187	153.929	127.271	92.8363	No
1552	Registered_Pos01_Processed_Follicle_01.tif	16	74	225	186	153.929	127.271	92.1961	No
1553	Registered_Pos01_Processed_Follicle_01.tif	16	75	224	191	153.929	127.271	94.7168	No
1554	Registered_Pos01_Processed_Follicle_01.tif	16	76	224	193	153.929	127.271	96.0739	No
1555	Registered_Pos01_Processed_Follicle_01.tif	16	77	224	193	153.929	127.271	96.0739	No
1556	Registered_Pos01_Processed_Follicle_01.tif	16	78	225	194	153.929	127.271	97.4874	No
1557	Registered_Pos01_Processed_Follicle_01.tif	16	79	222	194	153.929	127.271	95.3224	No
1558	Registered_Pos01_Processed_Follicle_01.tif	16	80	224	193	153.929	127.271	96.0739	No
1559	Registered_Pos01_Processed_Follicle_01.tif	16	81	224	194	153.929	127.271	96.7607	No
1560	Registered_Pos01_Processed_Follicle_01.tif	16	82	224	194	153.929	127.271	96.7607	No
1561	Registered_Pos01_Processed_Follicle_01.tif	16	83	224	195	153.929	127.271	97.4531	No
1562	Registered_Pos01_Processed_Follicle_01.tif	16	84	224	195	153.929	127.271	97.4531	No
1563	Registered_Pos01_Processed_Follicle_01.tif	16	85	225	194	153.929	127.271	97.4874	No
1564	Registered_Pos01_Processed_Follicle_01.tif	16	86	226	195	153.929	127.271	98.9009	No
1565	Registered_Pos01_Processed_Follicle_01.tif	16	87	226	194	153.929	127.271	98.2188	No
1566	Registered_Pos01_Processed_Follicle_01.tif	16	88	226	194	153.929	127.271	98.2188	No
1567	Registered_Pos01_Processed_Follicle_01.tif	16	89	226	194	153.929	127.271	98.2188	No
1568	Registered_Pos01_Processed_Follicle_01.tif	16	90	226	194	153.929	127.271	98.2188	No
1569	Registered_Pos01_Processed_Follicle_01.tif	16	91	226	194	153.929	127.271	98.2188	No
1570	Registered_Pos01_Processed_Follicle_01.tif	16	92	225	195	153.929	127.271	98.1745	No
1571	Registered_Pos01_Processed_Follicle_01.tif	16	93	224	196	153.929	127.271	98.1507	No
1572	Registered_Pos01_Processed_Follicle_01.tif	16	94	224	194	153.929	127.271	96.7607	No
1573	Registered_Pos01_Processed_Follicle_01.tif	16	95	224	194	153.929	127.271	96.7607	No
1574	Registered_Pos01_Processed_Follicle_01.tif	16	96	226	193	153.929	127.271	97.5421	No
1575	Registered_Pos01_Processed_Follicle_01.tif	16	97	223	193	153.929	127.271	95.347	No
1576	Registered_Pos01_Processed_Follicle_01.tif	16	98	223	193	153.929	127.271	95.347	No
1577	Registered_Pos01_Processed_Follicle_01.tif	16	99	221	191	153.929	127.271	92.5194	No
1578	Registered_Pos01_Processed_Follicle_01.tif	16	100	221	192	153.929	127.271	93.2111	No
1579	Registered_Pos01_Processed_Follicle_01.tif	16	101	222	193	153.929	127.271	94.6251	No
1580	Registered_Pos01_Processed_Follicle_01.tif	16	102	223	194	153.929	127.271	96.0391	No
1581	Registered_Pos01_Processed_Follicle_01.tif	16	103	223	197	153.929	127.271	98.1472	No
1582	Registered_Pos01_Processed_Follicle_01.tif	16	104	226	198	153.929	127.271	100.979	No
1583	Registered_Pos01_Processed_Follicle_01.tif	16	105	228	199	153.929	127.271	103.109	No
1584	Registered_Pos01_Processed_Follicle_01.tif	16	106	230	199	153.929	127.271	104.555	No
1585	Registered_Pos01_Processed_Follicle_01.tif	16	107	229	199	153.929	127.271	103.83	No
1586	Registered_Pos01_Processed_Follicle_01.tif	16	108	224	201	153.929	127.271	101.715	No
1587	Registered_Pos01_Processed_Follicle_01.tif	16	109	226	197	153.929	127.271	100.281	No
1588	Registered_Pos01_Processed_Follicle_01.tif	16	110	227	197	153.929	127.271	101.002	No
1589	Registered_Pos01_Processed_Follicle_01.tif	16	111	227	198	153.929	127.271	101.695	No
1590	Registered_Pos01_Processed_Follicle_01.tif	16	112	229	201	153.929	127.271	105.221	No
1591	Registered_Pos01_Processed_Follicle_01.tif	16	113	229	201	153.929	127.271	105.221	No
1592	Registered_Pos01_Processed_Follicle_01.tif	16	114	228	198	153.929	127.271	102.416	No
1593	Registered_Pos01_Processed_Follicle_01.tif	16	115	229	200	153.929	127.271	104.523	No
1594	Registered_Pos01_Processed_Follicle_01.tif	16	116	229	198	153.929	127.271	103.142	No
1595	Registered_Pos01_Processed_Follicle_01.tif	16	117	229	199	153.929	127.271	103.83	No
1596	Registered_Pos01_Processed_Follicle_01.tif	16	118	229	199	153.929	127.271	103.83	No
1597	Registered_Pos01_Processed_Follicle_01.tif	16	119	226	199	153.929	127.271	101.682	No
1598	Registered_Pos01_Processed_Follicle_01.tif	16	120	226	201	153.929	127.271	103.103	No
1599	Registered_Pos01_Processed_Follicle_01.tif	16	121	228	201	153.929	127.271	104.51	No
1600	Registered_Pos01_Processed_Follicle_01.tif	16	122	228	199	153.929	127.271	103.109	No
1601	Registered_Pos01_Processed_Follicle_01.tif	16	123	228	199	153.929	127.271	103.109	No
1602	Registered_Pos01_Processed_Follicle_01.tif	16	124	227	199	153.929	127.271	102.393	No
1603	Registered_Pos01_Processed_Follicle_01.tif	16	125	227	201	153.929	127.271	103.804	No
1604	Registered_Pos01_Processed_Follicle_01.tif	16	126	229	201	153.929	127.271	105.221	No
1605	Registered_Pos01_Processed_Follicle_01.tif	16	127	229	200	153.929	127.271	104.523	No
1606	Registered_Pos01_Processed_Follicle_01.tif	16	128	229	200	153.929	127.271	104.523	No
1607	Registered_Pos01_Processed_Follicle_01.tif	16	129	229	200	153.929	127.271	104.523	No
1608	Registered_Pos01_Processed_Follicle_01.tif	16	130	228	199	153.929	127.271	103.109	No
1609	Registered_Pos01_Processed_Follicle_01.tif	16	131	229	199	153.929	127.271	103.83	No
1610	Registered_Pos01_Processed_Follicle_01.tif	16	132	226	200	153.929	127.271	102.39	No
1611	Registered_Pos01_Processed_Follicle_01.tif	16	133	228	201	153.929	127.271	104.51	No
1612	Registered_Pos01_Processed_Follicle_01.tif	16	134	226	201	153.929	127.271	103.103	No
1613	Registered_Pos01_Processed_Follicle_01.tif	16	135	224	199	153.929	127.271	100.274	No
1614	Registered_Pos01_Processed_Follicle_01.tif	16	136	224	198	153.929	127.271	99.5614	No
1615	Registered_Pos01_Processed_Follicle_01.tif	16	137	223	197	153.929	127.271	98.1472	No
1616	Registered_Pos01_Processed_Follicle_01.tif	16	138	221	195	153.929	127.271	95.3188	No
1617	Registered_Pos01_Processed_Follicle_01.tif	16	139	221	194	153.929	127.271	94.6109	No
1618	Registered_Pos01_Processed_Follicle_01.tif	16	140	221	194	153.929	127.271	94.6109	No
1619	Registered_Pos01_Processed_Follicle_01.tif	16	141	222	193	153.929	127.271	94.6251	No
1620	Registered_Pos01_Processed_Follicle_01.tif	16	142	222	193	153.929	127.271	94.6251	No
1621	Registered_Pos01_Processed_Follicle_01.tif	16	143	222	193	153.929	127.271	94.6251	No
1622	Registered_Pos01_Processed_Follicle_01.tif	16	144	222	193	153.929	127.271	94.6251	No
1623	Registered_Pos01_Processed_Follicle_01.tif	16	145	223	193	153.929	127.271	95.347	No
1624	Registered_Pos01_Processed_Follicle_01.tif	16	146	223	193	153.929	127.271	95.347	No
1625	Registered_Pos01_Processed_Follicle_01.tif	16	147	223	194	153.929	127.271	96.0391	No
1626	Registered_Pos01_Processed_Follicle_01.tif	16	148	223	194	153.929	127.271	96.0391	No
1627	Registered_Pos01_Processed_Follicle_01.tif	16	149	222	194	153.929	127.271	95.3224	No
1628	Registered_Pos01_Processed_Follicle_01.tif	16	150	222	194	153.929	127.271	95.3224	No
1629	Registered_Pos01_Processed_Follicle_01.tif	17	1	197	11	153.929	127.271	123.992	No
1630	Registered_Pos01_Processed_Follicle_01.tif	17	2	200	10	153.929	127.271	125.996	No
1631	Registered_Pos01_Processed_Follicle_01.tif	17	3	201	11	153.929	127.271	125.438	No
1632	Registered_Pos01_Processed_Follicle_01.tif	18	1	7	58	153.929	127.271	162.44	No
1633	Registered_Pos01_Processed_Follicle_01.tif	18	2	6	56	153.929	127.271	164.203	No
1634	Registered_Pos01_Processed_Follicle_01.tif	18	3	9	56	153.929	127.271	161.506	No
1635	Registered_Pos01_Processed_Follicle_01.tif	18	4	8	55	153.929	127.271	162.845	No
1636	Registered_Pos01_Processed_Follicle_01.tif	18	5	8	54	153.929	127.271	163.291	No
1637	Registered_Pos01_Processed_Follicle_01.tif	18	6	9	53	153.929	127.271	162.852	No
1638	Registered_Pos01_Processed_Follicle_01.tif	18	7	9	56	153.929	127.271	161.506	No
1639	Registered_Pos01_Processed_Follicle_01.tif	18	8	10	59	153.929	127.271	159.3	No
1640	Registered_Pos01_Processed_Follicle_01.tif	18	9	10	56	153.929	127.271	160.609	No
1641	Registered_Pos01_Processed_Follicle_01.tif	18	10	11	57	153.929	127.271	159.27	No
1642	Registered_Pos01_Processed_Follicle_01.tif	18	11	12	55	153.929	127.271	159.27	No
1643	Registered_Pos01_Processed_Follicle_01.tif	19	1	199	118	153.929	127.271	46.0146	Yes
1644	Registered_Pos01_Processed_Follicle_01.tif	19	2	199	120	153.929	127.271	45.6537	Yes
1645	Registered_Pos01_Processed_Follicle_01.tif	19	3	199	120	153.929	127.271	45.6537	Yes
1646	Registered_Pos01_Processed_Follicle_01.tif	19	4	197	120	153.929	127.271	43.6804	Yes
1647	Registered_Pos01_Processed_Follicle_01.tif	19	5	197	118	153.929	127.271	44.0574	Yes
1648	Registered_Pos01_Processed_Follicle_01.tif	19	6	198	119	153.929	127.271	44.8404	Yes
1649	Registered_Pos01_Processed_Follicle_01.tif	19	7	200	119	153.929	127.271	46.8075	Yes
1650	Registered_Pos01_Processed_Follicle_01.tif	19	8	200	118	153.929	127.271	46.9945	Yes
1651	Registered_Pos01_Processed_Follicle_01.tif	19	9	198	118	153.929	127.271	45.0355	Yes
1652	Registered_Pos01_Processed_Follicle_01.tif	19	10	198	117	153.929	127.271	45.252	Yes
1653	Registered_Pos01_Processed_Follicle_01.tif	19	11	196	114	153.929	127.271	44.1145	Yes
1654	Registered_Pos01_Processed_Follicle_01.tif	19	12	197	114	153.929	127.271	45.0692	Yes
1655	Registered_Pos01_Processed_Follicle_01.tif	19	13	197	114	153.929	127.271	45.0692	Yes
1656	Registered_Pos01_Processed_Follicle_01.tif	19	14	197	114	153.929	127.271	45.0692	Yes
1657	Registered_Pos01_Processed_Follicle_01.tif	19	15	197	112	153.929	127.271	45.6981	Yes
1658	Registered_Pos01_Processed_Follicle_01.tif	19	16	198	112	153.929	127.271	46.6418	Yes
1659	Registered_Pos01_Processed_Follicle_01.tif	19	17	198	112	153.929	127.271	46.6418	Yes
1660	Registered_Pos01_Processed_Follicle_01.tif	19	18	198	114	153.929	127.271	46.0258	Yes
1661	Registered_Pos01_Processed_Follicle_01.tif	19	19	198	113	153.929	127.271	46.324	Yes
1662	Registered_Pos01_Processed_Follicle_01.tif	19	20	198	113	153.929	127.271	46.324	Yes
1663	Registered_Pos01_Processed_Follicle_01.tif	19	21	196	113	153.929	127.271	44.4256	Yes
1664	Registered_Pos01_Processed_Follicle_01.tif	19	22	198	109	153.929	127.271	47.7083	Yes
1665	Registered_Pos01_Processed_Follicle_01.tif	19	23	197	111	153.929	127.271	46.0419	Yes
1666	Registered_Pos01_Processed_Follicle_01.tif	19	24	197	109	153.929	127.271	46.7861	Yes
1667	Registered_Pos01_Processed_Follicle_01.tif	19	25	196	109	153.929	127.271	45.8672	Yes
1668	Registered_Pos01_Processed_Follicle_01.tif	19	26	196	111	153.929	127.271	45.1078	Yes
1669	Registered_Pos01_Processed_Follicle_01.tif	19	27	195	110	153.929	127.271	44.5546	Yes
1670	Registered_Pos01_Processed_Follicle_01.tif	19	28	195	110	153.929	127.271	44.5546	Yes
1671	Registered_Pos01_Processed_Follicle_01.tif	19	29	196	107	153.929	127.271	46.7	Yes
1672	Registered_Pos01_Processed_Follicle_01.tif	19	30	193	107	153.929	127.271	44.0166	Yes
1673	Registered_Pos01_Processed_Follicle_01.tif	19	31	193	107	153.929	127.271	44.0166	Yes
1674	Registered_Pos01_Processed_Follicle_01.tif	19	32	192	107	153.929	127.271	43.1314	Yes
1675	Registered_Pos01_Processed_Follicle_01.tif	19	33	191	107	153.929	127.271	42.2514	Yes
1676	Registered_Pos01_Processed_Follicle_01.tif	19	34	186	106	153.929	127.271	38.4839	Yes
1677	Registered_Pos01_Processed_Follicle_01.tif	19	35	186	105	153.929	127.271	39.0455	Yes
1678	Registered_Pos01_Processed_Follicle_01.tif	19	36	188	107	153.929	127.271	39.6453	Yes
1679	Registered_Pos01_Processed_Follicle_01.tif	19	37	186	106	153.929	127.271	38.4839	Yes
1680	Registered_Pos01_Processed_Follicle_01.tif	19	38	187	106	153.929	127.271	39.3212	Yes
1681	Registered_Pos01_Processed_Follicle_01.tif	19	39	185	105	153.929	127.271	38.2284	Yes
1682	Registered_Pos01_Processed_Follicle_01.tif	19	40	185	105	153.929	127.271	38.2284	Yes
1683	Registered_Pos01_Processed_Follicle_01.tif	19	41	187	105	153.929	127.271	39.871	Yes
1684	Registered_Pos01_Processed_Follicle_01.tif	19	42	187	104	153.929	127.271	40.4381	Yes
1685	Registered_Pos01_Processed_Follicle_01.tif	19	43	188	104	153.929	127.271	41.2599	Yes
1686	Registered_Pos01_Processed_Follicle_01.tif	19	44	190	107	153.929	127.271	41.3768	Yes
1687	Registered_Pos01_Processed_Follicle_01.tif	19	45	190	107	153.929	127.271	41.3768	Yes
1688	Registered_Pos01_Processed_Follicle_01.tif	19	46	192	106	153.929	127.271	43.6103	Yes
1689	Registered_Pos01_Processed_Follicle_01.tif	19	47	193	106	153.929	127.271	44.486	Yes
1690	Registered_Pos01_Processed_Follicle_01.tif	19	48	194	107	153.929	127.271	44.9066	Yes
1691	Registered_Pos01_Processed_Follicle_01.tif	19	49	194	107	153.929	127.271	44.9066	Yes
1692	Registered_Pos01_Processed_Follicle_01.tif	19	50	193	105	153.929	127.271	44.9727	Yes
1693	Registered_Pos01_Processed_Follicle_01.tif	19	51	193	105	153.929	127.271	44.9727	Yes
1694	Registered_Pos01_Processed_Follicle_01.tif	19	52	190	106	153.929	127.271	41.8757	Yes
1695	Registered_Pos01_Processed_Follicle_01.tif	19	53	190	107	153.929	127.271	41.3768	Yes
1696	Registered_Pos01_Processed_Follicle_01.tif	19	54	193	111	153.929	127.271	42.3236	Yes
1697	Registered_Pos01_Processed_Follicle_01.tif	19	55	193	109	153.929	127.271	43.1321	Yes
1698	Registered_Pos01_Processed_Follicle_01.tif	19	56	190	107	153.929	127.271	41.3768	Yes
1699	Registered_Pos01_Processed_Follicle_01.tif	19	57	190	108	153.929	127.271	40.8961	Yes
1700	Registered_Pos01_Processed_Follicle_01.tif	19	58	188	109	153.929	127.271	38.6609	Yes
1701	Registered_Pos01_Processed_Follicle_01.tif	19	59	188	109	153.929	127.271	38.6609	Yes
1702	Registered_Pos01_Processed_Follicle_01.tif	19	60	188	111	153.929	127.271	37.7569	Yes
1703	Registered_Pos01_Processed_Follicle_01.tif	19	61	183	110	153.929	127.271	33.8144	Yes
1704	Registered_Pos01_Processed_Follicle_01.tif	19	62	187	110	153.929	127.271	37.3093	Yes
1705	Registered_Pos01_Processed_Follicle_01.tif	19	63	187	112	153.929	127.271	36.4266	Yes
1706	Registered_Pos01_Processed_Follicle_01.tif	19	64	187	112	153.929	127.271	36.4266	Yes
1707	Registered_Pos01_Processed_Follicle_01.tif	19	65	189	114	153.929	127.271	37.4979	Yes
1708	Registered_Pos01_Processed_Follicle_01.tif	19	66	187	115	153.929	127.271	35.2742	Yes
1709	Registered_Pos01_Processed_Follicle_01.tif	19	67	187	115	153.929	127.271	35.2742	Yes
1710	Registered_Pos01_Processed_Follicle_01.tif	19	68	188	121	153.929	127.271	34.6432	Yes
1711	Registered_Pos01_Processed_Follicle_01.tif	19	69	187	123	153.929	127.271	33.3456	Yes
1712	Registered_Pos01_Processed_Follicle_01.tif	19	70	190	121	153.929	127.271	36.612	Yes
1713	Registered_Pos01_Processed_Follicle_01.tif	19	71	190	123	153.929	127.271	36.3229	Yes
1714	Registered_Pos01_Processed_Follicle_01.tif	19	72	191	127	153.929	127.271	37.0719	Yes
1715	Registered_Pos01_Processed_Follicle_01.tif	19	73	191	124	153.929	127.271	37.2149	Yes
1716	Registered_Pos01_Processed_Follicle_01.tif	19	74	192	125	153.929	127.271	38.1386	Yes
1717	Registered_Pos01_Processed_Follicle_01.tif	19	75	190	123	153.929	127.271	36.3229	Yes
1718	Registered_Pos01_Processed_Follicle_01.tif	19	76	190	120	153.929	127.271	36.7965	Yes
1719	Registered_Pos01_Processed_Follicle_01.tif	19	77	190	118	153.929	127.271	37.2433	Yes
1720	Registered_Pos01_Processed_Follicle_01.tif	19	78	190	115	153.929	127.271	38.1011	Yes
1721	Registered_Pos01_Processed_Follicle_01.tif	19	79	189	116	153.929	127.271	36.8376	Yes
1722	Registered_Pos01_Processed_Follicle_01.tif	19	80	188	119	153.929	127.271	35.0605	Yes
1723	Registered_Pos01_Processed_Follicle_01.tif	19	81	193	120	153.929	127.271	39.7417	Yes
1724	Registered_Pos01_Processed_Follicle_01.tif	19	82	201	120	153.929	127.271	47.6292	Yes
1725	Registered_Pos01_Processed_Follicle_01.tif	19	83	202	122	153.929	127.271	48.359	Yes
1726	Registered_Pos01_Processed_Follicle_01.tif	19	84	202	125	153.929	127.271	48.1245	Yes
1727	Registered_Pos01_Processed_Follicle_01.tif	19	85	203	125	153.929	127.271	49.1234	Yes
1728	Registered_Pos01_Processed_Follicle_01.tif	19	86	204	126	153.929	127.271	50.087	Yes
1729	Registered_Pos01_Processed_Follicle_01.tif	19	87	204	127	153.929	127.271	50.0716	Yes
1730	Registered_Pos01_Processed_Follicle_01.tif	19	88	203	124	153.929	127.271	49.1798	Yes
1731	Registered_Pos01_Processed_Follicle_01.tif	19	89	203	122	153.929	127.271	49.3532	Yes
1732	Registered_Pos01_Processed_Follicle_01.tif	19	90	202	122	153.929	127.271	48.359	Yes
1733	Registered_Pos01_Processed_Follicle_01.tif	19	91	202	119	153.929	127.271	48.7773	Yes
1734	Registered_Pos01_Processed_Follicle_01.tif	19	92	202	117	153.929	127.271	49.156	Yes
1735	Registered_Pos01_Processed_Follicle_01.tif	19	93	204	119	153.929	127.271	50.7495	Yes
1736	Registered_Pos01_Processed_Follicle_01.tif	19	94	203	119	153.929	127.271	49.7631	Yes
1737	Registered_Pos01_Processed_Follicle_01.tif	19	95	204	121	153.929	127.271	50.4621	Yes
1738	Registered_Pos01_Processed_Follicle_01.tif	19	96	205	125	153.929	127.271	51.1214	Yes
1739	Registered_Pos01_Processed_Follicle_01.tif	19	97	204	121	153.929	127.271	50.4621	Yes
1740	Registered_Pos01_Processed_Follicle_01.tif	19	98	204	125	153.929	127.271	50.1224	Yes
1741	Registered_Pos01_Processed_Follicle_01.tif	19	99	205	121	153.929	127.271	51.4545	Yes
1742	Registered_Pos01_Processed_Follicle_01.tif	19	100	204	124	153.929	127.271	50.1776	Yes
1743	Registered_Pos01_Processed_Follicle_01.tif	19	101	204	124	153.929	127.271	50.1776	Yes
1744	Registered_Pos01_Processed_Follicle_01.tif	19	102	203	121	153.929	127.271	49.47	Yes
1745	Registered_Pos01_Processed_Follicle_01.tif	19	103	205	122	153.929	127.271	51.3422	Yes
1746	Registered_Pos01_Processed_Follicle_01.tif	19	104	205	122	153.929	127.271	51.3422	Yes
1747	Registered_Pos01_Processed_Follicle_01.tif	19	105	206	121	153.929	127.271	52.4472	Yes
1748	Registered_Pos01_Processed_Follicle_01.tif	19	106	206	120	153.929	127.271	52.5761	Yes
1749	Registered_Pos01_Processed_Follicle_01.tif	19	107	206	119	153.929	127.271	52.7237	Yes
1750	Registered_Pos01_Processed_Follicle_01.tif	19	108	203	117	153.929	127.271	50.1343	Yes
1751	Registered_Pos01_Processed_Follicle_01.tif	19	109	203	122	153.929	127.271	49.3532	Yes
1752	Registered_Pos01_Processed_Follicle_01.tif	19	110	204	123	153.929	127.271	50.2527	Yes
1753	Registered_Pos01_Processed_Follicle_01.tif	19	111	204	125	153.929	127.271	50.1224	Yes
1754	Registered_Pos01_Processed_Follicle_01.tif	19	112	203	123	153.929	127.271	49.2564	Yes
1755	Registered_Pos01_Processed_Follicle_01.tif	19	113	205	124	153.929	127.271	51.1755	Yes
1756	Registered_Pos01_Processed_Follicle_01.tif	19	114	210	124	153.929	127.271	56.1662	Yes
1757	Registered_Pos01_Processed_Follicle_01.tif	19	115	211	125	153.929	127.271	57.1161	No
1758	Registered_Pos01_Processed_Follicle_01.tif	19	116	212	126	153.929	127.271	58.0848	No
1759	Registered_Pos01_Processed_Follicle_01.tif	19	117	212	126	153.929	127.271	58.0848	No
1760	Registered_Pos01_Processed_Follicle_01.tif	19	118	210	126	153.929	127.271	56.0853	Yes
1761	Registered_Pos01_Processed_Follicle_01.tif	19	119	209	126	153.929	127.271	55.0856	Yes
1762	Registered_Pos01_Processed_Follicle_01.tif	19	120	208	126	153.929	127.271	54.0858	Yes
1763	Registered_Pos01_Processed_Follicle_01.tif	19	121	207	127	153.929	127.271	53.0716	Yes
1764	Registered_Pos01_Processed_Follicle_01.tif	19	122	204	131	153.929	127.271	50.2095	Yes
1765	Registered_Pos01_Processed_Follicle_01.tif	19	123	204	132	153.929	127.271	50.2937	Yes
1766	Registered_Pos01_Processed_Follicle_01.tif	19	124	203	132	153.929	127.271	49.2982	Yes
1767	Registered_Pos01_Processed_Follicle_01.tif	19	125	202	133	153.929	127.271	48.411	Yes
1768	Registered_Pos01_Processed_Follicle_01.tif	19	126	202	135	153.929	127.271	48.6882	Yes
1769	Registered_Pos01_Processed_Follicle_01.tif	19	127	200	130	153.929	127.271	46.1516	Yes
1770	Registered_Pos01_Processed_Follicle_01.tif	19	128	199	127	153.929	127.271	45.0717	Yes
1771	Registered_Pos01_Processed_Follicle_01.tif	19	129	199	127	153.929	127.271	45.0717	Yes
1772	Registered_Pos01_Processed_Follicle_01.tif	19	130	199	128	153.929	127.271	45.0768	Yes
1773	Registered_Pos01_Processed_Follicle_01.tif	19	131	199	128	153.929	127.271	45.0768	Yes
1774	Registered_Pos01_Processed_Follicle_01.tif	19	132	195	124	153.929	127.271	41.201	Yes
1775	Registered_Pos01_Processed_Follicle_01.tif	19	133	193	118	153.929	127.271	40.1558	Yes
1776	Registered_Pos01_Processed_Follicle_01.tif	19	134	193	124	153.929	127.271	39.2076	Yes
1777	Registered_Pos01_Processed_Follicle_01.tif	19	135	193	126	153.929	127.271	39.0916	Yes
1778	Registered_Pos01_Processed_Follicle_01.tif	19	136	196	127	153.929	127.271	42.0718	Yes
1779	Registered_Pos01_Processed_Follicle_01.tif	19	137	196	124	153.929	127.271	42.1979	Yes
1780	Registered_Pos01_Processed_Follicle_01.tif	19	138	196	123	153.929	127.271	42.2872	Yes
1781	Registered_Pos01_Processed_Follicle_01.tif	19	139	193	123	153.929	127.271	39.3037	Yes
1782	Registered_Pos01_Processed_Follicle_01.tif	19	140	196	126	153.929	127.271	42.0901	Yes
1783	Registered_Pos01_Processed_Follicle_01.tif	19	141	198	127	153.929	127.271	44.0717	Yes
1784	Registered_Pos01_Processed_Follicle_01.tif	19	142	198	127	153.929	127.271	44.0717	Yes
1785	Registered_Pos01_Processed_Follicle_01.tif	19	143	198	127	153.929	127.271	44.0717	Yes
1786	Registered_Pos01_Processed_Follicle_01.tif	19	144	197	129	153.929	127.271	43.1056	Yes
1787	Registered_Pos01_Processed_Follicle_01.tif	19	145	195	129	153.929	127.271	41.1072	Yes
1788	Registered_Pos01_Processed_Follicle_01.tif	19	146	194	128	153.929	127.271	40.0775	Yes
1789	Registered_Pos01_Processed_Follicle_01.tif	19	147	198	127	153.929	127.271	44.0717	Yes
1790	Registered_Pos01_Processed_Follicle_01.tif	19	148	200	125	153.929	127.271	46.1268	Yes
1791	Registered_Pos01_Processed_Follicle_01.tif	19	149	199	125	153.929	127.271	45.1281	Yes
1792	Registered_Pos01_Processed_Follicle_01.tif	19	150	201	128	153.929	127.271	47.0765	Yes
1793	Registered_Pos01_Processed_Follicle_01.tif	19	150	198	128	153.929	127.271	44.0769	Yes
1794	Registered_Pos01_Processed_Follicle_01.tif	19	150	198	128	153.929	127.271	44.0769	Yes
1795	Registered_Pos01_Processed_Follicle_01.tif	20	1	236	215	153.929	127.271	120.133	No
1796	Registered_Pos01_Processed_Follicle_01.tif	20	2	235	212	153.929	127.271	117.266	No
1797	Registered_Pos01_Processed_Follicle_01.tif	20	3	235	212	153.929	127.271	117.266	No
1798	Registered_Pos01_Processed_Follicle_01.tif	20	4	236	215	153.929	127.271	120.133	No
1799	Registered_Pos01_Processed_Follicle_01.tif	20	5	237	215	153.929	127.271	120.818	No
1800	Registered_Pos01_Processed_Follicle_01.tif	20	6	237	220	153.929	127.271	124.496	No
1801	Registered_Pos01_Processed_Follicle_01.tif	20	7	236	221	153.929	127.271	124.582	No
1802	Registered_Pos01_Processed_Follicle_01.tif	20	8	237	220	153.929	127.271	124.496	No
1803	Registered_Pos01_Processed_Follicle_01.tif	20	9	237	220	153.929	127.271	124.496	No
1804	Registered_Pos01_Processed_Follicle_01.tif	20	10	235	219	153.929	127.271	122.42	No
1805	Registered_Pos01_Processed_Follicle_01.tif	20	11	235	219	153.929	127.271	122.42	No
1806	Registered_Pos01_Processed_Follicle_01.tif	20	12	234	219	153.929	127.271	121.76	No
1807	Registered_Pos01_Processed_Follicle_01.tif	20	13	235	220	153.929	127.271	123.171	No
1808	Registered_Pos01_Processed_Follicle_01.tif	20	14	235	220	153.929	127.271	123.171	No
1809	Registered_Pos01_Processed_Follicle_01.tif	20	15	235	220	153.929	127.271	123.171	No
1810	Registered_Pos01_Processed_Follicle_01.tif	20	16	235	218	153.929	127.271	121.672	No
1811	Registered_Pos01_Processed_Follicle_01.tif	20	17	234	215	153.929	127.271	118.776	No
1812	Registered_Pos01_Processed_Follicle_01.tif	20	18	233	218	153.929	127.271	120.349	No
1813	Registered_Pos01_Processed_Follicle_01.tif	20	19	233	218	153.929	127.271	120.349	No
1814	Registered_Pos01_Processed_Follicle_01.tif	20	20	232	218	153.929	127.271	119.694	No
1815	Registered_Pos01_Processed_Follicle_01.tif	20	21	231	218	153.929	127.271	119.045	No
1816	Registered_Pos01_Processed_Follicle_01.tif	20	22	228	217	153.929	127.271	116.352	No
1817	Registered_Pos01_Processed_Follicle_01.tif	20	23	229	217	153.929	127.271	116.991	No
1818	Registered_Pos01_Processed_Follicle_01.tif	20	24	229	218	153.929	127.271	117.76	No
1819	Registered_Pos01_Processed_Follicle_01.tif	20	25	229	218	153.929	127.271	117.76	No
1820	Registered_Pos01_Processed_Follicle_01.tif	20	26	229	216	153.929	127.271	116.226	No
1821	Registered_Pos01_Processed_Follicle_01.tif	20	27	228	216	153.929	127.271	115.582	No
1822	Registered_Pos01_Processed_Follicle_01.tif	20	28	227	216	153.929	127.271	114.944	No
1823	Registered_Pos01_Processed_Follicle_01.tif	20	29	215	213	153.929	127.271	105.257	No
1824	Registered_Pos01_Processed_Follicle_01.tif	20	30	212	210	153.929	127.271	101.076	No
1825	Registered_Pos01_Processed_Follicle_01.tif	20	31	212	210	153.929	127.271	101.076	No
1826	Registered_Pos01_Processed_Follicle_01.tif	20	32	212	210	153.929	127.271	101.076	No
1827	Registered_Pos01_Processed_Follicle_01.tif	20	33	214	210	153.929	127.271	102.238	No
1828	Registered_Pos01_Processed_Follicle_01.tif	20	34	215	212	153.929	127.271	104.444	No
1829	Registered_Pos01_Processed_Follicle_01.tif	20	35	213	211	153.929	127.271	102.469	No
1830	Registered_Pos01_Processed_Follicle_01.tif	20	36	213	210	153.929	127.271	101.653	No
1831	Registered_Pos01_Processed_Follicle_01.tif	20	37	213	212	153.929	127.271	103.287	No
1832	Registered_Pos01_Processed_Follicle_01.tif	20	38	214	211	153.929	127.271	103.049	No
1833	Registered_Pos01_Processed_Follicle_01.tif	20	39	213	211	153.929	127.271	102.469	No
1834	Registered_Pos01_Processed_Follicle_01.tif	20	40	212	210	153.929	127.271	101.076	No
1835	Registered_Pos01_Processed_Follicle_01.tif	20	41	212	209	153.929	127.271	100.259	No
1836	Registered_Pos01_Processed_Follicle_01.tif	20	42	212	209	153.929	127.271	100.259	No
1837	Registered_Pos01_Processed_Follicle_01.tif	20	43	208	212	153.929	127.271	100.512	No
1838	Registered_Pos01_Processed_Follicle_01.tif	20	44	208	210	153.929	127.271	98.8316	No
1839	Registered_Pos01_Processed_Follicle_01.tif	20	45	209	211	153.929	127.271	100.216	No
1840	Registered_Pos01_Processed_Follicle_01.tif	20	46	211	211	153.929	127.271	101.329	No
1841	Registered_Pos01_Processed_Follicle_01.tif	20	47	215	209	153.929	127.271	102.026	No
1842	Registered_Pos01_Processed_Follicle_01.tif	20	48	215	207	153.929	127.271	100.431	No
1843	Registered_Pos01_Processed_Follicle_01.tif	20	49	215	205	153.929	127.271	98.8504	No
1844	Registered_Pos01_Processed_Follicle_01.tif	20	50	215	204	153.929	127.271	98.066	No
1845	Registered_Pos01_Processed_Follicle_01.tif	20	51	216	202	153.929	127.271	97.1451	No
1846	Registered_Pos01_Processed_Follicle_01.tif	20	52	217	207	153.929	127.271	101.659	No
1847	Registered_Pos01_Processed_Follicle_01.tif	20	53	215	206	153.929	127.271	99.6386	No
1848	Registered_Pos01_Processed_Follicle_01.tif	20	54	216	208	153.929	127.271	101.833	No
1849	Registered_Pos01_Processed_Follicle_01.tif	20	55	216	209	153.929	127.271	102.627	No
1850	Registered_Pos01_Processed_Follicle_01.tif	20	56	218	208	153.929	127.271	103.064	No
1851	Registered_Pos01_Processed_Follicle_01.tif	20	57	217	208	153.929	127.271	102.445	No
1852	Registered_Pos01_Processed_Follicle_01.tif	20	58	215	205	153.929	127.271	98.8504	No
1853	Registered_Pos01_Processed_Follicle_01.tif	20	59	215	205	153.929	127.271	98.8504	No
1854	Registered_Pos01_Processed_Follicle_01.tif	20	60	215	210	153.929	127.271	102.828	No
1855	Registered_Pos01_Processed_Follicle_01.tif	20	61	212	209	153.929	127.271	100.259	No
1856	Registered_Pos01_Processed_Follicle_01.tif	20	62	214	211	153.929	127.271	103.049	No
1857	Registered_Pos01_Processed_Follicle_01.tif	20	63	211	210	153.929	127.271	100.504	No
1858	Registered_Pos01_Processed_Follicle_01.tif	20	64	213	210	153.929	127.271	101.653	No
1859	Registered_Pos01_Processed_Follicle_01.tif	20	65	211	210	153.929	127.271	100.504	No
1860	Registered_Pos01_Processed_Follicle_01.tif	20	66	214	210	153.929	127.271	102.238	No
1861	Registered_Pos01_Processed_Follicle_01.tif	20	67	215	209	153.929	127.271	102.026	No
1862	Registered_Pos01_Processed_Follicle_01.tif	20	68	211	211	153.929	127.271	101.329	No
1863	Registered_Pos01_Processed_Follicle_01.tif	20	69	214	211	153.929	127.271	103.049	No
1864	Registered_Pos01_Processed_Follicle_01.tif	20	70	211	208	153.929	127.271	98.8646	No
1865	Registered_Pos01_Processed_Follicle_01.tif	20	71	212	209	153.929	127.271	100.259	No
1866	Registered_Pos01_Processed_Follicle_01.tif	20	72	207	208	153.929	127.271	96.6107	No
1867	Registered_Pos01_Processed_Follicle_01.tif	20	73	207	207	153.929	127.271	95.7767	No
1868	Registered_Pos01_Processed_Follicle_01.tif	20	74	208	205	153.929	127.271	94.6858	No
1869	Registered_Pos01_Processed_Follicle_01.tif	20	75	212	205	153.929	127.271	97.0256	No
1870	Registered_Pos01_Processed_Follicle_01.tif	20	76	211	207	153.929	127.271	98.0497	No
1871	Registered_Pos01_Processed_Follicle_01.tif	20	77	208	204	153.929	127.271	93.8666	No
1872	Registered_Pos01_Processed_Follicle_01.tif	20	78	205	209	153.929	127.271	96.3733	No
1873	Registered_Pos01_Processed_Follicle_01.tif	20	79	212	211	153.929	127.271	101.896	No
1874	Registered_Pos01_Processed_Follicle_01.tif	20	80	212	210	153.929	127.271	101.076	No
1875	Registered_Pos01_Processed_Follicle_01.tif	20	81	209	210	153.929	127.271	99.3823	No
1876	Registered_Pos01_Processed_Follicle_01.tif	20	82	209	210	153.929	127.271	99.3823	No
1877	Registered_Pos01_Processed_Follicle_01.tif	20	83	207	210	153.929	127.271	98.2881	No
1878	Registered_Pos01_Processed_Follicle_01.tif	20	84	207	210	153.929	127.271	98.2881	No
1879	Registered_Pos01_Processed_Follicle_01.tif	20	85	206	208	153.929	127.271	96.065	No
1880	Registered_Pos01_Processed_Follicle_01.tif	20	86	201	207	153.929	127.271	92.5869	No
1881	Registered_Pos01_Processed_Follicle_01.tif	20	87	201	203	153.929	127.271	89.1656	No
1882	Registered_Pos01_Processed_Follicle_01.tif	20	88	196	202	153.929	127.271	85.7574	No
1883	Registered_Pos01_Processed_Follicle_01.tif	20	89	190	207	153.929	127.271	87.5087	No
1884	Registered_Pos01_Processed_Follicle_01.tif	20	90	193	201	153.929	127.271	83.4413	No
1885	Registered_Pos01_Processed_Follicle_01.tif	20	91	193	202	153.929	127.271	84.3262	No
1886	Registered_Pos01_Processed_Follicle_01.tif	20	92	192	201	153.929	127.271	82.9778	No
1887	Registered_Pos01_Processed_Follicle_01.tif	20	93	194	204	153.929	127.271	86.5619	No
1888	Registered_Pos01_Processed_Follicle_01.tif	20	94	195	204	153.929	127.271	87.0293	No
1889	Registered_Pos01_Processed_Follicle_01.tif	20	95	194	204	153.929	127.271	86.5619	No
1890	Registered_Pos01_Processed_Follicle_01.tif	20	96	194	204	153.929	127.271	86.5619	No
1891	Registered_Pos01_Processed_Follicle_01.tif	20	97	192	204	153.929	127.271	85.6544	No
1892	Registered_Pos01_Processed_Follicle_01.tif	20	98	192	204	153.929	127.271	85.6544	No
1893	Registered_Pos01_Processed_Follicle_01.tif	20	99	191	203	153.929	127.271	84.3154	No
1894	Registered_Pos01_Processed_Follicle_01.tif	20	100	192	204	153.929	127.271	85.6544	No
1895	Registered_Pos01_Processed_Follicle_01.tif	20	101	192	204	153.929	127.271	85.6544	No
1896	Registered_Pos01_Processed_Follicle_01.tif	20	102	191	204	153.929	127.271	85.2147	No
1897	Registered_Pos01_Processed_Follicle_01.tif	20	103	191	204	153.929	127.271	85.2147	No
1898	Registered_Pos01_Processed_Follicle_01.tif	20	104	191	205	153.929	127.271	86.1162	No
1899	Registered_Pos01_Processed_Follicle_01.tif	20	105	190	205	153.929	127.271	85.6904	No
1900	Registered_Pos01_Processed_Follicle_01.tif	20	106	192	206	153.929	127.271	87.4505	No
1901	Registered_Pos01_Processed_Follicle_01.tif	20	107	192	204	153.929	127.271	85.6544	No
1902	Registered_Pos01_Processed_Follicle_01.tif	20	108	190	208	153.929	127.271	88.4207	No
1903	Registered_Pos01_Processed_Follicle_01.tif	20	109	190	204	153.929	127.271	84.7844	No
1904	Registered_Pos01_Processed_Follicle_01.tif	20	110	189	204	153.929	127.271	84.3638	No
1905	Registered_Pos01_Processed_Follicle_01.tif	20	111	190	204	153.929	127.271	84.7844	No
1906	Registered_Pos01_Processed_Follicle_01.tif	20	112	192	204	153.929	127.271	85.6544	No
1907	Registered_Pos01_Processed_Follicle_01.tif	20	113	192	204	153.929	127.271	85.6544	No
1908	Registered_Pos01_Processed_Follicle_01.tif	20	114	192	203	153.929	127.271	84.7598	No
1909	Registered_Pos01_Processed_Follicle_01.tif	20	115	191	203	153.929	127.271	84.3154	No
1910	Registered_Pos01_Processed_Follicle_01.tif	20	116	190	204	153.929	127.271	84.7844	No
1911	Registered_Pos01_Processed_Follicle_01.tif	20	117	193	203	153.929	127.271	85.2136	No
1912	Registered_Pos01_Processed_Follicle_01.tif	20	118	193	201	153.929	127.271	83.4413	No
1913	Registered_Pos01_Processed_Follicle_01.tif	20	119	194	203	153.929	127.271	85.6767	No
1914	Registered_Pos01_Processed_Follicle_01.tif	20	120	193	203	153.929	127.271	85.2136	No
1915	Registered_Pos01_Processed_Follicle_01.tif	20	121	193	203	153.929	127.271	85.2136	No
1916	Registered_Pos01_Processed_Follicle_01.tif	20	122	193	203	153.929	127.271	85.2136	No
1917	Registered_Pos01_Processed_Follicle_01.tif	20	123	193	203	153.929	127.271	85.2136	No
1918	Registered_Pos01_Processed_Follicle_01.tif	20	124	193	203	153.929	127.271	85.2136	No
1919	Registered_Pos01_Processed_Follicle_01.tif	20	125	193	203	153.929	127.271	85.2136	No
1920	Registered_Pos01_Processed_Follicle_01.tif	20	126	193	203	153.929	127.271	85.2136	No
1921	Registered_Pos01_Processed_Follicle_01.tif	20	127	193	203	153.929	127.271	85.2136	No
1922	Registered_Pos01_Processed_Follicle_01.tif	20	128	193	202	153.929	127.271	84.3262	No
1923	Registered_Pos01_Processed_Follicle_01.tif	20	129	193	202	153.929	127.271	84.3262	No
1924	Registered_Pos01_Processed_Follicle_01.tif	20	130	193	202	153.929	127.271	84.3262	No
1925	Registered_Pos01_Processed_Follicle_01.tif	20	131	194	201	153.929	127.271	83.9142	No
1926	Registered_Pos01_Processed_Follicle_01.tif	20	132	193	201	153.929	127.271	83.4413	No
1927	Registered_Pos01_Processed_Follicle_01.tif	20	133	193	201	153.929	127.271	83.4413	No
1928	Registered_Pos01_Processed_Follicle_01.tif	20	134	194	199	153.929	127.271	82.1625	No
1929	Registered_Pos01_Processed_Follicle_01.tif	20	135	195	199	153.929	127.271	82.6548	No
1930	Registered_Pos01_Processed_Follicle_01.tif	20	136	195	200	153.929	127.271	83.5241	No
1931	Registered_Pos01_Processed_Follicle_01.tif	20	137	195	200	153.929	127.271	83.5241	No
1932	Registered_Pos01_Processed_Follicle_01.tif	20	138	195	200	153.929	127.271	83.5241	No
1933	Registered_Pos01_Processed_Follicle_01.tif	20	139	194	200	153.929	127.271	83.0369	No
1934	Registered_Pos01_Processed_Follicle_01.tif	20	140	194	200	153.929	127.271	83.0369	No
1935	Registered_Pos01_Processed_Follicle_01.tif	20	141	193	200	153.929	127.271	82.559	No
1936	Registered_Pos01_Processed_Follicle_01.tif	20	142	193	200	153.929	127.271	82.559	No
1937	Registered_Pos01_Processed_Follicle_01.tif	20	143	193	199	153.929	127.271	81.6795	No
1938	Registered_Pos01_Processed_Follicle_01.tif	20	144	193	199	153.929	127.271	81.6795	No
1939	Registered_Pos01_Processed_Follicle_01.tif	20	145	193	199	153.929	127.271	81.6795	No
1940	Registered_Pos01_Processed_Follicle_01.tif	20	146	193	200	153.929	127.271	82.559	No
1941	Registered_Pos01_Processed_Follicle_01.tif	20	147	193	200	153.929	127.271	82.559	No
1942	Registered_Pos01_Processed_Follicle_01.tif	20	148	193	201	153.929	127.271	83.4413	No
1943	Registered_Pos01_Processed_Follicle_01.tif	20	149	193	202	153.929	127.271	84.3262	No
1944	Registered_Pos01_Processed_Follicle_01.tif	20	150	196	202	153.929	127.271	85.7574	No
1945	Registered_Pos01_Processed_Follicle_01.tif	21	1	29	84	153.929	127.271	132.211	No
1946	Registered_Pos01_Processed_Follicle_01.tif	21	2	32	80	153.929	127.271	130.772	No
1947	Registered_Pos01_Processed_Follicle_01.tif	21	3	33	80	153.929	127.271	129.84	No
1948	Registered_Pos01_Processed_Follicle_01.tif	21	4	38	82	153.929	127.271	124.455	No
1949	Registered_Pos01_Processed_Follicle_01.tif	21	5	36	83	153.929	127.271	125.965	No
1950	Registered_Pos01_Processed_Follicle_01.tif	21	6	32	78	153.929	127.271	131.508	No
1951	Registered_Pos01_Processed_Follicle_01.tif	21	7	32	78	153.929	127.271	131.508	No
1952	Registered_Pos01_Processed_Follicle_01.tif	21	8	32	78	153.929	127.271	131.508	No
1953	Registered_Pos01_Processed_Follicle_01.tif	21	9	31	76	153.929	127.271	133.193	No
1954	Registered_Pos01_Processed_Follicle_01.tif	21	10	33	81	153.929	127.271	129.479	No
1955	Registered_Pos01_Processed_Follicle_01.tif	21	11	33	82	153.929	127.271	129.125	No
1956	Registered_Pos01_Processed_Follicle_01.tif	21	12	31	79	153.929	127.271	132.067	No
1957	Registered_Pos01_Processed_Follicle_01.tif	21	13	30	77	153.929	127.271	133.737	No
1958	Registered_Pos01_Processed_Follicle_01.tif	21	14	29	78	153.929	127.271	134.294	No
1959	Registered_Pos01_Processed_Follicle_01.tif	21	15	24	81	153.929	127.271	137.923	No
1960	Registered_Pos01_Processed_Follicle_01.tif	21	16	32	79	153.929	127.271	131.137	No
1961	Registered_Pos01_Processed_Follicle_01.tif	21	17	35	77	153.929	127.271	129.118	No
1962	Registered_Pos01_Processed_Follicle_01.tif	21	18	35	74	153.929	127.271	130.315	No
1963	Registered_Pos01_Processed_Follicle_01.tif	21	19	32	67	153.929	127.271	136.012	No
1964	Registered_Pos01_Processed_Follicle_01.tif	21	20	32	66	153.929	127.271	136.458	No
1965	Registered_Pos01_Processed_Follicle_01.tif	21	21	31	58	153.929	127.271	141.103	No
1966	Registered_Pos01_Processed_Follicle_01.tif	21	22	28	50	153.929	127.271	147.746	No
1967	Registered_Pos01_Processed_Follicle_01.tif	21	23	32	49	153.929	127.271	144.89	No
1968	Registered_Pos01_Processed_Follicle_01.tif	21	24	33	48	153.929	127.271	144.595	No
1969	Registered_Pos01_Processed_Follicle_01.tif	21	25	32	46	153.929	127.271	146.532	No
1970	Registered_Pos01_Processed_Follicle_01.tif	21	26	32	46	153.929	127.271	146.532	No
1971	Registered_Pos01_Processed_Follicle_01.tif	21	27	32	50	153.929	127.271	144.352	No
1972	Registered_Pos01_Processed_Follicle_01.tif	21	28	32	50	153.929	127.271	144.352	No
1973	Registered_Pos01_Processed_Follicle_01.tif	21	29	32	50	153.929	127.271	144.352	No
1974	Registered_Pos01_Processed_Follicle_01.tif	21	30	32	50	153.929	127.271	144.352	No
1975	Registered_Pos01_Processed_Follicle_01.tif	21	31	32	50	153.929	127.271	144.352	No
1976	Registered_Pos01_Processed_Follicle_01.tif	21	32	32	50	153.929	127.271	144.352	No
1977	Registered_Pos01_Processed_Follicle_01.tif	21	33	32	50	153.929	127.271	144.352	No
1978	Registered_Pos01_Processed_Follicle_01.tif	21	34	32	50	153.929	127.271	144.352	No
1979	Registered_Pos01_Processed_Follicle_01.tif	21	35	38	54	153.929	127.271	137.143	No
1980	Registered_Pos01_Processed_Follicle_01.tif	21	36	40	53	153.929	127.271	136	No
1981	Registered_Pos01_Processed_Follicle_01.tif	21	37	38	53	153.929	127.271	137.68	No
1982	Registered_Pos01_Processed_Follicle_01.tif	21	38	38	53	153.929	127.271	137.68	No
1983	Registered_Pos01_Processed_Follicle_01.tif	21	39	34	51	153.929	127.271	142.128	No
1984	Registered_Pos01_Processed_Follicle_01.tif	21	40	35	51	153.929	127.271	141.285	No
1985	Registered_Pos01_Processed_Follicle_01.tif	21	41	35	51	153.929	127.271	141.285	No
1986	Registered_Pos01_Processed_Follicle_01.tif	21	42	35	52	153.929	127.271	140.748	No
1987	Registered_Pos01_Processed_Follicle_01.tif	21	43	32	50	153.929	127.271	144.352	No
1988	Registered_Pos01_Processed_Follicle_01.tif	21	44	32	51	153.929	127.271	143.819	No
1989	Registered_Pos01_Processed_Follicle_01.tif	21	45	32	53	153.929	127.271	142.769	No
1990	Registered_Pos01_Processed_Follicle_01.tif	21	46	33	53	153.929	127.271	141.916	No
1991	Registered_Pos01_Processed_Follicle_01.tif	21	47	34	52	153.929	127.271	141.594	No
1992	Registered_Pos01_Processed_Follicle_01.tif	21	48	35	52	153.929	127.271	140.748	No
1993	Registered_Pos01_Processed_Follicle_01.tif	21	49	34	51	153.929	127.271	142.128	No
1994	Registered_Pos01_Processed_Follicle_01.tif	21	50	34	50	153.929	127.271	142.667	No
1995	Registered_Pos01_Processed_Follicle_01.tif	21	51	32	50	153.929	127.271	144.352	No
1996	Registered_Pos01_Processed_Follicle_01.tif	21	52	33	51	153.929	127.271	142.973	No
1997	Registered_Pos01_Processed_Follicle_01.tif	21	53	33	51	153.929	127.271	142.973	No
1998	Registered_Pos01_Processed_Follicle_01.tif	21	54	32	50	153.929	127.271	144.352	No
1999	Registered_Pos01_Processed_Follicle_01.tif	21	55	32	50	153.929	127.271	144.352	No
2000	Registered_Pos01_Processed_Follicle_01.tif	21	56	32	50	153.929	127.271	144.352	No
2001	Registered_Pos01_Processed_Follicle_01.tif	21	57	32	50	153.929	127.271	144.352	No
2002	Registered_Pos01_Processed_Follicle_01.tif	21	58	32	50	153.929	127.271	144.352	No
[truncated: 45,842 more rows]

## Sheet: Fig 2B Control probability
t-24hrs distance from COM								Combined data			Distance from centre of condensate (µm)	Score	%
Intercondesate	Score		Condensate	Score				Distance	Score		0-20	1	100
93.75	0		41.3752	1				6.9345	1		20-40	0.833333	83.3333
133.925	0		32.1838	1				19.9537	1		40-60	0.730769	73.0769
80.251	0		89.2778	1				21.6852	0		60-80	0.25	25
103.213	0		46.8075	1				22.9885	1		80-100	0.14	14
138.383	0		46.6336	1				23.8387	1		100-120	0.104167	10.4167
119.929	0		35.6986	1				26.2914	1		120-140	0.0526316	5.26316
139.44	0		26.2914	1				28.2714	1		140-160	0	0
124.582	0		52.6062	1				28.338	1		160-180	0	0
75.0714	0		52.1686	1				29.7675	1		180-200	0	0
117.281	0		73.6019	1				30.9948	1
116.614	0		43.7886	1				32.1838	1
123.204	0		58.1178	1				33.6683	1
84.4905	0		62.2315	1				35.6986	1
85.8337	0		78.768	1				37.6497	0
128.942	0		53.0854	1				40.8868	1
144.01	0		63.6577	1				41.3752	1
111.413	0		28.338	1				42.9688	1
112.689	0		58.5182	1				43.7886	1
101.867	0		29.7675	1				44.6029	1
87.8401	0		69.911	1				46.6336	1
105.383	0		53.0215	1				46.8075	1
140.634	0		42.9688	1				48.1279	1
136.715	0		87.8955	1				48.2962	1
138.079	0		51.9114	1				49.8099	0
130.729	0		6.9345	1				50.4255	1
96.0168	0		48.1279	1				50.5662	1
91.2909	0		117.35	1				50.579	0
94.7716	0		110.011	1				51.6383	1
72.1386	0		108.703	1				51.9114	1
117.831	0		99.0323	1				52.1664	0
149.431	0		83.735	1				52.1686	1
126.653	0		50.5662	1				52.6062	1
103.856	0		126.726	1				53.0215	1
84.8986	0		23.8387	1				53.0854	1
104.604	0		62.6728	1				55.8528	0
71.5164	0		90.758	1				56.8721	0
135.913	0		40.8868	1				57.7859	0
85.9006	0		19.9537	1				58.1178	1
115.461	0		48.2962	1				58.5182	1
93.5407	0		67.2646	1				59.7537	0
141.476	0		22.9885	1				62.2315	1
93.9872	0		28.2714	1				62.6728	1
141.336	0		64.5545	1				62.8024	0
154.385	0		112.026	1				63.3698	0
138.981	0		110.401	1				63.6202	0
112.487	0		70.7497	1				63.6577	1
57.7859	0		44.6029	1				64.1962	0
87.2474	0		120.951	1				64.5545	1
110.03	0		30.9948	1				65.1262	0
100.348	0		33.6683	1				65.8292	0
114.216	0		50.4255	1				66.7191	0
83.1355	0		91.4634	1				67.0892	0
117.969	0		98.7955	1				67.2646	1
151.245	0		51.6383	1				67.8503	0
116.706	0			1				67.933	0
113.166	0			1				68.2427	0
130.201	0			1				69.5121	0
68.2427	0			1				69.911	1
165.295	0			1				70.7497	1
92.8701	0			1				70.9129	0
82.3497	0			1				71.5164	0
113.523	0			1				72.1386	0
173.95	0			1				72.8712	0
94.6904	0			1				73.6019	1
131.961	0			1				73.909	0
90.9116	0			1				75.0714	0
113.454	0			1				75.0858	0
62.8024	0			1				75.9784	0
92.4304	0			1				76.0819	0
50.579	0			1				77.0283	0
100.734	0			1				77.122	0
97.0668	0			1				77.2359	0
118.262	0			1				78.2023	0
106.679	0			1				78.5891	0
121.702	0			1				78.768	1
99.3991	0			1				79.4339	0
83.4692	0			1				80.251	0
86.8866	0			1				82.002	0
88.8981	0			1				82.3497	0
64.1962	0			1				83.1355	0
180.298	0			1				83.4692	0
178.781	0			1				83.735	1
85.8682	0			1				83.8719	0
140.256	0			1				84.4905	0
106.608	0			1				84.8986	0
76.0819	0			1				85.8337	0
67.0892	0			1				85.8682	0
98.7179	0			1				85.9006	0
37.6497	0			1				86.8866	0
150.925	0			1				87.2474	0
65.1262	0			1				87.5956	0
131.853	0			1				87.8401	0
141.448	0			1				87.8955	1
115.605	0			1				88.3562	0
93.7608	0			1				88.8981	0
88.3562	0			1				89.0227	0
130.86	0			1				89.2778	1
137.648	0			1				89.2939	0
137.897	0			1				89.9773	0
110.325	0			1				90.758	1
133.536	0			1				90.9116	0
144.648	0			1				91.2909	0
63.6202	0			1				91.4634	1
78.5891	0			1				91.8016	0
117.512	0			1				92.253	0
69.5121	0			1				92.4304	0
111.033	0			1				92.694	0
97.128	0			1				92.8701	0
120.743	0			1				93.5407	0
63.3698	0			1				93.5717	0
70.9129	0			1				93.75	0
89.9773	0			1				93.7608	0
77.122	0			1				93.9872	0
136.208	0			1				94.6904	0
96.5739	0			1				94.7716	0
131.853	0			1				96.0168	0
91.8016	0			1				96.5286	0
82.002	0			1				96.5739	0
78.2023	0			1				97.0611	0
135.786	0			1				97.0668	0
105.371	0			1				97.128	0
106.495	0			1				97.6374	0
59.7537	0			1				98.7179	0
152.923	0			1				98.7955	1
147.609	0			1				99.0323	1
156.802	0			1				99.3991	0
87.5956	0			1				100.07	0
164.605	0			1				100.348	0
92.253	0			1				100.734	0
100.07	0			1				101.416	0
112.58	0			1				101.519	0
83.8719	0			1				101.867	0
89.0227	0			1				103.213	0
101.416	0			1				103.414	0
109.624	0			1				103.856	0
149.112	0			1				104.604	0
103.414	0			1				105.371	0
67.8503	0			1				105.383	0
92.694	0			1				106.495	0
124.536	0			1				106.608	0
122.615	0			1				106.679	0
154.766	0			1				107.118	0
79.4339	0			1				108.378	0
110.32	0			1				108.703	1
96.5286	0			1				109.624	0
65.8292	0			1				110.011	1
97.6374	0			1				110.03	0
97.0611	0			1				110.32	0
72.8712	0			1				110.325	0
75.9784	0			1				110.401	1
134.153	0			1				110.851	0
67.933	0			1				111.033	0
132.629	0			1				111.413	0
134.152	0			1				112.026	1
77.0283	0			1				112.487	0
131.175	0			1				112.58	0
152.071	0			1				112.689	0
75.0858	0			1				113.166	0
115.579	0			1				113.454	0
125.35	0			1				113.523	0
137.877	0			1				114.216	0
148.121	0			1				115.185	0
122.805	0			1				115.461	0
110.851	0			1				115.579	0
107.118	0			1				115.605	0
93.5717	0			1				116.614	0
115.185	0			1				116.706	0
141.666	0			1				117.281	0
141.765	0			1				117.35	1
77.2359	0			1				117.512	0
21.6852	0			1				117.831	0
153.337	0			1				117.969	0
66.7191	0			1				118.262	0
131.885	0			1				119.929	0
132.735	0			1				120.743	0
101.519	0			1				120.951	1
49.8099	0			1				121.702	0
73.909	0			1				122.615	0
55.8528	0			1				122.805	0
182.59	0			1				123.204	0
52.1664	0			1				124.536	0
108.378	0			1				124.582	0
139.336	0			1				125.35	0
160.742	0			1				126.653	0
89.2939	0			1				126.726	1
56.8721	0			1				128.942	0
160.529	0			1				130.201	0
	0			1				130.729	0
	0			1				130.86	0
	0			1				131.175	0
	0			1				131.853	0
	0			1				131.853	0
	0			1				131.885	0
	0			1				131.961	0
	0			1				132.629	0
	0			1				132.735	0
	0			1				133.536	0
	0			1				133.925	0
	0			1				134.152	0
	0			1				134.153	0
	0			1				135.786	0
	0			1				135.913	0
	0			1				136.208	0
	0			1				136.715	0
	0			1				137.648	0
	0			1				137.877	0
	0			1				137.897	0
	0			1				138.079	0
	0			1				138.383	0
	0			1				138.981	0
	0			1				139.336	0
	0			1				139.44	0
	0			1				140.256	0
	0			1				140.634	0
	0			1				141.336	0
	0			1				141.448	0
	0			1				141.476	0
	0			1				141.666	0
	0			1				141.765	0
	0			1				144.01	0
	0			1				144.648	0
	0			1				147.609	0
	0			1				148.121	0
	0			1				149.112	0
	0			1				149.431	0
	0			1				150.925	0
	0			1				151.245	0
	0			1				152.071	0
	0			1				152.923	0
	0			1				153.337	0
	0			1				154.385	0
	0			1				154.766	0
	0			1				156.802	0
	0			1				160.529	0
	0			1				160.742	0
	0			1				164.605	0
	0			1				165.295	0
	0			1				173.95	0
	0			1				178.781	0
	0			1				180.298	0
	0			1				182.59	0
	0			1				Distance	Score
	0			1
	0			1
	0			1
	0			1
	0			1
	0			1
	0			1
	0			1
	0			1
	0			1
	0			1
	0			1
	0			1
	0			1
	0			1
	0			1
	0			1
	0			1
	0			1
	0			1
	0			1
	0			1
	0			1
	0			1
	0			1
	0			1
	0			1
	0			1
	0			1
	0			1
	0			1
	0			1
	0			1
	0			1
	0			1
	0			1
	0			1
	0			1
	0			1
	0			1
	0			1
	0			1
	0			1
	0			1
	0			1
	0			1
	0			1
	0			1
	0			1
	0			1
	0			1
	0			1
	0			1
	0			1
	0			1
	0			1
	0			1
	0			1
	0			1
	0			1
	0			1
	0			1
	0			1
	0			1
	0			1
	0			1
	0			1
	0			1
	0			1
	0			1
	0			1
	0			1
	0			1
	0			1
	0			1
	0			1
	0			1
	0			1
	0			1
	0			1
	0			1
	0			1
	0			1
	0			1
	0			1
	0			1
	0			1
	0			1
	0			1
	0			1
	0			1
	0			1
	0			1
	0			1
	0			1
	0			1
	0			1
	0			1
	0			1
	0			1
	0			1
	0			1
	0			1
	0			1
	0			1
	0			1
	0			1
	0			1
	0			1
	0			1
	0			1
	0			1
	0			1
	0			1
	0			1
	0			1
	0			1
	0			1
	0			1
	0			1
	0			1
	0			1
	0			1
	0			1
	0			1
	0			1
	0			1
	0			1
	0			1
	0			1
	0			1
	0			1
	0			1
	0			1
	0			1
	0			1
	0			1
	0			1
	0			1
	0			1
	0			1
	0			1
	0			1
	0			1
	0			1
	0			1
	0			1
	0			1
	0			1
	0			1
	0			1
	0			1
	0			1
	0			1
	0			1
	0			1
	0			1
	0			1
	0			1
	0			1
	0			1
	0			1
	0			1
	0			1
	0			1
	0			1
	0			1
	0			1
	0			1
	0			1
	0			1
	0			1
	0			1
	0			1
	0			1
	0			1
	0			1
	0			1
	0			1
	0			1
	0			1
	0			1
	0			1
	0			1
	0			1
	0			1
	0			1
	0			1
	0			1
	0			1
	0			1
	0			1
	0			1
	0			1
	0			1
	0			1
	0			1
	0			1
	0			1
	0			1
	0			1
	0			1
	0			1
	0			1
	0			1
	0			1
	0			1
	0			1
	0			1
	0			1
	0			1
	0			1
	0			1
	0			1
	0			1
	0			1
	0			1
	0			1
	0			1
	0			1
	0			1
	0			1
	0			1
	0			1
	0			1
	0			1
	0			1
	0			1
	0			1
	0			1
	0			1
	0			1
	0			1
	0			1
	0			1
	0			1
	0			1
	0			1
	0			1
	0			1
	0			1
	0			1
	0			1
	0			1
	0			1
	0			1
	0			1
	0			1
	0			1
	0			1
	0			1
	0			1
	0			1
	0			1
	0			1
	0			1
	0			1
	0			1
	0			1
	0			1
	0			1
	0			1
	0			1
	0			1
	0			1
	0			1
	0			1
	0			1
	0			1
	0			1
	0			1
	0			1
	0			1
	0			1
	0			1
	0			1
	0			1
	0			1
	0			1
	0			1
	0			1
	0			1
	0			1
	0			1
	0			1
	0			1
	0			1
	0			1
	0			1
	0			1
	0			1
	0			1
	0			1
	0			1
	0			1
	0			1
	0			1
	0			1
	0			1
	0			1
	0			1
	0			1
	0			1
	0			1
	0			1
	0			1
	0			1
	0			1
	0			1
	0			1
	0			1
	0
	0
	0
	0
	0
	0
	0
	0
	0
	0
	0
	0
	0
	0
	0
	0
	0
	0
	0
	0
	0
	0
	0
	0
	0
	0
	0
	0
	0
	0
	0
	0
	0
	0
	0
	0
	0
	0
	0
	0
	0
	0
	0
	0
	0
	0
	0
	0
	0
	0
	0
	0
	0
	0
	0
	0
	0
	0
	0
	0
	0
	0
	0
	0
	0
	0
	0
	0
	0
	0
	0
	0
	0
	0
	0
	0
	0
	0
	0
	0
	0
	0
	0
	0
	0
	0
	0
	0
	0
	0
	0
	0
	0
	0
	0
	0
	0
	0
	0
	0
	0
	0
	0
	0
	0
	0
	0
	0
	0
	0
	0
	0
	0
	0
	0
	0
	0
	0
	0
	0
	0
	0
	0
	0
	0
	0
	0
	0
	0
	0
	0
	0
	0
	0
	0
	0
	0
	0
	0
	0
	0
	0
	0
	0
	0
	0
	0
	0
	0
	0
	0
	0
	0
	0
	0
	0
	0
	0
	0
	0
	0
	0
	0
	0
	0
	0
	0
	0
	0
	0
	0
	0
	0
	0

## Sheet: Fig 5B,C,D FGF + LDN raw tracks
	Image_ID	Track	Slice	X	Y	Follicle_COMX	Follicle_COMY	Distance_from_COM	Inside?
1	TCF Lef FGF and LDN 1 drift corrected cropped.tif	1	1	408	197	247	247	193.313	No
2	TCF Lef FGF and LDN 1 drift corrected cropped.tif	1	2	404	191	247	247	193.437	No
3	TCF Lef FGF and LDN 1 drift corrected cropped.tif	1	3	399	195	247	247	187.043	No
4	TCF Lef FGF and LDN 1 drift corrected cropped.tif	1	4	393	200	247	247	179.254	No
5	TCF Lef FGF and LDN 1 drift corrected cropped.tif	1	5	393	196	247	247	181.604	No
6	TCF Lef FGF and LDN 1 drift corrected cropped.tif	1	6	403	186	247	247	195.602	No
7	TCF Lef FGF and LDN 1 drift corrected cropped.tif	1	7	409	184	247	247	201.604	No
8	TCF Lef FGF and LDN 1 drift corrected cropped.tif	1	8	408	182	247	247	202.002	No
9	TCF Lef FGF and LDN 1 drift corrected cropped.tif	1	9	409	180	247	247	204.01	No
10	TCF Lef FGF and LDN 1 drift corrected cropped.tif	1	10	408	175	247	247	206.306	No
11	TCF Lef FGF and LDN 1 drift corrected cropped.tif	2	1	270	383	245	245	81.9085	No
12	TCF Lef FGF and LDN 1 drift corrected cropped.tif	2	2	271	380	245	245	79.3788	No
13	TCF Lef FGF and LDN 1 drift corrected cropped.tif	2	3	274	376	245	245	76.6942	No
14	TCF Lef FGF and LDN 1 drift corrected cropped.tif	2	4	275	373	245	245	74.3236	No
15	TCF Lef FGF and LDN 1 drift corrected cropped.tif	2	5	270	370	245	245	69.6419	No
16	TCF Lef FGF and LDN 1 drift corrected cropped.tif	2	6	272	365	245	245	65.7951	No
17	TCF Lef FGF and LDN 1 drift corrected cropped.tif	2	7	268	365	245	245	64.2573	No
18	TCF Lef FGF and LDN 1 drift corrected cropped.tif	2	8	272	358	245	245	59.4811	No
19	TCF Lef FGF and LDN 1 drift corrected cropped.tif	2	9	269	357	245	245	57.2713	No
20	TCF Lef FGF and LDN 1 drift corrected cropped.tif	2	10	266	357	245	245	56.0803	No
21	TCF Lef FGF and LDN 1 drift corrected cropped.tif	2	11	267	357	245	245	56.4624	No
22	TCF Lef FGF and LDN 1 drift corrected cropped.tif	2	12	267	357	245	245	56.4624	No
23	TCF Lef FGF and LDN 1 drift corrected cropped.tif	2	13	267	357	245	245	56.4624	No
24	TCF Lef FGF and LDN 1 drift corrected cropped.tif	2	14	267	357	245	245	56.4624	No
25	TCF Lef FGF and LDN 1 drift corrected cropped.tif	2	15	268	358	245	245	57.7754	No
26	TCF Lef FGF and LDN 1 drift corrected cropped.tif	2	16	269	360	245	245	60.0083	No
27	TCF Lef FGF and LDN 1 drift corrected cropped.tif	2	17	268	360	245	245	59.6154	No
28	TCF Lef FGF and LDN 1 drift corrected cropped.tif	2	18	268	353	245	245	53.2259	No
29	TCF Lef FGF and LDN 1 drift corrected cropped.tif	2	19	268	357	245	245	56.8595	No
30	TCF Lef FGF and LDN 1 drift corrected cropped.tif	2	20	267	359	245	245	58.3095	No
31	TCF Lef FGF and LDN 1 drift corrected cropped.tif	2	21	265	353	245	245	52	No
32	TCF Lef FGF and LDN 1 drift corrected cropped.tif	2	22	267	353	245	245	52.8015	No
33	TCF Lef FGF and LDN 1 drift corrected cropped.tif	2	23	268	349	245	245	49.6488	No
34	TCF Lef FGF and LDN 1 drift corrected cropped.tif	2	24	269	345	247	247	46.5296	No
35	TCF Lef FGF and LDN 1 drift corrected cropped.tif	2	25	268	344	247	247	45.1774	No
36	TCF Lef FGF and LDN 1 drift corrected cropped.tif	2	26	268	344	247	247	45.1774	No
37	TCF Lef FGF and LDN 1 drift corrected cropped.tif	2	27	268	344	247	247	45.1774	No
38	TCF Lef FGF and LDN 1 drift corrected cropped.tif	2	28	269	339	247	247	41.3401	No
39	TCF Lef FGF and LDN 1 drift corrected cropped.tif	2	29	268	333	247	247	35.805	Yes
40	TCF Lef FGF and LDN 1 drift corrected cropped.tif	2	30	267	333	247	247	35.2278	Yes
41	TCF Lef FGF and LDN 1 drift corrected cropped.tif	2	31	267	333	247	247	35.2278	Yes
42	TCF Lef FGF and LDN 1 drift corrected cropped.tif	2	32	267	333	247	247	35.2278	Yes
43	TCF Lef FGF and LDN 1 drift corrected cropped.tif	2	33	267	332	247	247	34.4093	Yes
44	TCF Lef FGF and LDN 1 drift corrected cropped.tif	2	34	268	329	247	247	32.6497	Yes
45	TCF Lef FGF and LDN 1 drift corrected cropped.tif	2	35	268	326	247	247	30.4138	Yes
46	TCF Lef FGF and LDN 1 drift corrected cropped.tif	2	36	266	325	247	247	28.3196	Yes
47	TCF Lef FGF and LDN 1 drift corrected cropped.tif	2	37	266	325	247	247	28.3196	Yes
48	TCF Lef FGF and LDN 1 drift corrected cropped.tif	2	38	266	324	247	247	27.5862	Yes
49	TCF Lef FGF and LDN 1 drift corrected cropped.tif	2	39	266	324	247	247	27.5862	Yes
50	TCF Lef FGF and LDN 1 drift corrected cropped.tif	2	40	266	324	247	247	27.5862	Yes
51	TCF Lef FGF and LDN 1 drift corrected cropped.tif	2	41	269	321	247	247	27.8029	Yes
52	TCF Lef FGF and LDN 1 drift corrected cropped.tif	2	42	269	322	247	247	28.4253	Yes
53	TCF Lef FGF and LDN 1 drift corrected cropped.tif	2	43	269	322	247	247	28.4253	Yes
54	TCF Lef FGF and LDN 1 drift corrected cropped.tif	2	44	269	322	247	247	28.4253	Yes
55	TCF Lef FGF and LDN 1 drift corrected cropped.tif	2	45	268	324	247	247	29	Yes
56	TCF Lef FGF and LDN 1 drift corrected cropped.tif	2	46	268	324	247	247	29	Yes
57	TCF Lef FGF and LDN 1 drift corrected cropped.tif	2	47	270	320	247	247	28.0179	Yes
58	TCF Lef FGF and LDN 1 drift corrected cropped.tif	2	48	270	323	247	247	29.8329	Yes
59	TCF Lef FGF and LDN 1 drift corrected cropped.tif	2	49	268	324	247	247	29	Yes
60	TCF Lef FGF and LDN 1 drift corrected cropped.tif	2	50	268	324	247	247	29	Yes
61	TCF Lef FGF and LDN 1 drift corrected cropped.tif	2	51	268	324	247	247	29	Yes
62	TCF Lef FGF and LDN 1 drift corrected cropped.tif	2	52	268	323	247	247	28.3196	Yes
63	TCF Lef FGF and LDN 1 drift corrected cropped.tif	2	53	268	323	247	247	28.3196	Yes
64	TCF Lef FGF and LDN 1 drift corrected cropped.tif	2	54	268	323	247	247	28.3196	Yes
65	TCF Lef FGF and LDN 1 drift corrected cropped.tif	2	55	267	323	247	247	27.5862	Yes
66	TCF Lef FGF and LDN 1 drift corrected cropped.tif	2	56	269	322	247	247	28.4253	Yes
67	TCF Lef FGF and LDN 1 drift corrected cropped.tif	2	57	271	321	247	247	29.4109	Yes
68	TCF Lef FGF and LDN 1 drift corrected cropped.tif	2	58	272	321	247	247	30.2324	Yes
69	TCF Lef FGF and LDN 1 drift corrected cropped.tif	2	59	272	321	247	247	30.2324	Yes
70	TCF Lef FGF and LDN 1 drift corrected cropped.tif	2	60	273	322	247	247	31.6228	Yes
71	TCF Lef FGF and LDN 1 drift corrected cropped.tif	2	61	273	322	247	247	31.6228	Yes
72	TCF Lef FGF and LDN 1 drift corrected cropped.tif	2	62	274	322	247	247	32.45	Yes
73	TCF Lef FGF and LDN 1 drift corrected cropped.tif	2	63	277	320	247	247	34	Yes
74	TCF Lef FGF and LDN 1 drift corrected cropped.tif	2	64	277	320	247	247	34	Yes
75	TCF Lef FGF and LDN 1 drift corrected cropped.tif	2	65	277	320	247	247	34	Yes
76	TCF Lef FGF and LDN 1 drift corrected cropped.tif	2	66	271	322	247	247	30	Yes
77	TCF Lef FGF and LDN 1 drift corrected cropped.tif	2	67	269	323	247	247	29.0689	Yes
78	TCF Lef FGF and LDN 1 drift corrected cropped.tif	2	68	266	324	247	247	27.5862	Yes
79	TCF Lef FGF and LDN 1 drift corrected cropped.tif	2	69	265	324	247	247	26.9072	Yes
80	TCF Lef FGF and LDN 1 drift corrected cropped.tif	2	70	264	324	247	247	26.2488	Yes
81	TCF Lef FGF and LDN 1 drift corrected cropped.tif	2	71	263	324	247	247	25.6125	Yes
82	TCF Lef FGF and LDN 1 drift corrected cropped.tif	2	72	262	324	247	247	25	Yes
83	TCF Lef FGF and LDN 1 drift corrected cropped.tif	2	73	262	324	247	247	25	Yes
84	TCF Lef FGF and LDN 1 drift corrected cropped.tif	2	74	260	324	247	247	23.8537	Yes
85	TCF Lef FGF and LDN 1 drift corrected cropped.tif	2	75	259	324	247	247	23.3238	Yes
86	TCF Lef FGF and LDN 1 drift corrected cropped.tif	2	76	259	323	247	247	22.4722	Yes
87	TCF Lef FGF and LDN 1 drift corrected cropped.tif	2	77	262	323	247	247	24.2074	Yes
88	TCF Lef FGF and LDN 1 drift corrected cropped.tif	2	78	262	323	247	247	24.2074	Yes
89	TCF Lef FGF and LDN 1 drift corrected cropped.tif	2	79	262	324	247	247	25	Yes
90	TCF Lef FGF and LDN 1 drift corrected cropped.tif	2	80	262	324	247	247	25	Yes
91	TCF Lef FGF and LDN 1 drift corrected cropped.tif	2	81	260	322	247	247	22.2036	Yes
92	TCF Lef FGF and LDN 1 drift corrected cropped.tif	2	82	258	321	247	247	20.2485	Yes
93	TCF Lef FGF and LDN 1 drift corrected cropped.tif	2	83	259	320	247	247	20	Yes
94	TCF Lef FGF and LDN 1 drift corrected cropped.tif	2	84	258	320	247	247	19.4165	Yes
95	TCF Lef FGF and LDN 1 drift corrected cropped.tif	2	85	257	320	247	247	18.868	Yes
96	TCF Lef FGF and LDN 1 drift corrected cropped.tif	2	86	255	319	247	247	17	Yes
97	TCF Lef FGF and LDN 1 drift corrected cropped.tif	2	87	254	319	247	247	16.5529	Yes
98	TCF Lef FGF and LDN 1 drift corrected cropped.tif	2	88	256	319	247	247	17.4929	Yes
99	TCF Lef FGF and LDN 1 drift corrected cropped.tif	2	89	256	322	247	247	20.1246	Yes
100	TCF Lef FGF and LDN 1 drift corrected cropped.tif	2	90	254	322	245	245	19.2354	Yes
101	TCF Lef FGF and LDN 1 drift corrected cropped.tif	2	91	252	322	245	245	18.3848	Yes
102	TCF Lef FGF and LDN 1 drift corrected cropped.tif	2	92	252	322	245	245	18.3848	Yes
103	TCF Lef FGF and LDN 1 drift corrected cropped.tif	2	93	250	322	245	245	17.72	Yes
104	TCF Lef FGF and LDN 1 drift corrected cropped.tif	2	94	248	322	245	245	17.2627	Yes
105	TCF Lef FGF and LDN 1 drift corrected cropped.tif	2	95	248	322	245	245	17.2627	Yes
106	TCF Lef FGF and LDN 1 drift corrected cropped.tif	2	96	248	322	245	245	17.2627	Yes
107	TCF Lef FGF and LDN 1 drift corrected cropped.tif	2	97	248	322	245	245	17.2627	Yes
108	TCF Lef FGF and LDN 1 drift corrected cropped.tif	2	98	248	322	245	245	17.2627	Yes
109	TCF Lef FGF and LDN 1 drift corrected cropped.tif	2	99	248	322	245	245	17.2627	Yes
110	TCF Lef FGF and LDN 1 drift corrected cropped.tif	2	100	248	320	245	245	15.2971	Yes
111	TCF Lef FGF and LDN 1 drift corrected cropped.tif	2	101	248	316	245	245	11.4018	Yes
112	TCF Lef FGF and LDN 1 drift corrected cropped.tif	2	102	248	316	245	245	11.4018	Yes
113	TCF Lef FGF and LDN 1 drift corrected cropped.tif	2	103	247	316	245	245	11.1803	Yes
114	TCF Lef FGF and LDN 1 drift corrected cropped.tif	2	104	247	314	245	245	9.2195	Yes
115	TCF Lef FGF and LDN 1 drift corrected cropped.tif	2	105	247	316	245	245	11.1803	Yes
116	TCF Lef FGF and LDN 1 drift corrected cropped.tif	2	106	246	316	245	245	11.0454	Yes
117	TCF Lef FGF and LDN 1 drift corrected cropped.tif	2	107	246	317	245	245	12.0416	Yes
118	TCF Lef FGF and LDN 1 drift corrected cropped.tif	2	108	245	315	245	245	10	Yes
119	TCF Lef FGF and LDN 1 drift corrected cropped.tif	2	109	245	314	245	245	9	Yes
120	TCF Lef FGF and LDN 1 drift corrected cropped.tif	2	110	245	313	245	245	8	Yes
121	TCF Lef FGF and LDN 1 drift corrected cropped.tif	2	111	248	311	245	245	6.7082	Yes
122	TCF Lef FGF and LDN 1 drift corrected cropped.tif	2	112	248	310	245	245	5.831	Yes
123	TCF Lef FGF and LDN 1 drift corrected cropped.tif	2	113	252	308	247	247	6.4031	Yes
124	TCF Lef FGF and LDN 1 drift corrected cropped.tif	2	114	252	306	247	247	5.3852	Yes
125	TCF Lef FGF and LDN 1 drift corrected cropped.tif	2	115	252	305	247	247	5.099	Yes
126	TCF Lef FGF and LDN 1 drift corrected cropped.tif	2	116	251	302	247	247	4.4721	Yes
127	TCF Lef FGF and LDN 1 drift corrected cropped.tif	2	117	249	306	247	247	2.8284	Yes
128	TCF Lef FGF and LDN 1 drift corrected cropped.tif	2	118	251	305	247	247	4.1231	Yes
129	TCF Lef FGF and LDN 1 drift corrected cropped.tif	2	119	251	305	247	247	4.1231	Yes
130	TCF Lef FGF and LDN 1 drift corrected cropped.tif	2	120	249	303	247	247	2.2361	Yes
131	TCF Lef FGF and LDN 1 drift corrected cropped.tif	2	121	248	301	247	247	3.1623	Yes
132	TCF Lef FGF and LDN 1 drift corrected cropped.tif	2	122	246	296	246	246	8	Yes
133	TCF Lef FGF and LDN 1 drift corrected cropped.tif	2	123	243	296	246	246	8.544	Yes
134	TCF Lef FGF and LDN 1 drift corrected cropped.tif	2	124	242	294	246	246	10.7703	Yes
135	TCF Lef FGF and LDN 1 drift corrected cropped.tif	2	125	237	292	237	237	12	Yes
136	TCF Lef FGF and LDN 1 drift corrected cropped.tif	2	126	237	292	237	237	12	Yes
137	TCF Lef FGF and LDN 1 drift corrected cropped.tif	2	127	234	288	232	232	15.1327	Yes
138	TCF Lef FGF and LDN 1 drift corrected cropped.tif	2	128	232	288	227	227	14.8661	Yes
139	TCF Lef FGF and LDN 1 drift corrected cropped.tif	2	129	232	288	227	227	14.8661	Yes
140	TCF Lef FGF and LDN 1 drift corrected cropped.tif	2	130	234	286	232	232	17.1172	Yes
141	TCF Lef FGF and LDN 1 drift corrected cropped.tif	2	131	234	286	232	232	17.1172	Yes
142	TCF Lef FGF and LDN 1 drift corrected cropped.tif	2	132	235	287	232	232	16.2788	Yes
143	TCF Lef FGF and LDN 1 drift corrected cropped.tif	2	133	235	287	232	232	16.2788	Yes
144	TCF Lef FGF and LDN 1 drift corrected cropped.tif	2	134	232	291	232	232	12	Yes
145	TCF Lef FGF and LDN 1 drift corrected cropped.tif	2	135	231	297	231	231	6	Yes
146	TCF Lef FGF and LDN 1 drift corrected cropped.tif	2	136	234	299	232	232	4.4721	Yes
147	TCF Lef FGF and LDN 1 drift corrected cropped.tif	2	137	234	298	232	232	5.3852	Yes
148	TCF Lef FGF and LDN 1 drift corrected cropped.tif	2	138	232	298	232	232	5	Yes
149	TCF Lef FGF and LDN 1 drift corrected cropped.tif	2	139	231	294	227	227	8.9443	Yes
150	TCF Lef FGF and LDN 1 drift corrected cropped.tif	2	140	231	294	227	227	8.9443	Yes
151	TCF Lef FGF and LDN 1 drift corrected cropped.tif	2	141	231	294	227	227	8.9443	Yes
152	TCF Lef FGF and LDN 1 drift corrected cropped.tif	2	142	232	294	232	232	9	Yes
153	TCF Lef FGF and LDN 1 drift corrected cropped.tif	2	143	234	295	232	232	8.2462	Yes
154	TCF Lef FGF and LDN 1 drift corrected cropped.tif	2	144	234	295	232	232	8.2462	Yes
155	TCF Lef FGF and LDN 1 drift corrected cropped.tif	2	145	235	295	232	232	8.544	Yes
156	TCF Lef FGF and LDN 1 drift corrected cropped.tif	2	146	237	296	237	237	8	Yes
157	TCF Lef FGF and LDN 1 drift corrected cropped.tif	2	147	239	296	237	237	8.2462	Yes
158	TCF Lef FGF and LDN 1 drift corrected cropped.tif	2	148	234	296	232	232	7.2801	Yes
159	TCF Lef FGF and LDN 1 drift corrected cropped.tif	2	149	232	294	232	232	9	Yes
160	TCF Lef FGF and LDN 1 drift corrected cropped.tif	2	150	231	294	227	227	8.9443	Yes
161	TCF Lef FGF and LDN 1 drift corrected cropped.tif	2	151	229	295	227	227	7.2801	Yes
162	TCF Lef FGF and LDN 1 drift corrected cropped.tif	2	152	228	296	227	227	6.0828	Yes
163	TCF Lef FGF and LDN 1 drift corrected cropped.tif	2	153	227	299	227	227	3	Yes
164	TCF Lef FGF and LDN 1 drift corrected cropped.tif	2	154	227	299	227	227	3	Yes
165	TCF Lef FGF and LDN 1 drift corrected cropped.tif	2	155	226	299	226	226	3	Yes
166	TCF Lef FGF and LDN 1 drift corrected cropped.tif	2	156	226	297	223	223	5	Yes
167	TCF Lef FGF and LDN 1 drift corrected cropped.tif	2	157	226	296	223	223	5.831	Yes
168	TCF Lef FGF and LDN 1 drift corrected cropped.tif	2	158	223	297	223	223	4	Yes
169	TCF Lef FGF and LDN 1 drift corrected cropped.tif	2	159	223	297	223	223	4	Yes
170	TCF Lef FGF and LDN 1 drift corrected cropped.tif	2	160	223	297	223	223	4	Yes
171	TCF Lef FGF and LDN 1 drift corrected cropped.tif	2	161	223	297	223	223	4	Yes
172	TCF Lef FGF and LDN 1 drift corrected cropped.tif	2	162	223	297	223	223	4	Yes
173	TCF Lef FGF and LDN 1 drift corrected cropped.tif	2	163	223	298	223	223	3	Yes
174	TCF Lef FGF and LDN 1 drift corrected cropped.tif	2	164	222	301	222	222	0	Yes
175	TCF Lef FGF and LDN 1 drift corrected cropped.tif	2	165	223	303	224	224	1.4142	Yes
176	TCF Lef FGF and LDN 1 drift corrected cropped.tif	2	166	226	301	226	226	1	Yes
177	TCF Lef FGF and LDN 1 drift corrected cropped.tif	2	167	226	299	226	226	3	Yes
178	TCF Lef FGF and LDN 1 drift corrected cropped.tif	2	168	226	299	226	226	3	Yes
179	TCF Lef FGF and LDN 1 drift corrected cropped.tif	2	169	226	300	226	226	2	Yes
180	TCF Lef FGF and LDN 1 drift corrected cropped.tif	2	170	226	296	223	223	5.831	Yes
181	TCF Lef FGF and LDN 1 drift corrected cropped.tif	2	171	226	294	223	223	7.6158	Yes
182	TCF Lef FGF and LDN 1 drift corrected cropped.tif	2	172	223	292	223	223	9	Yes
183	TCF Lef FGF and LDN 1 drift corrected cropped.tif	2	173	223	294	223	223	7	Yes
184	TCF Lef FGF and LDN 1 drift corrected cropped.tif	2	174	223	294	223	223	7	Yes
185	TCF Lef FGF and LDN 1 drift corrected cropped.tif	2	175	223	299	223	223	2	Yes
186	TCF Lef FGF and LDN 1 drift corrected cropped.tif	2	176	223	298	223	223	3	Yes
187	TCF Lef FGF and LDN 1 drift corrected cropped.tif	2	177	223	294	223	223	7	Yes
188	TCF Lef FGF and LDN 1 drift corrected cropped.tif	2	178	223	294	223	223	7	Yes
189	TCF Lef FGF and LDN 1 drift corrected cropped.tif	2	179	223	292	223	223	9	Yes
190	TCF Lef FGF and LDN 1 drift corrected cropped.tif	2	180	221	291	221	221	10	Yes
191	TCF Lef FGF and LDN 1 drift corrected cropped.tif	2	181	221	289	221	221	12	Yes
192	TCF Lef FGF and LDN 1 drift corrected cropped.tif	2	182	221	289	221	221	12	Yes
193	TCF Lef FGF and LDN 1 drift corrected cropped.tif	2	183	223	288	223	223	13	Yes
194	TCF Lef FGF and LDN 1 drift corrected cropped.tif	2	184	225	284	223	223	17.1172	Yes
195	TCF Lef FGF and LDN 1 drift corrected cropped.tif	2	185	231	282	227	227	20.3961	Yes
196	TCF Lef FGF and LDN 1 drift corrected cropped.tif	2	186	231	282	227	227	20.3961	Yes
197	TCF Lef FGF and LDN 1 drift corrected cropped.tif	2	187	231	285	227	227	17.4642	Yes
198	TCF Lef FGF and LDN 1 drift corrected cropped.tif	2	188	231	285	227	227	17.4642	Yes
199	TCF Lef FGF and LDN 1 drift corrected cropped.tif	2	189	234	285	232	232	18.1108	Yes
200	TCF Lef FGF and LDN 1 drift corrected cropped.tif	2	190	236	284	232	232	19.4165	Yes
201	TCF Lef FGF and LDN 1 drift corrected cropped.tif	2	191	236	283	232	232	20.3961	Yes
202	TCF Lef FGF and LDN 1 drift corrected cropped.tif	2	192	236	282	232	232	21.3776	Yes
203	TCF Lef FGF and LDN 1 drift corrected cropped.tif	2	193	234	285	232	232	18.1108	Yes
204	TCF Lef FGF and LDN 1 drift corrected cropped.tif	2	194	232	285	227	227	17.72	Yes
205	TCF Lef FGF and LDN 1 drift corrected cropped.tif	2	195	231	285	227	227	17.4642	Yes
206	TCF Lef FGF and LDN 1 drift corrected cropped.tif	2	196	233	279	227	227	23.7697	Yes
207	TCF Lef FGF and LDN 1 drift corrected cropped.tif	2	197	234	278	227	227	25	Yes
208	TCF Lef FGF and LDN 1 drift corrected cropped.tif	2	198	236	277	232	232	26.3059	Yes
209	TCF Lef FGF and LDN 1 drift corrected cropped.tif	2	199	237	276	232	232	27.4591	Yes
210	TCF Lef FGF and LDN 1 drift corrected cropped.tif	2	200	238	276	232	232	27.6586	Yes
211	TCF Lef FGF and LDN 1 drift corrected cropped.tif	2	201	237	276	232	232	27.4591	Yes
212	TCF Lef FGF and LDN 1 drift corrected cropped.tif	2	202	236	276	232	232	27.2947	Yes
213	TCF Lef FGF and LDN 1 drift corrected cropped.tif	2	203	238	277	232	232	26.6833	Yes
214	TCF Lef FGF and LDN 1 drift corrected cropped.tif	2	204	239	277	232	232	26.9258	Yes
215	TCF Lef FGF and LDN 1 drift corrected cropped.tif	2	205	240	277	237	237	27.1662	Yes
216	TCF Lef FGF and LDN 1 drift corrected cropped.tif	2	206	240	279	237	237	25.1794	Yes
217	TCF Lef FGF and LDN 1 drift corrected cropped.tif	2	207	240	279	237	237	25.1794	Yes
218	TCF Lef FGF and LDN 1 drift corrected cropped.tif	2	208	240	282	237	237	22.2036	Yes
219	TCF Lef FGF and LDN 1 drift corrected cropped.tif	2	209	240	282	237	237	22.2036	Yes
220	TCF Lef FGF and LDN 1 drift corrected cropped.tif	2	210	240	282	237	237	22.2036	Yes
221	TCF Lef FGF and LDN 1 drift corrected cropped.tif	2	211	240	282	237	237	22.2036	Yes
222	TCF Lef FGF and LDN 1 drift corrected cropped.tif	2	212	240	281	237	237	23.1948	Yes
223	TCF Lef FGF and LDN 1 drift corrected cropped.tif	2	213	242	279	246	246	25.318	Yes
224	TCF Lef FGF and LDN 1 drift corrected cropped.tif	2	214	242	279	246	246	25.318	Yes
225	TCF Lef FGF and LDN 1 drift corrected cropped.tif	2	215	242	279	246	246	25.318	Yes
226	TCF Lef FGF and LDN 1 drift corrected cropped.tif	2	216	242	279	246	246	25.318	Yes
227	TCF Lef FGF and LDN 1 drift corrected cropped.tif	2	217	244	280	246	246	24.0832	Yes
228	TCF Lef FGF and LDN 1 drift corrected cropped.tif	2	218	245	282	246	246	22.0227	Yes
229	TCF Lef FGF and LDN 1 drift corrected cropped.tif	2	219	243	284	246	246	20.2237	Yes
230	TCF Lef FGF and LDN 1 drift corrected cropped.tif	2	220	241	283	237	237	21.3776	Yes
231	TCF Lef FGF and LDN 1 drift corrected cropped.tif	2	221	240	283	237	237	21.2132	Yes
232	TCF Lef FGF and LDN 1 drift corrected cropped.tif	2	222	239	283	237	237	21.095	Yes
233	TCF Lef FGF and LDN 1 drift corrected cropped.tif	2	223	239	283	237	237	21.095	Yes
234	TCF Lef FGF and LDN 1 drift corrected cropped.tif	2	224	239	282	237	237	22.0907	Yes
235	TCF Lef FGF and LDN 1 drift corrected cropped.tif	2	225	239	282	237	237	22.0907	Yes
236	TCF Lef FGF and LDN 1 drift corrected cropped.tif	2	226	243	285	246	246	19.2354	Yes
237	TCF Lef FGF and LDN 1 drift corrected cropped.tif	2	227	243	285	246	246	19.2354	Yes
238	TCF Lef FGF and LDN 1 drift corrected cropped.tif	2	228	242	287	246	246	17.4642	Yes
239	TCF Lef FGF and LDN 1 drift corrected cropped.tif	2	229	242	286	246	246	18.4391	Yes
240	TCF Lef FGF and LDN 1 drift corrected cropped.tif	2	230	242	282	246	246	22.3607	Yes
241	TCF Lef FGF and LDN 1 drift corrected cropped.tif	2	231	242	282	246	246	22.3607	Yes
242	TCF Lef FGF and LDN 1 drift corrected cropped.tif	2	232	242	282	246	246	22.3607	Yes
243	TCF Lef FGF and LDN 1 drift corrected cropped.tif	2	233	242	282	246	246	22.3607	Yes
244	TCF Lef FGF and LDN 1 drift corrected cropped.tif	2	234	242	282	246	246	22.3607	Yes
245	TCF Lef FGF and LDN 1 drift corrected cropped.tif	2	235	239	278	232	232	25.9615	Yes
246	TCF Lef FGF and LDN 1 drift corrected cropped.tif	2	236	240	277	237	237	27.1662	Yes
247	TCF Lef FGF and LDN 1 drift corrected cropped.tif	3	1	39	344	193	193	166.388	No
248	TCF Lef FGF and LDN 1 drift corrected cropped.tif	3	2	40	342	193	193	164.712	No
249	TCF Lef FGF and LDN 1 drift corrected cropped.tif	3	3	41	342	193	193	163.783	No
250	TCF Lef FGF and LDN 1 drift corrected cropped.tif	3	4	44	340	193	193	160.256	No
251	TCF Lef FGF and LDN 1 drift corrected cropped.tif	3	5	44	340	193	193	160.256	No
252	TCF Lef FGF and LDN 1 drift corrected cropped.tif	3	6	43	342	193	193	161.929	No
253	TCF Lef FGF and LDN 1 drift corrected cropped.tif	3	7	41	342	193	193	163.783	No
254	TCF Lef FGF and LDN 1 drift corrected cropped.tif	3	8	41	344	193	193	164.539	No
255	TCF Lef FGF and LDN 1 drift corrected cropped.tif	3	9	42	346	193	193	164.396	No
256	TCF Lef FGF and LDN 1 drift corrected cropped.tif	3	10	42	346	193	193	164.396	No
257	TCF Lef FGF and LDN 1 drift corrected cropped.tif	3	11	42	346	193	193	164.396	No
258	TCF Lef FGF and LDN 1 drift corrected cropped.tif	3	12	41	347	193	193	165.711	No
259	TCF Lef FGF and LDN 1 drift corrected cropped.tif	3	13	41	347	193	193	165.711	No
260	TCF Lef FGF and LDN 1 drift corrected cropped.tif	3	14	40	348	193	193	167.027	No
261	TCF Lef FGF and LDN 1 drift corrected cropped.tif	3	15	41	347	193	193	165.711	No
262	TCF Lef FGF and LDN 1 drift corrected cropped.tif	3	16	42	347	193	193	164.794	No
263	TCF Lef FGF and LDN 1 drift corrected cropped.tif	3	17	42	347	193	193	164.794	No
264	TCF Lef FGF and LDN 1 drift corrected cropped.tif	3	18	42	347	193	193	164.794	No
265	TCF Lef FGF and LDN 1 drift corrected cropped.tif	3	19	42	349	193	193	165.605	No
266	TCF Lef FGF and LDN 1 drift corrected cropped.tif	3	20	42	350	193	193	166.018	No
267	TCF Lef FGF and LDN 1 drift corrected cropped.tif	3	21	49	348	193	193	158.824	No
268	TCF Lef FGF and LDN 1 drift corrected cropped.tif	3	22	49	348	193	193	158.824	No
269	TCF Lef FGF and LDN 1 drift corrected cropped.tif	3	23	49	349	193	193	159.248	No
270	TCF Lef FGF and LDN 1 drift corrected cropped.tif	3	24	49	347	193	193	158.405	No
271	TCF Lef FGF and LDN 1 drift corrected cropped.tif	3	25	48	347	193	193	159.314	No
272	TCF Lef FGF and LDN 1 drift corrected cropped.tif	3	26	45	349	193	193	162.874	No
273	TCF Lef FGF and LDN 1 drift corrected cropped.tif	3	27	45	349	193	193	162.874	No
274	TCF Lef FGF and LDN 1 drift corrected cropped.tif	3	28	45	350	193	193	163.294	No
275	TCF Lef FGF and LDN 1 drift corrected cropped.tif	3	29	50	344	193	193	156.263	No
276	TCF Lef FGF and LDN 1 drift corrected cropped.tif	3	30	48	348	193	193	159.731	No
277	TCF Lef FGF and LDN 1 drift corrected cropped.tif	3	31	48	347	193	193	159.314	No
278	TCF Lef FGF and LDN 1 drift corrected cropped.tif	3	32	46	349	193	193	161.966	No
279	TCF Lef FGF and LDN 1 drift corrected cropped.tif	3	33	45	350	193	193	163.294	No
280	TCF Lef FGF and LDN 1 drift corrected cropped.tif	3	34	45	347	193	193	162.049	No
281	TCF Lef FGF and LDN 1 drift corrected cropped.tif	3	35	45	349	193	193	162.874	No
282	TCF Lef FGF and LDN 1 drift corrected cropped.tif	3	36	45	350	193	193	163.294	No
283	TCF Lef FGF and LDN 1 drift corrected cropped.tif	3	37	44	350	193	193	164.201	No
284	TCF Lef FGF and LDN 1 drift corrected cropped.tif	3	38	44	350	193	193	164.201	No
285	TCF Lef FGF and LDN 1 drift corrected cropped.tif	3	39	44	350	193	193	164.201	No
286	TCF Lef FGF and LDN 1 drift corrected cropped.tif	3	40	44	350	193	193	164.201	No
287	TCF Lef FGF and LDN 1 drift corrected cropped.tif	3	41	44	350	193	193	164.201	No
288	TCF Lef FGF and LDN 1 drift corrected cropped.tif	3	42	43	348	193	193	164.283	No
289	TCF Lef FGF and LDN 1 drift corrected cropped.tif	3	43	43	348	193	193	164.283	No
290	TCF Lef FGF and LDN 1 drift corrected cropped.tif	3	44	41	349	193	193	166.517	No
291	TCF Lef FGF and LDN 1 drift corrected cropped.tif	3	45	41	350	193	193	166.928	No
292	TCF Lef FGF and LDN 1 drift corrected cropped.tif	3	46	42	350	193	193	166.018	No
293	TCF Lef FGF and LDN 1 drift corrected cropped.tif	3	47	42	350	193	193	166.018	No
294	TCF Lef FGF and LDN 1 drift corrected cropped.tif	3	48	42	350	193	193	166.018	No
295	TCF Lef FGF and LDN 1 drift corrected cropped.tif	3	49	42	351	193	193	166.436	No
296	TCF Lef FGF and LDN 1 drift corrected cropped.tif	3	50	42	353	193	193	167.287	No
297	TCF Lef FGF and LDN 1 drift corrected cropped.tif	3	51	42	352	193	193	166.859	No
298	TCF Lef FGF and LDN 1 drift corrected cropped.tif	3	52	41	351	193	193	167.344	No
299	TCF Lef FGF and LDN 1 drift corrected cropped.tif	3	53	41	351	193	193	167.344	No
300	TCF Lef FGF and LDN 1 drift corrected cropped.tif	3	54	43	350	193	193	165.109	No
301	TCF Lef FGF and LDN 1 drift corrected cropped.tif	3	55	43	349	193	193	164.694	No
302	TCF Lef FGF and LDN 1 drift corrected cropped.tif	3	56	42	348	193	193	165.197	No
303	TCF Lef FGF and LDN 1 drift corrected cropped.tif	3	57	42	348	193	193	165.197	No
304	TCF Lef FGF and LDN 1 drift corrected cropped.tif	3	58	42	348	193	193	165.197	No
305	TCF Lef FGF and LDN 1 drift corrected cropped.tif	3	59	42	348	193	193	165.197	No
306	TCF Lef FGF and LDN 1 drift corrected cropped.tif	3	60	43	347	193	193	163.878	No
307	TCF Lef FGF and LDN 1 drift corrected cropped.tif	3	61	42	348	193	193	165.197	No
308	TCF Lef FGF and LDN 1 drift corrected cropped.tif	3	62	41	347	193	193	165.711	No
309	TCF Lef FGF and LDN 1 drift corrected cropped.tif	3	63	42	346	193	193	164.396	No
310	TCF Lef FGF and LDN 1 drift corrected cropped.tif	3	64	43	345	193	193	163.083	No
311	TCF Lef FGF and LDN 1 drift corrected cropped.tif	3	65	45	343	193	193	160.462	No
312	TCF Lef FGF and LDN 1 drift corrected cropped.tif	3	66	45	343	193	193	160.462	No
313	TCF Lef FGF and LDN 1 drift corrected cropped.tif	3	67	48	343	193	193	157.699	No
314	TCF Lef FGF and LDN 1 drift corrected cropped.tif	3	68	48	344	193	193	158.095	No
315	TCF Lef FGF and LDN 1 drift corrected cropped.tif	3	69	44	345	193	193	162.163	No
316	TCF Lef FGF and LDN 1 drift corrected cropped.tif	3	70	45	347	193	193	162.049	No
317	TCF Lef FGF and LDN 1 drift corrected cropped.tif	3	71	44	347	193	193	162.963	No
318	TCF Lef FGF and LDN 1 drift corrected cropped.tif	3	72	44	346	193	193	162.561	No
319	TCF Lef FGF and LDN 1 drift corrected cropped.tif	3	73	45	346	193	193	161.645	No
320	TCF Lef FGF and LDN 1 drift corrected cropped.tif	3	74	45	346	193	193	161.645	No
321	TCF Lef FGF and LDN 1 drift corrected cropped.tif	3	75	45	345	193	193	161.245	No
322	TCF Lef FGF and LDN 1 drift corrected cropped.tif	3	76	45	347	193	193	162.049	No
323	TCF Lef FGF and LDN 1 drift corrected cropped.tif	3	77	45	347	193	193	162.049	No
324	TCF Lef FGF and LDN 1 drift corrected cropped.tif	3	78	44	347	193	193	162.963	No
325	TCF Lef FGF and LDN 1 drift corrected cropped.tif	3	79	45	347	193	193	162.049	No
326	TCF Lef FGF and LDN 1 drift corrected cropped.tif	3	80	45	347	193	193	162.049	No
327	TCF Lef FGF and LDN 1 drift corrected cropped.tif	3	81	45	351	193	193	163.719	No
328	TCF Lef FGF and LDN 1 drift corrected cropped.tif	3	82	42	350	193	193	166.018	No
329	TCF Lef FGF and LDN 1 drift corrected cropped.tif	3	83	41	348	193	193	166.111	No
330	TCF Lef FGF and LDN 1 drift corrected cropped.tif	3	84	40	351	193	193	168.253	No
331	TCF Lef FGF and LDN 1 drift corrected cropped.tif	3	85	40	351	193	193	168.253	No
332	TCF Lef FGF and LDN 1 drift corrected cropped.tif	3	86	41	351	193	193	167.344	No
333	TCF Lef FGF and LDN 1 drift corrected cropped.tif	3	87	44	355	193	193	166.364	No
334	TCF Lef FGF and LDN 1 drift corrected cropped.tif	3	88	40	356	193	193	170.394	No
335	TCF Lef FGF and LDN 1 drift corrected cropped.tif	3	89	40	356	193	193	170.394	No
336	TCF Lef FGF and LDN 1 drift corrected cropped.tif	3	90	40	356	193	193	170.394	No
337	TCF Lef FGF and LDN 1 drift corrected cropped.tif	3	91	39	357	193	193	171.732	No
338	TCF Lef FGF and LDN 1 drift corrected cropped.tif	3	92	41	353	193	193	168.19	No
339	TCF Lef FGF and LDN 1 drift corrected cropped.tif	3	93	42	353	193	193	167.287	No
340	TCF Lef FGF and LDN 1 drift corrected cropped.tif	3	94	41	357	193	193	169.941	No
341	TCF Lef FGF and LDN 1 drift corrected cropped.tif	3	95	41	357	193	193	169.941	No
342	TCF Lef FGF and LDN 1 drift corrected cropped.tif	3	96	40	358	193	193	171.283	No
343	TCF Lef FGF and LDN 1 drift corrected cropped.tif	3	97	39	359	193	193	172.627	No
344	TCF Lef FGF and LDN 1 drift corrected cropped.tif	3	98	39	359	193	193	172.627	No
345	TCF Lef FGF and LDN 1 drift corrected cropped.tif	3	99	39	359	193	193	172.627	No
346	TCF Lef FGF and LDN 1 drift corrected cropped.tif	3	100	39	359	193	193	172.627	No
347	TCF Lef FGF and LDN 1 drift corrected cropped.tif	3	101	39	359	193	193	172.627	No
348	TCF Lef FGF and LDN 1 drift corrected cropped.tif	3	102	41	359	193	193	170.845	No
349	TCF Lef FGF and LDN 1 drift corrected cropped.tif	3	103	45	362	193	193	168.716	No
350	TCF Lef FGF and LDN 1 drift corrected cropped.tif	3	104	48	361	193	193	165.605	No
351	TCF Lef FGF and LDN 1 drift corrected cropped.tif	3	105	48	359	193	193	164.648	No
352	TCF Lef FGF and LDN 1 drift corrected cropped.tif	3	106	47	359	193	193	165.53	No
353	TCF Lef FGF and LDN 1 drift corrected cropped.tif	3	107	45	360	193	193	167.765	No
354	TCF Lef FGF and LDN 1 drift corrected cropped.tif	3	108	45	361	193	193	168.238	No
355	TCF Lef FGF and LDN 1 drift corrected cropped.tif	3	109	45	361	193	193	168.238	No
356	TCF Lef FGF and LDN 1 drift corrected cropped.tif	3	110	41	359	193	193	170.845	No
357	TCF Lef FGF and LDN 1 drift corrected cropped.tif	3	111	41	359	193	193	170.845	No
358	TCF Lef FGF and LDN 1 drift corrected cropped.tif	3	112	41	359	193	193	170.845	No
359	TCF Lef FGF and LDN 1 drift corrected cropped.tif	3	113	41	360	193	193	171.304	No
360	TCF Lef FGF and LDN 1 drift corrected cropped.tif	3	114	38	356	193	193	172.192	No
361	TCF Lef FGF and LDN 1 drift corrected cropped.tif	3	115	36	356	193	193	173.994	No
362	TCF Lef FGF and LDN 1 drift corrected cropped.tif	3	116	37	359	193	193	174.413	No
363	TCF Lef FGF and LDN 1 drift corrected cropped.tif	3	117	37	360	193	193	174.863	No
364	TCF Lef FGF and LDN 1 drift corrected cropped.tif	3	118	38	357	193	193	172.63	No
365	TCF Lef FGF and LDN 1 drift corrected cropped.tif	3	119	40	351	193	193	168.253	No
366	TCF Lef FGF and LDN 1 drift corrected cropped.tif	3	120	36	345	193	193	169.543	No
367	TCF Lef FGF and LDN 1 drift corrected cropped.tif	3	121	38	344	193	193	167.314	No
368	TCF Lef FGF and LDN 1 drift corrected cropped.tif	3	122	39	344	193	193	166.388	No
369	TCF Lef FGF and LDN 1 drift corrected cropped.tif	3	123	39	343	193	193	166.012	No
370	TCF Lef FGF and LDN 1 drift corrected cropped.tif	3	124	38	343	193	193	166.94	No
371	TCF Lef FGF and LDN 1 drift corrected cropped.tif	3	125	36	344	193	193	169.169	No
372	TCF Lef FGF and LDN 1 drift corrected cropped.tif	3	126	40	347	193	193	166.628	No
373	TCF Lef FGF and LDN 1 drift corrected cropped.tif	3	127	40	345	193	193	165.846	No
374	TCF Lef FGF and LDN 1 drift corrected cropped.tif	3	128	39	345	193	193	166.769	No
375	TCF Lef FGF and LDN 1 drift corrected cropped.tif	3	129	39	345	193	193	166.769	No
376	TCF Lef FGF and LDN 1 drift corrected cropped.tif	3	130	39	342	193	193	165.641	No
377	TCF Lef FGF and LDN 1 drift corrected cropped.tif	3	131	38	342	193	193	166.571	No
378	TCF Lef FGF and LDN 1 drift corrected cropped.tif	3	132	38	342	193	193	166.571	No
379	TCF Lef FGF and LDN 1 drift corrected cropped.tif	3	133	40	343	193	193	165.085	No
380	TCF Lef FGF and LDN 1 drift corrected cropped.tif	3	134	40	342	193	193	164.712	No
381	TCF Lef FGF and LDN 1 drift corrected cropped.tif	3	135	42	342	193	193	162.856	No
382	TCF Lef FGF and LDN 1 drift corrected cropped.tif	3	136	43	342	193	193	161.929	No
383	TCF Lef FGF and LDN 1 drift corrected cropped.tif	3	137	43	342	193	193	161.929	No
384	TCF Lef FGF and LDN 1 drift corrected cropped.tif	3	138	43	340	193	193	161.186	No
385	TCF Lef FGF and LDN 1 drift corrected cropped.tif	3	139	45	342	193	193	160.078	No
386	TCF Lef FGF and LDN 1 drift corrected cropped.tif	3	140	46	342	193	193	159.154	No
387	TCF Lef FGF and LDN 1 drift corrected cropped.tif	3	141	46	345	193	193	160.328	No
388	TCF Lef FGF and LDN 1 drift corrected cropped.tif	3	142	48	342	193	193	157.309	No
389	TCF Lef FGF and LDN 1 drift corrected cropped.tif	3	143	48	341	193	193	156.923	No
390	TCF Lef FGF and LDN 1 drift corrected cropped.tif	3	144	51	339	193	193	153.388	No
391	TCF Lef FGF and LDN 1 drift corrected cropped.tif	3	145	51	340	193	193	153.769	No
392	TCF Lef FGF and LDN 1 drift corrected cropped.tif	3	146	53	340	193	193	151.924	No
393	TCF Lef FGF and LDN 1 drift corrected cropped.tif	3	147	48	342	193	193	157.309	No
394	TCF Lef FGF and LDN 1 drift corrected cropped.tif	3	148	42	339	193	193	161.756	No
395	TCF Lef FGF and LDN 1 drift corrected cropped.tif	3	149	43	339	193	193	160.823	No
396	TCF Lef FGF and LDN 1 drift corrected cropped.tif	3	150	45	339	193	193	158.959	No
397	TCF Lef FGF and LDN 1 drift corrected cropped.tif	3	151	45	337	193	193	158.24	No
398	TCF Lef FGF and LDN 1 drift corrected cropped.tif	3	152	50	334	193	193	152.506	No
399	TCF Lef FGF and LDN 1 drift corrected cropped.tif	3	153	59	334	193	193	144.101	No
400	TCF Lef FGF and LDN 1 drift corrected cropped.tif	3	154	56	331	193	193	145.839	No
401	TCF Lef FGF and LDN 1 drift corrected cropped.tif	3	155	52	330	193	193	149.272	No
402	TCF Lef FGF and LDN 1 drift corrected cropped.tif	3	156	52	330	193	193	149.272	No
403	TCF Lef FGF and LDN 1 drift corrected cropped.tif	3	157	53	330	193	193	148.327	No
404	TCF Lef FGF and LDN 1 drift corrected cropped.tif	3	158	52	333	193	193	150.283	No
405	TCF Lef FGF and LDN 1 drift corrected cropped.tif	3	159	46	333	193	193	155.926	No
406	TCF Lef FGF and LDN 1 drift corrected cropped.tif	3	160	48	333	193	193	154.042	No
407	TCF Lef FGF and LDN 1 drift corrected cropped.tif	3	161	48	333	193	193	154.042	No
408	TCF Lef FGF and LDN 1 drift corrected cropped.tif	3	162	48	336	193	193	155.081	No
409	TCF Lef FGF and LDN 1 drift corrected cropped.tif	3	163	50	332	193	193	151.822	No
410	TCF Lef FGF and LDN 1 drift corrected cropped.tif	3	164	53	331	193	193	148.661	No
411	TCF Lef FGF and LDN 1 drift corrected cropped.tif	3	165	53	332	193	193	149	No
412	TCF Lef FGF and LDN 1 drift corrected cropped.tif	3	166	53	332	193	193	149	No
413	TCF Lef FGF and LDN 1 drift corrected cropped.tif	3	167	54	334	193	193	148.762	No
414	TCF Lef FGF and LDN 1 drift corrected cropped.tif	3	168	55	334	193	193	147.828	No
415	TCF Lef FGF and LDN 1 drift corrected cropped.tif	3	169	55	334	193	193	147.828	No
416	TCF Lef FGF and LDN 1 drift corrected cropped.tif	3	170	56	334	193	193	146.894	No
417	TCF Lef FGF and LDN 1 drift corrected cropped.tif	3	171	57	331	193	193	144.9	No
418	TCF Lef FGF and LDN 1 drift corrected cropped.tif	3	172	65	332	193	193	137.786	No
419	TCF Lef FGF and LDN 1 drift corrected cropped.tif	3	173	67	333	193	193	136.309	No
420	TCF Lef FGF and LDN 1 drift corrected cropped.tif	3	174	70	337	193	193	135.148	No
421	TCF Lef FGF and LDN 1 drift corrected cropped.tif	3	175	67	336	193	193	137.481	No
422	TCF Lef FGF and LDN 1 drift corrected cropped.tif	3	176	67	333	193	193	136.309	No
423	TCF Lef FGF and LDN 1 drift corrected cropped.tif	3	177	65	333	193	193	138.159	No
424	TCF Lef FGF and LDN 1 drift corrected cropped.tif	3	178	65	333	193	193	138.159	No
425	TCF Lef FGF and LDN 1 drift corrected cropped.tif	3	179	65	333	193	193	138.159	No
426	TCF Lef FGF and LDN 1 drift corrected cropped.tif	3	180	60	330	193	193	141.739	No
427	TCF Lef FGF and LDN 1 drift corrected cropped.tif	3	181	60	330	193	193	141.739	No
428	TCF Lef FGF and LDN 1 drift corrected cropped.tif	3	182	60	326	193	193	140.407	No
429	TCF Lef FGF and LDN 1 drift corrected cropped.tif	3	183	60	326	193	193	140.407	No
430	TCF Lef FGF and LDN 1 drift corrected cropped.tif	3	184	60	326	193	193	140.407	No
431	TCF Lef FGF and LDN 1 drift corrected cropped.tif	3	185	60	326	193	193	140.407	No
432	TCF Lef FGF and LDN 1 drift corrected cropped.tif	3	186	60	326	193	193	140.407	No
433	TCF Lef FGF and LDN 1 drift corrected cropped.tif	3	187	64	326	193	193	136.624	No
434	TCF Lef FGF and LDN 1 drift corrected cropped.tif	3	188	66	328	193	193	135.418	No
435	TCF Lef FGF and LDN 1 drift corrected cropped.tif	3	189	67	328	193	193	134.481	No
436	TCF Lef FGF and LDN 1 drift corrected cropped.tif	3	190	65	326	193	193	135.68	No
437	TCF Lef FGF and LDN 1 drift corrected cropped.tif	3	191	67	327	193	193	134.134	No
438	TCF Lef FGF and LDN 1 drift corrected cropped.tif	3	192	67	326	193	193	133.795	No
439	TCF Lef FGF and LDN 1 drift corrected cropped.tif	3	193	65	325	193	193	135.351	No
440	TCF Lef FGF and LDN 1 drift corrected cropped.tif	3	194	67	325	193	193	133.462	No
441	TCF Lef FGF and LDN 1 drift corrected cropped.tif	3	195	67	325	193	193	133.462	No
442	TCF Lef FGF and LDN 1 drift corrected cropped.tif	3	196	66	325	193	193	134.406	No
443	TCF Lef FGF and LDN 1 drift corrected cropped.tif	3	197	64	322	193	193	135.359	No
444	TCF Lef FGF and LDN 1 drift corrected cropped.tif	3	198	66	322	193	193	133.454	No
445	TCF Lef FGF and LDN 1 drift corrected cropped.tif	3	199	67	325	193	193	133.462	No
446	TCF Lef FGF and LDN 1 drift corrected cropped.tif	3	200	70	326	193	193	130.973	No
447	TCF Lef FGF and LDN 1 drift corrected cropped.tif	3	201	69	326	193	193	131.913	No
448	TCF Lef FGF and LDN 1 drift corrected cropped.tif	3	202	69	326	193	193	131.913	No
449	TCF Lef FGF and LDN 1 drift corrected cropped.tif	3	203	67	328	193	193	134.481	No
450	TCF Lef FGF and LDN 1 drift corrected cropped.tif	3	204	66	330	193	193	136.125	No
451	TCF Lef FGF and LDN 1 drift corrected cropped.tif	3	205	68	330	193	193	134.261	No
452	TCF Lef FGF and LDN 1 drift corrected cropped.tif	3	206	70	330	193	193	132.401	No
453	TCF Lef FGF and LDN 1 drift corrected cropped.tif	3	207	75	336	193	193	130.188	No
454	TCF Lef FGF and LDN 1 drift corrected cropped.tif	3	208	75	333	193	193	128.95	No
455	TCF Lef FGF and LDN 1 drift corrected cropped.tif	3	209	75	335	193	193	129.769	No
456	TCF Lef FGF and LDN 1 drift corrected cropped.tif	3	210	74	336	193	193	131.095	No
457	TCF Lef FGF and LDN 1 drift corrected cropped.tif	3	211	73	336	193	193	132.004	No
458	TCF Lef FGF and LDN 1 drift corrected cropped.tif	3	212	76	337	193	193	129.711	No
459	TCF Lef FGF and LDN 1 drift corrected cropped.tif	3	213	77	342	193	193	131.061	No
460	TCF Lef FGF and LDN 1 drift corrected cropped.tif	3	214	78	343	193	193	130.648	No
461	TCF Lef FGF and LDN 1 drift corrected cropped.tif	3	215	80	345	193	193	129.865	No
462	TCF Lef FGF and LDN 1 drift corrected cropped.tif	3	216	80	345	193	193	129.865	No
463	TCF Lef FGF and LDN 1 drift corrected cropped.tif	3	217	80	345	193	193	129.865	No
464	TCF Lef FGF and LDN 1 drift corrected cropped.tif	3	218	81	347	193	193	130	No
465	TCF Lef FGF and LDN 1 drift corrected cropped.tif	3	219	80	344	193	193	129.375	No
466	TCF Lef FGF and LDN 1 drift corrected cropped.tif	3	220	80	345	193	193	129.865	No
467	TCF Lef FGF and LDN 1 drift corrected cropped.tif	3	221	80	345	193	193	129.865	No
468	TCF Lef FGF and LDN 1 drift corrected cropped.tif	3	222	80	345	193	193	129.865	No
469	TCF Lef FGF and LDN 1 drift corrected cropped.tif	3	223	82	343	193	193	127.142	No
470	TCF Lef FGF and LDN 1 drift corrected cropped.tif	3	224	82	342	193	193	126.657	No
471	TCF Lef FGF and LDN 1 drift corrected cropped.tif	3	225	80	342	193	193	128.413	No
472	TCF Lef FGF and LDN 1 drift corrected cropped.tif	3	226	83	344	193	193	126.764	No
473	TCF Lef FGF and LDN 1 drift corrected cropped.tif	3	227	82	344	193	193	127.632	No
474	TCF Lef FGF and LDN 1 drift corrected cropped.tif	3	228	82	342	193	193	126.657	No
475	TCF Lef FGF and LDN 1 drift corrected cropped.tif	3	229	79	342	193	193	129.294	No
476	TCF Lef FGF and LDN 1 drift corrected cropped.tif	3	230	81	343	193	193	128.016	No
477	TCF Lef FGF and LDN 1 drift corrected cropped.tif	3	231	80	343	193	193	128.891	No
478	TCF Lef FGF and LDN 1 drift corrected cropped.tif	3	232	82	344	193	193	127.632	No
479	TCF Lef FGF and LDN 1 drift corrected cropped.tif	3	233	82	342	193	193	126.657	No
480	TCF Lef FGF and LDN 1 drift corrected cropped.tif	3	234	82	340	193	193	125.706	No
481	TCF Lef FGF and LDN 1 drift corrected cropped.tif	3	235	80	341	193	193	127.941	No
482	TCF Lef FGF and LDN 1 drift corrected cropped.tif	3	236	81	340	193	193	126.59	No
483	TCF Lef FGF and LDN 1 drift corrected cropped.tif	4	1	48	84	139	139	95.5092	No
484	TCF Lef FGF and LDN 1 drift corrected cropped.tif	4	2	49	84	139	139	94.5569	No
485	TCF Lef FGF and LDN 1 drift corrected cropped.tif	4	3	49	84	139	139	94.5569	No
486	TCF Lef FGF and LDN 1 drift corrected cropped.tif	4	4	50	84	139	139	93.6056	No
487	TCF Lef FGF and LDN 1 drift corrected cropped.tif	4	5	50	83	139	139	93.9202	No
488	TCF Lef FGF and LDN 1 drift corrected cropped.tif	4	6	50	83	139	139	93.9202	No
489	TCF Lef FGF and LDN 1 drift corrected cropped.tif	4	7	50	83	139	139	93.9202	No
490	TCF Lef FGF and LDN 1 drift corrected cropped.tif	4	8	50	87	139	139	92.72	No
491	TCF Lef FGF and LDN 1 drift corrected cropped.tif	4	9	48	89	139	139	94.1116	No
492	TCF Lef FGF and LDN 1 drift corrected cropped.tif	4	10	48	89	139	139	94.1116	No
493	TCF Lef FGF and LDN 1 drift corrected cropped.tif	4	11	48	88	139	139	94.3716	No
494	TCF Lef FGF and LDN 1 drift corrected cropped.tif	4	12	44	87	139	139	98.4937	No
495	TCF Lef FGF and LDN 1 drift corrected cropped.tif	4	13	48	86	139	139	94.921	No
496	TCF Lef FGF and LDN 1 drift corrected cropped.tif	4	14	50	87	139	139	92.72	No
497	TCF Lef FGF and LDN 1 drift corrected cropped.tif	4	15	49	87	139	139	93.6803	No
498	TCF Lef FGF and LDN 1 drift corrected cropped.tif	4	16	49	87	139	139	93.6803	No
499	TCF Lef FGF and LDN 1 drift corrected cropped.tif	4	17	49	84	139	139	94.5569	No
500	TCF Lef FGF and LDN 1 drift corrected cropped.tif	4	18	49	84	139	139	94.5569	No
501	TCF Lef FGF and LDN 1 drift corrected cropped.tif	4	19	47	85	139	139	96.1665	No
502	TCF Lef FGF and LDN 1 drift corrected cropped.tif	4	20	47	86	139	139	95.8801	No
503	TCF Lef FGF and LDN 1 drift corrected cropped.tif	4	21	48	84	139	139	95.5092	No
504	TCF Lef FGF and LDN 1 drift corrected cropped.tif	4	22	44	81	139	139	100.245	No
505	TCF Lef FGF and LDN 1 drift corrected cropped.tif	4	23	45	82	139	139	98.9798	No
506	TCF Lef FGF and LDN 1 drift corrected cropped.tif	4	24	45	84	139	139	98.3717	No
507	TCF Lef FGF and LDN 1 drift corrected cropped.tif	4	25	45	84	139	139	98.3717	No
508	TCF Lef FGF and LDN 1 drift corrected cropped.tif	4	26	45	82	139	139	98.9798	No
509	TCF Lef FGF and LDN 1 drift corrected cropped.tif	4	27	44	86	139	139	98.7623	No
510	TCF Lef FGF and LDN 1 drift corrected cropped.tif	4	28	45	87	139	139	97.5295	No
511	TCF Lef FGF and LDN 1 drift corrected cropped.tif	4	29	46	90	139	139	95.8019	No
512	TCF Lef FGF and LDN 1 drift corrected cropped.tif	4	30	46	87	139	139	96.566	No
513	TCF Lef FGF and LDN 1 drift corrected cropped.tif	4	31	45	87	139	139	97.5295	No
514	TCF Lef FGF and LDN 1 drift corrected cropped.tif	4	32	45	87	139	139	97.5295	No
515	TCF Lef FGF and LDN 1 drift corrected cropped.tif	4	33	45	88	139	139	97.2677	No
516	TCF Lef FGF and LDN 1 drift corrected cropped.tif	4	34	45	88	139	139	97.2677	No
517	TCF Lef FGF and LDN 1 drift corrected cropped.tif	4	35	46	88	139	139	96.3016	No
518	TCF Lef FGF and LDN 1 drift corrected cropped.tif	4	36	47	90	139	139	94.8314	No
519	TCF Lef FGF and LDN 1 drift corrected cropped.tif	4	37	47	90	139	139	94.8314	No
520	TCF Lef FGF and LDN 1 drift corrected cropped.tif	4	38	46	91	139	139	95.5667	No
521	TCF Lef FGF and LDN 1 drift corrected cropped.tif	4	39	45	90	139	139	96.7729	No
522	TCF Lef FGF and LDN 1 drift corrected cropped.tif	4	40	47	91	139	139	94.5939	No
523	TCF Lef FGF and LDN 1 drift corrected cropped.tif	4	41	47	91	139	139	94.5939	No
524	TCF Lef FGF and LDN 1 drift corrected cropped.tif	4	42	47	91	139	139	94.5939	No
525	TCF Lef FGF and LDN 1 drift corrected cropped.tif	4	43	47	91	139	139	94.5939	No
526	TCF Lef FGF and LDN 1 drift corrected cropped.tif	4	44	47	91	139	139	94.5939	No
527	TCF Lef FGF and LDN 1 drift corrected cropped.tif	4	45	46	91	139	139	95.5667	No
528	TCF Lef FGF and LDN 1 drift corrected cropped.tif	4	46	46	91	139	139	95.5667	No
529	TCF Lef FGF and LDN 1 drift corrected cropped.tif	4	47	45	90	139	139	96.7729	No
530	TCF Lef FGF and LDN 1 drift corrected cropped.tif	4	48	45	90	139	139	96.7729	No
531	TCF Lef FGF and LDN 1 drift corrected cropped.tif	4	49	45	90	139	139	96.7729	No
532	TCF Lef FGF and LDN 1 drift corrected cropped.tif	4	50	45	90	139	139	96.7729	No
533	TCF Lef FGF and LDN 1 drift corrected cropped.tif	4	51	45	90	139	139	96.7729	No
534	TCF Lef FGF and LDN 1 drift corrected cropped.tif	4	52	45	89	139	139	97.0155	No
535	TCF Lef FGF and LDN 1 drift corrected cropped.tif	4	53	45	89	139	139	97.0155	No
536	TCF Lef FGF and LDN 1 drift corrected cropped.tif	4	54	45	89	139	139	97.0155	No
537	TCF Lef FGF and LDN 1 drift corrected cropped.tif	4	55	44	88	139	139	98.2344	No
538	TCF Lef FGF and LDN 1 drift corrected cropped.tif	4	56	44	88	139	139	98.2344	No
539	TCF Lef FGF and LDN 1 drift corrected cropped.tif	4	57	44	88	139	139	98.2344	No
540	TCF Lef FGF and LDN 1 drift corrected cropped.tif	4	58	40	88	139	139	102.108	No
541	TCF Lef FGF and LDN 1 drift corrected cropped.tif	4	59	39	87	139	139	103.325	No
542	TCF Lef FGF and LDN 1 drift corrected cropped.tif	4	60	40	87	139	139	102.357	No
543	TCF Lef FGF and LDN 1 drift corrected cropped.tif	4	61	42	87	139	139	100.424	No
544	TCF Lef FGF and LDN 1 drift corrected cropped.tif	4	62	42	87	139	139	100.424	No
545	TCF Lef FGF and LDN 1 drift corrected cropped.tif	4	63	42	87	139	139	100.424	No
546	TCF Lef FGF and LDN 1 drift corrected cropped.tif	4	64	42	87	139	139	100.424	No
547	TCF Lef FGF and LDN 1 drift corrected cropped.tif	4	65	39	87	139	139	103.325	No
548	TCF Lef FGF and LDN 1 drift corrected cropped.tif	4	66	43	88	139	139	99.2018	No
549	TCF Lef FGF and LDN 1 drift corrected cropped.tif	4	67	40	89	139	139	101.868	No
550	TCF Lef FGF and LDN 1 drift corrected cropped.tif	4	68	41	89	139	139	100.896	No
551	TCF Lef FGF and LDN 1 drift corrected cropped.tif	4	69	40	89	139	139	101.868	No
552	TCF Lef FGF and LDN 1 drift corrected cropped.tif	4	70	39	90	139	139	102.611	No
553	TCF Lef FGF and LDN 1 drift corrected cropped.tif	4	71	40	90	139	139	101.637	No
554	TCF Lef FGF and LDN 1 drift corrected cropped.tif	4	72	42	90	139	139	99.6895	No
555	TCF Lef FGF and LDN 1 drift corrected cropped.tif	4	73	42	90	139	139	99.6895	No
556	TCF Lef FGF and LDN 1 drift corrected cropped.tif	4	74	42	91	139	139	99.4636	No
557	TCF Lef FGF and LDN 1 drift corrected cropped.tif	4	75	42	90	139	139	99.6895	No
558	TCF Lef FGF and LDN 1 drift corrected cropped.tif	4	76	42	90	139	139	99.6895	No
559	TCF Lef FGF and LDN 1 drift corrected cropped.tif	4	77	42	90	139	139	99.6895	No
560	TCF Lef FGF and LDN 1 drift corrected cropped.tif	4	78	39	90	139	139	102.611	No
561	TCF Lef FGF and LDN 1 drift corrected cropped.tif	4	79	39	90	139	139	102.611	No
562	TCF Lef FGF and LDN 1 drift corrected cropped.tif	4	80	42	87	139	139	100.424	No
563	TCF Lef FGF and LDN 1 drift corrected cropped.tif	4	81	42	84	139	139	101.242	No
564	TCF Lef FGF and LDN 1 drift corrected cropped.tif	4	82	42	84	139	139	101.242	No
565	TCF Lef FGF and LDN 1 drift corrected cropped.tif	4	83	44	82	139	139	99.93	No
566	TCF Lef FGF and LDN 1 drift corrected cropped.tif	4	84	48	80	139	139	96.7988	No
567	TCF Lef FGF and LDN 1 drift corrected cropped.tif	4	85	46	80	139	139	98.6813	No
568	TCF Lef FGF and LDN 1 drift corrected cropped.tif	4	86	45	81	139	139	99.2975	No
569	TCF Lef FGF and LDN 1 drift corrected cropped.tif	4	87	45	81	139	139	99.2975	No
570	TCF Lef FGF and LDN 1 drift corrected cropped.tif	4	88	45	81	139	139	99.2975	No
571	TCF Lef FGF and LDN 1 drift corrected cropped.tif	4	89	45	81	139	139	99.2975	No
572	TCF Lef FGF and LDN 1 drift corrected cropped.tif	4	90	45	81	139	139	99.2975	No
573	TCF Lef FGF and LDN 1 drift corrected cropped.tif	4	91	45	80	139	139	99.6243	No
574	TCF Lef FGF and LDN 1 drift corrected cropped.tif	4	92	48	76	139	139	98.2344	No
575	TCF Lef FGF and LDN 1 drift corrected cropped.tif	4	93	48	76	139	139	98.2344	No
576	TCF Lef FGF and LDN 1 drift corrected cropped.tif	4	94	48	74	139	139	99.0051	No
577	TCF Lef FGF and LDN 1 drift corrected cropped.tif	4	95	48	73	139	139	99.4032	No
578	TCF Lef FGF and LDN 1 drift corrected cropped.tif	4	96	49	73	139	139	98.4886	No
579	TCF Lef FGF and LDN 1 drift corrected cropped.tif	4	97	48	74	139	139	99.0051	No
580	TCF Lef FGF and LDN 1 drift corrected cropped.tif	4	98	48	74	139	139	99.0051	No
581	TCF Lef FGF and LDN 1 drift corrected cropped.tif	4	99	49	74	139	139	98.0867	No
582	TCF Lef FGF and LDN 1 drift corrected cropped.tif	4	100	49	74	139	139	98.0867	No
583	TCF Lef FGF and LDN 1 drift corrected cropped.tif	4	101	50	74	139	139	97.17	No
584	TCF Lef FGF and LDN 1 drift corrected cropped.tif	4	102	50	75	139	139	96.7729	No
585	TCF Lef FGF and LDN 1 drift corrected cropped.tif	4	103	50	75	139	139	96.7729	No
586	TCF Lef FGF and LDN 1 drift corrected cropped.tif	4	104	50	75	139	139	96.7729	No
587	TCF Lef FGF and LDN 1 drift corrected cropped.tif	4	105	50	75	139	139	96.7729	No
588	TCF Lef FGF and LDN 1 drift corrected cropped.tif	4	106	50	75	139	139	96.7729	No
589	TCF Lef FGF and LDN 1 drift corrected cropped.tif	4	107	51	75	139	139	95.8541	No
590	TCF Lef FGF and LDN 1 drift corrected cropped.tif	4	108	51	76	139	139	95.462	No
591	TCF Lef FGF and LDN 1 drift corrected cropped.tif	4	109	50	77	139	139	96.0052	No
592	TCF Lef FGF and LDN 1 drift corrected cropped.tif	4	110	50	77	139	139	96.0052	No
593	TCF Lef FGF and LDN 1 drift corrected cropped.tif	4	111	50	79	139	139	95.2733	No
594	TCF Lef FGF and LDN 1 drift corrected cropped.tif	4	112	50	78	139	139	95.6347	No
595	TCF Lef FGF and LDN 1 drift corrected cropped.tif	4	113	51	78	139	139	94.7048	No
596	TCF Lef FGF and LDN 1 drift corrected cropped.tif	4	114	51	80	139	139	93.984	No
597	TCF Lef FGF and LDN 1 drift corrected cropped.tif	4	115	53	79	139	139	92.477	No
598	TCF Lef FGF and LDN 1 drift corrected cropped.tif	4	116	53	79	139	139	92.477	No
599	TCF Lef FGF and LDN 1 drift corrected cropped.tif	4	117	54	82	139	139	90.4765	No
600	TCF Lef FGF and LDN 1 drift corrected cropped.tif	4	118	54	83	139	139	90.1388	No
601	TCF Lef FGF and LDN 1 drift corrected cropped.tif	4	119	54	87	139	139	88.8876	No
602	TCF Lef FGF and LDN 1 drift corrected cropped.tif	4	120	54	89	139	139	88.3233	No
603	TCF Lef FGF and LDN 1 drift corrected cropped.tif	4	121	54	88	139	139	88.6002	No
604	TCF Lef FGF and LDN 1 drift corrected cropped.tif	4	122	55	91	139	139	86.8332	No
605	TCF Lef FGF and LDN 1 drift corrected cropped.tif	4	123	55	92	139	139	86.5852	No
606	TCF Lef FGF and LDN 1 drift corrected cropped.tif	4	124	55	92	139	139	86.5852	No
607	TCF Lef FGF and LDN 1 drift corrected cropped.tif	4	125	53	92	139	139	88.5268	No
608	TCF Lef FGF and LDN 1 drift corrected cropped.tif	4	126	53	90	139	139	89.0225	No
609	TCF Lef FGF and LDN 1 drift corrected cropped.tif	4	127	53	88	139	139	89.56	No
610	TCF Lef FGF and LDN 1 drift corrected cropped.tif	4	128	53	89	139	139	89.2861	No
611	TCF Lef FGF and LDN 1 drift corrected cropped.tif	4	129	53	89	139	139	89.2861	No
612	TCF Lef FGF and LDN 1 drift corrected cropped.tif	4	130	54	93	139	139	87.3212	No
613	TCF Lef FGF and LDN 1 drift corrected cropped.tif	4	131	55	95	139	139	85.9069	No
614	TCF Lef FGF and LDN 1 drift corrected cropped.tif	4	132	56	95	139	139	84.9294	No
615	TCF Lef FGF and LDN 1 drift corrected cropped.tif	4	133	55	93	139	139	86.3481	No
616	TCF Lef FGF and LDN 1 drift corrected cropped.tif	4	134	55	94	139	139	86.122	No
617	TCF Lef FGF and LDN 1 drift corrected cropped.tif	4	135	56	95	139	139	84.9294	No
618	TCF Lef FGF and LDN 1 drift corrected cropped.tif	4	136	53	95	139	139	87.8635	No
619	TCF Lef FGF and LDN 1 drift corrected cropped.tif	4	137	53	95	139	139	87.8635	No
620	TCF Lef FGF and LDN 1 drift corrected cropped.tif	4	138	54	99	139	139	86.1452	No
621	TCF Lef FGF and LDN 1 drift corrected cropped.tif	4	139	54	102	139	139	85.7088	No
622	TCF Lef FGF and LDN 1 drift corrected cropped.tif	4	140	54	103	139	139	85.5862	No
623	TCF Lef FGF and LDN 1 drift corrected cropped.tif	4	141	55	104	139	139	84.4808	No
624	TCF Lef FGF and LDN 1 drift corrected cropped.tif	4	142	59	106	132	132	80.1124	No
625	TCF Lef FGF and LDN 1 drift corrected cropped.tif	4	143	59	106	132	132	80.1124	No
626	TCF Lef FGF and LDN 1 drift corrected cropped.tif	4	144	62	113	132	132	74.6726	No
627	TCF Lef FGF and LDN 1 drift corrected cropped.tif	4	145	63	113	132	132	73.736	No
628	TCF Lef FGF and LDN 1 drift corrected cropped.tif	4	146	63	113	132	132	73.736	No
629	TCF Lef FGF and LDN 1 drift corrected cropped.tif	4	147	61	112	132	132	75.9605	No
630	TCF Lef FGF and LDN 1 drift corrected cropped.tif	4	148	61	107	132	132	77.8781	No
631	TCF Lef FGF and LDN 1 drift corrected cropped.tif	4	149	61	107	132	132	77.8781	No
632	TCF Lef FGF and LDN 1 drift corrected cropped.tif	4	150	61	107	132	132	77.8781	No
633	TCF Lef FGF and LDN 1 drift corrected cropped.tif	4	151	62	106	139	139	77.3175	No
634	TCF Lef FGF and LDN 1 drift corrected cropped.tif	4	152	62	103	139	139	77.6466	No
635	TCF Lef FGF and LDN 1 drift corrected cropped.tif	4	153	61	107	132	132	77.8781	No
636	TCF Lef FGF and LDN 1 drift corrected cropped.tif	4	154	61	107	132	132	77.8781	No
637	TCF Lef FGF and LDN 1 drift corrected cropped.tif	4	155	62	107	132	132	76.9675	No
638	TCF Lef FGF and LDN 1 drift corrected cropped.tif	4	156	65	104	139	139	74.5453	No
639	TCF Lef FGF and LDN 1 drift corrected cropped.tif	4	157	65	104	139	139	74.5453	No
640	TCF Lef FGF and LDN 1 drift corrected cropped.tif	4	158	64	102	139	139	75.8024	No
641	TCF Lef FGF and LDN 1 drift corrected cropped.tif	4	159	62	104	139	139	77.5242	No
642	TCF Lef FGF and LDN 1 drift corrected cropped.tif	4	160	62	104	139	139	77.5242	No
643	TCF Lef FGF and LDN 1 drift corrected cropped.tif	4	161	64	104	139	139	75.5381	No
644	TCF Lef FGF and LDN 1 drift corrected cropped.tif	4	162	63	102	139	139	76.7919	No
645	TCF Lef FGF and LDN 1 drift corrected cropped.tif	4	163	63	102	139	139	76.7919	No
646	TCF Lef FGF and LDN 1 drift corrected cropped.tif	4	164	62	101	139	139	77.9295	No
647	TCF Lef FGF and LDN 1 drift corrected cropped.tif	4	165	63	103	139	139	76.6551	No
648	TCF Lef FGF and LDN 1 drift corrected cropped.tif	4	166	63	103	139	139	76.6551	No
649	TCF Lef FGF and LDN 1 drift corrected cropped.tif	4	167	63	105	139	139	76.4199	No
650	TCF Lef FGF and LDN 1 drift corrected cropped.tif	4	168	61	104	139	139	78.5175	No
651	TCF Lef FGF and LDN 1 drift corrected cropped.tif	4	169	62	104	139	139	77.5242	No
652	TCF Lef FGF and LDN 1 drift corrected cropped.tif	4	170	62	104	139	139	77.5242	No
653	TCF Lef FGF and LDN 1 drift corrected cropped.tif	4	171	62	104	139	139	77.5242	No
654	TCF Lef FGF and LDN 1 drift corrected cropped.tif	4	172	61	104	139	139	78.5175	No
655	TCF Lef FGF and LDN 1 drift corrected cropped.tif	4	173	61	104	139	139	78.5175	No
656	TCF Lef FGF and LDN 1 drift corrected cropped.tif	4	174	60	104	139	139	79.511	No
657	TCF Lef FGF and LDN 1 drift corrected cropped.tif	4	175	60	103	139	139	79.6304	No
658	TCF Lef FGF and LDN 1 drift corrected cropped.tif	4	176	62	101	139	139	77.9295	No
659	TCF Lef FGF and LDN 1 drift corrected cropped.tif	4	177	62	101	139	139	77.9295	No
660	TCF Lef FGF and LDN 1 drift corrected cropped.tif	4	178	62	102	139	139	77.7817	No
661	TCF Lef FGF and LDN 1 drift corrected cropped.tif	4	179	62	101	139	139	77.9295	No
662	TCF Lef FGF and LDN 1 drift corrected cropped.tif	4	180	62	101	139	139	77.9295	No
663	TCF Lef FGF and LDN 1 drift corrected cropped.tif	4	181	62	101	139	139	77.9295	No
664	TCF Lef FGF and LDN 1 drift corrected cropped.tif	4	182	60	100	139	139	80.0625	No
665	TCF Lef FGF and LDN 1 drift corrected cropped.tif	4	183	62	101	139	139	77.9295	No
666	TCF Lef FGF and LDN 1 drift corrected cropped.tif	4	184	65	104	139	139	74.5453	No
667	TCF Lef FGF and LDN 1 drift corrected cropped.tif	4	185	65	104	139	139	74.5453	No
668	TCF Lef FGF and LDN 1 drift corrected cropped.tif	4	186	63	104	139	139	76.531	No
669	TCF Lef FGF and LDN 1 drift corrected cropped.tif	4	187	62	104	139	139	77.5242	No
670	TCF Lef FGF and LDN 1 drift corrected cropped.tif	4	188	62	105	139	139	77.4145	No
671	TCF Lef FGF and LDN 1 drift corrected cropped.tif	4	189	62	105	139	139	77.4145	No
672	TCF Lef FGF and LDN 1 drift corrected cropped.tif	4	190	62	104	139	139	77.5242	No
673	TCF Lef FGF and LDN 1 drift corrected cropped.tif	4	191	67	104	139	139	72.5603	No
674	TCF Lef FGF and LDN 1 drift corrected cropped.tif	4	192	65	104	139	139	74.5453	No
675	TCF Lef FGF and LDN 1 drift corrected cropped.tif	4	193	65	104	139	139	74.5453	No
676	TCF Lef FGF and LDN 1 drift corrected cropped.tif	4	194	64	101	139	139	75.9539	No
677	TCF Lef FGF and LDN 1 drift corrected cropped.tif	4	195	64	101	139	139	75.9539	No
678	TCF Lef FGF and LDN 1 drift corrected cropped.tif	4	196	64	103	139	139	75.6637	No
679	TCF Lef FGF and LDN 1 drift corrected cropped.tif	4	197	64	102	139	139	75.8024	No
680	TCF Lef FGF and LDN 1 drift corrected cropped.tif	4	198	64	102	139	139	75.8024	No
681	TCF Lef FGF and LDN 1 drift corrected cropped.tif	4	199	64	101	139	139	75.9539	No
682	TCF Lef FGF and LDN 1 drift corrected cropped.tif	4	200	62	101	139	139	77.9295	No
683	TCF Lef FGF and LDN 1 drift corrected cropped.tif	4	201	65	101	139	139	74.9667	No
684	TCF Lef FGF and LDN 1 drift corrected cropped.tif	4	202	65	101	139	139	74.9667	No
685	TCF Lef FGF and LDN 1 drift corrected cropped.tif	4	203	64	104	139	139	75.5381	No
686	TCF Lef FGF and LDN 1 drift corrected cropped.tif	4	204	64	104	139	139	75.5381	No
687	TCF Lef FGF and LDN 1 drift corrected cropped.tif	4	205	65	104	139	139	74.5453	No
688	TCF Lef FGF and LDN 1 drift corrected cropped.tif	4	206	67	102	139	139	72.8354	No
689	TCF Lef FGF and LDN 1 drift corrected cropped.tif	4	207	67	104	139	139	72.5603	No
690	TCF Lef FGF and LDN 1 drift corrected cropped.tif	4	208	66	104	139	139	73.5527	No
691	TCF Lef FGF and LDN 1 drift corrected cropped.tif	4	209	66	104	139	139	73.5527	No
692	TCF Lef FGF and LDN 1 drift corrected cropped.tif	4	210	66	104	139	139	73.5527	No
693	TCF Lef FGF and LDN 1 drift corrected cropped.tif	4	211	66	104	139	139	73.5527	No
694	TCF Lef FGF and LDN 1 drift corrected cropped.tif	4	212	66	104	139	139	73.5527	No
695	TCF Lef FGF and LDN 1 drift corrected cropped.tif	4	213	66	104	139	139	73.5527	No
696	TCF Lef FGF and LDN 1 drift corrected cropped.tif	4	214	65	103	139	139	74.6726	No
697	TCF Lef FGF and LDN 1 drift corrected cropped.tif	4	215	67	103	139	139	72.6911	No
698	TCF Lef FGF and LDN 1 drift corrected cropped.tif	4	216	72	106	139	139	67.3647	No
699	TCF Lef FGF and LDN 1 drift corrected cropped.tif	4	217	70	105	139	139	69.4622	No
700	TCF Lef FGF and LDN 1 drift corrected cropped.tif	4	218	70	105	139	139	69.4622	No
701	TCF Lef FGF and LDN 1 drift corrected cropped.tif	4	219	73	107	139	139	66.2722	No
702	TCF Lef FGF and LDN 1 drift corrected cropped.tif	4	220	75	107	139	139	64.2806	No
703	TCF Lef FGF and LDN 1 drift corrected cropped.tif	4	221	75	107	139	139	64.2806	No
704	TCF Lef FGF and LDN 1 drift corrected cropped.tif	4	222	75	104	139	139	64.6297	No
705	TCF Lef FGF and LDN 1 drift corrected cropped.tif	4	223	75	104	139	139	64.6297	No
706	TCF Lef FGF and LDN 1 drift corrected cropped.tif	4	224	75	104	139	139	64.6297	No
707	TCF Lef FGF and LDN 1 drift corrected cropped.tif	4	225	75	107	139	139	64.2806	No
708	TCF Lef FGF and LDN 1 drift corrected cropped.tif	4	226	76	107	139	139	63.2851	No
709	TCF Lef FGF and LDN 1 drift corrected cropped.tif	4	227	76	109	139	139	63.1269	No
710	TCF Lef FGF and LDN 1 drift corrected cropped.tif	4	228	78	110	139	139	61.0737	No
711	TCF Lef FGF and LDN 1 drift corrected cropped.tif	4	229	76	108	139	139	63.1981	No
712	TCF Lef FGF and LDN 1 drift corrected cropped.tif	4	230	76	108	139	139	63.1981	No
713	TCF Lef FGF and LDN 1 drift corrected cropped.tif	4	231	77	110	139	139	62.0725	No
714	TCF Lef FGF and LDN 1 drift corrected cropped.tif	4	232	79	110	139	139	60.075	No
715	TCF Lef FGF and LDN 1 drift corrected cropped.tif	4	233	79	110	139	139	60.075	No
716	TCF Lef FGF and LDN 1 drift corrected cropped.tif	4	234	83	110	139	139	56.0803	No
717	TCF Lef FGF and LDN 1 drift corrected cropped.tif	4	235	82	107	139	139	57.3149	No
718	TCF Lef FGF and LDN 1 drift corrected cropped.tif	4	236	80	107	139	139	59.3043	No
719	TCF Lef FGF and LDN 1 drift corrected cropped.tif	4	236	82	107	139	139	57.3149	No
720	TCF Lef FGF and LDN 1 drift corrected cropped.tif	4	236	80	107	139	139	59.3043	No
721	TCF Lef FGF and LDN 1 drift corrected cropped.tif	5	1	375	231	247	247	147.353	No
722	TCF Lef FGF and LDN 1 drift corrected cropped.tif	5	2	373	234	247	247	144.139	No
723	TCF Lef FGF and LDN 1 drift corrected cropped.tif	5	3	372	234	247	247	143.266	No
724	TCF Lef FGF and LDN 1 drift corrected cropped.tif	5	4	370	234	247	247	141.524	No
725	TCF Lef FGF and LDN 1 drift corrected cropped.tif	5	5	370	230	247	247	143.544	No
726	TCF Lef FGF and LDN 1 drift corrected cropped.tif	5	6	370	227	247	247	145.114	No
727	TCF Lef FGF and LDN 1 drift corrected cropped.tif	5	7	373	225	247	247	148.718	No
728	TCF Lef FGF and LDN 1 drift corrected cropped.tif	5	8	373	223	247	247	149.79	No
729	TCF Lef FGF and LDN 1 drift corrected cropped.tif	5	9	371	218	247	247	150.904	No
730	TCF Lef FGF and LDN 1 drift corrected cropped.tif	5	10	370	218	247	247	150.083	No
731	TCF Lef FGF and LDN 1 drift corrected cropped.tif	5	11	371	217	247	247	151.476	No
732	TCF Lef FGF and LDN 1 drift corrected cropped.tif	5	12	369	217	247	247	149.843	No
733	TCF Lef FGF and LDN 1 drift corrected cropped.tif	5	13	370	216	247	247	151.238	No
734	TCF Lef FGF and LDN 1 drift corrected cropped.tif	5	14	370	216	247	247	151.238	No
735	TCF Lef FGF and LDN 1 drift corrected cropped.tif	5	15	372	216	247	247	152.869	No
736	TCF Lef FGF and LDN 1 drift corrected cropped.tif	5	16	372	216	247	247	152.869	No
737	TCF Lef FGF and LDN 1 drift corrected cropped.tif	5	17	365	218	247	247	146.014	No
738	TCF Lef FGF and LDN 1 drift corrected cropped.tif	5	18	363	218	247	247	144.402	No
739	TCF Lef FGF and LDN 1 drift corrected cropped.tif	5	19	363	218	247	247	144.402	No
740	TCF Lef FGF and LDN 1 drift corrected cropped.tif	5	20	358	217	247	247	141.032	No
741	TCF Lef FGF and LDN 1 drift corrected cropped.tif	5	21	358	217	247	247	141.032	No
742	TCF Lef FGF and LDN 1 drift corrected cropped.tif	5	22	357	217	247	247	140.246	No
743	TCF Lef FGF and LDN 1 drift corrected cropped.tif	5	23	357	214	247	247	142.127	No
744	TCF Lef FGF and LDN 1 drift corrected cropped.tif	5	24	358	214	247	247	142.902	No
745	TCF Lef FGF and LDN 1 drift corrected cropped.tif	5	25	359	216	247	247	142.436	No
746	TCF Lef FGF and LDN 1 drift corrected cropped.tif	5	26	359	215	247	247	143.056	No
747	TCF Lef FGF and LDN 1 drift corrected cropped.tif	5	27	356	217	247	247	139.463	No
748	TCF Lef FGF and LDN 1 drift corrected cropped.tif	5	28	356	214	247	247	141.354	No
749	TCF Lef FGF and LDN 1 drift corrected cropped.tif	5	29	355	214	247	247	140.584	No
750	TCF Lef FGF and LDN 1 drift corrected cropped.tif	5	30	352	217	247	247	136.36	No
751	TCF Lef FGF and LDN 1 drift corrected cropped.tif	5	31	356	214	247	247	141.354	No
752	TCF Lef FGF and LDN 1 drift corrected cropped.tif	5	32	359	214	247	247	143.68	No
753	TCF Lef FGF and LDN 1 drift corrected cropped.tif	5	33	356	212	247	247	142.636	No
754	TCF Lef FGF and LDN 1 drift corrected cropped.tif	5	34	357	211	247	247	144.045	No
755	TCF Lef FGF and LDN 1 drift corrected cropped.tif	5	35	356	212	247	247	142.636	No
756	TCF Lef FGF and LDN 1 drift corrected cropped.tif	5	36	357	211	247	247	144.045	No
757	TCF Lef FGF and LDN 1 drift corrected cropped.tif	5	37	353	211	247	247	141.014	No
758	TCF Lef FGF and LDN 1 drift corrected cropped.tif	5	38	354	209	247	247	143.087	No
759	TCF Lef FGF and LDN 1 drift corrected cropped.tif	5	39	353	209	247	247	142.341	No
760	TCF Lef FGF and LDN 1 drift corrected cropped.tif	5	40	357	212	247	247	143.401	No
761	TCF Lef FGF and LDN 1 drift corrected cropped.tif	5	41	359	212	247	247	144.941	No
762	TCF Lef FGF and LDN 1 drift corrected cropped.tif	5	42	361	214	247	247	145.245	No
763	TCF Lef FGF and LDN 1 drift corrected cropped.tif	5	43	361	214	247	247	145.245	No
764	TCF Lef FGF and LDN 1 drift corrected cropped.tif	5	44	362	212	247	247	147.272	No
765	TCF Lef FGF and LDN 1 drift corrected cropped.tif	5	45	361	214	247	247	145.245	No
766	TCF Lef FGF and LDN 1 drift corrected cropped.tif	5	46	364	217	247	247	145.801	No
767	TCF Lef FGF and LDN 1 drift corrected cropped.tif	5	47	363	214	247	247	146.82	No
768	TCF Lef FGF and LDN 1 drift corrected cropped.tif	5	48	363	214	247	247	146.82	No
769	TCF Lef FGF and LDN 1 drift corrected cropped.tif	5	49	361	214	247	247	145.245	No
770	TCF Lef FGF and LDN 1 drift corrected cropped.tif	5	50	359	212	247	247	144.941	No
771	TCF Lef FGF and LDN 1 drift corrected cropped.tif	5	51	361	212	247	247	146.492	No
772	TCF Lef FGF and LDN 1 drift corrected cropped.tif	5	52	361	212	247	247	146.492	No
773	TCF Lef FGF and LDN 1 drift corrected cropped.tif	5	53	360	213	247	247	145.086	No
774	TCF Lef FGF and LDN 1 drift corrected cropped.tif	5	54	363	213	247	247	147.435	No
775	TCF Lef FGF and LDN 1 drift corrected cropped.tif	5	55	363	213	247	247	147.435	No
776	TCF Lef FGF and LDN 1 drift corrected cropped.tif	5	56	363	213	247	247	147.435	No
777	TCF Lef FGF and LDN 1 drift corrected cropped.tif	5	57	363	213	247	247	147.435	No
778	TCF Lef FGF and LDN 1 drift corrected cropped.tif	5	58	363	215	247	247	146.209	No
779	TCF Lef FGF and LDN 1 drift corrected cropped.tif	5	59	364	213	247	247	148.223	No
780	TCF Lef FGF and LDN 1 drift corrected cropped.tif	5	60	364	214	247	247	147.611	No
781	TCF Lef FGF and LDN 1 drift corrected cropped.tif	5	61	364	214	247	247	147.611	No
782	TCF Lef FGF and LDN 1 drift corrected cropped.tif	5	62	366	215	247	247	148.6	No
783	TCF Lef FGF and LDN 1 drift corrected cropped.tif	5	63	367	214	247	247	150	No
784	TCF Lef FGF and LDN 1 drift corrected cropped.tif	5	64	367	214	247	247	150	No
785	TCF Lef FGF and LDN 1 drift corrected cropped.tif	5	65	367	214	247	247	150	No
786	TCF Lef FGF and LDN 1 drift corrected cropped.tif	5	66	366	214	247	247	149.201	No
787	TCF Lef FGF and LDN 1 drift corrected cropped.tif	5	67	367	214	247	247	150	No
788	TCF Lef FGF and LDN 1 drift corrected cropped.tif	5	68	367	214	247	247	150	No
789	TCF Lef FGF and LDN 1 drift corrected cropped.tif	5	69	367	211	247	247	151.819	No
790	TCF Lef FGF and LDN 1 drift corrected cropped.tif	5	70	367	211	247	247	151.819	No
791	TCF Lef FGF and LDN 1 drift corrected cropped.tif	5	71	367	209	247	247	153.052	No
792	TCF Lef FGF and LDN 1 drift corrected cropped.tif	5	72	368	210	247	247	153.222	No
793	TCF Lef FGF and LDN 1 drift corrected cropped.tif	5	73	368	210	247	247	153.222	No
794	TCF Lef FGF and LDN 1 drift corrected cropped.tif	5	74	370	211	247	247	154.201	No
795	TCF Lef FGF and LDN 1 drift corrected cropped.tif	5	75	369	213	247	247	152.201	No
796	TCF Lef FGF and LDN 1 drift corrected cropped.tif	5	76	369	211	247	247	153.405	No
797	TCF Lef FGF and LDN 1 drift corrected cropped.tif	5	77	370	211	247	247	154.201	No
798	TCF Lef FGF and LDN 1 drift corrected cropped.tif	5	78	372	212	247	247	155.206	No
799	TCF Lef FGF and LDN 1 drift corrected cropped.tif	5	79	371	211	247	247	155	No
800	TCF Lef FGF and LDN 1 drift corrected cropped.tif	5	80	369	217	247	247	149.843	No
801	TCF Lef FGF and LDN 1 drift corrected cropped.tif	5	81	368	217	247	247	149.03	No
802	TCF Lef FGF and LDN 1 drift corrected cropped.tif	5	82	368	217	247	247	149.03	No
803	TCF Lef FGF and LDN 1 drift corrected cropped.tif	5	83	367	216	247	247	148.809	No
804	TCF Lef FGF and LDN 1 drift corrected cropped.tif	5	84	367	216	247	247	148.809	No
805	TCF Lef FGF and LDN 1 drift corrected cropped.tif	5	85	367	216	247	247	148.809	No
806	TCF Lef FGF and LDN 1 drift corrected cropped.tif	5	86	366	216	247	247	148.003	No
807	TCF Lef FGF and LDN 1 drift corrected cropped.tif	5	87	364	215	247	247	147.003	No
808	TCF Lef FGF and LDN 1 drift corrected cropped.tif	5	88	364	215	247	247	147.003	No
809	TCF Lef FGF and LDN 1 drift corrected cropped.tif	5	89	365	215	247	247	147.8	No
810	TCF Lef FGF and LDN 1 drift corrected cropped.tif	5	90	367	217	247	247	148.219	No
811	TCF Lef FGF and LDN 1 drift corrected cropped.tif	5	91	367	217	247	247	148.219	No
812	TCF Lef FGF and LDN 1 drift corrected cropped.tif	5	92	366	218	247	247	146.823	No
813	TCF Lef FGF and LDN 1 drift corrected cropped.tif	5	93	367	217	247	247	148.219	No
814	TCF Lef FGF and LDN 1 drift corrected cropped.tif	5	94	367	217	247	247	148.219	No
815	TCF Lef FGF and LDN 1 drift corrected cropped.tif	5	95	368	217	247	247	149.03	No
816	TCF Lef FGF and LDN 1 drift corrected cropped.tif	5	96	367	217	247	247	148.219	No
817	TCF Lef FGF and LDN 1 drift corrected cropped.tif	5	97	369	217	247	247	149.843	No
818	TCF Lef FGF and LDN 1 drift corrected cropped.tif	5	98	370	217	247	247	150.659	No
819	TCF Lef FGF and LDN 1 drift corrected cropped.tif	5	99	370	215	247	247	151.822	No
820	TCF Lef FGF and LDN 1 drift corrected cropped.tif	5	100	371	217	247	247	151.476	No
821	TCF Lef FGF and LDN 1 drift corrected cropped.tif	5	101	372	217	247	247	152.296	No
822	TCF Lef FGF and LDN 1 drift corrected cropped.tif	5	102	368	217	247	247	149.03	No
823	TCF Lef FGF and LDN 1 drift corrected cropped.tif	5	103	368	217	247	247	149.03	No
824	TCF Lef FGF and LDN 1 drift corrected cropped.tif	5	104	367	216	247	247	148.809	No
825	TCF Lef FGF and LDN 1 drift corrected cropped.tif	5	105	367	215	247	247	149.402	No
826	TCF Lef FGF and LDN 1 drift corrected cropped.tif	5	106	368	217	247	247	149.03	No
827	TCF Lef FGF and LDN 1 drift corrected cropped.tif	5	107	367	217	247	247	148.219	No
828	TCF Lef FGF and LDN 1 drift corrected cropped.tif	5	108	366	217	247	247	147.411	No
829	TCF Lef FGF and LDN 1 drift corrected cropped.tif	5	109	362	220	247	247	142.411	No
830	TCF Lef FGF and LDN 1 drift corrected cropped.tif	5	110	361	221	247	247	141.014	No
831	TCF Lef FGF and LDN 1 drift corrected cropped.tif	5	111	360	222	247	247	139.617	No
832	TCF Lef FGF and LDN 1 drift corrected cropped.tif	5	112	361	220	247	247	141.605	No
833	TCF Lef FGF and LDN 1 drift corrected cropped.tif	5	113	362	221	247	247	141.824	No
834	TCF Lef FGF and LDN 1 drift corrected cropped.tif	5	114	362	221	247	247	141.824	No
835	TCF Lef FGF and LDN 1 drift corrected cropped.tif	5	115	362	221	247	247	141.824	No
836	TCF Lef FGF and LDN 1 drift corrected cropped.tif	5	116	360	221	247	247	140.207	No
837	TCF Lef FGF and LDN 1 drift corrected cropped.tif	5	117	360	220	247	247	140.801	No
838	TCF Lef FGF and LDN 1 drift corrected cropped.tif	5	118	363	221	247	247	142.636	No
839	TCF Lef FGF and LDN 1 drift corrected cropped.tif	5	119	361	226	247	247	138.13	No
840	TCF Lef FGF and LDN 1 drift corrected cropped.tif	5	120	361	226	247	247	138.13	No
841	TCF Lef FGF and LDN 1 drift corrected cropped.tif	5	121	359	231	247	247	133.69	No
842	TCF Lef FGF and LDN 1 drift corrected cropped.tif	5	122	354	234	247	247	127.863	No
843	TCF Lef FGF and LDN 1 drift corrected cropped.tif	5	123	354	233	247	247	128.413	No
844	TCF Lef FGF and LDN 1 drift corrected cropped.tif	5	124	353	233	247	247	127.581	No
845	TCF Lef FGF and LDN 1 drift corrected cropped.tif	5	125	352	239	247	247	123.491	No
846	TCF Lef FGF and LDN 1 drift corrected cropped.tif	5	126	350	238	247	247	122.332	No
847	TCF Lef FGF and LDN 1 drift corrected cropped.tif	5	127	351	237	247	247	123.713	No
848	TCF Lef FGF and LDN 1 drift corrected cropped.tif	5	128	353	239	247	247	124.342	No
849	TCF Lef FGF and LDN 1 drift corrected cropped.tif	5	129	353	241	247	247	123.309	No
850	TCF Lef FGF and LDN 1 drift corrected cropped.tif	5	130	356	242	247	247	125.399	No
851	TCF Lef FGF and LDN 1 drift corrected cropped.tif	5	131	353	245	247	247	121.314	No
852	TCF Lef FGF and LDN 1 drift corrected cropped.tif	5	132	353	244	247	247	121.803	No
853	TCF Lef FGF and LDN 1 drift corrected cropped.tif	5	133	356	245	247	247	123.944	No
854	TCF Lef FGF and LDN 1 drift corrected cropped.tif	5	134	354	246	247	247	121.709	No
855	TCF Lef FGF and LDN 1 drift corrected cropped.tif	5	135	355	244	247	247	123.548	No
856	TCF Lef FGF and LDN 1 drift corrected cropped.tif	5	136	356	243	247	247	124.908	No
857	TCF Lef FGF and LDN 1 drift corrected cropped.tif	5	137	356	243	247	247	124.908	No
858	TCF Lef FGF and LDN 1 drift corrected cropped.tif	5	138	357	243	247	247	125.782	No
859	TCF Lef FGF and LDN 1 drift corrected cropped.tif	5	139	359	244	247	247	127.059	No
860	TCF Lef FGF and LDN 1 drift corrected cropped.tif	5	140	358	244	247	247	126.178	No
861	TCF Lef FGF and LDN 1 drift corrected cropped.tif	5	141	359	245	247	247	126.59	No
862	TCF Lef FGF and LDN 1 drift corrected cropped.tif	5	142	360	244	247	247	127.941	No
863	TCF Lef FGF and LDN 1 drift corrected cropped.tif	5	143	361	243	247	247	129.294	No
864	TCF Lef FGF and LDN 1 drift corrected cropped.tif	5	144	363	244	247	247	130.599	No
865	TCF Lef FGF and LDN 1 drift corrected cropped.tif	5	145	363	246	247	247	129.692	No
866	TCF Lef FGF and LDN 1 drift corrected cropped.tif	5	146	363	248	247	247	128.81	No
867	TCF Lef FGF and LDN 1 drift corrected cropped.tif	5	147	363	248	247	247	128.81	No
868	TCF Lef FGF and LDN 1 drift corrected cropped.tif	5	148	364	251	247	247	128.445	No
869	TCF Lef FGF and LDN 1 drift corrected cropped.tif	5	149	363	250	247	247	127.953	No
870	TCF Lef FGF and LDN 1 drift corrected cropped.tif	5	150	363	249	247	247	128.378	No
871	TCF Lef FGF and LDN 1 drift corrected cropped.tif	5	151	363	249	247	247	128.378	No
872	TCF Lef FGF and LDN 1 drift corrected cropped.tif	5	152	363	249	247	247	128.378	No
873	TCF Lef FGF and LDN 1 drift corrected cropped.tif	5	153	364	248	247	247	129.711	No
874	TCF Lef FGF and LDN 1 drift corrected cropped.tif	5	154	364	251	247	247	128.445	No
875	TCF Lef FGF and LDN 1 drift corrected cropped.tif	5	155	360	251	247	247	124.812	No
876	TCF Lef FGF and LDN 1 drift corrected cropped.tif	5	156	359	251	247	247	123.907	No
877	TCF Lef FGF and LDN 1 drift corrected cropped.tif	5	157	357	251	247	247	122.102	No
878	TCF Lef FGF and LDN 1 drift corrected cropped.tif	5	158	355	254	247	247	119.013	No
879	TCF Lef FGF and LDN 1 drift corrected cropped.tif	5	159	357	254	247	247	120.831	No
880	TCF Lef FGF and LDN 1 drift corrected cropped.tif	5	160	354	255	247	247	117.686	No
881	TCF Lef FGF and LDN 1 drift corrected cropped.tif	5	161	352	255	247	247	115.871	No
882	TCF Lef FGF and LDN 1 drift corrected cropped.tif	5	162	350	254	247	247	114.495	No
883	TCF Lef FGF and LDN 1 drift corrected cropped.tif	5	163	351	254	247	247	115.395	No
884	TCF Lef FGF and LDN 1 drift corrected cropped.tif	5	164	353	254	247	247	117.201	No
885	TCF Lef FGF and LDN 1 drift corrected cropped.tif	5	165	353	257	247	247	115.953	No
886	TCF Lef FGF and LDN 1 drift corrected cropped.tif	5	166	352	257	247	247	115.039	No
887	TCF Lef FGF and LDN 1 drift corrected cropped.tif	5	167	352	257	247	247	115.039	No
888	TCF Lef FGF and LDN 1 drift corrected cropped.tif	5	168	350	257	247	247	113.217	No
889	TCF Lef FGF and LDN 1 drift corrected cropped.tif	5	169	350	257	247	247	113.217	No
890	TCF Lef FGF and LDN 1 drift corrected cropped.tif	5	170	350	257	247	247	113.217	No
891	TCF Lef FGF and LDN 1 drift corrected cropped.tif	5	171	349	257	247	247	112.308	No
892	TCF Lef FGF and LDN 1 drift corrected cropped.tif	5	172	349	257	247	247	112.308	No
893	TCF Lef FGF and LDN 1 drift corrected cropped.tif	5	173	349	257	247	247	112.308	No
894	TCF Lef FGF and LDN 1 drift corrected cropped.tif	5	174	349	258	247	247	111.893	No
895	TCF Lef FGF and LDN 1 drift corrected cropped.tif	5	175	348	259	247	247	110.571	No
896	TCF Lef FGF and LDN 1 drift corrected cropped.tif	5	176	347	257	247	247	110.494	No
897	TCF Lef FGF and LDN 1 drift corrected cropped.tif	5	177	346	256	247	247	110.023	No
898	TCF Lef FGF and LDN 1 drift corrected cropped.tif	5	178	343	254	247	247	108.24	No
899	TCF Lef FGF and LDN 1 drift corrected cropped.tif	5	179	342	254	247	247	107.355	No
900	TCF Lef FGF and LDN 1 drift corrected cropped.tif	5	180	344	257	247	247	107.787	No
901	TCF Lef FGF and LDN 1 drift corrected cropped.tif	5	181	347	260	247	247	109.252	No
902	TCF Lef FGF and LDN 1 drift corrected cropped.tif	5	182	346	259	247	247	108.747	No
903	TCF Lef FGF and LDN 1 drift corrected cropped.tif	5	183	342	258	247	247	105.551	No
904	TCF Lef FGF and LDN 1 drift corrected cropped.tif	5	184	342	258	247	247	105.551	No
905	TCF Lef FGF and LDN 1 drift corrected cropped.tif	5	185	342	260	247	247	104.695	No
906	TCF Lef FGF and LDN 1 drift corrected cropped.tif	5	186	344	259	247	247	106.93	No
907	TCF Lef FGF and LDN 1 drift corrected cropped.tif	5	187	345	259	247	247	107.838	No
908	TCF Lef FGF and LDN 1 drift corrected cropped.tif	5	188	343	260	247	247	105.603	No
909	TCF Lef FGF and LDN 1 drift corrected cropped.tif	5	189	341	260	247	247	103.788	No
910	TCF Lef FGF and LDN 1 drift corrected cropped.tif	5	190	345	260	247	247	107.424	No
911	TCF Lef FGF and LDN 1 drift corrected cropped.tif	5	191	340	260	247	247	102.883	No
912	TCF Lef FGF and LDN 1 drift corrected cropped.tif	5	192	340	260	247	247	102.883	No
913	TCF Lef FGF and LDN 1 drift corrected cropped.tif	5	193	342	260	247	247	104.695	No
914	TCF Lef FGF and LDN 1 drift corrected cropped.tif	5	194	344	260	247	247	106.513	No
915	TCF Lef FGF and LDN 1 drift corrected cropped.tif	5	195	345	260	247	247	107.424	No
916	TCF Lef FGF and LDN 1 drift corrected cropped.tif	5	196	343	261	247	247	105.19	No
917	TCF Lef FGF and LDN 1 drift corrected cropped.tif	5	197	342	260	247	247	104.695	No
918	TCF Lef FGF and LDN 1 drift corrected cropped.tif	5	198	341	260	247	247	103.788	No
919	TCF Lef FGF and LDN 1 drift corrected cropped.tif	5	199	339	260	247	247	101.98	No
920	TCF Lef FGF and LDN 1 drift corrected cropped.tif	5	200	339	260	247	247	101.98	No
921	TCF Lef FGF and LDN 1 drift corrected cropped.tif	5	201	340	260	247	247	102.883	No
922	TCF Lef FGF and LDN 1 drift corrected cropped.tif	5	202	344	260	247	247	106.513	No
923	TCF Lef FGF and LDN 1 drift corrected cropped.tif	5	203	344	261	247	247	106.104	No
924	TCF Lef FGF and LDN 1 drift corrected cropped.tif	5	204	343	262	247	247	104.785	No
925	TCF Lef FGF and LDN 1 drift corrected cropped.tif	5	205	341	262	247	247	102.956	No
926	TCF Lef FGF and LDN 1 drift corrected cropped.tif	5	206	342	261	247	247	104.278	No
927	TCF Lef FGF and LDN 1 drift corrected cropped.tif	5	207	344	260	247	247	106.513	No
928	TCF Lef FGF and LDN 1 drift corrected cropped.tif	5	208	342	260	247	247	104.695	No
929	TCF Lef FGF and LDN 1 drift corrected cropped.tif	5	209	343	262	247	247	104.785	No
930	TCF Lef FGF and LDN 1 drift corrected cropped.tif	5	210	342	262	247	247	103.87	No
931	TCF Lef FGF and LDN 1 drift corrected cropped.tif	5	211	339	263	247	247	100.722	No
932	TCF Lef FGF and LDN 1 drift corrected cropped.tif	5	212	337	264	247	247	98.4886	No
933	TCF Lef FGF and LDN 1 drift corrected cropped.tif	5	213	337	265	247	247	98.0867	No
934	TCF Lef FGF and LDN 1 drift corrected cropped.tif	5	214	337	264	247	247	98.4886	No
935	TCF Lef FGF and LDN 1 drift corrected cropped.tif	5	215	338	264	247	247	99.4032	No
936	TCF Lef FGF and LDN 1 drift corrected cropped.tif	5	216	339	264	247	247	100.32	No
937	TCF Lef FGF and LDN 1 drift corrected cropped.tif	5	217	339	268	247	247	98.7927	No
938	TCF Lef FGF and LDN 1 drift corrected cropped.tif	5	218	339	267	247	247	99.1615	No
939	TCF Lef FGF and LDN 1 drift corrected cropped.tif	5	219	337	269	247	247	96.566	No
940	TCF Lef FGF and LDN 1 drift corrected cropped.tif	5	220	336	269	247	247	95.6347	No
941	TCF Lef FGF and LDN 1 drift corrected cropped.tif	5	221	334	269	247	247	93.7763	No
942	TCF Lef FGF and LDN 1 drift corrected cropped.tif	5	222	332	268	247	247	92.3093	No
943	TCF Lef FGF and LDN 1 drift corrected cropped.tif	5	223	332	268	247	247	92.3093	No
944	TCF Lef FGF and LDN 1 drift corrected cropped.tif	5	224	334	267	247	247	94.541	No
945	TCF Lef FGF and LDN 1 drift corrected cropped.tif	5	225	336	268	247	247	96.0052	No
946	TCF Lef FGF and LDN 1 drift corrected cropped.tif	5	226	333	269	247	247	92.8493	No
947	TCF Lef FGF and LDN 1 drift corrected cropped.tif	5	227	334	268	247	247	94.1541	No
948	TCF Lef FGF and LDN 1 drift corrected cropped.tif	5	228	334	268	247	247	94.1541	No
949	TCF Lef FGF and LDN 1 drift corrected cropped.tif	5	229	334	268	247	247	94.1541	No
950	TCF Lef FGF and LDN 1 drift corrected cropped.tif	5	230	332	268	247	247	92.3093	No
951	TCF Lef FGF and LDN 1 drift corrected cropped.tif	5	231	333	267	247	247	93.6216	No
952	TCF Lef FGF and LDN 1 drift corrected cropped.tif	5	232	333	269	247	247	92.8493	No
953	TCF Lef FGF and LDN 1 drift corrected cropped.tif	5	233	333	268	247	247	93.2309	No
954	TCF Lef FGF and LDN 1 drift corrected cropped.tif	5	234	332	266	247	247	93.1075	No
955	TCF Lef FGF and LDN 1 drift corrected cropped.tif	5	235	331	265	247	247	92.6121	No
956	TCF Lef FGF and LDN 1 drift corrected cropped.tif	5	236	329	264	247	247	91.236	No
957	TCF Lef FGF and LDN 1 drift corrected cropped.tif	5	236	328	264	247	247	90.3383	No
958	TCF Lef FGF and LDN 1 drift corrected cropped.tif	6	1	243	139	178	178	68.6222	No
959	TCF Lef FGF and LDN 1 drift corrected cropped.tif	6	2	243	139	178	178	68.6222	No
960	TCF Lef FGF and LDN 1 drift corrected cropped.tif	6	3	241	138	178	178	67.0671	No
961	TCF Lef FGF and LDN 1 drift corrected cropped.tif	6	4	241	138	178	178	67.0671	No
962	TCF Lef FGF and LDN 1 drift corrected cropped.tif	6	5	241	138	178	178	67.0671	No
963	TCF Lef FGF and LDN 1 drift corrected cropped.tif	6	6	243	135	178	178	70.0071	No
964	TCF Lef FGF and LDN 1 drift corrected cropped.tif	6	7	239	135	178	178	66.3099	No
965	TCF Lef FGF and LDN 1 drift corrected cropped.tif	6	8	239	135	178	178	66.3099	No
966	TCF Lef FGF and LDN 1 drift corrected cropped.tif	6	9	239	135	178	178	66.3099	No
967	TCF Lef FGF and LDN 1 drift corrected cropped.tif	6	10	240	135	178	178	67.2309	No
968	TCF Lef FGF and LDN 1 drift corrected cropped.tif	6	11	242	135	178	178	69.0797	No
969	TCF Lef FGF and LDN 1 drift corrected cropped.tif	6	12	242	135	178	178	69.0797	No
970	TCF Lef FGF and LDN 1 drift corrected cropped.tif	6	13	242	135	178	178	69.0797	No
971	TCF Lef FGF and LDN 1 drift corrected cropped.tif	6	14	244	135	178	178	70.9366	No
972	TCF Lef FGF and LDN 1 drift corrected cropped.tif	6	15	244	135	178	178	70.9366	No
973	TCF Lef FGF and LDN 1 drift corrected cropped.tif	6	16	244	135	178	178	70.9366	No
974	TCF Lef FGF and LDN 1 drift corrected cropped.tif	6	17	244	134	178	178	71.3092	No
975	TCF Lef FGF and LDN 1 drift corrected cropped.tif	6	18	245	134	178	178	72.2357	No
976	TCF Lef FGF and LDN 1 drift corrected cropped.tif	6	19	243	132	178	178	71.1758	No
977	TCF Lef FGF and LDN 1 drift corrected cropped.tif	6	20	242	130	172	172	70.5762	No
978	TCF Lef FGF and LDN 1 drift corrected cropped.tif	6	21	242	130	172	172	70.5762	No
979	TCF Lef FGF and LDN 1 drift corrected cropped.tif	6	22	240	130	172	172	68.593	No
980	TCF Lef FGF and LDN 1 drift corrected cropped.tif	6	23	240	130	172	172	68.593	No
981	TCF Lef FGF and LDN 1 drift corrected cropped.tif	6	24	238	129	172	172	66.7533	No
982	TCF Lef FGF and LDN 1 drift corrected cropped.tif	6	25	238	129	172	172	66.7533	No
983	TCF Lef FGF and LDN 1 drift corrected cropped.tif	6	26	238	129	172	172	66.7533	No
984	TCF Lef FGF and LDN 1 drift corrected cropped.tif	6	27	238	129	172	172	66.7533	No
985	TCF Lef FGF and LDN 1 drift corrected cropped.tif	6	28	237	130	172	172	65.6201	No
986	TCF Lef FGF and LDN 1 drift corrected cropped.tif	6	29	237	130	172	172	65.6201	No
987	TCF Lef FGF and LDN 1 drift corrected cropped.tif	6	30	235	130	172	172	63.6396	No
988	TCF Lef FGF and LDN 1 drift corrected cropped.tif	6	31	237	130	172	172	65.6201	No
989	TCF Lef FGF and LDN 1 drift corrected cropped.tif	6	32	237	130	172	172	65.6201	No
990	TCF Lef FGF and LDN 1 drift corrected cropped.tif	6	33	237	130	172	172	65.6201	No
991	TCF Lef FGF and LDN 1 drift corrected cropped.tif	6	34	237	130	172	172	65.6201	No
992	TCF Lef FGF and LDN 1 drift corrected cropped.tif	6	35	237	130	172	172	65.6201	No
993	TCF Lef FGF and LDN 1 drift corrected cropped.tif	6	36	237	130	172	172	65.6201	No
994	TCF Lef FGF and LDN 1 drift corrected cropped.tif	6	37	231	124	172	172	60.8769	No
995	TCF Lef FGF and LDN 1 drift corrected cropped.tif	6	38	225	118	172	172	57.0088	No
996	TCF Lef FGF and LDN 1 drift corrected cropped.tif	6	39	227	121	172	172	57.8705	No
997	TCF Lef FGF and LDN 1 drift corrected cropped.tif	6	40	228	121	172	172	58.8218	No
998	TCF Lef FGF and LDN 1 drift corrected cropped.tif	6	41	227	121	172	172	57.8705	No
999	TCF Lef FGF and LDN 1 drift corrected cropped.tif	6	42	228	121	172	172	58.8218	No
1000	TCF Lef FGF and LDN 1 drift corrected cropped.tif	6	43	228	121	172	172	58.8218	No
1001	TCF Lef FGF and LDN 1 drift corrected cropped.tif	6	44	225	121	172	172	55.9732	No
1002	TCF Lef FGF and LDN 1 drift corrected cropped.tif	6	45	225	119	172	172	56.648	No
1003	TCF Lef FGF and LDN 1 drift corrected cropped.tif	6	46	223	119	172	172	54.7814	No
1004	TCF Lef FGF and LDN 1 drift corrected cropped.tif	6	47	225	118	172	172	57.0088	No
1005	TCF Lef FGF and LDN 1 drift corrected cropped.tif	6	48	229	118	172	172	60.7454	No
1006	TCF Lef FGF and LDN 1 drift corrected cropped.tif	6	49	229	116	172	172	61.4654	No
1007	TCF Lef FGF and LDN 1 drift corrected cropped.tif	6	50	231	117	172	172	62.9682	No
1008	TCF Lef FGF and LDN 1 drift corrected cropped.tif	6	51	229	120	172	172	60.0833	No
1009	TCF Lef FGF and LDN 1 drift corrected cropped.tif	6	52	231	118	172	172	62.6259	No
1010	TCF Lef FGF and LDN 1 drift corrected cropped.tif	6	53	232	120	172	172	62.9365	No
1011	TCF Lef FGF and LDN 1 drift corrected cropped.tif	6	54	232	120	172	172	62.9365	No
1012	TCF Lef FGF and LDN 1 drift corrected cropped.tif	6	55	231	120	172	172	61.9839	No
1013	TCF Lef FGF and LDN 1 drift corrected cropped.tif	6	56	226	118	172	172	57.9396	No
1014	TCF Lef FGF and LDN 1 drift corrected cropped.tif	6	57	226	118	172	172	57.9396	No
1015	TCF Lef FGF and LDN 1 drift corrected cropped.tif	6	58	223	117	172	172	55.5428	No
1016	TCF Lef FGF and LDN 1 drift corrected cropped.tif	6	59	223	116	172	172	55.9464	No
1017	TCF Lef FGF and LDN 1 drift corrected cropped.tif	6	60	223	116	172	172	55.9464	No
1018	TCF Lef FGF and LDN 1 drift corrected cropped.tif	6	61	223	118	172	172	55.1543	No
1019	TCF Lef FGF and LDN 1 drift corrected cropped.tif	6	62	223	118	172	172	55.1543	No
1020	TCF Lef FGF and LDN 1 drift corrected cropped.tif	6	63	221	118	172	172	53.3104	No
1021	TCF Lef FGF and LDN 1 drift corrected cropped.tif	6	64	220	117	172	172	52.8015	No
1022	TCF Lef FGF and LDN 1 drift corrected cropped.tif	6	65	220	117	172	172	52.8015	No
1023	TCF Lef FGF and LDN 1 drift corrected cropped.tif	6	66	220	118	172	172	52.3927	No
1024	TCF Lef FGF and LDN 1 drift corrected cropped.tif	6	67	218	118	172	172	50.5668	No
1025	TCF Lef FGF and LDN 1 drift corrected cropped.tif	6	68	219	118	172	172	51.4782	No
1026	TCF Lef FGF and LDN 1 drift corrected cropped.tif	6	69	219	118	172	172	51.4782	No
1027	TCF Lef FGF and LDN 1 drift corrected cropped.tif	6	70	219	118	172	172	51.4782	No
1028	TCF Lef FGF and LDN 1 drift corrected cropped.tif	6	71	219	115	172	172	52.7731	No
1029	TCF Lef FGF and LDN 1 drift corrected cropped.tif	6	72	216	115	172	172	50.1199	No
1030	TCF Lef FGF and LDN 1 drift corrected cropped.tif	6	73	216	115	172	172	50.1199	No
1031	TCF Lef FGF and LDN 1 drift corrected cropped.tif	6	74	214	115	172	172	48.3735	No
1032	TCF Lef FGF and LDN 1 drift corrected cropped.tif	6	75	214	116	172	172	47.8853	No
1033	TCF Lef FGF and LDN 1 drift corrected cropped.tif	6	76	214	116	172	172	47.8853	No
1034	TCF Lef FGF and LDN 1 drift corrected cropped.tif	6	77	213	116	172	172	47.0106	No
1035	TCF Lef FGF and LDN 1 drift corrected cropped.tif	6	78	214	117	172	172	47.4131	No
1036	TCF Lef FGF and LDN 1 drift corrected cropped.tif	6	79	213	118	172	172	46.0652	No
1037	TCF Lef FGF and LDN 1 drift corrected cropped.tif	6	80	212	118	172	172	45.1774	No
1038	TCF Lef FGF and LDN 1 drift corrected cropped.tif	6	81	209	120	172	172	41.5933	No
1039	TCF Lef FGF and LDN 1 drift corrected cropped.tif	6	82	212	118	172	172	45.1774	No
1040	TCF Lef FGF and LDN 1 drift corrected cropped.tif	6	83	210	118	172	172	43.4166	No
1041	TCF Lef FGF and LDN 1 drift corrected cropped.tif	6	84	209	120	172	172	41.5933	No
1042	TCF Lef FGF and LDN 1 drift corrected cropped.tif	6	85	209	120	172	172	41.5933	No
1043	TCF Lef FGF and LDN 1 drift corrected cropped.tif	6	86	209	119	172	172	42.0595	No
1044	TCF Lef FGF and LDN 1 drift corrected cropped.tif	6	87	208	118	172	172	41.6773	No
1045	TCF Lef FGF and LDN 1 drift corrected cropped.tif	6	88	207	119	172	172	40.3113	No
1046	TCF Lef FGF and LDN 1 drift corrected cropped.tif	6	89	209	120	172	172	41.5933	No
1047	TCF Lef FGF and LDN 1 drift corrected cropped.tif	6	90	206	118	172	172	39.9625	No
1048	TCF Lef FGF and LDN 1 drift corrected cropped.tif	6	91	206	118	172	172	39.9625	No
1049	TCF Lef FGF and LDN 1 drift corrected cropped.tif	6	92	209	118	172	172	42.5441	No
1050	TCF Lef FGF and LDN 1 drift corrected cropped.tif	6	93	210	119	172	172	42.9418	No
1051	TCF Lef FGF and LDN 1 drift corrected cropped.tif	6	94	207	118	172	172	40.8167	No
1052	TCF Lef FGF and LDN 1 drift corrected cropped.tif	6	95	207	117	172	172	41.3401	No
1053	TCF Lef FGF and LDN 1 drift corrected cropped.tif	6	96	206	117	172	172	40.4969	No
1054	TCF Lef FGF and LDN 1 drift corrected cropped.tif	6	97	205	117	172	172	39.6611	No
1055	TCF Lef FGF and LDN 1 drift corrected cropped.tif	6	98	200	120	172	172	33.8378	Yes
1056	TCF Lef FGF and LDN 1 drift corrected cropped.tif	6	99	200	121	172	172	33.2866	Yes
1057	TCF Lef FGF and LDN 1 drift corrected cropped.tif	6	100	198	121	172	172	31.6228	Yes
1058	TCF Lef FGF and LDN 1 drift corrected cropped.tif	6	101	197	120	172	172	31.4006	Yes
1059	TCF Lef FGF and LDN 1 drift corrected cropped.tif	6	102	197	118	172	172	32.6497	Yes
1060	TCF Lef FGF and LDN 1 drift corrected cropped.tif	6	103	197	123	172	172	29.6816	Yes
1061	TCF Lef FGF and LDN 1 drift corrected cropped.tif	6	104	197	127	172	172	27.7308	Yes
1062	TCF Lef FGF and LDN 1 drift corrected cropped.tif	6	105	197	127	172	172	27.7308	Yes
1063	TCF Lef FGF and LDN 1 drift corrected cropped.tif	6	106	197	127	172	172	27.7308	Yes
1064	TCF Lef FGF and LDN 1 drift corrected cropped.tif	6	107	197	125	172	172	28.6531	Yes
1065	TCF Lef FGF and LDN 1 drift corrected cropped.tif	6	108	197	125	172	172	28.6531	Yes
1066	TCF Lef FGF and LDN 1 drift corrected cropped.tif	6	109	200	123	172	172	32.249	Yes
1067	TCF Lef FGF and LDN 1 drift corrected cropped.tif	6	110	200	123	172	172	32.249	Yes
1068	TCF Lef FGF and LDN 1 drift corrected cropped.tif	6	111	197	124	172	172	29.1548	Yes
1069	TCF Lef FGF and LDN 1 drift corrected cropped.tif	6	112	197	125	172	172	28.6531	Yes
1070	TCF Lef FGF and LDN 1 drift corrected cropped.tif	6	113	197	130	172	172	26.5707	Yes
1071	TCF Lef FGF and LDN 1 drift corrected cropped.tif	6	114	197	128	172	172	27.313	Yes
1072	TCF Lef FGF and LDN 1 drift corrected cropped.tif	6	115	194	130	172	172	23.7697	Yes
1073	TCF Lef FGF and LDN 1 drift corrected cropped.tif	6	116	194	130	172	172	23.7697	Yes
1074	TCF Lef FGF and LDN 1 drift corrected cropped.tif	7	1	178	141	172	172	6.3246	Yes
1075	TCF Lef FGF and LDN 1 drift corrected cropped.tif	7	2	179	141	172	172	7.2801	Yes
1076	TCF Lef FGF and LDN 1 drift corrected cropped.tif	7	3	180	142	172	172	8.544	Yes
1077	TCF Lef FGF and LDN 1 drift corrected cropped.tif	7	4	179	141	172	172	7.2801	Yes
1078	TCF Lef FGF and LDN 1 drift corrected cropped.tif	7	5	178	142	172	172	6.7082	Yes
1079	TCF Lef FGF and LDN 1 drift corrected cropped.tif	7	6	178	141	172	172	6.3246	Yes
1080	TCF Lef FGF and LDN 1 drift corrected cropped.tif	7	7	175	139	172	172	3	Yes
1081	TCF Lef FGF and LDN 1 drift corrected cropped.tif	7	8	175	140	172	172	3.1623	Yes
1082	TCF Lef FGF and LDN 1 drift corrected cropped.tif	7	9	177	140	172	172	5.099	Yes
1083	TCF Lef FGF and LDN 1 drift corrected cropped.tif	7	10	177	141	172	172	5.3852	Yes
1084	TCF Lef FGF and LDN 1 drift corrected cropped.tif	7	11	175	144	171	171	4.1231	Yes
1085	TCF Lef FGF and LDN 1 drift corrected cropped.tif	7	12	175	144	171	171	4.1231	Yes
1086	TCF Lef FGF and LDN 1 drift corrected cropped.tif	7	13	176	144	171	171	5.099	Yes
1087	TCF Lef FGF and LDN 1 drift corrected cropped.tif	7	14	176	144	171	171	5.099	Yes
1088	TCF Lef FGF and LDN 1 drift corrected cropped.tif	7	15	173	140	172	172	1.4142	Yes
1089	TCF Lef FGF and LDN 1 drift corrected cropped.tif	7	16	174	142	171	171	3	Yes
1090	TCF Lef FGF and LDN 1 drift corrected cropped.tif	7	17	171	141	171	171	0	Yes
1091	TCF Lef FGF and LDN 1 drift corrected cropped.tif	7	18	173	143	171	171	2	Yes
1092	TCF Lef FGF and LDN 1 drift corrected cropped.tif	7	19	173	141	171	171	2	Yes
1093	TCF Lef FGF and LDN 1 drift corrected cropped.tif	7	20	175	143	171	171	4	Yes
1094	TCF Lef FGF and LDN 1 drift corrected cropped.tif	7	21	177	144	171	171	6.0828	Yes
1095	TCF Lef FGF and LDN 1 drift corrected cropped.tif	7	22	176	143	171	171	5	Yes
1096	TCF Lef FGF and LDN 1 drift corrected cropped.tif	7	23	175	141	172	172	3.6056	Yes
1097	TCF Lef FGF and LDN 1 drift corrected cropped.tif	7	24	176	142	172	172	5	Yes
1098	TCF Lef FGF and LDN 1 drift corrected cropped.tif	7	25	176	142	172	172	5	Yes
1099	TCF Lef FGF and LDN 1 drift corrected cropped.tif	7	26	176	142	172	172	5	Yes
1100	TCF Lef FGF and LDN 1 drift corrected cropped.tif	7	27	176	144	171	171	5.099	Yes
1101	TCF Lef FGF and LDN 1 drift corrected cropped.tif	7	28	176	147	170	170	6	Yes
1102	TCF Lef FGF and LDN 1 drift corrected cropped.tif	7	29	175	147	170	170	5	Yes
1103	TCF Lef FGF and LDN 1 drift corrected cropped.tif	7	30	175	146	171	171	5	Yes
1104	TCF Lef FGF and LDN 1 drift corrected cropped.tif	7	31	175	146	171	171	5	Yes
1105	TCF Lef FGF and LDN 1 drift corrected cropped.tif	7	32	173	146	170	170	3	Yes
1106	TCF Lef FGF and LDN 1 drift corrected cropped.tif	7	33	174	145	171	171	3.6056	Yes
1107	TCF Lef FGF and LDN 1 drift corrected cropped.tif	7	34	175	145	171	171	4.4721	Yes
1108	TCF Lef FGF and LDN 1 drift corrected cropped.tif	7	35	175	146	171	171	5	Yes
1109	TCF Lef FGF and LDN 1 drift corrected cropped.tif	7	36	175	146	171	171	5	Yes
1110	TCF Lef FGF and LDN 1 drift corrected cropped.tif	7	37	174	145	171	171	3.6056	Yes
1111	TCF Lef FGF and LDN 1 drift corrected cropped.tif	7	38	174	145	171	171	3.6056	Yes
1112	TCF Lef FGF and LDN 1 drift corrected cropped.tif	7	39	174	145	171	171	3.6056	Yes
1113	TCF Lef FGF and LDN 1 drift corrected cropped.tif	7	40	173	144	171	171	2.2361	Yes
1114	TCF Lef FGF and LDN 1 drift corrected cropped.tif	7	41	173	143	171	171	2	Yes
1115	TCF Lef FGF and LDN 1 drift corrected cropped.tif	7	42	172	142	171	171	1	Yes
1116	TCF Lef FGF and LDN 1 drift corrected cropped.tif	7	43	172	142	171	171	1	Yes
1117	TCF Lef FGF and LDN 1 drift corrected cropped.tif	7	44	171	141	171	171	0	Yes
1118	TCF Lef FGF and LDN 1 drift corrected cropped.tif	7	45	172	140	172	172	1	Yes
1119	TCF Lef FGF and LDN 1 drift corrected cropped.tif	7	46	172	140	172	172	1	Yes
1120	TCF Lef FGF and LDN 1 drift corrected cropped.tif	7	47	172	140	172	172	1	Yes
1121	TCF Lef FGF and LDN 1 drift corrected cropped.tif	7	48	172	140	172	172	1	Yes
1122	TCF Lef FGF and LDN 1 drift corrected cropped.tif	7	49	172	138	172	172	1	Yes
1123	TCF Lef FGF and LDN 1 drift corrected cropped.tif	7	50	171	138	172	172	1.4142	Yes
1124	TCF Lef FGF and LDN 1 drift corrected cropped.tif	7	51	171	138	172	172	1.4142	Yes
1125	TCF Lef FGF and LDN 1 drift corrected cropped.tif	7	52	172	138	172	172	1	Yes
1126	TCF Lef FGF and LDN 1 drift corrected cropped.tif	7	53	170	138	172	172	2.2361	Yes
1127	TCF Lef FGF and LDN 1 drift corrected cropped.tif	7	54	169	138	171	171	2.8284	Yes
1128	TCF Lef FGF and LDN 1 drift corrected cropped.tif	7	55	170	139	171	171	1.4142	Yes
1129	TCF Lef FGF and LDN 1 drift corrected cropped.tif	7	56	170	139	171	171	1.4142	Yes
1130	TCF Lef FGF and LDN 1 drift corrected cropped.tif	7	57	171	138	172	172	1.4142	Yes
1131	TCF Lef FGF and LDN 1 drift corrected cropped.tif	7	58	171	138	172	172	1.4142	Yes
1132	TCF Lef FGF and LDN 1 drift corrected cropped.tif	7	59	171	138	172	172	1.4142	Yes
1133	TCF Lef FGF and LDN 1 drift corrected cropped.tif	7	60	169	137	172	172	3.6056	Yes
1134	TCF Lef FGF and LDN 1 drift corrected cropped.tif	7	61	168	135	164	164	5.6569	Yes
1135	TCF Lef FGF and LDN 1 drift corrected cropped.tif	7	62	166	136	163	163	3.6056	Yes
1136	TCF Lef FGF and LDN 1 drift corrected cropped.tif	7	63	164	137	163	163	1.4142	Yes
1137	TCF Lef FGF and LDN 1 drift corrected cropped.tif	7	64	164	135	162	162	2.8284	Yes
1138	TCF Lef FGF and LDN 1 drift corrected cropped.tif	7	65	164	136	162	162	2.2361	Yes
1139	TCF Lef FGF and LDN 1 drift corrected cropped.tif	7	66	156	129	155	155	1.4142	Yes
1140	TCF Lef FGF and LDN 1 drift corrected cropped.tif	7	67	164	137	163	163	1.4142	Yes
1141	TCF Lef FGF and LDN 1 drift corrected cropped.tif	7	68	164	138	163	163	1	Yes
1142	TCF Lef FGF and LDN 1 drift corrected cropped.tif	7	69	163	138	163	163	0	Yes
1143	TCF Lef FGF and LDN 1 drift corrected cropped.tif	7	70	162	138	162	162	1	Yes
1144	TCF Lef FGF and LDN 1 drift corrected cropped.tif	7	71	159	139	161	161	3.6056	Yes
1145	TCF Lef FGF and LDN 1 drift corrected cropped.tif	7	72	157	137	159	159	3.6056	Yes
1146	TCF Lef FGF and LDN 1 drift corrected cropped.tif	7	73	158	138	160	160	3.6056	Yes
1147	TCF Lef FGF and LDN 1 drift corrected cropped.tif	7	74	156	140	160	160	6.4031	Yes
1148	TCF Lef FGF and LDN 1 drift corrected cropped.tif	7	75	159	143	157	157	5.3852	Yes
1149	TCF Lef FGF and LDN 1 drift corrected cropped.tif	7	76	156	138	159	159	5	Yes
1150	TCF Lef FGF and LDN 1 drift corrected cropped.tif	7	77	157	141	161	161	6.4031	Yes
1151	TCF Lef FGF and LDN 1 drift corrected cropped.tif	7	78	157	141	161	161	6.4031	Yes
1152	TCF Lef FGF and LDN 1 drift corrected cropped.tif	7	79	159	145	157	157	3.6056	Yes
1153	TCF Lef FGF and LDN 1 drift corrected cropped.tif	7	80	159	143	157	157	5.3852	Yes
1154	TCF Lef FGF and LDN 1 drift corrected cropped.tif	7	81	159	144	157	157	4.4721	Yes
1155	TCF Lef FGF and LDN 1 drift corrected cropped.tif	7	82	161	143	164	164	5	Yes
1156	TCF Lef FGF and LDN 1 drift corrected cropped.tif	7	83	161	141	163	163	3.6056	Yes
1157	TCF Lef FGF and LDN 1 drift corrected cropped.tif	7	84	164	142	165	165	2.2361	Yes
1158	TCF Lef FGF and LDN 1 drift corrected cropped.tif	7	85	162	141	164	164	2.8284	Yes
1159	TCF Lef FGF and LDN 1 drift corrected cropped.tif	7	86	162	139	163	163	1.4142	Yes
1160	TCF Lef FGF and LDN 1 drift corrected cropped.tif	7	87	163	138	163	163	0	Yes
1161	TCF Lef FGF and LDN 1 drift corrected cropped.tif	7	88	164	136	162	162	2.2361	Yes
1162	TCF Lef FGF and LDN 1 drift corrected cropped.tif	7	89	165	136	163	163	2.8284	Yes
1163	TCF Lef FGF and LDN 1 drift corrected cropped.tif	7	90	166	142	166	166	1	Yes
1164	TCF Lef FGF and LDN 1 drift corrected cropped.tif	7	91	161	138	162	162	1.4142	Yes
1165	TCF Lef FGF and LDN 1 drift corrected cropped.tif	7	92	166	140	165	165	1	Yes
1166	TCF Lef FGF and LDN 1 drift corrected cropped.tif	7	93	166	143	167	167	1.4142	Yes
1167	TCF Lef FGF and LDN 1 drift corrected cropped.tif	7	94	164	137	163	163	1.4142	Yes
1168	TCF Lef FGF and LDN 1 drift corrected cropped.tif	7	95	164	135	162	162	2.8284	Yes
1169	TCF Lef FGF and LDN 1 drift corrected cropped.tif	7	96	166	142	166	166	1	Yes
1170	TCF Lef FGF and LDN 1 drift corrected cropped.tif	7	97	164	140	164	164	1	Yes
1171	TCF Lef FGF and LDN 1 drift corrected cropped.tif	7	98	166	140	165	165	1	Yes
1172	TCF Lef FGF and LDN 1 drift corrected cropped.tif	7	99	169	143	168	168	1	Yes
1173	TCF Lef FGF and LDN 1 drift corrected cropped.tif	8	1	225	343	210	210	39	Yes
1174	TCF Lef FGF and LDN 1 drift corrected cropped.tif	8	2	223	342	210	210	37.3363	Yes
1175	TCF Lef FGF and LDN 1 drift corrected cropped.tif	8	3	223	342	210	210	37.3363	Yes
1176	TCF Lef FGF and LDN 1 drift corrected cropped.tif	8	4	223	345	210	210	40.1622	Yes
1177	TCF Lef FGF and LDN 1 drift corrected cropped.tif	8	5	226	344	210	210	40.3113	Yes
1178	TCF Lef FGF and LDN 1 drift corrected cropped.tif	8	6	225	343	210	210	39	Yes
1179	TCF Lef FGF and LDN 1 drift corrected cropped.tif	8	7	225	342	210	210	38.0789	Yes
1180	TCF Lef FGF and LDN 1 drift corrected cropped.tif	8	8	220	339	210	210	33.5261	Yes
1181	TCF Lef FGF and LDN 1 drift corrected cropped.tif	8	9	223	338	210	210	33.6155	Yes
1182	TCF Lef FGF and LDN 1 drift corrected cropped.tif	8	10	223	338	210	210	33.6155	Yes
1183	TCF Lef FGF and LDN 1 drift corrected cropped.tif	8	11	226	339	233	233	35.6931	Yes
1184	TCF Lef FGF and LDN 1 drift corrected cropped.tif	8	12	225	342	210	210	38.0789	Yes
1185	TCF Lef FGF and LDN 1 drift corrected cropped.tif	8	13	226	342	210	210	38.4838	Yes
1186	TCF Lef FGF and LDN 1 drift corrected cropped.tif	8	14	226	344	210	210	40.3113	Yes
1187	TCF Lef FGF and LDN 1 drift corrected cropped.tif	8	15	228	344	238	238	40.2616	Yes
1188	TCF Lef FGF and LDN 1 drift corrected cropped.tif	8	16	228	344	238	238	40.2616	Yes
1189	TCF Lef FGF and LDN 1 drift corrected cropped.tif	8	17	229	346	238	238	41.9762	Yes
1190	TCF Lef FGF and LDN 1 drift corrected cropped.tif	8	18	229	346	238	238	41.9762	Yes
1191	TCF Lef FGF and LDN 1 drift corrected cropped.tif	8	19	229	347	238	238	42.9535	Yes
1192	TCF Lef FGF and LDN 1 drift corrected cropped.tif	8	20	229	347	238	238	42.9535	Yes
1193	TCF Lef FGF and LDN 1 drift corrected cropped.tif	8	21	231	350	238	238	45.5412	Yes
1194	TCF Lef FGF and LDN 1 drift corrected cropped.tif	8	22	237	344	238	238	39.0128	Yes
1195	TCF Lef FGF and LDN 1 drift corrected cropped.tif	8	23	234	344	238	238	39.2046	Yes
1196	TCF Lef FGF and LDN 1 drift corrected cropped.tif	8	24	234	344	238	238	39.2046	Yes
1197	TCF Lef FGF and LDN 1 drift corrected cropped.tif	8	25	236	347	238	238	42.0476	Yes
1198	TCF Lef FGF and LDN 1 drift corrected cropped.tif	8	26	235	344	238	238	39.1152	Yes
1199	TCF Lef FGF and LDN 1 drift corrected cropped.tif	8	27	230	344	238	238	39.8121	Yes
1200	TCF Lef FGF and LDN 1 drift corrected cropped.tif	8	28	230	350	238	238	45.7056	Yes
1201	TCF Lef FGF and LDN 1 drift corrected cropped.tif	8	29	229	347	238	238	42.9535	Yes
1202	TCF Lef FGF and LDN 1 drift corrected cropped.tif	8	30	231	347	238	238	42.5793	Yes
1203	TCF Lef FGF and LDN 1 drift corrected cropped.tif	8	31	229	350	238	238	45.8912	Yes
1204	TCF Lef FGF and LDN 1 drift corrected cropped.tif	8	32	229	350	238	238	45.8912	Yes
1205	TCF Lef FGF and LDN 1 drift corrected cropped.tif	8	33	229	347	238	238	42.9535	Yes
1206	TCF Lef FGF and LDN 1 drift corrected cropped.tif	8	34	231	348	238	238	43.566	Yes
1207	TCF Lef FGF and LDN 1 drift corrected cropped.tif	8	35	231	353	238	238	48.5077	Yes
1208	TCF Lef FGF and LDN 1 drift corrected cropped.tif	8	36	231	353	238	238	48.5077	Yes
1209	TCF Lef FGF and LDN 1 drift corrected cropped.tif	8	37	230	350	238	238	45.7056	Yes
1210	TCF Lef FGF and LDN 1 drift corrected cropped.tif	8	38	230	350	238	238	45.7056	Yes
1211	TCF Lef FGF and LDN 1 drift corrected cropped.tif	8	39	230	350	238	238	45.7056	Yes
1212	TCF Lef FGF and LDN 1 drift corrected cropped.tif	8	40	230	350	238	238	45.7056	Yes
1213	TCF Lef FGF and LDN 1 drift corrected cropped.tif	8	41	230	350	238	238	45.7056	Yes
1214	TCF Lef FGF and LDN 1 drift corrected cropped.tif	8	42	230	352	238	238	47.676	Yes
1215	TCF Lef FGF and LDN 1 drift corrected cropped.tif	8	43	228	354	238	238	50.01	Yes
1216	TCF Lef FGF and LDN 1 drift corrected cropped.tif	8	44	226	355	210	210	50.5964	Yes
1217	TCF Lef FGF and LDN 1 drift corrected cropped.tif	8	45	226	355	210	210	50.5964	Yes
1218	TCF Lef FGF and LDN 1 drift corrected cropped.tif	8	46	226	354	210	210	49.6488	Yes
1219	TCF Lef FGF and LDN 1 drift corrected cropped.tif	8	47	226	353	210	210	48.7032	Yes
1220	TCF Lef FGF and LDN 1 drift corrected cropped.tif	8	48	226	353	210	210	48.7032	Yes
1221	TCF Lef FGF and LDN 1 drift corrected cropped.tif	8	49	226	353	210	210	48.7032	Yes
1222	TCF Lef FGF and LDN 1 drift corrected cropped.tif	8	50	226	352	210	210	47.7598	Yes
1223	TCF Lef FGF and LDN 1 drift corrected cropped.tif	8	51	229	350	238	238	45.8912	Yes
1224	TCF Lef FGF and LDN 1 drift corrected cropped.tif	8	52	229	349	238	238	44.911	Yes
1225	TCF Lef FGF and LDN 1 drift corrected cropped.tif	8	53	229	349	238	238	44.911	Yes
1226	TCF Lef FGF and LDN 1 drift corrected cropped.tif	8	54	231	347	238	238	42.5793	Yes
1227	TCF Lef FGF and LDN 1 drift corrected cropped.tif	8	55	231	349	238	238	44.5533	Yes
1228	TCF Lef FGF and LDN 1 drift corrected cropped.tif	8	56	231	350	238	238	45.5412	Yes
1229	TCF Lef FGF and LDN 1 drift corrected cropped.tif	8	57	231	348	238	238	43.566	Yes
1230	TCF Lef FGF and LDN 1 drift corrected cropped.tif	8	58	231	348	238	238	43.566	Yes
1231	TCF Lef FGF and LDN 1 drift corrected cropped.tif	8	59	231	347	238	238	42.5793	Yes
1232	TCF Lef FGF and LDN 1 drift corrected cropped.tif	8	60	233	350	238	238	45.2769	Yes
1233	TCF Lef FGF and LDN 1 drift corrected cropped.tif	8	61	232	350	238	238	45.3982	Yes
1234	TCF Lef FGF and LDN 1 drift corrected cropped.tif	8	62	232	350	238	238	45.3982	Yes
1235	TCF Lef FGF and LDN 1 drift corrected cropped.tif	8	63	233	348	238	238	43.2897	Yes
1236	TCF Lef FGF and LDN 1 drift corrected cropped.tif	8	64	234	347	238	238	42.19	Yes
1237	TCF Lef FGF and LDN 1 drift corrected cropped.tif	8	65	234	347	238	238	42.19	Yes
1238	TCF Lef FGF and LDN 1 drift corrected cropped.tif	8	66	231	348	238	238	43.566	Yes
1239	TCF Lef FGF and LDN 1 drift corrected cropped.tif	8	67	234	350	238	238	45.1774	Yes
1240	TCF Lef FGF and LDN 1 drift corrected cropped.tif	8	68	234	350	238	238	45.1774	Yes
1241	TCF Lef FGF and LDN 1 drift corrected cropped.tif	8	69	233	350	238	238	45.2769	Yes
1242	TCF Lef FGF and LDN 1 drift corrected cropped.tif	8	70	232	348	238	238	43.4166	Yes
1243	TCF Lef FGF and LDN 1 drift corrected cropped.tif	8	71	231	348	238	238	43.566	Yes
1244	TCF Lef FGF and LDN 1 drift corrected cropped.tif	8	72	231	347	238	238	42.5793	Yes
1245	TCF Lef FGF and LDN 1 drift corrected cropped.tif	8	73	234	345	238	238	40.1995	Yes
1246	TCF Lef FGF and LDN 1 drift corrected cropped.tif	8	74	236	344	238	238	39.0512	Yes
1247	TCF Lef FGF and LDN 1 drift corrected cropped.tif	8	75	237	342	238	238	37.0135	Yes
1248	TCF Lef FGF and LDN 1 drift corrected cropped.tif	8	76	238	338	238	238	33	Yes
1249	TCF Lef FGF and LDN 1 drift corrected cropped.tif	8	77	238	338	238	238	33	Yes
1250	TCF Lef FGF and LDN 1 drift corrected cropped.tif	8	78	238	337	238	238	32	Yes
1251	TCF Lef FGF and LDN 1 drift corrected cropped.tif	8	79	237	332	238	238	27.0185	Yes
1252	TCF Lef FGF and LDN 1 drift corrected cropped.tif	8	80	237	332	238	238	27.0185	Yes
1253	TCF Lef FGF and LDN 1 drift corrected cropped.tif	8	81	233	329	238	238	24.5153	Yes
1254	TCF Lef FGF and LDN 1 drift corrected cropped.tif	8	82	234	328	238	238	23.3452	Yes
1255	TCF Lef FGF and LDN 1 drift corrected cropped.tif	8	83	236	331	238	238	26.0768	Yes
1256	TCF Lef FGF and LDN 1 drift corrected cropped.tif	8	84	236	330	238	238	25.0799	Yes
1257	TCF Lef FGF and LDN 1 drift corrected cropped.tif	8	85	235	329	238	238	24.1868	Yes
1258	TCF Lef FGF and LDN 1 drift corrected cropped.tif	8	86	234	329	238	238	24.3311	Yes
1259	TCF Lef FGF and LDN 1 drift corrected cropped.tif	8	87	234	328	238	238	23.3452	Yes
1260	TCF Lef FGF and LDN 1 drift corrected cropped.tif	8	88	234	328	238	238	23.3452	Yes
1261	TCF Lef FGF and LDN 1 drift corrected cropped.tif	8	89	233	328	238	238	23.5372	Yes
1262	TCF Lef FGF and LDN 1 drift corrected cropped.tif	8	90	232	328	238	238	23.7697	Yes
1263	TCF Lef FGF and LDN 1 drift corrected cropped.tif	8	91	232	328	238	238	23.7697	Yes
1264	TCF Lef FGF and LDN 1 drift corrected cropped.tif	8	92	231	328	238	238	24.0416	Yes
1265	TCF Lef FGF and LDN 1 drift corrected cropped.tif	8	93	230	325	233	233	21.2132	Yes
1266	TCF Lef FGF and LDN 1 drift corrected cropped.tif	8	94	230	327	233	233	23.1948	Yes
1267	TCF Lef FGF and LDN 1 drift corrected cropped.tif	8	95	229	328	233	233	24.3311	Yes
1268	TCF Lef FGF and LDN 1 drift corrected cropped.tif	8	96	226	329	233	233	25.9615	Yes
1269	TCF Lef FGF and LDN 1 drift corrected cropped.tif	8	97	224	329	210	210	26.0768	Yes
1270	TCF Lef FGF and LDN 1 drift corrected cropped.tif	8	98	223	334	210	210	29.9666	Yes
1271	TCF Lef FGF and LDN 1 drift corrected cropped.tif	8	99	226	335	233	233	31.7805	Yes
1272	TCF Lef FGF and LDN 1 drift corrected cropped.tif	8	100	226	336	233	233	32.7567	Yes
1273	TCF Lef FGF and LDN 1 drift corrected cropped.tif	8	101	221	336	210	210	31.0161	Yes
1274	TCF Lef FGF and LDN 1 drift corrected cropped.tif	8	102	216	337	210	210	30.5941	Yes
1275	TCF Lef FGF and LDN 1 drift corrected cropped.tif	8	103	209	339	210	210	32.0156	Yes
1276	TCF Lef FGF and LDN 1 drift corrected cropped.tif	8	104	205	338	210	210	31.4006	Yes
1277	TCF Lef FGF and LDN 1 drift corrected cropped.tif	8	105	203	338	210	210	31.7805	Yes
1278	TCF Lef FGF and LDN 1 drift corrected cropped.tif	8	106	201	342	210	210	36.1386	Yes
1279	TCF Lef FGF and LDN 1 drift corrected cropped.tif	8	107	201	340	210	210	34.2053	Yes
1280	TCF Lef FGF and LDN 1 drift corrected cropped.tif	8	108	203	336	210	210	29.8329	Yes
1281	TCF Lef FGF and LDN 1 drift corrected cropped.tif	8	109	203	335	210	210	28.8617	Yes
1282	TCF Lef FGF and LDN 1 drift corrected cropped.tif	9	1	239	183	183	183	56.0089	No
1283	TCF Lef FGF and LDN 1 drift corrected cropped.tif	9	2	239	183	183	183	56.0089	No
1284	TCF Lef FGF and LDN 1 drift corrected cropped.tif	9	3	236	184	183	183	53	No
1285	TCF Lef FGF and LDN 1 drift corrected cropped.tif	9	4	236	184	183	183	53	No
1286	TCF Lef FGF and LDN 1 drift corrected cropped.tif	9	5	236	183	183	183	53.0094	No
1287	TCF Lef FGF and LDN 1 drift corrected cropped.tif	9	6	236	183	183	183	53.0094	No
1288	TCF Lef FGF and LDN 1 drift corrected cropped.tif	9	7	234	182	183	183	51.0392	No
1289	TCF Lef FGF and LDN 1 drift corrected cropped.tif	9	8	233	181	183	183	50.0899	No
1290	TCF Lef FGF and LDN 1 drift corrected cropped.tif	9	9	231	180	183	183	48.1664	No
1291	TCF Lef FGF and LDN 1 drift corrected cropped.tif	9	10	229	177	183	183	46.5296	No
1292	TCF Lef FGF and LDN 1 drift corrected cropped.tif	9	11	232	170	182	182	50.4876	No
1293	TCF Lef FGF and LDN 1 drift corrected cropped.tif	9	12	231	173	182	182	49.163	No
1294	TCF Lef FGF and LDN 1 drift corrected cropped.tif	9	13	230	170	182	182	48.5077	No
1295	TCF Lef FGF and LDN 1 drift corrected cropped.tif	9	14	231	169	182	182	49.6488	No
1296	TCF Lef FGF and LDN 1 drift corrected cropped.tif	9	15	231	166	182	182	50.2195	No
1297	TCF Lef FGF and LDN 1 drift corrected cropped.tif	9	16	231	166	182	182	50.2195	No
1298	TCF Lef FGF and LDN 1 drift corrected cropped.tif	9	17	231	162	181	181	50.8035	No
1299	TCF Lef FGF and LDN 1 drift corrected cropped.tif	9	18	238	168	182	182	56.7186	No
1300	TCF Lef FGF and LDN 1 drift corrected cropped.tif	9	19	236	169	182	182	54.5894	No
1301	TCF Lef FGF and LDN 1 drift corrected cropped.tif	9	20	234	171	182	182	52.345	No
1302	TCF Lef FGF and LDN 1 drift corrected cropped.tif	9	21	235	170	182	182	53.4603	No
1303	TCF Lef FGF and LDN 1 drift corrected cropped.tif	9	22	236	171	182	182	54.3323	No
1304	TCF Lef FGF and LDN 1 drift corrected cropped.tif	9	23	239	169	182	182	57.5587	No
1305	TCF Lef FGF and LDN 1 drift corrected cropped.tif	9	24	239	170	182	182	57.4282	No
1306	TCF Lef FGF and LDN 1 drift corrected cropped.tif	9	25	239	171	182	182	57.3149	No
1307	TCF Lef FGF and LDN 1 drift corrected cropped.tif	9	26	239	171	182	182	57.3149	No
1308	TCF Lef FGF and LDN 1 drift corrected cropped.tif	9	27	240	173	183	183	58.0517	No
1309	TCF Lef FGF and LDN 1 drift corrected cropped.tif	9	28	238	174	183	183	55.9017	No
1310	TCF Lef FGF and LDN 1 drift corrected cropped.tif	9	29	239	174	183	183	56.8859	No
1311	TCF Lef FGF and LDN 1 drift corrected cropped.tif	9	30	242	175	183	183	59.6825	No
1312	TCF Lef FGF and LDN 1 drift corrected cropped.tif	9	31	241	176	183	183	58.5491	No
1313	TCF Lef FGF and LDN 1 drift corrected cropped.tif	9	32	241	174	183	183	58.8558	No
1314	TCF Lef FGF and LDN 1 drift corrected cropped.tif	9	33	241	174	183	183	58.8558	No
1315	TCF Lef FGF and LDN 1 drift corrected cropped.tif	9	34	243	174	183	183	60.8276	No
1316	TCF Lef FGF and LDN 1 drift corrected cropped.tif	9	35	243	175	183	183	60.6712	No
1317	TCF Lef FGF and LDN 1 drift corrected cropped.tif	9	36	242	172	182	182	60.208	No
1318	TCF Lef FGF and LDN 1 drift corrected cropped.tif	9	37	241	170	182	182	59.4138	No
1319	TCF Lef FGF and LDN 1 drift corrected cropped.tif	9	38	241	171	182	182	59.3043	No
1320	TCF Lef FGF and LDN 1 drift corrected cropped.tif	9	39	241	171	182	182	59.3043	No
1321	TCF Lef FGF and LDN 1 drift corrected cropped.tif	9	40	242	171	182	182	60.2993	No
1322	TCF Lef FGF and LDN 1 drift corrected cropped.tif	9	41	242	171	182	182	60.2993	No
1323	TCF Lef FGF and LDN 1 drift corrected cropped.tif	9	42	243	170	182	182	61.4003	No
1324	TCF Lef FGF and LDN 1 drift corrected cropped.tif	9	43	243	170	182	182	61.4003	No
1325	TCF Lef FGF and LDN 1 drift corrected cropped.tif	9	44	245	172	183	183	63.1506	No
1326	TCF Lef FGF and LDN 1 drift corrected cropped.tif	9	45	245	172	183	183	63.1506	No
1327	TCF Lef FGF and LDN 1 drift corrected cropped.tif	9	46	245	171	182	182	63.2851	No
1328	TCF Lef FGF and LDN 1 drift corrected cropped.tif	9	47	248	172	183	183	66.0984	No
1329	TCF Lef FGF and LDN 1 drift corrected cropped.tif	9	48	248	172	183	183	66.0984	No
1330	TCF Lef FGF and LDN 1 drift corrected cropped.tif	9	49	250	174	183	183	67.7422	No
1331	TCF Lef FGF and LDN 1 drift corrected cropped.tif	9	50	248	174	183	183	65.7647	No
1332	TCF Lef FGF and LDN 1 drift corrected cropped.tif	9	51	248	174	183	183	65.7647	No
1333	TCF Lef FGF and LDN 1 drift corrected cropped.tif	9	52	247	174	183	183	64.7765	No
1334	TCF Lef FGF and LDN 1 drift corrected cropped.tif	9	53	244	176	183	183	61.5224	No
1335	TCF Lef FGF and LDN 1 drift corrected cropped.tif	9	54	243	177	183	183	60.407	No
1336	TCF Lef FGF and LDN 1 drift corrected cropped.tif	9	55	246	175	183	183	63.6396	No
1337	TCF Lef FGF and LDN 1 drift corrected cropped.tif	9	56	245	175	183	183	62.6498	No
1338	TCF Lef FGF and LDN 1 drift corrected cropped.tif	9	57	247	178	183	183	64.2806	No
1339	TCF Lef FGF and LDN 1 drift corrected cropped.tif	9	58	246	178	183	183	63.2851	No
1340	TCF Lef FGF and LDN 1 drift corrected cropped.tif	9	59	245	178	183	183	62.2896	No
1341	TCF Lef FGF and LDN 1 drift corrected cropped.tif	9	60	245	178	183	183	62.2896	No
1342	TCF Lef FGF and LDN 1 drift corrected cropped.tif	9	61	245	180	183	183	62.1289	No
1343	TCF Lef FGF and LDN 1 drift corrected cropped.tif	9	62	245	178	183	183	62.2896	No
1344	TCF Lef FGF and LDN 1 drift corrected cropped.tif	9	63	248	177	183	183	65.3758	No
1345	TCF Lef FGF and LDN 1 drift corrected cropped.tif	9	64	246	177	183	183	63.3877	No
1346	TCF Lef FGF and LDN 1 drift corrected cropped.tif	9	65	245	178	183	183	62.2896	No
1347	TCF Lef FGF and LDN 1 drift corrected cropped.tif	9	66	247	178	183	183	64.2806	No
1348	TCF Lef FGF and LDN 1 drift corrected cropped.tif	9	67	247	178	183	183	64.2806	No
1349	TCF Lef FGF and LDN 1 drift corrected cropped.tif	9	68	247	178	183	183	64.2806	No
1350	TCF Lef FGF and LDN 1 drift corrected cropped.tif	9	69	245	178	183	183	62.2896	No
1351	TCF Lef FGF and LDN 1 drift corrected cropped.tif	9	70	240	173	183	183	58.0517	No
1352	TCF Lef FGF and LDN 1 drift corrected cropped.tif	9	71	238	172	182	182	56.2228	No
1353	TCF Lef FGF and LDN 1 drift corrected cropped.tif	9	72	238	169	182	182	56.5685	No
1354	TCF Lef FGF and LDN 1 drift corrected cropped.tif	9	73	238	169	182	182	56.5685	No
1355	TCF Lef FGF and LDN 1 drift corrected cropped.tif	9	74	237	171	182	182	55.3263	No
1356	TCF Lef FGF and LDN 1 drift corrected cropped.tif	9	75	237	172	182	182	55.2268	No
1357	TCF Lef FGF and LDN 1 drift corrected cropped.tif	9	76	239	172	182	182	57.2189	No
1358	TCF Lef FGF and LDN 1 drift corrected cropped.tif	9	77	238	172	182	182	56.2228	No
1359	TCF Lef FGF and LDN 1 drift corrected cropped.tif	9	78	238	172	182	182	56.2228	No
1360	TCF Lef FGF and LDN 1 drift corrected cropped.tif	9	79	237	172	182	182	55.2268	No
1361	TCF Lef FGF and LDN 1 drift corrected cropped.tif	9	80	237	172	182	182	55.2268	No
1362	TCF Lef FGF and LDN 1 drift corrected cropped.tif	9	81	237	172	182	182	55.2268	No
1363	TCF Lef FGF and LDN 1 drift corrected cropped.tif	9	82	238	172	182	182	56.2228	No
1364	TCF Lef FGF and LDN 1 drift corrected cropped.tif	9	83	238	172	182	182	56.2228	No
1365	TCF Lef FGF and LDN 1 drift corrected cropped.tif	9	84	238	172	182	182	56.2228	No
1366	TCF Lef FGF and LDN 1 drift corrected cropped.tif	9	85	238	172	182	182	56.2228	No
1367	TCF Lef FGF and LDN 1 drift corrected cropped.tif	9	86	238	175	183	183	55.7315	No
1368	TCF Lef FGF and LDN 1 drift corrected cropped.tif	9	87	234	176	183	183	51.6236	No
1369	TCF Lef FGF and LDN 1 drift corrected cropped.tif	9	88	232	178	183	183	49.366	No
1370	TCF Lef FGF and LDN 1 drift corrected cropped.tif	9	89	232	178	183	183	49.366	No
1371	TCF Lef FGF and LDN 1 drift corrected cropped.tif	9	90	232	175	183	183	49.8197	No
1372	TCF Lef FGF and LDN 1 drift corrected cropped.tif	9	91	232	175	183	183	49.8197	No
1373	TCF Lef FGF and LDN 1 drift corrected cropped.tif	9	92	231	174	183	183	49.0306	No
1374	TCF Lef FGF and LDN 1 drift corrected cropped.tif	9	93	229	174	183	183	47.0744	No
1375	TCF Lef FGF and LDN 1 drift corrected cropped.tif	9	94	225	174	182	182	43.1045	No
1376	TCF Lef FGF and LDN 1 drift corrected cropped.tif	9	95	226	175	183	183	43.9318	No
1377	TCF Lef FGF and LDN 1 drift corrected cropped.tif	9	96	220	176	183	183	37.855	No
1378	TCF Lef FGF and LDN 1 drift corrected cropped.tif	9	97	220	176	183	183	37.855	No
1379	TCF Lef FGF and LDN 1 drift corrected cropped.tif	9	98	222	177	183	183	39.6232	No
1380	TCF Lef FGF and LDN 1 drift corrected cropped.tif	9	99	221	175	182	182	39.0512	No
1381	TCF Lef FGF and LDN 1 drift corrected cropped.tif	9	100	220	175	182	182	38.0526	No
1382	TCF Lef FGF and LDN 1 drift corrected cropped.tif	9	101	220	175	182	182	38.0526	No
1383	TCF Lef FGF and LDN 1 drift corrected cropped.tif	9	102	218	176	183	183	35.9026	No
1384	TCF Lef FGF and LDN 1 drift corrected cropped.tif	9	103	218	176	183	183	35.9026	No
1385	TCF Lef FGF and LDN 1 drift corrected cropped.tif	9	104	218	176	183	183	35.9026	No
1386	TCF Lef FGF and LDN 1 drift corrected cropped.tif	9	105	218	176	183	183	35.9026	No
1387	TCF Lef FGF and LDN 1 drift corrected cropped.tif	9	106	218	175	182	182	36.0555	No
1388	TCF Lef FGF and LDN 1 drift corrected cropped.tif	9	107	217	175	182	182	35.0571	No
1389	TCF Lef FGF and LDN 1 drift corrected cropped.tif	9	108	220	172	182	182	38.3275	No
1390	TCF Lef FGF and LDN 1 drift corrected cropped.tif	9	109	219	172	182	182	37.3363	No
1391	TCF Lef FGF and LDN 1 drift corrected cropped.tif	10	1	190	284	193	193	4.2426	Yes
1392	TCF Lef FGF and LDN 1 drift corrected cropped.tif	10	2	192	285	194	194	3.6056	Yes
1393	TCF Lef FGF and LDN 1 drift corrected cropped.tif	10	3	192	284	194	194	2.8284	Yes
1394	TCF Lef FGF and LDN 1 drift corrected cropped.tif	10	4	192	282	193	193	1.4142	Yes
1395	TCF Lef FGF and LDN 1 drift corrected cropped.tif	10	5	192	284	194	194	2.8284	Yes
1396	TCF Lef FGF and LDN 1 drift corrected cropped.tif	10	6	191	279	193	193	2	Yes
1397	TCF Lef FGF and LDN 1 drift corrected cropped.tif	10	7	191	282	193	193	2.2361	Yes
1398	TCF Lef FGF and LDN 1 drift corrected cropped.tif	10	8	191	282	193	193	2.2361	Yes
1399	TCF Lef FGF and LDN 1 drift corrected cropped.tif	10	9	191	282	193	193	2.2361	Yes
1400	TCF Lef FGF and LDN 1 drift corrected cropped.tif	10	10	191	281	193	193	2	Yes
1401	TCF Lef FGF and LDN 1 drift corrected cropped.tif	10	11	195	277	193	193	2.2361	Yes
1402	TCF Lef FGF and LDN 1 drift corrected cropped.tif	10	12	193	269	191	191	2	Yes
1403	TCF Lef FGF and LDN 1 drift corrected cropped.tif	10	13	195	270	192	192	3.1623	Yes
1404	TCF Lef FGF and LDN 1 drift corrected cropped.tif	10	14	193	274	192	192	1	Yes
1405	TCF Lef FGF and LDN 1 drift corrected cropped.tif	10	15	197	278	193	193	4	Yes
1406	TCF Lef FGF and LDN 1 drift corrected cropped.tif	10	16	199	279	195	195	5.6569	Yes
1407	TCF Lef FGF and LDN 1 drift corrected cropped.tif	10	17	199	279	195	195	5.6569	Yes
1408	TCF Lef FGF and LDN 1 drift corrected cropped.tif	10	18	198	280	195	195	4.2426	Yes
1409	TCF Lef FGF and LDN 1 drift corrected cropped.tif	10	19	197	278	193	193	4	Yes
1410	TCF Lef FGF and LDN 1 drift corrected cropped.tif	10	20	197	282	195	195	2.2361	Yes
1411	TCF Lef FGF and LDN 1 drift corrected cropped.tif	10	21	195	282	194	194	1	Yes
1412	TCF Lef FGF and LDN 1 drift corrected cropped.tif	10	22	196	282	195	195	1.4142	Yes
1413	TCF Lef FGF and LDN 1 drift corrected cropped.tif	10	23	196	281	194	194	2.2361	Yes
1414	TCF Lef FGF and LDN 1 drift corrected cropped.tif	10	24	197	278	193	193	4	Yes
1415	TCF Lef FGF and LDN 1 drift corrected cropped.tif	10	25	199	278	193	193	6	Yes
1416	TCF Lef FGF and LDN 1 drift corrected cropped.tif	10	26	199	278	193	193	6	Yes
1417	TCF Lef FGF and LDN 1 drift corrected cropped.tif	10	27	201	277	193	193	8.0623	Yes
1418	TCF Lef FGF and LDN 1 drift corrected cropped.tif	10	28	200	279	195	195	6.4031	Yes
1419	TCF Lef FGF and LDN 1 drift corrected cropped.tif	10	29	197	279	193	193	4	Yes
1420	TCF Lef FGF and LDN 1 drift corrected cropped.tif	10	30	197	278	193	193	4	Yes
1421	TCF Lef FGF and LDN 1 drift corrected cropped.tif	10	31	197	279	193	193	4	Yes
1422	TCF Lef FGF and LDN 1 drift corrected cropped.tif	10	32	201	276	193	193	8.2462	Yes
1423	TCF Lef FGF and LDN 1 drift corrected cropped.tif	10	33	201	275	193	193	8.544	Yes
1424	TCF Lef FGF and LDN 1 drift corrected cropped.tif	10	34	197	274	192	192	5	Yes
1425	TCF Lef FGF and LDN 1 drift corrected cropped.tif	10	35	198	271	192	192	6	Yes
1426	TCF Lef FGF and LDN 1 drift corrected cropped.tif	10	36	198	271	192	192	6	Yes
1427	TCF Lef FGF and LDN 1 drift corrected cropped.tif	10	37	200	277	193	193	7.0711	Yes
1428	TCF Lef FGF and LDN 1 drift corrected cropped.tif	10	38	198	283	196	196	2.2361	Yes
1429	TCF Lef FGF and LDN 1 drift corrected cropped.tif	10	39	196	286	197	197	1	Yes
1430	TCF Lef FGF and LDN 1 drift corrected cropped.tif	10	40	197	286	197	197	0	Yes
1431	TCF Lef FGF and LDN 1 drift corrected cropped.tif	10	41	197	285	197	197	0	Yes
1432	TCF Lef FGF and LDN 1 drift corrected cropped.tif	10	42	197	285	197	197	0	Yes
1433	TCF Lef FGF and LDN 1 drift corrected cropped.tif	10	43	197	284	196	196	1	Yes
1434	TCF Lef FGF and LDN 1 drift corrected cropped.tif	10	44	197	285	197	197	0	Yes
1435	TCF Lef FGF and LDN 1 drift corrected cropped.tif	10	45	197	287	197	197	1	Yes
1436	TCF Lef FGF and LDN 1 drift corrected cropped.tif	10	46	195	290	198	198	4.2426	Yes
1437	TCF Lef FGF and LDN 1 drift corrected cropped.tif	10	47	192	289	197	197	5.831	Yes
1438	TCF Lef FGF and LDN 1 drift corrected cropped.tif	10	48	192	291	197	197	7.0711	Yes
1439	TCF Lef FGF and LDN 1 drift corrected cropped.tif	10	49	192	291	197	197	7.0711	Yes
1440	TCF Lef FGF and LDN 1 drift corrected cropped.tif	10	50	192	291	197	197	7.0711	Yes
1441	TCF Lef FGF and LDN 1 drift corrected cropped.tif	10	51	193	291	197	197	6.4031	Yes
1442	TCF Lef FGF and LDN 1 drift corrected cropped.tif	10	52	193	291	197	197	6.4031	Yes
1443	TCF Lef FGF and LDN 1 drift corrected cropped.tif	10	53	193	291	197	197	6.4031	Yes
1444	TCF Lef FGF and LDN 1 drift corrected cropped.tif	10	54	192	294	198	198	9.2195	Yes
1445	TCF Lef FGF and LDN 1 drift corrected cropped.tif	10	55	192	294	198	198	9.2195	Yes
1446	TCF Lef FGF and LDN 1 drift corrected cropped.tif	10	56	193	294	199	199	8.4853	Yes
1447	TCF Lef FGF and LDN 1 drift corrected cropped.tif	10	57	194	293	199	199	7.0711	Yes
1448	TCF Lef FGF and LDN 1 drift corrected cropped.tif	10	58	194	293	199	199	7.0711	Yes
1449	TCF Lef FGF and LDN 1 drift corrected cropped.tif	10	59	195	294	200	200	7.0711	Yes
1450	TCF Lef FGF and LDN 1 drift corrected cropped.tif	10	60	195	294	200	200	7.0711	Yes
1451	TCF Lef FGF and LDN 1 drift corrected cropped.tif	10	61	195	294	200	200	7.0711	Yes
1452	TCF Lef FGF and LDN 1 drift corrected cropped.tif	10	62	195	294	200	200	7.0711	Yes
1453	TCF Lef FGF and LDN 1 drift corrected cropped.tif	10	63	193	295	199	199	9.2195	Yes
1454	TCF Lef FGF and LDN 1 drift corrected cropped.tif	10	64	192	296	199	199	10.6301	Yes
1455	TCF Lef FGF and LDN 1 drift corrected cropped.tif	10	65	192	299	203	203	12.53	Yes
1456	TCF Lef FGF and LDN 1 drift corrected cropped.tif	10	66	191	302	203	203	15	Yes
1457	TCF Lef FGF and LDN 1 drift corrected cropped.tif	10	67	191	302	203	203	15	Yes
1458	TCF Lef FGF and LDN 1 drift corrected cropped.tif	10	68	189	305	203	203	18.4391	Yes
1459	TCF Lef FGF and LDN 1 drift corrected cropped.tif	10	69	187	303	203	203	18.868	Yes
1460	TCF Lef FGF and LDN 1 drift corrected cropped.tif	10	70	187	302	203	203	18.3576	Yes
1461	TCF Lef FGF and LDN 1 drift corrected cropped.tif	10	71	187	302	203	203	18.3576	Yes
1462	TCF Lef FGF and LDN 1 drift corrected cropped.tif	10	72	187	302	203	203	18.3576	Yes
1463	TCF Lef FGF and LDN 1 drift corrected cropped.tif	10	73	187	302	203	203	18.3576	Yes
1464	TCF Lef FGF and LDN 1 drift corrected cropped.tif	10	74	189	302	203	203	16.6433	Yes
1465	TCF Lef FGF and LDN 1 drift corrected cropped.tif	10	75	191	305	203	203	16.9706	Yes
1466	TCF Lef FGF and LDN 1 drift corrected cropped.tif	10	76	192	304	203	203	15.5563	Yes
1467	TCF Lef FGF and LDN 1 drift corrected cropped.tif	10	77	193	304	203	203	14.8661	Yes
1468	TCF Lef FGF and LDN 1 drift corrected cropped.tif	10	78	193	304	203	203	14.8661	Yes
1469	TCF Lef FGF and LDN 1 drift corrected cropped.tif	10	79	193	304	203	203	14.8661	Yes
1470	TCF Lef FGF and LDN 1 drift corrected cropped.tif	10	80	193	304	203	203	14.8661	Yes
1471	TCF Lef FGF and LDN 1 drift corrected cropped.tif	10	81	192	302	203	203	14.2127	Yes
1472	TCF Lef FGF and LDN 1 drift corrected cropped.tif	10	82	192	297	200	200	11.3137	Yes
1473	TCF Lef FGF and LDN 1 drift corrected cropped.tif	10	83	189	296	198	198	12.7279	Yes
1474	TCF Lef FGF and LDN 1 drift corrected cropped.tif	10	84	190	295	198	198	11.3137	Yes
1475	TCF Lef FGF and LDN 1 drift corrected cropped.tif	10	85	192	294	198	198	9.2195	Yes
1476	TCF Lef FGF and LDN 1 drift corrected cropped.tif	10	86	193	294	199	199	8.4853	Yes
1477	TCF Lef FGF and LDN 1 drift corrected cropped.tif	10	87	193	294	199	199	8.4853	Yes
1478	TCF Lef FGF and LDN 1 drift corrected cropped.tif	10	88	193	294	199	199	8.4853	Yes
1479	TCF Lef FGF and LDN 1 drift corrected cropped.tif	10	89	194	296	200	200	9.2195	Yes
1480	TCF Lef FGF and LDN 1 drift corrected cropped.tif	10	90	194	296	200	200	9.2195	Yes
1481	TCF Lef FGF and LDN 1 drift corrected cropped.tif	10	91	195	294	200	200	7.0711	Yes
1482	TCF Lef FGF and LDN 1 drift corrected cropped.tif	10	92	194	295	200	200	8.4853	Yes
1483	TCF Lef FGF and LDN 1 drift corrected cropped.tif	10	93	194	295	200	200	8.4853	Yes
1484	TCF Lef FGF and LDN 1 drift corrected cropped.tif	10	94	192	295	199	199	9.8995	Yes
1485	TCF Lef FGF and LDN 1 drift corrected cropped.tif	10	95	192	294	198	198	9.2195	Yes
1486	TCF Lef FGF and LDN 1 drift corrected cropped.tif	10	96	190	293	197	197	9.8995	Yes
1487	TCF Lef FGF and LDN 1 drift corrected cropped.tif	10	97	190	291	197	197	8.6023	Yes
1488	TCF Lef FGF and LDN 1 drift corrected cropped.tif	10	98	190	291	197	197	8.6023	Yes
1489	TCF Lef FGF and LDN 1 drift corrected cropped.tif	10	99	190	290	197	197	8.0623	Yes
1490	TCF Lef FGF and LDN 1 drift corrected cropped.tif	10	100	190	290	197	197	8.0623	Yes
1491	TCF Lef FGF and LDN 1 drift corrected cropped.tif	10	101	190	290	197	197	8.0623	Yes
1492	TCF Lef FGF and LDN 1 drift corrected cropped.tif	10	102	191	290	197	197	7.2111	Yes
1493	TCF Lef FGF and LDN 1 drift corrected cropped.tif	11	1	272	39	172	172	141.421	No
1494	TCF Lef FGF and LDN 1 drift corrected cropped.tif	11	2	276	39	172	172	144.278	No
1495	TCF Lef FGF and LDN 1 drift corrected cropped.tif	11	3	277	39	172	172	145	No
1496	TCF Lef FGF and LDN 1 drift corrected cropped.tif	11	4	276	39	172	172	144.278	No
1497	TCF Lef FGF and LDN 1 drift corrected cropped.tif	11	5	279	40	172	172	145.774	No
1498	TCF Lef FGF and LDN 1 drift corrected cropped.tif	11	6	279	40	172	172	145.774	No
1499	TCF Lef FGF and LDN 1 drift corrected cropped.tif	11	7	279	43	172	172	143.753	No
1500	TCF Lef FGF and LDN 1 drift corrected cropped.tif	11	8	279	43	172	172	143.753	No
1501	TCF Lef FGF and LDN 1 drift corrected cropped.tif	11	9	279	40	172	172	145.774	No
1502	TCF Lef FGF and LDN 1 drift corrected cropped.tif	11	10	277	40	172	172	144.312	No
1503	TCF Lef FGF and LDN 1 drift corrected cropped.tif	11	11	274	41	172	172	141.45	No
1504	TCF Lef FGF and LDN 1 drift corrected cropped.tif	11	12	279	43	172	172	143.753	No
1505	TCF Lef FGF and LDN 1 drift corrected cropped.tif	11	13	279	43	172	172	143.753	No
1506	TCF Lef FGF and LDN 1 drift corrected cropped.tif	11	14	274	39	172	172	142.843	No
1507	TCF Lef FGF and LDN 1 drift corrected cropped.tif	11	15	276	40	172	172	143.586	No
1508	TCF Lef FGF and LDN 1 drift corrected cropped.tif	11	16	274	40	172	172	142.144	No
1509	TCF Lef FGF and LDN 1 drift corrected cropped.tif	11	17	274	40	172	172	142.144	No
1510	TCF Lef FGF and LDN 1 drift corrected cropped.tif	11	18	274	39	172	172	142.843	No
1511	TCF Lef FGF and LDN 1 drift corrected cropped.tif	11	19	277	36	172	172	147.085	No
1512	TCF Lef FGF and LDN 1 drift corrected cropped.tif	11	20	283	43	172	172	146.755	No
1513	TCF Lef FGF and LDN 1 drift corrected cropped.tif	11	21	277	42	172	172	142.947	No
1514	TCF Lef FGF and LDN 1 drift corrected cropped.tif	11	22	277	36	172	172	147.085	No
1515	TCF Lef FGF and LDN 1 drift corrected cropped.tif	11	23	277	44	172	172	141.598	No
1516	TCF Lef FGF and LDN 1 drift corrected cropped.tif	11	24	277	44	172	172	141.598	No
1517	TCF Lef FGF and LDN 1 drift corrected cropped.tif	11	25	278	40	172	172	145.041	No
1518	TCF Lef FGF and LDN 1 drift corrected cropped.tif	11	26	277	40	172	172	144.312	No
1519	TCF Lef FGF and LDN 1 drift corrected cropped.tif	11	27	277	39	172	172	145	No
1520	TCF Lef FGF and LDN 1 drift corrected cropped.tif	11	28	279	38	172	172	147.139	No
1521	TCF Lef FGF and LDN 1 drift corrected cropped.tif	11	29	277	40	172	172	144.312	No
1522	TCF Lef FGF and LDN 1 drift corrected cropped.tif	11	30	277	39	172	172	145	No
1523	TCF Lef FGF and LDN 1 drift corrected cropped.tif	11	31	277	39	172	172	145	No
1524	TCF Lef FGF and LDN 1 drift corrected cropped.tif	11	32	273	38	172	172	142.836	No
1525	TCF Lef FGF and LDN 1 drift corrected cropped.tif	11	33	273	38	172	172	142.836	No
1526	TCF Lef FGF and LDN 1 drift corrected cropped.tif	11	34	274	39	172	172	142.843	No
1527	TCF Lef FGF and LDN 1 drift corrected cropped.tif	11	35	274	39	172	172	142.843	No
1528	TCF Lef FGF and LDN 1 drift corrected cropped.tif	11	36	274	40	172	172	142.144	No
1529	TCF Lef FGF and LDN 1 drift corrected cropped.tif	11	37	274	41	172	172	141.45	No
1530	TCF Lef FGF and LDN 1 drift corrected cropped.tif	11	38	274	42	172	172	140.759	No
1531	TCF Lef FGF and LDN 1 drift corrected cropped.tif	11	39	273	39	172	172	142.13	No
1532	TCF Lef FGF and LDN 1 drift corrected cropped.tif	11	40	273	39	172	172	142.13	No
1533	TCF Lef FGF and LDN 1 drift corrected cropped.tif	11	41	272	39	172	172	141.421	No
1534	TCF Lef FGF and LDN 1 drift corrected cropped.tif	11	42	272	39	172	172	141.421	No
1535	TCF Lef FGF and LDN 1 drift corrected cropped.tif	11	43	272	39	172	172	141.421	No
1536	TCF Lef FGF and LDN 1 drift corrected cropped.tif	11	44	272	39	172	172	141.421	No
1537	TCF Lef FGF and LDN 1 drift corrected cropped.tif	11	45	272	40	172	172	140.716	No
1538	TCF Lef FGF and LDN 1 drift corrected cropped.tif	11	46	271	43	172	172	137.902	No
1539	TCF Lef FGF and LDN 1 drift corrected cropped.tif	11	47	274	43	172	172	140.071	No
1540	TCF Lef FGF and LDN 1 drift corrected cropped.tif	11	48	274	42	172	172	140.759	No
1541	TCF Lef FGF and LDN 1 drift corrected cropped.tif	11	49	275	42	172	172	141.485	No
1542	TCF Lef FGF and LDN 1 drift corrected cropped.tif	11	50	276	41	172	172	142.899	No
1543	TCF Lef FGF and LDN 1 drift corrected cropped.tif	11	51	274	41	172	172	141.45	No
1544	TCF Lef FGF and LDN 1 drift corrected cropped.tif	11	52	273	39	172	172	142.13	No
1545	TCF Lef FGF and LDN 1 drift corrected cropped.tif	11	53	273	39	172	172	142.13	No
1546	TCF Lef FGF and LDN 1 drift corrected cropped.tif	11	54	273	42	172	172	140.036	No
1547	TCF Lef FGF and LDN 1 drift corrected cropped.tif	11	55	273	44	172	172	138.658	No
1548	TCF Lef FGF and LDN 1 drift corrected cropped.tif	11	56	273	44	172	172	138.658	No
1549	TCF Lef FGF and LDN 1 drift corrected cropped.tif	11	57	274	48	172	172	136.693	No
1550	TCF Lef FGF and LDN 1 drift corrected cropped.tif	11	58	275	50	172	172	136.125	No
1551	TCF Lef FGF and LDN 1 drift corrected cropped.tif	11	59	277	42	172	172	142.947	No
1552	TCF Lef FGF and LDN 1 drift corrected cropped.tif	11	60	272	42	172	172	139.316	No
1553	TCF Lef FGF and LDN 1 drift corrected cropped.tif	11	61	270	42	172	172	137.888	No
1554	TCF Lef FGF and LDN 1 drift corrected cropped.tif	11	62	268	42	172	172	136.473	No
1555	TCF Lef FGF and LDN 1 drift corrected cropped.tif	11	63	272	42	172	172	139.316	No
1556	TCF Lef FGF and LDN 1 drift corrected cropped.tif	11	64	272	42	172	172	139.316	No
1557	TCF Lef FGF and LDN 1 drift corrected cropped.tif	11	65	271	37	172	172	142.144	No
1558	TCF Lef FGF and LDN 1 drift corrected cropped.tif	11	66	271	41	172	172	139.302	No
1559	TCF Lef FGF and LDN 1 drift corrected cropped.tif	11	67	273	42	172	172	140.036	No
1560	TCF Lef FGF and LDN 1 drift corrected cropped.tif	11	68	273	42	172	172	140.036	No
1561	TCF Lef FGF and LDN 1 drift corrected cropped.tif	11	69	273	42	172	172	140.036	No
1562	TCF Lef FGF and LDN 1 drift corrected cropped.tif	11	70	272	42	172	172	139.316	No
1563	TCF Lef FGF and LDN 1 drift corrected cropped.tif	11	71	271	46	172	172	135.831	No
1564	TCF Lef FGF and LDN 1 drift corrected cropped.tif	11	72	273	45	172	172	137.975	No
1565	TCF Lef FGF and LDN 1 drift corrected cropped.tif	11	73	273	47	172	172	136.62	No
1566	TCF Lef FGF and LDN 1 drift corrected cropped.tif	11	74	273	47	172	172	136.62	No
1567	TCF Lef FGF and LDN 1 drift corrected cropped.tif	11	75	272	46	172	172	136.561	No
1568	TCF Lef FGF and LDN 1 drift corrected cropped.tif	11	76	272	46	172	172	136.561	No
1569	TCF Lef FGF and LDN 1 drift corrected cropped.tif	11	77	272	46	172	172	136.561	No
1570	TCF Lef FGF and LDN 1 drift corrected cropped.tif	11	78	272	47	172	172	135.882	No
1571	TCF Lef FGF and LDN 1 drift corrected cropped.tif	11	79	274	47	172	172	137.361	No
1572	TCF Lef FGF and LDN 1 drift corrected cropped.tif	11	80	273	46	172	172	137.295	No
1573	TCF Lef FGF and LDN 1 drift corrected cropped.tif	11	81	275	45	172	172	139.445	No
1574	TCF Lef FGF and LDN 1 drift corrected cropped.tif	11	82	275	43	172	172	140.801	No
1575	TCF Lef FGF and LDN 1 drift corrected cropped.tif	11	83	275	46	172	172	138.773	No
1576	TCF Lef FGF and LDN 1 drift corrected cropped.tif	11	84	275	46	172	172	138.773	No
1577	TCF Lef FGF and LDN 1 drift corrected cropped.tif	11	85	275	45	172	172	139.445	No
1578	TCF Lef FGF and LDN 1 drift corrected cropped.tif	11	86	274	45	172	172	138.708	No
1579	TCF Lef FGF and LDN 1 drift corrected cropped.tif	11	87	274	45	172	172	138.708	No
1580	TCF Lef FGF and LDN 1 drift corrected cropped.tif	11	88	272	45	172	172	137.244	No
1581	TCF Lef FGF and LDN 1 drift corrected cropped.tif	11	89	271	45	172	172	136.517	No
1582	TCF Lef FGF and LDN 1 drift corrected cropped.tif	11	90	271	45	172	172	136.517	No
1583	TCF Lef FGF and LDN 1 drift corrected cropped.tif	11	91	271	45	172	172	136.517	No
1584	TCF Lef FGF and LDN 1 drift corrected cropped.tif	11	92	270	46	172	172	135.104	No
1585	TCF Lef FGF and LDN 1 drift corrected cropped.tif	11	93	271	46	172	172	135.831	No
1586	TCF Lef FGF and LDN 1 drift corrected cropped.tif	11	94	277	39	172	172	145	No
1587	TCF Lef FGF and LDN 1 drift corrected cropped.tif	11	95	277	40	172	172	144.312	No
1588	TCF Lef FGF and LDN 1 drift corrected cropped.tif	11	96	277	42	172	172	142.947	No
1589	TCF Lef FGF and LDN 1 drift corrected cropped.tif	11	97	275	39	172	172	143.558	No
1590	TCF Lef FGF and LDN 1 drift corrected cropped.tif	11	98	277	36	172	172	147.085	No
1591	TCF Lef FGF and LDN 1 drift corrected cropped.tif	11	99	277	37	172	172	146.387	No
1592	TCF Lef FGF and LDN 1 drift corrected cropped.tif	11	100	277	36	172	172	147.085	No
1593	TCF Lef FGF and LDN 1 drift corrected cropped.tif	11	101	277	36	172	172	147.085	No
1594	TCF Lef FGF and LDN 1 drift corrected cropped.tif	11	102	277	36	172	172	147.085	No
1595	TCF Lef FGF and LDN 1 drift corrected cropped.tif	11	103	275	39	172	172	143.558	No
1596	TCF Lef FGF and LDN 1 drift corrected cropped.tif	11	104	276	40	172	172	143.586	No
1597	TCF Lef FGF and LDN 1 drift corrected cropped.tif	11	105	276	42	172	172	142.215	No
1598	TCF Lef FGF and LDN 1 drift corrected cropped.tif	11	106	276	43	172	172	141.534	No
1599	TCF Lef FGF and LDN 1 drift corrected cropped.tif	11	107	276	43	172	172	141.534	No
1600	TCF Lef FGF and LDN 1 drift corrected cropped.tif	11	108	277	42	172	172	142.947	No
1601	TCF Lef FGF and LDN 1 drift corrected cropped.tif	11	109	277	42	172	172	142.947	No
1602	TCF Lef FGF and LDN 1 drift corrected cropped.tif	11	110	277	42	172	172	142.947	No
1603	TCF Lef FGF and LDN 1 drift corrected cropped.tif	11	111	276	42	172	172	142.215	No
1604	TCF Lef FGF and LDN 1 drift corrected cropped.tif	11	112	277	42	172	172	142.947	No
1605	TCF Lef FGF and LDN 1 drift corrected cropped.tif	11	113	275	48	172	172	137.441	No
1606	TCF Lef FGF and LDN 1 drift corrected cropped.tif	11	114	274	50	172	172	135.37	No
1607	TCF Lef FGF and LDN 1 drift corrected cropped.tif	11	115	274	51	172	172	134.714	No
1608	TCF Lef FGF and LDN 1 drift corrected cropped.tif	11	116	274	53	172	172	133.417	No
1609	TCF Lef FGF and LDN 1 drift corrected cropped.tif	11	117	275	53	172	172	134.183	No
1610	TCF Lef FGF and LDN 1 drift corrected cropped.tif	11	118	273	53	172	172	132.654	No
1611	TCF Lef FGF and LDN 1 drift corrected cropped.tif	11	119	269	59	172	172	125.734	No
1612	TCF Lef FGF and LDN 1 drift corrected cropped.tif	11	120	268	59	172	172	124.964	No
1613	TCF Lef FGF and LDN 1 drift corrected cropped.tif	11	121	268	60	172	172	124.326	No
1614	TCF Lef FGF and LDN 1 drift corrected cropped.tif	11	122	268	60	172	172	124.326	No
1615	TCF Lef FGF and LDN 1 drift corrected cropped.tif	11	123	268	60	172	172	124.326	No
1616	TCF Lef FGF and LDN 1 drift corrected cropped.tif	11	124	267	59	172	172	124.197	No
1617	TCF Lef FGF and LDN 1 drift corrected cropped.tif	11	125	267	56	172	172	126.151	No
1618	TCF Lef FGF and LDN 1 drift corrected cropped.tif	11	126	268	55	172	172	127.562	No
1619	TCF Lef FGF and LDN 1 drift corrected cropped.tif	11	127	268	53	172	172	128.887	No
1620	TCF Lef FGF and LDN 1 drift corrected cropped.tif	11	128	268	53	172	172	128.887	No
1621	TCF Lef FGF and LDN 1 drift corrected cropped.tif	11	129	268	52	172	172	129.557	No
1622	TCF Lef FGF and LDN 1 drift corrected cropped.tif	11	130	271	52	172	172	131.795	No
1623	TCF Lef FGF and LDN 1 drift corrected cropped.tif	11	131	271	52	172	172	131.795	No
1624	TCF Lef FGF and LDN 1 drift corrected cropped.tif	11	132	274	52	172	172	134.063	No
1625	TCF Lef FGF and LDN 1 drift corrected cropped.tif	11	133	274	52	172	172	134.063	No
1626	TCF Lef FGF and LDN 1 drift corrected cropped.tif	11	134	274	52	172	172	134.063	No
1627	TCF Lef FGF and LDN 1 drift corrected cropped.tif	11	135	274	52	172	172	134.063	No
1628	TCF Lef FGF and LDN 1 drift corrected cropped.tif	11	136	276	50	172	172	136.883	No
1629	TCF Lef FGF and LDN 1 drift corrected cropped.tif	11	137	276	45	172	172	140.186	No
1630	TCF Lef FGF and LDN 1 drift corrected cropped.tif	11	138	276	44	172	172	140.858	No
1631	TCF Lef FGF and LDN 1 drift corrected cropped.tif	11	139	274	43	172	172	140.071	No
1632	TCF Lef FGF and LDN 1 drift corrected cropped.tif	11	140	274	44	172	172	139.388	No
1633	TCF Lef FGF and LDN 1 drift corrected cropped.tif	11	141	274	43	172	172	140.071	No
1634	TCF Lef FGF and LDN 1 drift corrected cropped.tif	11	142	274	41	172	172	141.45	No
1635	TCF Lef FGF and LDN 1 drift corrected cropped.tif	11	143	272	39	172	172	141.421	No
1636	TCF Lef FGF and LDN 1 drift corrected cropped.tif	11	144	270	42	172	172	137.888	No
1637	TCF Lef FGF and LDN 1 drift corrected cropped.tif	11	145	269	42	172	172	137.179	No
1638	TCF Lef FGF and LDN 1 drift corrected cropped.tif	11	146	269	42	172	172	137.179	No
1639	TCF Lef FGF and LDN 1 drift corrected cropped.tif	11	147	269	42	172	172	137.179	No
1640	TCF Lef FGF and LDN 1 drift corrected cropped.tif	11	148	269	42	172	172	137.179	No
1641	TCF Lef FGF and LDN 1 drift corrected cropped.tif	11	149	268	42	172	172	136.473	No
1642	TCF Lef FGF and LDN 1 drift corrected cropped.tif	11	150	268	42	172	172	136.473	No
1643	TCF Lef FGF and LDN 1 drift corrected cropped.tif	11	151	269	39	172	172	139.316	No
1644	TCF Lef FGF and LDN 1 drift corrected cropped.tif	11	152	268	41	172	172	137.186	No
1645	TCF Lef FGF and LDN 1 drift corrected cropped.tif	11	153	268	39	172	172	138.622	No
1646	TCF Lef FGF and LDN 1 drift corrected cropped.tif	11	154	268	39	172	172	138.622	No
1647	TCF Lef FGF and LDN 1 drift corrected cropped.tif	11	155	267	43	172	172	135.059	No
1648	TCF Lef FGF and LDN 1 drift corrected cropped.tif	11	156	266	44	172	172	133.645	No
1649	TCF Lef FGF and LDN 1 drift corrected cropped.tif	11	157	267	42	172	172	135.772	No
1650	TCF Lef FGF and LDN 1 drift corrected cropped.tif	11	158	268	41	172	172	137.186	No
1651	TCF Lef FGF and LDN 1 drift corrected cropped.tif	11	159	268	41	172	172	137.186	No
1652	TCF Lef FGF and LDN 1 drift corrected cropped.tif	11	160	268	41	172	172	137.186	No
1653	TCF Lef FGF and LDN 1 drift corrected cropped.tif	11	161	268	41	172	172	137.186	No
1654	TCF Lef FGF and LDN 1 drift corrected cropped.tif	11	162	265	41	172	172	135.104	No
1655	TCF Lef FGF and LDN 1 drift corrected cropped.tif	11	163	262	42	172	172	132.322	No
1656	TCF Lef FGF and LDN 1 drift corrected cropped.tif	11	164	261	43	172	172	130.908	No
1657	TCF Lef FGF and LDN 1 drift corrected cropped.tif	11	165	260	45	172	172	128.763	No
1658	TCF Lef FGF and LDN 1 drift corrected cropped.tif	11	166	259	42	172	172	130.3	No
1659	TCF Lef FGF and LDN 1 drift corrected cropped.tif	11	167	258	41	172	172	130.384	No
1660	TCF Lef FGF and LDN 1 drift corrected cropped.tif	11	168	256	42	172	172	128.316	No
1661	TCF Lef FGF and LDN 1 drift corrected cropped.tif	11	169	256	42	172	172	128.316	No
1662	TCF Lef FGF and LDN 1 drift corrected cropped.tif	11	170	255	41	172	172	128.425	No
1663	TCF Lef FGF and LDN 1 drift corrected cropped.tif	11	171	257	45	172	172	126.732	No
1664	TCF Lef FGF and LDN 1 drift corrected cropped.tif	11	172	254	46	172	172	123.988	No
1665	TCF Lef FGF and LDN 1 drift corrected cropped.tif	11	173	254	47	172	172	123.24	No
1666	TCF Lef FGF and LDN 1 drift corrected cropped.tif	11	174	254	44	172	172	125.495	No
1667	TCF Lef FGF and LDN 1 drift corrected cropped.tif	11	175	253	43	172	172	125.606	No
1668	TCF Lef FGF and LDN 1 drift corrected cropped.tif	11	176	251	46	172	172	122.025	No
1669	TCF Lef FGF and LDN 1 drift corrected cropped.tif	11	177	249	50	172	172	117.686	No
1670	TCF Lef FGF and LDN 1 drift corrected cropped.tif	11	178	246	53	172	172	113.455	No
1671	TCF Lef FGF and LDN 1 drift corrected cropped.tif	11	179	240	52	172	172	110.422	No
1672	TCF Lef FGF and LDN 1 drift corrected cropped.tif	11	180	240	53	172	172	109.636	No
1673	TCF Lef FGF and LDN 1 drift corrected cropped.tif	11	181	241	54	172	172	109.481	No
1674	TCF Lef FGF and LDN 1 drift corrected cropped.tif	11	182	240	55	172	172	108.074	No
1675	TCF Lef FGF and LDN 1 drift corrected cropped.tif	11	183	238	54	172	172	107.615	No
1676	TCF Lef FGF and LDN 1 drift corrected cropped.tif	11	184	237	53	172	172	107.801	No
1677	TCF Lef FGF and LDN 1 drift corrected cropped.tif	11	185	237	53	172	172	107.801	No
1678	TCF Lef FGF and LDN 1 drift corrected cropped.tif	11	186	236	53	172	172	107.201	No
1679	TCF Lef FGF and LDN 1 drift corrected cropped.tif	11	187	234	54	172	172	105.209	No
1680	TCF Lef FGF and LDN 1 drift corrected cropped.tif	11	188	226	59	172	172	96.5194	No
1681	TCF Lef FGF and LDN 1 drift corrected cropped.tif	11	189	226	63	172	172	93.2309	No
1682	TCF Lef FGF and LDN 1 drift corrected cropped.tif	11	190	227	63	172	172	93.8136	No
1683	TCF Lef FGF and LDN 1 drift corrected cropped.tif	11	191	228	63	172	172	94.4034	No
1684	TCF Lef FGF and LDN 1 drift corrected cropped.tif	11	192	227	65	172	172	92.2009	No
1685	TCF Lef FGF and LDN 1 drift corrected cropped.tif	11	193	229	66	172	172	92.6175	No
1686	TCF Lef FGF and LDN 1 drift corrected cropped.tif	11	194	230	67	172	172	92.4554	No
1687	TCF Lef FGF and LDN 1 drift corrected cropped.tif	11	195	230	67	172	172	92.4554	No
1688	TCF Lef FGF and LDN 1 drift corrected cropped.tif	11	196	226	68	172	172	89.202	No
1689	TCF Lef FGF and LDN 1 drift corrected cropped.tif	11	197	225	69	172	172	87.8009	No
1690	TCF Lef FGF and LDN 1 drift corrected cropped.tif	11	198	223	69	172	172	86.6083	No
1691	TCF Lef FGF and LDN 1 drift corrected cropped.tif	11	199	223	69	172	172	86.6083	No
1692	TCF Lef FGF and LDN 1 drift corrected cropped.tif	11	200	220	72	172	172	82.4197	No
1693	TCF Lef FGF and LDN 1 drift corrected cropped.tif	11	201	217	74	172	172	79.0569	No
1694	TCF Lef FGF and LDN 1 drift corrected cropped.tif	11	202	217	73	172	172	79.8812	No
1695	TCF Lef FGF and LDN 1 drift corrected cropped.tif	11	203	220	77	172	172	78.4092	No
1696	TCF Lef FGF and LDN 1 drift corrected cropped.tif	11	204	219	78	172	172	77.0065	No
1697	TCF Lef FGF and LDN 1 drift corrected cropped.tif	11	205	220	79	172	172	76.8375	No
1698	TCF Lef FGF and LDN 1 drift corrected cropped.tif	11	206	222	80	172	172	77.3369	No
1699	TCF Lef FGF and LDN 1 drift corrected cropped.tif	11	207	222	82	172	172	75.8222	No
1700	TCF Lef FGF and LDN 1 drift corrected cropped.tif	11	208	227	82	172	172	79.2086	No
1701	TCF Lef FGF and LDN 1 drift corrected cropped.tif	11	209	229	87	172	172	77.1557	No
1702	TCF Lef FGF and LDN 1 drift corrected cropped.tif	11	210	228	88	172	172	75.743	No
1703	TCF Lef FGF and LDN 1 drift corrected cropped.tif	11	211	227	90	172	172	73.6614	No
1704	TCF Lef FGF and LDN 1 drift corrected cropped.tif	11	212	226	88	172	172	74.2765	No
1705	TCF Lef FGF and LDN 1 drift corrected cropped.tif	11	213	228	86	172	172	77.1038	No
1706	TCF Lef FGF and LDN 1 drift corrected cropped.tif	11	214	228	86	172	172	77.1038	No
1707	TCF Lef FGF and LDN 1 drift corrected cropped.tif	11	215	227	88	172	172	75.0067	No
1708	TCF Lef FGF and LDN 1 drift corrected cropped.tif	11	216	215	87	172	172	67.4759	No
1709	TCF Lef FGF and LDN 1 drift corrected cropped.tif	11	217	212	87	172	172	65.6049	No
1710	TCF Lef FGF and LDN 1 drift corrected cropped.tif	11	218	212	89	172	172	64.0312	No
1711	TCF Lef FGF and LDN 1 drift corrected cropped.tif	11	219	215	92	172	172	63.7024	No
1712	TCF Lef FGF and LDN 1 drift corrected cropped.tif	11	220	218	93	172	172	65.0538	No
1713	TCF Lef FGF and LDN 1 drift corrected cropped.tif	11	221	217	95	172	172	62.9365	No
1714	TCF Lef FGF and LDN 1 drift corrected cropped.tif	11	222	217	95	172	172	62.9365	No
1715	TCF Lef FGF and LDN 1 drift corrected cropped.tif	11	223	217	96	172	172	62.2415	No
1716	TCF Lef FGF and LDN 1 drift corrected cropped.tif	11	224	217	96	172	172	62.2415	No
1717	TCF Lef FGF and LDN 1 drift corrected cropped.tif	11	225	220	96	172	172	64.4438	No
1718	TCF Lef FGF and LDN 1 drift corrected cropped.tif	11	226	221	95	172	172	65.8559	No
1719	TCF Lef FGF and LDN 1 drift corrected cropped.tif	11	227	221	94	172	172	66.5282	No
1720	TCF Lef FGF and LDN 1 drift corrected cropped.tif	11	228	223	94	172	172	68.0147	No
1721	TCF Lef FGF and LDN 1 drift corrected cropped.tif	11	229	223	88	172	172	72.1249	No
1722	TCF Lef FGF and LDN 1 drift corrected cropped.tif	11	230	223	87	172	172	72.8354	No
1723	TCF Lef FGF and LDN 1 drift corrected cropped.tif	11	231	228	84	172	172	78.492	No
1724	TCF Lef FGF and LDN 1 drift corrected cropped.tif	11	232	226	87	172	172	74.9667	No
1725	TCF Lef FGF and LDN 1 drift corrected cropped.tif	11	233	226	87	172	172	74.9667	No
1726	TCF Lef FGF and LDN 1 drift corrected cropped.tif	11	234	226	90	172	172	72.9178	No
1727	TCF Lef FGF and LDN 1 drift corrected cropped.tif	11	235	226	88	172	172	74.2765	No
1728	TCF Lef FGF and LDN 1 drift corrected cropped.tif	11	236	226	88	172	172	74.2765	No
1729	TCF Lef FGF and LDN 1 drift corrected cropped.tif	11	236	226	90	172	172	72.9178	No
1730	TCF Lef FGF and LDN 1 drift corrected cropped.tif	12	1	19	368	193	193	194.538	No
1731	TCF Lef FGF and LDN 1 drift corrected cropped.tif	12	2	20	368	193	193	193.644	No
1732	TCF Lef FGF and LDN 1 drift corrected cropped.tif	12	3	21	368	193	193	192.751	No
1733	TCF Lef FGF and LDN 1 drift corrected cropped.tif	12	4	19	367	193	193	194.093	No
1734	TCF Lef FGF and LDN 1 drift corrected cropped.tif	12	5	19	367	193	193	194.093	No
1735	TCF Lef FGF and LDN 1 drift corrected cropped.tif	12	6	20	367	193	193	193.197	No
1736	TCF Lef FGF and LDN 1 drift corrected cropped.tif	12	7	19	367	193	193	194.093	No
1737	TCF Lef FGF and LDN 1 drift corrected cropped.tif	12	8	19	370	193	193	195.44	No
1738	TCF Lef FGF and LDN 1 drift corrected cropped.tif	12	9	19	370	193	193	195.44	No
1739	TCF Lef FGF and LDN 1 drift corrected cropped.tif	12	10	19	371	193	193	195.898	No
1740	TCF Lef FGF and LDN 1 drift corrected cropped.tif	12	11	19	373	193	193	196.825	No
1741	TCF Lef FGF and LDN 1 drift corrected cropped.tif	12	12	19	373	193	193	196.825	No
1742	TCF Lef FGF and LDN 1 drift corrected cropped.tif	12	13	16	373	193	193	199.482	No
1743	TCF Lef FGF and LDN 1 drift corrected cropped.tif	12	14	19	370	193	193	195.44	No
1744	TCF Lef FGF and LDN 1 drift corrected cropped.tif	12	15	17	373	193	193	198.595	No
1745	TCF Lef FGF and LDN 1 drift corrected cropped.tif	12	16	14	375	193	193	202.181	No
1746	TCF Lef FGF and LDN 1 drift corrected cropped.tif	12	17	12	376	193	193	204.416	No
1747	TCF Lef FGF and LDN 1 drift corrected cropped.tif	12	18	14	377	193	193	203.118	No
1748	TCF Lef FGF and LDN 1 drift corrected cropped.tif	12	19	16	378	193	193	201.837	No
1749	TCF Lef FGF and LDN 1 drift corrected cropped.tif	12	20	15	380	193	193	203.679	No
1750	TCF Lef FGF and LDN 1 drift corrected cropped.tif	12	21	16	381	193	193	203.295	No
1751	TCF Lef FGF and LDN 1 drift corrected cropped.tif	12	22	16	381	193	193	203.295	No
1752	TCF Lef FGF and LDN 1 drift corrected cropped.tif	12	23	16	380	193	193	202.805	No
1753	TCF Lef FGF and LDN 1 drift corrected cropped.tif	12	24	13	378	193	193	204.472	No
1754	TCF Lef FGF and LDN 1 drift corrected cropped.tif	12	25	16	381	193	193	203.295	No
1755	TCF Lef FGF and LDN 1 drift corrected cropped.tif	12	26	16	381	193	193	203.295	No
1756	TCF Lef FGF and LDN 1 drift corrected cropped.tif	12	27	16	380	193	193	202.805	No
1757	TCF Lef FGF and LDN 1 drift corrected cropped.tif	12	28	18	380	193	193	201.062	No
1758	TCF Lef FGF and LDN 1 drift corrected cropped.tif	12	29	17	380	193	193	201.933	No
1759	TCF Lef FGF and LDN 1 drift corrected cropped.tif	12	30	17	380	193	193	201.933	No
1760	TCF Lef FGF and LDN 1 drift corrected cropped.tif	12	31	16	381	193	193	203.295	No
1761	TCF Lef FGF and LDN 1 drift corrected cropped.tif	12	32	14	381	193	193	205.039	No
1762	TCF Lef FGF and LDN 1 drift corrected cropped.tif	12	33	14	381	193	193	205.039	No
1763	TCF Lef FGF and LDN 1 drift corrected cropped.tif	12	34	14	381	193	193	205.039	No
1764	TCF Lef FGF and LDN 1 drift corrected cropped.tif	12	35	12	381	193	193	206.787	No
1765	TCF Lef FGF and LDN 1 drift corrected cropped.tif	12	36	14	381	193	193	205.039	No
1766	TCF Lef FGF and LDN 1 drift corrected cropped.tif	12	37	14	381	193	193	205.039	No
1767	TCF Lef FGF and LDN 1 drift corrected cropped.tif	12	38	12	382	193	193	207.273	No
1768	TCF Lef FGF and LDN 1 drift corrected cropped.tif	12	39	14	381	193	193	205.039	No
1769	TCF Lef FGF and LDN 1 drift corrected cropped.tif	12	40	14	381	193	193	205.039	No
1770	TCF Lef FGF and LDN 1 drift corrected cropped.tif	12	41	14	381	193	193	205.039	No
1771	TCF Lef FGF and LDN 1 drift corrected cropped.tif	12	42	14	381	193	193	205.039	No
1772	TCF Lef FGF and LDN 1 drift corrected cropped.tif	12	43	14	381	193	193	205.039	No
1773	TCF Lef FGF and LDN 1 drift corrected cropped.tif	12	44	14	381	193	193	205.039	No
1774	TCF Lef FGF and LDN 1 drift corrected cropped.tif	12	45	14	384	193	193	206.519	No
1775	TCF Lef FGF and LDN 1 drift corrected cropped.tif	12	46	14	384	193	193	206.519	No
1776	TCF Lef FGF and LDN 1 drift corrected cropped.tif	12	47	14	384	193	193	206.519	No
1777	TCF Lef FGF and LDN 1 drift corrected cropped.tif	12	48	11	382	193	193	208.147	No
1778	TCF Lef FGF and LDN 1 drift corrected cropped.tif	12	49	11	382	193	193	208.147	No
1779	TCF Lef FGF and LDN 1 drift corrected cropped.tif	12	50	19	384	193	193	202.2	No
1780	TCF Lef FGF and LDN 1 drift corrected cropped.tif	12	51	19	384	193	193	202.2	No
1781	TCF Lef FGF and LDN 1 drift corrected cropped.tif	12	52	18	379	193	193	200.572	No
1782	TCF Lef FGF and LDN 1 drift corrected cropped.tif	12	53	19	381	193	193	200.689	No
1783	TCF Lef FGF and LDN 1 drift corrected cropped.tif	12	54	19	381	193	193	200.689	No
1784	TCF Lef FGF and LDN 1 drift corrected cropped.tif	12	55	19	383	193	193	201.693	No
1785	TCF Lef FGF and LDN 1 drift corrected cropped.tif	12	56	19	383	193	193	201.693	No
1786	TCF Lef FGF and LDN 1 drift corrected cropped.tif	12	57	22	384	193	193	199.625	No
1787	TCF Lef FGF and LDN 1 drift corrected cropped.tif	12	58	22	384	193	193	199.625	No
1788	TCF Lef FGF and LDN 1 drift corrected cropped.tif	12	59	22	384	193	193	199.625	No
1789	TCF Lef FGF and LDN 1 drift corrected cropped.tif	12	60	22	384	193	193	199.625	No
1790	TCF Lef FGF and LDN 1 drift corrected cropped.tif	12	61	18	384	193	193	203.062	No
1791	TCF Lef FGF and LDN 1 drift corrected cropped.tif	12	62	20	384	193	193	201.34	No
1792	TCF Lef FGF and LDN 1 drift corrected cropped.tif	12	63	21	381	193	193	198.957	No
1793	TCF Lef FGF and LDN 1 drift corrected cropped.tif	12	64	21	381	193	193	198.957	No
1794	TCF Lef FGF and LDN 1 drift corrected cropped.tif	12	65	20	381	193	193	199.822	No
1795	TCF Lef FGF and LDN 1 drift corrected cropped.tif	12	66	20	381	193	193	199.822	No
1796	TCF Lef FGF and LDN 1 drift corrected cropped.tif	12	67	20	380	193	193	199.324	No
1797	TCF Lef FGF and LDN 1 drift corrected cropped.tif	12	68	22	380	193	193	197.59	No
1798	TCF Lef FGF and LDN 1 drift corrected cropped.tif	12	69	24	380	193	193	195.862	No
1799	TCF Lef FGF and LDN 1 drift corrected cropped.tif	12	70	24	381	193	193	196.369	No
1800	TCF Lef FGF and LDN 1 drift corrected cropped.tif	12	71	24	381	193	193	196.369	No
1801	TCF Lef FGF and LDN 1 drift corrected cropped.tif	12	72	23	381	193	193	197.231	No
1802	TCF Lef FGF and LDN 1 drift corrected cropped.tif	12	73	21	381	193	193	198.957	No
1803	TCF Lef FGF and LDN 1 drift corrected cropped.tif	12	74	21	379	193	193	197.96	No
1804	TCF Lef FGF and LDN 1 drift corrected cropped.tif	12	75	21	378	193	193	197.466	No
1805	TCF Lef FGF and LDN 1 drift corrected cropped.tif	12	76	22	379	193	193	197.091	No
1806	TCF Lef FGF and LDN 1 drift corrected cropped.tif	12	77	20	379	193	193	198.829	No
1807	TCF Lef FGF and LDN 1 drift corrected cropped.tif	12	78	22	380	193	193	197.59	No
1808	TCF Lef FGF and LDN 1 drift corrected cropped.tif	12	79	21	379	193	193	197.96	No
1809	TCF Lef FGF and LDN 1 drift corrected cropped.tif	12	80	21	379	193	193	197.96	No
1810	TCF Lef FGF and LDN 1 drift corrected cropped.tif	12	81	21	378	193	193	197.466	No
1811	TCF Lef FGF and LDN 1 drift corrected cropped.tif	12	82	22	377	193	193	196.105	No
1812	TCF Lef FGF and LDN 1 drift corrected cropped.tif	12	83	19	378	193	193	199.211	No
1813	TCF Lef FGF and LDN 1 drift corrected cropped.tif	12	84	19	378	193	193	199.211	No
1814	TCF Lef FGF and LDN 1 drift corrected cropped.tif	12	85	18	376	193	193	199.123	No
1815	TCF Lef FGF and LDN 1 drift corrected cropped.tif	12	86	19	375	193	193	197.768	No
1816	TCF Lef FGF and LDN 1 drift corrected cropped.tif	12	87	20	376	193	193	197.368	No
1817	TCF Lef FGF and LDN 1 drift corrected cropped.tif	12	88	22	377	193	193	196.105	No
1818	TCF Lef FGF and LDN 1 drift corrected cropped.tif	12	89	21	378	193	193	197.466	No
1819	TCF Lef FGF and LDN 1 drift corrected cropped.tif	12	90	21	380	193	193	198.457	No
1820	TCF Lef FGF and LDN 1 drift corrected cropped.tif	12	91	17	378	193	193	200.96	No
1821	TCF Lef FGF and LDN 1 drift corrected cropped.tif	12	92	18	378	193	193	200.085	No
1822	TCF Lef FGF and LDN 1 drift corrected cropped.tif	12	93	18	378	193	193	200.085	No
1823	TCF Lef FGF and LDN 1 drift corrected cropped.tif	12	94	19	378	193	193	199.211	No
1824	TCF Lef FGF and LDN 1 drift corrected cropped.tif	12	95	16	378	193	193	201.837	No
1825	TCF Lef FGF and LDN 1 drift corrected cropped.tif	12	96	13	377	193	193	204	No
1826	TCF Lef FGF and LDN 1 drift corrected cropped.tif	12	97	11	376	193	193	205.302	No
1827	TCF Lef FGF and LDN 1 drift corrected cropped.tif	12	98	11	376	193	193	205.302	No
1828	TCF Lef FGF and LDN 1 drift corrected cropped.tif	12	99	11	376	193	193	205.302	No
1829	TCF Lef FGF and LDN 1 drift corrected cropped.tif	12	100	11	376	193	193	205.302	No
1830	TCF Lef FGF and LDN 1 drift corrected cropped.tif	12	101	10	373	193	193	204.824	No
1831	TCF Lef FGF and LDN 1 drift corrected cropped.tif	12	102	10	375	193	193	205.73	No
1832	TCF Lef FGF and LDN 1 drift corrected cropped.tif	12	103	6	376	193	193	209.748	No
1833	TCF Lef FGF and LDN 1 drift corrected cropped.tif	12	104	5	374	193	193	209.745	No
1834	TCF Lef FGF and LDN 1 drift corrected cropped.tif	12	105	6	374	193	193	208.849	No
1835	TCF Lef FGF and LDN 1 drift corrected cropped.tif	12	106	7	374	193	193	207.954	No
1836	TCF Lef FGF and LDN 1 drift corrected cropped.tif	12	107	7	374	193	193	207.954	No
1837	TCF Lef FGF and LDN 1 drift corrected cropped.tif	12	108	7	374	193	193	207.954	No
1838	TCF Lef FGF and LDN 1 drift corrected cropped.tif	12	109	9	374	193	193	206.167	No
1839	TCF Lef FGF and LDN 1 drift corrected cropped.tif	12	110	8	375	193	193	207.511	No
1840	TCF Lef FGF and LDN 1 drift corrected cropped.tif	12	111	8	374	193	193	207.06	No
1841	TCF Lef FGF and LDN 1 drift corrected cropped.tif	12	112	8	375	193	193	207.511	No
1842	TCF Lef FGF and LDN 1 drift corrected cropped.tif	12	113	9	376	193	193	207.077	No
1843	TCF Lef FGF and LDN 1 drift corrected cropped.tif	12	114	8	376	193	193	207.966	No
1844	TCF Lef FGF and LDN 1 drift corrected cropped.tif	12	115	8	376	193	193	207.966	No
1845	TCF Lef FGF and LDN 1 drift corrected cropped.tif	12	116	5	376	193	193	210.639	No
1846	TCF Lef FGF and LDN 1 drift corrected cropped.tif	12	117	7	373	193	193	207.509	No
1847	TCF Lef FGF and LDN 1 drift corrected cropped.tif	12	118	5	373	193	193	209.304	No
1848	TCF Lef FGF and LDN 1 drift corrected cropped.tif	12	119	3	373	193	193	211.102	No
1849	TCF Lef FGF and LDN 1 drift corrected cropped.tif	12	120	3	371	193	193	210.238	No
1850	TCF Lef FGF and LDN 1 drift corrected cropped.tif	12	121	3	371	193	193	210.238	No
1851	TCF Lef FGF and LDN 1 drift corrected cropped.tif	12	122	3	370	193	193	209.812	No
1852	TCF Lef FGF and LDN 1 drift corrected cropped.tif	12	123	4	370	193	193	208.907	No
1853	TCF Lef FGF and LDN 1 drift corrected cropped.tif	12	124	5	367	193	193	206.737	No
1854	TCF Lef FGF and LDN 1 drift corrected cropped.tif	12	125	5	366	193	193	206.323	No
1855	TCF Lef FGF and LDN 1 drift corrected cropped.tif	12	126	4	365	193	193	206.826	No
1856	TCF Lef FGF and LDN 1 drift corrected cropped.tif	12	127	3	362	193	193	206.545	No
1857	TCF Lef FGF and LDN 1 drift corrected cropped.tif	12	128	3	362	193	193	206.545	No
1858	TCF Lef FGF and LDN 1 drift corrected cropped.tif	12	129	2	360	193	193	206.693	No
1859	TCF Lef FGF and LDN 1 drift corrected cropped.tif	12	130	2	360	193	193	206.693	No
1860	TCF Lef FGF and LDN 1 drift corrected cropped.tif	12	131	2	357	193	193	205.565	No
1861	TCF Lef FGF and LDN 1 drift corrected cropped.tif	12	132	3	356	193	193	204.267	No
1862	TCF Lef FGF and LDN 1 drift corrected cropped.tif	12	133	2	357	193	193	205.565	No
1863	TCF Lef FGF and LDN 1 drift corrected cropped.tif	12	134	2	356	193	193	205.197	No
1864	TCF Lef FGF and LDN 1 drift corrected cropped.tif	12	135	2	356	193	193	205.197	No
1865	TCF Lef FGF and LDN 1 drift corrected cropped.tif	12	136	2	356	193	193	205.197	No
1866	TCF Lef FGF and LDN 1 drift corrected cropped.tif	12	137	2	356	193	193	205.197	No
1867	TCF Lef FGF and LDN 1 drift corrected cropped.tif	12	138	2	354	193	193	204.475	No
1868	TCF Lef FGF and LDN 1 drift corrected cropped.tif	12	139	2	355	193	193	204.834	No
1869	TCF Lef FGF and LDN 1 drift corrected cropped.tif	12	140	2	355	193	193	204.834	No
1870	TCF Lef FGF and LDN 1 drift corrected cropped.tif	12	141	3	355	193	193	203.902	No
1871	TCF Lef FGF and LDN 1 drift corrected cropped.tif	12	142	3	355	193	193	203.902	No
1872	TCF Lef FGF and LDN 1 drift corrected cropped.tif	12	143	5	354	193	193	201.675	No
1873	TCF Lef FGF and LDN 1 drift corrected cropped.tif	12	144	5	353	193	193	201.316	No
1874	TCF Lef FGF and LDN 1 drift corrected cropped.tif	12	145	5	353	193	193	201.316	No
1875	TCF Lef FGF and LDN 1 drift corrected cropped.tif	12	146	8	355	193	193	199.251	No
1876	TCF Lef FGF and LDN 1 drift corrected cropped.tif	12	147	8	355	193	193	199.251	No
1877	TCF Lef FGF and LDN 1 drift corrected cropped.tif	12	148	10	357	193	193	198.154	No
1878	TCF Lef FGF and LDN 1 drift corrected cropped.tif	12	149	11	357	193	193	197.231	No
1879	TCF Lef FGF and LDN 1 drift corrected cropped.tif	12	150	11	359	193	193	198.01	No
1880	TCF Lef FGF and LDN 1 drift corrected cropped.tif	12	151	21	362	193	193	190.118	No
1881	TCF Lef FGF and LDN 1 drift corrected cropped.tif	12	152	21	362	193	193	190.118	No
1882	TCF Lef FGF and LDN 1 drift corrected cropped.tif	12	153	19	364	193	193	192.782	No
1883	TCF Lef FGF and LDN 1 drift corrected cropped.tif	12	154	19	363	193	193	192.354	No
1884	TCF Lef FGF and LDN 1 drift corrected cropped.tif	12	155	20	361	193	193	190.602	No
1885	TCF Lef FGF and LDN 1 drift corrected cropped.tif	12	156	20	361	193	193	190.602	No
1886	TCF Lef FGF and LDN 1 drift corrected cropped.tif	12	157	21	359	193	193	188.86	No
1887	TCF Lef FGF and LDN 1 drift corrected cropped.tif	12	158	21	361	193	193	189.695	No
1888	TCF Lef FGF and LDN 1 drift corrected cropped.tif	12	159	21	362	193	193	190.118	No
1889	TCF Lef FGF and LDN 1 drift corrected cropped.tif	12	160	21	359	193	193	188.86	No
1890	TCF Lef FGF and LDN 1 drift corrected cropped.tif	12	161	20	359	193	193	189.771	No
1891	TCF Lef FGF and LDN 1 drift corrected cropped.tif	12	162	20	359	193	193	189.771	No
1892	TCF Lef FGF and LDN 1 drift corrected cropped.tif	12	163	20	359	193	193	189.771	No
1893	TCF Lef FGF and LDN 1 drift corrected cropped.tif	12	164	19	363	193	193	192.354	No
1894	TCF Lef FGF and LDN 1 drift corrected cropped.tif	12	165	19	361	193	193	191.51	No
1895	TCF Lef FGF and LDN 1 drift corrected cropped.tif	12	166	19	361	193	193	191.51	No
1896	TCF Lef FGF and LDN 1 drift corrected cropped.tif	12	167	19	360	193	193	191.094	No
1897	TCF Lef FGF and LDN 1 drift corrected cropped.tif	12	168	20	358	193	193	189.362	No
1898	TCF Lef FGF and LDN 1 drift corrected cropped.tif	12	169	20	358	193	193	189.362	No
1899	TCF Lef FGF and LDN 1 drift corrected cropped.tif	12	170	20	360	193	193	190.184	No
1900	TCF Lef FGF and LDN 1 drift corrected cropped.tif	12	171	20	358	193	193	189.362	No
1901	TCF Lef FGF and LDN 1 drift corrected cropped.tif	12	172	20	358	193	193	189.362	No
1902	TCF Lef FGF and LDN 1 drift corrected cropped.tif	12	173	21	359	193	193	188.86	No
1903	TCF Lef FGF and LDN 1 drift corrected cropped.tif	12	174	21	360	193	193	189.275	No
1904	TCF Lef FGF and LDN 1 drift corrected cropped.tif	12	175	21	360	193	193	189.275	No
1905	TCF Lef FGF and LDN 1 drift corrected cropped.tif	12	176	22	360	193	193	188.367	No
1906	TCF Lef FGF and LDN 1 drift corrected cropped.tif	12	177	23	361	193	193	187.883	No
1907	TCF Lef FGF and LDN 1 drift corrected cropped.tif	12	178	23	361	193	193	187.883	No
1908	TCF Lef FGF and LDN 1 drift corrected cropped.tif	12	179	23	361	193	193	187.883	No
1909	TCF Lef FGF and LDN 1 drift corrected cropped.tif	12	180	23	361	193	193	187.883	No
1910	TCF Lef FGF and LDN 1 drift corrected cropped.tif	12	181	24	359	193	193	186.132	No
1911	TCF Lef FGF and LDN 1 drift corrected cropped.tif	12	182	25	359	193	193	185.224	No
1912	TCF Lef FGF and LDN 1 drift corrected cropped.tif	12	183	27	359	193	193	183.412	No
1913	TCF Lef FGF and LDN 1 drift corrected cropped.tif	12	184	27	359	193	193	183.412	No
1914	TCF Lef FGF and LDN 1 drift corrected cropped.tif	12	185	29	359	193	193	181.604	No
1915	TCF Lef FGF and LDN 1 drift corrected cropped.tif	12	186	29	359	193	193	181.604	No
1916	TCF Lef FGF and LDN 1 drift corrected cropped.tif	12	187	27	359	193	193	183.412	No
1917	TCF Lef FGF and LDN 1 drift corrected cropped.tif	12	188	27	362	193	193	184.708	No
1918	TCF Lef FGF and LDN 1 drift corrected cropped.tif	12	189	28	361	193	193	183.371	No
1919	TCF Lef FGF and LDN 1 drift corrected cropped.tif	12	190	31	363	193	193	181.571	No
1920	TCF Lef FGF and LDN 1 drift corrected cropped.tif	12	191	32	364	193	193	181.135	No
1921	TCF Lef FGF and LDN 1 drift corrected cropped.tif	12	192	30	365	193	193	183.371	No
1922	TCF Lef FGF and LDN 1 drift corrected cropped.tif	12	193	29	366	193	193	184.719	No
1923	TCF Lef FGF and LDN 1 drift corrected cropped.tif	12	194	28	368	193	193	186.531	No
1924	TCF Lef FGF and LDN 1 drift corrected cropped.tif	12	195	27	367	193	193	186.954	No
1925	TCF Lef FGF and LDN 1 drift corrected cropped.tif	12	196	30	367	193	193	184.296	No
1926	TCF Lef FGF and LDN 1 drift corrected cropped.tif	12	197	31	367	193	193	183.412	No
1927	TCF Lef FGF and LDN 1 drift corrected cropped.tif	12	198	29	367	193	193	185.181	No
1928	TCF Lef FGF and LDN 1 drift corrected cropped.tif	12	199	28	367	193	193	186.067	No
1929	TCF Lef FGF and LDN 1 drift corrected cropped.tif	12	200	28	368	193	193	186.531	No
1930	TCF Lef FGF and LDN 1 drift corrected cropped.tif	12	201	28	368	193	193	186.531	No
1931	TCF Lef FGF and LDN 1 drift corrected cropped.tif	12	202	28	368	193	193	186.531	No
1932	TCF Lef FGF and LDN 1 drift corrected cropped.tif	12	203	29	368	193	193	185.648	No
1933	TCF Lef FGF and LDN 1 drift corrected cropped.tif	12	204	31	368	193	193	183.883	No
1934	TCF Lef FGF and LDN 1 drift corrected cropped.tif	12	205	31	368	193	193	183.883	No
1935	TCF Lef FGF and LDN 1 drift corrected cropped.tif	12	206	31	368	193	193	183.883	No
1936	TCF Lef FGF and LDN 1 drift corrected cropped.tif	12	207	32	367	193	193	182.529	No
1937	TCF Lef FGF and LDN 1 drift corrected cropped.tif	12	208	32	367	193	193	182.529	No
1938	TCF Lef FGF and LDN 1 drift corrected cropped.tif	12	209	33	367	193	193	181.648	No
1939	TCF Lef FGF and LDN 1 drift corrected cropped.tif	12	210	33	367	193	193	181.648	No
1940	TCF Lef FGF and LDN 1 drift corrected cropped.tif	12	211	33	368	193	193	182.124	No
1941	TCF Lef FGF and LDN 1 drift corrected cropped.tif	12	212	33	368	193	193	182.124	No
1942	TCF Lef FGF and LDN 1 drift corrected cropped.tif	12	213	37	370	193	193	179.602	No
1943	TCF Lef FGF and LDN 1 drift corrected cropped.tif	12	214	39	370	193	193	177.868	No
1944	TCF Lef FGF and LDN 1 drift corrected cropped.tif	12	215	38	370	193	193	178.734	No
1945	TCF Lef FGF and LDN 1 drift corrected cropped.tif	12	216	37	368	193	193	178.62	No
1946	TCF Lef FGF and LDN 1 drift corrected cropped.tif	12	217	36	367	193	193	179.011	No
1947	TCF Lef FGF and LDN 1 drift corrected cropped.tif	12	218	36	367	193	193	179.011	No
1948	TCF Lef FGF and LDN 1 drift corrected cropped.tif	12	219	36	364	193	193	177.589	No
1949	TCF Lef FGF and LDN 1 drift corrected cropped.tif	12	220	26	356	193	193	183.068	No
1950	TCF Lef FGF and LDN 1 drift corrected cropped.tif	12	221	20	356	193	193	188.558	No
1951	TCF Lef FGF and LDN 1 drift corrected cropped.tif	12	222	19	354	193	193	188.693	No
1952	TCF Lef FGF and LDN 1 drift corrected cropped.tif	12	223	21	355	193	193	187.243	No
1953	TCF Lef FGF and LDN 1 drift corrected cropped.tif	12	224	23	357	193	193	186.215	No
1954	TCF Lef FGF and LDN 1 drift corrected cropped.tif	12	225	24	361	193	193	186.979	No
1955	TCF Lef FGF and LDN 1 drift corrected cropped.tif	12	226	24	361	193	193	186.979	No
1956	TCF Lef FGF and LDN 1 drift corrected cropped.tif	12	227	28	361	193	193	183.371	No
1957	TCF Lef FGF and LDN 1 drift corrected cropped.tif	12	228	28	361	193	193	183.371	No
1958	TCF Lef FGF and LDN 1 drift corrected cropped.tif	12	229	29	361	193	193	182.472	No
1959	TCF Lef FGF and LDN 1 drift corrected cropped.tif	12	230	29	361	193	193	182.472	No
1960	TCF Lef FGF and LDN 1 drift corrected cropped.tif	12	231	29	361	193	193	182.472	No
1961	TCF Lef FGF and LDN 1 drift corrected cropped.tif	12	232	29	361	193	193	182.472	No
1962	TCF Lef FGF and LDN 1 drift corrected cropped.tif	12	233	31	361	193	193	180.677	No
1963	TCF Lef FGF and LDN 1 drift corrected cropped.tif	12	234	31	361	193	193	180.677	No
1964	TCF Lef FGF and LDN 1 drift corrected cropped.tif	12	235	33	361	193	193	178.885	No
1965	TCF Lef FGF and LDN 1 drift corrected cropped.tif	12	236	33	361	193	193	178.885	No
1966	TCF Lef FGF and LDN 1 drift corrected cropped.tif	13	1	59	19	139	139	123.434	No
1967	TCF Lef FGF and LDN 1 drift corrected cropped.tif	13	2	59	19	139	139	123.434	No
1968	TCF Lef FGF and LDN 1 drift corrected cropped.tif	13	3	59	19	139	139	123.434	No
1969	TCF Lef FGF and LDN 1 drift corrected cropped.tif	13	4	59	19	139	139	123.434	No
1970	TCF Lef FGF and LDN 1 drift corrected cropped.tif	13	5	58	19	139	139	124.085	No
1971	TCF Lef FGF and LDN 1 drift corrected cropped.tif	13	6	61	19	139	139	122.147	No
1972	TCF Lef FGF and LDN 1 drift corrected cropped.tif	13	7	61	19	139	139	122.147	No
1973	TCF Lef FGF and LDN 1 drift corrected cropped.tif	13	8	61	19	139	139	122.147	No
1974	TCF Lef FGF and LDN 1 drift corrected cropped.tif	13	9	61	20	139	139	121.38	No
1975	TCF Lef FGF and LDN 1 drift corrected cropped.tif	13	10	62	20	139	139	120.739	No
1976	TCF Lef FGF and LDN 1 drift corrected cropped.tif	13	11	65	19	139	139	119.633	No
1977	TCF Lef FGF and LDN 1 drift corrected cropped.tif	13	12	65	19	139	139	119.633	No
1978	TCF Lef FGF and LDN 1 drift corrected cropped.tif	13	13	64	17	139	139	121.824	No
1979	TCF Lef FGF and LDN 1 drift corrected cropped.tif	13	14	62	17	139	139	123.065	No
1980	TCF Lef FGF and LDN 1 drift corrected cropped.tif	13	15	63	17	139	139	122.442	No
1981	TCF Lef FGF and LDN 1 drift corrected cropped.tif	13	16	64	17	139	139	121.824	No
1982	TCF Lef FGF and LDN 1 drift corrected cropped.tif	13	17	64	15	139	139	123.406	No
1983	TCF Lef FGF and LDN 1 drift corrected cropped.tif	13	18	59	14	139	139	127.283	No
1984	TCF Lef FGF and LDN 1 drift corrected cropped.tif	13	19	62	14	139	139	125.419	No
1985	TCF Lef FGF and LDN 1 drift corrected cropped.tif	13	20	61	14	139	139	126.036	No
1986	TCF Lef FGF and LDN 1 drift corrected cropped.tif	13	21	61	14	139	139	126.036	No
1987	TCF Lef FGF and LDN 1 drift corrected cropped.tif	13	22	61	13	139	139	126.823	No
1988	TCF Lef FGF and LDN 1 drift corrected cropped.tif	13	23	59	15	139	139	126.507	No
1989	TCF Lef FGF and LDN 1 drift corrected cropped.tif	13	24	59	16	139	139	125.734	No
1990	TCF Lef FGF and LDN 1 drift corrected cropped.tif	13	25	61	16	139	139	124.471	No
1991	TCF Lef FGF and LDN 1 drift corrected cropped.tif	13	26	60	17	139	139	124.326	No
1992	TCF Lef FGF and LDN 1 drift corrected cropped.tif	13	27	60	17	139	139	124.326	No
1993	TCF Lef FGF and LDN 1 drift corrected cropped.tif	13	28	60	16	139	139	125.1	No
1994	TCF Lef FGF and LDN 1 drift corrected cropped.tif	13	29	62	19	139	139	121.511	No
1995	TCF Lef FGF and LDN 1 drift corrected cropped.tif	13	30	61	16	139	139	124.471	No
1996	TCF Lef FGF and LDN 1 drift corrected cropped.tif	13	31	61	16	139	139	124.471	No
1997	TCF Lef FGF and LDN 1 drift corrected cropped.tif	13	32	62	18	139	139	122.287	No
1998	TCF Lef FGF and LDN 1 drift corrected cropped.tif	13	33	62	19	139	139	121.511	No
1999	TCF Lef FGF and LDN 1 drift corrected cropped.tif	13	34	63	18	139	139	121.659	No
[truncated: 30,588 more rows]

## Sheet: Fig 2C,2D,5C,5D processed data
Control	Time from Entry (hrs)	Number	Mean Angle	SE	Mean Euc. Dis (um)	SE	Mean Euc. Speed (um/min)	SE	Mean Acc. Dis (um)	SE	Mean Acc. Speed (um/min)	SE	Mean Persistence	SE
Intercondensate	0	263	82.0989	3.2941	6.9929	0.4078	0.01942	0.001133	27.1505	0.973	0.07542	0.002703	0.2643	0.01136
	-6	245	89.1991	3.4778	7.1893	0.4528	0.01997	0.001258	24.9952	0.8288	0.06943	0.002302	0.3004	0.01315
	-12	197	91.9656	3.8235	7.1799	0.5258	0.01994	0.00146	25.6118	0.9856	0.07114	0.002738	0.2985	0.01539
Condensate	0	20	36.1523	4.5575	17.4862	2.6597	0.04857	0.007388	37.5601	2.7181	0.1043	0.00755	0.4438	0.047
	-6	14	56.8871	12.1091	15.207	3.5607	0.04224	0.009891	36.7759	4.0622	0.1022	0.01128	0.3708	0.05613
	-12	9	73.5701	15.1707	11.7104	3.8087	0.03253	0.01058	32.3375	4.3215	0.08983	0.012	0.3218	0.07464
FGGHiBMPLo	Time from Entry (hrs)	Number	Mean Angle	SE	Mean Euc. Dis (um)	SE	Mean Euc. Speed (um/min)	SE	Mean Acc. Dis (um)	SE	Mean Acc. Speed (um/min)	SE	Mean Persistence	SE
Intercondensate	0	108	74.7653	5.0391	9.1319	0.5921	0.02537	0.001645	33.7805	1.1479	0.09383	0.003189	0.2619	0.01377
	-6	104	66.0474	4.8157	8.8304	0.6857	0.02453	0.001905	34.0482	1.032	0.09458	0.002867	0.2561	0.0159
	-12	91	71.1652	5.4164	9.7759	0.8424	0.02716	0.00234	35.1432	1.26	0.09762	0.0035	0.2697	0.01657
Condensate	0	25	32.0542	5.1252	15.727	1.5265	0.04369	0.00424	39.9525	2.6584	0.111	0.007384	0.3931	0.03039
	-6	21	45.7544	7.8948	10.9858	1.443	0.03052	0.004008	34.9017	2.1725	0.09695	0.006035	0.3046	0.02829
	-12	17	69.9107	12.6668	8.6882	1.6797	0.02413	0.004666	35.2256	2.6242	0.09785	0.007289	0.2425	0.03878

## Sheet: Fig 5 E All per track data 
	Group	Track#	Length_mins	Acc_Dist_um	Euc_Dist_um	Persistence	Acc_Velocity_um_min	Euc_Velocity_um_min	Class	Start_Dist_COM_um	Group2
0	Control	1003	280	34.4419	6.2209	0.1806	0.123	0.02222	No-No	102.819	Control_ No-No
1	Control	1004	1500	204.654	17.4422	0.08523	0.1364	0.01163	No-No	63.2291	Control_ No-No
2	Control	1007	1500	195.226	17.0309	0.08724	0.1302	0.01135	No-No	82.0702	Control_ No-No
3	Control	1008	1500	139.424	17.8547	0.1281	0.09295	0.0119	No-No	48.0069	Control_ No-No
4	Control	1009	1500	149.071	6.5801	0.04414	0.09938	0.004387	No-No	64.6418	Control_ No-No
5	Control	1010	1510	193.024	20.2386	0.1049	0.1278	0.0134	No-No	86.52	Control_ No-No
6	Control	1011	700	85.9177	23.7247	0.2761	0.1227	0.03389	No-Yes	54.024	Control_ No-Yes
7	Control	1012	610	43.6119	14.5036	0.3326	0.07149	0.02378	No-No	73.33	Control_ No-No
8	Control	1013	150	17.8708	1.9574	0.1095	0.1191	0.01305	No-No	90.5307	Control_ No-No
9	Control	1014	1520	149.498	30.3499	0.203	0.09835	0.01997	No-No	85.4323	Control_ No-No
10	Control	1016	1500	142.869	30.5763	0.214	0.09525	0.02038	No-No	87.7932	Control_ No-No
11	Control	1018	110	13.5419	3.6094	0.2665	0.1231	0.03281	No-No	100.55	Control_ No-No
12	Control	1020	1500	170.43	26.0348	0.1528	0.1136	0.01736	No-No	74.3623	Control_ No-No
13	Control	1021	690	88.628	21.1278	0.2384	0.1284	0.03062	No-No	81.8385	Control_ No-No
14	Control	1022	1500	109.32	6.9206	0.06331	0.07288	0.004614	No-No	44.6188	Control_ No-No
15	Control	1025	1510	160.464	3.9635	0.0247	0.1063	0.002625	No-No	77.0148	Control_ No-No
16	Control	1026	1500	182.59	37.2687	0.2041	0.1217	0.02485	No-No	73.7033	Control_ No-No
17	Control	1027	1510	155.189	10.3763	0.06686	0.1028	0.006872	No-No	77.1367	Control_ No-No
18	Control	1028	1500	185.539	30.8384	0.1662	0.1237	0.02056	No-No	65.8128	Control_ No-No
19	Control	1029	1500	294.821	15.0609	0.05108	0.1965	0.01004	No-No	51.0984	Control_ No-No
20	Control	1030	1500	150.002	10.8281	0.07219	0.1	0.007219	No-No	80.191	Control_ No-No
21	Control	1031	1500	170.519	25.6269	0.1503	0.1137	0.01708	No-No	89.142	Control_ No-No
22	Control	1032	1500	165.187	7.6566	0.04635	0.1101	0.005104	No-No	51.7367	Control_ No-No
23	Control	1034	180	14.9988	0.8754	0.05836	0.08333	0.004863	No-Yes	31.2067	Control_ No-Yes
24	Control	1035	1510	223.249	32.0269	0.1435	0.1478	0.02121	No-No	67.7772	Control_ No-No
25	Control	1038	1500	81.8068	13.6742	0.1672	0.05454	0.009116	No-No	60.5432	Control_ No-No
26	Control	1040	1500	139.676	19.8466	0.1421	0.09312	0.01323	No-No	52.7576	Control_ No-No
27	Control	1041	210	20.0358	6.5801	0.3284	0.09541	0.03133	No-No	94.5761	Control_ No-No
28	Control	1042	1520	97.9569	9.6095	0.0981	0.06445	0.006322	No-No	66.4423	Control_ No-No
29	Control	1044	1500	142.428	54.2641	0.381	0.09495	0.03618	No-No	86.0461	Control_ No-No
30	Control	1045	1500	94.007	24.7677	0.2635	0.06267	0.01651	No-No	82.454	Control_ No-No
31	Control	1046	720	73.7838	10.9687	0.1487	0.1025	0.01523	No-No	90.8459	Control_ No-No
32	Control	1047	590	37.8852	15.0736	0.3979	0.06421	0.02555	No-Yes	42.827	Control_ No-Yes
33	Control	1048	140	12.4223	1.3841	0.1114	0.08873	0.009887	No-No	102.589	Control_ No-No
34	Control	1049	1500	132.578	29.7764	0.2246	0.08839	0.01985	No-No	85.8729	Control_ No-No
35	Control	1050	1500	90.264	11.8906	0.1317	0.06018	0.007927	No-No	80.9433	Control_ No-No
36	Control	2001	160	16.2721	1.3841	0.08506	0.1017	0.008651	No-No	67.6922	Control_ No-No
37	Control	2002	1500	77.5922	11.7447	0.1514	0.05173	0.00783	No-No	48.4739	Control_ No-No
38	Control	2003	100	3.7902	2.5522	0.6734	0.0379	0.02552	No-No	81.1517	Control_ No-No
39	Control	2004	1500	95.7002	4.9905	0.05215	0.0638	0.003327	No-No	52.3996	Control_ No-No
40	Control	2007	770	37.0758	0.619	0.0167	0.04815	0.0008039	No-No	117.993	Control_ No-No
41	Control	2008	1500	99.2369	13.9103	0.1402	0.06616	0.009274	No-No	43.3336	Control_ No-No
42	Control	2009	840	56.0013	3.095	0.05527	0.06667	0.003685	No-No	86.6166	Control_ No-No
43	Control	2010	1140	53.3038	4.9905	0.09362	0.04676	0.004378	No-No	94.8532	Control_ No-No
44	Control	2011	1510	113.885	28.5345	0.2506	0.07542	0.0189	No-No	41.3004	Control_ No-No
45	Control	2013	1500	84.6071	52.3668	0.6189	0.0564	0.03491	No-No	46.7843	Control_ No-No
46	Control	2014	1500	67.5195	12.4417	0.1843	0.04501	0.008294	No-No	98.6809	Control_ No-No
47	Control	2015	1500	73.5285	8.4193	0.1145	0.04902	0.005613	No-No	82.2239	Control_ No-No
48	Control	2016	160	20.2787	12.3955	0.6113	0.1267	0.07747	No-No	89.3646	Control_ No-No
49	Control	2018	1500	69.4997	11.4138	0.1642	0.04633	0.007609	No-No	72.7894	Control_ No-No
50	Control	2019	1500	81.4038	12.1614	0.1494	0.05427	0.008108	No-No	45.2608	Control_ No-No
51	Control	2020	1500	132.681	22.5319	0.1698	0.08845	0.01502	No-No	46.9586	Control_ No-No
52	Control	2022	1510	192.697	7.756	0.04025	0.1276	0.005136	No-No	42.4037	Control_ No-No
53	Control	2023	1510	98.65	28.855	0.2925	0.06533	0.01911	No-No	54.668	Control_ No-No
54	Control	2026	1500	123.942	6.6668	0.05379	0.08263	0.004445	No-No	48.4739	Control_ No-No
55	Control	2027	1510	162.029	81.7103	0.5043	0.1073	0.05411	No-No	32.8566	Control_ No-No
56	Control	2028	1500	56.5959	7.4537	0.1317	0.03773	0.004969	No-No	54.4769	Control_ No-No
57	Control	2029	1500	172.386	3.6094	0.02094	0.1149	0.002406	No-No	79.7247	Control_ No-No
58	Control	2031	1500	94.885	11.6793	0.1231	0.06326	0.007786	No-No	50.4523	Control_ No-No
59	Control	2033	1510	50.2593	3.3334	0.06632	0.03328	0.002208	No-No	84.8905	Control_ No-No
60	Control	2035	740	27.328	6.6668	0.244	0.03693	0.009009	No-No	97.589	Control_ No-No
61	Control	2039	140	4.4791	1.238	0.2764	0.03199	0.008843	No-No	106.296	Control_ No-No
62	Control	2040	700	29.4581	6.5801	0.2234	0.04208	0.0094	No-No	87.6538	Control_ No-No
63	Control	2041	1500	96.8863	42.4771	0.4384	0.06459	0.02832	No-No	51.9265	Control_ No-No
64	Control	2043	1500	49.7686	4.4637	0.08969	0.03318	0.002976	No-No	82.913	Control_ No-No
65	Control	2044	1500	85.394	8.4193	0.09859	0.05693	0.005613	No-No	74.0617	Control_ No-No
66	Control	2045	1500	95.5692	17.1207	0.1791	0.06371	0.01141	No-No	35.5387	Control_ No-No
67	Control	2046	470	54.7218	4.4637	0.08157	0.1164	0.009497	No-No	107.114	Control_ No-No
68	Control	2047	1500	128.57	22.5914	0.1757	0.08571	0.01506	No-No	67.7035	Control_ No-No
69	Control	2048	1500	146.265	8.5994	0.05879	0.09751	0.005733	No-No	66.2458	Control_ No-No
70	Control	2049	1500	126.315	19.3481	0.1532	0.08421	0.0129	No-No	51.8484	Control_ No-No
71	Control	2050	1500	61.4493	4.377	0.07123	0.04097	0.002918	No-No	68.6051	Control_ No-No
72	Control	3001	1510	128.019	17.5953	0.1374	0.08478	0.01165	No-No	54.5521	Control_ No-No
73	Control	3002	780	66.8038	14.4374	0.2161	0.08565	0.01851	No-Yes	44.9678	Control_ No-Yes
74	Control	3005	1500	146.46	33.3342	0.2276	0.09764	0.02222	No-No	73.6035	Control_ No-No
75	Control	3006	1500	143.424	19.7499	0.1377	0.09562	0.01317	No-No	103.049	Control_ No-No
76	Control	3007	1510	93.7327	13.0137	0.1388	0.06207	0.008618	No-No	74.1982	Control_ No-No
77	Control	3008	1500	95.983	9.3672	0.09759	0.06399	0.006245	No-No	73.3099	Control_ No-No
78	Control	3009	1500	87.6437	9.4283	0.1076	0.05843	0.006286	No-No	80.5405	Control_ No-No
79	Control	3010	1510	111.155	29.815	0.2682	0.07361	0.01975	No-No	44.578	Control_ No-No
80	Control	3011	1500	77.3037	8.5994	0.1112	0.05154	0.005733	No-No	100.181	Control_ No-No
81	Control	3012	610	40.321	4.4637	0.1107	0.0661	0.007317	No-No	99.9047	Control_ No-No
82	Control	3013	1500	135.133	4.9905	0.03693	0.09009	0.003327	No-No	57.8846	Control_ No-No
83	Control	3014	170	21.4994	3.1563	0.1468	0.1265	0.01857	No-No	118.298	Control_ No-No
84	Control	3015	1500	103.745	15.7815	0.1521	0.06916	0.01052	No-No	52.173	Control_ No-No
85	Control	3016	1510	105.343	13.6321	0.1294	0.06976	0.009028	No-No	70.5883	Control_ No-No
86	Control	3017	1500	111.88	7.5559	0.06754	0.07459	0.005037	No-No	106.72	Control_ No-No
87	Control	3018	1500	92.3681	11.3802	0.1232	0.06158	0.007587	No-No	59.3995	Control_ No-No
88	Control	3019	1500	87.7519	9.1394	0.1042	0.0585	0.006093	No-No	82.8265	Control_ No-No
89	Control	3020	1500	99.6889	4.9905	0.05006	0.06646	0.003327	No-No	56.765	Control_ No-No
90	Control	3021	1510	100.385	30.5387	0.3042	0.06648	0.02022	No-No	70.5466	Control_ No-No
91	Control	3022	1510	128.928	12.746	0.09886	0.08538	0.008441	No-No	39.9803	Control_ No-No
92	Control	3023	1500	75.6177	13.2905	0.1758	0.05041	0.00886	No-No	56.3931	Control_ No-No
93	Control	3024	1490	74.3527	8.0708	0.1085	0.0499	0.005417	No-Yes	32.6674	Control_ No-Yes
94	Control	3025	1510	72.9728	1.3841	0.01897	0.04833	0.0009166	No-No	30.7048	Control_ No-No
95	Control	3026	1500	57.8572	6.5801	0.1137	0.03857	0.004387	No-No	62.3031	Control_ No-No
96	Control	3027	1500	85.3036	5.7069	0.0669	0.05687	0.003805	No-No	59.1323	Control_ No-No
97	Control	3028	1520	103.456	19.2588	0.1862	0.06806	0.01267	No-No	73.9969	Control_ No-No
98	Control	3029	920	72.3182	12.2868	0.1699	0.07861	0.01336	No-Yes	37.0064	Control_ No-Yes
99	Control	3030	110	3.3514	0.8754	0.2612	0.03047	0.007958	No-Yes	28.401	Control_ No-Yes
100	Control	3031	1500	111.773	6.4625	0.05782	0.07452	0.004308	No-No	65.4046	Control_ No-No
101	Control	3033	1510	108.867	19.8177	0.182	0.0721	0.01312	No-No	73.7943	Control_ No-No
102	Control	3034	1500	66.5368	1.7508	0.02631	0.04436	0.001167	No-No	62.1344	Control_ No-No
103	Control	3035	1510	79.7651	6.8371	0.08572	0.05282	0.004528	No-No	52.5319	Control_ No-No
104	Control	3037	1500	131.269	6.9206	0.05272	0.08751	0.004614	No-No	52.7183	Control_ No-No
105	Control	3038	1500	116.067	16.3889	0.1412	0.07738	0.01093	No-No	55.6468	Control_ No-No
106	Control	3039	1500	103.9	11.1592	0.1074	0.06927	0.007439	No-No	40.6084	Control_ No-No
107	Control	3040	1500	78.3806	13.2905	0.1696	0.05225	0.00886	No-No	111.723	Control_ No-No
108	Control	3041	1500	91.8775	5.8396	0.06356	0.06125	0.003893	No-No	109.363	Control_ No-No
109	Control	3042	150	11.0839	0.8754	0.07898	0.07389	0.005836	No-No	88.4068	Control_ No-No
110	Control	3044	1500	94.8754	9.2021	0.09699	0.06325	0.006135	No-No	53.0397	Control_ No-No
111	Control	3045	1500	90.5695	18.3312	0.2024	0.06038	0.01222	No-No	86.8188	Control_ No-No
112	Control	3046	1510	118.789	27.4113	0.2308	0.07867	0.01815	No-No	66.6668	Control_ No-No
113	Control	3047	1510	108.186	7.5559	0.06984	0.07165	0.005004	No-No	48.9089	Control_ No-No
114	Control	3048	1510	97.2688	12.9251	0.1329	0.06442	0.00856	No-No	42.7369	Control_ No-No
115	Control	3049	1510	91.435	8.9273	0.09764	0.06055	0.005912	No-No	61.0134	Control_ No-No
116	Control	4002	1500	107.851	3.1563	0.02927	0.0719	0.002104	No-No	95.1218	Control_ No-No
117	Control	4003	1500	115.772	14.6089	0.1262	0.07718	0.009739	No-No	41.3821	Control_ No-No
118	Control	4004	540	44.9647	5.7069	0.1269	0.08327	0.01057	No-No	91.4864	Control_ No-No
119	Control	4005	960	92.4246	12.5338	0.1356	0.09628	0.01306	No-No	96.368	Control_ No-No
120	Control	4006	1500	94.6302	22.903	0.242	0.06309	0.01527	No-No	82.958	Control_ No-No
121	Control	4008	1500	89.7606	6.19	0.06896	0.05984	0.004127	No-No	91.0489	Control_ No-No
122	Control	4009	1230	120.597	17.6062	0.146	0.09805	0.01431	No-Yes	43.8774	Control_ No-Yes
123	Control	4010	1500	137.192	23.0032	0.1677	0.09146	0.01534	No-No	71.2377	Control_ No-No
124	Control	4011	1500	106.294	9.2021	0.08657	0.07086	0.006135	No-No	55.981	Control_ No-No
125	Control	4012	1500	97.0828	10.0766	0.1038	0.06472	0.006718	No-No	60.6901	Control_ No-No
126	Control	4013	1500	146.703	6.19	0.04219	0.0978	0.004127	No-No	81.5492	Control_ No-No
127	Control	4014	1500	90.1445	7.4537	0.08269	0.0601	0.004969	No-No	84.7576	Control_ No-No
128	Control	4015	1500	45.4728	4.9905	0.1097	0.03032	0.003327	No-No	86.2293	Control_ No-No
129	Control	4017	1500	87.6041	8.5994	0.09816	0.0584	0.005733	No-No	67.9314	Control_ No-No
130	Control	4019	1500	104.786	4.1524	0.03963	0.06986	0.002768	No-No	85.9272	Control_ No-No
131	Control	4020	1500	99.2065	10.1524	0.1023	0.06614	0.006768	No-No	88.8456	Control_ No-No
132	Control	4021	1500	75.744	3.6094	0.04765	0.0505	0.002406	No-No	37.3946	Control_ No-No
133	Control	4022	1500	105.464	13.6321	0.1293	0.07031	0.009088	No-No	48.9529	Control_ No-No
134	Control	4024	1500	115.174	9.7872	0.08498	0.07678	0.006525	No-No	72.0892	Control_ No-No
135	Control	4025	1500	58.1584	14.4507	0.2485	0.03877	0.009634	No-No	33.7775	Control_ No-No
136	Control	4026	1500	121.374	15.4874	0.1276	0.08092	0.01032	No-No	70.7567	Control_ No-No
137	Control	4027	1300	69.5957	7.8298	0.1125	0.05354	0.006023	No-No	66.747	Control_ No-No
138	Control	4029	1510	107.085	29.1193	0.2719	0.07092	0.01928	No-No	60.2752	Control_ No-No
139	Control	4030	640	15.7731	2.6262	0.1665	0.02465	0.004103	No-No	75.8254	Control_ No-No
140	Control	4031	1500	83.7854	11.9067	0.1421	0.05586	0.007938	No-No	75.3985	Control_ No-No
141	Control	4032	1500	93.6219	12.2086	0.1304	0.06241	0.008139	No-No	39.942	Control_ No-No
142	Control	4033	1500	95.6548	21.7709	0.2276	0.06377	0.01451	No-No	47.9986	Control_ No-No
143	Control	4036	1500	44.1574	3.095	0.07009	0.02944	0.002063	No-No	54.415	Control_ No-No
144	Control	4037	1500	96.053	18.5803	0.1934	0.06404	0.01239	No-No	44.6269	Control_ No-No
145	Control	4038	1500	43.114	7.0577	0.1637	0.02874	0.004705	No-No	83.6421	Control_ No-No
146	Control	4039	110	13.0846	8.1417	0.6222	0.119	0.07402	No-No	90.1128	Control_ No-No
147	Control	4040	1140	62.179	19.5745	0.3148	0.05454	0.01717	No-No	79.1478	Control_ No-No
148	Control	4041	1240	62.8945	4.1524	0.06602	0.05072	0.003349	No-Yes	35.4906	Control_ No-Yes
149	Control	4042	1500	70.6893	13.5898	0.1922	0.04713	0.00906	No-No	61.66	Control_ No-No
150	Control	4043	1500	56.8677	22.2926	0.392	0.03791	0.01486	No-No	82.898	Control_ No-No
151	Control	4044	1500	30.0973	3.6094	0.1199	0.02006	0.002406	No-No	57.4421	Control_ No-No
152	Control	4045	1500	163.888	13.5192	0.08249	0.1093	0.009013	No-No	50.7592	Control_ No-No
153	Control	4046	860	27.7485	6.4625	0.2329	0.03227	0.007515	No-No	109.081	Control_ No-No
154	Control	4047	1500	91.7632	16.7245	0.1823	0.06118	0.01115	No-No	48.9425	Control_ No-No
155	Control	4048	1500	72.9538	18.6215	0.2553	0.04864	0.01241	No-No	79.7476	Control_ No-No
156	Control	4049	1500	74.7424	1.9574	0.02619	0.04983	0.001305	No-No	65.225	Control_ No-No
157	Control	4050	1500	70.9137	17.5298	0.2472	0.04728	0.01169	No-No	66.0073	Control_ No-No
158	Control	5001	1510	195.116	32.9527	0.1689	0.1292	0.02182	No-No	39.6231	Control_ No-No
159	Control	5002	1520	145.857	57.0018	0.3908	0.09596	0.0375	No-No	94.8502	Control_ No-No
160	Control	5004	1510	116.944	24.1727	0.2067	0.07745	0.01601	No-No	91.3702	Control_ No-No
161	Control	5005	1280	118.656	46.7867	0.3943	0.0927	0.03655	No-Yes	55.1726	Control_ No-Yes
162	Control	5006	1500	87.3581	25.4092	0.2909	0.05824	0.01694	No-No	87.6583	Control_ No-No
163	Control	5008	280	32.8468	13.744	0.4184	0.1173	0.04909	No-No	74.6013	Control_ No-No
164	Control	5010	1500	129.854	14.9716	0.1153	0.08657	0.009981	No-No	54.8485	Control_ No-No
165	Control	5011	1500	112.633	16.3421	0.1451	0.07509	0.01089	No-No	98.6722	Control_ No-No
166	Control	5013	880	88.9014	20.4925	0.2305	0.101	0.02329	No-No	89.4392	Control_ No-No
167	Control	5014	1180	116.559	14.1154	0.1211	0.09878	0.01196	No-No	75.6217	Control_ No-No
168	Control	5015	1500	114.454	23.3585	0.2041	0.0763	0.01557	No-No	58.9492	Control_ No-No
169	Control	5016	1510	139.12	25.4995	0.1833	0.09213	0.01689	No-No	61.6653	Control_ No-No
170	Control	5018	1500	138.421	21.3443	0.1542	0.09228	0.01423	No-No	70.6975	Control_ No-No
171	Control	5019	240	21.6402	4.8345	0.2234	0.09017	0.02014	No-No	113.335	Control_ No-No
172	Control	5020	1270	154.448	83.4572	0.5404	0.1216	0.06571	No-Yes	71.8261	Control_ No-Yes
173	Control	5021	1490	174.732	28.5345	0.1633	0.1173	0.01915	No-No	38.8402	Control_ No-No
174	Control	5022	110	13.7597	3.7652	0.2736	0.1251	0.03423	No-No	88.0304	Control_ No-No
175	Control	5023	840	99.5081	35.9233	0.361	0.1185	0.04277	No-Yes	67.5775	Control_ No-Yes
176	Control	5024	1510	135.361	20.6601	0.1526	0.08964	0.01368	No-No	49.961	Control_ No-No
177	Control	5025	1510	144.655	24.8604	0.1719	0.0958	0.01646	No-No	53.4992	Control_ No-No
178	Control	5026	180	20.9873	6.373	0.3037	0.1166	0.03541	No-No	89.4968	Control_ No-No
179	Control	5027	1120	96.6139	31.2825	0.3238	0.08626	0.02793	No-Yes	67.4892	Control_ No-Yes
180	Control	5028	1510	152.452	13.391	0.08784	0.101	0.008868	No-No	59.4124	Control_ No-No
181	Control	5030	830	83.729	35.5858	0.425	0.1009	0.04287	No-Yes	62.5186	Control_ No-Yes
182	Control	5031	380	26.8511	3.7652	0.1402	0.07066	0.009909	No-No	110.162	Control_ No-No
183	Control	5032	640	62.1521	22.9114	0.3686	0.09711	0.0358	No-Yes	53.1998	Control_ No-Yes
184	Control	5035	1510	94.7269	10.2463	0.1082	0.06273	0.006786	No-No	66.6881	Control_ No-No
185	Control	5039	1510	142.037	25.1972	0.1774	0.09406	0.01669	No-No	87.6238	Control_ No-No
186	Control	5040	1500	117.488	27.1938	0.2315	0.07833	0.01813	No-No	60.9969	Control_ No-No
187	Control	5042	1290	166.201	46.0729	0.2772	0.1288	0.03572	No-Yes	77.2072	Control_ No-Yes
188	Control	5043	1360	127.698	31.2457	0.2447	0.0939	0.02297	No-No	73.8041	Control_ No-No
189	Control	5044	1500	117.716	21.7003	0.1843	0.07848	0.01447	No-No	41.8604	Control_ No-No
190	Control	5045	1520	115.726	8.3278	0.07196	0.07614	0.005479	No-No	57.9445	Control_ No-No
191	Control	5047	110	11.6506	1.3841	0.1188	0.1059	0.01258	No-No	78.4953	Control_ No-No
192	Control	5049	1510	88.2719	29.4074	0.3331	0.05846	0.01948	No-No	77.0149	Control_ No-No
193	Control	5050	1510	122.248	35.4347	0.2899	0.08096	0.02347	No-No	73.7157	Control_ No-No
194	Control	6001	1000	117.309	38.4827	0.328	0.1173	0.03848	No-No	32.0331	Control_ No-No
195	Control	6002	240	26.0238	7.9271	0.3046	0.1084	0.03303	No-Yes	57.3348	Control_ No-Yes
196	Control	6004	1000	85.3163	11.6793	0.1369	0.08532	0.01168	No-No	48.0409	Control_ No-No
197	Control	6005	1000	77.1397	26.8749	0.3484	0.07714	0.02687	No-No	54.5844	Control_ No-No
198	Control	6006	1000	59.0744	17.4751	0.2958	0.05907	0.01748	No-No	65.1191	Control_ No-No
199	Control	6007	1000	56.2152	32.8304	0.584	0.05622	0.03283	No-No	43.5216	Control_ No-No
200	Control	6010	310	19.7604	7.4537	0.3772	0.06374	0.02404	No-Yes	49.369	Control_ No-Yes
201	Control	6011	1010	27.568	14.6089	0.5299	0.0273	0.01446	No-No	62.8048	Control_ No-No
202	Control	6012	1000	49.8567	26.9034	0.5396	0.04986	0.0269	No-No	32.2292	Control_ No-No
203	Control	6013	1000	39.4189	14.2505	0.3615	0.03942	0.01425	No-No	78.0092	Control_ No-No
204	Control	6015	1000	113.351	11.5141	0.1016	0.1134	0.01151	No-No	93.5119	Control_ No-No
205	Control	6016	1000	94.5103	42.2056	0.4466	0.09451	0.04221	No-No	75.7974	Control_ No-No
206	Control	6017	1000	59.2373	25.2503	0.4263	0.05924	0.02525	No-No	70.1839	Control_ No-No
207	Control	6018	1000	64.7232	30.7824	0.4756	0.06472	0.03078	No-No	42.5122	Control_ No-No
208	Control	6020	460	18.5285	3.1563	0.1703	0.04028	0.006862	No-No	107.33	Control_ No-No
209	Control	6022	1000	110.303	13.3337	0.1209	0.1103	0.01333	No-No	68.0579	Control_ No-No
210	Control	6024	1000	61.9374	13.5192	0.2183	0.06194	0.01352	No-No	96.7735	Control_ No-No
211	Control	6025	1000	121.826	16.0702	0.1319	0.1218	0.01607	No-No	71.2947	Control_ No-No
212	Control	6026	1000	80.6535	29.8792	0.3705	0.08065	0.02988	No-No	59.407	Control_ No-No
213	Control	6027	1000	63.1264	0.619	0.009806	0.06313	0.000619	No-No	91.3537	Control_ No-No
214	Control	6028	150	22.416	10.5412	0.4703	0.1494	0.07027	No-Yes	38.5597	Control_ No-Yes
215	Control	6030	1000	102.811	28.0264	0.2726	0.1028	0.02803	No-No	67.0404	Control_ No-No
216	Control	6032	1000	68.9153	26.123	0.3791	0.06892	0.02612	No-No	36.2615	Control_ No-No
217	Control	6033	180	13.6758	4.377	0.3201	0.07598	0.02432	No-No	64.5528	Control_ No-No
218	Control	6035	1000	74.2144	9.9811	0.1345	0.07421	0.009981	No-No	49.7001	Control_ No-No
219	Control	6036	1000	53.0815	23.3093	0.4391	0.05308	0.02331	No-No	69.4234	Control_ No-No
220	Control	6039	1000	94.4573	33.0166	0.3495	0.09446	0.03302	No-No	43.4104	Control_ No-No
221	Control	6041	330	55.2953	5.7069	0.1032	0.1676	0.01729	No-Yes	33.7705	Control_ No-Yes
222	Control	6042	1010	58.2314	7.0577	0.1212	0.05765	0.006988	No-No	77.2767	Control_ No-No
223	Control	6045	1010	219.973	93.2124	0.4237	0.2178	0.09229	No-No	101.831	Control_ No-No
224	Control	6046	1000	61.2843	30.6389	0.4999	0.06128	0.03064	No-No	45.715	Control_ No-No
225	Control	6047	1000	42.0361	17.4312	0.4147	0.04204	0.01743	No-No	83.223	Control_ No-No
226	Control	6049	220	4.0063	3.9149	0.9772	0.01821	0.01779	No-No	100.665	Control_ No-No
227	Control	6050	1000	136.052	42.1329	0.3097	0.1361	0.04213	No-No	56.5218	Control_ No-No
228	Control	7001	1510	88.9858	20.6137	0.2317	0.05893	0.01365	No-No	102.46	Control_ No-No
229	Control	7002	320	23.7781	1.238	0.05206	0.07431	0.003869	No-No	118.71	Control_ No-No
230	Control	7003	640	33.354	2.2318	0.06691	0.05212	0.003487	No-No	105.026	Control_ No-No
231	Control	7004	1510	75.9155	17.5189	0.2308	0.05028	0.0116	No-No	47.3448	Control_ No-No
232	Control	7005	1530	106.847	13.6742	0.128	0.06983	0.008937	No-No	69.9745	Control_ No-No
233	Control	7006	600	45.8428	12.5338	0.2734	0.0764	0.02089	No-Yes	41.3461	Control_ No-Yes
234	Control	7007	1510	112.52	13.0578	0.116	0.07452	0.008648	No-No	57.6915	Control_ No-No
235	Control	7008	890	72.0479	7.5305	0.1045	0.08095	0.008461	No-No	91.036	Control_ No-No
236	Control	7009	1420	148.625	65.3595	0.4398	0.1047	0.04603	No-Yes	53.9574	Control_ No-Yes
237	Control	7012	1510	100.352	7.4537	0.07428	0.06646	0.004936	No-No	40.9802	Control_ No-No
238	Control	7014	1500	100.667	13.6742	0.1358	0.06711	0.009116	No-No	61.9771	Control_ No-No
239	Control	7015	420	46.3358	10.1524	0.2191	0.1103	0.02417	No-No	51.7222	Control_ No-No
240	Control	7016	110	17.9369	1.857	0.1035	0.1631	0.01688	No-Yes	36.7586	Control_ No-Yes
241	Control	7017	1220	92.6076	19.8177	0.214	0.07591	0.01624	No-No	89.7765	Control_ No-No
242	Control	7018	1540	122.74	34.247	0.279	0.0797	0.02224	No-No	60.5168	Control_ No-No
243	Control	7019	720	55.3266	10.0003	0.1807	0.07684	0.01389	No-No	102.234	Control_ No-No
244	Control	7020	1510	125.374	7.428	0.05925	0.08303	0.004919	No-No	43.3571	Control_ No-No
245	Control	7024	300	21.4621	12.0188	0.56	0.07154	0.04006	No-Yes	44.0652	Control_ No-Yes
246	Control	7025	460	62.8714	49.6938	0.7904	0.1367	0.108	No-Yes	70.3525	Control_ No-Yes
247	Control	7026	800	104.808	42.6392	0.4068	0.131	0.0533	No-Yes	70.2874	Control_ No-Yes
248	Control	7027	1500	106.945	12.4571	0.1165	0.0713	0.008305	No-No	48.5345	Control_ No-No
249	Control	7028	680	42.1592	5.7069	0.1354	0.062	0.008392	No-No	95.8346	Control_ No-No
250	Control	7029	360	38.3968	20.4176	0.5318	0.1067	0.05672	No-No	122.443	Control_ No-No
251	Control	7030	1500	86.009	5.6053	0.06517	0.05734	0.003737	No-No	84.7847	Control_ No-No
252	Control	7031	1500	160.604	34.8514	0.217	0.1071	0.02323	No-No	39.3214	Control_ No-No
253	Control	7032	370	40.3585	10.8104	0.2679	0.1091	0.02922	No-Yes	42.484	Control_ No-Yes
254	Control	7033	1410	77.8837	27.9648	0.3591	0.05524	0.01983	No-No	115.354	Control_ No-No
255	Control	7035	1510	117.297	27.4881	0.2343	0.07768	0.0182	No-No	81.2528	Control_ No-No
256	Control	7036	1500	98.1937	19.199	0.1955	0.06546	0.0128	No-No	83.8253	Control_ No-No
257	Control	7037	270	13.3558	4.5064	0.3374	0.04947	0.01669	No-No	145.169	Control_ No-No
258	Control	7038	350	29.9346	10.8281	0.3617	0.08553	0.03094	No-No	100.719	Control_ No-No
259	Control	7039	1150	98.375	50.1352	0.5096	0.08554	0.0436	No-Yes	73.1501	Control_ No-Yes
260	Control	7040	190	10.2362	7.0577	0.6895	0.05387	0.03715	No-No	102.915	Control_ No-No
261	Control	7041	1500	108.182	3.3334	0.03081	0.07212	0.002222	No-No	45.2668	Control_ No-No
262	Control	7042	390	36.108	15.5121	0.4296	0.09258	0.03977	No-No	64.754	Control_ No-No
263	Control	7043	240	25.7471	3.6094	0.1402	0.1073	0.01504	No-No	96.1973	Control_ No-No
264	Control	7044	1500	108.933	7.0577	0.06479	0.07262	0.004705	No-No	80.6748	Control_ No-No
265	Control	7045	850	43.8588	4.4637	0.1018	0.0516	0.005251	No-No	93.814	Control_ No-No
266	Control	7046	790	79.7456	26.6673	0.3344	0.1009	0.03376	No-No	94.362	Control_ No-No
267	Control	7047	1500	148.505	43.5329	0.2931	0.099	0.02902	No-No	96.5192	Control_ No-No
268	Control	7048	350	32.3082	7.9271	0.2454	0.09231	0.02265	No-No	114.354	Control_ No-No
269	Control	7049	1010	83.8854	16.3421	0.1948	0.08305	0.01618	No-No	79.5492	Control_ No-No
270	Control	7050	1510	121.291	13.6321	0.1124	0.08033	0.009028	No-No	53.0021	Control_ No-No
271	Control	8002	1490	116.608	11.826	0.1014	0.07826	0.007937	No-No	86.9863	Control_ No-No
272	Control	8003	1250	41.5731	12.761	0.307	0.03326	0.01021	No-No	86.6076	Control_ No-No
273	Control	8004	1500	57.4847	13.5757	0.2362	0.03832	0.00905	No-No	89.7621	Control_ No-No
274	Control	8005	1500	81.6408	29.0996	0.3564	0.05443	0.0194	No-No	84.4898	Control_ No-No
275	Control	8006	1500	80.0454	16.6095	0.2075	0.05336	0.01107	No-No	84.594	Control_ No-No
276	Control	8008	1500	113.697	31.0859	0.2734	0.0758	0.02072	No-No	71.6114	Control_ No-No
277	Control	8009	1500	54.2274	0.8754	0.01614	0.03615	0.0005836	No-No	73.1554	Control_ No-No
278	Control	8011	1500	55.9145	6.19	0.1107	0.03728	0.004127	No-No	64.0432	Control_ No-No
279	Control	8012	1490	53.8518	10.5412	0.1957	0.03614	0.007075	No-No	36.3416	Control_ No-No
280	Control	8013	1500	108.63	8.3278	0.07666	0.07242	0.005552	No-No	49.0845	Control_ No-No
281	Control	8014	1500	89.4896	26.8749	0.3003	0.05966	0.01792	No-No	64.9487	Control_ No-No
282	Control	8015	1500	138.789	32.194	0.232	0.09253	0.02146	No-No	64.3376	Control_ No-No
283	Control	8016	1500	44.9652	6.19	0.1377	0.02998	0.004127	No-No	84.6194	Control_ No-No
284	Control	8017	730	26.6137	16.8386	0.6327	0.03646	0.02307	No-No	99.1008	Control_ No-No
285	Control	8018	1530	156.519	15.5121	0.09911	0.1023	0.01014	No-No	38.1293	Control_ No-No
286	Control	8021	1490	106.245	31.0242	0.292	0.07131	0.02082	No-No	45.5751	Control_ No-No
287	Control	8022	450	10.251	0.619	0.06038	0.02278	0.001376	No-No	108.313	Control_ No-No
288	Control	8023	1500	39.5676	2.2318	0.05641	0.02638	0.001488	No-No	96.2093	Control_ No-No
289	Control	8024	1500	94.6226	16.8954	0.1786	0.06308	0.01126	No-No	52.2241	Control_ No-No
290	Control	8025	500	18.5021	4.9905	0.2697	0.037	0.009981	No-No	120.627	Control_ No-No
291	Control	8026	930	22.7149	5.8723	0.2585	0.02442	0.006314	No-No	96.1848	Control_ No-No
292	Control	8027	900	20.6128	4.9905	0.2421	0.0229	0.005545	No-No	97.9449	Control_ No-No
293	Control	8028	980	25.7045	6.19	0.2408	0.02623	0.006316	No-No	125.314	Control_ No-No
294	Control	8029	1500	68.252	13.131	0.1924	0.0455	0.008754	No-No	83.831	Control_ No-No
295	Control	8030	260	14.9866	8.6217	0.5753	0.05764	0.03316	No-No	111.868	Control_ No-No
296	Control	8031	960	89.6181	22.284	0.2487	0.09335	0.02321	No-No	90.4928	Control_ No-No
297	Control	8032	360	4.5894	2.7683	0.6032	0.01275	0.00769	No-No	99.2032	Control_ No-No
298	Control	8033	1500	52.6993	10.6497	0.2021	0.03513	0.0071	No-No	77.1351	Control_ No-No
299	Control	8035	1500	102.173	43.2282	0.4231	0.06812	0.02882	No-No	28.8978	Control_ No-No
300	Control	8036	1510	254.233	16.6671	0.06556	0.1684	0.01104	No-No	23.8029	Control_ No-No
301	Control	8037	1500	67.7415	12.5338	0.185	0.04516	0.008356	No-No	45.6721	Control_ No-No
302	Control	8038	1500	75.5112	4.8345	0.06402	0.05034	0.003223	No-No	40.0387	Control_ No-No
303	Control	8039	1500	75.5686	8.8627	0.1173	0.05038	0.005908	No-No	102.547	Control_ No-No
304	Control	8040	310	4.1524	1.3841	0.3333	0.01339	0.004465	No-No	115.553	Control_ No-No
305	Control	8041	1040	94.5508	4.4637	0.04721	0.09091	0.004292	No-No	107.78	Control_ No-No
306	Control	8043	840	42.2555	20.7988	0.4922	0.0503	0.02476	No-No	89.3903	Control_ No-No
307	Control	8045	830	19.8943	2.7683	0.1391	0.02397	0.003335	No-No	100.52	Control_ No-No
308	Control	8046	710	20.7257	3.7652	0.1817	0.02919	0.005303	No-No	113.833	Control_ No-No
309	Control	8047	1500	73.2985	10.0766	0.1375	0.04887	0.006718	No-No	31.6506	Control_ No-No
310	Control	8048	1500	41.3993	11.3802	0.2749	0.0276	0.007587	No-No	75.4982	Control_ No-No
311	Control	8049	1500	95.736	17.617	0.184	0.06382	0.01174	No-No	69.5017	Control_ No-No
312	Control	8050	1500	188.905	75.0242	0.3972	0.1259	0.05002	No-No	58.032	Control_ No-No
313	Control	8051	850	30.2768	5.5365	0.1829	0.03562	0.006514	No-No	123.994	Control_ No-No
314	Control	8052	1200	66.1121	19.8177	0.2998	0.05509	0.01651	No-No	92.905	Control_ No-No
315	Control	8053	810	32.6592	6.9206	0.2119	0.04032	0.008544	No-No	108.545	Control_ No-No
316	Control	8054	1500	103.707	24.3622	0.2349	0.06914	0.01624	No-No	79.7984	Control_ No-No
317	Control	8058	980	23.1837	10.523	0.4539	0.02366	0.01074	No-No	110.241	Control_ No-No
318	Control	8059	1500	93.0334	4.5064	0.04844	0.06202	0.003004	No-No	32.4005	Control_ No-No
319	Control	8060	1500	32.5325	3.095	0.09514	0.02169	0.002063	No-No	100.93	Control_ No-No
320	FGF-LDN	1	100	34.3312	13.618	0.3967	0.3433	0.1362	No-No	119.661	FGF-LDN_ No-No
321	FGF-LDN	2	280	51.2133	27.243	0.532	0.1829	0.0973	No-Yes	50.7014	FGF-LDN_ No-Yes
322	FGF-LDN	3	2360	278.145	26.1156	0.09389	0.1179	0.01107	No-No	102.994	FGF-LDN_ No-No
323	FGF-LDN	4	2380	210.812	24.3936	0.1157	0.08858	0.01025	No-No	59.1202	FGF-LDN_ No-No
324	FGF-LDN	5	2370	266.863	35.5481	0.1332	0.1126	0.015	No-No	91.2117	FGF-LDN_ No-No
325	FGF-LDN	6	970	90.8435	27.1797	0.2992	0.09365	0.02802	No-Yes	42.4771	FGF-LDN_ No-Yes
326	FGF-LDN	9	1090	116.726	14.1289	0.121	0.1071	0.01296	No-No	34.6695	FGF-LDN_ No-No
327	FGF-LDN	11	2370	300.69	42.5132	0.1414	0.1269	0.01794	No-No	87.5398	FGF-LDN_ No-No
328	FGF-LDN	12	2360	221.364	9.6889	0.04377	0.0938	0.004105	No-No	120.419	FGF-LDN_ No-No
329	FGF-LDN	13	2360	187.897	18.4042	0.09795	0.07962	0.007798	No-No	76.4058	FGF-LDN_ No-No
330	FGF-LDN	14	2360	245.79	53.2376	0.2166	0.1041	0.02256	No-No	70.4709	FGF-LDN_ No-No
331	FGF-LDN	15	1240	107.076	26.1156	0.2439	0.08635	0.02106	No-No	59.7391	FGF-LDN_ No-No
332	FGF-LDN	16	1660	216.162	61.3591	0.2839	0.1302	0.03696	No-No	83.4457	FGF-LDN_ No-No
333	FGF-LDN	17	270	25.3729	14.9075	0.5875	0.09397	0.05521	No-Yes	38.7555	FGF-LDN_ No-Yes
334	FGF-LDN	19	740	54.8182	10.3763	0.1893	0.07408	0.01402	No-No	147.131	FGF-LDN_ No-No
335	FGF-LDN	20	2360	258.021	53.428	0.2071	0.1093	0.02264	No-No	77.0549	FGF-LDN_ No-No
336	FGF-LDN	21	2350	234.278	12.38	0.05284	0.09969	0.005268	No-No	126.106	FGF-LDN_ No-No
337	FGF-LDN	22	2360	284.672	74.7941	0.2627	0.1206	0.03169	No-No	94.1206	FGF-LDN_ No-No
338	FGF-LDN	24	1510	200.299	84.5315	0.422	0.1326	0.05598	No-Yes	92.6124	FGF-LDN_ No-Yes
339	FGF-LDN	25	1050	144.155	24.7135	0.1714	0.1373	0.02354	No-No	79.2538	FGF-LDN_ No-No
340	FGF-LDN	26	1890	206.145	40.3254	0.1956	0.1091	0.02134	No-Yes	68.1041	FGF-LDN_ No-Yes
341	FGF-LDN	27	1390	100.278	15.9144	0.1587	0.07214	0.01145	No-No	97.0469	FGF-LDN_ No-No
342	FGF-LDN	29	770	94.1239	5.8396	0.06204	0.1222	0.007584	No-No	102.86	FGF-LDN_ No-No
343	FGF-LDN	31	1770	268.367	90.8835	0.3387	0.1516	0.05135	No-No	88.5192	FGF-LDN_ No-No
344	FGF-LDN	32	2380	224.725	34.2694	0.1525	0.09442	0.0144	No-No	134.551	FGF-LDN_ No-No
345	FGF-LDN	33	1000	98.1742	7.9271	0.08074	0.09817	0.007927	No-No	19.5451	FGF-LDN_ No-No
346	FGF-LDN	34	2360	252.975	62.7148	0.2479	0.1072	0.02657	No-No	78.8272	FGF-LDN_ No-No
347	FGF-LDN	35	2370	317	80.8429	0.255	0.1338	0.03411	No-No	146.503	FGF-LDN_ No-No
348	FGF-LDN	37	2200	239.195	70.0865	0.293	0.1087	0.03186	No-Yes	94.7414	FGF-LDN_ No-Yes
349	FGF-LDN	38	1090	105.814	13.9103	0.1315	0.09708	0.01276	No-No	35.934	FGF-LDN_ No-No
350	FGF-LDN	39	2380	280.547	56.414	0.2011	0.1179	0.0237	No-No	92.85	FGF-LDN_ No-No
351	FGF-LDN	40	1000	87.9362	24.4877	0.2785	0.08794	0.02449	No-No	56.38	FGF-LDN_ No-No
352	FGF-LDN	41	890	119.156	17.7255	0.1488	0.1339	0.01992	No-No	79.6877	FGF-LDN_ No-No
353	FGF-LDN	42	2360	223.79	35.9233	0.1605	0.09483	0.01522	No-No	83.691	FGF-LDN_ No-No
354	FGF-LDN	43	2350	253.441	43.3698	0.1711	0.1078	0.01846	No-No	55.9742	FGF-LDN_ No-No
355	FGF-LDN	44	1120	110.535	31.0489	0.2809	0.09869	0.02772	No-Yes	39.5579	FGF-LDN_ No-Yes
356	FGF-LDN	45	2070	224.183	54.1404	0.2415	0.1083	0.02615	No-No	81.7197	FGF-LDN_ No-No
357	FGF-LDN	46	2360	226.613	33.2478	0.1467	0.09602	0.01409	No-No	98.6466	FGF-LDN_ No-No
358	FGF-LDN	47	2210	292.595	28.2579	0.09658	0.1324	0.01279	No-Yes	50.1734	FGF-LDN_ No-Yes
359	FGF-LDN	48	1890	198.398	55.6446	0.2805	0.105	0.02944	No-No	53.7498	FGF-LDN_ No-No
360	FGF-LDN	49	1720	162.283	19.3778	0.1194	0.09435	0.01127	No-No	71.5956	FGF-LDN_ No-No
361	FGF-LDN	50	2200	243.905	41.4175	0.1698	0.1109	0.01883	No-Yes	67.3004	FGF-LDN_ No-Yes
362	FGF-LDN	51	2520	196.788	32.4311	0.1648	0.07809	0.01287	No-No	138.063	FGF-LDN_ No-No
363	FGF-LDN	52	1970	162.487	39.833	0.2451	0.08248	0.02022	No-Yes	44.8594	FGF-LDN_ No-Yes
364	FGF-LDN	55	2550	207.015	38.6466	0.1867	0.08118	0.01516	No-No	83.3285	FGF-LDN_ No-No
365	FGF-LDN	56	2540	257.489	14.5036	0.05633	0.1014	0.00571	No-No	113.02	FGF-LDN_ No-No
366	FGF-LDN	57	2520	269.494	30.5763	0.1135	0.1069	0.01213	No-No	75.7232	FGF-LDN_ No-No
367	FGF-LDN	59	2520	193.482	1.7508	0.009049	0.07678	0.0006948	No-No	70.9558	FGF-LDN_ No-No
368	FGF-LDN	61	2520	266.178	27.4043	0.103	0.1056	0.01087	No-No	49.0536	FGF-LDN_ No-No
369	FGF-LDN	62	2540	283.886	37.0005	0.1303	0.1118	0.01457	No-No	135.363	FGF-LDN_ No-No
370	FGF-LDN	63	2520	195.231	7.0032	0.03587	0.07747	0.002779	No-No	44.611	FGF-LDN_ No-No
371	FGF-LDN	64	2520	235.929	11.826	0.05013	0.09362	0.004693	No-No	82.9552	FGF-LDN_ No-No
372	FGF-LDN	65	2130	259.363	15.2882	0.05894	0.1218	0.007178	No-No	148.127	FGF-LDN_ No-No
373	FGF-LDN	66	620	156.243	34.0956	0.2182	0.252	0.05499	No-Yes	27.1373	FGF-LDN_ No-Yes
374	FGF-LDN	68	2520	238.621	33.8871	0.142	0.09469	0.01345	No-No	73.5543	FGF-LDN_ No-No
375	FGF-LDN	69	2520	185.747	25.6493	0.1381	0.07371	0.01018	No-No	130.027	FGF-LDN_ No-No
376	FGF-LDN	70	2520	194.259	21.8762	0.1126	0.07709	0.008681	No-No	59.3498	FGF-LDN_ No-No
377	FGF-LDN	71	920	49.0009	14.2505	0.2908	0.05326	0.01549	No-No	103.675	FGF-LDN_ No-No
378	FGF-LDN	72	2530	215.35	15.5121	0.07203	0.08512	0.006131	No-No	114.849	FGF-LDN_ No-No
379	FGF-LDN	73	2520	207.472	3.7652	0.01815	0.08233	0.001494	No-No	106.03	FGF-LDN_ No-No
380	FGF-LDN	75	1530	133.198	23.3093	0.175	0.08706	0.01523	No-Yes	17.3431	FGF-LDN_ No-Yes
381	FGF-LDN	76	2520	180.956	15.586	0.08613	0.07181	0.006185	No-No	56.6681	FGF-LDN_ No-No
382	FGF-LDN	77	1470	120.404	21.885	0.1818	0.08191	0.01489	No-No	54.5177	FGF-LDN_ No-No
383	FGF-LDN	78	1610	153.787	28.2307	0.1836	0.09552	0.01753	No-Yes	16.6095	FGF-LDN_ No-Yes
384	FGF-LDN	79	2240	170.19	3.714	0.02182	0.07598	0.001658	No-No	100.813	FGF-LDN_ No-No
385	FGF-LDN	80	1110	127.069	33.4775	0.2635	0.1145	0.03016	No-No	78.4959	FGF-LDN_ No-No
386	FGF-LDN	81	2000	186.881	34.9338	0.1869	0.09344	0.01747	No-No	54.4861	FGF-LDN_ No-No
387	FGF-LDN	82	2530	196.739	36.8552	0.1873	0.07776	0.01457	No-No	63.4679	FGF-LDN_ No-No
388	FGF-LDN	83	2530	201.851	33.3112	0.165	0.07978	0.01317	No-No	62.7667	FGF-LDN_ No-No
389	FGF-LDN	85	2510	257.99	23.3011	0.09032	0.1028	0.009283	No-No	161.073	FGF-LDN_ No-No
390	FGF-LDN	86	2520	205.94	38.283	0.1859	0.08172	0.01519	No-No	97.0706	FGF-LDN_ No-No
391	FGF-LDN	87	1100	74.9893	5.7069	0.0761	0.06817	0.005188	No-Yes	32.4016	FGF-LDN_ No-Yes
392	FGF-LDN	88	2520	218.354	14.1154	0.06464	0.08665	0.005601	No-No	122.994	FGF-LDN_ No-No
393	FGF-LDN	89	1120	78.259	20.808	0.2659	0.06987	0.01858	No-No	115.556	FGF-LDN_ No-No
394	FGF-LDN	90	2510	234.441	9.9233	0.04233	0.0934	0.003954	No-No	135.041	FGF-LDN_ No-No
395	FGF-LDN	91	2100	146.89	2.2318	0.01519	0.06995	0.001063	No-No	58.9872	FGF-LDN_ No-No
396	FGF-LDN	92	2520	251.903	28.9808	0.115	0.09996	0.0115	No-No	41.8455	FGF-LDN_ No-No
397	FGF-LDN	94	2530	244.473	7.2187	0.02953	0.09663	0.002853	No-No	79.4879	FGF-LDN_ No-No
398	FGF-LDN	95	2520	173.938	17.1654	0.09869	0.06902	0.006812	No-No	47.044	FGF-LDN_ No-No
399	FGF-LDN	96	2150	177.27	42.5447	0.24	0.08245	0.01979	No-No	80.9755	FGF-LDN_ No-No
400	FGF-LDN	99	2530	167.365	5.3248	0.03182	0.06615	0.002105	No-No	180.014	FGF-LDN_ No-No
401	FGF-LDN	100	190	36.9975	28.7752	0.7778	0.1947	0.1514	No-No	108.96	FGF-LDN_ No-No
402	FGF-LDN	102	2690	270.298	45.5207	0.1684	0.1005	0.01692	No-No	109.549	FGF-LDN_ No-No
403	FGF-LDN	103	700	75.3752	7.4537	0.09889	0.1077	0.01065	No-No	82.3294	FGF-LDN_ No-No
404	FGF-LDN	104	870	80.9708	11.021	0.1361	0.09307	0.01267	No-No	127.61	FGF-LDN_ No-No
405	FGF-LDN	105	1130	123.084	34.6032	0.2811	0.1089	0.03062	No-No	72.3277	FGF-LDN_ No-No
406	FGF-LDN	106	2690	256.979	54.8959	0.2136	0.09553	0.02041	No-No	88.5776	FGF-LDN_ No-No
407	FGF-LDN	107	2690	180.78	6.0964	0.03372	0.0672	0.002266	No-No	138.906	FGF-LDN_ No-No
408	FGF-LDN	108	2690	239.278	37.3919	0.1563	0.08895	0.0139	No-No	106.963	FGF-LDN_ No-No
409	FGF-LDN	109	1850	162.491	34.7137	0.2136	0.08783	0.01876	No-Yes	44.8466	FGF-LDN_ No-Yes
410	FGF-LDN	110	1330	119.805	19.5451	0.1631	0.09008	0.0147	No-Yes	26.8178	FGF-LDN_ No-Yes
411	FGF-LDN	111	2420	184.969	32.188	0.174	0.07643	0.0133	No-Yes	42.9079	FGF-LDN_ No-Yes
412	FGF-LDN	112	1960	174.272	41.7309	0.2395	0.08891	0.02129	No-No	52.5713	FGF-LDN_ No-No
413	FGF-LDN	113	2690	214.255	24.2123	0.113	0.07965	0.009001	No-No	103	FGF-LDN_ No-No
[truncated: 76 more rows]

## Sheet: Fig 5E Processed data
	Averages	Persistence	s.e.m	Acc. Velocity (um/min)	s.e.m	Euc. Velocity (um/min)	s.e.m
[truncated: 4 more rows]
