# Supplementary material for: Hierarchical patterning modes orchestrate hair follicle morphogenesis
Source: PLoS Biol. 2017 Jul 11;15(7):e2002117. doi: 10.1371/journal.pbio.2002117 (PMC5507405; doi:10.1371/journal.pbio.2002117)
Supplement: S2 Table — Results from experiment outlined in S2A Fig. R2 values are curve fit to exponential function. (XLSX) [file pbio.2002117.s011.xlsx]

## Sheet: RNA seq data
				DERMIS															EPIDERMIS
Ensembl gene_id	Gene name	refSeq Ids	Official abbreviation	T0 raw reads (30 min)	T0 corrected transcript abundance (30 min)	T0 raw reads (60 min)	T0 corrected transcript abundance (60 min)	T0 raw reads (120 min)	T0 corrected transcript abundance (120 min)	Mean T0 raw reads	Mean T0 corrected transcript abundance	0 min	30 min	60 min	120 min	K	t1/2 (minutes)	R2	T0 raw reads (30 min)	T0 corrected transcript abundance (30 min)	T0 raw reads (60 min)	T0 corrected transcript abundance (60 min)	T0 raw reads (120 min)	T0 corrected transcript abundance (120 min)	Mean T0 raw reads	Mean T0 corrected transcript abundance	0 min	30 min	60 min	120 min	K	t1/2 (minutes)	R2
ENSMUSG00000048489	RIKEN cDNA 8430408G22 gene	NM_001166580,NM_145980	8430408G22Rik	767	0.0535699	729	0.0473088	435	0.0367018	643.667	0.0458602	1	0.152235	0.0403128	0.029325	-0.0355901	19.4758	0.909901	12	0.000466516	5	0.000282945	8	0.000460935	8.33333	0.000403465	1	0.340351	0.481854	0.136176	-0.0166877	41.5365	0.928272
ENSMUSG00000050334	RIKEN cDNA C130071C03 gene		C130071C03Rik	6	0.000188578	1	2.92057e-05	91	0.00345479	32.6667	0.00122419	1	0.290481	0.609618	0.00934782	-0.0332008	20.8774	0.882527	0	-5.81214e-07	0	-3.28811e-08	2	5.30255e-05	0.666667	1.74705e-05	1	0.299845	-661.65	-0.00154949	N/A	N/A	N/A
ENSMUSG00000090863				1	5.62809e-05	0	-1.0232e-05	0	-6.56705e-06	0.333333	1.31606e-05	1	0.844706	0.0425512	0.0318384	-0.0321765	21.542	0.894407	7	0.000302393	10	0.000552195	11	0.000592551	9.33333	0.00048238	1	1.50444	0.216565	0.0907839	-0.0194419	35.6522	0.864488
ENSMUSG00000086844				0	-7.93621e-07	0	-5.28022e-06	0	-2.77276e-06	0	-2.94887e-06	1	0.882485	0.0283674	0.0389136	-0.0321201	21.5798	0.838808	10	0.000223059	10	0.000284961	9	0.000250189	9.66667	0.000252736	1	0.584924	0.144376	0.110958	-0.0209545	33.0787	0.935929
ENSMUSG00000085595				0	-4.33832e-06	0	-2.11671e-05	0	-1.12276e-05	0	-1.22443e-05	1	0.470659	0.0644715	0.0350223	-0.0311806	22.2301	0.951177	15	0.00121935	11	0.00114234	10	0.00101308	12	0.00112492	1	0.311959	0.328128	0.0998623	-0.020015	34.6314	0.957551
ENSMUSG00000041930	cDNA sequence BC057022	NM_001004180	Fam222a	27	0.00134591	33	0.00152112	29	0.00174082	29.6667	0.00153595	1	0.77494	0.0924882	0.0290839	-0.0304232	22.7835	0.958691	27	0.00101284	13	0.00062383	20	0.000935797	20	0.000857489	1	0.431773	0.667086	0.200235	-0.0128295	54.0276	0.900196
ENSMUSG00000041396	RIKEN cDNA 2810422O20 gene	NM_027279	Mettl18	159	0.00993601	113	0.00642705	110	0.00824727	127.333	0.00820345	1	0.333116	0.13811	0.0309532	-0.0300949	23.032	0.994921	166	0.00780861	137	0.00825785	124	0.00728342	142.333	0.00778329	1	0.508042	0.126049	0.0806043	-0.0236384	29.323	0.952339
ENSMUSG00000027513	phosphoenolpyruvate carboxykinase 1, cytosolic	NM_011044	Pck1	0	-2.69238e-07	0	-2.23916e-06	0	-2.35167e-06	0	-1.62002e-06	1	0.441243	0.0851023	0.0389136	-0.0297327	23.3126	0.966947	4	7.56735e-05	5	0.000120842	9	0.000212193	6	0.000136236	1	0.292462	0.433129	0.110958	-0.0185671	37.332	0.924788
ENSMUSG00000078995	zinc finger protein 456	NM_001001186		90	0.00295885	45	0.00135457	53	0.00209666	62.6667	0.0021367	1	0.328184	0.206029	0.0316009	-0.0287174	24.1369	0.994611	67	0.00165413	39	0.0012353	37	0.00114104	47.6667	0.00134349	1	0.559943	0.462218	0.324768	-0.010511	65.9449	0.950568
ENSMUSG00000051212	G protein-coupled receptor 183	NM_183031	Gpr183	194	0.0121074	133	0.00771323	170	0.0128176	165.667	0.0108794	1	0.305409	0.188726	0.0349687	-0.028467	24.3491	0.992492	1	9.71539e-06	0	-8.68391e-06	1	3.63191e-05	0.666667	1.24502e-05	1	10.1154	-9.17328	4.80345	N/A	N/A	N/A
ENSMUSG00000026700	tumor necrosis factor (ligand) superfamily, member 4	NM_009452	Tnfsf4	0	-3.21022e-06	0	-1.24592e-05	0	-6.23105e-06	0	-7.30015e-06	1	0.882485	0.0405249	0.0583705	-0.0284134	24.395	0.830888	12	0.00090228	7	0.000672393	6	0.000562234	8.33333	0.000712302	1	0.584924	0.206252	0.166437	-0.0172478	40.1875	0.937854
ENSMUSG00000084911				302	0.0172651	145	0.00762705	406	0.0279668	284.333	0.0176197	1	0.495937	0.0809421	0.0481697	-0.0283515	24.4483	0.948824	159	0.0068065	85	0.00467619	193	0.0103283	145.667	0.00727032	1	0.507633	0.0929493	0.14523	-0.0208685	33.215	0.837628
ENSMUSG00000051431	G protein-coupled receptor 87	NM_032399	Gpr87	0	-6.10968e-05	0	-0.000288188	0	-0.000116819	0	-0.000155368	1	1.22494	0.0880884	0.0371448	-0.0282979	24.4947	0.901584	134	0.0171722	95	0.0155528	66	0.0105407	98.3333	0.0144219	1	0.811909	0.448327	0.105915	-0.0171323	40.4586	0.968547
ENSMUSG00000087700				29	0.00367407	20	0.0023026	29	0.00440706	26	0.00346124	1	0.420308	0.0623825	0.0589377	-0.02816	24.6146	0.910256	32	0.00305289	26	0.00317797	34	0.00404976	30.6667	0.00342688	1	0.365322	0.0831423	0.0881183	-0.024917	27.8183	0.895697
ENSMUSG00000057396	zinc finger protein 759	NM_172392	Zfp759	132	0.00694614	72	0.0034478	130	0.00821454	111.333	0.00620283	1	0.237121	0.13861	0.0457956	-0.0281359	24.6357	0.96624	125	0.00494814	87	0.00441475	130	0.00642671	114	0.0052632	1	0.299716	0.14896	0.130732	-0.0208754	33.204	0.8936
ENSMUSG00000090641		NM_001166218		213	0.00983468	102	0.00430504	162	0.00898423	159	0.00770799	1	0.321967	0.0908545	0.0525188	-0.0281216	24.6482	0.950832	159	0.00551315	97	0.00431548	147	0.00637147	134.333	0.00540004	1	0.626998	0.237974	0.142823	-0.0176549	39.2609	0.971105
ENSMUSG00000095990		NM_011765		85	0.00580429	34	0.00209104	61	0.00496732	60	0.00428755	1	0.183853	0.110127	0.0561475	-0.0279761	24.7764	0.922882	83	0.00426444	59	0.00388644	110	0.00706425	84	0.00507171	1	0.296429	0.244566	0.0907954	-0.0216334	32.0405	0.959606
ENSMUSG00000045664	CDC42 effector protein (Rho GTPase binding) 2	NM_026772	Cdc42ep2	344	0.0423755	368	0.0420819	252	0.0374815	321.333	0.0406463	1	0.318987	0.129877	0.0471869	-0.0276817	25.0399	0.978782	45	0.00404822	26	0.00303706	28	0.00317524	33	0.00342017	1	0.606586	0.329615	0.326162	-0.0114302	60.6419	0.902232
ENSMUSG00000026358	regulator of G-protein signaling 1	NM_015811	Rgs1	10	0.000180543	15	0.000251653	17	0.000370812	14	0.000267669	1	0.0871442	0.244936	0.0500288	-0.0273561	25.338	0.836697	0	-5.56451e-07	0	-2.83322e-07	0	-6.44951e-07	0	-4.94908e-07	1	0.0899536	1.05901	0.0731796	-0.0202431	34.2412	0.612664
ENSMUSG00000051515	family with sequence similarity 181, member B		Fam181b	31	0.00310146	27	0.00250656	19	0.00229658	25.6667	0.00263487	1	0.337332	0.158779	0.0447626	-0.02729	25.3993	0.990059	0	-9.55897e-06	2	0.00018981	0	-3.99442e-06	0.666667	5.87522e-05	1	0.348207	0.722411	0.0654765	-0.0200151	34.6311	0.875303
ENSMUSG00000049107	neurotrophin 3	NM_008742,NM_001164035,NM_001164034	Ntf3	227	0.0151239	172	0.010259	172	0.0136336	190.333	0.0130055	1	0.372671	0.124343	0.0493962	-0.0272826	25.4062	0.979142	492	0.0248001	378	0.0243753	419	0.0263469	429.667	0.0251741	1	0.651998	0.234755	0.147837	-0.017417	39.7971	0.965612
ENSMUSG00000051499	zinc finger protein 786	NM_177882	Zfp786	43	0.0021854	46	0.0021458	63	0.00383809	50.6667	0.00272309	1	0.403742	0.188464	0.0405382	-0.02709	25.5868	0.999076	99	0.00380848	44	0.00216378	102	0.00489209	81.6667	0.00362145	1	0.437249	0.37686	0.107762	-0.0185561	37.3541	0.986044
ENSMUSG00000074676	forkhead box S1	NM_010226	Foxs1	12	0.00168041	16	0.00207998	8	0.00135377	12	0.00170472	1	0.217909	0.0383173	0.106311	-0.0270046	25.6677	0.766348	1	0.000100373	1	0.000132501	0	-2.35461e-06	0.666667	7.68395e-05	1	-0.0116065	-0.00292793	0.155507	N/A	N/A	N/A
ENSMUSG00000058883	zinc finger protein 708	NM_001012449,NM_001012448,NM_001012325	Zfp708	94	0.00231713	43	0.000951491	81	0.00239339	72.6667	0.00188734	1	0.314935	0.206375	0.0420535	-0.0269631	25.7072	0.990907	144	0.00267885	85	0.00202438	112	0.00259937	113.667	0.0024342	1	0.251645	0.109992	0.107069	-0.0233834	29.6427	0.878158
ENSMUSG00000030156	CD69 antigen	NM_001033122	Cd69	9	0.00102189	8	0.000844074	12	0.00164614	9.66667	0.0011707	1	0.290481	0.0765426	0.0708742	-0.0269261	25.7426	0.905161	0	-3.14956e-06	0	-9.50297e-07	0	-2.86312e-06	0	-2.32099e-06	1	0.299845	0.33094	0.103671	-0.0198131	34.9843	0.949886
ENSMUSG00000056014	similar to RIKEN cDNA A430033K04 gene; RIKEN cDNA A430033K04 gene	NM_183025	A430033K04Rik	339	0.0146356	223	0.00884783	308	0.0159753	290	0.0131529	1	0.243823	0.0857179	0.072014	-0.0267433	25.9185	0.904246	299	0.00970573	155	0.00644753	284	0.0115145	246	0.00922258	1	0.270048	0.209331	0.126639	-0.0201627	34.3777	0.911495
ENSMUSG00000067279	protein phosphatase 1, regulatory (inhibitor) subunit 3C	NM_016854	Ppp1r3c	204	0.0137749	105	0.00658196	135	0.0110069	148	0.0104546	1	0.175166	0.134097	0.0630435	-0.0266923	25.9681	0.915369	10	0.000466462	6	0.000382675	11	0.000678513	9	0.000509217	1	-0.0164568	0.84728	-0.0026019	N/A	N/A	N/A
ENSMUSG00000060397	zinc finger protein 128	NM_153802	Zfp128	163	0.00471375	92	0.00244538	141	0.00490842	132	0.00402252	1	0.208082	0.168362	0.0543071	-0.0266437	26.0155	0.949881	114	0.00247451	61	0.00169869	90	0.00244037	88.3333	0.00220452	1	0.287755	0.0699403	0.144474	-0.0227056	30.5276	0.787645
ENSMUSG00000031504	RAB20, member RAS oncogene family	NM_011227	Rab20	20	0.0025216	20	0.00224593	15	0.00222342	18.3333	0.00233032	1	0.604774	0.0931433	0.0570564	-0.0265159	26.1408	0.943255	58	0.00554612	51	0.00623627	60	0.0071563	56.3333	0.0063129	1	0.847438	0.339685	0.133178	-0.0164909	42.032	0.977576
ENSMUSG00000033739	FK506 binding protein-like	NM_019873	Fkbpl	111	0.0133187	100	0.010948	114	0.0164528	108.333	0.0135732	1	0.274058	0.237135	0.0447177	-0.0263527	26.3027	0.979329	168	0.0152116	115	0.0133258	112	0.0126437	131.667	0.0137271	1	0.299468	0.18126	0.142837	-0.0196914	35.2004	0.898367
ENSMUSG00000063060	SRY-box containing gene 7	NM_011446	Sox7	212	0.0118016	359	0.0185712	252	0.0169489	274.333	0.0157739	1	0.842645	0.0664989	0.0674872	-0.025993	26.6666	0.872004	2	4.75298e-05	0	-2.09083e-05	0	-2.9479e-05	0.666667	-9.52499e-07	1	1.39945	-5.26362	-1.67239	N/A	N/A	N/A
ENSMUSG00000065738	ENSMUSG00000065463; ENSMUSG00000065738; ENSMUSG00000064731		Gm24494	70	0.160003	34	0.0701725	74	0.203097	59.3333	0.144424	1	0.298039	0.258471	0.0456334	-0.0258174	26.8481	0.982172	89	0.153335	56	0.123571	82	0.176276	75.6667	0.151061	1	0.341861	0.295963	0.23172	-0.0148528	46.6677	0.873638
ENSMUSG00000075304	trans-acting transcription factor 5	NM_022435	Sp5	382	0.0334077	388	0.0315262	353	0.0372971	374.333	0.034077	1	0.424317	0.0962891	0.074684	-0.0252635	27.4367	0.931944	5	0.000226569	4	0.000301291	2	9.94014e-05	3.66667	0.000209087	1	0.141247	-0.0490442	0.753882	N/A	N/A	N/A
ENSMUSG00000046470	SRY-box containing gene 18	NM_009236	Sox18	237	0.0268765	331	0.0348804	250	0.034251	272.667	0.0320027	1	0.536838	0.103598	0.0680295	-0.0252504	27.4509	0.945004	0	-8.28359e-05	0	-3.92699e-05	1	4.69301e-05	0.333333	-2.50586e-05	1	0.554144	0.447918	2.13997	0.00134372	>Capzb	0.0217038
ENSMUSG00000049950	ribonuclease P/MRP 38 subunit (human)	NM_001013376	Rpp38	262	0.0461076	152	0.0245577	164	0.0346176	192.667	0.0350943	1	0.202212	0.113517	0.083213	-0.0252309	27.4722	0.89315	247	0.0326977	115	0.0195051	185	0.0305931	182.333	0.0275986	1	0.31304	0.326184	0.167428	-0.0167473	41.3885	0.914262
ENSMUSG00000086506				8	0.00181266	8	0.00167203	10	0.00272431	8.66667	0.00206967	1	0.435398	0.0754052	0.0846443	-0.0252039	27.5016	0.891283	14	0.00239617	5	0.00109392	11	0.00234704	10	0.00194571	1	0.333972	0.867191	0.363622	-0.00861627	80.4463	0.624597
ENSMUSG00000080346	ENSMUSG00000080346			3	0.00664092	0	-0.000199586	7	0.0187376	3.33333	0.00839298	1	0.869728	0.0283674	0.119224	-0.0250343	27.6879	0.687298	12	0.0202146	5	0.0107712	8	0.0167792	8.33333	0.0159217	1	0.682189	0.144376	1.00023	-0.00674949	102.696	0.221236
ENSMUSG00000067297	RIKEN cDNA 2010002M12 gene	NM_053217	2010002M12Rik	21	0.000584216	12	0.000308103	21	0.000703748	18	0.000532022	1	0.662437	0.306388	0.0391439	-0.0249836	27.7441	0.977402	22	0.000460721	6	0.0001608	14	0.000365584	14	0.000329035	1	0.798064	1.44403	0.787075	-0.000711782	973.82	0.0393698
ENSMUSG00000051251	nescient helix loop helix 1	NM_010916	Nhlh1	4	0.000298109	2	0.000138508	19	0.00171077	8.33333	0.000715797	1	0.435721	0.300725	0.0441274	-0.0249469	27.7849	0.990727	0	-9.188e-07	0	-1.55938e-07	0	-2.97554e-06	0	-1.35009e-06	1	0.449768	-1327.27	-93.8973	N/A	N/A	N/A
ENSMUSG00000019960	dual specificity phosphatase 6	NM_026268	Dusp6	1857	0.121711	1937	0.11713	2141	0.16915	1978.33	0.135997	1	0.410251	0.129877	0.0691769	-0.0248535	27.8894	0.965232	1614	0.079529	953	0.0601407	1142	0.0701644	1236.33	0.0699447	1	0.375224	0.347976	0.162029	-0.0164625	42.1045	0.95075
ENSMUSG00000042106	RIKEN cDNA 6230427J02 gene	NM_026597	Fam212a	1086	0.12609	875	0.0942957	869	0.121834	943.333	0.114073	1	0.272734	0.128746	0.0773227	-0.0248225	27.9242	0.935922	88	0.00731265	62	0.00682542	75	0.00796791	75	0.00736866	1	0.475043	0.736279	0.20203	-0.0123079	56.3171	0.893128
ENSMUSG00000078994	zinc finger protein 429	NM_001080941		133	0.0119935	82	0.0067794	95	0.0102805	103.333	0.00968446	1	0.477702	0.150656	0.0625326	-0.0247818	27.97	0.982609	140	0.00950379	69	0.00599947	105	0.00889968	104.667	0.00813431	1	0.45945	0.355335	0.219004	-0.0141616	48.9457	0.951929
ENSMUSG00000095193		NM_001024731		57	0.00665975	46	0.00491015	40	0.00563928	47.6667	0.00573639	1	0.39737	0.37747	0.0422657	-0.0246453	28.1249	0.971996	33	0.00288955	44	0.00495131	13	0.00141888	30	0.00308658	1	0.3184	0.605895	0.386317	-0.00944592	73.3806	0.684013
ENSMUSG00000034765	dual specificity phosphatase 5	NM_001085390	Dusp5	26	0.00192863	35	0.00240641	37	0.0033151	32.6667	0.00255005	1	0.770319	0.243593	0.0457421	-0.0244832	28.3112	0.978494	18	0.00100212	8	0.000569647	9	0.00062238	11.6667	0.000731382	1	0.714427	2.8056	0.447329	-0.00236649	292.901	0.0580141
ENSMUSG00000058331	zinc finger protein 85, related sequence 1	NM_001001130	Zfp85-rs1	203	0.00822576	96	0.00357272	136	0.00662377	145	0.00614075	1	0.252534	0.167399	0.0751262	-0.0242941	28.5315	0.946175	120	0.0036448	66	0.00257472	106	0.00402875	97.3333	0.00341609	1	0.479194	0.250828	0.179198	-0.0164741	42.075	0.948182
ENSMUSG00000030157	C-type lectin domain family 2, member d	NM_053109	Clec2d	163	0.0247393	129	0.0181101	107	0.0195882	133	0.0208126	1	0.331173	0.133542	0.0796493	-0.02421	28.6307	0.948733	47	0.00530357	36	0.00524382	30	0.00424543	37.6667	0.00493094	1	0.474799	0.0782763	0.0326199	-0.0310019	22.3582	0.968271
ENSMUSG00000062794	cDNA sequence BC050092	NM_181419	Zfp599	156	0.00796665	84	0.00384146	178	0.0108779	139.333	0.00756199	1	0.272689	0.127664	0.086776	-0.0241172	28.7408	0.923738	388	0.0150076	187	0.00925103	333	0.0160593	302.667	0.0134393	1	0.283418	0.204436	0.11094	-0.0210014	33.0048	0.93198
ENSMUSG00000039182	expressed sequence AW209491	NM_134067,NM_001104646	AW209491	308	0.0142541	178	0.00739278	271	0.0150256	252.333	0.0122242	1	0.450938	0.230851	0.0596047	-0.023823	29.0957	0.999113	456	0.0159227	353	0.0157818	387	0.0168613	398.667	0.0161886	1	0.592968	0.206127	0.175607	-0.0168876	41.0448	0.930436
ENSMUSG00000030507	developing brain homeobox 1	NM_001005232	Dbx1	43	0.0037805	109	0.00890504	57	0.00605452	69.6667	0.00624669	1	0.567451	0.365157	0.0447626	-0.0238206	29.0986	0.976215	0	-1.16518e-05	0	-1.00257e-05	0	-1.05306e-05	0	-1.0736e-05	1	0.585744	1.57879	0.0654765	-0.0167076	41.4869	0.665632
ENSMUSG00000057895	zinc finger protein 105	NM_009544	Zfp105	355	0.0236102	281	0.0172921	344	0.0275558	326.667	0.0228194	1	0.310993	0.14217	0.0842095	-0.0237575	29.1759	0.944662	186	0.00926253	83	0.00530228	179	0.0111483	149.333	0.00857103	1	0.567977	0.250894	0.145147	-0.0175415	39.5146	0.976292
ENSMUSG00000046791	RIKEN cDNA 2410016O06 gene	NM_023633	2410016O06Rik	216	0.0167637	276	0.0195038	236	0.02187	242.667	0.0193792	1	0.446967	0.158515	0.0731205	-0.0237328	29.2063	0.978192	655	0.0385704	404	0.0304104	540	0.0396436	533	0.0362082	1	0.366006	0.22481	0.0572813	-0.0244908	28.3023	0.993001
ENSMUSG00000056592	cDNA sequence BC043301	NM_001008549	Zfp658	360	0.0107195	236	0.0064838	314	0.0112618	303.333	0.00948838	1	0.297552	0.138363	0.0867518	-0.023725	29.2159	0.936644	264	0.00590258	111	0.0031809	182	0.00508	185.667	0.00472116	1	0.261186	0.226771	0.203312	-0.0169559	40.8795	0.83063
ENSMUSG00000050423	protein phosphatase 1, regulatory (inhibitor) subunit 3G	NM_029628	Ppp1r3g	13	0.000889015	16	0.00101351	11	0.000907779	13.3333	0.000936767	1	0.267883	0.191706	0.0774386	-0.0235776	29.3986	0.95443	2	0.000100372	3	0.000196447	2	0.000126923	2.33333	0.000141247	1	0.593339	0.479237	-0.00140909	N/A	N/A	N/A
ENSMUSG00000065191	U1b1 small nuclear RNA; U1b6 small nuclear RNA; U1b2 small nuclear RNA; U1a1 small nuclear RNA		Gm23458	8	0.00862909	12	0.0114969	18	0.0231831	12.6667	0.0144363	1	1.86129	0.0492477	0.0942398	-0.0235685	29.4099	0.698498	37	0.0304263	35	0.0367878	50	0.0512458	40.6667	0.0394866	1	0.726155	0.412576	0.299717	-0.0109688	63.1928	0.972583
ENSMUSG00000094526				162	0.0107638	19	0.00117333	230	0.0184667	137	0.0101346	1	1.25885	0.41897	0.0367942	-0.0233641	29.6672	0.88062	12	0.000567793	0	-1.32099e-06	0	-3.21189e-05	4	0.000178118	1	0.43999	1.81146	-27.1134	N/A	N/A	N/A
ENSMUSG00000043311	DNA segment, Chr 17, human D6S53E	NM_033477	D17H6S53E	178	0.00735787	139	0.00525919	196	0.0097339	171	0.00745032	1	0.548348	0.160985	0.0740482	-0.0232792	29.7754	0.977998	312	0.00974218	142	0.00567162	233	0.00907109	229	0.00816163	1	0.359471	0.197744	0.132911	-0.0195825	35.3962	0.935626
ENSMUSG00000066392	neurexin III	NM_001252074,NM_001198587,NM_172544	Nrxn3	5	2.46198e-05	5	2.289e-05	14	8.33295e-05	8	4.36131e-05	1	0.523146	0.244936	0.0607493	-0.0232784	29.7764	0.999736	1	3.63674e-06	0	-2.57706e-08	0	-1.44934e-07	0.333333	1.15534e-06	1	-0.0112673	1.05901	0.0888609	N/A	N/A	N/A
ENSMUSG00000017144	Rho family GTPase 3	NM_028810	Rnd3	5849	0.16705	3660	0.0964536	4937	0.170045	4815.33	0.144516	1	0.446518	0.175131	0.0753355	-0.0232285	29.8404	0.983216	2204	0.0469693	1528	0.0419468	1616	0.0430933	1782.67	0.0440031	1	0.495058	0.277026	0.160395	-0.0168108	41.2322	0.972655
ENSMUSG00000046550	spindlin family, member 2	NM_001005370	Spin2c	489	0.039559	317	0.0235021	376	0.0365928	394	0.033218	1	0.492797	0.285402	0.0588968	-0.0230845	30.0265	0.997893	412	0.0250519	264	0.0205807	284	0.0215622	320	0.0223983	1	0.573878	0.376247	0.130233	-0.0169271	40.949	0.999306
ENSMUSG00000051279	growth differentiation factor 6	NM_013526	Gdf6	39	0.00202565	46	0.00221814	20	0.00125436	35	0.00183272	1	0.468865	0.146259	0.0842527	-0.0230126	30.1204	0.963372	11	0.000424635	4	0.000197665	3	0.000144267	6	0.000255523	1	0.640361	1.27127	2.02561	0.00453616	>Capzb	0.515423
ENSMUSG00000090628				10	0.00134206	10	0.00123712	12	0.00194324	10.6667	0.00150747	1	0.348191	0.0615526	0.141904	-0.0229224	30.2388	0.782083	6	0.000603656	5	0.000645653	4	0.000501591	5	0.000583634	1	0.390156	0.144114	0.249942	-0.016447	42.1443	0.779245
ENSMUSG00000046185	zinc finger protein 84	NM_023750	Zfp84	742	0.0330498	406	0.0165132	594	0.0317733	580.667	0.0271121	1	0.272702	0.157246	0.0947396	-0.022898	30.271	0.929231	769	0.0257822	424	0.0182134	604	0.0252812	599	0.0230923	1	0.406666	0.318009	0.191907	-0.0155462	44.5863	0.942382
ENSMUSG00000077575	ENSMUSG00000065016; ENSMUSG00000084418; ENSMUSG00000077603; ENSMUSG00000080536; ENSMUSG00000077575; ENSMUSG00000065817		Gm24888	17	0.0241155	13	0.0168526	11	0.0186513	13.6667	0.0198731	1	0.256158	0.239058	0.0780826	-0.0228953	30.2747	0.952136	17	0.0181477	13	0.0177823	17	0.0226766	15.6667	0.0195355	1	0.206205	0.276841	0.0586637	-0.0245893	28.189	0.937849
ENSMUSG00000009633	G0/G1 switch gene 2	NM_008059	G0s2	259	0.0565556	155	0.0313566	183	0.0482287	199	0.0453803	1	0.359884	0.25358	0.0697581	-0.0228841	30.2894	0.988073	33	0.00525784	27	0.00564253	29	0.00586531	29.6667	0.00558856	1	0.500434	0.154563	0.103325	-0.0214382	32.3323	0.952681
ENSMUSG00000018500	adenosine A2b receptor	NM_007413	Adora2b	198	0.0196373	183	0.0164825	193	0.0229109	191.333	0.0196769	1	0.49094	0.149699	0.0840287	-0.0228827	30.2914	0.96584	282	0.0210968	252	0.0241345	293	0.0273558	275.667	0.0241957	1	0.67251	0.286185	0.173898	-0.0157081	44.1266	0.975074
ENSMUSG00000072999	ENSMUSG00000072999		Gm15401	10	0.000759103	12	0.000841955	17	0.0015494	13	0.00105015	1	0.523006	0.10292	0.101086	-0.0227983	30.4035	0.90601	28	0.00161152	8	0.000588109	27	0.00193673	21	0.00137878	1	0.333942	0.180045	0.07387	-0.0237265	29.2141	0.97335
ENSMUSG00000036975	transmembrane protein 177	NM_175106	Tmem177	353	0.0193114	278	0.0138459	322	0.0211309	317.667	0.0180961	1	0.561415	0.215365	0.0688979	-0.0227757	30.4337	0.995622	589	0.0243318	357	0.0188708	432	0.0222582	459.333	0.0218203	1	0.585929	0.288628	0.141077	-0.0172279	40.234	0.990145
ENSMUSG00000058900	regulator of sex limited protein 1	NM_001013769	Rsl1	110	0.0122453	42	0.00428225	66	0.00880432	72.6667	0.00844397	1	0.189202	0.132418	0.116307	-0.0227216	30.506	0.849315	106	0.00887766	37	0.00397073	82	0.00857979	75	0.00714273	1	0.364914	0.31185	0.2437	-0.0142632	48.5968	0.880418
ENSMUSG00000000567	SRY-box containing gene 9	NM_011448	Sox9	25	0.00107086	23	0.000817574	25	0.00124325	24.3333	0.0010439	1	0.297953	0.0468316	0.176473	-0.0226533	30.5981	0.700495	330	0.0110398	166	0.0070956	212	0.00883911	236	0.0089915	1	0.492806	0.474044	0.254368	-0.0121848	56.886	0.957043
ENSMUSG00000094551				35	0.0603437	14	0.021809	31	0.0641284	26.6667	0.0487604	1	0.273077	0.223204	0.082617	-0.0226532	30.5982	0.955404	52	0.067646	23	0.0383038	39	0.0632897	38	0.0564131	1	0.315048	0.407665	0.153694	-0.0165727	41.8245	0.91931
ENSMUSG00000006720	zinc finger protein 184 (Kruppel-like)	NM_183014	Zfp184	587	0.00871584	304	0.00410366	445	0.00793187	445.333	0.00691713	1	0.338826	0.196393	0.0839536	-0.0226151	30.6498	0.970657	612	0.00684021	386	0.00552848	473	0.0066005	490.333	0.00632307	1	0.49565	0.368021	0.283245	-0.0122966	56.3688	0.926928
ENSMUSG00000027317	protein phosphatase 1, regulatory (inhibitor) subunit 14D	NM_028104	Ppp1r14d	0	-4.0788e-06	0	-1.46125e-05	0	-8.52597e-06	0	-9.07243e-06	1	0.814602	0.364724	0.0500318	-0.0225439	30.7465	0.957683	13	0.00114641	7	0.000788604	7	0.000769307	9	0.000901439	1	0.53993	1.85627	0.14266	-0.0113783	60.9183	0.537261
ENSMUSG00000032515	cysteine-serine-rich nuclear protein 1	NM_153287	Csrnp1	151	0.00965183	161	0.0095062	172	0.0132559	161.333	0.0108047	1	0.48992	0.13375	0.0940959	-0.0225251	30.7722	0.945505	90	0.00431239	63	0.00387225	72	0.00430602	75	0.00416355	1	0.585467	0.251185	0.152649	-0.0171697	40.3703	0.972671
ENSMUSG00000029557	FtsJ homolog 2 (E. coli)	NM_026510	Ftsj2	249	0.0316147	204	0.0236477	216	0.0329629	223	0.0294085	1	0.394638	0.17697	0.0869188	-0.0224833	30.8295	0.971841	331	0.0316861	223	0.0273286	218	0.0260302	257.333	0.0283483	1	0.417073	0.203394	0.151222	-0.0184377	37.594	0.935297
ENSMUSG00000030469	zinc finger protein 719	NM_172482	Zfp719	594	0.0215146	279	0.00928967	474	0.02065	449	0.0171514	1	0.214962	0.181598	0.100631	-0.0224356	30.895	0.902039	389	0.0105701	181	0.00631196	340	0.0115499	303.333	0.00947729	1	0.407141	0.258369	0.217568	-0.0154068	44.9896	0.903505
ENSMUSG00000038422	haloacid dehalogenase-like hydrolase domain containing 3	NM_024257	Hdhd3	164	0.01976	114	0.0123125	131	0.0188504	136.333	0.0169743	1	0.396011	0.187314	0.0851397	-0.0224287	30.9044	0.97692	396	0.0361295	247	0.0288235	272	0.0309463	305	0.0319664	1	0.520117	0.379732	0.124829	-0.017323	40.013	0.995958
ENSMUSG00000048528	NK1 transcription factor related, locus 2 (Drosophila)	NM_009123	Nkx1-2	6	0.000337394	7	0.000364771	7	0.000473222	6.66667	0.000391796	1	0.434932	0.0877178	0.121667	-0.0224218	30.914	0.859654	0	-1.03988e-06	1	5.37246e-05	4	0.00021042	1.66667	8.77015e-05	1	-47.2231	-0.00289907	0.249939	N/A	N/A	N/A
ENSMUSG00000021025	nuclear factor of kappa light polypeptide gene enhancer in B-cells inhibitor, alpha	NM_010907	Nfkbia	389	0.0450888	469	0.0491136	355	0.048863	404.333	0.0476885	1	0.631989	0.234208	0.0680554	-0.0223995	30.9447	0.994027	1101	0.0967664	858	0.0964184	1012	0.11092	990.333	0.101368	1	0.788589	0.551666	0.0809026	-0.0182304	38.0214	0.93293
ENSMUSG00000065362	RIKEN cDNA 9430008C03 gene		Gm24411	29	0.040625	26	0.0330179	9	0.0146713	21.3333	0.0294381	1	0.300792	0.168428	0.0967475	-0.0223912	30.9563	0.940869	81	0.0860294	43	0.0583911	46	0.0609497	56.6667	0.0684567	1	0.17311	0.285114	0.130252	-0.0197091	35.169	0.833784
ENSMUSG00000067261	forkhead box D3	NM_010425	Foxd3	118	0.00912292	186	0.0133534	144	0.0134409	149.333	0.0119724	1	0.731123	0.148228	0.0826647	-0.0223858	30.9637	0.951189	24	0.00137093	12	0.00087861	21	0.00150223	19	0.00125059	1	0.481952	0.417339	0.287882	-0.0118388	58.5488	0.930465
ENSMUSG00000044231	NHL repeat containing 1	NM_175340	Nhlrc1	79	0.00626983	97	0.0069731	74	0.00695307	83.3333	0.006732	1	0.682311	0.225881	0.0692206	-0.0222851	31.1037	0.988972	254	0.0153041	170	0.013094	245	0.0184079	223	0.015602	1	0.575547	0.403062	0.17124	-0.0149659	46.3151	0.997222
ENSMUSG00000027202	solute carrier family 12, member 1	NM_001079690,NM_183354	Slc12a1	1	1.14762e-05	0	-1.24165e-06	0	-7.24467e-07	0.333333	3.17001e-06	1	0.861755	0.0709186	0.116741	-0.0222737	31.1196	0.805712	4	3.49328e-05	6	6.70091e-05	6	6.53694e-05	5.33333	5.57704e-05	1	1.17012	0.360941	0.332874	-0.00996973	69.5252	0.826436
ENSMUSG00000074575	potassium voltage-gated channel, subfamily G, member 1	NM_001081134	Kcng1	14	0.00036965	16	0.000388799	16	0.000507846	15.3333	0.000422099	1	0.933027	0.347669	0.0517154	-0.0222704	31.1242	0.947381	19	0.000378292	11	0.000280192	16	0.000397317	15.3333	0.000351934	1	0.738171	0.523479	0.625365	-0.00551711	125.636	0.786492
ENSMUSG00000048455	small proline-rich protein 1B	NM_009265	Sprr1b	0	-5.41283e-06	0	-2.40088e-05	0	-7.00422e-06	0	-1.2142e-05	1	1.96108	0.0472791	0.116741	-0.0222557	31.1447	0.651031	9	0.00152136	6	0.0012957	3	0.000631998	6	0.00114968	1	1.29983	0.240627	0.332874	-0.0110901	62.5017	0.702699
ENSMUSG00000073243	predicted gene 9	NM_001033234	Gm9	0	-2.07581e-06	0	-5.919e-06	0	-3.45356e-06	0	-3.81612e-06	1	0.504277	0.0945582	0.116741	-0.022211	31.2074	0.875936	7	0.000583436	3	0.000319434	3	0.000311618	4.33333	0.000404829	1	0.334242	0.481255	0.332874	-0.0110453	62.7547	0.782729
ENSMUSG00000074824	ENSMUSG00000074824	NM_001256052	Rslcan18	57	0.00350745	24	0.00132422	46	0.003389	42.3333	0.00274022	1	0.33482	0.528213	0.0555875	-0.0221109	31.3487	0.928136	56	0.00259285	47	0.00279012	62	0.00358655	55	0.00298984	1	0.606895	0.260026	0.128934	-0.0180749	38.3487	0.98638
ENSMUSG00000023387	potassium channel, subfamily K, member 16	NM_029006	Kcnk16	0	-3.94023e-06	0	-2.24705e-05	0	-1.74812e-05	0	-1.46306e-05	1	0.756416	0.141837	0.0875557	-0.0221067	31.3546	0.940204	7	0.00110746	6	0.00121268	8	0.00157734	7	0.00129916	1	0.501363	0.721882	0.249656	-0.0109411	63.3526	0.901916
ENSMUSG00000083906	ENSMUSG00000083906			8	0.00260753	6	0.00180867	8	0.00310802	7.33333	0.00250807	1	0.651716	0.101801	0.107939	-0.0220673	31.4106	0.888445	5	0.00122215	2	0.000626588	14	0.0042873	7	0.00204534	1	1.17311	0.7228	-0.000199076	N/A	N/A	N/A
ENSMUSG00000036537	ring finger protein 113A1	NM_153503	Rnf113a1	99	0.014857	90	0.0122783	100	0.0180035	96.3333	0.0150463	1	0.544113	0.180018	0.0851951	-0.0220464	31.4404	0.979759	171	0.0193828	123	0.0178392	135	0.019084	143	0.0187687	1	0.595261	0.310694	0.207259	-0.0145267	47.7156	0.969847
ENSMUSG00000045912	family with sequence similarity 148, member C	NM_198614,NM_001168624	C2cd4c	8	0.000109005	20	0.000252097	18	0.000295713	15.3333	0.000218938	1	0.763924	0.123188	0.0947811	-0.0220351	31.4565	0.916844	24	0.000248096	13	0.000171626	21	0.000270391	19.3333	0.000230037	1	0.389407	0.332848	0.190314	-0.0155232	44.6524	0.938607
ENSMUSG00000058748	cDNA sequence BC003267	NM_145591	Zfp958	299	0.0391534	146	0.0174763	209	0.0328282	218	0.0298193	1	0.264864	0.144382	0.114444	-0.0220156	31.4844	0.897286	256	0.0251997	141	0.0177963	229	0.0281701	208.667	0.023722	1	0.278777	0.245329	0.174448	-0.0175749	39.4397	0.877195
ENSMUSG00000074811	Hermansky-Pudlak syndrome 6	NM_176785	Hps6	76	0.00516361	90	0.00566483	82	0.00670674	82.6667	0.00584506	1	0.297873	0.115743	0.124802	-0.0219809	31.5341	0.874066	59	0.00301121	24	0.0015667	54	0.00344116	45.6667	0.00267302	1	0.277431	0.511379	0.18494	-0.0148799	46.5827	0.846734
ENSMUSG00000029228	ligand of numb-protein X 1	NM_001159579,NM_001159578,NM_010727,NM_001159580,NM_001159577	Lnx1	20	0.000166166	12	8.78681e-05	12	0.000117507	14.6667	0.000123847	1	0.209847	0.0460386	0.216083	-0.0219782	31.5379	0.640174	60	0.000378196	37	0.000298245	45	0.000353767	47.3333	0.000343403	1	0.80018	0.663507	0.310683	-0.00907823	76.3527	0.983046
ENSMUSG00000036430	tubulin-specific chaperone C	NM_178385	Tbcc	453	0.0450342	340	0.0309689	326	0.0389368	373	0.0383133	1	0.402885	0.196674	0.0889666	-0.0219675	31.5534	0.978078	338	0.0252337	283	0.0271042	286	0.0266879	302.333	0.0263419	1	0.631092	0.310508	0.153695	-0.0163342	42.4354	0.991269
ENSMUSG00000066042	mediator of RNA polymerase II transcription, subunit 18 homolog (yeast)	NM_026039	Med18	143	0.0113544	131	0.00942452	159	0.0151403	144.333	0.0119731	1	0.438078	0.118607	0.1128	-0.021933	31.6029	0.91028	343	0.0206216	213	0.0163766	254	0.0190371	270	0.0186784	1	0.361371	0.318452	0.224184	-0.0147422	47.018	0.896596
ENSMUSG00000023892	hypothetical protein LOC100044272; zinc finger protein 51	NM_009558	Zfp51	478	0.0337127	193	0.012271	280	0.0236735	317	0.0232191	1	0.183181	0.208425	0.106827	-0.0218727	31.6901	0.874298	451	0.0239273	325	0.0221092	334	0.0221381	370	0.0227249	1	0.371715	0.215026	0.161465	-0.0180277	38.4489	0.921363
ENSMUSG00000092118		NM_001115087		130	0.0140759	139	0.0138222	147	0.0191331	138.667	0.0156771	1	0.528861	0.146858	0.0984816	-0.0218177	31.77	0.951196	132	0.0107566	104	0.0108548	132	0.0134261	122.667	0.0116792	1	0.522791	0.221526	0.234752	-0.0150157	46.1614	0.889167
ENSMUSG00000010045	transmembrane protein 115	NM_019704	Tmem115	574	0.0482057	667	0.051332	550	0.0553292	597	0.0516223	1	0.666683	0.250418	0.0715119	-0.0217877	31.8137	0.992464	963	0.0610729	635	0.051514	829	0.0655839	809	0.0593903	1	0.636423	0.309487	0.120486	-0.0178769	38.7733	0.997027
ENSMUSG00000077737	ENSMUSG00000077737			16	0.0365128	8	0.016232	11	0.029359	11.6667	0.0273679	1	0.273107	0.0793288	0.15969	-0.0217528	31.8647	0.779573	30	0.0517398	20	0.0441426	47	0.101188	32.3333	0.06569	1	0.0775458	0.108186	0.0636568	-0.0286059	24.2309	0.81103
ENSMUSG00000088219				11	0.0219065	11	0.020066	18	0.0429363	13.3333	0.0283029	1	0.870564	0.507241	0.0473905	-0.0217357	31.8898	0.91315	6	0.00895027	9	0.0172578	21	0.0392595	12	0.0218225	1	0.975442	0.55933	0.0951569	-0.0168187	41.2128	0.910592
ENSMUSG00000005836	GATA binding protein 6	NM_010258	Gata6	150	0.00863338	204	0.0108985	71	0.0049356	141.667	0.00815582	1	0.406323	0.144083	0.107704	-0.0217283	31.9007	0.936299	17	0.000710962	15	0.000819124	5	0.000261766	12.3333	0.000597284	1	1.05515	0.723366	0.819939	-0.00220333	314.59	0.623469
ENSMUSG00000093738				41	0.00435355	54	0.00532822	36	0.00461834	43.6667	0.0047667	1	0.36133	0.204114	0.0944989	-0.0216393	32.0318	0.969656	0	-1.3418e-05	0	-5.99875e-06	0	-8.03264e-06	0	-9.14981e-06	1	0.372978	0.882506	0.138228	-0.0145264	47.7165	0.813232
ENSMUSG00000035235	tripartite motif-containing 13; predicted gene 9359	NM_023233,NM_001164220	Trim13	414	0.0236108	253	0.0132833	319	0.021905	328.667	0.0195997	1	0.331607	0.194981	0.0989283	-0.0216301	32.0455	0.956701	255	0.0109047	144	0.00790431	187	0.00999431	195.333	0.0096011	1	0.61194	0.36003	0.122743	-0.0173411	39.9713	0.999739
ENSMUSG00000049119	family with sequence similarity 110, member B	NM_173426	Fam110b	656	0.00783092	743	0.00820364	556	0.0080017	651.667	0.00801209	1	0.681162	0.219419	0.0781052	-0.0216132	32.0706	0.986563	314	0.00280419	229	0.00262586	220	0.00245567	254.333	0.00262858	1	0.613964	0.237083	0.145431	-0.0175853	39.4164	0.969736
ENSMUSG00000050428	F-box protein 46	NM_175530	Fbxo46	161	0.00537848	205	0.00628278	187	0.0074901	184.333	0.00638379	1	0.463693	0.123943	0.114651	-0.0215998	32.0905	0.914607	399	0.0100954	206	0.00666239	308	0.00971479	304.333	0.00882419	1	0.486714	0.241484	0.136135	-0.018315	37.846	0.973239
ENSMUSG00000039634	zinc finger protein 189	NM_145547	Zfp189	500	0.0158197	232	0.00676451	336	0.0128023	356	0.0117955	1	0.287273	0.13003	0.126613	-0.0215775	32.1237	0.880989	203	0.00479664	113	0.00343805	168	0.00497514	161.333	0.00440328	1	0.375373	0.280465	0.327568	-0.0126773	54.6763	0.794761
ENSMUSG00000062040	zinc finger protein 27	NM_011754,NM_001037707	Zfp27	520	0.00582862	364	0.00373934	462	0.0062324	448.667	0.00526678	1	0.441257	0.225917	0.0864661	-0.021564	32.1437	0.990269	435	0.00366468	302	0.00326196	326	0.00342862	354.333	0.00345176	1	0.638253	0.453491	0.273095	-0.011464	60.4629	0.988976
ENSMUSG00000089726				167	0.0075203	57	0.00232375	184	0.00990372	136	0.00658259	1	0.483719	0.449445	0.0601979	-0.0215337	32.189	0.966914	162	0.00548868	84	0.00364848	283	0.0119825	176.333	0.00703989	1	0.723065	0.669409	0.148293	-0.0139067	49.8426	0.935109
ENSMUSG00000065501	ENSMUSG00000065501		Mir335	2	0.00378322	3	0.00527329	15	0.0342805	6.66667	0.0144457	1	3.05005	0.204114	0.0566993	-0.0214968	32.2442	0.727486	0	-1.16602e-05	0	-5.93691e-06	0	-5.96237e-05	0	-2.57403e-05	1	3.14838	0.882506	0.0829369	-0.0143838	48.1894	0.519333
ENSMUSG00000022026	olfactomedin 4	NM_001030294	Olfm4	6	0.000636209	6	0.000482148	11	0.00138683	7.66667	0.000835062	1	0.0837015	1.64662	0.0498768	-0.0213902	32.4048	0.561865	126	0.010667	72	0.00778778	91	0.00960031	96.3333	0.00935169	1	0.780021	1.31302	1.24035	0.00183781	>Capzb	0.350204
ENSMUSG00000037944	chemokine (C-C motif) receptor 7	NM_007719	Ccr7	18	0.00167178	14	0.00120531	17	0.00190813	16.3333	0.00159508	1	0.968295	0.482253	0.0500288	-0.0213832	32.4155	0.9093	2	0.000134871	2	0.000177523	0	-3.3188e-06	1.33333	0.000103025	1	0.569081	0.347763	0.0731796	-0.0208501	33.2443	0.993413
ENSMUSG00000036915	kin of IRRE like 2 (Drosophila)	NM_172898	Kirrel2	3	5.41364e-05	12	0.000201223	14	0.000305225	9.66667	0.000186861	1	0.869865	0.356518	0.0607493	-0.0212796	32.5733	0.958513	0	-1.66853e-07	0	-2.26546e-07	0	-5.30875e-07	0	-3.08091e-07	1	-94.4461	-164.53	0.0888609	N/A	N/A	N/A
ENSMUSG00000075271	tetratricopeptide repeat domain 30A1	NM_030188	Ttc30a1	329	0.021024	157	0.00903159	256	0.0195761	247.333	0.0165439	1	0.385244	0.312991	0.0802417	-0.0212189	32.6666	0.986816	442	0.0212972	284	0.0175245	389	0.0233959	371.667	0.0207392	1	0.527086	0.306957	0.118091	-0.0183296	37.8156	0.997048
ENSMUSG00000041748	ENSMUSG00000041748		Ackr4	0	-1.27783e-06	0	-3.64364e-06	0	-5.66921e-06	0	-3.53023e-06	1	0.756416	0.189116	0.0875557	-0.0211934	32.7057	0.966542	7	0.000359154	3	0.000196639	8	0.000511539	6	0.000355777	1	0.501363	0.96251	0.249656	-0.0100278	69.1223	0.790645
ENSMUSG00000032475	non-catalytic region of tyrosine kinase adaptor protein 1	NM_010878	Nck1	1572	0.048797	1065	0.030381	1137	0.0424782	1258	0.0405521	1	0.50821	0.256006	0.0832111	-0.0211864	32.7165	0.998448	994	0.0231411	705	0.0210696	726	0.0211268	808.333	0.0217792	1	0.60545	0.322296	0.143129	-0.0167339	41.4217	0.996132
ENSMUSG00000021453	growth arrest and DNA-damage-inducible 45 gamma	NM_011817	Gadd45g	524	0.049783	718	0.0628483	459	0.0523956	567	0.0550089	1	0.373352	0.150887	0.117237	-0.0211776	32.7302	0.927179	437	0.0312037	401	0.036688	411	0.0366624	416.333	0.0348514	1	0.495782	0.393748	0.148158	-0.0161962	42.7968	0.990158
ENSMUSG00000038797	zinc finger and SCAN domain containing 2	NM_009553	Zscan2	163	0.00542428	188	0.00577429	198	0.007903	183	0.00636719	1	0.261337	0.11469	0.147236	-0.021168	32.745	0.833522	218	0.0054699	101	0.00324086	248	0.00776487	189	0.00549187	1	0.289838	0.242503	0.104499	-0.0208035	33.3188	0.946497
ENSMUSG00000042821	snail homolog 1 (Drosophila)	NM_011427	Snai1	230	0.0260812	250	0.0263366	229	0.0313727	236.333	0.0279302	1	0.424256	0.149272	0.115075	-0.0211271	32.8084	0.934469	5	0.000346911	4	0.000407045	2	0.000158439	3.66667	0.000304132	1	1.62762	3.24448	3.29843	0.012087	>Capzb	0.906259
ENSMUSG00000048387	odd-skipped related 1 (Drosophila)	NM_011859	Osr1	1746	0.159622	2639	0.224181	1870	0.206544	2085	0.196783	1	0.650836	0.187491	0.0923244	-0.0211227	32.8152	0.973421	10	0.000196982	8	0.000451717	4	-1.58004e-05	7.33333	0.000210966	1	-0.0412638	0.109679	-7.78278	N/A	N/A	N/A
ENSMUSG00000050973	RIKEN cDNA D330012F22 gene	NM_178752	Gdpgp1	80	0.00466837	89	0.00473418	78	0.00543766	82.3333	0.00494674	1	0.270364	0.104748	0.154259	-0.0211061	32.841	0.817822	136	0.00599363	109	0.00614615	142	0.00780832	129	0.00664937	1	0.464941	0.198463	0.147591	-0.0184975	37.4726	0.942336
ENSMUSG00000052302	TBC1 domain family, member 30	NM_029057	Tbc1d30	18	0.000574209	24	0.000686556	28	0.00107415	23.3333	0.000778305	1	1.35725	0.316572	0.0594021	-0.0210931	32.8613	0.895713	85	0.00206782	59	0.0018344	56	0.00169737	66.6667	0.00186653	1	0.811503	0.489043	0.392656	-0.00853772	81.1865	0.96396
ENSMUSG00000032501	tribbles homolog 1 (Drosophila)	NM_144549	Trib1	158	0.00419872	222	0.00541179	230	0.00733291	203.333	0.0056478	1	0.462871	0.221042	0.0932747	-0.0210761	32.8878	0.987808	407	0.0081943	227	0.00584167	369	0.00926048	334.333	0.00776548	1	0.347585	0.310979	0.0946638	-0.0203532	34.056	0.973988
ENSMUSG00000075273	tetratricopeptide repeat domain 30B	NM_028235	Ttc30b	570	0.040131	332	0.0213156	448	0.0379077	450	0.0331181	1	0.506725	0.301897	0.0780523	-0.021074	32.8911	0.999145	583	0.0308933	369	0.0250554	414	0.0273835	455.333	0.0277774	1	0.541854	0.355142	0.144803	-0.0165282	41.9373	0.996494
ENSMUSG00000065147	ENSMUSG00000064652; ENSMUSG00000065147		Snora31	19	0.0268954	12	0.0154294	19	0.0323397	16.6667	0.0248882	1	0.274517	0.310765	0.0897446	-0.0210688	32.8993	0.948085	34	0.0363611	17	0.0232612	21	0.0279961	24	0.0292061	1	0.275238	0.72142	0.190334	-0.0136176	50.9009	0.774844
ENSMUSG00000034538	zinc finger protein 418	NM_146179	Zfp418	78	0.00524064	48	0.00297048	62	0.00498377	62.6667	0.0043983	1	0.212076	0.153628	0.137699	-0.0209968	33.012	0.846356	106	0.00537044	31	0.00200913	96	0.00607103	77.6667	0.00448353	1	0.176452	0.558703	0.280979	-0.0126617	54.7435	0.610936
ENSMUSG00000095134				4	0.000556078	11	0.00152438	22	0.00386216	12.3333	0.00198087	1	4.93528	0.392971	0.0392236	-0.0209929	33.0182	0.598856	140	0.0161841	16	0.00236141	135	0.0194443	97	0.0126632	1	0.72651	1.39843	0.0813784	-0.0153704	45.0961	0.686116
ENSMUSG00000050271	DNA segment, Chr 8, ERATO Doi 82, expressed	NM_172911	D8Ertd82e	177	0.00243327	336	0.00403608	225	0.00360633	246	0.00335856	1	0.745909	0.173521	0.0947111	-0.0209901	33.0226	0.956183	3339	0.0364266	1877	0.0261602	2188	0.0297474	2468	0.0307781	1	0.655494	0.34568	0.134185	-0.0167952	41.2705	0.998191
ENSMUSG00000039081	zinc finger protein 503	NM_145459	Zfp503	654	0.0282016	828	0.0322476	633	0.0324587	705	0.0309693	1	0.509231	0.143029	0.115649	-0.0209414	33.0994	0.932244	2584	0.0847817	1654	0.0693624	1923	0.0786547	2053.67	0.0775996	1	0.490265	0.295743	0.172413	-0.01616	42.8928	0.971134
ENSMUSG00000023391	distal-less homeobox 2	NM_010054	Dlx2	17	0.00100722	34	0.00186897	32	0.00229102	27.6667	0.00172241	1	0.511867	0.108125	0.133032	-0.0209322	33.1139	0.874861	8	0.000354536	5	0.00028345	4	0.000218869	5.66667	0.000285618	1	0.732926	0.432876	-0.00354279	N/A	N/A	N/A
ENSMUSG00000036822	topoisomerase I binding, arginine/serine-rich	NM_134097	Topors	1937	0.0919432	1431	0.0620274	1660	0.0946026	1676	0.0828578	1	0.422976	0.210226	0.100249	-0.0209206	33.1323	0.977421	2349	0.0840153	1527	0.0699366	1825	0.0814566	1900.33	0.0784695	1	0.540198	0.401328	0.182836	-0.0146642	47.2681	0.991292
ENSMUSG00000015437	granzyme B	NM_013542	Gzmb	11	0.00142807	11	0.00132502	14	0.00219641	12	0.00164983	1	0.554689	0.501882	0.0607493	-0.0209081	33.152	0.953156	1	9.34562e-05	1	0.000123521	0	-3.8202e-06	0.666667	7.10525e-05	1	-0.0269659	-0.0262064	0.0888609	N/A	N/A	N/A
ENSMUSG00000009248	achaete-scute complex homolog 2 (Drosophila)	NM_008554	Ascl2	7	0.000399082	4	0.000205263	9	0.000618961	6.66667	0.000407769	1	0.245491	0.311883	0.0945256	-0.0209052	33.1567	0.928649	6	0.000257143	7	0.000384853	4	0.000213587	5.66667	0.000285195	1	1.17422	0.721508	0.25022	-0.00957759	72.3718	0.845
ENSMUSG00000060301	RIKEN cDNA 2610008E11 gene	NM_001004362	2610008E11Rik	2334	0.101257	1133	0.0452262	2042	0.106667	1836.33	0.0843834	1	0.365225	0.203259	0.107275	-0.0208306	33.2755	0.960689	1317	0.0428102	669	0.0279326	1161	0.0471896	1049	0.0393108	1	0.374831	0.284868	0.169499	-0.0168133	41.2261	0.938966
ENSMUSG00000067199	ENSMUSG00000067199		Frat1	9	0.00285945	6	0.00175598	8	0.0030537	7.66667	0.00255637	1	0.0953347	0.410809	0.106243	-0.02079	33.3404	0.720228	3	0.00071011	3	0.000916447	6	0.00178659	4	0.00113772	1	1.18314	0.71961	0.333405	-0.0077516	89.4199	0.845589
ENSMUSG00000075502	predicted gene 5465	NM_001034882	Zbtbd6	35	0.00214161	38	0.00210869	30	0.00218416	34.3333	0.00214482	1	0.542717	0.278887	0.0837883	-0.0207665	33.3781	0.999846	77	0.00356502	59	0.00349376	73	0.00421608	69.6667	0.00375829	1	0.927436	0.574632	0.410656	-0.00752917	92.0616	0.969851
ENSMUSG00000059479	UDP-GlcNAc:betaGal beta-1,3-N-acetylglucosaminyltransferase 8	NM_001036740,NM_146184	B3gnt8	46	0.00568964	53	0.00596821	44	0.00647531	47.6667	0.00604438	1	0.737863	0.282547	0.0775239	-0.0207309	33.4354	0.987081	121	0.0113409	75	0.00898735	113	0.0132082	103	0.0111788	1	0.579806	0.451806	0.194493	-0.0137833	50.2888	0.994835
ENSMUSG00000039164	nuclear apoptosis inducing factor 1	NM_194335	Naif1	119	0.00467303	134	0.00482821	140	0.00659412	131	0.00536512	1	0.709287	0.240143	0.0849847	-0.0207265	33.4426	0.986466	233	0.00691709	124	0.00470709	202	0.00747754	186.333	0.00636724	1	0.602223	0.500041	0.257277	-0.0116249	59.6263	0.98973
ENSMUSG00000093734				13	0.0093581	9	0.00593835	20	0.0172521	14	0.0108495	1	0.536333	0.275337	0.0858972	-0.0206682	33.537	0.999612	17	0.00922564	8	0.00555689	27	0.0182876	17.3333	0.0110234	1	0.343416	0.450288	0.0368409	-0.0251891	27.5177	0.945991
ENSMUSG00000045248	mediator complex subunit 26	NM_027485	Med26	281	0.0168578	283	0.0154387	211	0.015106	258.333	0.0158008	1	0.377791	0.143045	0.130094	-0.0206676	33.5378	0.908264	737	0.0335032	417	0.0242369	470	0.0266418	541.333	0.0281273	1	0.595556	0.295793	0.206116	-0.014717	47.0984	0.963964
ENSMUSG00000050213	Smad nuclear interacting protein 1	NM_175246	Snip1	650	0.040004	566	0.0317382	678	0.0501261	631.333	0.0406228	1	0.574186	0.226847	0.0931666	-0.0206591	33.5517	0.9908	923	0.0428484	685	0.0407053	746	0.0431962	784.667	0.04225	1	0.548672	0.281818	0.16337	-0.0164765	42.0688	0.977923
ENSMUSG00000038151	PR domain containing 1, with ZNF domain	NM_007548	Prdm1	248	0.00449759	237	0.00399419	249	0.00545563	244.667	0.00464914	1	0.351369	0.0904186	0.167365	-0.0206394	33.5836	0.799894	5	5.44749e-05	0	-4.49684e-06	2	2.45768e-05	2.33333	2.48516e-05	1	0.494716	-2.41196	0.597578	N/A	N/A	N/A
ENSMUSG00000071281	zinc finger protein 71, releated sequence	NM_145622	Zfp71-rs1	323	0.00664977	194	0.00362218	308	0.0075981	275	0.00595668	1	0.535759	0.167568	0.111019	-0.0206175	33.6194	0.955067	588	0.00914676	291	0.00579176	466	0.00904099	448.333	0.00799317	1	0.50922	0.245252	0.192914	-0.0159807	43.3739	0.93933
ENSMUSG00000028389	zinc finger protein 37	NM_009554	Zfp37	546	0.0230751	263	0.0101972	393	0.0199634	400.667	0.0177452	1	0.335744	0.202353	0.114752	-0.0205505	33.729	0.946723	405	0.0128531	201	0.00818269	324	0.0128506	310	0.0112955	1	0.564456	0.293686	0.305509	-0.0123262	56.2338	0.887832
ENSMUSG00000053600	zinc finger protein 472	NM_153063	Zfp472	428	0.0330198	203	0.0142746	273	0.0252658	301.333	0.0241867	1	0.330749	0.287808	0.0966532	-0.0205457	33.7368	0.968806	425	0.0246731	230	0.0171121	308	0.0223317	321	0.0213723	1	0.501625	0.466926	0.25312	-0.0122359	56.6485	0.961311
ENSMUSG00000020941	RIKEN cDNA 1700028N14 gene; mitogen-activated protein kinase kinase kinase 14	NM_016896	Map3k14	217	0.00458586	191	0.00370222	193	0.00487221	200.333	0.00438676	1	0.281319	0.136233	0.14664	-0.0205304	33.762	0.859582	405	0.00646815	178	0.00363544	363	0.00723225	315.333	0.00577862	1	0.15858	0.242935	0.203565	-0.0175214	39.56	0.731971
ENSMUSG00000035759	Bardet-Biedl syndrome 10 (human)	NM_027914	Bbs10	140	0.00931537	95	0.00579159	126	0.0100811	120.333	0.00839602	1	0.491465	0.168745	0.115112	-0.0205024	33.8082	0.952088	125	0.00625413	81	0.00519454	104	0.00649698	103.333	0.00598188	1	0.401944	0.498791	0.18248	-0.0144556	47.9501	0.938479
ENSMUSG00000046909	RIKEN cDNA 1110002N22 gene	NM_183275	Tefm	319	0.0194332	212	0.0117905	247	0.0180446	259.333	0.0164228	1	0.424932	0.258585	0.0967545	-0.0204813	33.843	0.988962	354	0.01624	226	0.0132806	297	0.0170114	292.333	0.0155107	1	0.555609	0.219501	0.181643	-0.0165767	41.8145	0.935039
ENSMUSG00000065746	U1b1 small nuclear RNA; U1b6 small nuclear RNA; U1b2 small nuclear RNA; U1a1 small nuclear RNA		Gm25005	5	0.00581734	6	0.00605106	12	0.0167681	7.66667	0.00954549	1	1.03799	0.325536	0.0691952	-0.0204612	33.8761	0.942639	32	0.0285287	26	0.0296237	32	0.0355469	30	0.0312331	1	0.987	0.471786	0.405944	-0.00812968	85.2613	0.906951
ENSMUSG00000044519	zinc finger protein 488	NM_001013777	Zfp488	10	0.000426697	12	0.000475172	12	0.000618787	11.3333	0.000506885	1	0.784508	0.357771	0.0708742	-0.0204537	33.8886	0.973607	1	3.08488e-05	1	4.05545e-05	0	-1.07625e-06	0.666667	2.34424e-05	1	-0.0345226	-0.0204052	0.103671	N/A	N/A	N/A
ENSMUSG00000053101	G protein-coupled receptor 141	NM_181754	Gpr141	11	0.000588783	11	0.000547122	7	0.000452673	9.66667	0.000529526	1	0.237236	0.222669	0.121499	-0.0204353	33.9191	0.900055	0	-1.81468e-06	0	-6.15974e-07	0	-7.8733e-07	0	-1.07266e-06	1	-25.758	0.962733	0.177722	N/A	N/A	N/A
ENSMUSG00000078151	oxidative stress responsive 1 pseudogene			363	0.0759958	11	0.00206865	256	0.0644754	210	0.0475133	1	0.409439	0.516561	0.0696466	-0.0204308	33.9266	0.946812	222	0.0348476	20	0.00403524	175	0.0343521	139	0.0244116	1	0.708026	0.359862	0.257297	-0.0124118	55.8457	0.96839
ENSMUSG00000085174				10	0.000926232	15	0.00126721	7	0.000779407	10.6667	0.000990951	1	0.260831	0.209005	0.122729	-0.0204219	33.9414	0.910496	32	0.00225006	21	0.00188733	11	0.000963784	21.3333	0.00170039	1	0.219282	0.136923	0.09066	-0.0239629	28.9258	0.902964
ENSMUSG00000046516	cytochrome c oxidase, subunit XVII assembly protein homolog (yeast)	NM_001017429	Cox17	100	0.00239785	69	0.00149187	130	0.00373127	99.6667	0.00254033	1	0.181683	0.200972	0.138596	-0.0203483	34.0641	0.833511	176	0.00318799	123	0.00285115	210	0.00474502	169.667	0.00359472	1	0.306028	0.169789	0.147342	-0.0196674	35.2434	0.890079
ENSMUSG00000067370	UDP-Gal:betaGlcNAc beta 1,3-galactosyltransferase, polypeptide 4	NM_019420	B3galt4	43	0.00499983	26	0.00273118	30	0.00416814	33	0.00396638	1	0.220961	0.48282	0.0852951	-0.0203374	34.0824	0.881387	41	0.00358636	41	0.00459819	47	0.0051383	43	0.00444095	1	0.658092	0.474309	0.191321	-0.0135324	51.2213	0.998439
ENSMUSG00000054364	ras homolog gene family, member B	NM_007483	Rhob	2620	0.216205	2647	0.202415	2305	0.229557	2524	0.216059	1	0.600761	0.200735	0.10334	-0.0203175	34.1158	0.976483	665	0.0407159	475	0.0375334	470	0.0360503	536.667	0.0380999	1	0.660332	0.428962	0.251823	-0.0121014	57.2781	0.991928
ENSMUSG00000051379	fibronectin leucine rich transmembrane protein 3; similar to fibronectin leucine rich transmembrane protein 3	NM_001172160,NM_178382	Flrt3	4762	0.108496	2662	0.0557194	3614	0.09921	3679.33	0.0878084	1	0.413471	0.249793	0.101788	-0.0203125	34.1242	0.984023	2958	0.0505376	1801	0.0395063	1835	0.039157	2198	0.043067	1	0.609056	0.376461	0.209243	-0.0138203	50.1544	0.989776
ENSMUSG00000036114	RIKEN cDNA 2810432D09 gene	NM_027278	Rpp25l	576	0.123361	565	0.111063	547	0.140892	562.667	0.125105	1	0.463616	0.252389	0.0984229	-0.0203114	34.126	0.991793	687	0.110853	454	0.0937815	491	0.0988296	544	0.101155	1	0.48362	0.254885	0.107706	-0.0196409	35.291	0.990371
ENSMUSG00000084781				3	0.000458738	9	0.00128283	6	0.00110538	6	0.000948983	1	1.46948	0.0686234	0.142283	-0.0202748	34.1877	0.698154	13	0.00151422	4	0.000594318	10	0.00145104	9	0.00118653	1	-0.00141632	-0.000721018	0.299711	N/A	N/A	N/A
ENSMUSG00000064612	ENSMUSG00000064612		Gm26457	7	0.0166422	9	0.0194613	8	0.0227341	8	0.0196125	1	0.496404	0.209018	0.106939	-0.0202746	34.1879	0.978688	6	0.0107232	11	0.0252129	12	0.0268157	9.66667	0.0209173	1	0.781173	-0.00078534	0.166454	N/A	N/A	N/A
ENSMUSG00000028195	cysteine rich protein 61	NM_010516	Cyr61	954	0.0864931	1501	0.12636	783	0.085686	1079.33	0.0995132	1	0.812012	0.185551	0.100916	-0.0202396	34.2471	0.951059	143	0.00950752	91	0.00780364	122	0.0102431	118.667	0.00918474	1	0.624074	1.25353	0.504433	-0.00437593	158.4	0.487982
ENSMUSG00000048482	brain derived neurotrophic factor	NM_001048141,NM_001048139,NM_001048142,NM_007540	Bdnf	245	0.00103804	167	0.000657114	228	0.00116705	213.333	0.000954067	1	0.561802	0.194421	0.108166	-0.0202356	34.2539	0.972108	10	2.87329e-05	6	2.37362e-05	4	1.38883e-05	6.66667	2.21191e-05	1	1.62556	0.345992	0.549169	-0.00640353	108.245	0.450132
ENSMUSG00000024176	SRY-box containing gene 8	NM_011447	Sox8	262	0.0108961	238	0.00919758	260	0.0130632	253.333	0.0110523	1	0.465548	0.16193	0.124237	-0.0202349	34.255	0.938168	0	-3.35826e-05	0	-1.03551e-05	1	1.63366e-05	0.333333	-9.20034e-06	1	-6.0698	-38.3755	14.0724	N/A	N/A	N/A
ENSMUSG00000019773	F-box protein 5	NM_025995	Fbxo5	1079	0.0846941	923	0.0659174	1011	0.0952563	1004.33	0.0819559	1	0.448079	0.236453	0.104695	-0.0201803	34.3476	0.984698	1482	0.0877254	1177	0.0891956	1187	0.0876598	1282	0.0881936	1	0.471278	0.318344	0.191048	-0.0153372	45.1937	0.963162
ENSMUSG00000088929				101	0.263873	33	0.0760313	60	0.186683	64.6667	0.175529	1	0.395949	0.370719	0.0862583	-0.0201789	34.35	0.980675	124	0.244127	93	0.234598	122	0.300007	113	0.259577	1	0.452989	0.178011	0.0490297	-0.025881	26.7821	0.996979
ENSMUSG00000074170	predicted gene 7084; pleckstrin homology domain containing, family F (with FYVE domain) member 1	NM_024413	Plekhf1	94	0.0110684	96	0.0104749	69	0.00980313	86.3333	0.0104488	1	0.324288	0.166271	0.135742	-0.0201625	34.378	0.906583	29	0.0025413	18	0.00203033	17	0.00186443	21.3333	0.00214535	1	0.363434	0.23785	0.176025	-0.0171951	40.3108	0.915419
ENSMUSG00000065591	U6 small nuclear RNA		Gm22753	14	0.0241783	6	0.00946584	15	0.0311537	11.6667	0.0215993	1	0.436047	0.20487	0.113578	-0.0201616	34.3795	0.96831	12	0.015579	6	0.00998803	12	0.0194539	10	0.015007	1	0.193753	0.842152	0.249891	-0.0119551	57.9794	0.581417
ENSMUSG00000034639	SET domain and mariner transposase fusion gene	NM_178391	Setmar	113	0.00900617	87	0.00633221	88	0.00840979	96	0.00791605	1	0.329853	0.198916	0.125139	-0.0200828	34.5145	0.934458	150	0.00901362	94	0.0072311	113	0.00847374	119	0.00823949	1	0.546558	0.560317	0.486583	-0.00737144	94.0314	0.842219
ENSMUSG00000053263	ENSMUSG00000053263		Gm12592	8	0.000492753	11	0.000606514	12	0.000879143	10.3333	0.00065947	1	0.866864	0.403267	0.069297	-0.0200581	34.557	0.954003	27	0.00126317	26	0.00155512	34	0.0019832	29	0.0016005	1	0.909894	0.526997	0.382046	-0.0082927	83.5852	0.96628
ENSMUSG00000055102	zinc finger protein 819	NM_028913	Zfp819	9	0.000240863	4	9.9057e-05	9	0.000290616	7.33333	0.000210179	1	0.193769	0.460786	0.0943443	-0.0200539	34.5642	0.857208	2	3.96175e-05	1	2.56683e-05	2	4.97926e-05	1.66667	3.83595e-05	1	-0.00374794	0.716365	0.502984	N/A	N/A	N/A
ENSMUSG00000065013	ENSMUSG00000064496; ENSMUSG00000065757; ENSMUSG00000065749; ENSMUSG00000064621; ENSMUSG00000064487; ENSMUSG00000064417; ENSMUSG00000084549; ENSMUSG00000084487; ENSMUSG00000064720; ENSMUSG00000084459; ENSMUSG00000064545; ENSMUSG00000064726; ENSMUSG00000064679; ENSMUSG00000084691; ENSMUSG00000084604; ENSMUSG00000064452; ENSMUSG00000065013; ENSMUSG00000065022		Gm23508	19	0.049095	20	0.048029	23	0.0718119	20.6667	0.056312	1	0.458469	0.122468	0.147911	-0.0200385	34.5908	0.875306	1	0.00179619	0	-5.40733e-05	0	-0.000124902	0.333333	0.000539071	1	1.22852	0.529503	0.216357	-0.0114113	60.7422	0.882106
ENSMUSG00000054931	predicted gene 11272	NM_001039115	Zkscan4	42	0.00320579	28	0.00196575	42	0.00384602	37.3333	0.00300585	1	0.372178	0.46315	0.0804985	-0.0200093	34.6413	0.955758	45	0.00258598	19	0.00139797	48	0.00344405	37.3333	0.002476	1	0.546544	0.834019	0.374986	-0.00776287	89.2901	0.837449
ENSMUSG00000034839	La ribonucleoprotein domain family, member 6	NM_026235	Larp6	85	0.0063994	85	0.00594562	66	0.00600287	78.6667	0.00611596	1	0.563743	0.302637	0.0902153	-0.0199775	34.6964	0.999899	2	9.37544e-05	1	6.57902e-05	1	6.02697e-05	1.33333	7.32714e-05	1	2.0015	-0.133132	-0.0228603	N/A	N/A	N/A
ENSMUSG00000072082	cyclin F	NM_007634	Ccnf	992	0.0587908	1247	0.0678706	1076	0.0764886	1105	0.0677167	1	0.633962	0.214928	0.104033	-0.0199728	34.7045	0.980057	1677	0.0750568	1051	0.0601612	1461	0.0815547	1396.33	0.0722576	1	0.591396	0.368817	0.177759	-0.0149675	46.3103	0.995199
ENSMUSG00000044499	heparan sulfate (glucosamine) 3-O-sulfotransferase 5	NM_001253356,NM_001081208,NM_001253355	Hs3st5	36	0.000611382	33	0.000520024	36	0.000738689	35	0.000623365	1	0.556921	0.278741	0.0945215	-0.0199619	34.7235	0.998955	4	4.93231e-05	3	4.84776e-05	1	1.46694e-05	2.66667	3.749e-05	1	-0.0219625	0.228979	-0.0121094	N/A	N/A	N/A
ENSMUSG00000060212	pecanex-like 2 (Drosophila)	NM_175561	Pcnxl2	4	3.31365e-05	5	3.7908e-05	0	-1.39079e-06	3	2.32179e-05	1	0.433291	0.120339	0.153222	-0.0199598	34.7271	0.865289	12	7.5419e-05	6	4.81964e-05	16	0.000125492	11.3333	8.30359e-05	1	0.487488	1.08332	0.436898	-0.00614388	112.819	0.590431
ENSMUSG00000086920				22	0.00817067	10	0.00336571	17	0.00753935	16.3333	0.00635858	1	0.355607	0.313005	0.0998515	-0.0199576	34.731	0.974253	34	0.00953026	15	0.00538168	31	0.0108445	26.6667	0.00858549	1	0.378508	0.384323	0.322352	-0.0117659	58.9117	0.833267
ENSMUSG00000046818	DNA-damage-inducible transcript 4-like	NM_030143	Ddit4l	307	0.0165605	214	0.0107237	266	0.0173336	262.333	0.0148726	1	0.388893	0.203187	0.121473	-0.0199428	34.7568	0.954447	16	0.000599463	5	0.00024762	8	0.000375194	9.66667	0.000407426	1	0.203842	0.714248	0.66002	-0.00623079	111.245	0.260631
ENSMUSG00000015053	GATA binding protein 2	NM_008090	Gata2	136	0.00392214	156	0.0041798	100	0.00348384	130.667	0.00386193	1	0.570316	0.204146	0.110522	-0.0199199	34.7967	0.975088	3	5.31141e-05	2	5.0825e-05	2	4.81126e-05	2.33333	5.06839e-05	1	-0.133984	0.312638	1.10404	N/A	N/A	N/A
ENSMUSG00000030446	zinc finger protein 273	NM_198322	Zfp273	150	0.0118545	47	0.0033781	80	0.00757162	92.3333	0.0076014	1	0.208562	0.251604	0.128238	-0.0199092	34.8154	0.873175	114	0.0067667	57	0.00434177	100	0.00742409	90.3333	0.00617752	1	0.328987	0.391995	0.189744	-0.0152906	45.3316	0.906337
ENSMUSG00000043346	N-acetylneuraminic acid phosphatase		Gm6741	69	0.00950416	43	0.0053935	59	0.00976949	57	0.00822239	1	0.415688	0.173427	0.130226	-0.019898	34.835	0.935916	60	0.00621327	50	0.00663966	50	0.00646613	53.3333	0.00643969	1	0.585655	0.302783	0.179726	-0.0155394	44.6059	0.979482
ENSMUSG00000090120				18	0.00529742	10	0.0027263	13	0.00461043	13.6667	0.00421138	1	0.387333	0.737094	0.0644755	-0.01988	34.8665	0.877917	5	0.00109341	2	0.000564005	5	0.00137498	4	0.0010108	1	0.231492	0.708469	1.00391	-0.00339192	204.352	0.0962247
ENSMUSG00000049872	family with sequence similarity 26, member E	NM_178908	Fam26e	38	0.00390806	30	0.00286537	34	0.00422271	34	0.00366538	1	0.618853	0.244912	0.10002	-0.0198463	34.9258	0.991173	1	6.54622e-05	1	9.57895e-05	2	0.000185841	1.33333	0.000115697	1	4.03773	1.45673	0.513268	-0.000825015	840.163	0.0050761
ENSMUSG00000074384	expressed sequence AI429214	NM_001039220	AI429214	54	0.00501175	55	0.00449309	64	0.00707857	57.6667	0.0055278	1	0.428886	0.207234	0.119655	-0.0198206	34.9711	0.96408	214	0.0151126	180	0.0162505	179	0.0157574	191	0.0157068	1	0.710925	0.501186	0.334862	-0.00968078	71.6003	0.989255
ENSMUSG00000045165	expressed sequence AI467606	NM_178901	AI467606	34	0.00325576	34	0.00302563	42	0.00485838	36.6667	0.00371326	1	0.640817	0.37821	0.0809438	-0.019755	35.0873	0.988246	1	6.21329e-05	0	-3.40639e-06	1	8.14879e-05	0.666667	4.67381e-05	1	-0.106829	1.63523	1.08991	N/A	N/A	N/A
ENSMUSG00000037958	coiled-coil domain containing 55; similar to CG15747-PA	NM_001012309	Ccdc55	991	0.0448365	546	0.0225252	784	0.0426109	773.667	0.0366575	1	0.460573	0.349904	0.0921544	-0.0197026	35.1805	0.992993	958	0.0326097	605	0.0263948	752	0.0319619	771.667	0.0303221	1	0.584158	0.439259	0.28187	-0.011505	60.2474	0.973684
ENSMUSG00000048921	zinc finger protein 689	NM_175163	Zfp689	83	0.0044378	111	0.00543079	79	0.00504318	91	0.00497059	1	0.419453	0.134483	0.152483	-0.0196893	35.2043	0.880938	151	0.00610029	116	0.00599408	152	0.00766117	139.667	0.00658518	1	0.348439	0.155144	0.131294	-0.0204799	33.8452	0.910545
ENSMUSG00000060314	cDNA sequence BC066028	NM_001001180	Zfp941	37	0.000969988	13	0.000315426	42	0.00132757	30.6667	0.000870994	1	0.235116	0.283245	0.121438	-0.0196888	35.2051	0.900941	6	0.000115598	3	7.53925e-05	12	0.000293268	7	0.000161419	1	0.793787	0.719516	0.417974	-0.00695021	99.7304	0.989502
ENSMUSG00000034098	follistatin-like 5	NM_178673,NM_001253719	Fstl5	2	3.2936e-05	2	3.06055e-05	12	0.000238751	5.33333	0.000100764	1	1.74288	0.30617	0.0708742	-0.0196811	35.219	0.839989	0	-1.01512e-07	0	-3.4457e-08	0	-4.15258e-07	0	-1.83742e-07	1	1.79907	1.32376	0.103671	-0.0125681	55.1513	0.536872
ENSMUSG00000021835	bone morphogenetic protein 4	NM_007554	Bmp4	556	0.0242467	546	0.022076	550	0.0289501	550.667	0.0250909	1	0.527778	0.225746	0.11129	-0.0196797	35.2214	0.983275	124	0.00400276	81	0.00337779	99	0.00400668	101.333	0.00379574	1	0.816318	0.567393	0.406513	-0.00783638	88.4525	0.989794
ENSMUSG00000038046	RNA methyltransferase like 1	NM_183263	Rnmtl1	335	0.0195175	257	0.0135908	292	0.0204008	294.667	0.0178364	1	0.463602	0.243057	0.110903	-0.0196731	35.2333	0.984813	491	0.0215822	362	0.0203688	384	0.0210584	412.333	0.0210031	1	0.65092	0.33448	0.260225	-0.0127056	54.5543	0.954645
ENSMUSG00000037169	v-myc myelocytomatosis viral related oncogene, neuroblastoma derived (avian)	NM_008709	Mycn	223	0.00693425	211	0.0059908	258	0.00961488	230.667	0.00751331	1	0.655788	0.255538	0.0991998	-0.0196717	35.2358	0.991233	476	0.0111969	253	0.00761058	410	0.0120255	379.667	0.0102777	1	0.518262	0.624447	0.219315	-0.0121715	56.9484	0.947276
ENSMUSG00000096433		NM_001205095		178	0.00667972	194	0.00666496	137	0.00617024	169.667	0.00650497	1	0.336678	0.226802	0.12449	-0.0196668	35.2445	0.946	197	0.00556705	179	0.00647849	152	0.00536216	176	0.00580257	1	0.475534	0.378393	0.256376	-0.012907	53.7033	0.939986
ENSMUSG00000093739				8	0.00215025	7	0.00172402	15	0.00485783	10	0.0029107	1	0.651753	0.0876031	0.170057	-0.0196579	35.2606	0.789502	16	0.00325164	7	0.00181913	14	0.00354457	12.3333	0.00287178	1	0.658005	0.412541	0.499914	-0.00787724	87.9937	0.81451
ENSMUSG00000051037	zinc finger protein 455	NM_001048204	Zfp455	59	0.00205277	31	0.000982899	62	0.00259286	50.6667	0.00187618	1	0.264094	0.260771	0.123705	-0.0196494	35.2758	0.91825	53	0.00138665	35	0.00117405	54	0.00176423	47.3333	0.00144165	1	0.663951	0.391187	0.259104	-0.0122044	56.7947	0.980003
ENSMUSG00000028016	integrator complex subunit 12	NM_027927	Ints12	1079	0.023199	668	0.0131134	814	0.0210498	853.667	0.0191207	1	0.470418	0.313338	0.0983538	-0.019606	35.3537	0.996035	899	0.0145271	683	0.0141541	633	0.0127737	738.333	0.0138183	1	0.681523	0.448251	0.221087	-0.0127381	54.4152	0.999404
ENSMUSG00000046380	jerky	NM_008415	Jrk	159	0.00505418	193	0.00558696	204	0.00777938	185.333	0.00614017	1	0.506954	0.15206	0.138659	-0.019602	35.3611	0.917796	332	0.00798208	256	0.00787189	298	0.00893277	295.333	0.00826225	1	0.662712	0.185734	0.150721	-0.018012	38.4825	0.931301
ENSMUSG00000022120	ring finger protein 219	NM_026047	Rnf219	994	0.0526426	729	0.0351447	951	0.0604673	891.333	0.0494182	1	0.627076	0.265378	0.0998309	-0.0195825	35.3962	0.994556	1562	0.0624413	931	0.0476286	1155	0.057585	1216	0.055885	1	0.516428	0.314891	0.131395	-0.0176033	39.376	0.99417
ENSMUSG00000054715	zinc finger and SCAN domain containing 22	NM_001001447	Zscan22	328	0.00629975	294	0.00515473	338	0.00780122	320	0.00641857	1	0.500379	0.186026	0.12616	-0.0195825	35.3963	0.95441	465	0.00673658	327	0.00606359	358	0.00646863	383.333	0.00642293	1	0.639363	0.293122	0.251192	-0.0133774	51.8148	0.935707
ENSMUSG00000087598		NM_019940		418	0.00424762	327	0.00303157	451	0.00549806	398.667	0.00425908	1	0.46676	0.192103	0.127038	-0.0195468	35.461	0.955289	652	0.00500075	380	0.00372967	585	0.0055968	539	0.00477574	1	0.345932	0.299667	0.18607	-0.0161876	42.8196	0.915964
ENSMUSG00000031079	zinc finger protein 300	NM_183185	Zfp300	126	0.00388409	72	0.00205237	119	0.00442643	105.667	0.00345429	1	0.33188	0.22195	0.128745	-0.0195449	35.4644	0.939511	34	0.000778425	21	0.000621347	27	0.000774526	27.3333	0.000724766	1	0.309158	0.375968	0.222252	-0.0145177	47.7448	0.866558
ENSMUSG00000049907	RAS-like, family 11, member B	NM_026878	Rasl11b	504	0.0512745	472	0.0439717	524	0.0637664	500	0.0530042	1	0.363232	0.284784	0.111242	-0.019538	35.4769	0.971581	893	0.0686317	473	0.0464978	890	0.0853298	752	0.0668198	1	0.463949	0.929124	0.146969	-0.0136272	50.865	0.821544
ENSMUSG00000085918				0	-2.95475e-06	0	-1.80207e-05	0	-5.73519e-06	0	-8.90353e-06	1	1.47081	0.128943	0.116741	-0.0195272	35.4965	0.804531	12	0.000830476	11	0.000972532	6	0.000517491	9.66667	0.0007735	1	0.974873	0.656257	0.332874	-0.00836161	82.8964	0.952007
ENSMUSG00000030043	tachykinin receptor 1	NM_009313	Tacr1	5	0.000182792	10	0.000339715	8	0.000352585	7.66667	0.000291697	1	1.04573	0.183702	0.106541	-0.0195255	35.4996	0.913567	0	-5.6338e-07	0	-3.82467e-07	2	6.80544e-05	0.666667	2.23695e-05	1	1.07944	0.794255	-0.00140432	N/A	N/A	N/A
ENSMUSG00000074576	molybdenum cofactor synthesis 3	NM_001160330	Mocs3	112	0.0121803	119	0.0118747	106	0.0138244	112.333	0.0126265	1	0.372103	0.166123	0.145257	-0.0195169	35.5153	0.908823	178	0.0146128	104	0.0109217	143	0.0146438	141.667	0.0133928	1	0.460245	0.402203	0.209498	-0.0140472	49.3441	0.96248
ENSMUSG00000064938	ENSMUSG00000077569; ENSMUSG00000064938		Mir3068	7	0.00944122	5	0.00616945	4	0.00621464	5.33333	0.0072751	1	0.123409	0.124799	0.221534	-0.019497	35.5516	0.654331	20	0.0204558	6	0.00784388	25	0.0319005	17	0.0200667	1	0.175545	0.119943	0.159726	-0.0211405	32.7876	0.775699
ENSMUSG00000035551	insulin-like growth factor binding protein-like 1	NM_018741	Igfbpl1	6	0.000305556	11	0.000519639	71	0.00436839	29.3333	0.00173119	1	0.290481	1.11529	0.0598937	-0.01949	35.5642	0.758486	0	-9.4175e-07	1	4.84418e-05	0	-7.5979e-06	0.333333	1.33007e-05	1	0.299845	-0.0582365	0.0876094	N/A	N/A	N/A
ENSMUSG00000054978	RIKEN cDNA 5430433E21 gene	NM_028974	Kbtbd13	32	0.00197564	47	0.00269009	39	0.0028994	39.3333	0.00252171	1	0.816741	0.313141	0.0874809	-0.0194762	35.5895	0.978743	16	0.000739317	9	0.000532616	21	0.00121421	15.3333	0.000828715	1	0.656511	0.960287	0.0949714	-0.0157438	44.0267	0.818872
ENSMUSG00000086942				11	0.00207023	7	0.00118103	9	0.00201362	9	0.00175496	1	0.871158	0.2672	0.0931983	-0.0194755	35.5908	0.969781	25	0.00356103	15	0.00273309	23	0.00408668	21	0.00346027	1	0.607796	0.769823	0.434443	-0.00691407	100.252	0.893327
ENSMUSG00000074890	leucine carboxyl methyltransferase 2	NM_177846	Lcmt2	78	0.00260733	91	0.00278276	74	0.00295091	81	0.00278033	1	0.390711	0.212361	0.127891	-0.0194683	35.6039	0.953393	202	0.005116	106	0.00343187	167	0.0052742	158.333	0.00460736	1	0.289386	0.224105	0.149459	-0.0187844	36.9001	0.90276
ENSMUSG00000086421				20	0.00418245	23	0.00432454	39	0.00979852	27.3333	0.00610184	1	0.560905	0.247209	0.108763	-0.0194406	35.6546	0.990778	46	0.00728132	46	0.00931348	53	0.0104566	48.3333	0.00901714	1	0.967076	0.250663	0.377197	-0.0106361	65.1695	0.745963
ENSMUSG00000072761	ENSMUSG00000072761		Gm6712	55	0.0226983	41	0.0153369	41	0.0202968	45.6667	0.019444	1	0.458215	0.303852	0.103503	-0.0194214	35.6899	0.99391	74	0.0230275	60	0.0239074	51	0.019803	61.6667	0.022246	1	0.53769	0.613096	0.352817	-0.00915264	75.7319	0.926053
ENSMUSG00000027636	Src-like-adaptor 2	NM_029983	Sla2	11	0.000361	7	0.000213472	12	0.000475794	10	0.000350088	1	0.712998	0.524864	0.0708742	-0.0193887	35.75	0.94283	0	-1.11263e-06	0	-2.40336e-07	0	-8.27545e-07	0	-7.26838e-07	1	0.735984	2.2693	0.103671	-0.0122758	56.4647	0.482514
ENSMUSG00000048138	doublesex and mab-3 related transcription factor 2	NM_145831	Dmrt2	249	0.0194998	269	0.0195741	186	0.0175974	234.667	0.0188904	1	0.451451	0.188941	0.132609	-0.0193799	35.7664	0.947609	0	-6.01002e-05	1	5.33547e-05	1	4.29403e-05	0.666667	1.20649e-05	1	-0.682718	0.682637	-0.138261	N/A	N/A	N/A
ENSMUSG00000038888	ATP binding domain 3	NM_145582	Ctu1	160	0.011772	186	0.0123577	194	0.0170905	180	0.0137401	1	0.662025	0.230081	0.109967	-0.0193356	35.8483	0.981063	523	0.029218	356	0.025425	397	0.0276449	425.333	0.0274293	1	0.623991	0.309874	0.25416	-0.013165	52.6507	0.943633
ENSMUSG00000065378	ENSMUSG00000065378; ENSMUSG00000084668		Gm22744	120	0.342615	78	0.202891	64	0.219144	87.3333	0.254883	1	0.47954	0.375687	0.0933837	-0.0193287	35.861	0.991662	185	0.398639	96	0.264737	85	0.228483	122	0.297286	1	0.277658	0.465218	0.176295	-0.0154829	44.7685	0.864677
ENSMUSG00000096696		NM_001163919,NM_001005358		50	0.00343328	18	0.00111438	26	0.00212707	31.3333	0.00222491	1	0.172989	0.314762	0.13243	-0.0192908	35.9315	0.827275	64	0.00331254	31	0.00205505	52	0.00336119	49	0.00290959	1	0.366173	0.278779	0.11514	-0.0193742	35.7769	0.970034
ENSMUSG00000036214	RIKEN cDNA 1700022C21 gene	NM_029602	Znrd1as	92	0.00637408	62	0.00390653	76	0.00632406	76.6667	0.00553489	1	0.500448	0.321057	0.10059	-0.0192878	35.9371	0.998059	121	0.00632026	80	0.00535047	83	0.00540873	94.6667	0.00569315	1	0.628775	0.603934	0.325218	-0.00946921	73.2001	0.978851
ENSMUSG00000019785	retinaldehyde binding protein 1-like 2	NM_175448	Clvs2	7	0.000129685	5	8.57473e-05	11	0.000246212	7.66667	0.000153882	1	0.622459	0.491761	0.077043	-0.0192812	35.9493	0.962584	0	-3.99702e-07	1	1.7739e-05	0	-4.28235e-07	0.333333	5.63703e-06	1	0.642526	-0.0115709	-40.4617	N/A	N/A	N/A
ENSMUSG00000000303	cadherin 1	NM_009864	Cdh1	54	0.000214513	211	1.48731e-05	76	-0.000583847	113.667	-0.000118154	1	1.18768	8.8921	0.0154755	-0.0192566	35.9953	0.315968	16484	0.271829	10953	0.230743	11385	0.233976	12940.7	0.245516	1	0.988516	1.05794	1.0731	0.000608418	>Capzb	0.844609
ENSMUSG00000043230	family with sequence similarity 124, member B	NM_173425	Fam124b	58	0.00297656	42	0.00200311	58	0.00359542	52.6667	0.00285837	1	0.375656	0.145795	0.161296	-0.0192512	36.0054	0.876087	2	6.81814e-05	0	-2.25519e-06	2	9.01501e-05	1.33333	5.20254e-05	1	-0.0521754	0.630361	0.517586	N/A	N/A	N/A
ENSMUSG00000063919	RIKEN cDNA 1500001A10 gene	NM_026886	Srrm4	8	6.26825e-05	9	6.52704e-05	34	0.000321799	17	0.000149917	1	0.762176	0.477698	0.0748149	-0.0192382	36.0297	0.952768	1	5.71338e-06	2	1.50178e-05	2	1.41623e-05	1.66667	1.16312e-05	1	1.18279	0.715311	1.55282	0.00199699	>Capzb	0.225598
ENSMUSG00000084644	RNA, Y3 small cytoplasmic (associated with Ro protein); RNA, Y1 small cytoplasmic, Ro-associated			6	0.012923	3	0.00590223	7	0.0181212	5.33333	0.0123155	1	0.143985	0.414367	0.121968	-0.0192318	36.0417	0.780266	5	0.00809387	3	0.00622783	6	0.0121323	4.66667	0.00881801	1	0.469508	0.479858	0.166408	-0.0149172	46.4662	0.97202
ENSMUSG00000074637	SRY-box containing gene 2	NM_011443	Sox2	24	0.00179202	26	0.00179567	53	0.00478304	34.3333	0.00279024	1	0.508625	0.355004	0.0962406	-0.0192237	36.057	0.996447	5	0.000275977	7	0.000501441	1	6.18443e-05	4.33333	0.000279754	1	-0.0105074	0.0973539	1.11403	N/A	N/A	N/A
ENSMUSG00000092887				15	0.0354693	14	0.0294277	16	0.0450961	15	0.0366644	1	0.811698	0.227923	0.107243	-0.0192012	36.0992	0.965791	43	0.077108	37	0.0848475	39	0.0872012	39.6667	0.0830522	1	0.679916	0.233831	0.179262	-0.0161392	42.9479	0.94398
ENSMUSG00000032128	roundabout homolog 3 (Drosophila)	NM_001164767	Robo3	2	1.79545e-05	1	8.1819e-06	95	0.00103037	32.6667	0.000352167	1	1.74288	2.4973	0.0268576	-0.0191791	36.1407	0.488543	0	-5.53375e-08	1	8.63326e-06	0	-1.79211e-06	0.333333	2.26194e-06	1	1.79907	-0.0115206	0.0392859	N/A	N/A	N/A
ENSMUSG00000036904	frizzled homolog 8 (Drosophila)	NM_008058	Fzd8	62	0.0033727	94	0.00464953	93	0.00606625	83	0.00469616	1	0.826983	0.258376	0.100656	-0.0191759	36.1467	0.973442	192	0.00792634	145	0.00765196	170	0.00874719	169	0.0081085	1	0.73099	0.572156	0.276248	-0.0104379	66.4069	0.997208
ENSMUSG00000064731	ENSMUSG00000065463; ENSMUSG00000065738; ENSMUSG00000064731		Snord45b	36	0.094034	12	0.0285277	20	0.0626279	22.6667	0.0617299	1	0.217439	0.311838	0.127951	-0.0191759	36.1468	0.878209	47	0.0925505	15	0.0378201	26	0.0638961	29.3333	0.0647556	1	0.224011	0.384187	0.269002	-0.0137483	50.4168	0.732444
ENSMUSG00000046546	family with sequence similarity 43, member A	NM_177632	Fam43a	248	0.0148003	285	0.0158015	279	0.0201125	270.667	0.0169048	1	0.56221	0.204101	0.124964	-0.0191636	36.1699	0.966394	17	0.000719068	6	0.000326992	12	0.000637711	11.6667	0.000561257	1	0.402262	1.22059	0.516679	-0.00500526	138.484	0.362816
ENSMUSG00000069755	zinc finger protein 125		Zfp125	30	0.0100816	101	0.0307112	28	0.0112942	53	0.0173623	1	0.610037	0.378343	0.0904257	-0.0191287	36.2361	0.992986	41	0.0103902	157	0.0509453	33	0.0104337	77	0.0239231	1	0.398769	0.472804	0.45453	-0.00884363	78.3781	0.728851
ENSMUSG00000095139		NM_008899		4	0.000117038	4	0.000108756	16	0.000564992	8	0.000263596	1	0.217861	0.459256	0.106237	-0.0191246	36.2437	0.869008	0	-3.60721e-07	0	-1.22443e-07	2	5.39755e-05	0.666667	1.78308e-05	1	0.224884	1.98564	0.505578	-0.00452144	153.302	0.122184
ENSMUSG00000084519	ENSMUSG00000065862; ENSMUSG00000065151; ENSMUSG00000065088; ENSMUSG00000064697; ENSMUSG00000065739; ENSMUSG00000084519; ENSMUSG00000064836; ENSMUSG00000064692			18	0.0214419	17	0.0184313	21	0.0297651	18.6667	0.0232128	1	0.386216	0.257189	0.123612	-0.0190948	36.3004	0.967887	45	0.0406024	24	0.027688	53	0.0596412	40.6667	0.0426439	1	0.363894	0.360379	0.075277	-0.0212673	32.5921	0.976528
ENSMUSG00000047166	tigger transposable element derived 5		Tigd5	58	0.00444275	53	0.0037121	65	0.00597274	58.6667	0.0047092	1	0.314523	0.175266	0.157932	-0.0190825	36.3237	0.884974	94	0.00543605	56	0.00414343	86	0.0062033	78.6667	0.00526092	1	0.361	0.399253	0.220611	-0.014128	49.0621	0.905675
ENSMUSG00000025058	RIKEN cDNA 5430427O19 gene	NM_001163539	5430427O19Rik	11	0.000537939	5	0.000227216	9	0.000531749	8.33333	0.000432302	1	0.316458	0.122468	0.188998	-0.0190706	36.3465	0.80781	0	-1.65798e-06	0	-2.5581e-07	0	-9.24867e-07	0	-9.46218e-07	1	-25.6763	0.529503	0.276456	N/A	N/A	N/A
ENSMUSG00000044469	tumor necrosis factor, alpha-induced protein 8-like 1	NM_025566	Tnfaip8l1	609	0.0469739	457	0.0326334	521	0.0484594	529	0.0426889	1	0.450316	0.251181	0.120918	-0.0190659	36.3553	0.980283	175	0.0100352	107	0.00791482	161	0.0115875	147.667	0.00984582	1	0.671418	0.577858	0.217387	-0.0120627	57.4618	0.986284
ENSMUSG00000046441	FtsJ methyltransferase domain containing 1	NM_146215	Cmtr2	280	0.0143269	161	0.00752569	201	0.012344	214	0.0113989	1	0.31307	0.223627	0.140395	-0.0190636	36.3598	0.922394	320	0.0123327	167	0.00824313	224	0.0107757	237	0.0104505	1	0.48313	0.362483	0.173806	-0.0154862	44.7591	0.980909
ENSMUSG00000095253		NM_177359		918	0.0287828	482	0.0137534	829	0.0311577	743	0.0245646	1	0.347178	0.198799	0.145393	-0.019051	36.3838	0.921078	1294	0.0306017	611	0.0184972	1112	0.032814	1005.67	0.0273043	1	0.442323	0.351656	0.232628	-0.0138717	49.9684	0.936285
ENSMUSG00000080486	ENSMUSG00000080486			41	0.102798	29	0.0663889	20	0.0596617	30	0.0762828	1	0.190033	0.192259	0.172235	-0.019038	36.4085	0.799322	38	0.0716608	30	0.0725185	41	0.0966794	36.3333	0.0802862	1	0.462954	0.408633	0.146028	-0.0162791	42.5789	0.982936
ENSMUSG00000060260	PWWP domain containing 2B	NM_001033206,NM_001098636	Pwwp2b	214	0.00780003	278	0.00913531	221	0.00955807	237.667	0.00883114	1	0.626862	0.191575	0.128324	-0.0190234	36.4365	0.954684	1032	0.0286935	613	0.0217813	784	0.0271719	809.667	0.0258823	1	0.637056	0.452031	0.242049	-0.0122434	56.6137	0.995406
ENSMUSG00000051022	heparan sulfate (glucosamine) 3-O-sulfotransferase 1	NM_010474	Hs3st1	119	0.0045104	179	0.00628862	112	0.00512246	136.667	0.00530716	1	0.666706	0.271178	0.106493	-0.0190065	36.469	0.991874	55	0.00155901	35	0.00127162	32	0.00113158	40.6667	0.00132074	1	0.272837	0.117913	0.0931325	-0.0239197	28.978	0.909331
ENSMUSG00000022346	myelocytomatosis oncogene	NM_001177353,NM_010849,NM_001177352,NM_001177354	Myc	503	0.00843506	675	0.0102864	519	0.0103297	565.667	0.00968372	1	0.456251	0.180925	0.143716	-0.01899	36.5006	0.933404	2206	0.0281836	1180	0.0192652	1758	0.0279984	1714.67	0.025149	1	0.36581	0.309882	0.137422	-0.0179168	38.687	0.959543
ENSMUSG00000044551	RIKEN cDNA 9930012K11 gene	NM_001112735,NM_001004155	9930012K11Rik	447	0.0112587	314	0.00733052	386	0.0117355	382.333	0.0101082	1	0.473618	0.281358	0.114589	-0.018967	36.5449	0.991144	66	0.00121853	48	0.00115611	58	0.0013521	57.3333	0.00124225	1	0.514737	0.491154	0.294591	-0.0110711	62.609	0.949309
ENSMUSG00000024868	dickkopf homolog 1 (Xenopus laevis)	NM_010051	Dkk1	417	0.0315777	347	0.0244152	420	0.038425	394.667	0.0314726	1	0.420042	0.229401	0.131619	-0.0189259	36.6242	0.962694	2	1.68082e-05	2	0.000118318	1	4.28666e-06	1.66667	4.64709e-05	1	1.46121	1.54876	13.5665	0.018547	>Capzb	0.911225
ENSMUSG00000056501	CCAAT/enhancer binding protein (C/EBP), beta	NM_009883	Cebpb	45	0.00546021	46	0.00511814	49	0.00713307	46.6667	0.00590381	1	0.482863	0.336652	0.105452	-0.0188943	36.6855	0.99582	102	0.00936696	46	0.00540049	74	0.00847181	74	0.00774642	1	0.45869	0.689682	0.0132889	-0.0298504	23.2207	0.867409
ENSMUSG00000024232	BMP and activin membrane-bound inhibitor, homolog (Xenopus laevis)	NM_026505	Bambi	518	0.0188304	289	0.00964492	359	0.0156955	388.667	0.0147236	1	0.565357	0.406139	0.0927023	-0.0188665	36.7397	0.990222	401	0.01095	212	0.00742381	275	0.00938075	296	0.00925152	1	0.882604	0.778344	0.130716	-0.0139126	49.8214	0.867206
ENSMUSG00000003227	ectodysplasin-A receptor	NM_010100	Edar	6	1.53076e-05	27	-0.000219017	5	-0.000629912	12.6667	-0.000277874	1	2.93153	0.590158	0.0511115	-0.0188479	36.7758	0.653249	2125	0.0810564	1649	0.0803548	1776	0.0844267	1850	0.081946	1	0.809253	0.638714	0.732097	-0.00373906	185.38	0.770336
ENSMUSG00000049562	predicted gene 962	NM_001033448	Ap5b1	28	0.00163798	30	0.00155897	26	0.00179667	28	0.00166454	1	0.618627	0.342727	0.0992301	-0.0188304	36.81	0.998032	155	0.00693097	91	0.00520037	111	0.00618706	119	0.00610613	1	0.581105	0.33279	0.197954	-0.0146384	47.3513	0.980928
ENSMUSG00000071256	zinc finger protein 213	NM_001033496	Zfp213	671	0.0460547	500	0.0313732	540	0.0445147	570.333	0.0406475	1	0.458444	0.251904	0.124981	-0.0188186	36.8331	0.979428	686	0.0354376	492	0.0325636	540	0.0348264	572.667	0.0342759	1	0.619611	0.393936	0.171963	-0.0148948	46.5362	0.999244
ENSMUSG00000016510	mitochondrial translational initiation factor 3	NM_029581,NM_001256102,NM_001256100,NM_001256101	Mtif3	250	0.00448899	234	0.00384514	217	0.00467877	233.667	0.00433763	1	0.448247	0.25197	0.125713	-0.0188164	36.8374	0.97768	280	0.00378636	221	0.00382746	229	0.0038652	243.333	0.00382634	1	0.610527	0.335592	0.266184	-0.012653	54.7811	0.949308
ENSMUSG00000048728	zinc finger protein 454	NM_172794	Zfp454	299	0.00685588	169	0.00354726	227	0.00625316	231.667	0.0055521	1	0.374277	0.252988	0.131523	-0.018803	36.8637	0.958708	282	0.00486398	153	0.00338193	214	0.00460911	216.333	0.00428501	1	0.694109	0.4144	0.2381	-0.0124877	55.5065	0.992774
ENSMUSG00000039208	meteorin, glial cell differentiation regulator-like	NM_144797	Metrnl	155	0.0089665	146	0.00751026	133	0.0091843	144.667	0.00855369	1	0.67587	0.40243	0.0899621	-0.0188027	36.8643	0.98521	544	0.0239127	396	0.0222547	328	0.017973	422.667	0.0213801	1	0.759177	0.427893	0.197959	-0.013416	51.6658	0.994695
ENSMUSG00000058755	oncostatin M	NM_001013365	Osm	7	0.000422501	4	0.000224346	5	0.000364606	5.33333	0.000337151	1	0.372799	0.153085	0.170098	-0.018771	36.9264	0.872384	0	-1.30219e-06	0	-2.52579e-07	0	-6.34156e-07	0	-7.29641e-07	1	-40.4769	0.661879	0.248811	N/A	N/A	N/A
ENSMUSG00000036602	ALX homeobox 1	NM_172553	Alx1	8	0.00021546	5	0.000121502	11	0.000354056	8	0.00023034	1	0.544798	0.630309	0.0763792	-0.0187597	36.9487	0.924153	17	0.000346345	9	0.000234553	21	0.000533596	15.6667	0.000371498	1	0.343652	0.560204	0.380742	-0.00966599	71.7099	0.73299
ENSMUSG00000020656	grainyhead-like 1 (Drosophila); similar to Grhl1 protein	NM_001161406,NM_145890	Grhl1	12	0.000264937	21	0.000200248	16	0.000381783	16.3333	0.000282323	1	0.052278	0.72028	0.128657	-0.0187458	36.9762	0.51002	973	0.0206848	696	0.0189026	557	0.0147569	742	0.0181148	1	0.982318	0.703186	0.6598	-0.00378632	183.066	0.911625
ENSMUSG00000049291	predicted gene 249	NM_001045521	Prss38	1	0.000147417	4	0.000548254	0	-4.62799e-06	1.66667	0.000230348	1	1.74277	0.151771	0.116741	-0.0187404	36.9867	0.783101	2	0.000222927	1	0.000142067	3	0.000417588	2	0.000260861	1	1.16856	2.17221	0.332874	-0.00427412	162.173	0.188052
ENSMUSG00000056749	similar to NFIL3/E4BP4 transcription factor; nuclear factor, interleukin 3, regulated	NM_017373	Nfil3	138	0.0124944	192	0.0161111	152	0.0166017	160.667	0.0150691	1	0.428825	0.214034	0.139954	-0.0187233	37.0205	0.951908	66	0.00447039	39	0.00338557	49	0.00414294	51.3333	0.00399963	1	0.586146	0.627749	0.32693	-0.00942453	73.5471	0.958127
ENSMUSG00000051147	N-acetyltransferase 2 (arylamine N-acetyltransferase)	NM_010874,NM_001168577	Nat2	103	0.00661432	81	0.00474699	74	0.0056996	86	0.00568697	1	0.328275	0.160699	0.173192	-0.0187044	37.058	0.863507	125	0.00604847	89	0.00551477	90	0.00543563	101.333	0.00566629	1	0.562274	0.34844	0.277442	-0.0124015	55.8924	0.941632
ENSMUSG00000079339	predicted gene 14446	NM_001101605,NM_001110517		25	0.00103913	16	0.000612015	21	0.00105055	20.6667	0.000900567	1	0.870088	0.462249	0.0800549	-0.0187026	37.0616	0.945688	22	0.000687533	10	0.000400409	15	0.000585098	15.6667	0.00055768	1	0.957417	1.08125	0.667469	-0.00238783	290.284	0.628628
ENSMUSG00000050930	RIKEN cDNA 4933403G14 gene	NM_028908	Map10	98	0.00505511	92	0.00436519	93	0.00576224	94.3333	0.00506085	1	0.390681	0.161205	0.16578	-0.0186959	37.0749	0.88748	104	0.00403866	62	0.00308274	93	0.00450813	86.3333	0.00387651	1	0.393659	0.243788	0.0855558	-0.0215707	32.1338	0.987433
ENSMUSG00000082779	ENSMUSG00000082779			7	0.00283181	3	0.00112442	7	0.00340775	5.66667	0.00245466	1	0.870387	0.204515	0.120666	-0.0186857	37.0951	0.941333	9	0.00274449	1	0.000389538	6	0.00228152	5.33333	0.00180518	1	0.779517	0.721357	0.667026	-0.00400322	173.147	0.910423
ENSMUSG00000092713				10	0.0243402	7	0.015259	11	0.0322075	9.33333	0.0239356	1	0.782131	0.542919	0.0761126	-0.0186817	37.1029	0.933402	19	0.0349541	15	0.0353115	12	0.0275154	15.3333	0.0325937	1	0.800403	0.528497	0.583495	-0.00579834	119.542	0.851248
ENSMUSG00000052616	coiled-coil domain containing 79	NM_180958	Ccdc79	6	9.38072e-05	4	4.61907e-05	5	8.65171e-05	5	7.5505e-05	1	0.0925043	0.338351	0.164566	-0.0186756	37.1151	0.652848	98	0.00120723	50	0.000786989	72	0.00110546	73.3333	0.00103322	1	0.859658	1.03949	0.596454	-0.00339807	203.983	0.748917
ENSMUSG00000040025	YTH domain family 2; predicted gene 6823	NM_145393	Ythdf2	1543	0.034689	1310	0.0268527	1527	0.0411507	1460	0.0342308	1	0.581312	0.251333	0.120915	-0.0186588	37.1484	0.987302	2655	0.045082	1591	0.0345636	2198	0.0465511	2148	0.0420655	1	0.605422	0.392323	0.204494	-0.0138445	50.0666	0.993418
ENSMUSG00000071661	zinc finger and BTB domain containing 3	NM_001098237,NM_133759	Zbtb3	106	0.00953624	89	0.00735555	92	0.00993557	95.6667	0.00894246	1	0.327835	0.159371	0.176112	-0.0186267	37.2126	0.859148	88	0.00594997	63	0.00546029	92	0.00777317	81	0.00639448	1	0.519342	0.389134	0.34755	-0.0107464	64.5003	0.895633
ENSMUSG00000034509	MAD2L1 binding protein	NM_025649	Mad2l1bp	258	0.0372954	313	0.0416967	244	0.0424294	271.667	0.0404739	1	0.526605	0.248019	0.125734	-0.0186098	37.2464	0.983553	251	0.0272993	177	0.0246497	196	0.0266047	208	0.0261846	1	0.428303	0.549596	0.25495	-0.0119235	58.1327	0.91237
ENSMUSG00000077148	U6 small nuclear RNA		Gm22935	4	0.0071018	4	0.00652614	12	0.0257712	6.66667	0.013133	1	0.873186	0.615761	0.0705232	-0.0185915	37.283	0.896653	5	0.00669038	3	0.00513761	3	0.00497424	3.66667	0.00560075	1	0.231785	1.92397	0.670825	-0.00277802	249.511	0.0535279
ENSMUSG00000065480	ENSMUSG00000065480		Mir133b	28	0.0435391	15	0.0216741	25	0.0469662	22.6667	0.0373931	1	0.560044	0.367404	0.102059	-0.0185891	37.2878	0.997533	0	-0.000134191	0	-2.44017e-05	0	-8.16879e-05	0	-8.00937e-05	1	-9.63733	1.58851	0.149286	N/A	N/A	N/A
ENSMUSG00000044030	interferon regulatory factor 2 binding protein 1	NM_178757	Irf2bp1	634	0.0427651	766	0.0466739	695	0.0559305	698.333	0.0484565	1	0.7465	0.240399	0.11754	-0.0185828	37.3005	0.973944	2105	0.10783	1458	0.0954765	1717	0.109649	1760	0.104318	1	0.689023	0.363046	0.162844	-0.0153314	45.211	0.996193
ENSMUSG00000091387		NM_001166065		38	0.00136984	26	0.000870939	29	0.00126301	31	0.00116793	1	0.985981	0.211964	0.117309	-0.0185533	37.3598	0.929531	0	-4.22196e-06	0	-9.80542e-07	0	-2.19675e-06	0	-2.46642e-06	1	-6.50939	0.916448	0.171594	N/A	N/A	N/A
ENSMUSG00000050846	zinc finger protein 623	NM_030199	Zfp623	547	0.040713	381	0.0260945	472	0.0423272	466.667	0.0363782	1	0.344856	0.183215	0.164358	-0.0185423	37.382	0.89332	350	0.0195395	227	0.016264	244	0.0170115	273.667	0.017605	1	0.55948	0.218393	0.220925	-0.0153387	45.1894	0.901606
ENSMUSG00000028331	RIKEN cDNA 5830415F09 gene	NM_029086	5830415F09Rik	196	0.00690261	126	0.00402697	143	0.00602326	155	0.00565095	1	0.38858	0.227617	0.143906	-0.0185077	37.4519	0.946151	268	0.00711745	177	0.00601857	227	0.00752506	224	0.00688702	1	0.743082	0.391084	0.167112	-0.0148111	46.7992	0.994155
ENSMUSG00000039384	dual specificity phosphatase 10	NM_022019	Dusp10	178	0.00923685	221	0.0104147	163	0.0100629	187.333	0.00990484	1	0.491563	0.18063	0.15272	-0.0184911	37.4855	0.927942	505	0.0198712	347	0.0174563	431	0.0211482	427.667	0.0194919	1	0.579232	0.361701	0.259535	-0.0126593	54.7539	0.961013
ENSMUSG00000024528	serum response factor binding protein 1; similar to SRF-dependent transcription regulation associated protein	NM_026040	Srfbp1	760	0.0956141	587	0.0675026	580	0.0875943	642.333	0.0835703	1	0.493048	0.336533	0.111897	-0.0184857	37.4965	0.996225	673	0.0636624	571	0.069246	589	0.0696052	611	0.0675045	1	0.649012	0.40214	0.171259	-0.0147818	46.892	0.999809
ENSMUSG00000037904	ankyrin repeat domain 9	NM_175207	Ankrd9	116	0.0020598	86	0.00138082	103	0.00219423	101.667	0.00187828	1	0.404172	0.299423	0.124752	-0.0184816	37.5046	0.977066	202	0.00270936	141	0.0024201	139	0.00232508	160.667	0.00248485	1	0.480826	0.311674	0.136428	-0.0175106	39.5845	0.988396
ENSMUSG00000086359				3	0.000503434	7	0.00108688	5	0.00100206	5	0.000864127	1	1.17826	0.0887441	0.175544	-0.0184753	37.5176	0.723224	26	0.00336464	10	0.00165274	20	0.00322525	18.6667	0.00274754	1	0.314542	0.216442	0.0498199	-0.0257379	26.931	0.987694
ENSMUSG00000031016	WEE 1 homolog 1 (S. pombe)	NM_009516	Wee1	683	0.0645361	601	0.0514731	573	0.0646384	619	0.0602159	1	0.672176	0.251273	0.120131	-0.0184704	37.5275	0.983436	1558	0.111422	956	0.0874401	1189	0.106048	1234.33	0.101637	1	0.608044	0.324192	0.120887	-0.0177809	38.9827	0.999119
ENSMUSG00000036992	NTF2-related export protein 1	NM_019761,NM_001110159	Nxt1	958	0.0847459	710	0.0570955	703	0.0745495	790.333	0.0721303	1	0.459585	0.302392	0.120521	-0.0184654	37.5376	0.989606	1240	0.0826891	929	0.079327	915	0.0761519	1028	0.0793894	1	0.611769	0.381562	0.152756	-0.0157683	43.9583	0.999826
ENSMUSG00000053914	lysine (K)-specific demethylase 4D	NM_173433	Kdm4d	10	0.000381092	8	0.000281715	9	0.000412662	9	0.00035849	1	0.52276	0.4619	0.0947076	-0.0184465	37.5761	0.97848	6	0.000171415	3	0.000109924	6	0.00021437	5	0.000165236	1	0.388921	0.476883	0.166532	-0.0152311	45.5086	0.942215
ENSMUSG00000044763	RNA (guanine-9-) methyltransferase domain containing 1	NM_029092	Trmt10c	954	0.0581874	447	0.0247263	622	0.0454754	674.333	0.0427964	1	0.318583	0.240523	0.14865	-0.0184419	37.5855	0.921922	983	0.0451281	622	0.0365963	764	0.0438054	789.667	0.0418432	1	0.482588	0.289576	0.160672	-0.0166997	41.5065	0.974312
ENSMUSG00000087478				14	0.00101083	14	0.000934624	15	0.00130748	14.3333	0.00108431	1	0.623814	0.131912	0.170381	-0.0184159	37.6385	0.859491	17	0.00092489	6	0.000417369	7	0.00047394	10	0.0006054	1	0.135923	0.239797	0.285497	-0.0156598	44.2628	0.610404
ENSMUSG00000037759	prostaglandin E receptor 2 (subtype EP2)	NM_008964	Ptger2	8	0.000398666	6	0.000277843	4	0.000240307	6	0.000305606	1	0.10893	0.204114	0.213081	-0.0183802	37.7116	0.649489	0	-1.22873e-06	0	-3.12808e-07	1	4.63831e-05	0.333333	1.49472e-05	1	0.112442	0.882506	-0.00280864	N/A	N/A	N/A
ENSMUSG00000021365	neural precursor cell expressed, developmentally down-regulated gene 9	NM_001111324,NM_017464	Nedd9	828	0.0168599	628	0.0113755	744	0.0180428	733.333	0.0154261	1	0.635512	0.294568	0.114466	-0.0183615	37.7501	0.99604	2712	0.0419315	1671	0.0330337	1975	0.0380715	2119.33	0.0376789	1	0.672938	0.420445	0.164835	-0.0148257	46.753	0.999167
ENSMUSG00000000562	adenosine A3 receptor	NM_009631,NM_001174169	Adora3	25	0.00127954	19	0.000903642	13	0.000803862	19	0.000995682	1	0.313719	0.322285	0.130845	-0.0183474	37.779	0.940866	0	-3.94366e-06	0	-1.01736e-06	0	-1.39815e-06	0	-2.11972e-06	1	0.323833	1.39343	0.191393	-0.0112344	61.6984	0.57966
ENSMUSG00000045534	potassium voltage-gated channel, shaker-related subfamily, member 5	NM_145983	Kcna5	127	0.00822646	162	0.00974063	129	0.0100863	139.333	0.00935112	1	0.802825	0.310288	0.105537	-0.0183411	37.792	0.982012	11	0.000511722	11	0.000675149	17	0.00101687	13	0.000734581	1	0.517032	0.244976	0.176606	-0.0165209	41.9558	0.951797
ENSMUSG00000051176	zinc finger protein 42	NM_009556	Zfp42	9	0.000918379	8	0.000757656	21	0.0025899	12.6667	0.00142198	1	0.77554	0.536746	0.0810656	-0.0183312	37.8125	0.938884	4	0.000305127	1	9.75009e-05	2	0.00018739	2.33333	0.000196673	1	-0.00742627	0.707897	-0.00285047	N/A	N/A	N/A
ENSMUSG00000022114	sprouty homolog 2 (Drosophila)	NM_011897	Spry2	892	0.0783329	880	0.0708927	836	0.0880881	869.333	0.0791046	1	0.458346	0.188555	0.156624	-0.0183056	37.8654	0.927404	1021	0.0675342	725	0.061402	962	0.0794306	902.667	0.0694556	1	0.481256	0.293054	0.167011	-0.0164205	42.2123	0.971719
ENSMUSG00000032300	septin 14; RIKEN cDNA 1700017B05 gene	NM_028820	1700017B05Rik	266	0.00981884	339	0.011465	287	0.0126566	297.333	0.0113135	1	0.526345	0.142736	0.174209	-0.0182942	37.889	0.871801	794	0.0222347	387	0.0138506	635	0.022169	605.333	0.0194181	1	0.440392	0.298157	0.147723	-0.0172858	40.0993	0.974623
ENSMUSG00000030823	RIKEN cDNA E430018J23 gene; RIKEN cDNA 9130019O22 gene	NM_030226	9130019O22Rik	68	0.00187982	59	0.00149929	66	0.0021815	64.3333	0.00185354	1	0.319548	0.23033	0.155903	-0.0182721	37.9348	0.913007	116	0.00242188	47	0.0012549	114	0.00296951	92.3333	0.00221543	1	0.332807	0.506197	0.201445	-0.0140807	49.2269	0.88354
ENSMUSG00000090330				30	0.00373899	27	0.00304152	53	0.0079107	36.6667	0.00489707	1	0.520284	0.349238	0.112416	-0.0182533	37.9738	0.997927	70	0.0066044	47	0.00567139	92	0.0108226	69.6667	0.00769946	1	0.618486	0.39867	0.304109	-0.01124	61.6679	0.957585
ENSMUSG00000022528	hairy and enhancer of split 1 (Drosophila)	NM_008235	Hes1	357	0.0226067	402	0.0228497	409	0.0307738	389.333	0.0254101	1	0.452588	0.25871	0.136223	-0.0182075	38.0694	0.974368	2232	0.108258	1052	0.0652003	1567	0.0947262	1617	0.0893948	1	0.356856	0.414875	0.117215	-0.0180396	38.4236	0.956334
ENSMUSG00000050836	netrin G1		Ntng1	8	0.00449669	6	0.00309793	0	-5.2725e-05	4.66667	0.00251397	1	0.10493	0.41214	0.155655	-0.0182027	38.0793	0.671322	4	0.00168274	4	0.00216392	9	0.00475743	5.66667	0.00286803	1	2.06319	0.539414	0.443833	-0.0059675	116.154	0.429949
ENSMUSG00000046010	zinc finger protein 830	NM_025884	Zfp830	495	0.0276106	398	0.0202705	387	0.0259021	426.667	0.0245944	1	0.479006	0.190321	0.15694	-0.0181932	38.0993	0.930403	703	0.0295779	438	0.0235871	476	0.0249855	539	0.0260502	1	0.597697	0.337399	0.203456	-0.014376	48.2156	0.981225
ENSMUSG00000054128	MHC class I antigen; histocompatibility 2, T region locus 18; hypothetical protein LOC100044192; histocompatibility 2, T region locus 3; similar to histocompatibility 2, T region locus 3; similar to H-2 class I histocompatibility antigen, TLA(C) alpha chain precursor	NM_008208	H2-T3	0	-6.40905e-07	0	-5.44863e-06	0	-1.93511e-06	0	-2.67488e-06	1	0.882485	0.154171	0.150095	-0.0181751	38.1371	0.87835	18	0.000180136	23	0.00029405	14	0.000174607	18.3333	0.000216264	1	0.584924	0.784655	0.427981	-0.00700952	98.8865	0.870595
ENSMUSG00000034607	premature ovarian failure 1B	NM_181579	Pof1b	2	1.71572e-05	2	-0.000248573	6	0.000164102	3.33333	-2.24382e-05	1	4.8234	0.0599698	0.157763	-0.0181603	38.1683	0.451543	611	0.0218363	398	0.0181714	364	0.0162119	457.667	0.0187399	1	1.05687	1.0411	1.13582	0.00102427	>Capzb	0.948681
ENSMUSG00000024675	membrane-spanning 4-domains, subfamily A, member 4C	NM_029499	Ms4a4c	15	0.000999018	7	0.00043322	7	0.000563253	9.66667	0.000665164	1	0.406673	0.349909	0.121499	-0.018145	38.2006	0.97913	0	-3.07906e-06	0	-4.87739e-07	0	-9.79662e-07	0	-1.51549e-06	1	0.419783	1.51287	0.177722	-0.011032	62.8307	0.588406
ENSMUSG00000020037	regulatory factor X, 4 (influences HLA class II expression)	NM_027689,NM_001024918	Rfx4	5	7.5369e-05	4	5.60588e-05	23	0.000418933	10.6667	0.000183454	1	0.347817	0.458575	0.110713	-0.0181248	38.2431	0.945493	1	1.11332e-05	0	-6.31136e-08	1	1.34355e-05	0.666667	8.16854e-06	1	1.18676	-164.089	2.0968	N/A	N/A	N/A
ENSMUSG00000018381	ABI gene family, member 3	NM_025659,NM_001163464	Abi3	9	0.000241077	11	0.0002738	8	0.000258897	9.33333	0.000257925	1	0.774615	0.334004	0.106311	-0.0181177	38.2581	0.98607	0	-7.4302e-07	0	-3.08257e-07	0	-4.50297e-07	0	-5.00525e-07	1	0.799587	1.4441	0.155507	-0.0110047	62.9865	0.627316
ENSMUSG00000065392	ENSMUSG00000065392		Gm25894	57	0.140729	36	0.0804261	30	0.0885026	41	0.103219	1	0.888542	0.487685	0.0851379	-0.0181084	38.2777	0.939258	91	0.169604	57	0.135973	53	0.123265	67	0.142948	1	0.306973	0.568884	0.226232	-0.0131015	52.9061	0.827231
ENSMUSG00000045538	DEAD (Asp-Glu-Ala-Asp) box polypeptide 28	NM_028038	Ddx28	265	0.0258797	232	0.0205477	235	0.02751	244	0.0246458	1	0.473175	0.281501	0.131508	-0.0180925	38.3113	0.984772	465	0.0343036	346	0.0326606	341	0.0313755	384	0.0327799	1	0.364502	0.187044	0.0964959	-0.0217699	31.8396	0.96353
ENSMUSG00000039754	alkB, alkylation repair homolog 4 (E. coli)	NM_028070	Alkbh4	264	0.00845431	221	0.00647304	236	0.00907865	240.333	0.008002	1	0.451409	0.354613	0.119	-0.0180688	38.3615	0.989102	338	0.00815892	220	0.00679859	250	0.00752893	269.333	0.00749548	1	0.456832	0.339977	0.315865	-0.0119857	57.8314	0.87418
ENSMUSG00000064032	ENSMUSG00000064032		Gm10143	12	0.000336041	10	0.000257875	14	0.000471683	12	0.0003552	1	0.216858	0.123032	0.244457	-0.0180222	38.4607	0.704697	20	0.000422919	7	0.00018927	14	0.000369025	13.6667	0.000327071	1	0.292628	0.412322	0.213674	-0.0145619	47.6002	0.856937
ENSMUSG00000051457	sialophorin	NM_009259,NM_001037810	Spn	18	0.000559978	11	0.000317995	21	0.000789299	16.6667	0.000555757	1	0.629375	0.668008	0.0809991	-0.0179733	38.5653	0.912091	0	-1.7259e-06	0	-3.58013e-07	0	-1.37282e-06	0	-1.15225e-06	1	0.649665	2.8882	0.118481	-0.0108604	63.8235	0.380369
ENSMUSG00000047123	toll-like receptor adaptor molecule 1	NM_174989	Ticam1	224	0.0137053	267	0.0150569	213	0.0156553	234.667	0.0148058	1	0.593905	0.244844	0.136401	-0.0179427	38.6311	0.978218	248	0.0114265	154	0.00908108	214	0.0123061	205.333	0.0109379	1	0.688976	0.444173	0.177278	-0.014152	48.9787	0.998647
ENSMUSG00000034028	CD226 antigen	NM_001039149,NM_178687	Cd226	2	0.000112741	4	0.000209527	6	0.000408627	4	0.000243632	1	1.30716	0.153085	0.141748	-0.0179373	38.6429	0.820542	0	-3.47478e-07	0	-2.35896e-07	0	-7.10722e-07	0	-4.31365e-07	1	1.3493	0.661879	0.207342	-0.0108243	64.0363	0.809484
ENSMUSG00000071540	RIKEN cDNA 3425401B19 gene	NM_001195097	3425401B19Rik	20	0.000662047	33	0.00101449	14	0.0005599	22.3333	0.000745479	1	0.871442	0.259932	0.121499	-0.0178789	38.7691	0.962431	0	-2.04049e-06	1	3.07257e-05	0	-9.73829e-07	0.333333	9.23713e-06	1	0.899536	-0.0417764	0.177722	N/A	N/A	N/A
ENSMUSG00000029254	signal transducing adaptor family member 1; similar to stem cell adaptor protein STAP-1	NM_019992	Stap1	12	0.000288879	15	0.000335548	9	0.000261758	12	0.000295395	1	0.798822	0.44905	0.0944989	-0.017877	38.7731	0.965335	0	-8.90351e-07	0	-3.77775e-07	0	-4.55274e-07	0	-5.74467e-07	1	0.824574	1.94151	0.138228	-0.0107641	64.3946	0.498458
ENSMUSG00000017764	zinc finger, SWIM domain containing 1	NM_028028	Zswim1	55	0.0028062	113	0.00525799	66	0.00399437	78	0.00401952	1	0.584909	0.188332	0.157809	-0.0178744	38.7788	0.931271	258	0.0100376	182	0.00904762	234	0.0113485	224.667	0.0101446	1	0.457835	0.285235	0.153589	-0.0171175	40.4934	0.972601
ENSMUSG00000058093	expressed sequence AA987161	NM_001163246	AA987161	466	0.013568	222	0.00585794	355	0.0124072	347.667	0.010611	1	0.410015	0.27027	0.144178	-0.0178652	38.7988	0.964003	605	0.0132791	325	0.00913499	408	0.0111738	446	0.011196	1	0.537907	0.383698	0.286518	-0.0119614	57.9487	0.94403
ENSMUSG00000030244	glycogen synthase 2	NM_145572	Gys2	0	-1.33324e-06	0	-6.65286e-06	0	-7.76348e-06	0	-5.24986e-06	1	1.54435	0.212756	0.116741	-0.01786	38.81	0.83767	8	0.000374727	6	0.000359039	12	0.000700507	8.66667	0.000478091	1	1.02362	1.08282	0.332874	-0.0066944	103.541	0.69606
ENSMUSG00000048550	threonine synthase-like 1 (bacterial)	NM_001001297,NM_177588	Thnsl1	159	0.00347173	96	0.00189662	143	0.00375664	132.667	0.00304167	1	0.475024	0.333384	0.125259	-0.0178584	38.8135	0.992007	165	0.00271186	145	0.00305435	115	0.00235826	141.667	0.00270815	1	0.745447	0.277984	0.20848	-0.0144854	47.8514	0.947936
ENSMUSG00000009772	NUAK family, SNF1-like kinase, 2	NM_001195025,NM_028778	Nuak2	9	0.000220368	5	0.000109481	8	0.000232669	7.33333	0.000187506	1	0.094649	0.250051	0.216532	-0.0178569	38.8168	0.613683	16	0.000295964	11	0.000260413	20	0.000461707	15.6667	0.000339361	1	0.36619	0.656057	0.0996732	-0.0175731	39.4437	0.8974
ENSMUSG00000065782	ENSMUSG00000065782; ENSMUSG00000077413		Gm22680	78	0.20937	40	0.0963969	30	0.0950759	49.3333	0.133614	1	0.672031	0.332074	0.1152	-0.0178517	38.828	0.996623	152	0.308435	81	0.210305	97	0.245646	110	0.254795	1	0.229921	0.302429	0.144116	-0.0184292	37.6114	0.874101
ENSMUSG00000053916	N-acetylneuraminic acid phosphatase	NM_026086	Nanp	5	0.000517225	3	0.00028175	5	0.000620092	4.33333	0.000473022	1	0.347616	0.207612	0.171875	-0.0178488	38.8343	0.900157	5	0.000389228	4	0.000399103	6	0.000583392	5	0.000457241	1	0.468383	0.360516	-0.000464783	N/A	N/A	N/A
ENSMUSG00000077192	ENSMUSG00000077344; ENSMUSG00000077655; ENSMUSG00000077343; ENSMUSG00000077342; ENSMUSG00000077546; ENSMUSG00000077340; ENSMUSG00000077659; ENSMUSG00000077545; ENSMUSG00000077243; ENSMUSG00000077448; ENSMUSG00000077759; ENSMUSG00000077447; ENSMUSG00000077241; ENSMUSG00000077758; ENSMUSG00000077240; ENSMUSG00000077246; ENSMUSG00000077245; ENSMUSG00000077244; ENSMUSG00000077752; ENSMUSG00000077441;…		Snora17	13	0.0181072	18	0.0230031	25	0.0412412	18.6667	0.0274505	1	0.401528	0.310283	0.136371	-0.0178135	38.9113	0.971753	27	0.0284432	17	0.0228973	73	0.0959547	39	0.0490984	1	0.346486	0.423601	0.355794	-0.0109706	63.1825	0.776564
ENSMUSG00000039628	heparan sulfate (glucosamine) 3-O-sulfotransferase 6	NM_001012402	Hs3st6	34	0.00511807	21	0.00290178	26	0.00471087	27	0.00424357	1	0.434876	0.58774	0.0973732	-0.0177975	38.9462	0.935259	20	0.00225658	15	0.00217393	16	0.00225733	17	0.00222928	1	0.644772	1.29753	0.688535	-0.0022392	309.551	0.237087
ENSMUSG00000034429	zinc finger protein 707	NM_001081065	Zfp707	156	0.00307661	164	0.00296601	165	0.00390217	161.667	0.00331493	1	0.534935	0.275983	0.134942	-0.0177969	38.9476	0.987749	267	0.003977	151	0.00287682	230	0.00427287	216	0.0037089	1	0.547668	0.419804	0.16494	-0.0151535	45.7417	0.994565
ENSMUSG00000037001	zinc finger protein 39	NM_011758	Zfp39	280	0.0131909	180	0.00780033	253	0.0143061	237.667	0.0117658	1	0.295618	0.257674	0.162249	-0.0177862	38.9711	0.901605	263	0.0093199	118	0.00535645	265	0.0117293	215.333	0.0088019	1	0.20864	0.286175	0.180765	-0.0173201	40.0197	0.816105
ENSMUSG00000025184	DNA segment, Chr 19, ERATO Doi 386, expressed	NM_177464	R3hcc1l	961	0.0184321	523	0.00918066	760	0.0175519	748	0.0150549	1	0.458947	0.337162	0.127767	-0.0177514	39.0474	0.988971	729	0.0105016	466	0.00861184	476	0.00856117	557	0.00922486	1	0.566968	0.331708	0.262515	-0.0128956	53.7506	0.94428
ENSMUSG00000085795		NM_001110508,NM_001101502		547	0.0152455	689	0.0171227	624	0.0205153	620	0.0176278	1	0.513063	0.239437	0.147583	-0.0177456	39.0602	0.967811	3544	0.0757049	2050	0.0559584	2940	0.0782801	2844.67	0.0699811	1	0.519556	0.393822	0.202438	-0.0141393	49.0226	0.981804
ENSMUSG00000053175	B-cell leukemia/lymphoma 3	NM_033601	Bcl3	13	0.000446757	16	0.000495313	17	0.000695632	15.3333	0.0005459	1	0.936281	0.393467	0.100136	-0.0176766	39.2127	0.957135	81	0.00213198	39	0.00131165	61	0.002001	60.3333	0.00181488	1	0.707514	0.832574	0.278387	-0.00924989	74.9357	0.904177
ENSMUSG00000073876	interleukin 11 receptor, alpha chain 2; predicted gene 13305; predicted gene, 100038993	NM_001100596,NM_001099348	Gm13305	385	0.0101614	9	0.00021979	345	0.0110008	246.333	0.00712733	1	0.452651	0.68299	0.0912055	-0.0176726	39.2216	0.907026	1	-1.14286e-05	2	5.05706e-05	1	5.65364e-06	1.33333	1.49319e-05	1	-6.86331	0.348259	3.92681	N/A	N/A	N/A
ENSMUSG00000055480	zinc finger protein 458	NM_001001152	Zfp458	141	0.00740803	67	0.00319341	116	0.00732166	108	0.00597437	1	0.36916	0.241274	0.161896	-0.0176561	39.2581	0.930793	126	0.00497785	91	0.00461023	108	0.00532903	108.333	0.00497237	1	0.707107	0.51522	0.249689	-0.0114652	60.4568	0.999695
ENSMUSG00000074885	ENSMUSG00000074885		Gm10782	0	-1.38257e-05	0	-6.13247e-05	0	-7.60349e-05	0	-5.03951e-05	1	1.02957	0.248215	0.123608	-0.0176513	39.2688	0.932732	12	0.00388593	8	0.00330955	17	0.0068607	12.3333	0.00468539	1	0.682411	1.26329	0.352455	-0.00648572	106.873	0.617184
ENSMUSG00000032443	zinc finger, CW type with PWWP domain 2; similar to Zinc finger, CW type with PWWP domain 2		Zcwpw2	10	0.00122389	9	0.00102001	13	0.00191615	10.6667	0.00138668	1	0.435598	0.341343	0.131134	-0.01763	39.3163	0.983485	3	0.000273143	2	0.000234691	6	0.000686873	3.66667	0.000398235	1	0.389123	0.355487	0.166316	-0.0161712	42.863	0.95442
ENSMUSG00000044147	ADP-ribosylation factor 6	NM_007481	Arf6	2428	0.118717	1757	0.0771899	2061	0.120494	2082	0.105467	1	0.655771	0.301696	0.126065	-0.0176229	39.3321	0.994379	5952	0.220396	3608	0.170871	4023	0.185748	4527.67	0.192338	1	0.611936	0.290399	0.114852	-0.0184453	37.5785	0.996413
ENSMUSG00000032908	sphingosine-1-phosphate phosphotase 2	NM_001004173	Sgpp2	10	0.000458164	3	0.000124822	5	0.000272803	6	0.000285263	1	0.431315	0.204818	0.17001	-0.0176187	39.3416	0.922325	11	0.000379505	4	0.000176813	10	0.000431084	8.33333	0.000329134	1	1.27928	0.902369	0.499592	-0.0043413	159.664	0.644364
ENSMUSG00000037845	ferredoxin-fold anticodon binding domain containing 1	NM_198675	Fdxacb1	126	0.00275799	61	0.00121949	103	0.0027143	96.6667	0.00223059	1	0.303187	0.285529	0.15727	-0.0176181	39.3429	0.914215	99	0.00162796	61	0.00128676	67	0.0013755	75.6667	0.00143007	1	0.556645	0.271159	0.253465	-0.0137874	50.274	0.914138
ENSMUSG00000018347	zinc finger with KRAB and SCAN domains 6	NM_026107	Zkscan6	296	0.0118766	248	0.00910453	239	0.0114999	261	0.010827	1	0.587017	0.292612	0.131864	-0.0176102	39.3605	0.993674	387	0.0117061	243	0.00940919	302	0.0114	310.667	0.0108384	1	0.728889	0.480402	0.32429	-0.00997931	69.4584	0.987701
ENSMUSG00000027196	RIKEN cDNA 4921507L20 gene		4921507L20Rik	28	0.00165645	33	0.00179442	28	0.001976	29.6667	0.00180896	1	0.431247	0.129965	0.213956	-0.0176031	39.3763	0.807945	39	0.00174009	25	0.00142713	53	0.00295224	39	0.00203982	1	1.08172	0.635362	0.376917	-0.00751031	92.2928	0.9159
ENSMUSG00000027079	CLP1, cleavage and polyadenylation factor I subunit, homolog (S. cerevisiae)	NM_133840	Clp1	683	0.0220219	411	0.0121061	494	0.0191394	529.333	0.0177558	1	0.407046	0.312948	0.139954	-0.0176001	39.3832	0.971802	705	0.0171096	420	0.0130595	468	0.0141775	531	0.0147822	1	0.568082	0.413244	0.224098	-0.0131994	52.5136	0.986536
ENSMUSG00000033033	calcium homeostasis modulator 2	NM_133746	Calhm2	92	0.00288829	104	0.00301336	81	0.00305237	92.3333	0.00298467	1	0.79512	0.201214	0.147801	-0.017593	39.3991	0.931687	103	0.00243525	53	0.00160328	89	0.00262668	81.6667	0.00222174	1	0.646754	0.489533	0.179455	-0.0138662	49.9882	0.995305
ENSMUSG00000092083		NM_001098528		22	0.000478898	37	0.000748108	28	0.000734789	29	0.000653932	1	0.792703	0.298131	0.12162	-0.0175876	39.4112	0.981327	5	8.05948e-05	2	4.10959e-05	9	0.000182826	5.33333	0.000101506	1	-0.0149855	0.341922	0.222226	N/A	N/A	N/A
ENSMUSG00000061654	sprouty homolog 3 (Drosophila)	NM_001030293	Spry3	80	0.00335947	51	0.00194767	80	0.00403532	70.3333	0.00311415	1	0.706821	0.416423	0.106336	-0.0175614	39.47	0.98616	153	0.00485639	70	0.00284231	101	0.00399677	108	0.00389849	1	0.626755	0.535282	0.296871	-0.0104364	66.4161	0.987912
ENSMUSG00000085337				11	0.00072685	17	0.00101494	20	0.00158083	16	0.00110754	1	0.795897	0.149009	0.172685	-0.017557	39.4797	0.861704	50	0.00251823	35	0.00225279	51	0.00320118	45.3333	0.0026574	1	0.327116	0.123488	0.156566	-0.020187	34.3364	0.849935
ENSMUSG00000094441		NM_029952		490	0.0548813	222	0.0227023	392	0.0526767	368	0.0434201	1	0.368775	0.273707	0.15461	-0.0175498	39.4961	0.945122	472	0.0397726	231	0.0249467	432	0.045467	378.333	0.0367288	1	0.538498	0.527461	0.270552	-0.0113135	61.2674	0.967129
ENSMUSG00000041544	patched domain containing 2	NM_001083342	Ptchd2	4	0.000116776	5	0.000133485	13	0.00045915	7.33333	0.00023647	1	0.871999	0.24862	0.130873	-0.0175472	39.5018	0.955379	5	0.000110011	5	0.000140849	3	8.17308e-05	4.33333	0.000110864	1	0.466522	0.287915	0.33426	-0.0121206	57.1875	0.833198
ENSMUSG00000095315				19	0.0116054	18	0.00995787	20	0.0147004	19	0.0120879	1	0.641116	0.311229	0.126704	-0.0175279	39.5453	0.996334	33	0.0152251	28	0.0165307	20	0.0115009	27	0.0144189	1	0.566973	0.721461	0.650142	-0.00467088	148.398	0.671608
ENSMUSG00000091177				2	0.000814024	2	0.000759479	6	0.00295381	3.33333	0.00150911	1	0.437481	0.304809	0.141148	-0.0175153	39.5738	0.978026	3	0.000921363	0	-8.55056e-07	2	0.000762441	1.66667	0.000560983	1	-0.00122967	-330.825	1.00397	N/A	N/A	N/A
ENSMUSG00000092730				52	0.0737728	33	0.0422469	21	0.0355101	35.3333	0.0505099	1	0.317866	0.266417	0.16361	-0.017512	39.5812	0.914183	50	0.0533667	54	0.0738962	39	0.0520354	47.6667	0.0597661	1	0.35105	0.280172	0.17917	-0.0166178	41.7112	0.92032
ENSMUSG00000001656	homeo box C11	NM_001024842	Hoxc11	6	0.000545279	3	0.000253348	11	0.00120777	6.66667	0.000668798	1	0.435721	1.02057	0.0773173	-0.017507	39.5927	0.799733	0	-1.6806e-06	0	-2.8523e-07	0	-2.10066e-06	0	-1.3555e-06	1	0.449768	4.41253	0.113096	-0.010394	66.6873	0.268937
ENSMUSG00000045252	zinc finger protein 574	NM_175477,NM_001168506	Zfp574	334	0.0073093	382	0.00767346	315	0.00823652	343.667	0.00773976	1	0.38272	0.155414	0.204989	-0.0174968	39.6157	0.838569	794	0.0131558	368	0.00779412	634	0.0130996	598.667	0.0113498	1	0.338775	0.370417	0.174703	-0.0159482	43.4625	0.924123
ENSMUSG00000043572	prolyl-tRNA synthetase (mitochondrial)(putative)	NM_172272,NM_001083887	Pars2	187	0.00535055	154	0.00397813	199	0.00681265	180	0.00538044	1	0.474128	0.290137	0.142332	-0.0174912	39.6284	0.981881	411	0.00889804	274	0.00758773	358	0.00966518	347.667	0.00871698	1	0.449646	0.310328	0.167319	-0.0163349	42.4336	0.96898
ENSMUSG00000027787	NMD3 homolog (S. cerevisiae)	NM_133787	Nmd3	2144	0.0721484	1243	0.0380069	1480	0.0597841	1622.33	0.0566465	1	0.490913	0.352394	0.128406	-0.0174726	39.6705	0.993618	2137	0.0541154	1605	0.0520927	1561	0.0493616	1767.67	0.0518566	1	0.649828	0.444389	0.285529	-0.0112172	61.7935	0.984854
ENSMUSG00000031603	fibroblast growth factor 20	NM_030610	Fgf20	0	-4.4485e-05	2	-6.9727e-05	0	-0.000104915	0.666667	-7.30422e-05	1	0.863507	0.271899	0.127072	-0.0174657	39.6861	0.965166	186	0.0125032	148	0.0127095	113	0.00946655	149	0.0115597	1	0.572345	0.409723	0.362332	-0.010164	68.1961	0.913177
ENSMUSG00000027628	RIKEN cDNA 0610011L14 gene	NM_001164818,NM_026661	Aar2	656	0.0149157	722	0.0149805	554	0.0150671	644	0.0149878	1	0.659991	0.264792	0.137833	-0.0174603	39.6984	0.982324	1237	0.0212572	863	0.0189697	962	0.0206206	1020.67	0.0202825	1	0.642051	0.366524	0.163969	-0.0153695	45.0989	0.998148
ENSMUSG00000002633	sonic hedgehog	NM_009170	Shh	0	-4.93978e-06	0	-1.70416e-05	0	-4.97163e-06	0	-8.98434e-06	1	0.719062	0.121575	0.200127	-0.0174277	39.7727	0.80427	27	0.0013884	14	0.000919696	7	0.000448595	16	0.000918897	1	0.476605	0.618756	0.570642	-0.00626211	110.689	0.677255
ENSMUSG00000045319	RIKEN cDNA 5430407P10 gene	NM_001159657,NM_144883	Proser2	46	0.00167042	57	0.00179498	47	0.00201334	50	0.00182625	1	0.498721	0.356371	0.128254	-0.0174194	39.7916	0.994539	339	0.00945871	253	0.00902096	234	0.00813766	275.333	0.00887244	1	0.759322	0.419184	0.260359	-0.0117413	59.0351	0.985949
ENSMUSG00000032469	debranching enzyme homolog 1 (S. cerevisiae)	NM_031403	Dbr1	444	0.0152121	438	0.0136261	407	0.0166652	429.667	0.0151678	1	0.720549	0.353445	0.117483	-0.0174185	39.7937	0.992969	911	0.0236044	644	0.0213437	767	0.0247871	774	0.0232451	1	0.685609	0.584452	0.253986	-0.0110056	62.9814	0.991379
ENSMUSG00000048826	dapper homolog 2, antagonist of beta-catenin (xenopus)	NM_172826	Dact2	12	0.000759106	19	0.0011028	16	0.00119683	15.6667	0.00101958	1	0.431146	0.232592	0.164954	-0.0174073	39.8194	0.941555	149	0.00734525	45	0.00283362	100	0.00614347	98	0.00544078	1	0.37684	0.400782	0.179733	-0.0153488	45.1597	0.940533
ENSMUSG00000086740				24	0.000706818	14	0.000376602	24	0.000847475	20.6667	0.000643632	1	0.141012	0.355073	0.176637	-0.0174038	39.8273	0.723268	32	0.000710568	15	0.000426389	31	0.000859022	26	0.000665326	1	0.879624	0.528382	0.644941	-0.00501352	138.256	0.771475
ENSMUSG00000037386	regulating synaptic membrane exocytosis 2	NM_001256383,NM_001256382,NM_053271	Rims2	4	7.62436e-05	10	0.000170457	8	0.000181517	7.33333	0.000142739	1	0.625014	0.119641	0.209744	-0.0174031	39.8289	0.79852	25	0.000364986	28	0.000522367	29	0.000527663	27.3333	0.000471672	1	1.54477	0.876706	0.861222	-0.000676041	1025.3	0.0377611
ENSMUSG00000023882	hypothetical protein LOC100044271; zinc finger protein 54	NM_011760	Zfp54	132	0.00406503	56	0.00156199	88	0.00324438	92	0.00295713	1	0.341844	0.335276	0.145751	-0.0174007	39.8345	0.945054	142	0.00329243	82	0.00243634	122	0.00353302	115.333	0.00308726	1	0.560994	0.395396	0.22922	-0.013216	52.4476	0.98101
ENSMUSG00000056306	RIKEN cDNA 6030405A18 gene	NM_177854	Sertm1	27	0.000828865	26	0.000741689	29	0.00107558	27.3333	0.000882044	1	0.645338	0.37672	0.117309	-0.0174004	39.8351	0.997443	0	-2.55464e-06	0	-8.35028e-07	0	-1.87074e-06	0	-1.75347e-06	1	-9.92764	-23.9206	0.171594	N/A	N/A	N/A
ENSMUSG00000075265	predicted gene 10818		Gm10818	14	0.00183523	24	0.002873	18	0.00281225	18.6667	0.00250683	1	1.24601	0.181396	0.143599	-0.0173923	39.8538	0.849628	40	0.00397628	31	0.00393913	44	0.00545381	38.3333	0.00445641	1	0.730361	0.348942	0.158827	-0.0155233	44.6521	0.991678
ENSMUSG00000065281	ENSMUSG00000065281		Gm24452	125	0.321924	81	0.189308	74	0.228223	93.3333	0.246485	1	0.655012	0.385765	0.115693	-0.0173896	39.86	0.996012	161	0.312556	113	0.280924	105	0.254444	126.333	0.282641	1	0.493516	0.484618	0.152146	-0.0153756	45.0809	0.977963
ENSMUSG00000056023	ENSMUSG00000056023		Gm9989	0	-4.6194e-07	0	-4.09791e-06	0	-1.79326e-06	0	-2.1177e-06	1	1.17665	0.0709186	0.233482	-0.0173784	39.8856	0.624164	3	0.000129835	4	0.000221155	3	0.000161807	3.33333	0.000170932	1	0.779899	0.360941	0.665749	-0.00621277	111.568	0.576341
ENSMUSG00000039810	zinc finger CCCH type containing 10	NM_134003	Zc3h10	216	0.00654809	245	0.00678357	195	0.00706076	218.667	0.00679747	1	0.457683	0.235835	0.162558	-0.0173614	39.9245	0.949745	434	0.00994832	286	0.0083844	378	0.0108079	366	0.00971354	1	0.579747	0.428554	0.261574	-0.0120698	57.428	0.978603
ENSMUSG00000039942	prostaglandin E receptor 4 (subtype EP4)	NM_001136079,NM_008965	Ptger4	27	0.000472743	56	0.000885921	46	0.000962189	43	0.000773618	1	0.935838	0.350856	0.111572	-0.0173546	39.9402	0.963007	136	0.00181757	119	0.00203233	131	0.00218193	128.667	0.00201061	1	0.627658	0.302717	0.244003	-0.0134889	51.3867	0.946145
ENSMUSG00000090625				3	0.0003722	5	0.000572872	5	0.000752204	4.33333	0.000565759	1	1.46023	0.12059	0.170392	-0.0173504	39.9499	0.734162	6	0.000562848	3	0.000359607	1	0.000115837	3.33333	0.000346097	1	-0.00307209	1.44542	-0.00281499	N/A	N/A	N/A
ENSMUSG00000040164	K+ voltage-gated channel, subfamily S, 1	NM_008435	Kcns1	6	0.000406543	7	0.000440739	4	0.000327445	5.66667	0.000391576	1	1.16192	0.0870883	0.212623	-0.0173405	39.9727	0.678401	0	-1.253e-06	0	-4.96204e-07	0	-5.69523e-07	0	-7.72909e-07	1	1.19938	-94.5214	0.311013	N/A	N/A	N/A
ENSMUSG00000022787	WD repeat domain 53	NM_001185162,NM_026898	Wdr53	329	0.0152968	224	0.0094679	231	0.0128819	261.333	0.0125488	1	0.477962	0.244665	0.158761	-0.017326	40.0062	0.959355	385	0.0134849	289	0.012966	278	0.0121549	317.333	0.0128686	1	0.626404	0.401618	0.330664	-0.0106649	64.9934	0.94463
ENSMUSG00000095841				3	0.00143699	2	0.000891068	6	0.00351575	3.66667	0.00194794	1	0.560409	0.308484	0.135901	-0.0173247	40.0092	0.994897	44	0.0165282	4	0.00191904	19	0.00889091	22.3333	0.00911271	1	0.717894	1.26326	0.999183	0.000210618	>Capzb	0.00509785
ENSMUSG00000035455	fidgetin-like 1	NM_021891,NM_001163360,NM_001163359	Fignl1	1735	0.0213641	1014	0.0112938	1341	0.0198019	1363.33	0.0174866	1	0.435092	0.316092	0.143185	-0.0173177	40.0255	0.977824	2263	0.021007	1585	0.0188424	1694	0.0196243	1847.33	0.0198246	1	0.646277	0.437514	0.281323	-0.0113696	60.9651	0.984202
ENSMUSG00000090459				13	0.00611296	6	0.00259621	11	0.00620968	10	0.00497295	1	0.601162	0.101081	0.233599	-0.0173161	40.029	0.743131	15	0.00531302	4	0.00181346	12	0.00530502	10.3333	0.00414383	1	0.858725	0.903106	0.166082	-0.0119639	57.9367	0.830694
ENSMUSG00000028128	coagulation factor III	NM_010171	F3	113	0.0109724	80	0.00687766	77	0.0088349	90	0.008895	1	0.453819	0.253957	0.158464	-0.0173018	40.0621	0.959512	438	0.0323531	238	0.0224742	287	0.0264318	321	0.0270864	1	0.86845	1.17081	1.09308	0.000841829	>Capzb	0.254236
ENSMUSG00000038782	RIKEN cDNA 1700028J19 gene		1700028J19Rik	15	0.00221404	15	0.00204934	15	0.00266776	15	0.00231038	1	0.697321	0.409212	0.112168	-0.0172993	40.0679	0.989766	14	0.00155432	5	0.000709965	9	0.00124608	9.33333	0.00117012	1	0.416474	1.29786	1.00174	-0.000551641	1256.52	0.00688601
ENSMUSG00000020484	X-box binding protein 1	NM_013842	Xbp1	3212	0.115484	2825	0.0937656	2937	0.127282	2991.33	0.112177	1	0.573123	0.344742	0.128452	-0.0172942	40.0797	0.999521	1497	0.0402551	1145	0.039576	1215	0.0408558	1285.67	0.040229	1	0.604176	0.411978	0.231193	-0.0129134	53.6764	0.989529
ENSMUSG00000065434	ENSMUSG00000065434		Mir7-1	8	0.013714	1	0.00150171	10	0.0206285	6.33333	0.0119481	1	0.217934	1.29663	0.0848109	-0.0172593	40.1608	0.664191	1	0.00125	3	0.00495093	5	0.00801652	3	0.00473915	1	-0.00760682	0.238796	0.400686	N/A	N/A	N/A
ENSMUSG00000095313				25	0.00530567	3	0.000585125	17	0.00434912	15	0.0034133	1	0.276906	0.20676	0.200217	-0.0172538	40.1736	0.837255	17	0.00270745	2	0.000408712	8	0.00158985	9	0.00156867	1	0.898261	-0.00144086	0.500299	N/A	N/A	N/A
ENSMUSG00000070997	RIKEN cDNA 1700055D18 gene		1700055D18Rik	6	0.000695084	6	0.000639502	10	0.00138366	7.33333	0.000906083	1	0.722731	0.721903	0.084688	-0.0172247	40.2414	0.889154	21	0.00184855	6	0.000674781	24	0.00263348	17	0.00171894	1	0.724162	1.68286	0.291421	-0.0066884	103.634	0.446088
ENSMUSG00000011427	zinc finger protein 790	NM_146185,NM_001145880	Zfp790	845	0.0172881	438	0.00820044	642	0.0157895	641.667	0.0137594	1	0.415611	0.232215	0.171679	-0.017217	40.2595	0.932516	645	0.00991163	393	0.00774729	525	0.0100808	521	0.00924657	1	0.610375	0.31328	0.170976	-0.0156824	44.199	0.986797
ENSMUSG00000065431	ENSMUSG00000065431		Mir186	24	0.0626847	8	0.0186911	24	0.0748042	18.6667	0.05206	1	0.834171	0.23549	0.143512	-0.0172045	40.2887	0.949341	32	0.0630172	17	0.0428781	44	0.108186	31	0.0713605	1	0.730752	0.466831	0.0906415	-0.0181597	38.1695	0.967405
ENSMUSG00000074194	zinc finger protein 791	NM_001037745	Zfp791	55	0.00635612	29	0.00305325	35	0.00482533	39.6667	0.0047449	1	0.251764	0.146695	0.245774	-0.0171927	40.3162	0.739384	61	0.00530867	34	0.00379055	63	0.00684963	52.6667	0.00531628	1	0.557247	0.998229	0.190008	-0.0114778	60.39	0.803243
ENSMUSG00000056552	RIKEN cDNA E130120F12 gene	NM_001038651		91	0.00299886	42	0.00123731	69	0.00271081	67.3333	0.00231566	1	0.245734	0.179015	0.224011	-0.0171878	40.3278	0.779006	176	0.00438433	94	0.00299635	147	0.00456854	139	0.00398307	1	0.578958	0.429899	0.305681	-0.0110727	62.5998	0.959073
ENSMUSG00000055652	kelch-like 25 (Drosophila)	NM_182782,NM_001122780,NM_029652	Klhl25	514	0.0139044	485	0.011993	499	0.0161813	499.333	0.0140262	1	0.591953	0.213728	0.164621	-0.0171855	40.3333	0.944375	845	0.0172592	521	0.0136147	705	0.0179619	690.333	0.0162786	1	0.609143	0.376334	0.23513	-0.0130805	52.9908	0.98101
ENSMUSG00000055305	zinc finger protein 93; predicted gene 11677	NM_009567	Zfp93	213	0.00770308	145	0.00475669	215	0.00934081	191	0.00726686	1	0.472488	0.284586	0.150983	-0.0171834	40.3383	0.976346	323	0.00881499	210	0.00733586	242	0.00823663	258.333	0.00812916	1	0.655997	0.374068	0.235243	-0.012979	53.4053	0.982998
ENSMUSG00000021070	bradykinin receptor, beta 2	NM_009747	Bdkrb2	13	0.00132938	21	0.00178963	21	0.00251859	18.3333	0.0018792	1	0.770319	0.362558	0.11887	-0.0171571	40.4	0.987638	317	0.0261333	177	0.0186419	226	0.0232184	240	0.0226646	1	0.856171	0.530085	0.419826	-0.00777204	89.1848	0.967286
ENSMUSG00000044006	cartilage intermediate layer protein 2	NM_026818	Cilp2	38	0.00161696	36	0.00141484	31	0.00158351	35	0.00153844	1	0.595845	0.307254	0.137761	-0.0171538	40.4079	0.994888	20	0.00063725	14	0.000572724	28	0.00111777	20.6667	0.000775916	1	0.584685	0.823611	0.17827	-0.0124169	55.8231	0.883173
ENSMUSG00000052763	Zinc finger protein 212	NM_001145881,NM_145576	Zfp212	573	0.0298133	514	0.024433	547	0.0341502	544.667	0.0294655	1	0.585685	0.211223	0.167076	-0.0171458	40.4265	0.94088	881	0.0345944	559	0.0280886	693	0.0339436	711	0.0322089	1	0.606836	0.40629	0.291169	-0.0114861	60.3464	0.965308
ENSMUSG00000089798		NM_182745,NM_175241		25	0.000351102	18	0.000232272	21	0.000354197	21.3333	0.000312523	1	0.313044	0.136608	0.243949	-0.0171204	40.4866	0.758678	25	0.000264215	13	0.000175975	21	0.000277108	19.6667	0.0002391	1	0.374559	0.499631	0.380484	-0.00989686	70.0371	0.777961
ENSMUSG00000034168	similar to polyglutamine-containing protein; RIKEN cDNA 6430527G18 gene	NM_145836	Irf2bpl	620	0.0275644	768	0.031367	733	0.0391484	707	0.0326933	1	0.725642	0.251161	0.14597	-0.0171134	40.5032	0.968545	903	0.0302873	610	0.0261755	813	0.0340105	775.333	0.0301578	1	0.655263	0.47728	0.137421	-0.0156204	44.3745	0.988574
ENSMUSG00000037621	atonal homolog 8 (Drosophila)	NM_153778	Atoh8	242	0.0188714	284	0.0205573	257	0.0241902	261	0.0212063	1	0.78861	0.213583	0.155664	-0.0170876	40.5644	0.935451	37	0.00211705	22	0.00162913	40	0.00288856	33	0.00221158	1	0.529897	0.652463	0.17399	-0.0134668	51.4706	0.940672
ENSMUSG00000032089	interleukin 10 receptor, alpha	NM_008348	Il10ra	67	0.00127381	71	0.00125435	66	0.001516	68	0.00134805	1	0.559284	0.258736	0.154635	-0.0170663	40.615	0.974301	0	-3.92601e-06	0	-1.4122e-06	0	-2.63676e-06	0	-2.65833e-06	1	0.577314	1.11867	0.226192	-0.00995331	69.6399	0.741927
ENSMUSG00000046159	cholinergic receptor, muscarinic 3, cardiac	NM_033269	Chrm3	36	0.00373209	57	0.00548648	29	0.00362115	40.6667	0.0042799	1	0.944423	0.344043	0.117729	-0.0170613	40.6267	0.962044	7	0.000535648	4	0.000393243	12	0.00116264	7.66667	0.000697178	1	0.149774	0.709858	-0.000932878	N/A	N/A	N/A
ENSMUSG00000022676	snail homolog 2 (Drosophila)	NM_011415	Snai2	1078	0.0972059	980	0.0807467	1049	0.113527	1035.67	0.09716	1	0.665609	0.282676	0.141909	-0.0170543	40.6435	0.986105	1351	0.0918141	1020	0.0887535	1209	0.102533	1193.33	0.0943667	1	0.539847	0.260168	0.164291	-0.0167203	41.4554	0.968632
ENSMUSG00000064417	ENSMUSG00000064496; ENSMUSG00000065757; ENSMUSG00000065749; ENSMUSG00000064621; ENSMUSG00000064487; ENSMUSG00000064417; ENSMUSG00000084549; ENSMUSG00000084487; ENSMUSG00000064720; ENSMUSG00000084459; ENSMUSG00000064545; ENSMUSG00000064726; ENSMUSG00000064679; ENSMUSG00000084691; ENSMUSG00000084604; ENSMUSG00000064452; ENSMUSG00000065013; ENSMUSG00000065022		DQ267102	88	0.227392	43	0.10317	63	0.196622	64.6667	0.175728	1	0.37635	0.128279	0.243097	-0.01705	40.6537	0.766045	4	0.00708918	2	0.00485972	3	0.0069392	3	0.00629603	1	-0.0384058	-0.0132563	-0.0175244	N/A	N/A	N/A
ENSMUSG00000028688	target of EGR1, member 1 (nuclear)	NM_026654	Toe1	477	0.0109204	342	0.00715377	384	0.0105689	401	0.00954766	1	0.486565	0.352704	0.137748	-0.017038	40.6824	0.991318	503	0.00866895	348	0.00768363	345	0.00742041	398.667	0.00792433	1	0.609756	0.399177	0.234543	-0.0129077	53.7002	0.986833
ENSMUSG00000071001	histidine rich carboxyl terminus 1	NM_027511	Hrct1	4	0.00050933	9	0.0010649	11	0.00169222	8	0.00108882	1	1.0893	0.748417	0.0773173	-0.0170371	40.6845	0.825699	0	-1.5698e-06	0	-1.19892e-06	0	-2.94326e-06	0	-1.90399e-06	1	1.12442	3.23585	0.113096	-0.00992417	69.8443	0.303018
ENSMUSG00000055150	zinc finger protein 78	NM_001112805,NM_001025163,NM_177888	Zfp78	72	0.00443522	24	0.00135788	32	0.00236841	42.6667	0.0027205	1	0.253496	0.205036	0.213399	-0.0170157	40.7356	0.807097	33	0.00152011	16	0.000948487	25	0.00144396	24.6667	0.00130419	1	0.534175	0.676429	0.279524	-0.0103294	67.104	0.928972
ENSMUSG00000092495				5	0.00401771	5	0.00369789	6	0.0058005	5.33333	0.00450537	1	0.872805	0.248204	0.14268	-0.0170027	40.767	0.949934	11	0.00668806	4	0.0031085	7	0.00530379	7.33333	0.00503345	1	0.424516	0.179276	0.142536	-0.0191859	36.128	0.929612
ENSMUSG00000048485	zinc finger and BTB domain containing 8b	NM_153541	Zbtb8b	22	0.000349758	18	0.000250678	24	0.000451414	21.3333	0.000350617	1	0.311215	0.398678	0.145765	-0.0169992	40.7752	0.923076	151	0.00184191	70	0.00109117	108	0.00164196	109.667	0.00152501	1	0.410659	0.36059	0.120161	-0.0181043	38.2864	0.979822
ENSMUSG00000039377	H2.0-like homeobox	NM_008250	Hlx	69	0.0032987	104	0.00462055	64	0.00369507	79	0.00387144	1	0.467354	0.153035	0.212624	-0.0169964	40.7819	0.840089	7	0.00024209	1	4.08349e-05	5	0.000218125	4.33333	0.000167017	1	0.153879	2.35725	0.60767	-0.00341126	203.194	0.0490236
ENSMUSG00000069874	immunity-related GTPase family M member 2	NM_019440	Irgm2	19	0.000502718	20	0.000488173	16	0.000510807	18.3333	0.000500566	1	0.458304	0.154282	0.212818	-0.0169959	40.7831	0.840438	10	0.000198123	9	0.000229023	5	0.000123531	8	0.000183559	1	0.467896	0.0788011	0.400087	-0.015088	45.9402	0.546575
ENSMUSG00000049103	chemokine (C-C motif) receptor 2	NM_009915	Ccr2	105	0.00136345	88	0.00106187	63	0.000988384	85.3333	0.0011379	1	0.406683	0.208753	0.188998	-0.0169794	40.8229	0.902223	1	5.58348e-06	0	-1.1955e-06	0	-1.71909e-06	0.333333	8.8963e-07	1	-0.315948	0.902562	0.276456	N/A	N/A	N/A
ENSMUSG00000086782				23	0.00570268	9	0.00201891	18	0.00535817	16.6667	0.00435992	1	0.947105	0.557026	0.0938768	-0.0169646	40.8584	0.915381	12	0.00222772	13	0.00310512	16	0.00372159	13.6667	0.00301814	1	0.680078	0.498369	0.500223	-0.00722093	95.9915	0.885048
ENSMUSG00000049680	RIKEN cDNA 2010005J08 gene	NM_178623,NM_001077661	Urgcp	421	0.00311322	574	0.00390625	447	0.00397059	480.667	0.00366336	1	0.719079	0.229424	0.156872	-0.0169579	40.8747	0.952317	815	0.00455581	442	0.00315864	566	0.00394439	607.667	0.00388628	1	0.637091	0.410764	0.224065	-0.0130374	53.1659	0.993863
ENSMUSG00000036144	mesenchyme homeobox 2	NM_008584	Meox2	709	0.0282315	504	0.0186481	444	0.021359	552.333	0.0227462	1	0.550627	0.313467	0.143663	-0.0169492	40.8957	0.993226	2	-2.69978e-05	1	1.73393e-05	2	3.76427e-05	1.66667	9.32807e-06	1	-2.06887	-0.0450767	0.784702	N/A	N/A	N/A
ENSMUSG00000084796				4	0.00274886	8	0.00509644	6	0.00498158	6	0.00427563	1	1.0893	0.23018	0.141748	-0.0169318	40.9375	0.905794	0	-8.47223e-06	1	0.000655849	0	-8.66442e-06	0.333333	0.000212904	1	1.12442	-0.00870675	0.207342	N/A	N/A	N/A
ENSMUSG00000040490	leucine rich repeat and fibronectin type III domain containing 2	NM_027452	Lrfn2	11	0.000630316	28	0.00149032	21	0.00145404	20	0.00119156	1	0.712833	0.218993	0.162131	-0.0169101	40.9902	0.943003	4	0.000170952	2	0.000108759	2	0.000105206	2.66667	0.000128306	1	0.583206	-0.0146073	-0.00570093	N/A	N/A	N/A
ENSMUSG00000089631				6	0.0026466	4	0.00158003	4	0.00208691	4.66667	0.00210451	1	0.430121	0.15715	0.217195	-0.0169089	40.993	0.835463	16	0.00534866	9	0.0038476	13	0.00542053	12.6667	0.00487226	1	0.804815	0.320672	0.153526	-0.015853	43.7235	0.978925
ENSMUSG00000058163	predicted gene 5431	NM_001024230	Gm5431	16	0.000383161	11	0.000244784	15	0.000433987	14	0.000353977	1	0.381256	0.612341	0.113399	-0.0169089	40.9931	0.914479	0	-1.18094e-06	0	-2.75589e-07	0	-7.54829e-07	0	-7.37118e-07	1	0.393547	2.64752	0.165874	-0.00979591	70.7588	0.359485
ENSMUSG00000087556				18	0.00366664	17	0.00320219	28	0.00686869	21	0.00457917	1	0.823572	0.361545	0.122077	-0.0168909	41.0367	0.981157	28	0.00430491	8	0.00157181	24	0.00459866	20	0.00349179	1	0.458555	1.08172	0.124689	-0.0142068	48.7899	0.770869
ENSMUSG00000027722	spermatogenesis associated 5	NM_001163511,NM_021343	Spata5	856	0.0175431	482	0.00901941	651	0.0160196	663	0.014194	1	0.506775	0.319958	0.146863	-0.0168759	41.0731	0.989408	787	0.0121305	498	0.00983964	651	0.012533	645.333	0.0115011	1	0.666569	0.371496	0.239358	-0.0128654	53.8767	0.980859
ENSMUSG00000049305	coiled-coil domain containing 71	NM_133744	Ccdc71	768	0.0451603	838	0.0450301	671	0.0472337	759	0.0458081	1	0.572194	0.291798	0.149511	-0.0168622	41.1065	0.987817	1320	0.0586245	922	0.052385	1068	0.0591706	1103.33	0.0567267	1	0.661305	0.369475	0.173857	-0.0149254	46.4409	0.99694
ENSMUSG00000029715	processing of precursor 7, ribonuclease P family, (S. cerevisiae)	NM_028753	Pop7	298	0.0292052	336	0.030163	235	0.0276518	289.667	0.0290067	1	0.551273	0.299146	0.149098	-0.01686	41.1121	0.988851	370	0.0273274	307	0.029028	260	0.0239624	312.333	0.0267726	1	0.648416	0.386924	0.211235	-0.0135737	51.0656	0.993037
ENSMUSG00000078435	ENSMUSG00000078435	NM_001163064		127	0.0155844	76	0.00851753	115	0.0169469	106	0.013683	1	0.376158	0.277253	0.170503	-0.0168562	41.1212	0.937024	135	0.0124716	79	0.00934979	118	0.0136083	110.667	0.0118099	1	0.537834	0.565894	0.355675	-0.00935532	74.0912	0.930653
ENSMUSG00000055148	Kruppel-like factor 2 (lung)	NM_008452	Klf2	101	0.0100489	94	0.00868981	70	0.00841313	88.3333	0.00905061	1	0.724747	0.273568	0.145791	-0.0168518	41.1318	0.977359	4	0.000268969	1	8.60103e-05	2	0.000172267	2.33333	0.000175749	1	0.566129	2.27745	0.523615	-0.00239812	289.038	0.0765599
ENSMUSG00000096916		NM_001254951		283	0.025047	137	0.0109926	224	0.0237781	214.667	0.0199392	1	0.389861	0.342193	0.152316	-0.0168475	41.1425	0.961651	365	0.0243514	198	0.0169167	278	0.0231461	280.333	0.0214714	1	0.49065	0.462283	0.316281	-0.0108884	63.6593	0.923097
ENSMUSG00000085207				8	0.00295553	14	0.00462435	12	0.00524182	11.3333	0.0042739	1	0.976307	0.268877	0.136912	-0.0168328	41.1784	0.942868	40	0.0112785	37	0.0133332	48	0.0168713	41.6667	0.0138277	1	0.848006	0.721712	0.790903	-0.00278642	248.759	0.778188
ENSMUSG00000036437	neuropeptide Y receptor Y1	NM_010934	Npy1r	87	0.00531156	66	0.00373735	65	0.00479286	72.6667	0.00461393	1	0.40025	0.204466	0.196284	-0.0168304	41.1842	0.890917	15	0.000674073	8	0.000466215	6	0.000335848	9.66667	0.000492045	1	0.868684	0.265171	0.504583	-0.00878035	78.943	0.647698
ENSMUSG00000032841	proline rich 5 like; hypothetical protein LOC100048398	NM_001110849,NM_001083810,NM_175181	Prr5l	233	0.00302417	245	0.002833	240	0.00370568	239.333	0.00318762	1	0.698188	0.249586	0.154624	-0.0168289	41.1879	0.966145	1161	0.0115002	690	0.00873527	794	0.00980307	881.667	0.0100128	1	0.708343	0.361727	0.216322	-0.013496	51.3593	0.984461
ENSMUSG00000035399	RIKEN cDNA 3230401D17 gene	NM_025699	Oser1	266	0.00755053	599	0.0155766	197	0.00672702	354	0.00995139	1	0.473646	0.335091	0.147068	-0.0168277	41.1909	0.985945	201	0.00428503	503	0.0137558	144	0.00383488	282.667	0.0072919	1	0.769771	0.480981	0.2915	-0.0105657	65.6037	0.993456
ENSMUSG00000018595	glycine receptor, alpha 4 subunit	NM_010297	Glra4	3	0.00016212	4	0.000197991	0	-2.8403e-06	2.33333	0.00011909	1	0.868943	1.09515	0.0700446	-0.0168146	41.223	0.753014	11	0.00045191	5	0.000262483	5	0.000256283	7	0.000323559	1	0.744276	0.573977	0.199725	-0.0124586	55.6359	0.981087
ENSMUSG00000036158	prickle like 1 (Drosophila)	NM_001033217	Prickle1	1026	0.0228584	1472	0.0303102	1047	0.0280856	1181.67	0.0270848	1	0.914086	0.220795	0.154037	-0.0168145	41.2232	0.923091	1058	0.0177419	624	0.0133867	750	0.0156873	810.667	0.0156053	1	0.766663	0.402342	0.203654	-0.0134158	51.6665	0.991206
ENSMUSG00000055041	COMM domain containing 5	NM_025536	Commd5	721	0.0676069	482	0.0414449	547	0.0617151	583.333	0.0569223	1	0.498222	0.394539	0.134114	-0.0168144	41.2235	0.991969	523	0.0368201	379	0.0342329	382	0.0335981	428	0.0348837	1	0.656178	0.48213	0.193444	-0.013415	51.6694	0.99791
ENSMUSG00000020812	RIKEN cDNA 1810032O08 gene		1810032O08Rik	143	0.00426154	85	0.00228296	129	0.00459234	119	0.00371228	1	0.249557	0.25183	0.200053	-0.016798	41.2636	0.830983	269	0.00605859	155	0.00446686	243	0.00682748	222.333	0.00578431	1	0.204281	0.278973	0.172463	-0.0177331	39.0878	0.820738
ENSMUSG00000077440	ENSMUSG00000077440		Gm23130	92	0.230454	46	0.104436	59	0.176838	65.6667	0.170576	1	0.188595	0.216862	0.231968	-0.0167774	41.3144	0.733387	117	0.220905	67	0.162007	89	0.209783	91	0.197565	1	0.290267	0.398261	0.370325	-0.0111932	61.9255	0.703819
ENSMUSG00000095766				6	0.00171555	2	0.000519101	6	0.00207279	4.66667	0.00143582	1	0.725685	0.304034	0.140038	-0.0167702	41.3321	0.987099	13	0.00281218	3	0.000830028	4	0.00107678	6.66667	0.001573	1	0.539533	1.92546	1.25178	0.00252628	>Capzb	0.140189
ENSMUSG00000028003	lecithin-retinol acyltransferase (phosphatidylcholine-retinol-O-acyltransferase)	NM_023624	Lrat	35	0.0012006	28	0.000892519	21	0.000869953	28	0.000987691	1	0.52273	0.481125	0.121117	-0.0167554	41.3685	0.980359	0	-3.70036e-06	0	-1.00484e-06	1	3.07025e-05	0.333333	8.66577e-06	1	-7.63276	2.08019	3.13481	N/A	N/A	N/A
ENSMUSG00000070923	kelch-like 9 (Drosophila)	NM_172871	Klhl9	5721	0.250952	3107	0.124694	4644	0.245012	4490.67	0.206886	1	0.522996	0.355781	0.141352	-0.0167319	41.4268	0.995318	5084	0.167685	2873	0.121474	3691	0.151991	3882.67	0.14705	1	0.496593	0.327508	0.186901	-0.0153035	45.2935	0.973049
ENSMUSG00000054662	anoctamin 9	NM_178381	Ano9	0	-0.000133694	7	-0.000121996	1	-0.000278627	2.66667	-0.000178106	1	0.575358	0.541576	0.111869	-0.0167317	41.4271	0.965596	812	0.0375766	476	0.0281401	552	0.0318349	613.333	0.0325172	1	0.911954	1.327	1.27179	0.00227838	>Capzb	0.670414
ENSMUSG00000023243	potassium channel, subfamily K, member 5	NM_021542	Kcnk5	184	0.0100256	176	0.00882463	158	0.0103483	172.667	0.00973284	1	0.700352	0.220742	0.167392	-0.0167101	41.4808	0.9417	174	0.00713179	112	0.00587994	139	0.00711289	141.667	0.00670821	1	0.618084	0.476153	0.280281	-0.0111953	61.9144	0.987019
ENSMUSG00000078190	dynamin 3, opposite strand			1190	0.0137741	536	0.00576497	2587	0.0361776	1437.67	0.0185722	1	0.863379	0.443272	0.112106	-0.01671	41.481	0.964391	2	-2.50077e-05	1	4.65283e-06	0	-6.29234e-05	1	-2.77594e-05	1	0.288796	-0.944591	0.163982	N/A	N/A	N/A
ENSMUSG00000014725	a disintegrin and metallopeptidase domain 28	NM_183366,NM_010082,NM_001048175	Adam28	0	-2.42388e-07	0	-2.6878e-06	0	-1.56825e-06	0	-1.49948e-06	1	1.76497	0.198572	0.140089	-0.0167095	41.4823	0.776114	3	6.81266e-05	5	0.000145054	5	0.000141505	4.33333	0.000118229	1	1.16985	1.01064	0.399449	-0.00554388	125.029	0.670119
ENSMUSG00000024256	adenylate cyclase activating polypeptide 1	NM_009625	Adcyap1	16	0.00140916	14	0.00114596	24	0.00255417	18	0.0017031	1	0.653691	0.568602	0.106186	-0.0167056	41.4919	0.954055	1	6.20384e-05	0	-1.29018e-06	0	-4.44244e-06	0.333333	1.87686e-05	1	-0.0472388	2.45841	-18.4413	N/A	N/A	N/A
ENSMUSG00000085826				6	0.000200995	4	0.000124682	7	0.000283337	5.66667	0.000203005	1	0.581741	0.459256	0.121648	-0.0167056	41.492	0.988327	3	7.52157e-05	0	-1.40373e-07	1	3.10102e-05	1.33333	3.53618e-05	1	-0.00494574	1.98564	-0.00282779	N/A	N/A	N/A
ENSMUSG00000040302	RIKEN cDNA C030048B08 gene	NM_172991	Rbm48	252	0.00950839	151	0.00518871	196	0.00888013	199.667	0.00785908	1	0.375793	0.230647	0.191473	-0.0167055	41.4921	0.902857	269	0.00764143	179	0.00651492	204	0.0072342	217.333	0.00713019	1	0.513645	0.378536	0.372236	-0.0104159	66.547	0.867323
ENSMUSG00000054967	zinc finger protein 647	NM_001168276,NM_172817	Zfp647	199	0.022713	189	0.019866	182	0.0249949	190	0.0225246	1	0.489898	0.26129	0.168527	-0.0166991	41.508	0.961551	167	0.0143262	110	0.0120916	133	0.014245	136.667	0.0135543	1	0.490277	0.37267	0.345694	-0.0110091	62.9614	0.877443
ENSMUSG00000091109				7	0.0297326	4	0.015404	7	0.0357322	6	0.0269563	1	0.618541	0.469368	0.118789	-0.0166901	41.5305	0.985634	12	0.0384961	6	0.0246306	8	0.0319976	8.66667	0.0317081	1	0.975668	0.600565	1.12531	-0.000908223	763.191	0.0567889
ENSMUSG00000037653	potassium channel tetramerisation domain containing 8	NM_175519	Kctd8	12	0.000474708	10	0.000365429	14	0.00066577	12	0.000501969	1	0.724342	0.184301	0.182405	-0.0166841	41.5454	0.897884	8	0.000237453	4	0.000152196	11	0.000408245	7.66667	0.000265965	1	1.17244	0.540723	0.454455	-0.00670672	103.351	0.829125
ENSMUSG00000047777	PHD finger protein 13	NM_172705	Phf13	904	0.0516584	907	0.0477218	819	0.0562568	876.667	0.051879	1	0.558284	0.272177	0.160435	-0.0166745	41.5692	0.976475	1043	0.044895	577	0.0317874	774	0.0415694	798	0.0394172	1	0.547244	0.780017	0.277499	-0.00988492	70.1217	0.892783
ENSMUSG00000079227	chemokine (C-C motif) receptor 5	NM_009917		27	0.000898138	4	0.000123642	23	0.000923645	18	0.000648475	1	0.484135	1.37777	0.0740111	-0.0166645	41.5943	0.708573	0	-2.76814e-06	0	-1.39202e-07	2	6.08741e-05	0.666667	1.93222e-05	1	0.499742	5.95691	-0.00285701	N/A	N/A	N/A
ENSMUSG00000027459	family with sequence similarity 110, member A	NM_146127,NM_028666	Fam110a	118	0.00332369	111	0.00284246	126	0.00425132	118.333	0.00347249	1	0.441342	0.253041	0.176865	-0.01666	41.6054	0.943738	272	0.00579918	160	0.00436241	214	0.00568874	215.333	0.00528344	1	0.481745	0.405555	0.237965	-0.0131395	52.7531	0.95719
ENSMUSG00000064858	ENSMUSG00000064877; ENSMUSG00000064897; ENSMUSG00000064858		Snora43	17	0.0245765	14	0.0183213	25	0.042908	18.6667	0.0286019	1	0.461919	0.178495	0.208247	-0.0166585	41.6092	0.870114	46	0.0504048	24	0.0336258	71	0.0970271	47	0.0603525	1	0.253979	0.36069	0.112374	-0.0192915	35.9301	0.913919
ENSMUSG00000067872	coiled-coil domain containing 87	NM_207268	Ccdc87	1	5.77174e-05	5	0.000267542	4	0.000278015	3.33333	0.000201091	1	0.866625	0.122867	0.21447	-0.0166584	41.6095	0.772797	2	8.72812e-05	2	0.000111428	4	0.000217507	2.66667	0.000138739	1	1.1704	0.360482	-0.000697436	N/A	N/A	N/A
ENSMUSG00000078490	RIKEN cDNA C030017K20 gene			2	2.98109e-05	6	8.31046e-05	4	7.20326e-05	4	6.16494e-05	1	1.30716	0.102057	0.212623	-0.0166501	41.6303	0.682469	0	-9.188e-08	0	-9.3563e-08	0	-1.25286e-07	0	-1.03576e-07	1	1.3493	0.441253	0.311013	-0.00953709	72.6791	0.809683
ENSMUSG00000038984	testis-specific protein, Y-encoded-like 5	NM_001085421	Tspyl5	107	0.00487942	82	0.0034116	120	0.00659399	103	0.00496167	1	0.561182	0.2427	0.170545	-0.0166422	41.6499	0.957473	165	0.00567875	95	0.00418411	94	0.00403101	118	0.00463129	1	0.496076	0.379325	0.297602	-0.0118853	58.3196	0.920616
ENSMUSG00000046709	mitogen-activated protein kinase 10	NM_009158,NM_001081567	Mapk10	27	0.000174169	18	0.00010771	46	0.000358441	30.3333	0.00021344	1	0.387286	0.306825	0.166494	-0.0166393	41.6573	0.94971	4	1.89156e-05	2	1.2304e-05	3	1.75584e-05	3	1.62593e-05	1	0.289415	-0.0130745	-0.00864716	N/A	N/A	N/A
ENSMUSG00000065438	ENSMUSG00000065438		Mir377	17	0.0465489	10	0.0254482	16	0.0529386	14.3333	0.0416452	1	0.410155	0.183702	0.212623	-0.0166239	41.6959	0.861548	1	0.00192031	0	-2.86508e-05	0	-9.20757e-05	0.333333	0.00059986	1	-0.0316309	0.794255	0.311013	N/A	N/A	N/A
ENSMUSG00000024697	guanine nucleotide binding protein, alpha 14	NM_008137	Gna14	159	0.00863891	101	0.0050835	107	0.00700847	122.333	0.00691029	1	0.641068	0.468139	0.119187	-0.0166204	41.7046	0.985418	19	0.000751568	18	0.000936097	31	0.00157014	22.6667	0.00108594	1	0.80533	0.431474	0.388215	-0.00901965	76.8485	0.93262
ENSMUSG00000019850	tumor necrosis factor, alpha-induced protein 3	NM_001166402,NM_009397	Tnfaip3	72	0.000781884	91	0.000891845	89	0.00115211	84	0.000941947	1	0.754377	0.291051	0.145336	-0.0166114	41.7271	0.979807	417	0.00346397	208	0.00220784	296	0.00306443	307	0.00291208	1	0.847271	0.502893	0.215923	-0.0121775	56.9203	0.983567
ENSMUSG00000083953	predicted gene 14049			5	0.00144167	0	-5.15465e-06	8	0.00277779	4.33333	0.00140477	1	0.696755	0.141837	0.212636	-0.0166034	41.7472	0.821559	4	0.000866567	1	0.000278185	5	0.00135203	3.33333	0.00083226	1	0.584232	0.721882	0.600209	-0.00512881	135.148	0.758265
ENSMUSG00000030725	similar to RIKEN cDNA 2610209A20 gene; RIKEN cDNA 2610209A20 gene	NM_026010	Lipt2	174	0.0191541	181	0.0182389	159	0.0210008	171.333	0.0194646	1	0.694529	0.353685	0.134816	-0.0166009	41.7535	0.996206	227	0.018838	173	0.0183776	191	0.0197789	197	0.0189982	1	0.768029	0.349193	0.0834454	-0.0195277	35.4956	0.981269
ENSMUSG00000037085	tRNA methyltranferase 12 homolog (S. cerevisiae)	NM_026642	Trmt12	207	0.00915862	146	0.00586612	200	0.0106315	184.333	0.00855207	1	0.356828	0.196665	0.213678	-0.0165971	41.7632	0.855114	281	0.00937513	200	0.00854342	213	0.00886448	231.333	0.00892768	1	0.420634	0.277483	0.28124	-0.0134987	51.3492	0.86039
ENSMUSG00000062116	RIKEN cDNA 5730403M16 gene	NM_172738	Zfp954	303	0.0277834	198	0.0164923	192	0.0210963	231	0.0217907	1	0.496122	0.299038	0.160268	-0.0165697	41.8321	0.978925	399	0.0275828	267	0.0236343	260	0.0224325	308.667	0.0245499	1	0.598381	0.491442	0.261225	-0.0115934	59.788	0.988302
ENSMUSG00000021701	polo-like kinase 2 (Drosophila)	NM_152804	Plk2	2323	0.152204	2520	0.151238	2082	0.163851	2308.33	0.155765	1	0.645669	0.258275	0.161967	-0.0165498	41.8824	0.969828	3848	0.190375	2449	0.154995	2472	0.152505	2923	0.165958	1	0.530777	0.459115	0.291774	-0.0112975	61.354	0.955554
ENSMUSG00000050092	small proline-rich protein 2B	NM_011469	Sprr2b	0	-7.05833e-07	0	-1.40884e-05	0	-5.48011e-06	0	-6.75811e-06	1	3.52994	0.0945582	0.175111	-0.0165478	41.8875	0.507926	1	0.000198385	3	0.000760318	2	0.000494475	2	0.000484393	1	2.3397	0.481255	0.499312	-0.00538221	128.785	0.314694
ENSMUSG00000086161				0	-5.19421e-06	0	-2.46848e-05	0	-1.15223e-05	0	-1.38004e-05	1	0.252139	0.0567349	0.437779	-0.0165408	41.9054	0.47818	7	0.00145991	5	0.00133218	4	0.00103967	5.33333	0.00127725	1	0.167121	0.288753	1.24828	-0.00537514	128.954	0.113933
ENSMUSG00000042275	pelota homolog (Drosophila)	NM_134058	Pelo	377	0.0431018	478	0.0503338	329	0.045162	394.667	0.0461992	1	0.61968	0.210473	0.182074	-0.0165218	41.9535	0.928067	605	0.052217	326	0.0359795	400	0.0430557	443.667	0.0437507	1	0.380265	0.424395	0.214612	-0.0140266	49.4166	0.92093
ENSMUSG00000043858	nucleoporin 62	NM_053074	Nup62	3218	0.102212	2585	0.0745677	2711	0.103283	2838	0.093354	1	0.597344	0.344016	0.143771	-0.0165199	41.9584	0.998455	4534	0.108621	3548	0.108818	3447	0.103034	3843	0.106824	1	0.689369	0.502607	0.22368	-0.0122826	56.4333	0.998959
ENSMUSG00000056130	toll-like receptor adaptor molecule 2	NM_173394	Ticam2	23	0.000971274	22	0.000863306	16	0.000816314	20.3333	0.000883631	1	0.30311	0.222422	0.212623	-0.0164968	42.0171	0.845776	0	-2.99355e-06	0	-9.7195e-07	0	-1.41981e-06	0	-1.7951e-06	1	0.312882	-59.4279	0.311013	N/A	N/A	N/A
ENSMUSG00000046088	ENSMUSG00000046088		Gm9805	9	0.00969661	1	0.00096445	6	0.00779031	5.33333	0.00615046	1	0.192947	0.631127	0.141857	-0.0164724	42.0794	0.761674	6	0.00485033	2	0.00207707	3	0.00302742	3.66667	0.00331827	1	0.391122	0.720835	0.333439	-0.00950255	72.9433	0.777644
ENSMUSG00000049112	oxytocin receptor	NM_001081147	Oxtr	8	0.000320944	11	0.000406459	14	0.000675102	11	0.000467502	1	0.979056	0.168519	0.183273	-0.0164598	42.1114	0.846305	5	0.000150427	6	0.000231663	11	0.000413967	7.33333	0.000265352	1	1.17089	0.119112	0.0902819	-0.0217728	31.8354	0.866917
ENSMUSG00000006200	reproductive homeobox 6	NM_008955	Rhox6	0	-7.82451e-06	0	-4.22979e-05	0	-2.27811e-05	0	-2.43012e-05	1	1.10311	0.174569	0.175111	-0.0164477	42.1424	0.839308	16	0.00219919	13	0.00228272	12	0.00205556	13.6667	0.00217916	1	0.731155	0.88847	0.499312	-0.00528212	131.225	0.887157
ENSMUSG00000071083	ENSMUSG00000071083		Gm10311	39	0.0184776	20	0.0085206	42	0.0239326	33.6667	0.0169769	1	0.4686	0.409855	0.141776	-0.016438	42.1674	0.984688	48	0.0171376	37	0.0169226	38	0.0169227	41	0.0169943	1	0.438541	0.389424	0.394657	-0.0102054	67.9194	0.808966
ENSMUSG00000078317	factor 8-associated gene A	NM_007978		92	0.00671493	115	0.00757139	113	0.00987548	106.667	0.00805393	1	0.698762	0.323816	0.144512	-0.0164305	42.1867	0.992306	340	0.0188675	233	0.0165274	246	0.0170142	273	0.0174697	1	0.608882	0.383655	0.182648	-0.0146237	47.3989	0.996848
ENSMUSG00000016984	Ewing's tumor-associated antigen 1	NM_026576	Etaa1	1362	0.0596316	735	0.029294	1029	0.0541166	1042	0.0476807	1	0.40634	0.33846	0.161926	-0.0164281	42.1927	0.962542	1439	0.0474292	886	0.0374177	1024	0.0421306	1116.33	0.0423258	1	0.707569	0.575259	0.486219	-0.00688282	100.707	0.947085
ENSMUSG00000043421	RIKEN cDNA 2310016C08 gene	NM_001190461,NM_023516	Hilpda	454	0.0508494	306	0.031497	376	0.0507361	378.667	0.0443608	1	0.540807	0.39012	0.140554	-0.0164222	42.2081	0.996695	230	0.0192826	197	0.0212352	182	0.019082	203	0.0198666	1	0.595392	0.375246	0.18647	-0.0145981	47.4819	0.994421
ENSMUSG00000044707	cyclin J-like	NM_001045530	Ccnjl	144	0.00872313	197	0.0109482	182	0.0132511	174.333	0.0109741	1	0.863037	0.239476	0.1597	-0.0164186	42.2172	0.938315	283	0.0129606	184	0.0107751	220	0.0125593	229	0.0120983	1	0.868032	0.297326	0.231497	-0.0133653	51.8618	0.929514
ENSMUSG00000029204	ras homolog gene family, member H	NM_001081105	Rhoh	34	0.00125833	22	0.000756721	19	0.000849693	25	0.000954915	1	0.281982	0.334004	0.179051	-0.0164118	42.2346	0.883222	2	5.19106e-05	0	-8.51951e-07	0	-1.47786e-06	0.666667	1.65269e-05	1	-0.0217463	1.4441	0.261906	N/A	N/A	N/A
ENSMUSG00000020495	RIKEN cDNA 1200011M11 gene	NM_024262	Smg8	546	0.0228059	558	0.021329	527	0.0264352	543.667	0.0235234	1	0.58878	0.252421	0.172016	-0.0163868	42.2991	0.962307	921	0.0290514	571	0.023041	641	0.0252131	711	0.0257685	1	0.647891	0.425358	0.232096	-0.0126764	54.6803	0.994943
ENSMUSG00000051346	SPRY domain containing 4	NM_025716	Spryd4	598	0.0697636	473	0.0504066	498	0.0698117	523	0.0633273	1	0.623049	0.429073	0.130294	-0.0163766	42.3255	0.995239	682	0.0599266	492	0.0553697	488	0.0535092	554	0.0562685	1	0.555447	0.388786	0.202619	-0.0140685	49.2695	0.987831
ENSMUSG00000085105				17	0.000744305	13	0.00051469	15	0.000790431	15	0.000683142	1	0.358407	0.337032	0.168841	-0.0163753	42.3288	0.93856	27	0.000892354	21	0.000888353	14	0.000576746	20.6667	0.000785818	1	0.303121	0.515018	0.928923	-0.00446928	155.091	0.20183
ENSMUSG00000024261	synaptotagmin IV	NM_009308	Syt4	52	0.00244837	22	0.000962552	53	0.0030149	42.3333	0.00214194	1	0.485997	0.501006	0.128376	-0.016373	42.3347	0.972058	0	-7.54609e-06	0	-1.08369e-06	0	-5.24379e-06	0	-4.62452e-06	1	0.501664	2.16615	0.187782	-0.00926004	74.8536	0.418718
ENSMUSG00000020930	coiled-coil domain containing 103	NM_028492	Ccdc103	9	0.000551043	8	0.000443504	6	0.000438897	7.66667	0.000477814	1	0.384888	0.470069	0.140752	-0.0163612	42.3652	0.949924	11	0.000507509	12	0.00070915	10	0.000576141	11	0.0005976	1	0.745606	0.480164	0.599701	-0.00604145	114.732	0.778734
ENSMUSG00000045868	predicted gene 1966; predicted gene 8995; GTPase, very large interferon inducible 1	NM_001039160,NM_029000,NM_001243040	Gvin1	3	6.22409e-05	7	0.000134953	5	0.000125328	5	0.000107507	1	0.580962	0.262432	0.170098	-0.0163557	42.3794	0.968141	0	-1.91832e-07	0	-1.51936e-07	0	-2.17982e-07	0	-1.8725e-07	1	0.59969	1.13465	0.248811	-0.00924277	74.9934	0.72977
ENSMUSG00000030386	zinc finger protein 606	NM_026112	Zfp606	922	0.0106939	489	0.00517774	799	0.0111325	736.667	0.0090014	1	0.417852	0.2923	0.175272	-0.0163464	42.4037	0.951634	841	0.00733587	509	0.00569163	754	0.00821397	701.333	0.00708049	1	0.50946	0.3948	0.252961	-0.012748	54.3731	0.957479
ENSMUSG00000071291	zinc finger protein 58	NM_001007575	Zfp58	410	0.00985299	197	0.00434444	329	0.00950156	312	0.00789967	1	0.40968	0.301111	0.17375	-0.0163389	42.4232	0.951986	304	0.00548603	148	0.00342598	278	0.00627026	243.333	0.00506076	1	0.450386	0.57452	0.280261	-0.011102	62.4347	0.909431
ENSMUSG00000030424	RIKEN cDNA 9430025M13 gene; similar to zinc finger protein ZFP	NM_001243021	Zfp939	150	0.0145494	72	0.00640515	114	0.0132933	112	0.011416	1	0.330846	0.292047	0.18655	-0.0163238	42.4623	0.906178	109	0.00793807	56	0.00523222	91	0.00828262	85.3333	0.00715097	1	0.321864	0.501694	0.516455	-0.00818448	84.6904	0.576124
ENSMUSG00000095868				20	0.0373257	22	0.0370738	24	0.0535875	22	0.0426623	1	0.910847	0.543819	0.106175	-0.0163212	42.4692	0.930723	24	0.0337477	36	0.0648477	36	0.0632085	32	0.0539346	1	1.46408	0.339596	0.333139	-0.00980246	70.7116	0.720672
ENSMUSG00000075419	dolichol kinase	NM_177648	Dolk	254	0.021841	292	0.0230071	270	0.0278726	272	0.0242402	1	0.76058	0.318401	0.145557	-0.0163037	42.5148	0.98531	393	0.025505	274	0.0227507	327	0.0264687	331.333	0.0249082	1	0.675421	0.533868	0.235193	-0.0118048	58.7174	0.996624
ENSMUSG00000057409	hypothetical protein LOC100044273; zinc finger protein 53	NM_013843	Zfp53	357	0.0318069	221	0.0179516	237	0.0252875	271.667	0.0250153	1	0.518444	0.310158	0.162327	-0.0163029	42.5167	0.983491	352	0.0235982	247	0.0212217	313	0.0262153	304	0.0236784	1	0.718616	0.302964	0.252076	-0.0130648	53.0546	0.939403
ENSMUSG00000084899				54	0.0235828	34	0.0135856	46	0.0241412	44.6667	0.0204365	1	0.418272	0.218058	0.204633	-0.0162917	42.546	0.896375	55	0.0180777	32	0.0134754	43	0.0176425	43.3333	0.0163985	1	0.596214	0.563542	0.138963	-0.015172	45.6859	0.968681
ENSMUSG00000066363	serine (or cysteine) peptidase inhibitor, clade A, member 3F	NM_001168295,NM_001033335,NM_001168294	Serpina3f	5	0.000140288	11	0.000241447	3	9.76195e-05	6.33333	0.000159785	1	0.517169	0.0966671	0.291703	-0.0162864	42.5599	0.676375	17	0.00036232	95	0.00258941	17	0.000451908	43	0.00113455	1	0.757222	0.942304	0.352431	-0.00725168	95.5844	0.850561
ENSMUSG00000023341	myxovirus (influenza virus) resistance 2	NM_013606	Mx2	18	0.00134085	7	0.000350931	36	0.00318992	20.3333	0.00162723	1	0.389191	0.465504	0.143038	-0.0162723	42.5968	0.951991	164	0.00943271	107	0.00786513	165	0.0118268	145.333	0.0097082	1	0.206777	0.364233	0.31477	-0.0130471	53.1264	0.664691
ENSMUSG00000070866	zinc finger protein 804A	NM_175513	Zfp804a	6	0.000178171	6	0.000165564	9	0.000322888	7	0.000222207	1	0.871442	0.714398	0.0944989	-0.0162649	42.6161	0.877537	0	-5.49138e-07	0	-1.86399e-07	0	-5.61596e-07	0	-4.32378e-07	1	0.899536	3.08877	0.138228	-0.00915195	75.7376	0.304492
ENSMUSG00000040177	RIKEN cDNA 2310057M21 gene	NM_026655	2310057M21Rik	497	0.0411696	337	0.0255193	366	0.0363472	400	0.0343453	1	0.475593	0.274561	0.177542	-0.016258	42.6342	0.958688	590	0.036821	340	0.0271718	461	0.0359151	463.667	0.0333026	1	0.593203	0.39195	0.259948	-0.0123564	56.0961	0.97321
ENSMUSG00000031609	sin3 associated polypeptide	NM_021788	Sap30	515	0.0801566	342	0.0481389	381	0.0709613	412.667	0.0664189	1	0.578439	0.434688	0.135	-0.0162279	42.7132	0.994711	796	0.0935052	549	0.08255	603	0.0883857	649.333	0.088147	1	0.696877	0.502706	0.162249	-0.0143034	48.4604	0.988718
ENSMUSG00000031535	dickkopf homolog 4 (Xenopus laevis)	NM_145592	Dkk4	2	-0.000208544	12	-0.00103462	0	-0.000990166	4.66667	-0.000744443	1	1.38586	0.294435	0.131983	-0.0162213	42.7308	0.87211	1297	0.137954	1036	0.140772	674	0.0893437	1002.33	0.12269	1	0.722472	0.594376	0.376336	-0.00837247	82.7888	0.995093
ENSMUSG00000037465	Kruppel-like factor 10	NM_013692	Klf10	386	0.0232003	341	0.0187963	424	0.0305856	383.667	0.0241941	1	0.465841	0.302576	0.171127	-0.0162161	42.7443	0.968988	556	0.0252095	300	0.017405	514	0.0290731	456.667	0.0238959	1	0.564116	0.728399	0.316808	-0.00921292	75.2364	0.916978
ENSMUSG00000063286	ENSMUSG00000063286		Gm8995	10	0.00162521	7	0.00105715	11	0.00215986	9.33333	0.00161407	1	0.522865	0.349909	0.154635	-0.0162149	42.7477	0.992321	0	-5.00904e-06	0	-1.19019e-06	0	-3.75663e-06	0	-3.31862e-06	1	0.539721	1.51287	0.226192	-0.00910188	76.1543	0.567091
ENSMUSG00000075217	RIKEN cDNA 4833423E24 gene	NM_001081664	4833423E24Rik	0	-2.61221e-06	0	-2.60698e-05	0	-5.91536e-06	0	-1.15324e-05	1	2.20621	0.102438	0.200127	-0.0161919	42.8082	0.589488	12	0.0007342	18	0.00140692	7	0.000533749	12.3333	0.000891625	1	1.46231	0.521359	0.570642	-0.00502633	137.903	0.540551
ENSMUSG00000049409	prokineticin receptor 1	NM_021381	Prokr1	296	0.0134034	264	0.0111064	286	0.0156453	282	0.013385	1	0.509337	0.403666	0.145727	-0.0161795	42.8411	0.991959	3	6.10634e-05	3	0.000118278	3	0.000100371	3	9.32375e-05	1	-0.355683	0.0815597	-0.0577908	N/A	N/A	N/A
ENSMUSG00000027967	neurogenin 2	NM_009718	Neurog2	1	8.25028e-05	3	0.000229995	10	0.000996764	4.66667	0.000436421	1	4.35248	0.405504	0.085049	-0.0161787	42.8431	0.546538	0	-2.54281e-07	0	-2.58939e-07	0	-1.73366e-06	0	-7.48961e-07	1	-281.539	-662.532	0.124405	N/A	N/A	N/A
ENSMUSG00000043336	filamin A interacting protein 1-like	NM_001177871,NM_001040397	Filip1l	985	0.0194558	629	0.01142	899	0.0213741	837.667	0.0174166	1	0.459145	0.27898	0.180101	-0.0161723	42.8601	0.955345	809	0.0120085	426	0.00810562	615	0.0113964	616.667	0.0105035	1	0.577482	0.439372	0.342879	-0.0102784	67.4371	0.940269
ENSMUSG00000034071	zinc fingr protein 551	NM_001033820	Zfp551	163	0.00886816	100	0.00497361	144	0.00942737	135.667	0.00775638	1	0.378304	0.234783	0.206849	-0.0161481	42.9243	0.891563	172	0.0070446	99	0.00519443	114	0.005825	128.333	0.00602135	1	0.551536	0.633973	0.535009	-0.0063626	108.941	0.802851
ENSMUSG00000027324	RNA pseudouridylate synthase domain containing 2	NM_173450	Rpusd2	112	0.00753877	118	0.00720721	124	0.00998516	118	0.00824371	1	0.613553	0.196103	0.200819	-0.0161399	42.9463	0.900103	352	0.0179834	195	0.0127353	261	0.0166219	269.333	0.0157802	1	0.49501	0.340258	0.271636	-0.0128134	54.0954	0.924847
ENSMUSG00000038663	fibronectin type III and SPRY domain containing 2	NM_172904	Fsd2	8	0.000369312	12	0.000514291	7	0.000389233	9	0.000424278	1	0.872027	0.459764	0.120218	-0.0161346	42.9603	0.96278	2	6.84855e-05	1	4.38932e-05	3	0.000129475	2	8.06179e-05	1	-0.0149606	0.705185	1.33755	N/A	N/A	N/A
ENSMUSG00000049225	protein phosphatase 2C, magnesium dependent, catalytic subunit	NM_001098231,NM_001033453,NM_001098230	Pdp1	664	0.00745717	425	0.0043998	585	0.00791699	558	0.00659132	1	0.550916	0.35845	0.152912	-0.0161265	42.982	0.996085	257	0.00215434	200	0.00215966	246	0.00258356	234.333	0.00229919	1	0.555191	0.372686	0.231432	-0.0133593	51.885	0.974261
ENSMUSG00000007812	zinc finger protein 655	NM_028298,NM_001083958	Zfp655	1323	0.0510373	689	0.0243254	973	0.045122	995	0.0401616	1	0.399494	0.276053	0.189154	-0.0161153	43.0116	0.931109	1180	0.0342288	627	0.0233141	833	0.0301731	880	0.0292387	1	0.538904	0.468893	0.40434	-0.00913489	75.8791	0.88815
ENSMUSG00000036376	activator of basal transcription 1	NM_013924	Abt1	572	0.08206	424	0.055399	427	0.0734503	474.333	0.0703031	1	0.472371	0.336783	0.16437	-0.0161098	43.0265	0.979587	666	0.0719743	507	0.0701794	528	0.0712336	567	0.0711291	1	0.618753	0.369232	0.189043	-0.0145013	47.7989	0.994123
ENSMUSG00000034379	WD repeat domain 5B	NM_027113	Wdr5b	211	0.0216699	115	0.0108044	168	0.0207439	164.667	0.0177394	1	0.362316	0.253135	0.203212	-0.0160904	43.0784	0.896621	159	0.0122638	105	0.0103903	134	0.0129146	132.667	0.0118562	1	0.611961	0.453006	0.283155	-0.0113045	61.3161	0.98172
ENSMUSG00000036867	MAD homolog 6 (Drosophila)	NM_008542	Smad6	199	0.00993999	249	0.0113836	193	0.0115333	213.667	0.0109523	1	0.798546	0.213391	0.181732	-0.0160875	43.0862	0.91527	453	0.0171256	273	0.0131955	354	0.0166882	360	0.0156698	1	0.83673	0.626403	0.327309	-0.00885901	78.2421	0.990241
ENSMUSG00000050945	zinc finger protein 438	NM_178722	Zfp438	145	0.00827405	80	0.00414283	81	0.00553633	102	0.0059844	1	0.466795	0.288651	0.179181	-0.0160705	43.1318	0.960745	194	0.00834682	112	0.00617014	114	0.00612165	140	0.00687954	1	0.675963	0.437675	0.350536	-0.00990054	70.0111	0.957404
ENSMUSG00000088059				27	0.0352426	14	0.0164424	9	0.0136643	16.6667	0.0217831	1	0.161686	0.181019	0.294968	-0.0160698	43.1336	0.631248	41	0.0403856	26	0.0327867	43	0.0529035	36.6667	0.0420253	1	0.05677	0.055119	0.0462751	-0.0332665	20.8362	0.802176
ENSMUSG00000046794	protein phosphatase 1, regulatory (inhibitor) subunit 3B	NM_177741	Ppp1r3b	392	0.0169694	418	0.0164297	386	0.0199284	398.667	0.0177758	1	0.606809	0.268126	0.174134	-0.0160696	43.1341	0.968864	1194	0.0392193	672	0.0282176	937	0.0383728	934.333	0.0352699	1	0.58977	0.390517	0.186449	-0.0144873	47.8453	0.995673
ENSMUSG00000037204	RIKEN cDNA 9430023L20 gene	NM_026566	9430023L20Rik	554	0.0824766	440	0.0595601	492	0.0878585	495.333	0.0766318	1	0.566532	0.425646	0.140657	-0.0160671	43.1409	0.995792	920	0.103422	593	0.0853035	662	0.0928193	725	0.0938483	1	0.572174	0.563845	0.244442	-0.0116498	59.4986	0.977292
ENSMUSG00000027300	U box domain containing 5	NM_080562,NM_001255994,NM_001255993	Ubox5	416	0.0110847	358	0.00869753	395	0.0126312	389.667	0.0108045	1	0.630639	0.276304	0.170734	-0.0160383	43.2183	0.973959	791	0.0159305	444	0.0114381	538	0.0135102	591	0.0136263	1	0.677411	0.477391	0.332393	-0.00995883	69.6012	0.980578
ENSMUSG00000036898	zinc finger protein 157	NM_028130	Zfp157	1202	0.015309	626	0.00728141	869	0.0132945	899	0.0119616	1	0.376904	0.289549	0.190521	-0.0160105	43.2933	0.925054	1013	0.00969752	633	0.0077708	809	0.0096755	818.333	0.00904794	1	0.490137	0.445053	0.311147	-0.0111145	62.3641	0.923968
ENSMUSG00000036533	CDC42 effector protein (Rho GTPase binding) 3	NM_026514	Cdc42ep3	479	0.0447004	365	0.0315494	428	0.0481942	424	0.0414813	1	0.685561	0.333162	0.153084	-0.0160045	43.3095	0.993489	109	0.00753232	73	0.00652681	93	0.00807184	91.6667	0.00737699	1	0.795787	0.379924	0.32316	-0.010607	65.3479	0.9389
ENSMUSG00000030443	zinc finger protein 583	NM_001033249	Zfp583	215	0.00506199	117	0.00252658	173	0.00489713	168.333	0.0041619	1	0.465411	0.338535	0.167411	-0.0160005	43.3204	0.977002	147	0.00259734	90	0.00204085	134	0.00295987	123.667	0.00253269	1	0.565533	0.487919	0.365518	-0.00957295	72.4069	0.934831
ENSMUSG00000093597				9	0.00168098	16	0.00273252	15	0.00336486	13.3333	0.00259278	1	0.673437	0.272087	0.170452	-0.0159934	43.3396	0.970571	15	0.00211557	17	0.00306741	18	0.00316571	16.6667	0.0027829	1	1.09282	0.338871	0.388614	-0.00929552	74.5679	0.788079
ENSMUSG00000040963	asialoglycoprotein receptor 2	NM_007493	Asgr2	5	0.000248761	4	0.000184927	4	0.000239916	4.33333	0.000224535	1	0.871442	0.153085	0.213081	-0.0159928	43.3413	0.814972	0	-7.66704e-07	0	-2.082e-07	1	4.63076e-05	0.333333	1.51109e-05	1	0.899536	0.661879	-0.00280864	N/A	N/A	N/A
ENSMUSG00000040599	MIS12 homolog (yeast)	NM_025993	Mis12	1450	0.0441674	1057	0.0292896	1306	0.0477555	1271	0.0404042	1	0.634487	0.34103	0.154551	-0.0159927	43.3413	0.996533	2046	0.047007	1361	0.040029	1536	0.0440239	1647.67	0.0436866	1	0.659836	0.342242	0.197592	-0.0143594	48.2712	0.986101
ENSMUSG00000079737	RIKEN cDNA 3110001I22 gene	NM_025653		127	0.0135089	84	0.00819178	115	0.0147095	108.667	0.0121367	1	0.478577	0.168223	0.236665	-0.0159783	43.3806	0.832364	137	0.010972	71	0.00728246	101	0.0100933	103	0.00944923	1	0.718122	0.681156	0.673174	-0.00425722	162.817	0.828027
ENSMUSG00000078307	expressed sequence AI593442	NM_178906		8	0.000260903	13	0.000394311	15	0.000592411	12	0.000415875	1	0.65334	0.282407	0.169293	-0.0159666	43.4123	0.976432	7	0.000171637	1	3.10265e-05	0	-1.03038e-06	2.66667	6.72109e-05	1	0.50055	2.17917	-118.771	N/A	N/A	N/A
ENSMUSG00000037015	transmembrane protein 185B		Tmem185b	303	0.0311694	363	0.0340816	318	0.0391965	328	0.0348159	1	0.789445	0.376168	0.139943	-0.015965	43.4167	0.987337	550	0.042749	427	0.0424556	482	0.0467256	486.333	0.0439767	1	0.722968	0.394487	0.209264	-0.013399	51.7313	0.993016
ENSMUSG00000053925	ENSMUSG00000053925		Gm9929	20	0.00218697	21	0.00211788	19	0.00249959	20	0.00226815	1	0.392122	0.20584	0.225484	-0.0159611	43.4272	0.860802	40	0.00330717	14	0.00147935	21	0.00216387	25	0.00231679	1	0.262926	0.36009	0.142286	-0.0177434	39.065	0.897473
ENSMUSG00000025484	blocked early in transport 1 homolog (S. cerevisiae)-like	NM_018742	Bet1l	1064	0.125932	697	0.0759225	727	0.10357	829.333	0.101808	1	0.4646	0.379143	0.159366	-0.0159563	43.4404	0.98181	584	0.0517768	401	0.045673	437	0.0484661	474	0.0486386	1	0.581674	0.485702	0.308782	-0.0106137	65.3067	0.96953
ENSMUSG00000050164	melanin-concentrating hormone receptor 1	NM_145132	Mchr1	66	0.00553917	74	0.00577033	61	0.00618334	67	0.00583094	1	0.422569	0.264865	0.195277	-0.0159553	43.4432	0.92977	3	0.000172689	1	7.43102e-05	3	0.000225734	2.33333	0.000157578	1	-0.0431223	-0.100115	-0.0136088	N/A	N/A	N/A
ENSMUSG00000018238	growth differentiation factor 9	NM_008110	Gdf9	19	0.00134222	17	0.00111612	16	0.00136503	17.3333	0.00127445	1	0.45822	0.21596	0.211982	-0.0159536	43.4478	0.896706	1	4.91064e-05	0	-1.25657e-06	1	6.39798e-05	0.666667	3.72766e-05	1	2.49694	-38.1419	4.13125	N/A	N/A	N/A
ENSMUSG00000089281				5	0.00346021	5	0.00314243	6	0.00499478	5.33333	0.00386581	1	0.869494	0.371955	0.137908	-0.0159405	43.4835	0.975578	8	0.00417942	7	0.00468019	6	0.00390771	7	0.00425577	1	0.877329	1.03083	1.66764	0.00313569	>Capzb	0.664675
ENSMUSG00000036225	potassium channel tetramerisation domain containing 1	NM_001142731,NM_134112	Kctd1	154	0.00530411	158	0.00462082	152	0.00617827	154.667	0.00536773	1	0.668524	0.306067	0.162566	-0.0159322	43.5061	0.986283	1179	0.0312262	864	0.0292436	763	0.0251869	935.333	0.0285522	1	0.782919	0.623169	0.443779	-0.00704812	98.345	0.994993
ENSMUSG00000026094	serine/threonine kinase 17b (apoptosis-inducing)	NM_133810	Stk17b	671	0.0374219	351	0.017989	488	0.0328123	503.333	0.0294077	1	0.497884	0.348488	0.164078	-0.0159291	43.5144	0.985876	383	0.016006	230	0.0123475	205	0.0106966	272.667	0.0130167	1	0.688492	0.531971	0.268075	-0.0109548	63.2732	0.998822
ENSMUSG00000046862	RIKEN cDNA 4732496O08 gene	NM_172877	Pramef8	469	0.00996433	372	0.0071924	429	0.0109407	423.333	0.0093658	1	0.503799	0.305142	0.175213	-0.0159151	43.5527	0.97447	695	0.0111411	476	0.00976664	518	0.0103579	563	0.0104219	1	0.601134	0.401129	0.293103	-0.0114997	60.2752	0.961473
ENSMUSG00000026273	MTERF domain containing 2	NM_178051	Mterfd2	493	0.0111082	362	0.00742977	410	0.0110772	421.667	0.00987171	1	0.509636	0.283502	0.181274	-0.0159145	43.5546	0.96514	665	0.0112982	439	0.00954876	528	0.0111942	544	0.0106804	1	0.559514	0.481153	0.310259	-0.010675	64.9321	0.960588
ENSMUSG00000041849	caspase recruitment domain family, member 6	NM_001163138	Card6	29	0.000793135	35	0.000878845	30	0.000986393	31.3333	0.000886124	1	0.781519	0.371792	0.142635	-0.0158972	43.6018	0.988425	37	0.000762751	28	0.000738768	29	0.000745715	31.3333	0.000749078	1	0.473194	0.436721	0.103064	-0.0182457	37.9897	0.981571
ENSMUSG00000060275	neuregulin 2; similar to NTAK alpha2	NM_001167891	Nrg2	6	0.000156869	11	0.000254024	7	0.00021439	8	0.000208427	1	0.87118	0.472995	0.123282	-0.0158863	43.6317	0.961408	52	0.00104841	41	0.00105623	43	0.00108056	45.3333	0.00106173	1	0.584775	0.439739	0.25549	-0.0121237	57.1727	0.983405
ENSMUSG00000007216	zinc finger protein 775	NM_173429	Zfp775	179	0.00802477	206	0.00847508	177	0.00950843	187.333	0.00866943	1	0.427062	0.219074	0.217608	-0.0158536	43.7218	0.887054	193	0.00651451	164	0.0070891	227	0.0095686	194.667	0.00772407	1	0.594594	0.42186	0.263862	-0.0120244	57.6452	0.979352
ENSMUSG00000083104	ENSMUSG00000083104			14	0.0040194	9	0.00237956	9	0.00309722	10.6667	0.00316539	1	0.0599831	0.341716	0.284883	-0.0158475	43.7385	0.445836	9	0.00193817	5	0.00138167	10	0.00269557	8	0.00200514	1	0.915296	1.00973	0.399419	-0.00593669	116.756	0.783499
ENSMUSG00000063383	predicted gene 4769; hypothetical protein LOC100044278	NM_177596,NM_001256493	Zfp947	87	0.00555422	48	0.00280094	72	0.00551918	69	0.00462478	1	0.459938	0.219811	0.213625	-0.0158425	43.7524	0.89826	80	0.00384121	47	0.00289264	72	0.00431797	66.3333	0.00368394	1	0.526659	0.32186	0.27732	-0.01276	54.3218	0.920978
ENSMUSG00000025804	chemokine (C-C motif) receptor 1	NM_009912	Ccr1	175	0.0113503	131	0.00789533	127	0.00995104	144.333	0.00973223	1	0.353557	0.378623	0.174128	-0.0158317	43.7821	0.932581	0	-3.49827e-05	0	-8.88892e-06	1	4.36047e-05	0.333333	-8.89938e-08	1	0.364954	1.63701	-0.101099	N/A	N/A	N/A
ENSMUSG00000093637				12	0.00311922	4	0.000950169	3	0.000909394	6.33333	0.00165959	1	0.0720246	0.310775	0.286133	-0.0158307	43.7851	0.480748	12	0.00234731	4	0.00100259	13	0.00318049	9.66667	0.00217679	1	0.195468	0.359894	0.614641	-0.00892559	77.6584	0.381587
ENSMUSG00000021221	D4, zinc and double PHD fingers, family 3	NM_058212	Dpf3	16	0.000256577	15	0.000218929	16	0.000308672	15.6667	0.000261393	1	0.600247	0.124404	0.266802	-0.0158156	43.8267	0.744472	23	0.00027823	19	0.000294211	15	0.000226242	19	0.000266227	1	0.202268	0.227704	0.399475	-0.0130603	53.0728	0.577158
ENSMUSG00000046731	potassium channel tetramerisation domain containing 11	NM_153143	Kctd11	72	0.00484776	69	0.00427833	80	0.00649263	73.6667	0.00520624	1	0.640723	0.295632	0.17055	-0.0158053	43.8554	0.981238	51	0.00257767	39	0.00252794	39	0.00245949	43	0.0025217	1	0.688297	0.201561	0.178919	-0.0166034	41.7473	0.919546
ENSMUSG00000088308				1	0.0013574	1	0.00118354	8	0.0132767	3.33333	0.00527255	1	0.880881	0.657374	0.105635	-0.0158046	43.8573	0.900167	6	0.00623369	4	0.00531126	4	0.0051595	4.66667	0.00556815	1	0.194494	0.36032	0.751635	-0.00765222	90.5812	0.290905
ENSMUSG00000027536	chromatin modifying protein 4C; similar to chromatin modifying protein 4C	NM_025519	Chmp4c	8	0.000779205	6	0.000494329	4	0.000431588	6	0.000568374	1	0.637481	0.200303	0.207538	-0.0158029	43.8619	0.897208	52	0.00388209	33	0.00314868	46	0.00428168	43.6667	0.00377082	1	1.03509	1.2032	0.738196	-0.00128527	539.299	0.24478
ENSMUSG00000034216	vacuolar protein sorting 18 (yeast)	NM_172269	Vps18	343	0.00561375	512	0.00770541	341	0.00668321	398.667	0.00666745	1	0.776643	0.29501	0.163058	-0.0157918	43.8928	0.973137	719	0.00890072	427	0.00675727	570	0.00879921	572	0.0081524	1	0.608137	0.485879	0.278619	-0.0111946	61.9181	0.986307
ENSMUSG00000016087	Friend leukemia integration 1	NM_008026	Fli1	760	0.0449979	505	0.0277844	712	0.0509308	659	0.0412377	1	0.673079	0.334665	0.158872	-0.0157838	43.9152	0.993508	2	-4.94506e-05	0	-3.1281e-05	1	-3.2978e-05	1	-3.79032e-05	1	1.94855	1.44696	0.624229	-0.000760216	911.777	0.0135928
ENSMUSG00000018604	T-box 3	NM_198052,NM_011535	Tbx3	174	0.00202103	199	0.00214657	209	0.00293237	194	0.00236666	1	0.575943	0.298666	0.175025	-0.0157777	43.9322	0.979734	5	3.75393e-05	7	7.58629e-05	6	6.03548e-05	6	5.7919e-05	1	0.446934	0.0652753	-0.0216346	N/A	N/A	N/A
ENSMUSG00000035561	aldehyde dehydrogenase 1 family, member B1	NM_028270	Aldh1b1	22	0.00145798	23	0.00136602	34	0.00271134	26.3333	0.00184511	1	0.868278	0.746225	0.0999289	-0.0157776	43.9324	0.869522	88	0.00443801	55	0.00354552	58	0.00364429	67	0.00387594	1	0.770905	0.760191	0.310132	-0.0087168	79.5185	0.948813
ENSMUSG00000047343	RIKEN cDNA A530098C11 gene	NM_001013799	Mettl21c	5	0.000177794	2	6.62276e-05	6	0.000258319	4.33333	0.000167447	1	1.39446	0.302086	0.139737	-0.0157675	43.9604	0.867508	4	0.000106869	0	-7.45621e-08	0	-4.49291e-07	1.33333	3.54485e-05	1	0.874499	-995.122	-297.341	N/A	N/A	N/A
ENSMUSG00000082345	ENSMUSG00000082345			9	0.0038158	6	0.00229991	15	0.0076265	10	0.00458073	1	1.74179	0.101812	0.228089	-0.0157562	43.9919	0.608414	6	0.0019087	9	0.00367748	16	0.00636901	10.3333	0.00398506	1	1.55832	0.561551	0.249483	-0.00994278	69.7136	0.76035
ENSMUSG00000054381	similar to zinc finger protein HIT-39; zinc finger protein 747	NM_175560	Zfp747	104	0.0071523	74	0.00465661	135	0.0111466	104.333	0.00765184	1	0.358645	0.28434	0.2029	-0.0157472	44.0171	0.90527	204	0.0106063	79	0.0052528	180	0.0116678	154.333	0.00917564	1	0.447452	0.703084	0.255137	-0.0110676	62.6287	0.878038
ENSMUSG00000070509	RGM domain family, member A	NM_177740	Rgma	2051	0.0347002	2711	0.0421593	2384	0.0483672	2382	0.0417423	1	0.725181	0.244274	0.183781	-0.0157402	44.0368	0.94415	3751	0.0479528	2215	0.0362077	3407	0.0543172	3124.33	0.0461592	1	0.666292	0.47539	0.263499	-0.0114731	60.4148	0.996504
ENSMUSG00000085572				9	0.00203335	2	0.00037701	7	0.0019016	6	0.00143732	1	0.484433	0.680061	0.12212	-0.0157253	44.0785	0.917211	13	0.00221567	11	0.0024014	7	0.00148773	10.3333	0.00203493	1	0.269312	0.196393	0.142582	-0.0196167	35.3346	0.890827
ENSMUSG00000027905	DEAD (Asp-Glu-Ala-Asp) box polypeptide 20	NM_017397	Ddx20	1558	0.0553819	919	0.0295665	1218	0.0519123	1231.67	0.0456202	1	0.550903	0.455225	0.145037	-0.0157035	44.1397	0.991091	2006	0.0537514	1406	0.0482484	1555	0.0520014	1655.67	0.0513337	1	0.695541	0.560723	0.285267	-0.0103769	66.7972	0.997693
ENSMUSG00000022996	wingless related MMTV integration site 10b	NM_011718	Wnt10b	8	-0.000374627	68	-0.000568596	26	-0.00127575	34	-0.000739659	1	0.758096	0.481773	0.130276	-0.0156983	44.1543	0.977701	5885	0.21358	4204	0.194911	5563	0.251609	5217.33	0.220034	1	0.943227	1.08111	0.878353	-0.000668722	1036.52	0.321087
ENSMUSG00000048368	osteomodulin	NM_012050	Omd	4	0.000472281	4	0.000439158	6	0.00085646	4.66667	0.0005893	1	0.651652	0.459256	0.138731	-0.0156911	44.1745	0.992113	1	8.75803e-05	0	-4.94424e-07	0	-1.48963e-06	0.333333	2.85321e-05	1	2.36739	1.98564	-446.116	N/A	N/A	N/A
ENSMUSG00000039563	RIKEN cDNA 2210406O10 gene		2210406O10Rik	8	0.000319501	7	0.000257623	5	0.000240653	6.66667	0.000272592	1	0.543743	0.351824	0.166129	-0.0156801	44.2054	0.99198	8	0.000240434	4	0.000153916	3	0.000112406	5	0.000168919	1	0.585017	0.901189	2.67203	0.00505899	>Capzb	0.382621
ENSMUSG00000049686	ORAI calcium release-activated calcium modulator 1	NM_175423	Orai1	195	0.00813688	267	0.0102715	194	0.00974877	218.667	0.0093857	1	0.749957	0.370107	0.149643	-0.0156725	44.227	0.992197	219	0.00688225	151	0.00607265	140	0.00548601	170	0.00614697	1	0.678052	0.399296	0.156736	-0.0152975	45.3113	0.998812
ENSMUSG00000032531	angiomotin-like 2	NM_019764	Amotl2	1642	0.0115862	2174	0.0138307	1777	0.0149269	1864.33	0.0134479	1	0.96235	0.260212	0.167822	-0.0156671	44.2421	0.927914	7744	0.0416696	4757	0.0327125	5591	0.0374988	6030.67	0.0372937	1	0.657294	0.305846	0.244701	-0.0133648	51.8635	0.947963
ENSMUSG00000085289				4	0.000188333	4	0.000175595	5	0.000284885	4.33333	0.000216271	1	0.654593	0.30617	0.170392	-0.015666	44.2453	0.984368	5	0.000177423	0	-1.97693e-07	1	4.38715e-05	2	7.36988e-05	1	0.232523	1.32376	-0.00281499	N/A	N/A	N/A
ENSMUSG00000030641	RIKEN cDNA 4632434I11 gene	NM_001080995	4632434I11Rik	650	0.0355248	464	0.0229722	539	0.0353319	551	0.0312763	1	0.557698	0.36333	0.162871	-0.0156635	44.2523	0.995175	1030	0.0424933	708	0.0373847	718	0.0369492	818.667	0.0389424	1	0.582667	0.400918	0.378545	-0.0099267	69.8266	0.899358
ENSMUSG00000030256	basic helix-loop-helix family, member e41	NM_024469	Bhlhe41	57	0.00151838	65	0.00159675	84	0.00269611	68.6667	0.00193708	1	0.779605	0.274822	0.172684	-0.0156467	44.3	0.960997	65	0.00130415	36	0.00092425	56	0.00140058	52.3333	0.00120966	1	0.538976	0.620521	0.213863	-0.0122891	56.4033	0.955009
ENSMUSG00000037731	cDNA sequence BC013712	NM_001033308	Themis2	69	0.00411961	70	0.00388389	75	0.00540849	71.3333	0.00447067	1	0.530073	0.463085	0.146584	-0.015643	44.3105	0.987679	2	7.72951e-05	0	-4.37267e-06	3	0.000158821	1.66667	7.72477e-05	1	3.99614	-130.855	7.74437	N/A	N/A	N/A
ENSMUSG00000045598	zinc finger protein 553	NM_146201	Zfp553	419	0.011948	444	0.011513	438	0.0148671	433.667	0.012776	1	0.564005	0.209562	0.215207	-0.0156235	44.3658	0.899308	1302	0.0281768	684	0.018922	1167	0.0314894	1051	0.0261961	1	0.509352	0.365849	0.171884	-0.0154435	44.8827	0.986994
ENSMUSG00000070063	ENSMUSG00000077639; ENSMUSG00000084543; ENSMUSG00000064936; ENSMUSG00000084693; ENSMUSG00000070063; ENSMUSG00000065004		Snora33	29	0.0414712	13	0.0169843	30	0.0515236	24	0.0366597	1	0.478846	0.525073	0.141722	-0.0156196	44.3766	0.965683	26	0.0279588	13	0.0179212	29	0.0389519	22.6667	0.0282773	1	0.856532	0.83141	0.413701	-0.00643583	107.701	0.935205
ENSMUSG00000045322	toll-like receptor 9	NM_031178	Tlr9	6	0.000317359	8	0.000393204	5	0.000319516	6.33333	0.00034336	1	0.435721	0.382713	0.170098	-0.0156146	44.3909	0.970043	0	-9.78128e-07	0	-4.42687e-07	0	-5.55732e-07	0	-6.58849e-07	1	0.449768	1.6547	0.248811	-0.00850165	81.5309	0.483196
ENSMUSG00000089760				11	0.00126086	13	0.00130923	18	0.00247537	14	0.00168182	1	0.865941	0.393297	0.141416	-0.0156104	44.4031	0.976241	84	0.00740359	50	0.00563129	57	0.00625993	63.6667	0.0064316	1	0.751966	0.866043	0.438156	-0.0061483	112.738	0.912604
ENSMUSG00000074030	exocyst complex component 8	NM_198103	Exoc8	327	0.00807466	289	0.00656063	345	0.0102422	320.333	0.00829251	1	0.495004	0.205185	0.225411	-0.0156035	44.4226	0.881081	421	0.0078364	212	0.0050498	333	0.00773141	322	0.00687254	1	0.458322	0.401094	0.272769	-0.012387	55.9575	0.926212
ENSMUSG00000059486	kelch repeat and BTB (POZ) domain containing 2	NM_145958	Kbtbd2	1585	0.0346457	1162	0.0231043	1503	0.0394725	1416.67	0.0324075	1	0.682939	0.308091	0.169813	-0.0156005	44.4312	0.98384	2203	0.0363174	1498	0.0316148	1611	0.0331263	1770.67	0.0336862	1	0.731827	0.413678	0.292677	-0.0110989	62.452	0.975673
ENSMUSG00000078252	keratin associated protein 17-1	NM_001099774		0	-7.12056e-06	0	-2.15342e-05	0	-7.53875e-06	0	-1.20645e-05	1	0.160452	0.0851023	0.466964	-0.0155612	44.5432	0.457726	11	0.00200134	5	0.00116215	3	0.000680229	6.33333	0.00128124	1	0.10635	0.433129	1.3315	-0.00439562	157.69	0.0629154
ENSMUSG00000043284	transmembrane protein 11	NM_001168507,NM_173453	Tmem11	688	0.0341148	811	0.0367464	593	0.0352069	697.333	0.0353561	1	0.643231	0.341289	0.164801	-0.0155609	44.5441	0.994616	1068	0.0399696	876	0.0419504	900	0.0420254	948	0.0413151	1	0.662687	0.436557	0.186332	-0.0139524	49.6793	0.999958
ENSMUSG00000022367	hyaluronan synthase 2	NM_008216	Has2	1694	0.0734282	1014	0.040838	1286	0.0673436	1331.33	0.0605366	1	0.487139	0.37021	0.16997	-0.0155478	44.5817	0.983563	8	3.50111e-05	7	0.000246134	8	0.000208542	7.66667	0.000163229	1	8.75572	0.680125	0.250239	-0.00657556	105.413	0.120613
ENSMUSG00000094411				9	0.0167554	7	0.0118782	7	0.0156199	7.66667	0.0147512	1	0.38634	0.805225	0.122292	-0.0155392	44.6065	0.850319	19	0.0267564	9	0.016209	11	0.019315	13	0.0207601	1	0.369367	0.398505	0.181573	-0.015334	45.2033	0.935738
ENSMUSG00000063535	RIKEN cDNA 2810409K11 gene	NM_029584	Zfp773	51	0.00308293	25	0.00134922	46	0.00332869	40.6667	0.00258695	1	0.442648	0.328436	0.185093	-0.0155387	44.6077	0.960825	90	0.00410985	57	0.00333138	74	0.00421526	73.6667	0.00388549	1	0.520075	0.506169	0.486117	-0.00777901	89.1048	0.810374
ENSMUSG00000052241	RIKEN cDNA A930035D04 gene		A930035D04Rik	10	0.00337797	14	0.00432757	10	0.00404818	11.3333	0.00391791	1	0.433204	0.397783	0.169121	-0.0155378	44.6104	0.969211	15	0.0038234	14	0.00456631	14	0.00445229	14.3333	0.00428067	1	0.702598	0.927292	0.714046	-0.00293837	235.895	0.669536
ENSMUSG00000049717	ligase IV, DNA, ATP-dependent	NM_176953	Lig4	486	0.0123799	309	0.00718172	375	0.0114618	390	0.0103411	1	0.470503	0.259627	0.205139	-0.0155353	44.6175	0.931628	533	0.0102235	338	0.00830513	425	0.0101773	432	0.00956865	1	0.55555	0.353787	0.28664	-0.0121651	56.9782	0.936562
ENSMUSG00000038331	special AT-rich sequence binding protein 2	NM_139146	Satb2	36	0.000375959	29	0.000278302	34	0.000427367	33	0.000360543	1	0.532346	0.255621	0.20046	-0.0155351	44.618	0.942224	38	0.000298748	21	0.000211417	26	0.000254985	28.3333	0.00025505	1	0.39963	0.480332	0.422875	-0.00924839	74.9479	0.762622
ENSMUSG00000070420	zinc finger protein 498	NM_001081431	Zscan25	221	0.0202327	250	0.0208634	230	0.0251922	233.667	0.0220961	1	0.62979	0.224388	0.205192	-0.0155339	44.6216	0.920331	543	0.0376484	332	0.0294319	434	0.0375189	436.333	0.0348664	1	0.529784	0.353928	0.266877	-0.0126928	54.6094	0.943476
ENSMUSG00000030486	zinc finger protein 108	NM_018791	Zfp108	82	0.00779052	36	0.00313769	77	0.00879022	65	0.00657281	1	0.371245	0.309443	0.199505	-0.015531	44.63	0.919869	84	0.00600658	29	0.00265621	73	0.0065161	62	0.00505963	1	0.417939	0.496734	0.328403	-0.010676	64.9258	0.864913
ENSMUSG00000087519				8	0.000700257	4	0.000308799	10	0.00105418	7.33333	0.000687745	1	0.652528	1.29006	0.0848843	-0.0155292	44.6352	0.719973	6	0.000394418	11	0.000928466	6	0.000492396	7.66667	0.000605093	1	0.780476	0.260513	0.333655	-0.0116328	59.5857	0.83158
ENSMUSG00000036599	carbohydrate sulfotransferase 12	NM_021528	Chst12	169	0.0100095	237	0.0129938	147	0.0104703	184.333	0.0111579	1	0.778614	0.262067	0.180228	-0.015528	44.6384	0.950968	101	0.00448436	67	0.00381179	106	0.0058874	91.3333	0.00472785	1	0.519273	0.287677	0.112587	-0.0188623	36.7477	0.995949
ENSMUSG00000032733	sorting nexin 33	NM_175483	Snx33	329	0.0131861	385	0.0142106	361	0.0174038	358.333	0.0149335	1	0.783275	0.238939	0.189136	-0.0155056	44.7031	0.930731	431	0.0130228	249	0.00962544	330	0.0124349	336.667	0.0116944	1	0.66182	0.413548	0.299646	-0.0111101	62.3891	0.971058
ENSMUSG00000022313	UTP23, small subunit (SSU) processome component, homolog (yeast)	NM_030132	Utp23	291	0.0106178	180	0.00600194	240	0.01051	237	0.00904325	1	0.583039	0.372726	0.163372	-0.0154924	44.741	0.997555	362	0.00995426	186	0.00654865	276	0.00947108	274.667	0.008658	1	0.568654	0.530596	0.362061	-0.00935836	74.0672	0.944542
ENSMUSG00000068130	zinc finger protein 442		Zfp442	158	0.00991207	105	0.00599509	125	0.00938433	129.333	0.00843049	1	0.462187	0.354855	0.177717	-0.0154827	44.769	0.97359	137	0.00646135	125	0.00756023	171	0.010082	144.333	0.00803453	1	0.624037	0.703818	0.309598	-0.00930784	74.4692	0.951748
ENSMUSG00000031955	breast cancer anti-estrogen resistance 1	NM_001198839,NM_009954	Bcar1	716	0.0412617	859	0.0453601	761	0.0525009	778.667	0.0463743	1	0.855561	0.31357	0.16209	-0.0154823	44.7702	0.967975	1675	0.0730735	899	0.0501394	1354	0.0736518	1309.33	0.0656215	1	0.701589	0.533149	0.247089	-0.0114355	60.6138	0.99836
ENSMUSG00000037750	cDNA sequence BC017647	NM_145430	Fam222b	270	0.00543241	318	0.00587908	284	0.00686126	290.667	0.00605758	1	0.582951	0.176589	0.237776	-0.0154813	44.7732	0.84494	437	0.00663802	256	0.00497364	344	0.00651654	345.667	0.00604273	1	0.575485	0.450762	0.35127	-0.0100492	68.9755	0.938016
ENSMUSG00000005763	CD247 antigen	NM_001113393,NM_001113391,NM_001113394,NM_031162,NM_001113392	Cd247	3	4.29543e-05	5	6.62693e-05	7	0.00012109	5	7.6771e-05	1	2.03179	0.368274	0.121068	-0.0154517	44.859	0.757321	0	-1.32389e-07	1	1.37095e-05	0	-2.1061e-07	0.333333	4.45551e-06	1	-93.2467	0.717148	-63.5827	N/A	N/A	N/A
ENSMUSG00000051777	IQ motif containing J	NM_177585	Iqcj	0	-1.4498e-06	0	-4.28711e-06	0	-3.7521e-06	0	-3.163e-06	1	0.784431	0.0709186	0.350223	-0.0154476	44.8709	0.552554	9	0.000407488	4	0.000231365	6	0.000338555	6.33333	0.000325803	1	0.519932	0.360941	0.998623	-0.00428198	161.875	0.236346
ENSMUSG00000027913	cysteine-rich C-terminal 1	NM_028798	Crct1	0	-8.38817e-07	0	-1.67427e-05	0	-3.25629e-06	0	-6.94595e-06	1	1.76497	0.189116	0.175111	-0.0154476	44.8709	0.735494	2	0.000235762	6	0.000903566	2	0.000293819	3.33333	0.000477716	1	1.16985	0.96251	0.499312	-0.00428198	161.875	0.68158
ENSMUSG00000000435	myogenic factor 5	NM_008656	Myf5	251	0.0221418	154	0.0126238	218	0.0232338	207.667	0.0193331	1	0.458288	0.405559	0.167757	-0.0154384	44.8976	0.977082	0	-6.82432e-05	0	-1.42124e-05	0	-4.04104e-05	0	-4.09553e-05	1	0.473063	-2.56007	0.245387	N/A	N/A	N/A
ENSMUSG00000067931	cDNA sequence BC049807	NM_001002008	Zfp948	1562	0.109873	722	0.0467812	1063	0.0901629	1115.67	0.0822725	1	0.448466	0.349965	0.18164	-0.015436	44.9045	0.967428	560	0.0293746	364	0.0246205	357	0.0234497	427	0.025815	1	0.744808	0.602933	0.499471	-0.00648151	106.942	0.962746
ENSMUSG00000028525	phosphodiesterase 4B, cAMP specific	NM_001177980,NM_019840,NM_001177982,NM_001177981,NM_001177983	Pde4b	1231	0.00876944	1017	0.00663755	1048	0.00897311	1098.67	0.0081267	1	0.654195	0.349236	0.165501	-0.0154341	44.9101	0.995532	1331	0.00713912	897	0.00616219	981	0.00656672	1069.67	0.00662268	1	0.576197	0.323693	0.203503	-0.0145643	47.5922	0.975219
ENSMUSG00000089853				3	0.000986504	8	0.0024326	4	0.00157645	5	0.00166518	1	1.16711	0.154944	0.215111	-0.0154305	44.9205	0.767666	8	0.00199368	5	0.00159152	7	0.0021746	6.66667	0.00191993	1	0.291069	-0.00115281	0.142445	N/A	N/A	N/A
ENSMUSG00000084970				18	0.00310821	9	0.00141018	7	0.00143601	11.3333	0.0019848	1	0.386084	0.207134	0.245549	-0.0154246	44.9377	0.839499	29	0.00378051	13	0.00216889	17	0.00276637	19.6667	0.00290526	1	0.443847	0.499476	0.352453	-0.0101143	68.5313	0.867329
ENSMUSG00000074825	inositol 1,4,5-triphosphate receptor interacting protein-like 1	NM_001163527,NM_001163528	Itpripl1	297	0.00764884	337	0.00789242	348	0.0107409	327.333	0.00876072	1	0.812513	0.315621	0.165203	-0.0154228	44.943	0.97411	881	0.0172116	512	0.012787	643	0.015658	678.667	0.0152189	1	0.558644	0.432201	0.209628	-0.0135074	51.3162	0.989792
ENSMUSG00000029627	zinc finger with KRAB and SCAN domains 14	NM_023322	Zkscan14	85	0.00559623	61	0.00366161	61	0.00481032	69	0.00468939	1	0.491634	0.397385	0.167714	-0.0153932	45.0296	0.985602	113	0.00560927	71	0.00451215	86	0.0053282	90	0.00514987	1	0.413816	0.680268	0.383413	-0.00871023	79.5785	0.776789
ENSMUSG00000047669	male-specific lethal 3-like 2 (Drosophila)	NM_001163833	Msl3l2	100	0.00855729	99	0.00775888	91	0.00933447	96.6667	0.00855021	1	0.616582	0.25595	0.197987	-0.0153767	45.0778	0.947992	108	0.00695841	89	0.00734453	113	0.00909149	103.333	0.00779814	1	0.90004	0.607737	0.105722	-0.0160145	43.2825	0.913203
ENSMUSG00000055560	zinc finger protein 459	NM_177811	Zfp459	45	0.00244999	22	0.00103203	31	0.00196911	32.6667	0.00181704	1	0.538614	0.172168	0.250127	-0.0153658	45.1097	0.826634	215	0.00892802	97	0.00514895	168	0.0086981	160	0.00759169	1	0.544102	0.56556	0.517209	-0.00696148	99.5689	0.810609
ENSMUSG00000049969	pleckstrin homology domain containing, family F (with FYVE domain) member 2	NM_175175	Plekhf2	367	0.0184149	305	0.0138557	342	0.020576	338	0.0176155	1	0.582568	0.26044	0.199757	-0.015355	45.1413	0.948896	591	0.0223874	475	0.0230291	470	0.0222084	512	0.0225416	1	0.62556	0.394642	0.374088	-0.00993924	69.7384	0.910179
ENSMUSG00000039005	toll-like receptor 4	NM_021297	Tlr4	159	0.00411994	65	0.00156513	117	0.00366284	113.667	0.00311597	1	0.367194	0.367279	0.188972	-0.0153488	45.1596	0.930903	2	2.63566e-05	0	-1.7621e-06	0	-6.37076e-06	0.666667	6.07457e-06	1	0.684113	-29.0714	-3.53827	N/A	N/A	N/A
ENSMUSG00000045237	RIKEN cDNA 1110012L19 gene; predicted gene 8512	NM_026787	1110012L19Rik	386	0.0647076	236	0.0358503	299	0.0601096	307	0.0535558	1	0.544224	0.493035	0.148109	-0.0153364	45.1961	0.984021	467	0.0589879	344	0.0556566	368	0.0580203	393	0.057555	1	0.794874	0.611661	0.369335	-0.0082491	84.027	0.999713
ENSMUSG00000063586	ENSMUSG00000063586		Gm5513	1	0.000147535	0	-8.06871e-06	2	0.000364306	1	0.000167924	1	0.885708	0.0472791	0.423736	-0.0153322	45.2085	0.441437	8	0.000908487	3	0.000435449	0	-6.33635e-07	3.66667	0.000447768	1	0.145846	0.240627	-222.54	N/A	N/A	N/A
ENSMUSG00000055373	fucosyltransferase 9	NM_010243	Fut9	7	7.73887e-05	8	8.19485e-05	12	0.000160359	9	0.000106565	1	0.746352	0.46147	0.141952	-0.0153148	45.2601	0.986175	5	4.14979e-05	2	2.12351e-05	2	2.05266e-05	3	2.77532e-05	1	0.701511	-0.00866874	-0.00282138	N/A	N/A	N/A
ENSMUSG00000000617	glutamate receptor, metabotropic 6	NM_173372	Grm6	6	8.2404e-05	5	6.3811e-05	10	0.000165785	7	0.000104	1	1.01668	0.122468	0.255065	-0.0153146	45.2605	0.70625	0	-2.53977e-07	0	-7.18413e-08	1	1.261e-05	0.333333	4.09471e-06	1	1.04946	0.529503	1.01294	-0.00186023	372.614	0.16079
ENSMUSG00000001741	interleukin 16	NM_010551	Il16	182	0.00234052	174	0.00207885	162	0.00251684	172.667	0.00231207	1	0.512331	0.299182	0.194165	-0.015299	45.3067	0.963801	0	-7.21368e-06	2	2.24203e-05	1	7.69995e-06	1	7.63553e-06	1	0.528848	0.263588	7.67038	0.00769154	>Capzb	0.176511
ENSMUSG00000040035	dispatched homolog 2 (Drosophila)	NM_170593	Disp2	2	2.45253e-05	1	1.1395e-05	6	8.88914e-05	3	4.16039e-05	1	0.435721	0.612341	0.141748	-0.0152801	45.3626	0.929474	0	-7.55893e-08	0	-1.2829e-08	0	-1.54608e-07	0	-8.10088e-08	1	0.449768	2.64752	0.207342	-0.00816717	84.8699	0.310366
ENSMUSG00000043602	zinc finger protein 3	NM_177565	Zfp3	103	0.00914341	81	0.00654376	89	0.00946801	91	0.00838506	1	0.421853	0.339023	0.192224	-0.0152744	45.3797	0.951449	148	0.00991081	103	0.0088291	123	0.0102776	124.667	0.00967251	1	0.482297	0.391585	0.284169	-0.0121223	57.1795	0.927714
ENSMUSG00000089886				8	0.00255592	15	0.00440829	9	0.00344123	10.6667	0.00346848	1	1.19951	0.205371	0.190546	-0.0152626	45.4149	0.83269	12	0.00289295	11	0.00339203	14	0.00421167	12.3333	0.00349888	1	0.583142	0.590198	0.213901	-0.0123221	56.2526	0.973609
ENSMUSG00000081953	ENSMUSG00000081953			5	0.000899511	0	-3.22483e-06	4	0.000847275	3	0.000581187	1	1.56764	0.141837	0.214567	-0.0152589	45.4257	0.689145	9	0.00122329	1	0.000174037	14	0.00237537	8	0.00125757	1	1.16882	0.721882	0.428056	-0.00617427	112.264	0.847152
ENSMUSG00000059555	RIKEN cDNA A830007P12 gene	NM_146115	Tor4a	107	0.00441751	104	0.00378432	111	0.00540188	107.333	0.00453457	1	0.653454	0.459948	0.148982	-0.0152294	45.5139	0.994188	551	0.0173691	350	0.0141014	487	0.0191374	462.667	0.0168693	1	0.732523	0.430598	0.168123	-0.0144899	47.8365	0.995506
ENSMUSG00000042377	family with sequence similarity 83, member G	NM_178618	Fam83g	24	0.00055694	19	0.000255233	31	0.000791382	24.6667	0.000534519	1	0.62979	0.493381	0.1452	-0.0152284	45.5167	0.987957	738	0.0140638	424	0.0103232	592	0.0140599	584.667	0.0128156	1	0.608693	0.478373	0.274967	-0.0113263	61.1979	0.986769
ENSMUSG00000090125		NM_011141		37	0.00214816	49	0.00224462	41	0.00256041	42.3333	0.00231773	1	0.663517	0.256871	0.198628	-0.0152283	45.517	0.947023	661	0.0303684	489	0.0287043	725	0.0415153	625	0.0335293	1	0.709697	0.459055	0.342984	-0.00981011	70.6564	0.97328
ENSMUSG00000073658	crystallin, gamma B	NM_144761	Crygb	4	0.00122121	2	0.000567398	5	0.00184426	3.66667	0.00121096	1	0.871442	0.30617	0.170098	-0.0152228	45.5335	0.960965	0	-3.76387e-06	0	-6.38802e-07	0	-3.20771e-06	0	-2.53679e-06	1	0.899536	1.32376	0.248811	-0.00810981	85.4702	0.613864
ENSMUSG00000050107	germ cell-specific gene 2	NM_010353	Gsg2	199	0.0129288	256	0.0153082	255	0.0198888	236.667	0.0160419	1	0.582636	0.227293	0.21835	-0.015222	45.536	0.911948	400	0.0196501	198	0.012434	346	0.0211912	314.667	0.0177584	1	0.359236	0.316269	0.242317	-0.0142796	48.5412	0.879344
ENSMUSG00000032860	purinergic receptor P2Y, G-protein coupled 2	NM_008773	P2ry2	41	0.00145305	38	0.00119187	42	0.00175734	40.3333	0.00146742	1	0.675649	0.369986	0.164952	-0.0152207	45.5397	0.997419	128	0.00344292	110	0.00378339	151	0.00506522	129.667	0.00409717	1	0.804405	0.465541	0.198378	-0.013043	53.1433	0.989773
ENSMUSG00000042854	transformation related protein 53 regulating kinase	NM_023815	Trp53rk	102	0.0028011	84	0.00210587	93	0.00305625	93	0.00265441	1	0.460209	0.296237	0.203108	-0.0152148	45.5574	0.946334	151	0.00312874	94	0.00249267	145	0.00374924	130	0.00312355	1	0.495884	0.406189	0.172001	-0.0151497	45.7532	0.985379
ENSMUSG00000027739	RAB33B, member of RAS oncogene family	NM_016858	Rab33b	643	0.0372604	446	0.0238928	592	0.0413686	560.333	0.034174	1	0.609684	0.346148	0.175541	-0.0152002	45.6012	0.993007	258	0.0111638	144	0.00801505	202	0.0109331	201.333	0.0100373	1	0.520331	0.497968	0.237171	-0.0123867	55.9589	0.971942
ENSMUSG00000079043	FAST kinase domains 5	NM_198176,NM_001146084		187	0.00629234	95	0.00289362	121	0.00487185	134.333	0.00468594	1	0.432129	0.349515	0.190902	-0.0151832	45.6521	0.957307	217	0.00550033	143	0.00464355	178	0.00563413	179.333	0.00525933	1	0.555655	0.38792	0.291754	-0.0117602	58.9403	0.947252
ENSMUSG00000054893	zinc finger protein 667	NM_001024928	Zfp667	316	0.00469248	156	0.00210773	244	0.00436117	238.667	0.00372046	1	0.459571	0.375616	0.181595	-0.0151742	45.6793	0.972781	289	0.00322753	189	0.00270618	175	0.00243897	217.667	0.00279089	1	0.567119	0.457317	0.3598	-0.00987424	70.1975	0.931288
ENSMUSG00000049792	BCL2-associated athanogene 5; similar to BCL2-associated athanogene 5	NM_027404	Bag5	885	0.0331869	731	0.0250336	790	0.035569	802	0.0312632	1	0.59749	0.358999	0.174033	-0.0151713	45.688	0.995012	1218	0.0344446	794	0.0287421	905	0.031928	972.333	0.0317049	1	0.610835	0.483543	0.292491	-0.0108944	63.6244	0.982913
ENSMUSG00000041241	mitochondrial ubiquitin ligase activator of NFKB 1	NM_026689	Mul1	433	0.00970479	470	0.00954308	420	0.0112453	441	0.0101644	1	0.688408	0.29897	0.184102	-0.0151703	45.6912	0.975021	979	0.0166063	759	0.0164661	839	0.0177484	859	0.0169403	1	0.6643	0.350341	0.217762	-0.0136573	50.7527	0.981692
ENSMUSG00000052372	interleukin 1 receptor accessory protein-like 1	NM_001160403	Il1rapl1	34	0.000475136	18	0.000233744	32	0.000540272	28	0.000416384	1	0.512474	0.340189	0.186045	-0.015162	45.716	0.979044	0	-1.46441e-06	0	-2.63159e-07	0	-9.39691e-07	0	-8.89087e-07	1	-7.88371	1.47084	0.272137	N/A	N/A	N/A
ENSMUSG00000071531	G protein regulated inducer of neurite outgrowth 2	NM_183209	Gprin2	5	0.000570369	8	0.00084486	9	0.00123459	7.33333	0.000883274	1	1.04527	0.22876	0.189993	-0.0151571	45.7309	0.87967	11	0.000949462	4	0.000440934	11	0.0011833	8.66667	0.0008579	1	0.743825	1.62561	0.272344	-0.00718561	96.4632	0.48419
ENSMUSG00000053414	similar to putative serine/threonine protein kinase MAK-V; similar to hormonally upregulated Neu-associated kinase; hormonally upregulated Neu-associated kinase	NM_015755	Hunk	1675	0.0611261	2158	0.0718889	1978	0.0866504	1937	0.0732218	1	0.787096	0.292745	0.180394	-0.0151536	45.7415	0.964569	3722	0.102783	2641	0.0932595	2830	0.0974222	3064.33	0.0978216	1	0.760207	0.463431	0.261122	-0.0114023	60.7903	0.994947
ENSMUSG00000068859	trans-acting transcription factor 9	NM_001005343	Sp9	45	0.00159853	55	0.00181562	49	0.0021027	49.6667	0.00183895	1	0.638991	0.244837	0.20832	-0.015138	45.7887	0.933132	1	2.18443e-05	0	-2.04411e-06	1	2.97061e-05	0.666667	1.65021e-05	1	1.28492	-23.0972	-0.0375149	N/A	N/A	N/A
ENSMUSG00000087355				7	0.000595458	4	0.000314668	4	0.00041109	5	0.000440405	1	0.373475	0.307647	0.212623	-0.0151356	45.7957	0.910254	0	-1.83526e-06	1	8.15389e-05	0	-7.15006e-07	0.333333	2.63295e-05	1	0.385515	-0.00577916	0.311013	N/A	N/A	N/A
ENSMUSG00000039903	RIKEN cDNA 4931408A02 gene; similar to Protein C21orf63 homolog precursor	NM_027627,NM_001199210	Eva1c	18	0.000307731	21	0.000333665	11	0.000227237	16.6667	0.000289545	1	0.581048	0.116636	0.309269	-0.0151341	45.8004	0.688341	1	1.19369e-05	0	-3.75656e-07	0	-3.95232e-07	0.333333	3.72201e-06	1	-0.0476559	0.504289	0.452383	N/A	N/A	N/A
ENSMUSG00000042745	inhibitor of DNA binding 1	NM_010495	Id1	1022	0.0895683	956	0.0775199	1107	0.117075	1028.33	0.0947211	1	0.420759	0.346428	0.195032	-0.0151178	45.8497	0.950381	479	0.0313991	277	0.0233131	312	0.0255086	356	0.0267403	1	0.525883	1.26307	0.691376	-0.00262201	264.358	0.2152
ENSMUSG00000049232	tigger transposable element derived 2	NM_001081145	Tigd2	303	0.01846	253	0.0140872	286	0.0209566	280.667	0.0178346	1	0.648622	0.395285	0.163865	-0.0151175	45.8506	0.999792	252	0.0115387	246	0.0144448	223	0.0127515	240.333	0.0129117	1	0.836419	0.479908	0.336138	-0.00953632	72.685	0.976859
ENSMUSG00000059395	NFKB activating protein-like	NM_025719	Nkapl	34	0.0042774	26	0.0029926	20	0.00301247	26.6667	0.00342749	1	0.460122	0.43062	0.171258	-0.0151105	45.8717	0.974973	39	0.00369565	25	0.00303383	28	0.00331319	30.6667	0.00334756	1	0.570261	0.344822	0.213935	-0.0140626	49.2901	0.97661
ENSMUSG00000079144	RIKEN cDNA A130010J15 gene	NM_181048,NM_001160359,NM_001160360		333	0.00610633	216	0.0035151	292	0.00638722	280.333	0.00533622	1	0.537945	0.377539	0.176191	-0.0150999	45.9042	0.991197	995	0.0138419	592	0.0105313	697	0.0120892	761.333	0.0121541	1	0.667962	0.501968	0.303787	-0.0103931	66.6928	0.992306
ENSMUSG00000087291				3	0.000117811	6	0.00021982	3	0.000142535	4	0.000160055	1	1.1687	0.100563	0.2821	-0.0150794	45.9665	0.62268	8	0.00023809	1	3.78305e-05	2	7.40445e-05	3.66667	0.000116655	1	0.144613	2.90358	1.50158	0.00289568	>Capzb	0.0314395
ENSMUSG00000056718	ENSMUSG00000056718		Gm13199	54	0.00725537	28	0.00338529	19	0.00300513	33.6667	0.00454859	1	0.239288	0.133338	0.364408	-0.0150758	45.9775	0.602983	98	0.00994875	53	0.00688516	67	0.00849038	72.6667	0.00844143	1	0.537824	0.381265	0.447096	-0.00915662	75.699	0.807475
ENSMUSG00000022280	ring finger protein 19A	NM_013923	Rnf19a	1619	0.0695253	1046	0.0413276	1300	0.0672498	1321.67	0.0593676	1	0.623191	0.356363	0.17563	-0.0150699	45.9956	0.99502	954	0.0307075	624	0.0257916	679	0.0273106	752.333	0.0279366	1	0.687002	0.579015	0.312032	-0.00972519	71.2734	0.995334
ENSMUSG00000047108	DnaJ (Hsp40) homolog, subfamily B, member 7	NM_021317	Dnajb7	2	0.00030719	3	0.000423367	4	0.000738618	3	0.000489725	1	0.864197	0.205333	0.213878	-0.0150502	46.0558	0.872527	6	0.000699169	3	0.000446722	6	0.000871228	5	0.000672373	1	1.17022	0.721707	0.332907	-0.00776928	89.2164	0.850841
ENSMUSG00000005483	DnaJ (Hsp40) homolog, subfamily B, member 1	NM_018808	Dnajb1	1727	0.1396	1639	0.120777	1711	0.165832	1692.33	0.14207	1	0.778898	0.392209	0.15884	-0.0150496	46.0576	0.990081	2814	0.171738	1985	0.155013	2364	0.179963	2387.67	0.168905	1	0.699815	0.45823	0.148986	-0.0151323	45.8059	0.992334
ENSMUSG00000005505	kelch repeat and BTB (POZ) domain containing 4	NM_025991	Kbtbd4	1004	0.0296112	633	0.017105	834	0.0295875	823.667	0.0254346	1	0.572277	0.358456	0.179788	-0.015038	46.093	0.991972	861	0.0190892	537	0.0152631	645	0.0178553	681	0.0174025	1	0.54735	0.447604	0.381214	-0.00963165	71.9656	0.904041
ENSMUSG00000060244	RNA and export factor binding protein 2	NM_019484	Alyref2	48	0.00691589	29	0.00382807	49	0.00850804	42	0.00641733	1	0.616516	0.577304	0.139061	-0.0150378	46.0937	0.96524	21	0.00226149	23	0.00318972	21	0.00283013	21.6667	0.00276045	1	0.837478	0.530915	0.237949	-0.0114071	60.7647	0.986255
ENSMUSG00000082458	ENSMUSG00000082458			80	0.00958632	3	0.000318036	64	0.00922087	49	0.00637507	1	0.46698	0.429297	0.173045	-0.0150309	46.1147	0.976659	102	0.00921281	8	0.000925689	61	0.0068723	57	0.00567026	1	0.58525	0.0895525	0.393231	-0.0144365	48.0134	0.564297
ENSMUSG00000065526	ENSMUSG00000065526		Mir337	1	0.00190619	5	0.00888036	13	0.0300192	6.33333	0.0136019	1	0.873785	0.244392	0.196267	-0.0150254	46.1317	0.916684	1	0.00143447	0	-9.99792e-06	0	-5.22122e-05	0.333333	0.000457419	1	-0.00369407	-131.8	0.287089	N/A	N/A	N/A
ENSMUSG00000078872	ENSMUSG00000078872			5	0.000271459	9	0.000445814	4	0.000262089	6	0.000326454	1	0.169738	0.484353	0.210058	-0.0150236	46.1372	0.698686	2	8.10785e-05	9	0.000470408	1	5.05872e-05	4	0.000200691	1	2.95297	0.318945	4.02776	0.0069368	>Capzb	0.205788
ENSMUSG00000078580	RIKEN cDNA E430018J23 gene; RIKEN cDNA 9130019O22 gene	NM_198011		98	0.00300051	106	0.00296347	91	0.0033336	98.3333	0.0030992	1	0.576278	0.270349	0.207224	-0.0150207	46.146	0.949284	237	0.00549473	131	0.00388318	170	0.00491436	179.333	0.00476409	1	0.55771	0.385067	0.305467	-0.0114861	60.3466	0.938068
ENSMUSG00000050188	U7 snRNP-specific Sm-like protein LSM10	NM_001163266,NM_138721	Lsm10	356	0.0310658	339	0.0271701	335	0.0351516	343.333	0.0311292	1	0.574179	0.377837	0.175993	-0.015001	46.2066	0.995253	358	0.0235102	252	0.021197	288	0.0236053	299.333	0.0227708	1	0.643947	0.519756	0.187062	-0.0134194	51.6528	0.991697
ENSMUSG00000037640	similar to Zinc finger protein 60; zinc finger protein 60	NM_029531,NM_009560	Zfp60	1164	0.0139793	619	0.00677549	1024	0.0147518	935.667	0.0118355	1	0.435851	0.315465	0.206796	-0.0149872	46.2492	0.942442	1311	0.0118579	714	0.00827254	1205	0.0136066	1076.67	0.0112457	1	0.589441	0.491574	0.359781	-0.00958397	72.3236	0.949308
ENSMUSG00000016526	dual-specificity tyrosine-(Y)-phosphorylation regulated kinase 3	NM_145508	Dyrk3	38	0.00333169	38	0.00296224	33	0.00340651	36.3333	0.00323348	1	0.411611	0.305571	0.213147	-0.0149872	46.2494	0.926305	161	0.0107495	107	0.00913193	140	0.0116543	136	0.0105119	1	0.341427	0.0940042	0.0640719	-0.0266579	26.0016	0.939541
ENSMUSG00000064696	ENSMUSG00000064696		Gm24148	6	0.013917	3	0.00643336	5	0.0138612	4.66667	0.0114038	1	0.577793	0.408116	0.169731	-0.0149763	46.2828	0.997549	3	0.00520797	1	0.00222875	7	0.0152449	3.66667	0.00756053	1	1.96088	2.16696	0.571157	-3.22585e-05	21487.2	1.44065e-05
ENSMUSG00000037692	AT hook, DNA binding motif, containing 1	NM_146155	Ahdc1	625	0.00363752	879	0.00466127	796	0.00553191	766.667	0.00461023	1	0.713735	0.224113	0.217328	-0.0149744	46.2889	0.905491	2423	0.0107274	1358	0.00768352	2025	0.0111751	1935.33	0.009862	1	0.6604	0.457872	0.285507	-0.0110971	62.4618	0.988895
ENSMUSG00000027498	cleavage stimulation factor, 3' pre-RNA, subunit 1	NM_024199	Cstf1	1288	0.0571538	1245	0.0503188	1109	0.0589222	1214	0.055465	1	0.643344	0.33052	0.183713	-0.0149726	46.2942	0.987391	2322	0.077848	1593	0.0683257	1769	0.0739768	1894.67	0.0733835	1	0.624127	0.457794	0.276625	-0.011388	60.8664	0.98668
ENSMUSG00000087535				7	0.000369863	11	0.00053829	10	0.000635728	9.33333	0.000514627	1	0.37216	0.222597	0.256695	-0.0149725	46.2947	0.83348	5	0.00019833	3	0.000152288	7	0.000346918	5	0.000232512	1	0.703731	1.2041	-0.00119675	N/A	N/A	N/A
ENSMUSG00000055069	RAB39, member RAS oncogene family	NM_175562	Rab39	19	0.00117421	12	0.000685826	9	0.000666839	13.3333	0.000842292	1	0.365927	0.102321	0.380237	-0.0149721	46.2958	0.593174	0	-3.61903e-06	3	0.000177716	8	0.000463162	3.66667	0.000212419	1	-59.8396	0.239752	0.248891	N/A	N/A	N/A
ENSMUSG00000095809		NM_146262		0	-2.62242e-06	0	-6.97912e-06	0	-6.10816e-06	0	-5.23656e-06	1	1.05898	0.0709186	0.350223	-0.0149712	46.2986	0.522565	5	0.00073707	2	0.000376647	3	0.000551145	3.33333	0.000554954	1	0.701909	0.360941	0.998623	-0.00380562	182.138	0.235214
ENSMUSG00000052135	forkhead box O6	NM_194060	Foxo6	29	0.00200646	24	0.00141572	24	0.00193816	25.6667	0.00178678	1	0.402627	0.436889	0.1798	-0.0149675	46.31	0.949842	159	0.00840766	120	0.00811062	134	0.00883362	137.667	0.00845064	1	1.08204	0.703604	0.357755	-0.00751723	92.2078	0.900224
ENSMUSG00000053536	cleavage stimulation factor, 3' pre-RNA subunit 2, tau	NM_031249	Cstf2t	2225	0.108655	1496	0.0669435	1967	0.11548	1896	0.097026	1	0.62747	0.374404	0.174072	-0.0149588	46.3371	0.997713	1852	0.0679717	1253	0.0589629	1629	0.0746755	1578	0.0672033	1	0.639202	0.387889	0.221216	-0.0132954	52.1345	0.990453
ENSMUSG00000046031	family with sequence similarity 26, member F	NM_175449	Fam26f	9	0.00150861	5	0.000632939	3	0.000549599	5.66667	0.000897051	1	0.765209	0.120358	0.293386	-0.0149321	46.4199	0.695599	51	0.00653701	52	0.00852013	38	0.00607345	47	0.00704353	1	0.917613	0.666367	0.578179	-0.00490364	141.354	0.96219
ENSMUSG00000065305	ENSMUSG00000065305		Gm23246	44	0.121668	30	0.0749225	32	0.106121	35.3333	0.100904	1	0.673666	0.313423	0.187856	-0.0149266	46.4371	0.97976	88	0.183989	52	0.139089	47	0.122529	62.3333	0.148536	1	0.411526	0.485357	0.127263	-0.016793	41.2758	0.958506
ENSMUSG00000050921	purinergic receptor P2Y, G-protein coupled 10	NM_172435	P2ry10	7	0.000153987	3	6.13247e-05	8	0.000212618	6	0.000142643	1	0.622459	1.02057	0.106311	-0.0149189	46.4611	0.801421	0	-4.74601e-07	0	-6.90421e-08	0	-3.69804e-07	0	-3.04482e-07	1	0.642526	4.41253	0.155507	-0.00780591	88.7978	0.196427
ENSMUSG00000041483	zinc finger protein 281	NM_001160251,NM_177643	Zfp281	1147	0.0212645	809	0.0137266	1040	0.023123	998.667	0.0193714	1	0.458349	0.269531	0.22351	-0.0149134	46.478	0.919332	1347	0.0188128	767	0.0137171	1265	0.0220545	1126.33	0.0181948	1	0.578774	0.50467	0.345015	-0.00979558	70.7612	0.954915
ENSMUSG00000050555	hydrolethalus syndrome 1	NM_029762	Hyls1	735	0.0226446	388	0.0108957	573	0.0212222	565.333	0.0182542	1	0.427939	0.379312	0.191713	-0.014912	46.4824	0.957692	673	0.0155938	435	0.0129216	493	0.0142628	533.667	0.0142594	1	0.624847	0.681147	0.454188	-0.00697647	99.355	0.927792
ENSMUSG00000050505	protocadherin 20	NM_178685	Pcdh20	489	0.0171424	303	0.00986991	321	0.0135956	371	0.013536	1	0.598783	0.499192	0.153671	-0.0149113	46.4845	0.987953	3	2.64202e-05	1	2.26372e-05	0	-2.36467e-05	1.33333	8.47023e-06	1	-0.06628	0.0167854	0.224782	N/A	N/A	N/A
ENSMUSG00000093107				12	0.0174124	7	0.00926457	22	0.0384484	13.6667	0.0217085	1	0.504624	0.534649	0.155119	-0.0149055	46.5026	0.969166	16	0.0175048	8	0.011205	17	0.0231828	13.6667	0.0172976	1	1.02515	0.449446	0.234996	-0.0116943	59.2724	0.944196
ENSMUSG00000062944	RIKEN cDNA 9130023H24 gene	NM_177001	9130023H24Rik	75	0.00380991	100	0.00463282	99	0.00604064	91.3333	0.00482779	1	0.98622	0.255492	0.190286	-0.0148887	46.5551	0.907783	248	0.00956693	142	0.00700132	168	0.00807608	186	0.00821478	1	0.759136	0.472313	0.291285	-0.0106502	65.0831	0.992472
ENSMUSG00000062743	zinc finger protein 677; hypothetical protein LOC100044270	NM_172486	Zfp677	150	0.00471433	82	0.00233446	104	0.00391638	112	0.00365506	1	0.502279	0.265358	0.221678	-0.01487	46.6139	0.927887	193	0.00457238	122	0.00370148	141	0.00416942	152	0.00414776	1	0.940847	0.638684	0.418021	-0.00705804	98.2068	0.975156
ENSMUSG00000004791	placental growth factor	NM_008827	Pgf	329	0.0383139	256	0.0276262	259	0.0363995	281.333	0.0341132	1	0.574335	0.436423	0.16757	-0.0148543	46.6629	0.996241	46	0.00392036	42	0.00467939	45	0.00486016	44.3333	0.00448664	1	1.18722	0.454611	0.289059	-0.0101103	68.5583	0.881647
ENSMUSG00000045441	GPRIN family member 3	NM_183183	Gprin3	16	0.000947637	11	0.000605401	8	0.000571831	11.6667	0.00070829	1	0.54406	0.278337	0.212852	-0.0148495	46.6782	0.94721	0	-2.9207e-06	0	-6.81588e-07	1	5.46288e-05	0.333333	1.70088e-05	1	-35.1924	1.20342	-0.00566846	N/A	N/A	N/A
ENSMUSG00000070697	UTP3, small subunit (SSU) processome component, homolog (S. cerevisiae)	NM_023054	Utp3	1932	0.220863	1569	0.163759	1600	0.21978	1700.33	0.201467	1	0.572515	0.33412	0.191876	-0.0148474	46.6848	0.983034	2266	0.195148	1682	0.185512	1592	0.171077	1846.67	0.183913	1	0.543455	0.337096	0.198666	-0.0146811	47.2135	0.977788
ENSMUSG00000051675	tripartite motif-containing 32; RIKEN cDNA 3632413A11 gene	NM_001161782,NM_053084	Trim32	1384	0.0334724	1222	0.0269976	1251	0.036287	1285.67	0.0322523	1	0.646027	0.325951	0.188792	-0.0148371	46.7172	0.984344	2292	0.0418565	1357	0.031706	1700	0.0387223	1783	0.0374283	1	0.61593	0.404932	0.257264	-0.0122592	56.5409	0.981035
ENSMUSG00000027088	phosphatase, orphan 2	NM_028521	Phospho2	635	0.0117179	339	0.00568798	442	0.00978346	472	0.0090631	1	0.514447	0.387873	0.18341	-0.0148301	46.7393	0.986108	673	0.00934942	429	0.00763657	513	0.00889885	538.333	0.00862828	1	0.704658	0.561092	0.348604	-0.00908104	76.329	0.994638
ENSMUSG00000041598	CDC42 effector protein (Rho GTPase binding) 4	NM_001163346,NM_020006	Cdc42ep4	1969	0.0467898	2132	0.0465413	2063	0.0589218	2054.67	0.050751	1	0.833232	0.335065	0.174953	-0.014829	46.7427	0.973834	2610	0.0467614	1657	0.03799	2085	0.0465949	2117.33	0.0437821	1	0.661852	0.469161	0.178002	-0.0140161	49.4535	0.99756
ENSMUSG00000050064	zinc finger protein 697	NM_172863	Zfp697	142	0.00262969	113	0.00190344	142	0.0031462	132.333	0.00255978	1	0.533786	0.243164	0.229636	-0.0148267	46.7499	0.911517	262	0.00366645	153	0.00273916	241	0.00420687	218.667	0.00353749	1	0.3702	0.310822	0.256807	-0.0139183	49.8013	0.871526
ENSMUSG00000019826	zinc finger and BTB domain containing 24	NM_153398	Zbtb24	393	0.0254447	323	0.0190396	337	0.0261674	351	0.0235506	1	0.530843	0.271966	0.218101	-0.0148074	46.811	0.938533	672	0.03286	416	0.0260274	465	0.0283591	517.667	0.0290822	1	0.544874	0.42453	0.367316	-0.0100427	69.0203	0.905186
ENSMUSG00000034968	ladybird homeobox homolog 2 (Drosophila)	NM_010692	Lbx2	6	0.000817187	7	0.000886717	5	0.000822059	6	0.000841988	1	0.579113	0.436997	0.168578	-0.0147989	46.8376	0.996606	2	0.000202939	0	-9.98306e-07	1	0.000126595	1	0.000109512	1	1.76912	-93.0085	3.02695	N/A	N/A	N/A
ENSMUSG00000061544	zinc finger protein	NM_001164676	Zfp229	385	0.0155638	263	0.00967316	393	0.019086	347	0.0147743	1	0.514839	0.30366	0.208502	-0.0147918	46.8603	0.957395	629	0.0191982	345	0.0134748	456	0.0173553	476.667	0.0166761	1	0.528187	0.405196	0.381203	-0.0100044	69.2843	0.878352
ENSMUSG00000047842	DIRAS family, GTP-binding RAS-like 2	NM_001024474	Diras2	4	0.000159143	3	8.45577e-05	6	0.000274408	4.33333	0.000172703	1	0.409647	0.804314	0.135658	-0.0147912	46.8621	0.855319	86	0.0027357	44	0.00178829	72	0.00285436	67.3333	0.00245945	1	0.571344	0.623294	0.554856	-0.00612925	113.088	0.80339
ENSMUSG00000092417		NM_032460,NM_001128597		108	0.00457293	131	0.00505124	82	0.00415177	107	0.00459198	1	0.450655	0.323493	0.209047	-0.0147857	46.8795	0.947931	190	0.00607722	168	0.00687493	142	0.00566624	166.667	0.00620613	1	0.467943	0.480497	0.288315	-0.0114287	60.6497	0.927816
ENSMUSG00000020607	family with sequence similarity 84, member A	NM_029007	Fam84a	43	0.00218515	72	0.00304205	54	0.0031704	56.3333	0.0027992	1	0.898465	0.203393	0.223116	-0.0147501	46.9928	0.857005	1038	0.0424947	612	0.032009	662	0.033775	770.667	0.0360929	1	0.526252	0.261794	0.140261	-0.017745	39.0615	0.981012
ENSMUSG00000051062	fibrillarin-like 1	NM_001004147	Fbll1	3	0.00036624	6	0.000678473	6	0.000884951	5	0.000643221	1	0.871442	0.511922	0.141748	-0.0147485	46.9977	0.959593	0	-1.12878e-06	1	0.000116763	0	-1.53919e-06	0.333333	3.80318e-05	1	0.899536	-0.0144795	0.207342	N/A	N/A	N/A
ENSMUSG00000044501	hypothetical protein LOC100044280; zinc finger protein 758	NM_145484	Zfp758	435	0.0074879	193	0.00304511	310	0.006426	312.667	0.005653	1	0.503812	0.346598	0.197748	-0.0147425	47.0169	0.973498	280	0.00361534	154	0.00255301	179	0.00288757	204.333	0.00301864	1	0.728293	0.453292	0.441324	-0.00820857	84.4419	0.912482
ENSMUSG00000007777	RIKEN cDNA 0610009B22 gene	NM_025319	0610009B22Rik	439	0.0472157	295	0.0288021	353	0.0455383	362.333	0.0405187	1	0.538122	0.473814	0.166407	-0.014741	47.0218	0.987736	481	0.0389546	399	0.0414025	415	0.0419627	431.667	0.0407733	1	0.766899	0.675579	0.428678	-0.00704439	98.3971	0.995906
ENSMUSG00000006143	RIKEN cDNA 2310043J07 gene	NM_027158	Upk3bl	0	-2.59982e-05	5	9.53276e-05	11	0.00040733	5.33333	0.000158886	1	1.71325	1.78824	0.0641298	-0.0147405	47.0232	0.502475	273	0.00730718	110	0.00376118	175	0.00583674	186	0.00563503	1	1.13557	2.30988	2.06598	0.00746658	>Capzb	0.847302
ENSMUSG00000055026	gamma-aminobutyric acid (GABA) A receptor, subunit gamma 3	NM_008074	Gabrg3	3	4.16064e-05	5	6.29537e-05	0	-3.23947e-06	2.66667	3.37736e-05	1	0.276998	0.50124	0.191031	-0.0147403	47.024	0.844072	22	0.000234413	11	0.000149742	22	0.000292301	18.3333	0.000225486	1	0.638288	1.1808	0.544704	-0.00404228	171.474	0.516206
ENSMUSG00000049858	sulfite oxidase	NM_173733	Suox	522	0.0406836	489	0.0348303	455	0.0425313	488.667	0.0393484	1	0.693221	0.414387	0.167451	-0.0147247	47.0737	0.998517	766	0.0450418	519	0.0390559	591	0.0433554	625.333	0.0424844	1	0.67185	0.569048	0.199311	-0.0126617	54.7437	0.984584
ENSMUSG00000036894	RAP2B, member of RAS oncogene family	NM_028712	Rap2b	556	0.0242122	415	0.0164967	554	0.0289582	508.333	0.0232224	1	0.823581	0.299885	0.188562	-0.014724	47.076	0.95926	862	0.0283313	470	0.0197675	682	0.027958	671.333	0.0253523	1	0.679471	0.406184	0.196069	-0.0138182	50.1617	0.998123
ENSMUSG00000008193	Spi-B transcription factor (Spi-1/PU.1 related)	NM_019866	Spib	5	0.000150011	6	0.000130335	7	0.000252256	6	0.000177534	1	0.637801	0.209873	0.240287	-0.0147237	47.0771	0.876793	153	0.00376793	89	0.00280022	71	0.0021789	104.333	0.00291568	1	0.90226	0.965219	0.773674	-0.00190488	363.88	0.882873
ENSMUSG00000072620	schlafen 2	NM_011408	Slfn2	86	0.00949447	87	0.00892328	83	0.0110707	85.3333	0.00982948	1	0.455932	0.380126	0.194654	-0.014708	47.1272	0.966404	0	-2.92628e-05	1	9.62375e-05	0	-1.92551e-05	0.333333	1.59065e-05	1	-2.85532	0.625676	-5.0926	N/A	N/A	N/A
ENSMUSG00000044952	potassium channel tetramerisation domain containing 21	NM_001039039	Kctd21	131	0.00809361	136	0.00774384	103	0.00764999	123.333	0.00782915	1	0.677547	0.254122	0.215804	-0.0147027	47.1443	0.932882	96	0.00445353	72	0.00428222	83	0.00481216	83.6667	0.00451597	1	0.780345	0.299161	0.155972	-0.016022	43.2621	0.976151
ENSMUSG00000014074	ring finger protein 168	NM_027355	Rnf168	1570	0.0298133	1157	0.0199646	1481	0.0337582	1402.67	0.0278454	1	0.710184	0.375174	0.175923	-0.0146886	47.1896	0.99509	2277	0.0326195	1562	0.0286442	1773	0.0316842	1870.67	0.0309827	1	0.709442	0.465869	0.288439	-0.0108636	63.8046	0.992658
ENSMUSG00000022306	zinc finger protein, multitype 2	NM_011766	Zfpm2	138	0.0050986	131	0.00449513	100	0.00446242	123	0.00468538	1	0.788881	0.289731	0.19562	-0.0146684	47.2545	0.956175	3	6.78174e-05	4	0.000137222	4	0.000131039	3.66667	0.000112026	1	7.01587	2.19932	0.511943	0.00134334	>Capzb	0.00701073
ENSMUSG00000087819				40	0.0511666	15	0.0171067	29	0.0445154	28	0.0375962	1	0.326022	0.552941	0.17676	-0.0146629	47.2721	0.881385	46	0.0443217	34	0.0419799	33	0.039689	37.6667	0.0419969	1	0.38163	0.21132	0.272381	-0.0147211	47.0853	0.81339
ENSMUSG00000076313	ENSMUSG00000076313		Mir665	3	0.00591891	3	0.0055001	6	0.014302	4	0.00857365	1	1.45083	0.408227	0.141748	-0.014658	47.288	0.853444	0	-1.82426e-05	0	-6.19226e-06	0	-2.48753e-05	0	-1.64367e-05	1	-93.8464	1.76501	0.207342	N/A	N/A	N/A
ENSMUSG00000071633	predicted gene 4952	NM_001013762,NM_001167907	Gm4952	3	0.000350387	3	0.000325594	4	0.000564431	3.33333	0.000413471	1	1.16192	0.204114	0.212623	-0.0146366	47.3573	0.818836	0	-1.07993e-06	0	-3.66569e-07	0	-9.81711e-07	0	-8.09402e-07	1	1.19938	0.882506	0.311013	-0.00752358	92.13	0.757281
ENSMUSG00000045382	chemokine (C-X-C motif) receptor 4	NM_009911	Cxcr4	347	0.0235439	316	0.0198918	337	0.0276022	333.333	0.0236793	1	0.662976	0.341023	0.189283	-0.014636	47.3591	0.988215	62	0.00309907	34	0.00219954	51	0.00320334	49	0.00283398	1	0.466731	1.80807	0.532462	-0.00333088	208.097	0.157825
ENSMUSG00000027995	toll-like receptor 2	NM_011905	Tlr2	304	0.0185212	210	0.0118608	238	0.0175016	250.667	0.0159612	1	0.47827	0.432378	0.182411	-0.0146356	47.3602	0.977382	63	0.002837	32	0.00186458	42	0.00237404	45.6667	0.00235854	1	0.861423	0.759107	0.213315	-0.0109212	63.4683	0.907068
ENSMUSG00000046269	ubiquitin specific peptidase 27, X chromosome; similar to gamma-aminobutyric acid A receptor, epsilon	NM_019461	Usp27x	166	0.00257998	173	0.00247877	188	0.00351324	175.667	0.00285733	1	0.676716	0.277836	0.208876	-0.0146286	47.3831	0.952738	130	0.00151785	90	0.00134666	150	0.00218795	123.333	0.00168415	1	0.602417	0.519952	0.272869	-0.0111268	62.2951	0.986741
ENSMUSG00000043702	RIKEN cDNA E430028B21 gene	NM_178668	Pde12	865	0.0204716	618	0.0132496	670	0.0189994	717.667	0.0175735	1	0.583407	0.35311	0.192614	-0.0146176	47.4187	0.988158	1289	0.0230182	934	0.0213507	949	0.0211445	1057.33	0.0218378	1	0.705454	0.514815	0.330498	-0.00969115	71.5237	0.992563
ENSMUSG00000066704	cytochrome P450, family 2, subfamily b, polypeptide 19	NM_007814	Cyp2b19	0	-3.50778e-07	0	-1.16692e-06	0	-3.40431e-07	0	-6.19376e-07	1	1.32373	0.0709186	0.350223	-0.014617	47.4205	0.493543	4	9.85913e-05	2	6.29758e-05	1	3.07174e-05	2.33333	6.40949e-05	1	0.877386	0.360941	0.998623	-0.00345143	200.829	0.213294
ENSMUSG00000048349	POU domain, class 4, transcription factor 1	NM_011143	Pou4f1	5	0.000199149	7	0.000255201	21	0.00101197	11	0.000488774	1	0.518464	0.531567	0.161744	-0.0146154	47.4259	0.972927	8	0.000240542	7	0.00026928	7	0.000261211	7.33333	0.000257011	1	1.02486	0.926675	0.716521	-0.00231927	298.864	0.865055
ENSMUSG00000043895	sphingosine-1-phosphate receptor 2	NM_010333	S1pr2	1920	0.125075	2072	0.124886	1808	0.141964	1933.33	0.130642	1	0.811511	0.341254	0.180521	-0.0146139	47.4307	0.977298	933	0.0454761	604	0.0377878	761	0.0463711	766	0.0432117	1	0.77814	0.465961	0.23474	-0.0120242	57.6459	0.994941
ENSMUSG00000055994	nucleotide-binding oligomerization domain containing 2	NM_145857	Nod2	25	0.000276029	24	0.000245569	23	0.000306167	24	0.000275922	1	1.08046	0.281214	0.185383	-0.0146051	47.4592	0.904789	12	9.91236e-05	5	5.2939e-05	9	9.29116e-05	8.66667	8.16581e-05	1	0.777015	0.719305	0.110041	-0.0154585	44.8393	0.895652
ENSMUSG00000037973	coiled-coil domain containing 129	NM_001081665	Ccdc129	4	0.000109923	4	9.27495e-05	7	0.000233605	5	0.000145426	1	1.30969	0.675717	0.114103	-0.0145981	47.4821	0.815618	46	0.000982593	25	0.000682339	21	0.000558819	30.6667	0.00074125	1	0.813617	0.750428	1.142	-0.000395802	1751.25	0.0207619
ENSMUSG00000081683	frizzled homolog 10 (Drosophila)	NM_175284		658	0.038031	812	0.0357341	703	0.0443958	724.333	0.0393869	1	0.780652	0.299363	0.195243	-0.0145934	47.4972	0.961943	14504	0.671295	9688	0.572883	12164	0.701669	12118.7	0.648616	1	0.629573	0.434799	0.154411	-0.0152397	45.483	0.99813
ENSMUSG00000046668	CXXC finger 5	NM_133687	Cxxc5	425	0.0342533	477	0.0353214	525	0.0509284	475.667	0.0401677	1	0.911358	0.345089	0.175678	-0.0145669	47.5838	0.962877	600	0.0364745	373	0.0290114	459	0.034786	477.333	0.033424	1	0.795071	0.528967	0.228373	-0.011762	58.9308	0.990801
ENSMUSG00000048895	cyclin-dependent kinase 5, regulatory subunit 1 (p35)	NM_009871	Cdk5r1	373	0.0142798	372	0.0132067	395	0.0182498	380	0.0152454	1	0.691396	0.248781	0.221787	-0.0145644	47.5919	0.92381	82	0.00232308	51	0.00186589	77	0.00273835	70	0.00230911	1	0.626091	0.833205	0.61286	-0.00443125	156.423	0.753862
ENSMUSG00000028838	exostoses (multiple)-like 1	NM_019578	Extl1	11	0.00034235	11	0.000139364	15	0.000490894	12.3333	0.000324203	1	0.649585	0.494782	0.159969	-0.0145552	47.6218	0.991031	507	0.0135666	353	0.0120678	413	0.0137728	424.333	0.0131358	1	0.770672	0.730046	0.577923	-0.00489373	141.64	0.96817
ENSMUSG00000056019	zinc finger protein 709	NM_145624	Zfp709	174	0.0146293	80	0.00614702	126	0.0127289	126.667	0.0111684	1	0.505354	0.325901	0.210047	-0.01455	47.6389	0.96235	130	0.00820811	77	0.00623805	109	0.00860184	105.333	0.00768267	1	0.494786	0.439556	0.29314	-0.0115175	60.1821	0.936706
ENSMUSG00000032656	membrane-associated ring finger (C3HC4) 3	NM_177115	2003-03-01	81	0.00204599	50	0.00116244	50	0.00152383	60.3333	0.00157742	1	0.590652	0.382346	0.186564	-0.0145481	47.6452	0.994922	38	0.000717935	28	0.000680431	15	0.000353631	27	0.000583999	1	0.957371	0.668431	1.13822	-0.000525941	1317.92	0.028896
ENSMUSG00000017499	cell division cycle 6 homolog (S. cerevisiae); predicted gene 9430; similar to cell division cycle 6 homolog	NM_001025779,NM_011799	Cdc6	1781	0.0257902	1296	0.0171273	1353	0.0235168	1476.67	0.0221447	1	0.523735	0.379164	0.193689	-0.0145275	47.7126	0.984089	2153	0.0234915	1422	0.0198689	1527	0.0207932	1700.67	0.0213845	1	0.609877	0.502999	0.344115	-0.00973961	71.1679	0.96663
ENSMUSG00000034173	SCAN domain containing 3	NM_183088	2410018M08Rik	147	0.00837902	123	0.00644467	138	0.00948146	136	0.00810172	1	0.521081	0.447135	0.17873	-0.0145225	47.7293	0.987225	103	0.00440682	81	0.00444594	67	0.00357689	83.6667	0.00414322	1	0.556635	0.639567	0.5079	-0.00665025	104.229	0.834234
ENSMUSG00000041773	ectodermal-neural cortex 1	NM_007930	Enc1	1185	0.0454997	1367	0.0475397	1345	0.0618592	1299	0.0516329	1	0.817657	0.258789	0.210247	-0.0145122	47.763	0.925745	3675	0.107088	2379	0.0886224	2623	0.0952709	2892.33	0.0969936	1	0.608327	0.380068	0.332017	-0.0108605	63.8226	0.929413
ENSMUSG00000045092	sphingosine-1-phosphate receptor 1	NM_007901	S1pr1	599	0.036309	561	0.0315953	595	0.0435694	585	0.0371579	1	0.909252	0.3406	0.178695	-0.014504	47.79	0.961617	2	-2.05479e-05	4	0.000197852	8	0.000379645	4.66667	0.00018565	1	-2.69039	-0.264759	-0.0521746	N/A	N/A	N/A
ENSMUSG00000078779	zinc finger protein 59; predicted gene 7452	NM_011762		209	0.0195421	129	0.0110077	151	0.0169544	163	0.0158348	1	0.38273	0.365269	0.214305	-0.0145017	47.7975	0.922325	173	0.0121569	135	0.0121668	145	0.0127318	151	0.0123518	1	0.514507	0.715658	0.517004	-0.0063055	109.927	0.759998
ENSMUSG00000033669	zinc finger protein 7	NM_145916	Zfp7	485	0.0320964	276	0.0166159	427	0.033946	396	0.0275527	1	0.568773	0.34588	0.199822	-0.0144903	47.8352	0.982603	562	0.0280159	346	0.0220937	435	0.027061	447.667	0.0257235	1	0.549401	0.399656	0.360575	-0.0103388	67.0432	0.901735
ENSMUSG00000034640	TCDD-inducible poly(ADP-ribose) polymerase	NM_178892	Tiparp	1187	0.0415537	707	0.0225485	903	0.0378908	932.333	0.0339977	1	0.449326	0.317437	0.22148	-0.0144836	47.8574	0.937502	1298	0.0342152	827	0.027928	1131	0.0372275	1085.33	0.0331236	1	0.625178	0.53345	0.344392	-0.00950857	72.8971	0.975449
ENSMUSG00000037017	zinc finger and SCAN domain containing 21	NM_001044704,NM_001044705,NM_011757,NM_001044703	Zscan21	1579	0.0220961	892	0.0114279	1253	0.0210939	1241.33	0.018206	1	0.49403	0.334098	0.21089	-0.0144817	47.8637	0.961689	1260	0.0132477	784	0.0105717	928	0.0121854	990.667	0.0120016	1	0.644098	0.522798	0.389797	-0.00873895	79.317	0.96113
ENSMUSG00000041607	myelin basic protein	NM_001025245,NM_001025251,NM_001025255,NM_001025254,NM_010777,NM_001025258,NM_001025256,NM_001025259	Mbp	71	0.000398086	92	0.000423758	68	0.000429991	77	0.000417278	1	0.693642	0.385619	0.181233	-0.01445	47.9687	0.996807	1240	0.00549546	754	0.00426937	870	0.00480544	954.667	0.00485676	1	0.717943	0.468995	0.358145	-0.00944915	73.3555	0.971256
ENSMUSG00000021510	RIKEN cDNA A530054K11 gene	NM_183146	A530054K11Rik	516	0.0182307	275	0.00882399	482	0.0204569	424.333	0.0158372	1	0.484736	0.335894	0.212505	-0.0144464	47.9806	0.958929	681	0.0181397	374	0.0127562	516	0.0171466	523.667	0.0160142	1	0.630846	0.472129	0.369771	-0.00943045	73.501	0.952177
ENSMUSG00000066438	RIKEN cDNA 3830431G21 gene	NM_001177503	Plekhd1	2	6.7448e-05	5	0.000155182	3	0.000120827	3.33333	0.000114486	1	1.30868	0.120254	0.277382	-0.0144392	48.0044	0.635218	13	0.000336034	7	0.000231121	10	0.000322127	10	0.000296427	1	0.809555	1.03165	1.39873	0.00189415	>Capzb	0.428602
ENSMUSG00000020601	tribbles homolog 2 (Drosophila)	NM_144551	Trib2	1336	0.0489663	1431	0.0486378	1363	0.0602575	1376.67	0.0526206	1	0.682762	0.252107	0.225581	-0.0144345	48.0203	0.924043	324	0.00880379	200	0.00700675	357	0.0121916	293.667	0.00933403	1	0.626936	0.337056	0.234156	-0.0134111	51.6846	0.968932
ENSMUSG00000085982				6	0.000249306	5	0.000191087	5	0.00024874	5.33333	0.000229711	1	0.143856	0.988407	0.169436	-0.0143863	48.181	0.565984	3	9.32948e-05	3	0.000119951	6	0.000234018	4	0.000149088	1	0.785094	1.19763	0.666528	-0.00238722	290.357	0.421331
ENSMUSG00000078870	predicted gene 2007; predicted gene 4724; predicted gene 14410; predicted gene, OTTMUSG00000016609; RIKEN cDNA 0610010B08 gene; RIKEN cDNA 3100002L24 gene; predicted gene 14308; predicted gene 14326; predicted gene 14434; predicted gene, 100043387; predicted gene 4631; predicted gene 14430			30	0.00203402	25	0.00156234	34	0.00277204	29.6667	0.0021228	1	0.695865	0.121487	0.326075	-0.0143826	48.1936	0.670518	30	0.00153066	14	0.00091451	29	0.00184672	24.3333	0.00143063	1	0.780146	1.0839	0.585688	-0.00353494	196.084	0.666546
ENSMUSG00000085984				10	0.000837794	4	0.000303007	8	0.000806031	7.33333	0.000648944	1	0.258605	0.470069	0.212487	-0.0143773	48.2112	0.814252	7	0.000440194	6	0.000484499	6	0.000471575	6.33333	0.000465423	1	1.17514	0.480164	0.66681	-0.00464582	149.198	0.559975
ENSMUSG00000022863	predicted gene 7334; B-cell translocation gene 3; similar to BTG3	NM_009770	Btg3	7	0.000693802	7	0.000633789	10	0.00119608	8	0.000841224	1	1.11894	0.354378	0.169778	-0.0143737	48.2232	0.922412	6	0.000447042	7	0.000668753	4	0.000371112	5.66667	0.000495636	1	1.16991	0.617783	0.751781	-0.00309135	224.222	0.534394
ENSMUSG00000048012	zinc finger protein 473	NM_178734	Zfp473	43	0.000309574	33	0.000196603	42	0.000350724	39.3333	0.000285634	1	0.663996	0.47803	0.166556	-0.0143736	48.2237	0.994777	323	0.00178746	219	0.00154885	289	0.00199358	277	0.00177663	1	0.59755	0.385424	0.255709	-0.0125025	55.4405	0.973787
ENSMUSG00000020644	inhibitor of DNA binding 2	NM_010496	Id2	1945	0.28144	1320	0.176602	1554	0.271024	1606.33	0.243022	1	0.512161	0.484256	0.176747	-0.0143675	48.244	0.981013	603	0.0649404	400	0.0555687	578	0.0781409	527	0.0662166	1	0.659395	1.28749	0.530318	-0.00388596	178.372	0.446233
ENSMUSG00000049625	TRAF-interacting protein with forkhead-associated domain, family member B	NM_145976,NM_001168615	Tifab	85	0.00446191	77	0.00375643	67	0.00424967	76.3333	0.004156	1	0.502424	0.485101	0.177714	-0.0143578	48.2767	0.978544	4	0.0001445	0	-4.22916e-06	0	-7.39141e-06	1.33333	4.42932e-05	1	-0.0493569	2.09738	0.259951	N/A	N/A	N/A
ENSMUSG00000066838	cDNA sequence BC023179	NM_145577	Zfp772	307	0.0203106	207	0.0125022	257	0.0204351	257	0.0177493	1	0.489312	0.314441	0.222265	-0.0143559	48.2831	0.947468	266	0.01323	214	0.0136476	224	0.0139146	234.667	0.0135974	1	0.828327	0.616547	0.428248	-0.00721873	96.0207	0.99628
ENSMUSG00000074671	TSPY-like 3	NM_198617	Tspyl3	277	0.0165545	277	0.0152294	266	0.0190949	273.333	0.0169596	1	0.82099	0.303376	0.199315	-0.0143401	48.3362	0.956585	310	0.0139524	187	0.0107742	271	0.0152229	256	0.0133165	1	0.56881	0.469624	0.217253	-0.0129883	53.367	0.990051
ENSMUSG00000031487	BRF2, subunit of RNA polymerase III transcription initiation factor, BRF1-like	NM_025686	Brf2	158	0.0209332	210	0.0255163	153	0.0242727	173.667	0.0235741	1	0.744987	0.29313	0.207969	-0.0143335	48.3584	0.956741	252	0.0252036	189	0.0241813	233	0.0290737	224.667	0.0261529	1	0.430864	0.178224	0.0939867	-0.0218251	31.7592	0.970655
ENSMUSG00000048351	RIKEN cDNA 2010305A19 gene	NM_027250	Selrc1	537	0.0171776	449	0.0131693	485	0.0186421	490.333	0.0163296	1	0.56039	0.361816	0.201005	-0.0143334	48.3588	0.984752	562	0.0135326	375	0.0115658	462	0.0138858	466.333	0.0129948	1	0.630919	0.410478	0.19214	-0.0140311	49.4009	0.998631
ENSMUSG00000057156	homeodomain leucine zipper-encoding gene	NM_183174,NM_001177705	Homez	106	0.00169893	107	0.00155139	93	0.00177181	102	0.00167404	1	0.590331	0.264198	0.232552	-0.0143234	48.3926	0.928271	294	0.00357236	188	0.00292081	253	0.0038337	245	0.00344229	1	0.533081	0.337422	0.185392	-0.0151477	45.7593	0.981982
ENSMUSG00000041842	FH2 domain containing 1	NM_001033301,NM_001205355	Fhdc1	94	0.00188054	128	0.00228598	106	0.00251509	109.333	0.0022272	1	0.894818	0.359671	0.179911	-0.0143134	48.4264	0.967973	771	0.0118792	403	0.00793359	491	0.00942815	555	0.00974698	1	0.726692	0.547804	0.270509	-0.0107186	64.6676	0.999006
ENSMUSG00000094417				39	0.0126582	10	0.00297667	48	0.018775	32.3333	0.01147	1	0.623954	0.30818	0.212774	-0.014311	48.4346	0.967021	34	0.00829658	8	0.00250223	27	0.00821677	23	0.00633853	1	0.895762	0.90178	0.518631	-0.0046716	148.375	0.90876
ENSMUSG00000052013	B and T lymphocyte associated	NM_177584,NM_001037719	Btla	14	0.000396788	7	0.000184356	9	0.000307585	10	0.000296243	1	0.496953	0.436997	0.18936	-0.0143037	48.4593	0.980565	0	-1.22294e-06	0	-2.07556e-07	2	5.26999e-05	0.666667	1.70898e-05	1	-60.7796	-93.0085	-0.00281181	N/A	N/A	N/A
ENSMUSG00000020525	similar to Protein phosphatase 1D magnesium-dependent, delta; protein phosphatase 1D magnesium-dependent, delta isoform	NM_016910	Ppm1d	506	0.0252852	389	0.0177253	430	0.0257678	441.667	0.0229261	1	0.718157	0.40683	0.179088	-0.0143005	48.4702	0.997081	816	0.0307838	465	0.022447	584	0.0274813	621.667	0.0269041	1	0.741186	0.517412	0.247925	-0.011422	60.6854	0.99873
ENSMUSG00000093319				8	0.00647114	6	0.00448318	10	0.00968211	8	0.00687881	1	0.869917	0.100755	0.343122	-0.0142987	48.4763	0.600868	11	0.00671015	3	0.00233978	15	0.0114204	9.66667	0.00682345	1	0.850653	1.2048	0.332628	-0.00665404	104.169	0.657631
ENSMUSG00000091623				14	0.00366608	14	0.00331209	13	0.00408845	13.6667	0.00368887	1	0.498945	0.224644	0.264086	-0.0142979	48.4791	0.861284	35	0.00694208	25	0.00634123	19	0.00469706	26.3333	0.00599346	1	0.233511	0.25946	0.209972	-0.0165015	42.005	0.807683
ENSMUSG00000082334	ENSMUSG00000082334			4	0.000506909	2	0.000233887	7	0.00107331	4.33333	0.0006047	1	0.654153	0.924664	0.121648	-0.0142977	48.4796	0.835536	4	0.000381465	1	0.000122066	1	0.000117469	2	0.000207	1	0.290892	1.43826	-0.00282779	N/A	N/A	N/A
ENSMUSG00000090024				2	0.000816542	1	0.000369272	6	0.00297847	3	0.0013881	1	0.86532	0.6198	0.139027	-0.0142758	48.5541	0.929743	9	0.00280031	2	0.000795276	4	0.00154726	5	0.00171428	1	0.909891	2.16538	1.75278	0.00586599	>Capzb	0.706305
ENSMUSG00000036959	BCL6 co-repressor-like 1	NM_178782	Bcorl1	316	0.00235565	395	0.00271157	396	0.00355299	369	0.0028734	1	0.674519	0.28505	0.218304	-0.0142721	48.5667	0.951414	646	0.00364175	297	0.00214014	425	0.00298563	456	0.00292251	1	0.582884	0.424202	0.19477	-0.013966	49.6309	0.995525
ENSMUSG00000084823				5	0.00124877	3	0.000641438	7	0.00209006	5	0.00132676	1	1.22213	0.669606	0.122929	-0.0142637	48.5952	0.836848	22	0.00418624	14	0.00340563	18	0.00426879	18	0.00395355	1	0.690745	0.154108	0.166427	-0.0179095	38.7028	0.885024
ENSMUSG00000028850	similar to Gpatc3 protein; G patch domain containing 3	NM_172876	Gpatch3	84	0.00621786	112	0.00760397	107	0.00951256	101	0.00777813	1	0.81835	0.370979	0.183175	-0.0142428	48.6666	0.981977	225	0.0126226	117	0.00838936	162	0.0113268	168	0.0107796	1	0.654823	0.702456	0.444094	-0.00694701	99.7763	0.947296
ENSMUSG00000051220	excision repair cross-complementing rodent repair deficiency complementation group 6 - like	NM_146235	Ercc6l	1794	0.0619019	1030	0.0322412	1356	0.0561578	1393.33	0.0501003	1	0.482558	0.42841	0.194803	-0.0142335	48.6984	0.975478	2224	0.0578316	1448	0.0482241	1551	0.0503307	1741	0.0521288	1	0.569902	0.42867	0.267169	-0.0119618	57.9468	0.974252
ENSMUSG00000025645	coiled-coil domain containing 51	NM_025689	Ccdc51	244	0.0186412	146	0.0100798	185	0.0169415	191.667	0.0152208	1	0.501694	0.338385	0.217139	-0.0142314	48.7055	0.961221	330	0.0190107	236	0.0174094	246	0.0176851	270.667	0.0180351	1	0.677571	0.565299	0.353234	-0.00903577	76.7114	0.989313
ENSMUSG00000040749	seven in absentia 1B	NM_009173	Siah1b	315	0.0134037	264	0.0101159	320	0.016306	299.667	0.0132752	1	0.739901	0.477846	0.165862	-0.0142295	48.7121	0.990421	711	0.0228966	506	0.0208429	550	0.0220847	589	0.0219414	1	0.656299	0.501326	0.26512	-0.0112896	61.3972	0.99681
ENSMUSG00000087026				26	0.00122821	21	0.000904098	24	0.00135443	23.6667	0.00116224	1	0.265493	0.266398	0.287165	-0.0142262	48.7234	0.755168	63	0.00225358	28	0.00128067	49	0.00218571	46.6667	0.00190665	1	0.445942	0.56673	0.223972	-0.0125845	55.0793	0.931485
ENSMUSG00000065087	small nucleolar RNA, C/D box 22		Snord22	166	0.242654	120	0.158027	92	0.159841	126	0.186841	1	0.771293	0.408178	0.177949	-0.0142172	48.7542	0.992185	258	0.284647	216	0.305062	217	0.298872	230.333	0.296194	1	0.575273	0.580828	0.184009	-0.0133502	51.9205	0.971764
ENSMUSG00000058152	chondroitin sulfate synthase 3	NM_001081328	Chsy3	98	0.00612296	91	0.00523538	89	0.00667627	92.6667	0.00601154	1	0.790728	0.481788	0.162969	-0.0142097	48.78	0.983627	109	0.00512858	57	0.00343286	95	0.00557942	87	0.00471362	1	0.675631	0.74492	0.304984	-0.0090969	76.196	0.947553
ENSMUSG00000056216	CCAAT/enhancer binding protein (C/EBP), gamma	NM_009884	Cebpg	1304	0.0430527	955	0.028558	1165	0.0460843	1141.33	0.0392316	1	0.723052	0.31989	0.204542	-0.0142091	48.7818	0.97276	2846	0.0710935	1542	0.0492682	1907	0.059398	2098.33	0.0599199	1	0.709811	0.480199	0.261259	-0.011395	60.8291	0.998731
ENSMUSG00000086965				59	0.0124681	63	0.0121158	52	0.0130782	58	0.012554	1	0.485875	0.207357	0.280809	-0.0142044	48.7982	0.827293	159	0.0254667	91	0.0186343	133	0.0265651	127.667	0.0235554	1	0.463464	0.459783	0.44303	-0.00885635	78.2656	0.797892
ENSMUSG00000047603	zinc finger protein 235	NM_019941	Zfp235	242	0.017995	152	0.0103418	204	0.0182349	199.333	0.0155239	1	0.527385	0.309417	0.225257	-0.0142032	48.8023	0.951491	203	0.0113456	139	0.00996133	172	0.012007	171.333	0.0111046	1	0.929679	0.632773	0.592906	-0.00488742	141.823	0.92515
ENSMUSG00000033319	fem-1 homolog c (C.elegans)	NM_173423	Fem1c	1174	0.0375213	990	0.029032	1179	0.0453232	1114.33	0.0372921	1	0.580866	0.267012	0.236722	-0.0142026	48.8043	0.9265	1379	0.0332022	809	0.0249375	1035	0.0310853	1074.33	0.0297417	1	0.613387	0.416639	0.359928	-0.0100432	69.0164	0.930108
ENSMUSG00000049878	rearranged L-myc fusion sequence	NM_001081013	Rlf	2045	0.0280993	1456	0.0182539	1836	0.0302973	1779	0.0255501	1	0.604835	0.3928	0.193299	-0.0141997	48.8144	0.995727	2782	0.0288255	1645	0.0218193	2042	0.0263945	2156.33	0.0256797	1	0.605469	0.420519	0.236116	-0.0127111	54.5308	0.989648
ENSMUSG00000055835	zinc finger protein 1	NM_001037665,NM_011742	Zfp1	445	0.0435822	304	0.0270859	400	0.0469615	383	0.0392099	1	0.532411	0.426087	0.191625	-0.0141991	48.8163	0.988473	576	0.0425251	386	0.0364903	521	0.0480058	494.333	0.0423404	1	0.774509	0.681642	0.479529	-0.00628862	110.222	0.993495
ENSMUSG00000031734	Iroquois related homeobox 3 (Drosophila)	NM_001253822,NM_008393	Irx3	1927	0.0691379	2095	0.0693022	1837	0.0793471	1953	0.0725957	1	0.820715	0.326303	0.196543	-0.0141983	48.819	0.967028	1560	0.0420573	1086	0.0375145	1214	0.0408571	1286.67	0.040143	1	0.566257	0.406052	0.207849	-0.0137381	50.4542	0.989881
ENSMUSG00000036168	coiled-coil domain containing 38	NM_175488	Ccdc38	4	0.000106942	5	0.000121145	7	0.000224466	5.33333	0.000150851	1	0.440147	0.125723	0.370448	-0.0141907	48.8451	0.638626	15	0.000304953	9	0.000233863	14	0.000354702	12.6667	0.000297839	1	-0.000491064	0.160195	0.070813	N/A	N/A	N/A
ENSMUSG00000046879	immunity-related GTPase family M member 1	NM_008326	Irgm1	129	0.00324322	86	0.00200456	95	0.00288345	103.333	0.00271041	1	0.574228	0.470807	0.17915	-0.0141897	48.8488	0.993071	8	0.000141598	11	0.000264028	10	0.000231139	9.66667	0.000212255	1	0.271262	0.578282	0.198374	-0.0140801	49.2289	0.811236
ENSMUSG00000038068	ring finger protein 144B	NM_001170643,NM_146042	Rnf144b	127	0.002495	130	0.00214477	145	0.00337382	134	0.0026712	1	0.858563	0.441163	0.167501	-0.0141845	48.8666	0.978694	1216	0.0184692	809	0.0157014	755	0.0142911	926.667	0.0161539	1	0.724349	0.507513	0.269839	-0.010982	63.1167	0.999788
ENSMUSG00000063739	similar to 40S ribosomal protein S25; predicted gene 6988; predicted gene 10206; ribosomal protein S25; predicted gene 6029; predicted gene 4963; predicted gene 7926; predicted gene 2225		Gm4963	1	0.000482786	4	0.00180037	3	0.00175897	2.66667	0.00134737	1	0.864197	0.153823	0.283305	-0.0141822	48.8744	0.743021	3	0.00109883	1	0.000466524	1	0.000454026	1.66667	0.000673125	1	1.17022	-0.00288958	1.00257	N/A	N/A	N/A
ENSMUSG00000020397	mediator complex subunit 7	NM_025426,NM_001104530,NM_001104556,NM_001104557	Med7	795	0.015345	525	0.00926794	649	0.0150546	656.333	0.0132225	1	0.598437	0.371438	0.199946	-0.0141794	48.8842	0.990699	691	0.0100272	494	0.00919053	572	0.0103669	585.667	0.00986154	1	0.726795	0.423899	0.286306	-0.0111721	62.0428	0.981825
ENSMUSG00000063047	zinc finger protein 780B	NM_001081021	Zfp780b	255	0.0155652	120	0.00671865	186	0.0136251	187	0.0119697	1	0.443704	0.340008	0.225259	-0.0141781	48.8886	0.939081	190	0.00870931	93	0.00546839	187	0.0107177	156.667	0.00829845	1	0.480373	0.627574	0.245468	-0.0115609	59.9564	0.92614
ENSMUSG00000043432	leukocyte receptor cluster (LRC) member 9	NM_175529	Leng9	46	0.00498619	53	0.00529604	52	0.0068001	50.3333	0.00569411	1	0.737585	0.348966	0.196344	-0.0141611	48.9473	0.984193	38	0.00309557	28	0.00292241	22	0.00223274	29.3333	0.00275024	1	0.862488	0.591108	0.50044	-0.00629924	110.037	0.964529
ENSMUSG00000090439		NM_001164374		0	-2.30699e-06	0	-3.83729e-06	0	-4.47788e-06	0	-3.54072e-06	1	0.441243	0.141837	0.350223	-0.0141604	48.9497	0.678601	4	0.000648414	1	0.000207089	2	0.000404044	2.33333	0.000419849	1	0.292462	0.721882	0.998623	-0.00299479	231.451	0.104785
ENSMUSG00000094334				0	-1.20876e-06	0	-8.04227e-06	0	-9.38485e-06	0	-6.21196e-06	1	1.76497	0.283674	0.175111	-0.0141604	48.9497	0.766242	1	0.00033974	1	0.000434023	2	0.000846804	1.33333	0.000540189	1	1.16985	1.44376	0.499312	-0.00299479	231.451	0.264096
ENSMUSG00000028636	predicted gene 8465; phosphopantothenoylcysteine synthetase	NM_026494	Ppcs	218	0.0101244	171	0.00714118	170	0.00941921	186.333	0.00889493	1	0.485424	0.479771	0.186239	-0.01415	48.9856	0.973662	388	0.0136132	329	0.0147722	340	0.0148842	352.333	0.0144232	1	0.636486	0.477462	0.343726	-0.00984441	70.4102	0.968575
ENSMUSG00000095325		NM_207245		354	0.0126639	214	0.00706801	315	0.0135895	294.333	0.0111072	1	0.403206	0.302	0.245997	-0.0141472	48.9955	0.895216	156	0.0041715	85	0.00292288	110	0.00367641	117	0.00359027	1	0.556222	0.498882	0.417981	-0.00867719	79.8815	0.895798
ENSMUSG00000038508	growth differentiation factor 15	NM_011819	Gdf15	1	6.28378e-05	3	0.000175174	0	-1.30809e-06	1.33333	7.89013e-05	1	0.871442	0.405504	0.175111	-0.0141463	48.9984	0.977477	0	-1.93672e-07	0	-1.97219e-07	2	0.000118031	0.666667	3.92132e-05	1	0.899536	-662.532	0.499312	N/A	N/A	N/A
ENSMUSG00000041124	RIKEN cDNA 8430410K20 gene; hypothetical protein LOC100044209	NM_145609	Msantd4	2690	0.18062	1454	0.089747	1941	0.156995	2028.33	0.142454	1	0.496938	0.443614	0.192696	-0.0141452	49.0024	0.979421	1356	0.068149	914	0.0590606	965	0.0606614	1078.33	0.0626237	1	0.65335	0.415242	0.324098	-0.0106195	65.2713	0.958757
ENSMUSG00000034459	interferon-induced protein with tetratricopeptide repeats 1	NM_008331	Ifit1	5	0.000324917	4	0.000181743	6	0.000463023	5	0.000323228	1	0.503915	0.182766	0.299228	-0.0141439	49.0069	0.785415	112	0.00583417	61	0.0040598	53	0.00344043	75.3333	0.0044448	1	0.543144	0.414177	0.263749	-0.0122291	56.6802	0.966071
ENSMUSG00000029392	Rab interacting lysosomal protein-like 1	NM_021430	Rilpl1	466	0.0381008	486	0.0366964	467	0.0460322	473	0.0402765	1	0.687414	0.354771	0.198784	-0.0141421	49.013	0.988405	323	0.019821	203	0.015967	216	0.0165366	247.333	0.0174416	1	0.72809	0.545085	0.370247	-0.00873857	79.3204	0.991155
ENSMUSG00000081189	predicted gene 12725			7	0.000770488	5	0.000511407	4	0.000531926	5.33333	0.000604607	1	0.124492	0.734809	0.211868	-0.014138	49.0271	0.551985	0	-2.37471e-06	0	-5.75765e-07	0	-9.25175e-07	0	-1.29188e-06	1	0.128505	3.17702	-111.27	N/A	N/A	N/A
ENSMUSG00000081274	predicted gene 15727			5	0.00208475	7	0.00269372	9	0.00451743	7	0.00309863	1	0.864217	0.352013	0.188637	-0.0141362	49.0334	0.970062	13	0.00410695	5	0.00201806	11	0.00432975	9.66667	0.00348492	1	1.2604	1.00987	0.636146	-0.00247339	280.242	0.447706
ENSMUSG00000053716	dual specificity phosphatase 7; similar to dual specificity phosphatase 7	NM_153459	Dusp7	1475	0.0523726	1517	0.0494592	1420	0.0605916	1470.67	0.0541411	1	0.679689	0.360023	0.198088	-0.0141357	49.0353	0.990171	1664	0.0444981	1173	0.0401623	1371	0.0457511	1402.67	0.0434705	1	0.522406	0.458812	0.208864	-0.0134473	51.5453	0.98176
ENSMUSG00000082848	ENSMUSG00000082848			4	0.000675879	5	0.00077509	14	0.00284628	7.66667	0.00143241	1	0.86904	0.372029	0.18349	-0.0141275	49.0637	0.974107	4	0.00050862	4	0.00065155	11	0.00174531	6.33333	0.000968494	1	1.17096	0.359271	-0.000761304	N/A	N/A	N/A
ENSMUSG00000045404	potassium channel, subfamily K, member 13	NM_146037,NM_001164426,NM_001164427	Kcnk13	30	0.000519649	45	0.00072383	31	0.000648861	35.3333	0.00063078	1	1.19103	0.394896	0.164611	-0.0141272	49.0648	0.909165	2	2.45098e-05	2	3.25424e-05	0	-1.12856e-06	1.33333	1.86412e-05	1	0.542805	0.327225	0.240785	-0.0135566	51.13	0.951991
ENSMUSG00000056162	carnosine dipeptidase 1 (metallopeptidase M20 family)	NM_177450	Cndp1	0	-4.23298e-06	0	-3.03985e-05	0	-1.4085e-05	0	-1.62388e-05	1	1.23268	0.13558	0.278881	-0.0141192	49.0926	0.664832	63	0.00118974	68	0.00164054	54	0.0012709	61.6667	0.00136706	1	0.817037	0.690034	0.7952	-0.00295356	234.682	0.713747
ENSMUSG00000026315	serine (or cysteine) peptidase inhibitor, clade B, member 8	NM_011459,NM_001159748	Serpinb8	40	0.00092167	42	0.000703638	40	0.00104762	40.6667	0.000890976	1	0.473306	0.651402	0.161879	-0.0141094	49.1267	0.926965	776	0.0142109	565	0.01322	502	0.0114574	614.333	0.0129628	1	0.945311	0.821423	0.678424	-0.00317715	218.166	0.991637
ENSMUSG00000021886	G-protein coupled receptor 65	NM_008152	Gpr65	104	0.00932221	51	0.0042464	84	0.00909587	79.6667	0.00755483	1	0.49433	0.564527	0.172141	-0.0141045	49.1436	0.959422	0	-2.87319e-05	1	8.15131e-05	1	6.8362e-05	0.666667	4.03811e-05	1	-2.24004	-0.143154	-0.0582713	N/A	N/A	N/A
ENSMUSG00000079906	ENSMUSG00000079906			7	0.00400013	7	0.0036491	10	0.00683548	8	0.00482823	1	1.24491	0.35677	0.172008	-0.0141002	49.1588	0.892838	17	0.00735644	9	0.00497957	19	0.0102518	15	0.00752926	1	0.825	0.400105	0.15757	-0.014946	46.3768	0.98395
ENSMUSG00000081343	ENSMUSG00000081343			0	-8.0752e-06	0	-4.13284e-06	0	-2.89366e-05	0	-1.37149e-05	1	0.950369	0.567349	0.145926	-0.0141001	49.1589	0.932836	13	0.00226965	1	0.000223039	12	0.00261098	8.66667	0.00170122	1	0.629918	2.88753	0.416093	-0.00293452	236.204	0.0772487
ENSMUSG00000085016				19	0.00322486	13	0.0020015	14	0.00280987	15.3333	0.00267875	1	0.453957	0.286893	0.246985	-0.0140964	49.1718	0.907498	20	0.00255542	18	0.00294727	39	0.00622937	25.6667	0.00391069	1	1.40745	0.641217	0.230351	-0.0101898	68.0234	0.794588
ENSMUSG00000027313	ChaC, cation transport regulator-like 1 (E. coli)	NM_026929	Chac1	10	0.00112263	7	0.000728426	8	0.00108417	8.33333	0.000978407	1	0.435365	0.175436	0.319278	-0.0140941	49.1798	0.747253	1	8.11623e-05	1	0.000107285	1	0.000103574	1	9.73404e-05	1	1.20055	-0.00579814	-0.0085027	N/A	N/A	N/A
ENSMUSG00000045757	zinc finger protein 764	NM_146203	Zfp764	166	0.00618454	142	0.00486469	181	0.0081018	163	0.00638368	1	0.571304	0.439999	0.188401	-0.0140929	49.1841	0.994735	226	0.00634932	104	0.00373834	193	0.00676358	174.333	0.00561708	1	0.543371	0.622836	0.398674	-0.00831008	83.4104	0.905176
ENSMUSG00000084370	ENSMUSG00000084370			10	0.001032	4	0.000378562	20	0.00248426	11.3333	0.00129827	1	1.39725	0.153999	0.254805	-0.0140891	49.1974	0.684468	23	0.00179664	4	0.000399446	23	0.00223868	16.6667	0.00147826	1	0.608879	0.541281	0.82583	-0.00395117	175.428	0.447372
ENSMUSG00000024776	STAM binding protein like 1	NM_029682	Stambpl1	650	0.0134312	445	0.00843554	503	0.0125146	532.667	0.0114605	1	0.633103	0.429826	0.185971	-0.0140865	49.2063	0.999664	458	0.00710392	339	0.00674692	308	0.00596661	368.333	0.00660582	1	0.784912	0.575278	0.542449	-0.00602322	115.079	0.928495
ENSMUSG00000044167	forkhead box O1	NM_019739	Foxo1	323	0.0106655	425	0.0130046	406	0.0161762	384.667	0.0132821	1	0.941269	0.294738	0.203554	-0.0140812	49.225	0.929891	169	0.00417836	92	0.00291403	126	0.00388473	129	0.00365904	1	0.773735	0.498301	0.19742	-0.0129195	53.651	0.99103
ENSMUSG00000074794	arrestin domain containing 3	NM_001042591	Arrdc3	2118	0.027681	1616	0.0194109	2636	0.041513	2123.33	0.029535	1	0.614665	0.396675	0.19555	-0.0140694	49.2663	0.996317	1427	0.0139946	1072	0.0134905	1354	0.0165771	1284.33	0.0146874	1	0.571009	0.374262	0.332094	-0.0110084	62.9652	0.917983
ENSMUSG00000031738	Iroquois related homeobox 6 (Drosophila)	NM_022428	Irx6	98	0.003188	133	0.00345405	97	0.00333649	109.333	0.00332618	1	0.741178	0.193327	0.267322	-0.014069	49.2678	0.825657	2180	0.0568218	1331	0.0443235	1993	0.0647447	1834.67	0.0552966	1	0.55537	0.253232	0.12825	-0.0183335	37.8077	0.984867
ENSMUSG00000019789	hairy/enhancer-of-split related with YRPW motif 2	NM_013904	Hey2	515	0.0371273	418	0.0279873	524	0.0456314	485.667	0.0369153	1	0.768174	0.370777	0.191547	-0.0140612	49.2951	0.987253	13	0.000591875	13	0.000870796	15	0.00093628	13.6667	0.00079965	1	1.02794	0.574921	0.265125	-0.0101424	68.3416	0.939436
ENSMUSG00000029570	LFNG O-fucosylpeptide 3-beta-N-acetylglucosaminyltransferase	NM_008494	Lfng	366	0.0292013	402	0.0284878	321	0.0299161	363	0.0292017	1	0.544612	0.308499	0.22914	-0.0140531	49.3235	0.951376	1529	0.0928824	1149	0.0892219	1639	0.12415	1439	0.102085	1	0.539375	0.50609	0.398505	-0.00898345	77.1583	0.901783
ENSMUSG00000031952	carbohydrate (N-acetylglucosamine 6-O) sulfotransferase 5	NM_019950	Chst5	27	0.00251126	27	0.00213943	30	0.00330214	28	0.00265094	1	0.701955	0.766129	0.136683	-0.0140429	49.3591	0.896671	203	0.0145134	143	0.0130654	140	0.0124749	162	0.0133512	1	0.731875	0.741603	0.749227	-0.00327759	211.481	0.751546
ENSMUSG00000034083	predicted gene 8899; RIKEN cDNA C130022K22 gene	NM_172730	Ccdc174	928	0.0133375	578	0.00756568	715	0.0123426	740.333	0.0110819	1	0.526591	0.42188	0.198112	-0.0140367	49.3812	0.985909	885	0.00956871	675	0.00935495	697	0.0094106	752.333	0.00944475	1	0.649483	0.409385	0.342549	-0.0103224	67.1496	0.944734
ENSMUSG00000050926	WD repeat domain 40C	NM_175539	Dcaf12l2	40	0.001549	43	0.00154632	47	0.00219759	43.3333	0.0017643	1	0.784587	0.341786	0.199242	-0.014036	49.3836	0.976282	10	0.000287249	3	0.000110177	7	0.000250929	6.66667	0.000216118	1	0.224396	1.68766	0.140396	-0.0131759	52.6072	0.515782
ENSMUSG00000053390	RIKEN cDNA C920016K16 gene	NM_001045559	Zfp952	488	0.0112528	233	0.0049051	393	0.0109042	371.333	0.00902069	1	0.423895	0.41322	0.212058	-0.0140149	49.4578	0.946301	418	0.00724558	240	0.0053345	289	0.00625397	315.667	0.00627802	1	0.602498	0.591311	0.615999	-0.00554847	124.926	0.758082
ENSMUSG00000063049	inhibitor of growth family, member 2	NM_023503	Ing2	275	0.00872196	281	0.00810931	274	0.0104175	276.667	0.00908291	1	0.822172	0.333035	0.200173	-0.0140145	49.4594	0.968002	554	0.0132861	382	0.011718	418	0.0125002	451.333	0.0125014	1	0.75789	0.492487	0.241222	-0.0117174	59.1555	0.997769
ENSMUSG00000049421	zinc finger protein 260	NM_011981	Zfp260	5206	0.0976849	2607	0.0448845	3832	0.0866191	3881.67	0.0763962	1	0.488654	0.404368	0.206985	-0.0140117	49.4691	0.973003	2914	0.0409655	1909	0.0344858	1953	0.0343171	2258.67	0.0365895	1	0.678525	0.476875	0.359716	-0.00945809	73.2861	0.969365
ENSMUSG00000021986	family with sequence similarity 123, member A	NM_028113	Amer2	14	0.000942198	15	0.00093047	16	0.0012949	15	0.00105586	1	0.934883	0.121875	0.32077	-0.0140079	49.4826	0.647517	18	0.000913147	9	0.00058408	15	0.000949099	14	0.000815442	1	0.388118	0.882941	0.265821	-0.0103098	67.2319	0.753333
ENSMUSG00000041703	similar to zinc finger protein of the cerebellum 5; predicted gene 12241; zinc finger protein of the cerebellum 5	NM_022987	Zic5	8	0.000268451	7	0.000218274	14	0.00056758	9.66667	0.000351435	1	1.0893	0.0874773	0.364496	-0.0140066	49.4871	0.532607	0	-8.2739e-07	0	-2.45743e-07	0	-9.87187e-07	0	-6.86773e-07	1	1.12442	0.378217	0.533166	-0.00689365	100.549	0.663035
ENSMUSG00000086368				4	0.000252525	3	0.000171627	8	0.000606106	5	0.000343419	1	0.432998	0.413282	0.211434	-0.0139994	49.5125	0.950787	11	0.000526432	5	0.000305948	13	0.000775437	9.66667	0.000535939	1	0.531871	1.29908	0.845725	-0.00123536	561.088	0.0582524
ENSMUSG00000077358	ENSMUSG00000077345; ENSMUSG00000077358		Gm26293	10	0.0219823	7	0.0139854	16	0.0421583	11	0.026042	1	0.432478	0.716352	0.160687	-0.0139977	49.5185	0.890929	21	0.0349169	10	0.0212666	25	0.0518307	18.6667	0.0360047	1	0.668911	0.575642	0.199677	-0.0126204	54.9226	0.983054
ENSMUSG00000046311	zinc finger protein 62	NM_009562,NM_001024846	Zfp62	2266	0.0175459	1176	0.00831817	1944	0.0180952	1795.33	0.0146531	1	0.469083	0.367998	0.219698	-0.0139974	49.5198	0.957068	2202	0.0128284	1195	0.00892184	1711	0.0124433	1702.67	0.0113978	1	0.72779	0.548626	0.433939	-0.00771083	89.8927	0.970124
ENSMUSG00000074281	ENSMUSG00000074281		Gm12522	15	0.00112762	14	0.000959747	21	0.00188281	16.6667	0.00132339	1	0.462524	0.219314	0.286726	-0.0139722	49.6091	0.827814	11	0.000620909	15	0.00108663	36	0.00254335	20.6667	0.00141696	1	1.06677	0.962527	0.193889	-0.0104343	66.4294	0.763037
ENSMUSG00000054499	death effector domain-containing DNA binding protein 2	NM_207677	Dedd2	76	0.00753341	67	0.00583371	68	0.00797979	70.3333	0.00711564	1	0.769836	0.38453	0.190682	-0.0139709	49.6138	0.989539	430	0.0325919	241	0.0233457	276	0.0260754	315.667	0.0273376	1	0.440479	0.559824	0.293085	-0.0109355	63.3853	0.898653
ENSMUSG00000033446	purinergic receptor P2Y, G-protein coupled, 5	NM_175116	Lpar6	489	0.0362366	254	0.0170613	432	0.0384356	391.667	0.0305778	1	0.418557	0.342136	0.235443	-0.0139701	49.6164	0.922004	669	0.0373851	372	0.0266169	495	0.0345092	512	0.0328371	1	0.642378	0.466942	0.334877	-0.0100661	68.8595	0.97081
ENSMUSG00000023087	similar to carbon catabolite repression 4 protein homolog; CCR4 carbon catabolite repression 4-like (S. cerevisiae)	NM_009834	Ccrn4l	204	0.00234832	161	0.00167774	156	0.00214043	173.667	0.0020555	1	0.61692	0.338548	0.214835	-0.0139694	49.6189	0.977929	480	0.00418311	268	0.00298697	356	0.0038694	368	0.00367983	1	0.670279	0.503096	0.291714	-0.010638	65.1577	0.994927
ENSMUSG00000000078	Kruppel-like factor 6	NM_011803	Klf6	4455	0.193904	3834	0.154716	3816	0.200505	4035	0.183041	1	0.624045	0.231375	0.259188	-0.0139679	49.6243	0.880506	1044	0.033667	578	0.0240603	631	0.0254606	751	0.0277293	1	0.566762	0.417954	0.323688	-0.0108325	63.9876	0.941418
ENSMUSG00000071362	ENSMUSG00000071362		Gm10330	2	0.000269411	30	0.00370314	0	-5.64617e-06	10.6667	0.0013223	1	0.436279	0.26969	0.262667	-0.0139649	49.6348	0.879135	5	0.000510156	32	0.00417365	4	0.000509459	13.6667	0.00173109	1	0.233616	0.292394	0.748967	-0.00804702	86.1371	0.329887
ENSMUSG00000044092	RIKEN cDNA C130050O18 gene	NM_177000	C130050O18Rik	8	0.000239928	7	0.000195147	9	0.000324652	8	0.000253242	1	0.434092	0.523697	0.188896	-0.0139594	49.6545	0.946234	1	2.18689e-05	0	-2.19706e-07	5	0.000140313	2	5.39873e-05	1	3.61304	-282.429	0.600479	N/A	N/A	N/A
ENSMUSG00000079083	jerky homolog-like (mouse)	NM_001033181		413	0.0255873	221	0.0124007	330	0.0245095	321.333	0.0208325	1	0.432745	0.345104	0.232949	-0.0139574	49.6615	0.930677	552	0.0257858	332	0.0198592	433	0.0252421	439	0.023629	1	0.642739	0.508107	0.412951	-0.00846642	81.8701	0.943423
ENSMUSG00000046997	splA/ryanodine receptor domain and SOCS box containing 4	NM_145134	Spsb4	92	0.00215063	131	0.00284387	136	0.0038401	119.667	0.00294487	1	1.16514	0.402324	0.168799	-0.0139434	49.7115	0.914653	14	0.000240098	7	0.000154395	10	0.00021295	10.3333	0.000202481	1	0.653732	0.384987	0.713224	-0.00585078	118.471	0.536444
ENSMUSG00000085761				3	0.000861642	4	0.00101825	4	0.00139981	3.66667	0.00109323	1	0.862426	0.313476	0.206862	-0.0139221	49.7877	0.951391	19	0.00418076	13	0.00365549	4	0.00109515	12	0.00297713	1	0.92358	0.999421	2.50146	0.0056934	>Capzb	0.723323
ENSMUSG00000049580	tsukushin	NM_001168541,NM_001168540,NM_001024619,NM_001168539	Tsku	636	0.00760853	681	0.00751979	658	0.00947332	658.333	0.00820055	1	0.821864	0.35392	0.19705	-0.0139218	49.7886	0.975355	490	0.00440316	310	0.00356918	454	0.00509484	418	0.00435573	1	0.62432	0.435197	0.281531	-0.0114366	60.6078	0.980708
ENSMUSG00000041216	retinaldehyde binding protein 1-like 1	NM_028940	Clvs1	12	0.000150283	8	9.24498e-05	13	0.000196479	11	0.000146404	1	0.361999	0.537969	0.196527	-0.0139108	49.8278	0.899986	1	8.97652e-06	3	3.60736e-05	2	2.31866e-05	2	2.27456e-05	1	3.67133	1.1999	-0.00423687	N/A	N/A	N/A
ENSMUSG00000044528	translocation associated membrane protein 1-like 1	NM_146140	Tram1l1	468	0.0386161	376	0.0287566	423	0.0421288	422.333	0.0365005	1	0.761516	0.478364	0.173096	-0.0139093	49.8334	0.989819	57	0.00342644	56	0.00441748	62	0.00473281	58.3333	0.00419224	1	0.631025	0.296488	0.0778617	-0.0207987	33.3264	0.996219
ENSMUSG00000032077	BUD13 homolog (yeast)	NM_146000	Bud13	410	0.0106859	511	0.0122121	380	0.0118699	433.667	0.0115893	1	0.706813	0.318054	0.216337	-0.0139075	49.8398	0.968026	697	0.0137194	472	0.0118835	552	0.0135526	573.667	0.0130518	1	0.608968	0.442453	0.280358	-0.0114501	60.5362	0.980138
ENSMUSG00000030031	kelch repeat and BTB (POZ) domain containing 8	NM_001008785,NM_001102670	Kbtbd8	334	0.0060896	163	0.00267987	265	0.00579149	254	0.00485365	1	0.399915	0.319895	0.248901	-0.0139029	49.8563	0.896911	480	0.00660178	283	0.00498353	359	0.00616084	374	0.00591538	1	0.590298	0.392228	0.275244	-0.011999	57.7673	0.965573
ENSMUSG00000043140	transmembrane protein 186	NM_025708	Tmem186	687	0.0458916	512	0.0309055	662	0.0529601	620.333	0.0432524	1	0.614887	0.342149	0.216238	-0.0138997	49.8677	0.978467	1194	0.0602454	856	0.0552713	1026	0.0645757	1025.33	0.0600308	1	0.633907	0.397368	0.255899	-0.0123072	56.3205	0.981317
ENSMUSG00000046591	RIKEN cDNA 5730590G19 gene; similar to RIKEN cDNA 5730590G19-like	NM_029835	Ticrr	375	0.00946913	504	0.0114659	424	0.0126964	434.333	0.0112105	1	0.920511	0.284537	0.214513	-0.0138955	49.883	0.92239	1992	0.0384239	1162	0.0286427	1596	0.0383731	1583.33	0.0351466	1	0.813852	0.582434	0.269029	-0.010379	66.7834	0.989111
ENSMUSG00000082229	nucleosome assembly protein 1-like 2	NM_008671		86	0.00639516	51	0.00349056	103	0.00924497	80	0.00637689	1	0.56687	0.42417	0.198344	-0.013895	49.8845	0.992987	45	0.00250556	29	0.00207507	28	0.00194212	34	0.00217425	1	0.650421	0.320743	0.357205	-0.0108288	64.0096	0.873302
ENSMUSG00000049285	metallo-beta-lactamase domain containing 1	NM_177878	Mblac1	49	0.00684059	61	0.00781493	40	0.00666458	50	0.0071067	1	0.568609	0.295885	0.237552	-0.0138883	49.9089	0.942537	102	0.0107699	57	0.00769486	82	0.0107997	80.3333	0.00975482	1	0.435527	0.150687	0.0849677	-0.0229813	30.1613	0.964315
ENSMUSG00000073209	Kruppel-like factor 14	NM_001135093	Klf14	81	0.00500552	85	0.00488136	78	0.00582258	81.3333	0.00523649	1	0.720812	0.345792	0.207178	-0.0138856	49.9184	0.981476	2	7.77169e-05	0	-5.49566e-06	2	0.000105953	1.33333	5.93915e-05	1	0.553332	1.49507	0.518076	-0.00383808	180.598	0.294789
ENSMUSG00000020659	Casitas B-lineage lymphoma-like 1	NM_134048,NM_001253847,NM_001253848	Cbll1	316	0.00650826	326	0.0061134	338	0.00833388	326.667	0.00698518	1	0.620135	0.258488	0.248856	-0.0138844	49.9229	0.912413	806	0.0125758	456	0.00909681	623	0.0121189	628.333	0.0112638	1	0.712761	0.384134	0.302883	-0.0111584	62.119	0.957893
ENSMUSG00000077167	ENSMUSG00000077167		Gm24119	11	0.00820201	4	0.00266348	12	0.0108032	9	0.00722291	1	0.792687	0.315723	0.211928	-0.0138796	49.94	0.960595	18	0.0101335	9	0.00648595	7	0.00490468	11.3333	0.00717472	1	0.454032	0.480848	1.00127	-0.00356971	194.175	0.207696
ENSMUSG00000023953	polymerase (DNA directed), eta (RAD 30 related)	NM_030715	Polh	582	0.0415594	496	0.0322789	528	0.045219	535.333	0.0396858	1	0.688302	0.364827	0.204333	-0.0138765	49.9511	0.989486	976	0.0526296	611	0.0421565	721	0.048492	769.333	0.0477594	1	0.524539	0.39123	0.249231	-0.0128248	54.0472	0.963194
ENSMUSG00000041468	G-protein coupled receptor 12	NM_001010941,NM_008151	Gpr12	15	0.0011159	13	0.000897512	11	0.000988067	13	0.00100049	1	0.639172	0.660209	0.154756	-0.0138756	49.9545	0.944092	1	5.26324e-05	1	7.06211e-05	1	6.81604e-05	1	6.38046e-05	1	-0.0431135	0.691371	-0.00570747	N/A	N/A	N/A
ENSMUSG00000045246	potassium voltage-gated channel, subfamily G, member 4	NM_025734	Kcng4	4	0.000129352	4	0.000120199	7	0.000273486	5	0.000174346	1	0.871442	0.918511	0.121499	-0.0138715	49.9693	0.813722	0	-3.98675e-07	0	-1.35326e-07	0	-4.75673e-07	0	-3.36558e-07	1	0.899536	3.97127	0.177722	-0.00675848	102.56	0.176274
ENSMUSG00000090958		NM_001113379		1130	0.0543478	1510	0.0674844	1292	0.075072	1310.67	0.0656347	1	0.928504	0.330907	0.199458	-0.0138645	49.9945	0.949169	5	1.37177e-05	2	1.66277e-05	6	0.000140444	4.33333	5.69299e-05	1	0.660336	3.51364	0.692286	0.000995669	>Capzb	0.00993117
ENSMUSG00000074037	melanocortin 1 receptor	NM_008559	Mc1r	62	0.00309493	49	0.00222009	61	0.00365188	57.3333	0.00298897	1	0.699665	0.458112	0.181975	-0.0138635	49.9981	0.997887	99	0.00373063	70	0.00337593	82	0.0038544	83.6667	0.00365365	1	0.945896	0.803515	0.34112	-0.00761147	91.0661	0.906654
ENSMUSG00000078923	ubiquitin-conjugating enzyme E2 variant 1; predicted gene 7181; predicted gene 12502; similar to ubiquitin-conjugating enzyme E2 variant 1	NM_023230		14	0.000371856	16	0.000392046	10	0.000319111	13.3333	0.000361004	1	0.498325	0.153222	0.34253	-0.0138632	49.999	0.705055	25	0.000501664	10	0.000256495	12	0.000300224	15.6667	0.000352794	1	0.280228	0.721987	0.332567	-0.0100433	69.0156	0.649216
ENSMUSG00000048175	ankyrin repeat and SOCS box-containing 8	NM_001170710,NM_030121,NM_001170711	Asb8	784	0.0259874	719	0.021908	712	0.0283918	738.333	0.0254291	1	0.670601	0.427638	0.190495	-0.0138588	50.0149	0.999832	819	0.0204354	507	0.0161997	583	0.0181505	636.333	0.0182618	1	0.625368	0.533362	0.313559	-0.0101041	68.6005	0.984223
ENSMUSG00000087165				17	0.00177052	16	0.00152047	16	0.00200611	16.3333	0.0017657	1	0.351637	0.499563	0.207312	-0.0138529	50.0363	0.895542	46	0.00363122	21	0.00211922	20	0.00196702	29	0.00257249	1	0.890888	2.13125	2.00027	0.00662066	>Capzb	0.776716
ENSMUSG00000092284				8	0.00137254	5	0.000784123	10	0.00205556	7.66667	0.00140408	1	0.765397	0.500604	0.170616	-0.0138486	50.0519	0.985698	32	0.00417793	7	0.00116784	22	0.00357967	20.3333	0.00297515	1	0.328551	0.514385	0.40869	-0.00955844	72.5167	0.695857
ENSMUSG00000095665				11	0.0248268	7	0.0144924	13	0.0350596	10.3333	0.0247929	1	0.475781	0.264449	0.264619	-0.0138426	50.0733	0.885821	15	0.0255296	6	0.0130684	22	0.0467423	14.3333	0.0284468	1	0.233197	0.721358	0.181301	-0.0141897	48.8488	0.740055
ENSMUSG00000091575				0	-2.07289e-06	2	0.000230276	0	-2.68233e-06	0.666667	7.51736e-05	1	1.76497	0.314148	0.175111	-0.0138365	50.0956	0.769995	6	0.000582617	4	0.00049593	2	0.000242029	4	0.000440192	1	1.16985	0.540986	0.499312	-0.00611103	113.426	0.798059
ENSMUSG00000045036	RIKEN cDNA E130009J12 gene	NM_001008973	Tmem232	1	3.51372e-05	4	0.000130604	4	0.000168708	3	0.000111483	1	0.86671	0.304809	0.212487	-0.0138328	50.1088	0.944004	0	-1.08296e-07	0	-1.47039e-07	3	9.87039e-05	1	3.28162e-05	1	-285.137	-330.825	0.66681	N/A	N/A	N/A
ENSMUSG00000006638	abhydrolase domain containing 1		Abhd1	3	0.000110976	5	0.000168667	11	0.0004915	6.33333	0.000257047	1	1.16239	0.499194	0.154538	-0.0138227	50.1455	0.904557	5	0.000139667	6	0.000214444	6	0.000208527	5.66667	0.000187546	1	0.700685	0.479771	0.500437	-0.00729157	95.0615	0.877469
ENSMUSG00000025347	methyltransferase like 7B	NM_027853	Mettl7b	0	-1.60642e-06	1	0.000133842	0	-3.11807e-06	0.333333	4.30392e-05	1	0.441243	0.631127	0.175111	-0.0138222	50.1474	0.92187	4	0.000451508	2	0.000288247	2	0.000281346	2.66667	0.000340367	1	0.292462	0.720835	0.499312	-0.00740033	93.6643	0.492651
ENSMUSG00000089857		NM_001166645		273	0.012067	104	0.0042146	208	0.0110675	195	0.00911638	1	0.398691	0.416764	0.221176	-0.0138178	50.1633	0.928116	126	0.00416502	79	0.00336111	117	0.00484365	107.333	0.00412326	1	0.436591	0.509894	0.410038	-0.0091141	76.0521	0.811227
ENSMUSG00000064741	ENSMUSG00000064741; ENSMUSG00000075876; ENSMUSG00000075924; ENSMUSG00000064791		Snord14a	10	0.0212784	8	0.0154801	6	0.0151108	8	0.0172898	1	0.436418	0.233181	0.289133	-0.0138167	50.1675	0.83	10	0.0160127	10	0.0205225	16	0.0320335	12	0.0228562	1	0.115618	0.432642	0.124585	-0.0193083	35.8989	0.726812
ENSMUSG00000027115	kinesin family member 18A	NM_139303	Kif18a	1371	0.0145227	671	0.00648575	925	0.0117777	989	0.0109287	1	0.513069	0.397198	0.212974	-0.01381	50.1916	0.976898	1204	0.00958897	711	0.00726042	798	0.00793695	904.333	0.00826211	1	0.844838	0.593842	0.384373	-0.00799279	86.7215	0.994397
ENSMUSG00000086709				3	0.00110756	4	0.00137226	4	0.00178415	3.66667	0.00142132	1	0.871442	0.30617	0.212623	-0.013806	50.2062	0.943811	0	-3.41361e-06	0	-1.54495e-06	0	-3.10315e-06	0	-2.68724e-06	1	0.899536	1.32376	0.311013	-0.00669302	103.563	0.582329
ENSMUSG00000091474				801	0.0366669	353	0.0146729	596	0.0327569	583.333	0.0280322	1	0.493472	0.390435	0.217271	-0.0137996	50.2297	0.969081	769	0.0264832	466	0.0205727	607	0.0261059	614	0.0243873	1	0.725031	0.566073	0.500537	-0.00671095	103.286	0.939354
ENSMUSG00000087667				5	0.000837032	8	0.00124052	8	0.00161798	7	0.00123185	1	0.869466	0.0762534	0.426872	-0.0137974	50.2376	0.488313	12	0.00152109	4	0.000647432	6	0.000946615	7.33333	0.00103838	1	0.779694	0.54187	0.498944	-0.00675453	102.62	0.936503
ENSMUSG00000061374	Flt3 interacting zinc finger protein 1	NM_001110330,NM_001110329,NM_011813,NM_001110328	Fiz1	972	0.0227027	867	0.0183524	971	0.0271794	936.667	0.0227448	1	0.674362	0.344844	0.214147	-0.01379	50.2646	0.981	1977	0.0349186	1356	0.030637	1518	0.0334333	1617	0.0329963	1	0.754567	0.526389	0.334223	-0.00944258	73.4065	0.995844
ENSMUSG00000021056	testis expressed gene 21	NM_001159532,NM_019784	Tex21	4	0.000344854	1	8.02745e-05	4	0.000416578	3	0.000280569	1	0.2183	0.612341	0.213081	-0.0137891	50.2677	0.726419	3	0.000194238	0	-9.03767e-08	1	8.0406e-05	1.33333	9.15178e-05	1	-0.00123305	2.64752	-0.00280864	N/A	N/A	N/A
ENSMUSG00000061311	recombination activating gene 1	NM_009019	Rag1	31	0.000860972	25	0.000645258	33	0.00110682	29.6667	0.000871016	1	0.617122	0.39168	0.205555	-0.0137865	50.2774	0.993876	1	1.82778e-05	0	-7.26461e-07	2	5.02461e-05	1	2.25991e-05	1	11.9646	-51.4494	4.13605	N/A	N/A	N/A
ENSMUSG00000085072				39	0.0067899	27	0.00429708	27	0.00560213	31	0.00556304	1	0.31119	0.229856	0.318586	-0.0137832	50.2893	0.742936	54	0.00709025	28	0.00470566	54	0.0088525	45.3333	0.0068828	1	0.498788	0.3861	0.314217	-0.0114755	60.4023	0.911789
ENSMUSG00000030559	RAB38, member of RAS oncogene family	NM_028238	Rab38	98	0.0116234	105	0.0086769	108	0.0146723	103.667	0.0116575	1	0.806208	0.632681	0.1515	-0.0137772	50.311	0.93977	1867	0.175819	1578	0.18987	1258	0.147645	1567.67	0.171111	1	0.803907	0.597801	0.378682	-0.00814524	85.0984	0.998896
ENSMUSG00000008301	phosphorylated adaptor for RNA export	NM_019996,NM_001162989	Phax	1792	0.0806716	1307	0.0539413	1390	0.0752072	1496.33	0.06994	1	0.545594	0.45933	0.19609	-0.0137755	50.3173	0.988963	1619	0.0548088	1076	0.0466851	1227	0.0518707	1307.33	0.0511216	1	0.636191	0.463624	0.219579	-0.0127838	54.2208	0.998367
ENSMUSG00000051124	GTPase, IMAP family member 9	NM_174960	Gimap9	278	0.0249182	114	0.00928501	202	0.0217726	198	0.0186586	1	0.438041	0.525956	0.19383	-0.0137676	50.3462	0.94615	206	0.0138655	143	0.0123537	156	0.0131203	168.333	0.0131132	1	0.562815	0.498265	0.487099	-0.0076908	90.1268	0.8386
ENSMUSG00000030748	interleukin 4 receptor, alpha	NM_001008700	Il4ra	441	0.015911	410	0.0136984	383	0.0166739	411.333	0.0154278	1	0.564724	0.425553	0.202338	-0.0137641	50.3589	0.992011	150	0.00403302	93	0.00321777	96	0.00322682	113	0.00349254	1	0.687564	0.52934	0.22825	-0.0119938	57.7921	0.996832
ENSMUSG00000045435	transmembrane protein 60	NM_177601	Tmem60	419	0.0669978	256	0.0373665	304	0.058453	326.333	0.0542724	1	0.566714	0.507889	0.185121	-0.0137617	50.3679	0.98697	342	0.0410942	264	0.0406862	242	0.0363191	282.667	0.0393665	1	0.701804	0.534228	0.330293	-0.00958583	72.3096	0.994893
ENSMUSG00000034442	TRM5 tRNA methyltransferase 5 homolog (S. cerevisiae)	NM_029580	Trmt5	483	0.0530786	312	0.031149	400	0.0527376	398.333	0.0456551	1	0.518056	0.357974	0.226385	-0.013737	50.4583	0.965332	612	0.0506916	417	0.044232	480	0.0496164	503	0.04818	1	0.648366	0.499468	0.368314	-0.00923333	75.0701	0.966407
ENSMUSG00000038250	ubiquitin specific peptidase 38	NM_027554	Usp38	674	0.0263496	560	0.0199002	668	0.0313659	634	0.0258719	1	0.704747	0.385693	0.202024	-0.0137346	50.4671	0.993649	1040	0.0306855	754	0.0284734	774	0.0284813	856	0.0292134	1	0.65898	0.514178	0.330364	-0.00980584	70.6872	0.98601
ENSMUSG00000057777	mab-21-like 2 (C. elegans)	NM_011839	Mab21l2	4	0.00027163	4	0.00025241	19	0.00155882	9	0.000694286	1	0.653582	0.918511	0.133494	-0.0137303	50.483	0.839732	0	-8.37189e-07	0	-2.84175e-07	0	-2.71124e-06	0	-1.27753e-06	1	0.674652	3.97127	-117.257	N/A	N/A	N/A
ENSMUSG00000090031				7	0.00311669	5	0.00201053	11	0.00581688	7.66667	0.00364804	1	0.746247	0.626127	0.156604	-0.0137226	50.5113	0.951027	7	0.00234541	8	0.00343605	25	0.0104717	13.3333	0.00541773	1	0.668063	0.901167	0.159714	-0.0126174	54.9357	0.850336
ENSMUSG00000096795		NM_001243067		39	0.00396958	135	0.0125158	37	0.00450911	70.3333	0.00699817	1	0.536269	0.419875	0.207926	-0.0137159	50.5361	0.985455	46	0.0035273	161	0.0158121	52	0.00497864	86.3333	0.008106	1	0.355353	0.554863	0.345746	-0.0102554	67.5884	0.780931
ENSMUSG00000047473	zinc finger protein 30	NM_013705	Zfp30	266	0.00459351	238	0.00376927	252	0.00522733	252	0.00453004	1	0.643889	0.364163	0.213422	-0.0137119	50.5509	0.987177	292	0.00379702	198	0.00329719	254	0.00412246	248	0.00373889	1	0.765579	0.589366	0.346058	-0.0088399	78.4112	0.999995
ENSMUSG00000078813	leukocyte receptor cluster (LRC) member 1	NM_027203		113	0.00931033	153	0.0115977	100	0.00988611	122	0.0102647	1	0.738882	0.221535	0.264471	-0.0137096	50.5592	0.859687	170	0.0105693	111	0.00882708	126	0.00977202	135.667	0.00972281	1	0.72934	0.610813	0.539212	-0.00598751	115.766	0.935722
ENSMUSG00000027581	stathmin-like 3	NM_009133	Stmn3	8	0.00129787	3	0.000452263	37	0.00725214	16	0.00300076	1	0.979189	1.02057	0.114931	-0.0137048	50.5771	0.758303	0	-4.00015e-06	0	-5.09178e-07	0	-1.26136e-05	0	-5.70764e-06	1	-70.4973	4.41253	0.168115	N/A	N/A	N/A
ENSMUSG00000031530	dual specificity phosphatase 4	NM_176933	Dusp4	158	0.0105358	196	0.011901	174	0.0138622	176	0.0120996	1	0.714241	0.321088	0.222005	-0.0136966	50.6074	0.966347	335	0.0168979	262	0.016902	338	0.0212641	311.667	0.0183547	1	0.796303	0.533848	0.283589	-0.0103555	66.935	0.996451
ENSMUSG00000077222	ENSMUSG00000077222; ENSMUSG00000084517; ENSMUSG00000077514; ENSMUSG00000077426		Gm22270	20	0.027908	14	0.0175471	20	0.0331883	18	0.0262145	1	0.827902	0.496593	0.172076	-0.0136954	50.6116	0.978566	28	0.0294685	27	0.0363877	45	0.0591366	33.3333	0.0416643	1	0.542231	0.400099	0.199676	-0.0141086	49.1296	0.987609
ENSMUSG00000078945	NLR family, apoptosis inhibitory protein 1, related sequence 1; NLR family, apoptosis inhibitory protein 2	NM_010872,NM_001126182		47	0.000622879	27	0.000332581	35	0.000560527	36.3333	0.000505329	1	0.574912	0.612341	0.170098	-0.0136825	50.6593	0.960255	4	3.80377e-05	0	-3.74434e-07	0	-9.7492e-07	1.33333	1.22294e-05	1	-0.0299513	2.64752	0.248811	N/A	N/A	N/A
ENSMUSG00000043372	similar to hexamthylene bis-acetamide inducible 2; hexamthylene bis-acetamide inducible 2	NM_001130515,NM_001130516,NM_027658	Hexim2	187	0.00710596	157	0.00549283	158	0.00721964	167.333	0.00660614	1	0.418375	0.322424	0.253918	-0.0136796	50.6702	0.902373	110	0.00313305	88	0.00321817	115	0.00409799	104.333	0.00348307	1	0.714501	0.408271	0.303725	-0.0109434	63.3392	0.969142
ENSMUSG00000057835	zinc finger protein 119	NM_144546	Zfp119a	130	0.0145643	75	0.00766978	108	0.0145422	104.333	0.0122588	1	0.39441	0.314832	0.260935	-0.0136758	50.6843	0.882332	112	0.00943281	78	0.00842355	94	0.00988793	94.6667	0.0092481	1	0.575272	0.434032	0.339853	-0.0103796	66.7797	0.939606
ENSMUSG00000022022	mitochondrial translational release factor 1	NM_145960	Mtrf1	238	0.0235452	142	0.0128733	180	0.0213891	186.667	0.0192692	1	0.518291	0.496966	0.194182	-0.0136691	50.7091	0.979013	178	0.0132243	117	0.011151	163	0.0151375	152.667	0.0131709	1	0.889172	0.800344	0.386225	-0.0069337	99.9678	0.938254
ENSMUSG00000084880				5	0.000310273	9	0.000516206	4	0.00029501	6	0.000373829	1	0.518072	0.412016	0.213448	-0.0136642	50.7271	0.97921	10	0.0004692	5	0.000299731	10	0.000585415	8.33333	0.000451448	1	0.93669	0.28586	0.49948	-0.00848676	81.6739	0.662642
ENSMUSG00000086591				16	0.00342565	12	0.00238362	17	0.00439516	15	0.00340148	1	0.435721	0.510874	0.200217	-0.0136626	50.7332	0.94634	0	-1.05582e-05	1	0.000203435	1	0.000193431	0.666667	0.000128769	1	0.449768	0.70227	-0.0115742	N/A	N/A	N/A
ENSMUSG00000048410	zinc finger protein 407	NM_001033341	Zfp407	866	0.0141673	671	0.0099945	748	0.0146724	761.667	0.0129447	1	0.66308	0.404921	0.202615	-0.0136584	50.7488	0.997464	1351	0.0166818	849	0.0134161	1016	0.0156499	1072	0.0152493	1	0.608535	0.394242	0.245644	-0.0126568	54.7649	0.981753
ENSMUSG00000031344	gamma-aminobutyric acid (GABA) A receptor, subunit theta	NM_020488	Gabrq	3	7.94291e-05	1	2.41522e-05	6	0.00019127	3.33333	9.82837e-05	1	1.16138	0.624326	0.141857	-0.0136576	50.7516	0.868703	1	1.97253e-05	1	2.54846e-05	3	7.433e-05	1.66667	3.98466e-05	1	1.16948	-0.00288015	0.333439	N/A	N/A	N/A
ENSMUSG00000051316	TAF7 RNA polymerase II, TATA box binding protein (TBP)-associated factor	NM_175770	Taf7	1643	0.104137	913	0.053019	1245	0.0949245	1267	0.0840268	1	0.540457	0.522279	0.187798	-0.0136571	50.7535	0.979912	1253	0.0596499	763	0.0465928	919	0.0546509	978.333	0.0536312	1	0.708499	0.588238	0.256395	-0.010873	63.7493	0.991863
ENSMUSG00000079316	RAB9, member RAS oncogene family; predicted gene 9181	NM_019773		1373	0.093006	795	0.049351	927	0.0755562	1031.67	0.0726378	1	0.555108	0.530424	0.185763	-0.0136348	50.8368	0.980928	891	0.0452759	643	0.0419495	625	0.0396988	719.667	0.0423081	1	0.707213	0.51408	0.316515	-0.00996622	69.5497	0.995298
ENSMUSG00000026220	solute carrier family 16 (monocarboxylic acid transporters), member 14	NM_027921	Slc16a14	11	0.000631654	7	0.000373793	8	0.000555416	8.66667	0.000520288	1	0.47568	0.437386	0.212623	-0.0136347	50.8372	0.967149	3	0.000127968	0	-4.20833e-07	0	-9.6603e-07	1	4.21938e-05	1	-0.00746995	1.89108	0.311013	N/A	N/A	N/A
ENSMUSG00000096472		NM_009878		841	0.121437	552	0.0733465	597	0.103803	663.333	0.0995289	1	0.626368	0.439429	0.198095	-0.0136324	50.8455	0.998929	424	0.0458256	318	0.0441827	323	0.0436806	355	0.044563	1	0.67621	0.637807	0.520362	-0.00619621	111.866	0.927871
ENSMUSG00000038894	insulin receptor substrate 2	NM_001081212	Irs2	368	0.0167398	495	0.0207459	494	0.027073	452.333	0.0215196	1	0.63803	0.273733	0.250236	-0.0136222	50.8837	0.923006	397	0.0135969	293	0.012845	326	0.0139203	338.667	0.0134541	1	0.731056	0.684021	0.413705	-0.00730668	94.8649	0.987938
ENSMUSG00000003410	ELAV (embryonic lethal, abnormal vision, Drosophila)-like 3 (Hu antigen C)	NM_010487	Elavl3	3	0.000109653	1	3.39647e-05	49	0.00216343	17.6667	0.000769016	1	0.869865	3.05626	0.06944	-0.0136098	50.9298	0.417658	0	-3.37961e-07	0	-3.82391e-08	1	3.05641e-05	0.333333	1.00626e-05	1	-94.4461	-1315.36	-0.012505	N/A	N/A	N/A
ENSMUSG00000087011				4	0.00108602	8	0.00199949	5	0.00164168	5.66667	0.00157573	1	1.52557	0.386672	0.169787	-0.0136045	50.9499	0.827843	4	0.000817263	5	0.00130816	1	0.000252814	3.33333	0.000792746	1	0.874524	0.286374	1.00711	-0.00413756	167.525	0.204567
ENSMUSG00000091764		NM_001177527		71	0.0092034	40	0.00476183	73	0.0114067	61.3333	0.00845733	1	0.416517	0.355857	0.244942	-0.0136019	50.9594	0.916929	47	0.00457094	28	0.00349501	34	0.0041266	36.3333	0.00406418	1	0.57336	0.384957	0.499994	-0.00831448	83.3663	0.768036
ENSMUSG00000053181	RIKEN cDNA A830005F24 gene		A830005F24Rik	19	0.00443983	8	0.00171478	13	0.00365633	13.3333	0.00327031	1	0.548247	1.08587	0.131309	-0.0135827	51.0317	0.776623	11	0.00192637	6	0.00134993	8	0.00175202	8.33333	0.00167611	1	1.28124	0.47523	0.124585	-0.0151923	45.6249	0.880761
ENSMUSG00000036206	SH3-domain binding protein 4	NM_133816	Sh3bp4	2094	0.0720328	2481	0.0789837	1879	0.0779602	2151.33	0.0763256	1	0.930654	0.325426	0.210222	-0.0135801	51.0413	0.942604	1019	0.0262281	694	0.0229241	651	0.0209234	788	0.0233586	1	0.767558	0.59601	0.407151	-0.00776797	89.2314	0.99584
ENSMUSG00000093157				7	0.014832	5	0.00964654	9	0.022977	7	0.0158185	1	0.621334	0.500044	0.188117	-0.0135631	51.1052	0.993941	18	0.0288951	7	0.0143671	10	0.0199974	11.6667	0.0210865	1	0.519737	0.617592	0.799953	-0.00398587	173.901	0.4227
ENSMUSG00000068264	RIKEN cDNA 2310035K24 gene	NM_027129	Ap5s1	136	0.00374391	188	0.00473844	116	0.00381952	146.667	0.00410062	1	0.717044	0.294226	0.236675	-0.0135614	51.1116	0.943516	215	0.00446769	185	0.00491843	191	0.00495243	197	0.00477952	1	0.570882	0.32675	0.261308	-0.0129618	53.4763	0.943208
ENSMUSG00000069763	transmembrane protein 100	NM_026433	Tmem100	750	0.0780106	547	0.0528603	572	0.0718817	623	0.0675842	1	0.670424	0.463521	0.191809	-0.0135598	51.1178	0.999245	8	0.000386652	6	0.000541316	1	-2.73354e-05	5	0.000300211	1	0.518311	0.580919	1.28323	-0.00118403	585.412	0.033579
ENSMUSG00000037211	sprouty homolog 1 (Drosophila); similar to sprouty 1	NM_011896	Spry1	438	0.0103806	624	0.0135259	500	0.014167	520.667	0.0126911	1	0.756747	0.265148	0.246077	-0.0135589	51.1213	0.912993	951	0.0170523	698	0.0160036	941	0.0210426	863.333	0.0180328	1	0.648022	0.372617	0.202514	-0.0139619	49.6455	0.992262
ENSMUSG00000039304	tumor necrosis factor (ligand) superfamily, member 10	NM_009425	Tnfsf10	11	0.000338025	10	0.000285552	8	0.000296689	9.66667	0.000306756	1	0.39611	0.489873	0.212852	-0.0135586	51.1223	0.923937	0	-1.04182e-06	0	-3.21487e-07	1	2.83437e-05	0.333333	8.99346e-06	1	0.40888	2.11801	-0.00566846	N/A	N/A	N/A
ENSMUSG00000067430	zinc finger protein 763	NM_028543	Zfp763	542	0.0251942	263	0.0112022	465	0.0259886	423.333	0.020795	1	0.441214	0.339027	0.249529	-0.0135465	51.168	0.920813	426	0.0148765	219	0.00980839	373	0.0162726	339.333	0.0136525	1	0.588357	0.529498	0.388273	-0.00886708	78.1708	0.940143
ENSMUSG00000007476	leucine rich repeat containing 8A	NM_177725	Lrrc8a	387	0.00552088	409	0.00535823	483	0.00828938	426.333	0.00638949	1	0.792658	0.284964	0.235532	-0.0135346	51.2131	0.930533	740	0.00797938	358	0.00493601	524	0.00704219	540.667	0.00665253	1	0.521053	0.390161	0.262832	-0.0125068	55.4218	0.954771
ENSMUSG00000052026	solute carrier family 6 (neurotransmitter transporter, L-proline), member 7	NM_201353	Slc6a7	2	0.000108938	3	0.000146814	3	0.000194667	2.66667	0.00015014	1	0.858135	0.203233	0.273467	-0.0135335	51.2172	0.815761	9	0.000373599	7	0.000371381	9	0.000465675	8.33333	0.000403551	1	1.3002	1.1345	1.88739	0.00485028	>Capzb	0.910543
ENSMUSG00000033717	adrenergic receptor, alpha 2a	NM_007417	Adra2a	38	0.00183434	58	0.00260241	72	0.00419925	56	0.00287867	1	1.19259	0.548714	0.153304	-0.0135326	51.2204	0.885646	4	0.000139897	0	-2.92992e-06	2	8.33917e-05	2	7.34528e-05	1	0.558809	-66.3467	3.7817	N/A	N/A	N/A
ENSMUSG00000048458	RIKEN cDNA 6530418L21 gene	NM_001163356,NM_175398	Fam212b	173	0.00482951	236	0.00610684	213	0.00717492	207.333	0.00603709	1	1.04808	0.239262	0.239803	-0.0135321	51.2226	0.846874	76	0.00158584	45	0.00120393	60	0.00156243	60.3333	0.00145073	1	0.50257	0.44583	0.416619	-0.00921586	75.2124	0.848159
ENSMUSG00000047710	zinc finger protein 828	NM_181854	Champ1	1037	0.0307021	1273	0.0343417	1144	0.0405409	1151.33	0.0351949	1	0.796187	0.3413	0.21531	-0.0135248	51.2501	0.969523	2463	0.05521	1703	0.0488123	2069	0.057827	2078.33	0.0539498	1	0.663256	0.446389	0.258156	-0.0118103	58.6901	0.993691
ENSMUSG00000031074	fibroblast growth factor 3	NM_008007	Fgf3	6	0.000380809	10	0.000589772	5	0.000382076	7	0.000450885	1	0.435721	0.183702	0.341372	-0.0135218	51.2613	0.732689	0	-1.17369e-06	0	-6.63992e-07	2	0.000118548	0.666667	3.89034e-05	1	0.449768	0.794255	-0.00279916	N/A	N/A	N/A
ENSMUSG00000059897	cDNA sequence D10627	NM_001013379	Zfp930	432	0.0599006	228	0.0288727	316	0.0526349	325.333	0.0471361	1	0.412301	0.315364	0.264356	-0.0135173	51.2786	0.88846	401	0.041821	233	0.0311478	300	0.0390724	311.333	0.037347	1	0.60174	0.612664	0.546292	-0.00620034	111.792	0.84138
ENSMUSG00000030539	sema domain, immunoglobulin domain (Ig), transmembrane domain (TM) and short cytoplasmic domain, (semaphorin) 4B	NM_013659	Sema4b	121	0.00276546	186	0.00378026	151	0.00406119	152.667	0.00353564	1	0.810461	0.287405	0.234615	-0.013497	51.3556	0.930345	1300	0.0230458	684	0.015492	947	0.0209226	977	0.0198201	1	0.614534	0.441987	0.177104	-0.0143554	48.2847	0.998656
ENSMUSG00000047003	zinc finger protein 41	NM_011759,NM_001044718	Zfp41	1220	0.0257277	1003	0.0193115	1286	0.0325879	1169.67	0.0258757	1	0.701506	0.429233	0.199124	-0.0134942	51.3663	0.998879	1509	0.0239813	1083	0.0220383	1298	0.0257359	1296.67	0.0239185	1	0.737299	0.523269	0.331684	-0.00954662	72.6066	0.995545
ENSMUSG00000048402	GLI-Kruppel family member GLI2	NM_001081125	Gli2	906	0.0117668	1205	0.0143186	1081	0.0168429	1064	0.0143094	1	0.780866	0.321861	0.224272	-0.0134829	51.4094	0.959442	2219	0.0218253	1373	0.0172644	1700	0.0208433	1764	0.0199776	1	0.727924	0.528647	0.298962	-0.010194	67.9959	0.999464
ENSMUSG00000014773	delta-like 1 (Drosophila)	NM_007865	Dll1	178	0.00444524	195	0.00410681	161	0.0045635	178	0.00437185	1	0.770943	0.387098	0.205245	-0.0134801	51.4199	0.988019	1828	0.0353625	1193	0.0294895	1615	0.0389422	1545.33	0.0345981	1	0.80891	0.572252	0.262172	-0.0106086	65.338	0.989886
ENSMUSG00000021367	endothelin 1	NM_010104	Edn1	117	0.00916204	114	0.00824573	79	0.00745054	103.333	0.0082861	1	0.617877	0.199644	0.302696	-0.0134667	51.4712	0.805358	77	0.00452371	46	0.00346468	45	0.00330233	56	0.00376357	1	0.531084	0.422537	0.131936	-0.0165993	41.7577	0.99287
ENSMUSG00000039989	chromobox homolog 4 (Drosophila Pc class)	NM_007625	Cbx4	333	0.00920643	366	0.00916892	306	0.0100741	335	0.00948316	1	0.698138	0.342657	0.224222	-0.0134633	51.4843	0.97557	1081	0.0226913	636	0.017066	815	0.0213295	844	0.0203623	1	0.706649	0.771397	0.40687	-0.00708472	97.8369	0.951887
ENSMUSG00000085156				231	0.0185348	123	0.00870231	189	0.0180019	181	0.0150797	1	0.298419	0.454293	0.240877	-0.0134621	51.4886	0.833167	633	0.0385009	372	0.028938	541	0.0410373	515.333	0.0361587	1	0.502969	0.455519	0.411681	-0.00922204	75.162	0.855784
ENSMUSG00000085213				4	0.00157288	7	0.00254013	5	0.00237854	5.33333	0.00216385	1	0.653274	0.617028	0.170098	-0.0134555	51.5141	0.963306	2	0.000588598	3	0.00113433	0	-4.13698e-06	1.66667	0.00057293	1	0.584184	0.234509	0.248811	-0.0142894	48.5078	0.891817
ENSMUSG00000033313	F-box and leucine-rich repeat protein 8	NM_015821	Fbxl8	39	0.0018678	65	0.00285697	32	0.00182673	45.3333	0.00218383	1	1.09502	0.189979	0.269471	-0.0134541	51.5194	0.762605	92	0.00333575	63	0.00291996	73	0.00330112	76	0.00318561	1	0.711355	0.538237	0.232403	-0.0117724	58.8789	0.996243
ENSMUSG00000039756	deoxynucleotidyltransferase, terminal, interacting protein 2	NM_153806	Dnttip2	3168	0.242185	1981	0.138067	2327	0.213838	2492	0.19803	1	0.543354	0.484484	0.202511	-0.0134082	51.6957	0.985591	3036	0.174607	2210	0.162911	2054	0.147476	2433.33	0.161665	1	0.624107	0.527343	0.291702	-0.0106021	65.3782	0.988298
ENSMUSG00000051034	zinc finger protein 11	NM_172462	Zfp11	205	0.00955197	118	0.00501209	197	0.011018	173.333	0.00852735	1	0.39466	0.226571	0.320973	-0.0134043	51.7107	0.778847	231	0.00810633	135	0.00606845	217	0.00950547	194.333	0.00789342	1	0.410214	0.357691	0.464792	-0.00954272	72.6363	0.705951
ENSMUSG00000082332	ENSMUSG00000082332			12	0.00163558	0	-9.7562e-06	12	0.00196089	8	0.00119557	1	0.720964	0.212756	0.285058	-0.013401	51.7235	0.832458	14	0.00143745	4	0.000526519	15	0.00192268	11	0.00129555	1	1.5906	1.08282	0.399422	-0.00483761	143.283	0.415713
ENSMUSG00000087424				16	0.00112893	9	0.000574499	24	0.00203541	16.3333	0.00124628	1	0.598736	0.419248	0.212866	-0.0133966	51.7404	0.994057	8	0.000422467	13	0.000883591	18	0.00119083	13	0.000832297	1	0.584648	0.109814	0.499875	-0.0122671	56.5045	0.50352
ENSMUSG00000083849	ENSMUSG00000083849			9	0.00061316	5	0.000314955	13	0.00106794	9	0.00066535	1	0.773007	0.244637	0.261976	-0.0133832	51.7922	0.880881	9	0.000461422	2	0.000131174	7	0.00044723	6	0.000346609	1	0.910335	1.44481	0.571426	-0.00253407	273.531	0.265335
ENSMUSG00000061488	predicted gene 14439; predicted gene 8213; predicted gene 13981; predicted gene 8451; predicted gene 6378; predicted gene 8667; predicted gene 4923; predicted gene 5908; ribosomal protein L27a; predicted gene 14044; predicted gene 7536; predicted gene 14407		Rpl27a-ps1	1	0.000408095	3	0.00114688	3	0.00147828	2.33333	0.00101108	1	0.854656	0.203206	0.280888	-0.0133704	51.8421	0.808993	3	0.000928828	0	-1.29121e-06	3	0.00115654	2	0.000694693	1	1.95118	-220.55	1.66717	N/A	N/A	N/A
ENSMUSG00000036721	zinc finger and SCAN domain containing 12	NM_016684	Zscan12	343	0.0152724	214	0.00865899	268	0.0143273	275	0.0127529	1	0.460471	0.329399	0.257993	-0.0133584	51.8886	0.918939	400	0.0134167	280	0.0120302	290	0.0121399	323.333	0.0125289	1	0.714439	0.447809	0.447807	-0.00818509	84.6842	0.901902
ENSMUSG00000051592	cyclin B3	NM_183015	Ccnb3	6	0.000122283	4	7.57539e-05	4	9.84918e-05	4.66667	9.8843e-05	1	0.289692	0.612341	0.212623	-0.0133537	51.9068	0.80772	0	-3.76888e-07	0	-8.52871e-08	0	-1.71306e-07	0	-2.11161e-07	1	-47.373	2.64752	0.311013	N/A	N/A	N/A
ENSMUSG00000046178	neurexophilin 1	NM_008751	Nxph1	96	0.0022811	82	0.00181057	56	0.00160763	78	0.00189977	1	0.390334	0.530164	0.212623	-0.0133378	51.9685	0.912487	0	-7.03057e-06	0	-2.03843e-06	0	-2.79613e-06	0	-3.95504e-06	1	0.402917	-5.80882	0.311013	N/A	N/A	N/A
ENSMUSG00000086163				0	-7.94561e-06	0	-6.16755e-05	0	-3.59858e-05	0	-3.52023e-05	1	2.64746	0.121575	0.275175	-0.0133369	51.9722	0.476628	12	0.00223323	14	0.00332848	14	0.00324703	13.3333	0.00293625	1	1.75477	0.618756	0.784633	-0.00217128	319.234	0.147159
ENSMUSG00000011837	small nuclear RNA activating complex, polypeptide 2	NM_133968	Snapc2	512	0.0620517	660	0.0733362	431	0.0625654	534.333	0.0659844	1	0.716439	0.357199	0.222626	-0.0133356	51.9771	0.980561	754	0.0689452	593	0.0693801	626	0.0714251	657.667	0.0699168	1	0.780524	0.447896	0.266318	-0.0113435	61.105	0.989808
ENSMUSG00000041261	carbonic anhydrase 8; similar to Carbonic anhydrase-related protein (CARP) (CA-VIII)	NM_007592	Car8	21	0.00100011	16	0.000701235	19	0.00108918	18.6667	0.000930177	1	1.03595	0.461604	0.178599	-0.0133353	51.9785	0.942443	28	0.00100542	11	0.000505352	16	0.000716298	18.3333	0.000742357	1	0.960608	1.44291	0.687685	-0.00127709	542.754	0.111585
ENSMUSG00000044296	RIKEN cDNA 9630041N07 gene	NM_173387	Zfp879	36	0.000935536	28	0.000662146	29	0.00089592	31	0.000831201	1	0.335418	0.243787	0.325981	-0.0133317	51.9925	0.756235	45	0.00088134	35	0.000877828	65	0.00159016	48.3333	0.00111644	1	0.91172	0.55646	0.430135	-0.00736408	94.1254	0.963397
ENSMUSG00000095730		NM_001113468		10	0.000388512	10	0.000355112	5	0.000231767	8.33333	0.00032513	1	0.431652	0.807652	0.168168	-0.013331	51.995	0.854708	18	0.000528358	11	0.000413021	10	0.000366238	13	0.000435872	1	0.84579	1.31041	0.799515	-0.000828269	836.863	0.0857548
ENSMUSG00000044794	RIKEN cDNA 9330133O14 gene		9330133O14Rik	97	0.00886173	83	0.00675636	139	0.0152097	106.333	0.0102759	1	0.85081	0.592793	0.165744	-0.013328	52.0069	0.951114	368	0.0255685	220	0.0195405	302	0.0261511	296.667	0.0237534	1	0.737358	0.543909	0.390344	-0.00838974	82.6184	0.986417
ENSMUSG00000068154	insulinoma-associated 1	NM_016889	Insm1	1	5.92847e-05	3	0.000165269	6	0.000429135	3.33333	0.000217896	1	3.48577	0.406412	0.140945	-0.0133169	52.0503	0.539805	0	-1.82721e-07	0	-1.86068e-07	1	5.49309e-05	0.333333	1.81874e-05	1	3.59814	-441.1	2.0216	N/A	N/A	N/A
ENSMUSG00000030612	mitochondrial ribosomal protein L46	NM_023331	Mrpl46	825	0.0806578	586	0.0520967	599	0.0702798	670	0.0676781	1	0.567692	0.509265	0.198216	-0.0133164	52.0521	0.98715	946	0.0696638	746	0.0703722	677	0.0622303	789.667	0.0674221	1	0.732599	0.554072	0.314241	-0.00971819	71.3247	0.999713
ENSMUSG00000048280	RIKEN cDNA 3830402I07 gene	NM_001001187	Zfp738	421	0.0108577	191	0.00450932	324	0.0100413	312	0.00846946	1	0.487174	0.311348	0.263551	-0.0133125	52.0675	0.915932	321	0.00621803	168	0.00417466	278	0.00672977	255.667	0.00570748	1	0.755737	0.506017	0.344746	-0.0093686	73.9862	0.989447
ENSMUSG00000044548	dapper homolog 1, antagonist of beta-catenin (xenopus)	NM_021532,NM_001190466	Dact1	214	0.00644617	230	0.00642968	217	0.00789613	220.333	0.006924	1	0.883571	0.359638	0.211565	-0.0133047	52.0978	0.963138	18	0.00038882	18	0.00051486	9	0.000240928	15	0.000381536	1	0.841453	1.07619	1.27249	0.00148907	>Capzb	0.449371
ENSMUSG00000085135				6	0.0011211	7	0.0012154	3	0.000677231	5.33333	0.00100458	1	1.16192	0.174955	0.283497	-0.0132994	52.1188	0.718847	0	-3.45532e-06	0	-1.36835e-06	0	-1.1779e-06	0	-2.00053e-06	1	1.19938	0.756433	0.414684	-0.00618639	112.044	0.816592
ENSMUSG00000001053	RIKEN cDNA C330016O10 gene	NM_145974	N4bp3	616	0.0288424	683	0.0295859	552	0.0311564	617	0.0298615	1	0.851422	0.346692	0.217761	-0.0132967	52.1293	0.962515	340	0.0119256	209	0.00940152	237	0.0103829	262	0.01057	1	0.658989	0.441833	0.222826	-0.0127875	54.2049	0.99849
ENSMUSG00000091390				3	0.00161281	5	0.00247125	8	0.00520071	5.33333	0.00309492	1	1.45212	0.123895	0.318934	-0.0132932	52.1431	0.575215	1	0.000400521	3	0.00155127	0	-9.04556e-06	1.33333	0.000647581	1	1.16576	-0.000960746	0.46652	N/A	N/A	N/A
ENSMUSG00000090394		NM_001162896		69	0.00173065	64	0.00142942	54	0.00160623	62.3333	0.00158877	1	0.704528	0.497797	0.190685	-0.0132919	52.1482	0.995171	241	0.00459295	169	0.00411772	173	0.00411085	194.333	0.00427384	1	0.660081	0.584584	0.369498	-0.00868499	79.8098	0.981822
ENSMUSG00000022947	carbonyl reductase 3	NM_173047	Cbr3	187	0.0293065	147	0.0210453	98	0.018372	144	0.0229079	1	0.473475	0.430302	0.226638	-0.0132886	52.1612	0.960829	226	0.0266874	154	0.0232866	149	0.0219697	176.333	0.0239812	1	0.694316	0.819265	0.429085	-0.00658401	105.277	0.921882
ENSMUSG00000085913				53	0.00240394	29	0.00119933	55	0.00301167	45.6667	0.00220498	1	0.688726	0.299057	0.247607	-0.013287	52.1674	0.941296	75	0.00256591	34	0.00148894	29	0.00123479	46	0.00176321	1	0.780093	0.742618	0.586352	-0.0047283	146.595	0.970911
ENSMUSG00000090015				523	0.0230846	195	0.00789374	385	0.0204635	367.667	0.0171473	1	0.507464	0.381055	0.236767	-0.0132868	52.1682	0.962507	283	0.00935579	147	0.00624662	211	0.0087237	213.667	0.0081087	1	0.674936	0.45009	0.435786	-0.00843201	82.2043	0.906876
ENSMUSG00000072460	ENSMUSG00000072460		Atp5l-ps1	9	0.00530831	8	0.00435435	3	0.0021384	6.66667	0.00393369	1	0.386897	0.306676	0.282491	-0.0132856	52.1726	0.856102	1	0.000428246	3	0.00169905	0	-3.71929e-06	1.33333	0.000707861	1	1.19928	1.20279	-148.36	N/A	N/A	N/A
ENSMUSG00000049091	selenophosphate synthetase 2	NM_009266	Sephs2	375	0.0502081	441	0.0531231	385	0.0613891	400.333	0.0549068	1	0.755474	0.394279	0.21094	-0.0132802	52.1941	0.990123	1270	0.129158	932	0.121171	1037	0.131482	1079.67	0.12727	1	0.653855	0.446297	0.197325	-0.0135397	51.1936	0.999889
ENSMUSG00000035828	proviral integration site 3	NM_145478	Pim3	429	0.0323958	517	0.0353973	471	0.0425992	472.333	0.0367974	1	0.770733	0.384926	0.212554	-0.0132763	52.2094	0.986379	1107	0.0633349	836	0.0611595	848	0.0604848	930.333	0.0616597	1	0.817973	0.600302	0.369849	-0.00825431	83.974	0.99812
ENSMUSG00000090272		NM_001170853		7	0.000677071	3	0.000269641	5	0.000584292	5	0.000510335	1	0.746951	0.611433	0.170098	-0.0132717	52.2274	0.960775	0	-2.08679e-06	0	-3.03574e-07	0	-1.01625e-06	0	-1.13554e-06	1	0.771031	-218.785	0.248811	N/A	N/A	N/A
ENSMUSG00000053541	hypothetical protein LOC100044265; predicted gene 4759		Gm4759	1	5.94191e-05	3	0.000165644	3	0.000215363	2.33333	0.000146809	1	0.871442	0.204114	0.283497	-0.0132666	52.2474	0.804836	0	-1.83135e-07	0	-1.8649e-07	0	-3.74579e-07	0	-2.48068e-07	1	0.899536	0.882506	0.414684	-0.00615366	112.64	0.892779
ENSMUSG00000060336	predicted gene 4979; predicted gene 14139	NM_001142411	Zfp937	142	0.00929382	99	0.00586196	120	0.00938627	120.333	0.00818068	1	0.359757	0.366034	0.264537	-0.0132563	52.2881	0.868646	198	0.00977373	155	0.00979639	202	0.0124466	185	0.0106722	1	0.650728	0.628095	0.301455	-0.00977194	70.9324	0.981489
ENSMUSG00000029333	RasGEF domain family, member 1B; hypothetical protein LOC100044232	NM_145839,NM_181318	Rasgef1b	57	0.0012919	44	0.000862663	53	0.00142111	51.3333	0.00119189	1	0.442665	0.375018	0.248159	-0.013256	52.2895	0.930695	385	0.00669309	197	0.00437678	237	0.0051353	273	0.00540173	1	0.318965	0.303852	0.155805	-0.0173995	39.8371	0.925697
ENSMUSG00000059689	zinc finger protein 637	NM_177684	Zfp637	1200	0.0221242	972	0.0163861	972	0.0215208	1048	0.0200104	1	0.630679	0.467628	0.203672	-0.0132478	52.3218	0.99842	1222	0.0169564	946	0.0168183	984	0.0170471	1050.67	0.0169406	1	0.866276	0.612745	0.360416	-0.00826214	83.8943	0.990968
ENSMUSG00000078768	zinc finger protein 566	NM_152814		205	0.0221711	160	0.0156514	182	0.0235542	182.333	0.0204589	1	0.575957	0.371224	0.234052	-0.013242	52.3445	0.976095	386	0.0315509	263	0.0275044	307	0.0312995	318.667	0.0301183	1	0.666905	0.655401	0.589093	-0.00534414	129.702	0.866913
ENSMUSG00000095440		NM_001214911		55	0.00237221	62	0.00240809	67	0.00345401	61.3333	0.00274477	1	0.662101	0.262942	0.269009	-0.0132318	52.385	0.89957	237	0.00778595	136	0.00571037	172	0.00704257	181.667	0.0068463	1	0.631764	0.594236	0.452919	-0.00741011	93.5408	0.935682
ENSMUSG00000055900	transmembrane protein 69	NM_177670	Tmem69	211	0.0109446	139	0.00649672	237	0.0147557	195.667	0.0107323	1	0.720278	0.34332	0.230551	-0.0132309	52.3887	0.97209	410	0.0160765	256	0.0128431	321	0.0156933	329	0.014871	1	0.793313	0.521126	0.441934	-0.00762134	90.9482	0.958586
ENSMUSG00000048772	transmembrane protein 53	NM_026837	Tmem53	32	0.00109687	21	0.000656792	36	0.00148342	29.6667	0.00107903	1	0.841051	0.618037	0.165319	-0.0132302	52.3913	0.944914	58	0.00150212	25	0.000828262	41	0.00132372	41.3333	0.00121803	1	0.988584	1.87619	0.487616	-0.0025808	268.578	0.138041
ENSMUSG00000047821	F-box and WD-40 domain protein 10; tripartite motif-containing 16	NM_053169	Trim16	766	0.0118593	748	0.0106928	719	0.0134307	744.333	0.0119943	1	0.656663	0.32772	0.241559	-0.0132291	52.3956	0.961628	447	0.0051868	308	0.0045858	242	0.00350083	332.333	0.00442448	1	0.817511	0.440418	0.442133	-0.00810498	85.5212	0.900235
ENSMUSG00000038784	CCR4-NOT transcription complex, subunit 4	NM_001164411,NM_001164413,NM_016877,NM_001164414,NM_001164412	Cnot4	919	0.0135216	835	0.0112275	862	0.0152205	872	0.0133232	1	0.656899	0.34401	0.235954	-0.0132236	52.4174	0.971826	1420	0.0157686	897	0.012746	1081	0.0149731	1132.67	0.0144959	1	0.625149	0.464953	0.374192	-0.00941801	73.598	0.945298
ENSMUSG00000029923	RAB19, member RAS oncogene family	NM_011226	Rab19	3	0.00034569	2	0.000194144	4	0.000551059	3	0.000363631	1	0.278439	0.67245	0.209283	-0.0132198	52.4325	0.779295	15	0.00131917	11	0.00123662	11	0.00120562	12.3333	0.00125381	1	0.780292	0.524586	0.999183	-0.00244706	283.257	0.236886
ENSMUSG00000031202	RAB39B, member RAS oncogene family	NM_175122	Rab39b	22	0.00118718	11	0.00055179	21	0.00136736	18	0.00103544	1	0.672988	0.723428	0.161833	-0.0132195	52.4336	0.923008	3	0.000118382	0	-6.2123e-07	4	0.000200412	2.33333	0.000106058	1	1.18453	-57.2618	0.755053	N/A	N/A	N/A
ENSMUSG00000002847	phospholipase A1 member A	NM_134102	Pla1a	4	0.000374271	7	0.00060696	6	0.000678267	5.66667	0.000553166	1	2.17624	0.526307	0.141748	-0.0132079	52.4799	0.682111	0	-1.15354e-06	1	8.9395e-05	0	-1.1797e-06	0.333333	2.90206e-05	1	-140.77	-0.0173944	0.207342	N/A	N/A	N/A
ENSMUSG00000026698	phosphatidylinositol glycan anchor biosynthesis, class C	NM_001039045,NM_026078	Pigc	1048	0.026486	673	0.0156067	812	0.024702	844.333	0.0222649	1	0.585034	0.472813	0.20781	-0.0132043	52.494	0.993478	711	0.0134843	503	0.0122429	518	0.0122742	577.333	0.0126671	1	0.823997	0.580576	0.372316	-0.00830652	83.4462	0.996009
ENSMUSG00000078616	predicted gene 5598			7	0.000836745	5	0.000555384	4	0.000577669	5.33333	0.000656599	1	0.497967	0.122468	0.425245	-0.0132022	52.5024	0.585445	0	-2.57892e-06	0	-6.25277e-07	0	-1.00473e-06	0	-1.40298e-06	1	0.51402	0.529503	0.622027	-0.00608923	113.832	0.653384
ENSMUSG00000052656	ring finger protein 103	NM_009543	Rnf103	440	0.00757449	377	0.00596241	471	0.00975127	429.333	0.00776272	1	0.826467	0.363887	0.217462	-0.0131989	52.5153	0.972385	503	0.00652204	282	0.00468117	416	0.00672929	400.333	0.0059775	1	0.851209	0.679647	0.328904	-0.00854194	81.1464	0.976922
ENSMUSG00000054293	RIKEN cDNA A630033H20 gene	NM_175442,NM_001122596,NM_001122595	A630033H20Rik	82	0.00136868	35	0.000542855	62	0.00125027	59.6667	0.00105393	1	0.499485	0.524864	0.205764	-0.0131865	52.5648	0.967432	0	-4.21839e-06	0	-6.11171e-07	0	-2.17458e-06	0	-2.33471e-06	1	0.515588	2.2693	0.300981	-0.00607356	114.125	0.273184
ENSMUSG00000039967	zinc finger protein 292	NM_013889	Zfp292	3641	0.033459	1848	0.0154261	2889	0.0318969	2792.67	0.0269273	1	0.441399	0.325793	0.269461	-0.0131843	52.5736	0.901038	3804	0.0263139	2426	0.0215053	2794	0.0241254	3008	0.0239815	1	0.620314	0.505126	0.433642	-0.00823107	84.2111	0.919509
ENSMUSG00000026398	nuclear receptor subfamily 5, group A, member 2	NM_030676,NM_001159769	Nr5a2	97	0.00243277	107	0.00249369	90	0.00272707	98	0.00255118	1	0.862458	0.303309	0.236247	-0.0131833	52.5777	0.931321	0	-7.49802e-06	0	-2.80751e-06	0	-4.74317e-06	0	-5.01623e-06	1	0.890262	1.31139	0.34557	-0.00607033	114.186	0.572719
ENSMUSG00000037977	RIKEN cDNA 6430571L13 gene	NM_175486	6430571L13Rik	23	0.00137883	20	0.00109015	26	0.00186657	23	0.00144518	1	0.904263	0.623825	0.162884	-0.0131798	52.5916	0.931101	30	0.00135581	26	0.00150459	37	0.00208721	31	0.0016492	1	1.56175	0.831423	0.621367	-0.00289962	239.047	0.346019
ENSMUSG00000046679	expressed sequence C87436	NM_146170,NM_001243741,NM_001243742	C87436	476	0.00626783	352	0.00420591	442	0.00698391	423.333	0.00581922	1	0.590198	0.41433	0.22239	-0.013179	52.5948	0.990442	797	0.00792499	511	0.00650225	577	0.00715549	628.333	0.00719424	1	0.559112	0.463809	0.353117	-0.00997111	69.5155	0.933999
ENSMUSG00000028459	CD72 antigen	NM_001110320,NM_001110322,NM_001110321,NM_007654	Cd72	8	0.000133003	4	6.07115e-05	8	0.000160959	6.66667	0.000118224	1	0.322007	0.617386	0.212245	-0.013171	52.6266	0.83657	5	6.23387e-05	4	6.40607e-05	0	-2.79954e-07	3	4.20398e-05	1	2.11737	1.80379	-55.4794	N/A	N/A	N/A
ENSMUSG00000079104	mirror-image polydactyly gene 1 homolog (human); phosphoribosyl pyrophosphate synthetase 1; phosphoribosyl pyrophosphate synthetase 1-like 1	NM_001037746		1334	0.142066	754	0.0732285	1109	0.141865	1065.67	0.119053	1	0.577006	0.441152	0.217169	-0.0131666	52.6444	0.991647	1425	0.114253	841	0.0863886	1110	0.11109	1125.33	0.103911	1	0.642978	0.466435	0.320288	-0.0103509	66.965	0.976861
ENSMUSG00000039219	AT rich interactive domain 4B (RBP1-like)	NM_198122,NM_194262	Arid4b	2663	0.0146744	1665	0.0083331	2237	0.0148004	2188.33	0.0126026	1	0.626359	0.358667	0.236094	-0.0131629	52.659	0.976349	3333	0.0138421	2244	0.0119351	2478	0.0128415	2685	0.0128729	1	0.734552	0.504884	0.334064	-0.0096207	72.0475	0.991475
ENSMUSG00000086536				7	0.00254455	11	0.00362153	14	0.00607858	10.6667	0.00408155	1	1.75903	0.345023	0.185963	-0.0131625	52.6609	0.764844	35	0.00971013	22	0.00779945	40	0.0138305	32.3333	0.0104467	1	0.366495	0.294691	0.0997317	-0.0201088	34.4699	0.977957
ENSMUSG00000015202	Cnksr family member 3	NM_172546	Cnksr3	233	0.00710151	254	0.00699564	217	0.00788608	234.667	0.00732774	1	0.808788	0.29098	0.246058	-0.0131587	52.6761	0.925716	551	0.0127144	446	0.0131621	487	0.0140151	494.667	0.0132972	1	0.830133	0.498067	0.250063	-0.0113085	61.2942	0.989916
ENSMUSG00000030521	M-phase phosphoprotein 10 (U3 small nucleolar ribonucleoprotein)	NM_026483	Mphosph10	2081	0.073919	1168	0.0377294	1486	0.0634118	1578.33	0.0583534	1	0.519608	0.544916	0.201098	-0.0131504	52.7091	0.969896	2041	0.0545499	1456	0.0498785	1424	0.0475189	1640.33	0.0506491	1	0.574475	0.498185	0.303679	-0.0106587	65.031	0.970222
ENSMUSG00000036478	B-cell translocation gene 1, anti-proliferative; similar to myocardial vascular inhibition factor	NM_007569	Btg1	1715	0.0623485	1740	0.0569932	1737	0.0755792	1730.67	0.0649736	1	0.887662	0.488218	0.185866	-0.0131493	52.7135	0.972629	4955	0.136617	3438	0.121202	3434	0.11803	3942.33	0.125283	1	0.634931	0.439427	0.152541	-0.01527	45.3928	0.99748
ENSMUSG00000047648	F-box protein 30	NM_001168297,NM_027968	Fbxo30	1221	0.0296194	763	0.0169625	1113	0.032463	1032.33	0.0263483	1	0.594316	0.318056	0.254589	-0.0131489	52.7151	0.945869	1074	0.0195887	640	0.0149626	924	0.0210441	879.333	0.0185318	1	0.652635	0.524538	0.369616	-0.00904503	76.6329	0.973079
ENSMUSG00000051879	keratin 71	NM_019956	Krt71	0	-4.06957e-06	0	-1.50423e-05	0	-1.31651e-05	0	-1.0759e-05	1	1.17665	0.269491	0.233482	-0.0131403	52.7498	0.845054	18	0.00114381	10	0.000811798	15	0.0011879	14.3333	0.00104784	1	0.779899	1.37158	0.665749	-0.00197467	351.019	0.22527
ENSMUSG00000024691	RIKEN cDNA 4632417K18 gene	NM_026640	Fam111a	6047	0.0986727	3305	0.0497642	4106	0.080773	4486	0.0764033	1	0.491469	0.478157	0.218216	-0.013135	52.7709	0.968664	2138	0.0260113	1363	0.0213758	1474	0.0224696	1658.33	0.0232856	1	0.594685	0.43214	0.334781	-0.0104363	66.4171	0.94797
ENSMUSG00000030209	glutamate receptor, ionotropic, NMDA2B (epsilon 2)	NM_008171	Grin2b	6	6.67354e-05	5	5.1724e-05	10	0.000134498	7	8.43193e-05	1	0.579902	0.73372	0.169193	-0.0131286	52.7967	0.917764	2	1.6573e-05	0	-5.82332e-08	0	-2.33932e-07	0.666667	5.42693e-06	1	1.17693	-262.542	-133.648	N/A	N/A	N/A
ENSMUSG00000085395				5	0.00163244	4	0.00121354	5	0.00197224	4.66667	0.00160608	1	0.521919	0.765426	0.170098	-0.0131276	52.8006	0.89677	0	-5.03133e-06	0	-1.36626e-06	0	-3.43031e-06	0	-3.27597e-06	1	-56.6677	3.3094	0.248811	N/A	N/A	N/A
ENSMUSG00000030768	dispatched homolog 1 (Drosophila)	NM_026866	Disp1	886	0.0166296	1238	0.0211508	900	0.0200955	1008	0.0192919	1	0.784119	0.340142	0.230601	-0.0131242	52.8145	0.964753	2734	0.0389418	1841	0.0335193	2454	0.0435831	2343	0.0386814	1	0.817701	0.612267	0.310474	-0.00930325	74.5059	0.991835
ENSMUSG00000031931	ankyrin repeat domain 49	NM_019683	Ankrd49	1234	0.128818	647	0.0606685	900	0.112585	927	0.100691	1	0.523465	0.435289	0.225938	-0.0131123	52.8624	0.977766	1751	0.137876	1248	0.125832	1244	0.12223	1414.33	0.128646	1	0.685887	0.533162	0.397473	-0.00845304	81.9998	0.972297
ENSMUSG00000027568	similar to neurotensin receptor type 1; neurotensin receptor 1	NM_018766	Ntsr1	13	0.000366027	20	0.000521443	15	0.000507007	16	0.000464826	1	0.870505	0.337369	0.226131	-0.0131086	52.8773	0.952402	11	0.0002328	6	0.000162418	15	0.00039666	10.6667	0.00026396	1	0.850562	1.20222	0.86667	-0.000580809	1193.42	0.0791104
ENSMUSG00000039725	RIKEN cDNA 2810408M09 gene	NM_001007581	2810408M09Rik	366	0.0245864	406	0.0249317	321	0.0257641	364.333	0.0250941	1	0.712667	0.31408	0.246455	-0.0131068	52.8847	0.950025	671	0.03406	446	0.0289576	593	0.0375514	570	0.033523	1	0.692044	0.416681	0.218756	-0.013013	53.2658	0.996513
ENSMUSG00000044461	shisa homolog 2 (Xenopus laevis)	NM_145463	Shisa2	261	0.015221	236	0.012739	221	0.0155517	239.333	0.0145039	1	0.787142	0.471493	0.196274	-0.0131048	52.8927	0.991466	133	0.00580614	65	0.00363996	67	0.00364753	88.3333	0.00436454	1	0.924456	0.6052	0.553444	-0.00547511	126.6	0.931302
ENSMUSG00000029019	natriuretic peptide precursor type B	NM_008726	Nppb	9	0.00212069	2	0.000413068	9	0.00254479	6.66667	0.00169285	1	0.484041	0.648317	0.189105	-0.0131018	52.9046	0.930135	3	0.00052665	6	0.00136182	8	0.00176752	5.66667	0.00121866	1	0.388585	0.119398	0.499874	-0.0126499	54.7948	0.513374
ENSMUSG00000057842	zinc finger protein 595	NM_177622	Zfp595	144	0.00212143	70	0.000929104	145	0.00256554	119.667	0.00187202	1	0.525306	0.349461	0.252901	-0.0130882	52.9599	0.949496	258	0.00287159	128	0.00182311	180	0.00249799	188.667	0.00239756	1	0.512304	0.574715	0.538453	-0.00675051	102.681	0.757248
ENSMUSG00000091604				2	0.00121659	1	0.00049527	6	0.00442491	3	0.00204559	1	1.30876	0.697966	0.142473	-0.0130865	52.9665	0.80944	9	0.00417228	7	0.00414879	6	0.00346186	7.33333	0.00392764	1	0.779381	0.309015	0.166345	-0.0155123	44.6838	0.976247
ENSMUSG00000030888	ribosomal RNA processing 8, methyltransferase, homolog (yeast)	NM_133951,NM_025897	Rrp8	1213	0.031378	1051	0.0247754	1052	0.0326609	1105.33	0.0296048	1	0.643435	0.401431	0.224492	-0.0130826	52.9824	0.992499	1668	0.0325394	1256	0.0313665	1253	0.0304963	1392.33	0.0314674	1	0.603677	0.361446	0.262088	-0.0125338	55.3021	0.96292
ENSMUSG00000021532	FAST kinase domains 3	NM_027123	Fastkd3	568	0.0440516	343	0.0239855	425	0.0394383	445.333	0.0358251	1	0.451473	0.505601	0.218594	-0.0130816	52.9864	0.9486	973	0.0569935	610	0.0457278	700	0.0511522	761	0.0512912	1	0.683425	0.653525	0.529556	-0.00599087	115.701	0.929268
ENSMUSG00000026832	cytohesin 1 interacting protein	NM_139200	Cytip	41	0.000696117	21	0.000331319	19	0.000389741	27	0.000472392	1	0.446348	0.758136	0.179051	-0.0130806	52.9904	0.877315	0	-2.1455e-06	0	-3.73014e-07	0	-6.77873e-07	0	-1.06546e-06	1	0.460738	3.27788	0.261906	-0.00596764	116.151	0.176897
ENSMUSG00000033883	ENSMUSG00000033883	NM_001101478	D3Ertd254e	918	0.0258624	484	0.0124829	749	0.0253937	717	0.0212463	1	0.493165	0.346805	0.258608	-0.0130709	53.0298	0.935874	681	0.014407	423	0.0114814	513	0.013556	539	0.0131481	1	0.480836	0.567152	0.326871	-0.0100623	68.8856	0.907729
ENSMUSG00000065669	ENSMUSG00000064495; ENSMUSG00000065669; ENSMUSG00000065686; ENSMUSG00000065750; ENSMUSG00000065799		Gm22581	6	0.00813672	4	0.00493071	10	0.0162793	6.66667	0.00978224	1	0.285598	0.465665	0.255843	-0.0130707	53.0307	0.804641	5	0.00509614	5	0.0065368	10	0.0127362	6.66667	0.00812306	1	1.64439	1.00979	0.499594	-0.0035857	193.309	0.333314
ENSMUSG00000025962	FAST kinase domains 2	NM_172422	Fastkd2	1303	0.0218838	618	0.00935131	1013	0.0204259	978	0.0172204	1	0.512472	0.514189	0.210391	-0.0130698	53.0342	0.972685	1561	0.0197529	1080	0.0175078	1112	0.0175606	1251	0.0182738	1	0.718587	0.520338	0.450211	-0.00766536	90.4259	0.94686
ENSMUSG00000086153				0	-5.19421e-06	0	-2.46848e-05	0	-2.30445e-05	0	-1.76412e-05	1	2.77352	0.141837	0.262667	-0.0130691	53.0373	0.48599	7	0.00145991	5	0.00133218	8	0.00207933	6.66667	0.00162381	1	1.83833	0.721882	0.748967	-0.00190344	364.155	0.122176
ENSMUSG00000030047	Rho GTPase activating protein 25	NM_001037727,NM_175476	Arhgap25	96	0.00149723	132	0.00190526	101	0.0018972	109.667	0.00176656	1	0.89872	0.307613	0.236634	-0.0130628	53.0627	0.927158	100	0.00117398	47	0.000705513	69	0.00101018	72	0.000963225	1	0.583573	0.488946	0.260233	-0.0116735	59.3779	0.985196
ENSMUSG00000094733		NM_001082542		0	-3.38121e-06	0	-1.12481e-05	0	-6.56294e-06	0	-7.06409e-06	1	0.882485	0.141837	0.350223	-0.0130602	53.0734	0.65378	2	0.000950339	1	0.000607035	1	0.000592181	1.33333	0.000716518	1	0.584924	0.721882	0.998623	-0.00189456	365.862	0.172268
ENSMUSG00000021708	RAS protein-specific guanine nucleotide-releasing factor 2	NM_009027	Rasgrf2	5	7.10471e-05	4	5.28159e-05	4	6.86689e-05	4.33333	6.41773e-05	1	0.348577	0.612341	0.212623	-0.01306	53.0742	0.860027	0	-2.18974e-07	0	-5.94626e-08	0	-1.19435e-07	0	-1.32624e-07	1	0.359814	2.64752	0.311013	-0.00594699	116.554	0.199127
ENSMUSG00000074345	tumor necrosis factor, alpha-induced protein 8-like 3	NM_001033535	Tnfaip8l3	20	0.0016508	5	0.000383497	17	0.00169526	14	0.00124319	1	0.435721	1.10221	0.150087	-0.0130512	53.1096	0.749292	0	-5.08791e-06	0	-4.31759e-07	0	-2.94855e-06	0	-2.82274e-06	1	0.449768	4.76553	0.219539	-0.00593827	116.725	0.123986
ENSMUSG00000085124				0	-6.21715e-06	0	-5.0357e-05	0	-1.04935e-05	0	-2.23559e-05	1	1.45802	0.136772	0.315201	-0.0130476	53.1245	0.592216	23	0.00174742	28	0.00271765	10	0.000946839	20.3333	0.00180397	1	0.966396	0.696101	0.898761	-0.00188199	368.305	0.465539
ENSMUSG00000043753	doublesex and mab-3 related transcription factor like family A1	NM_175647	Dmrta1	4	0.000157027	4	0.000145916	5	0.000237142	4.33333	0.000180028	1	1.52502	0.459256	0.170098	-0.0130473	53.1257	0.820471	0	-4.83972e-07	0	-1.64279e-07	0	-4.12459e-07	0	-3.5357e-07	1	1.57419	1.98564	0.248811	-0.00593434	116.803	0.254874
ENSMUSG00000050105	glycine/arginine rich protein 1	NM_001099296	Grrp1	128	0.0128698	94	0.0087492	93	0.0112735	105	0.0109641	1	0.54426	0.392103	0.23826	-0.013045	53.135	0.973422	24	0.00177971	21	0.00202387	28	0.00262568	24.3333	0.00214309	1	0.884414	0.50989	0.141125	-0.0147657	46.943	0.957639
ENSMUSG00000036469	membrane-associated ring finger (C3HC4) 1	NM_175188,NM_001166372,NM_001166375	2001-03-01	38	0.000199126	31	0.000150774	39	0.000246869	36	0.000198923	1	0.756583	0.276268	0.261438	-0.0130444	53.1377	0.910418	1	3.33546e-06	2	9.92042e-06	1	4.49226e-06	1.33333	5.91605e-06	1	2.62648	2.54939	4.33978	0.0138233	>Capzb	0.911339
ENSMUSG00000065280	ENSMUSG00000065280		Gm24453	63	0.15342	25	0.0535611	41	0.119887	43	0.108956	1	0.718985	0.69608	0.166854	-0.0130429	53.1436	0.932903	108	0.19864	75	0.176583	51	0.11697	78	0.164064	1	0.5194	0.470764	0.234956	-0.0126275	54.892	0.973884
ENSMUSG00000020364	zinc finger protein 354A	NM_009329	Zfp354a	343	0.00572887	175	0.00268264	246	0.00494233	254.667	0.00445128	1	0.532271	0.406402	0.235632	-0.0130371	53.1673	0.974081	253	0.00317306	130	0.00209144	181	0.00283618	188	0.00270023	1	0.778077	0.636975	0.43061	-0.00717967	96.543	0.997916
ENSMUSG00000049657	zinc finger and BTB domain containing 5; predicted gene 6766	NM_001163283,NM_001163284,NM_173399	Zbtb5	581	0.00770478	623	0.00753168	665	0.0105813	623	0.00860592	1	0.776502	0.319474	0.241877	-0.0130356	53.1735	0.95003	1273	0.0127731	802	0.0102909	980	0.0122589	1018.33	0.0117743	1	0.734127	0.606033	0.366864	-0.00844725	82.0559	0.997594
ENSMUSG00000050890	PDLIM1 interacting kinase 1 like	NM_001163794,NM_146156	Pdik1l	920	0.0104394	471	0.00482669	703	0.00956651	698	0.00827754	1	0.495278	0.3784	0.248786	-0.0130332	53.1833	0.951677	1065	0.00910309	764	0.00836651	853	0.00910185	894	0.00885715	1	0.758797	0.638088	0.497805	-0.00629329	110.141	0.978984
ENSMUSG00000058447	zinc finger protein 82	NM_177889,NM_001252519,NM_001253385	Gm26920	214	0.0186683	153	0.0121712	186	0.0194606	184.333	0.0167667	1	0.494863	0.341158	0.26235	-0.0130263	53.2112	0.931789	279	0.0183481	176	0.014819	232	0.0190399	229	0.0174023	1	0.696615	0.589815	0.292541	-0.010054	68.9424	0.994911
ENSMUSG00000027208	fibroblast growth factor 7	NM_008008	Fgf7	405	0.0128045	287	0.00843034	266	0.0101592	319.333	0.0104647	1	0.572341	0.352042	0.249369	-0.013018	53.2454	0.961796	15	0.000317953	4	0.000112269	7	0.000190197	8.66667	0.000206806	1	0.452687	1.8286	1.05752	0.00101311	>Capzb	0.0194857
ENSMUSG00000020420	zinc finger proten 607	NM_001024726	Zfp607	154	0.0136724	66	0.00520972	127	0.0134935	115.667	0.0107919	1	0.314032	0.480893	0.248411	-0.013005	53.2984	0.837437	270	0.0181074	164	0.0140775	208	0.0174013	214	0.0165288	1	0.611584	0.633248	0.581229	-0.00567608	122.117	0.817396
ENSMUSG00000028036	prostaglandin F receptor	NM_008966	Ptgfr	730	0.0222679	399	0.011308	568	0.0209318	565.667	0.0181692	1	0.599249	0.511116	0.205141	-0.013001	53.3149	0.991518	7	9.22843e-05	4	0.000104738	5	0.000106836	5.33333	0.000101286	1	0.997008	0.743426	0.43332	-0.00625569	110.803	0.939476
ENSMUSG00000021385	inositol 1,3,4,5,6-pentakisphosphate 2-kinase	NM_199056	Ippk	527	0.0349018	335	0.0202106	428	0.0341042	430	0.0297389	1	0.585496	0.394208	0.235018	-0.0129991	53.3228	0.982647	536	0.0267163	390	0.0249106	340	0.0211456	422	0.0242575	1	0.760148	0.480139	0.446736	-0.00788056	87.9566	0.929491
ENSMUSG00000045546	ring finger protein 113A2		Rnf113a2	402	0.053319	339	0.0413493	320	0.0510779	353.667	0.048582	1	0.569474	0.35892	0.24806	-0.0129979	53.3276	0.964558	260	0.0258682	213	0.0271983	209	0.0259902	227.333	0.0263522	1	0.625654	0.526953	0.257662	-0.0113884	60.8644	0.992655
ENSMUSG00000061079	zinc finger protein 143	NM_009281	Zfp143	967	0.0299824	573	0.0161463	727	0.0270785	755.667	0.0244024	1	0.534847	0.488443	0.216026	-0.0129972	53.3303	0.981439	1026	0.0239489	739	0.0221034	718	0.02092	827.667	0.0223241	1	0.670892	0.493928	0.357543	-0.00940299	73.7157	0.974568
ENSMUSG00000070284	GDP-mannose pyrophosphorylase B	NM_177910	Gmppb	342	0.00915847	344	0.00846136	306	0.00985416	330.667	0.009158	1	0.681961	0.387022	0.228875	-0.0129836	53.3865	0.988828	332	0.00668915	253	0.00652996	257	0.00646319	280.667	0.00656077	1	0.687034	0.414748	0.271835	-0.01166	59.4467	0.983704
ENSMUSG00000049164	zinc finger protein 518	NM_028319	Zfp518a	1264	0.033833	658	0.0159999	1059	0.0340499	993.667	0.027961	1	0.516894	0.42199	0.235192	-0.012976	53.4176	0.971788	1378	0.0277728	865	0.022337	1062	0.0267155	1101.67	0.0256084	1	0.696742	0.559797	0.445	-0.00755622	91.732	0.961137
ENSMUSG00000064672	ENSMUSG00000064961; ENSMUSG00000065336; ENSMUSG00000065939; ENSMUSG00000065647; ENSMUSG00000064788; ENSMUSG00000065852; ENSMUSG00000064658; ENSMUSG00000064960; ENSMUSG00000064597; ENSMUSG00000064672		Gm22806	12	0.0162297	12	0.0147679	6	0.0096544	10	0.0135507	1	0.435496	0.31235	0.28572	-0.0129675	53.4528	0.879295	22	0.0224833	16	0.0209189	14	0.0178536	17.3333	0.0204186	1	0.318757	0.360156	0.499393	-0.00946542	73.2295	0.59788
ENSMUSG00000012640	zinc finger protein 715	NM_027264	Zfp715	1279	0.0150658	629	0.00680403	954	0.013524	954	0.0117979	1	0.458508	0.370472	0.259106	-0.0129648	53.4639	0.929448	795	0.00702236	439	0.00497893	613	0.00676916	615.667	0.00625682	1	0.590843	0.570662	0.44497	-0.00775733	89.3539	0.911862
ENSMUSG00000069184	zinc finger protein 72	NM_001081680	Zfp72	148	0.0166566	75	0.00769745	141	0.0190952	121.333	0.0144831	1	0.423089	0.382386	0.260247	-0.012964	53.467	0.913795	147	0.0124493	83	0.00900819	109	0.0115185	113	0.010992	1	0.493636	0.311817	0.36643	-0.0111943	61.9195	0.826874
ENSMUSG00000063281	zinc finger protein 35	NM_011755	Zfp35	1218	0.0733811	642	0.0350548	846	0.0611586	902	0.0565315	1	0.449199	0.406611	0.248643	-0.0129635	53.469	0.937707	1276	0.0578694	917	0.0532968	944	0.0534568	1045.67	0.0548743	1	0.832978	0.598219	0.610884	-0.00505038	137.247	0.89225
ENSMUSG00000066122	olfactory receptor 45	NM_146963	Olfr45	0	-1.90316e-06	0	-1.89935e-05	0	-1.29291e-05	0	-1.12752e-05	1	2.64746	0.165477	0.250159	-0.0129633	53.4699	0.520324	4	0.00053491	6	0.00102503	7	0.00116661	5.66667	0.00090885	1	1.75477	0.842196	0.713302	-0.00179769	385.576	0.13282
ENSMUSG00000038451	splA/ryanodine receptor domain and SOCS box containing 2	NM_013539	Spsb2	89	0.00301902	98	0.00306704	66	0.0026928	84.3333	0.00292629	1	0.655168	0.313599	0.257889	-0.0129572	53.4951	0.944318	56	0.00142464	45	0.00146858	47	0.00149515	49.3333	0.00146279	1	0.773562	0.913349	0.659554	-0.00333776	207.668	0.851254
ENSMUSG00000096910		NM_001142957		290	0.0324824	133	0.0135596	205	0.0275722	209.333	0.0245381	1	0.449551	0.355006	0.266356	-0.0129562	53.4991	0.916458	274	0.0230864	159	0.0171734	205	0.0215713	212.667	0.0206104	1	0.611173	0.67572	0.482472	-0.00665342	104.179	0.902284
ENSMUSG00000013707	tumor necrosis factor, alpha-induced protein 8-like 2	NM_027206	Tnfaip8l2	84	0.013761	67	0.0101968	58	0.0114731	69.6667	0.0118103	1	0.435622	0.46604	0.234497	-0.0129511	53.5203	0.938782	1	8.10451e-05	1	0.000146237	4	0.000595478	2	0.000274254	1	3.32877	3.73459	1.27863	0.00765243	>Capzb	0.341299
ENSMUSG00000094132		NM_001242945		2	0.000263301	3	0.000360928	5	0.000796037	3.33333	0.000473422	1	0.873785	0.624326	0.170392	-0.0129456	53.5432	0.939381	2	0.000198142	3	0.000380839	1	0.000122588	2	0.000233856	1	-0.00369407	-0.00288015	-0.00281499	N/A	N/A	N/A
ENSMUSG00000032578	cytokine inducible SH2-containing protein	NM_009895	Cish	48	0.000790355	69	0.00103973	55	0.00108593	57.3333	0.000972006	1	0.925999	0.325124	0.232912	-0.0129402	53.5652	0.933186	139	0.00173582	82	0.00130884	97	0.00150984	106	0.00151817	1	0.60547	0.395253	0.484053	-0.00834993	83.0124	0.803592
ENSMUSG00000044708	potassium inwardly-rectifying channel, subfamily J, member 10; similar to ATP-sensitive inward rectifier potassium channel 10 (Potassium channel, inwardly rectifying subfamily J member 10) (Inward rectifier K(+) channel Kir4.1)	NM_001039484	Kcnj10	2	6.74399e-05	2	6.24852e-05	5	0.000203656	3	0.000111194	1	0.433897	0.924664	0.167025	-0.0129366	53.5804	0.809786	5	0.000127704	1	3.26112e-05	4	0.000127173	3.33333	9.58295e-05	1	0.467969	1.43826	1.75179	0.00350806	>Capzb	0.227359
ENSMUSG00000052253	zinc finger protein 622	NM_144523	Zfp622	706	0.0461033	598	0.0355876	595	0.0465656	633	0.0427522	1	0.650579	0.412999	0.226056	-0.0129308	53.6044	0.994426	1200	0.0591812	740	0.0466944	867	0.0533343	935.667	0.05307	1	0.598393	0.493481	0.271741	-0.0113296	61.18	0.986157
ENSMUSG00000032405	protein inhibitor of activated STAT 1	NM_019663	Pias1	1279	0.0609055	693	0.0300066	938	0.0536258	970	0.0481793	1	0.536624	0.443253	0.22915	-0.0129257	53.6255	0.980571	1506	0.054027	887	0.0407584	1026	0.0459368	1139.67	0.0469074	1	0.700392	0.673652	0.45381	-0.00683572	101.401	0.973592
ENSMUSG00000030137	tubulin, alpha 8	NM_017379	Tuba8	16	0.0013222	15	0.00114762	9	0.000897844	13.3333	0.00112256	1	0.272076	0.409254	0.283768	-0.0128998	53.733	0.771013	1	5.82099e-05	3	0.000237415	1	7.60606e-05	1.66667	0.000123895	1	1.23208	0.716183	-0.00852211	N/A	N/A	N/A
ENSMUSG00000046062	protein phosphatase 1, regulatory (inhibitor) subunit 15b	NM_133819	Ppp1r15b	1417	0.0278812	1264	0.0226872	1431	0.0337598	1370.67	0.0281094	1	0.744512	0.344422	0.240524	-0.0128993	53.7353	0.966559	2679	0.03984	1535	0.0291993	2095	0.038852	2103	0.0359637	1	0.685832	0.487278	0.323619	-0.010044	69.0111	0.98695
ENSMUSG00000067389	ENSMUSG00000067389		Gm17080	8	0.00181141	5	0.00104165	6	0.0016205	6.33333	0.00149119	1	0.325562	0.369482	0.285586	-0.012899	53.7366	0.822948	5	0.000849008	3	0.000653871	10	0.00212724	6	0.00121004	1	0.70431	0.961374	0.399429	-0.00650825	106.503	0.828185
ENSMUSG00000065226	ENSMUSG00000065226; ENSMUSG00000064753		Gm25791	112	0.150386	42	0.0500079	61	0.0974361	71.6667	0.0992768	1	0.333626	0.335273	0.297976	-0.0128989	53.7368	0.813584	199	0.201862	110	0.142817	142	0.179754	150.333	0.174811	1	0.352735	0.235775	0.112217	-0.0201287	34.4358	0.962266
ENSMUSG00000050592	family with sequence similarity 78, member A; hypothetical protein LOC100047386	NM_175511	Fam78a	111	0.00247629	139	0.00287901	109	0.00293673	119.667	0.00276401	1	0.871484	0.295384	0.249748	-0.012898	53.7408	0.916489	4	5.96212e-05	7	0.000147112	6	0.000120613	5.66667	0.000109115	1	0.214743	0.288057	0.331504	-0.0134031	51.7153	0.661265
ENSMUSG00000091133				10	0.000634277	6	0.000335339	4	0.000296468	6.66667	0.000422028	1	0.521348	0.527503	0.212566	-0.0128961	53.7486	0.972785	23	0.00110423	18	0.00110556	18	0.00107837	19.6667	0.00109605	1	0.508574	1.16265	0.610419	-0.00372885	185.888	0.363205
ENSMUSG00000047990	family with sequence similarity 148, member A	NM_001163143	C2cd4a	8	0.00108733	4	0.000505194	3	0.000492623	5	0.000695048	1	0.217861	0.459256	0.283497	-0.0128927	53.7627	0.695539	0	-3.35124e-06	0	-5.68771e-07	0	-8.56815e-07	0	-1.59227e-06	1	0.224884	1.98564	0.414684	-0.00577975	119.927	0.181849
ENSMUSG00000071567	RIKEN cDNA A830039N20 gene		A830039N20Rik	17	0.00230096	15	0.00187231	14	0.00227149	15.3333	0.00214825	1	0.508967	0.410066	0.242735	-0.0128911	53.7695	0.964848	17	0.00173155	8	0.00104312	17	0.00216281	14	0.00164583	1	1.24158	1.17185	0.764407	-0.000858845	807.069	0.0967142
ENSMUSG00000022009	nuclear fragile X mental retardation protein interacting protein 1	NM_013745	Nufip1	663	0.0305585	582	0.0243878	553	0.0305325	599.333	0.0284929	1	0.664549	0.43703	0.220235	-0.0128832	53.8025	0.998544	1052	0.0366018	782	0.03482	816	0.0354197	883.333	0.0356138	1	0.72848	0.484457	0.214006	-0.0125925	55.0446	0.998132
ENSMUSG00000031631	RIKEN cDNA 4933411K20 gene	NM_025747	4933411K20Rik	1262	0.0158998	732	0.00845156	1023	0.0155042	1005.67	0.0132852	1	0.555508	0.460806	0.224307	-0.0128831	53.8026	0.986421	1025	0.00970393	608	0.00738102	771	0.0091156	801.333	0.00873352	1	0.689936	0.513388	0.345882	-0.00944639	73.3769	0.986626
ENSMUSG00000034958	ataxia, cerebellar, Cayman type homolog (human)	NM_178662	Atcay	5	0.000112389	2	4.17746e-05	12	0.000325881	6.33333	0.000160015	1	1.04573	3.36787	0.0708742	-0.0128796	53.8177	0.369615	0	-3.46393e-07	0	-4.70317e-08	0	-5.66802e-07	0	-3.20075e-07	1	1.07944	14.5613	0.103671	-0.00576657	120.201	0.0510275
ENSMUSG00000037447	AT rich interactive domain 5A (MRF1-like)	NM_001172206,NM_145996,NM_001172205	Arid5a	113	0.000721722	131	0.000774223	111	0.000853852	118.333	0.000783266	1	0.631939	0.361156	0.245902	-0.0128685	53.8639	0.97326	52	0.000248366	37	0.000226913	56	0.000334834	48.3333	0.000270037	1	0.652412	0.679489	0.231258	-0.0112013	61.8812	0.957867
ENSMUSG00000094942		NM_001162910		78	0.00851603	49	0.00484613	55	0.00717502	60.6667	0.00684573	1	0.41013	0.499121	0.233172	-0.0128651	53.8782	0.920816	114	0.00939018	74	0.00780316	95	0.00976681	94.3333	0.00898672	1	0.822052	0.47683	0.431104	-0.00800439	86.5958	0.935193
ENSMUSG00000091021				14	0.00167737	8	0.0008601	10	0.00143486	10.6667	0.00132411	1	0.311188	0.472637	0.256959	-0.0128596	53.901	0.828866	22	0.00198959	16	0.00185234	15	0.00169247	17.6667	0.0018448	1	0.212416	0.630911	0.332814	-0.0109065	63.5538	0.588132
ENSMUSG00000022052	protein phosphatase 2 (formerly 2A), regulatory subunit B (PR 52), alpha isoform	NM_001205188,NM_028032	Ppp2r2a	2008	0.0911166	1928	0.0796127	1687	0.0916855	1874.33	0.0874716	1	0.742283	0.422596	0.218756	-0.012857	53.9121	0.994808	3262	0.111752	2508	0.109951	2539	0.108515	2769.67	0.110073	1	0.730433	0.55909	0.300466	-0.00997888	69.4614	0.999713
ENSMUSG00000049489	predicted gene 9731; RIKEN cDNA 1810009O10 gene	NM_197989	Fam58b	365	0.0545866	257	0.0347229	242	0.0432193	288	0.0441763	1	0.523416	0.481791	0.223684	-0.0128539	53.925	0.977396	544	0.0613869	424	0.0612513	436	0.0614077	468	0.0613487	1	0.651889	0.456951	0.219751	-0.0127862	54.2107	0.999165
ENSMUSG00000071561	cDNA sequence BC100530; stefin A3	NM_001082546	BC100530	6	0.000726478	4	0.000447328	10	0.00146049	6.66667	0.0008781	1	0.430161	4.01398	0.0815481	-0.0128417	53.9762	0.349181	8	0.000730332	2	0.000233461	6	0.00068218	5.33333	0.000548658	1	1.31874	2.49461	2.17132	0.00826393	>Capzb	0.852907
ENSMUSG00000030965	family with sequence similarity 175, member B	NM_198017	Fam175b	2026	0.0270948	1167	0.0143525	1533	0.0246868	1575.33	0.0220447	1	0.515578	0.43918	0.235712	-0.0128393	53.9865	0.972295	1218	0.0122114	726	0.00934603	878	0.0110023	940.667	0.0108533	1	0.757412	0.670047	0.393729	-0.00763021	90.8425	0.994611
ENSMUSG00000090327				6	0.00267369	5	0.00202036	6	0.00320534	5.66667	0.00263313	1	0.141456	0.252136	0.429909	-0.0128382	53.991	0.484013	15	0.00506289	8	0.00345286	10	0.00420766	11	0.00424114	1	0.46846	0.0895769	0.299154	-0.0165251	41.9451	0.657284
ENSMUSG00000047759	heparan sulfate (glucosamine) 3-O-sulfotransferase 3A1	NM_178870	Hs3st3a1	79	0.00367784	68	0.00292498	78	0.00437787	75	0.00366023	1	0.738735	0.352906	0.240381	-0.0128382	53.9911	0.970829	32	0.00111255	24	0.00107353	29	0.00126171	28.3333	0.00114926	1	0.693901	0.508223	0.240382	-0.0117797	58.8426	0.999548
ENSMUSG00000087055				3	0.000992082	2	0.000525304	6	0.00241286	3.66667	0.00131008	1	0.579087	1.09883	0.144993	-0.0128287	54.0309	0.770615	36	0.00926663	18	0.00592042	18	0.00577194	24	0.00698633	1	0.422385	0.280286	0.0553657	-0.0237792	29.1493	0.995563
ENSMUSG00000032724	ankyrin repeat and BTB (POZ) domain containing 2	NM_178890	Abtb2	330	0.00743502	471	0.00979851	410	0.0111234	403.667	0.0094523	1	0.91288	0.371266	0.222751	-0.0128248	54.0474	0.957912	362	0.00614146	227	0.00492716	297	0.00628354	295.333	0.00578405	1	0.787938	0.764528	0.27219	-0.00949262	73.0195	0.934647
ENSMUSG00000082515	ENSMUSG00000082515			6	0.00341586	5	0.00261502	5	0.00341727	5.33333	0.00314938	1	0.289278	0.123272	0.515625	-0.01282	54.0677	0.48845	9	0.00386628	4	0.00219822	6	0.00321502	6.33333	0.00309317	1	0.390196	0.360712	-0.00139435	N/A	N/A	N/A
ENSMUSG00000054519	zinc finger protein 867	NM_178417	Zfp867	453	0.0243027	228	0.0111005	346	0.0222502	342.333	0.0192178	1	0.428865	0.443988	0.246669	-0.0128085	54.1161	0.929684	601	0.0243095	319	0.0165219	457	0.0230689	459	0.0213001	1	0.666387	0.57151	0.48751	-0.00698192	99.2775	0.926962
ENSMUSG00000030145	zinc finger protein 248	NM_028335	Zfp248	436	0.00988296	330	0.00690118	321	0.00875235	362.333	0.00851217	1	0.556819	0.364075	0.255233	-0.0128073	54.1211	0.960228	276	0.00469214	152	0.00331482	226	0.00480406	218	0.00427034	1	0.691638	0.562795	0.313541	-0.00977409	70.9168	0.996687
ENSMUSG00000046058	EP300 interacting inhibitor of differentiation 2	NM_198425	Eid2	461	0.0657579	477	0.0627802	420	0.0721315	452.667	0.0668899	1	0.69298	0.44221	0.219592	-0.0127978	54.1613	0.999032	313	0.033504	220	0.0301953	256	0.0342314	263	0.0326436	1	0.740177	0.423091	0.13977	-0.0157019	44.144	0.990929
ENSMUSG00000008843	claudin 13	NM_020504	Cldn13	2	0.000344575	8	0.00128077	5	0.00103896	5	0.000888103	1	1.30716	0.535458	0.170392	-0.0127937	54.1788	0.860844	0	-1.06201e-06	0	-1.44195e-06	1	0.000159997	0.333333	5.24977e-05	1	1.3493	-80.7206	-0.00281499	N/A	N/A	N/A
ENSMUSG00000020325	follistatin-like 3	NM_031380	Fstl3	14	0.000618502	25	0.00101442	17	0.000900707	18.6667	0.000844543	1	0.488078	0.417564	0.246883	-0.0127925	54.1838	0.956406	28	0.00093531	22	0.000939589	25	0.00104129	25	0.000972062	1	1.54798	1.77186	1.43965	0.0048232	>Capzb	0.675453
ENSMUSG00000032567	asteroid homolog 1 (Drosophila)	NM_001164828,NM_025651	Aste1	297	0.0053609	178	0.00290158	239	0.00517916	238	0.00448055	1	0.608971	0.437131	0.228505	-0.012787	54.2071	0.99368	407	0.00554006	294	0.00512442	276	0.00468695	325.667	0.00511714	1	0.643889	0.529497	0.43438	-0.00801147	86.5194	0.937922
ENSMUSG00000045326	fibronectin type III domain containing 7	NM_001165965,NM_177091	Fndc7	3	3.51097e-05	9	9.48546e-05	6	8.49691e-05	6	7.16445e-05	1	2.04493	0.638205	0.14014	-0.0127671	54.2916	0.673359	21	0.000188642	23	0.000263986	12	0.000134268	18.6667	0.000195632	1	0.946346	0.564065	0.666262	-0.0044835	154.6	0.7663
ENSMUSG00000025340	similar to Ras negative regulator Rabex-5/Rin2; RAB guanine nucleotide exchange factor (GEF) 1	NM_019983,NM_001199059	Rabgef1	400	0.00724416	331	0.00543552	364	0.00789038	365	0.00685669	1	0.7233	0.389383	0.233015	-0.012757	54.3346	0.986984	803	0.0109961	508	0.0088988	618	0.0105544	643	0.0101498	1	0.747359	0.54916	0.332867	-0.00934919	74.1398	0.998748
ENSMUSG00000025577	chromobox homolog 2 (Drosophila Pc class)	NM_007623	Cbx2	605	0.0240143	785	0.027992	653	0.0306724	681	0.0275596	1	0.758607	0.308845	0.258701	-0.0127531	54.3515	0.935775	3008	0.0911175	1886	0.0730116	2545	0.0961005	2479.67	0.0867432	1	0.67	0.544708	0.336255	-0.00948418	73.0846	0.989956
ENSMUSG00000045822	zinc finger, SWIM domain containing 3	NM_178375	Zswim3	69	0.00464888	98	0.00606967	80	0.00646834	82.3333	0.00572896	1	0.919522	0.226185	0.288308	-0.0127486	54.3705	0.816241	164	0.00836584	87	0.00567239	121	0.00769418	124	0.00724414	1	0.862967	0.779729	0.544889	-0.00487888	142.071	0.99469
ENSMUSG00000055200	SERTA domain containing 3	NM_133210	Sertad3	174	0.024081	157	0.0199889	177	0.0294535	169.333	0.0245078	1	0.620767	0.507657	0.212328	-0.0127479	54.3733	0.994542	186	0.0193802	105	0.0140074	157	0.0204136	149.333	0.0179337	1	0.471063	0.788379	0.267041	-0.0103329	67.0816	0.852699
ENSMUSG00000045201	leucine rich repeat containing 3B	NM_146052	Lrrc3b	25	0.00149065	23	0.00126016	19	0.00136565	22.3333	0.00137215	1	0.697179	0.429938	0.22415	-0.0127471	54.3767	0.997425	13	0.000580354	15	0.000860818	8	0.000446232	12	0.000629135	1	0.447804	0.575396	0.374735	-0.0092618	74.8393	0.846904
ENSMUSG00000064030	within bgcn homolog (Drosophila)	NM_030100,NM_001253704,NM_001170869	Wibg	1052	0.0825052	894	0.0639944	872	0.0820489	939.333	0.0761829	1	0.569405	0.483179	0.222502	-0.0127447	54.387	0.988793	1271	0.075108	976	0.0738577	1030	0.0759683	1092.33	0.074978	1	0.651866	0.556932	0.325768	-0.00965844	71.7659	0.988493
ENSMUSG00000087586				3	0.000714181	0	-2.13099e-05	5	0.00144074	2.66667	0.000711205	1	0.872986	0.170205	0.337156	-0.01274	54.4073	0.707465	4	0.00071797	5	0.00115005	1	0.000221871	3.33333	0.000696629	1	0.290594	0.866259	6.0539	0.00901562	>Capzb	0.320686
ENSMUSG00000051469	zinc finger protein 191	NM_021559	Zfp191	1684	0.0386331	978	0.0204126	1403	0.0386719	1355	0.0325725	1	0.56399	0.414354	0.241042	-0.0127396	54.4091	0.980457	2049	0.0354204	1229	0.0272092	1427	0.0307785	1568.33	0.0311361	1	0.703224	0.551086	0.36533	-0.00884385	78.3762	0.990132
ENSMUSG00000000903	pre-B lymphocyte gene 3	NM_009514	Vpreb3	2	0.000271103	5	0.000621794	5	0.000818209	4	0.000570369	1	1.73334	0.118295	0.340767	-0.0127386	54.413	0.509634	2	0.000204013	4	0.000522688	2	0.000253868	2.66667	0.000326856	1	3.51657	1.98716	0.499321	-0.000233538	2968.03	0.000406601
ENSMUSG00000028345	testis expressed gene 10	NM_172304	Tex10	2355	0.0395428	1383	0.0210902	1803	0.0363438	1847	0.0323256	1	0.582831	0.505906	0.21644	-0.0127372	54.4191	0.989753	2865	0.036249	1861	0.0301575	2007	0.0316894	2244.33	0.0326986	1	0.683396	0.513816	0.358836	-0.00922544	75.1344	0.981586
ENSMUSG00000064853	ENSMUSG00000064567; ENSMUSG00000064853; ENSMUSG00000065653		Gm23442	3	0.00412769	5	0.00628683	3	0.00497159	3.66667	0.0051287	1	0.867458	0.246399	0.281088	-0.0127304	54.4483	0.852475	3	0.00310621	5	0.00663366	2	0.00258265	3.33333	0.00410751	1	1.56251	0.866049	2.00258	0.00466096	>Capzb	0.584808
ENSMUSG00000069208	zinc finger protein 825	NM_146231	Zfp825	147	0.0328625	222	0.0454336	120	0.0322708	163	0.0368556	1	0.698711	0.69308	0.177072	-0.0127246	54.4728	0.938724	118	0.0198208	196	0.0422225	90	0.0188803	134.667	0.0269745	1	0.713763	0.815005	0.555675	-0.00491526	141.02	0.911794
ENSMUSG00000091568				8	0.00049744	8	0.00045044	13	0.000972743	9.66667	0.000640208	1	0.75736	0.54818	0.195136	-0.0127245	54.4734	0.984367	10	0.000468623	12	0.000720242	11	0.000642829	11	0.000610564	1	1.52321	0.600325	1.00051	-0.000948744	730.594	0.0388868
ENSMUSG00000087354				32	0.00160629	19	0.000877269	14	0.000841847	21.6667	0.00110847	1	0.353255	0.226627	0.36726	-0.0127241	54.475	0.713325	24	0.000904739	12	0.000580077	17	0.000801568	17.6667	0.000762128	1	0.488106	0.721445	0.293271	-0.00996327	69.5703	0.882597
ENSMUSG00000035208	similar to schlafen 8; schlafen 8	NM_001167743,NM_181545	Slfn8	48	0.000629282	30	0.000363753	40	0.000632321	39.3333	0.000541785	1	0.52597	0.327104	0.276867	-0.0127212	54.4877	0.923813	19	0.000185971	9	0.000113301	14	0.000171456	14	0.00015691	1	0.678677	1.20238	0.356345	-0.00658165	105.315	0.655526
ENSMUSG00000022900	immunoglobulin-like domain containing receptor 1	NM_134109	Ildr1	0	-1.97078e-06	0	-6.27105e-06	0	-4.82319e-06	0	-4.35501e-06	1	1.03596	0.212756	0.28984	-0.01272	54.4927	0.778105	46	0.000553916	22	0.000338434	29	0.000435201	32.3333	0.000442517	1	0.68665	1.08282	0.826447	-0.00155439	445.929	0.24819
ENSMUSG00000048490	nuclear receptor interacting protein 1	NM_173440	Nrip1	610	0.00571771	695	0.00585934	637	0.00711993	647.333	0.00623233	1	0.881486	0.278395	0.263872	-0.0127186	54.4986	0.892386	2155	0.01535	1493	0.0135947	1652	0.0146691	1766.67	0.0145379	1	0.781013	0.440593	0.303389	-0.0105673	65.5937	0.979123
ENSMUSG00000026708	centromere protein L	NM_027429,NM_001159930	Cenpl	1073	0.0173356	553	0.00812582	744	0.0144391	790	0.0133002	1	0.530706	0.462713	0.232858	-0.012705	54.557	0.978103	1022	0.0124214	684	0.0106568	714	0.0108362	806.667	0.0113048	1	0.678196	0.485233	0.387533	-0.00893077	77.6134	0.958736
ENSMUSG00000028807	zinc finger and BTB domain containing 8a	NM_028603	Zbtb8a	273	0.0215871	226	0.0164501	243	0.0231157	247.333	0.0203843	1	0.695371	0.344198	0.252837	-0.0126928	54.6097	0.963529	195	0.0115756	133	0.0101255	174	0.0129062	167.333	0.0115358	1	0.635443	0.486665	0.332762	-0.00999222	69.3687	0.975236
ENSMUSG00000027654	family with sequence similarity 83, member D	NM_027975	Fam83d	576	0.0188301	666	0.019927	535	0.0209419	592.333	0.0198997	1	0.72898	0.356594	0.24555	-0.0126912	54.6165	0.970976	946	0.0233504	673	0.0212519	825	0.0254047	814.667	0.0233357	1	0.748143	0.645855	0.20071	-0.0120446	57.5484	0.960638
ENSMUSG00000030203	dual specificity phosphatase 16	NM_001048054,NM_130447	Dusp16	716	0.0129353	640	0.0103608	661	0.0142834	672.333	0.0125265	1	0.764584	0.382904	0.234162	-0.012691	54.6172	0.981592	2271	0.0311436	1463	0.0256516	1412	0.0241378	1715.33	0.0269777	1	0.772145	0.48352	0.270802	-0.0110117	62.9463	0.995773
ENSMUSG00000059013	SH2 domain containing 3C	NM_001252547,NM_013781	Sh2d3c	397	0.008311	550	0.0106955	384	0.00970937	443.667	0.00957194	1	0.96148	0.346335	0.232608	-0.0126882	54.6292	0.935415	30	0.00044776	16	0.000310485	22	0.000415735	22.6667	0.000391326	1	0.479154	0.973013	0.364069	-0.00766999	90.3713	0.711373
ENSMUSG00000078599	selection and upkeep of intraepithelial T cells 8	NM_001100466		0	-6.66801e-07	0	-6.21102e-06	0	-2.32968e-06	0	-3.06916e-06	1	4.94192	0.111444	0.272396	-0.0126869	54.635	0.335815	10	0.000187414	14	0.000335194	9	0.000210209	11	0.000244272	1	3.27557	0.567193	0.776707	-0.00152125	455.644	0.0243916
ENSMUSG00000089431				0	-9.28238e-06	0	-6.17586e-05	0	-3.60343e-05	0	-3.56917e-05	1	0.882485	0.0709186	0.525334	-0.0126863	54.6377	0.409255	2	0.00260895	2	0.00333297	2	0.00325141	2	0.00306444	1	0.584924	0.360941	1.49793	-0.00152064	455.825	0.0293446
ENSMUSG00000020773	tripartite motif-containing 47	NM_001205081,NM_172570	Trim47	115	0.00249693	175	0.00352499	131	0.00343322	140.333	0.00315171	1	0.803134	0.375112	0.2339	-0.0126853	54.6417	0.974688	14	0.00022145	18	0.000372403	19	0.000381588	17	0.000325147	1	0.749365	0.0637807	0.261557	-0.0177104	39.1378	0.626853
ENSMUSG00000046556	zinc finger protein 319	NM_024467	Zfp319	362	0.016076	508	0.0206138	473	0.0251641	447.667	0.020618	1	0.771863	0.264579	0.28159	-0.0126784	54.6715	0.882892	907	0.0305093	616	0.0264905	828	0.0347228	783.667	0.0305742	1	0.598141	0.424767	0.256699	-0.0121679	56.9654	0.983088
ENSMUSG00000033006	SRY-box containing gene 10	NM_011437	Sox10	547	0.0369728	686	0.0428321	730	0.059473	654.333	0.046426	1	0.789923	0.355441	0.241754	-0.0126729	54.6951	0.966222	422	0.0214258	285	0.0185355	374	0.023687	360.333	0.0212161	1	0.608777	0.554696	0.309545	-0.0101041	68.6005	0.980093
ENSMUSG00000021697	DEP domain containing 1B	NM_178683	Depdc1b	481	0.0112256	443	0.00948695	404	0.0113403	442.667	0.0106843	1	0.617103	0.404396	0.241198	-0.0126698	54.7084	0.986584	481	0.00844764	350	0.00787419	335	0.00734256	388.667	0.00788813	1	0.581044	0.404497	0.205293	-0.013788	50.2719	0.992309
ENSMUSG00000064390	U73B small nuclear RNA; U73A small nuclear RNA		Rnu73b	5	0.0130359	3	0.00669939	5	0.0155342	4.33333	0.0117565	1	0.874237	0.663943	0.172769	-0.0126615	54.7447	0.926964	10	0.0197131	13	0.0327977	11	0.027052	11.3333	0.0265209	1	0.232606	0.221509	0.0906231	-0.0223447	31.0206	0.928434
ENSMUSG00000067424	zinc finger protein 563	NM_001024950	Zfp563	215	0.0127053	113	0.00614516	176	0.0124847	168	0.0104451	1	0.449177	0.348694	0.281635	-0.0126604	54.7494	0.902628	180	0.00799477	70	0.00398438	177	0.00982363	142.333	0.00726759	1	0.513674	0.968453	0.355321	-0.00772891	89.6823	0.744986
ENSMUSG00000021638	occludin	NM_008756	Ocln	14	0.000196368	23	0.000220843	11	0.000148179	16	0.000188464	1	0.871077	0.15832	0.354371	-0.0126571	54.7637	0.673977	577	0.006856	413	0.00626941	374	0.00553843	454.667	0.00622128	1	0.952908	0.826764	0.571413	-0.00423378	163.718	0.963219
ENSMUSG00000057315	Rho GTPase activating protein 24	NM_146161,NM_029270	Arhgap24	597	0.00474036	489	0.00357634	498	0.00476092	528	0.00435921	1	0.72003	0.529873	0.203359	-0.0126505	54.792	0.992276	397	0.00236517	269	0.00205593	302	0.0022478	322.667	0.00222297	1	0.873021	0.796788	0.510017	-0.00521171	132.998	0.980829
ENSMUSG00000037007	zinc finger protein 113	NM_019747	Zfp113	381	0.00793117	244	0.00458491	368	0.00915188	331	0.00722266	1	0.40061	0.274923	0.326978	-0.0126488	54.7994	0.805549	812	0.0127868	434	0.00874236	718	0.0141017	654.667	0.0118769	1	0.491424	0.445333	0.351743	-0.0103297	67.1022	0.895978
ENSMUSG00000034883	peptidylprolyl isomerase (cyclophilin) like 5	NM_001081406	Lrr1	474	0.0579503	273	0.0302038	384	0.0564161	377	0.0481901	1	0.544118	0.439649	0.239602	-0.0126464	54.8097	0.979144	449	0.041294	407	0.0479913	351	0.0403059	402.333	0.0431971	1	0.861083	0.637627	0.538181	-0.00559969	123.783	0.973574
ENSMUSG00000045871	SLIT and NTRK-like family, member 6	NM_175499	Slitrk6	2308	0.0997876	1163	0.0464311	1773	0.0924583	1748	0.079559	1	0.486328	0.503417	0.230406	-0.0126432	54.8239	0.960476	786	0.0253251	436	0.018112	532	0.0214606	584.667	0.0216326	1	0.866122	0.649606	0.487294	-0.006162	112.487	0.991822
ENSMUSG00000088323				3	0.00406752	3	0.00376838	3	0.00489173	3	0.00424254	1	1.46364	0.194808	0.281504	-0.0126365	54.8528	0.681629	11	0.0113382	2	0.00263223	5	0.00642139	6	0.00679728	1	0.211263	4.69845	1.1994	0.00359858	>Capzb	0.0505273
ENSMUSG00000073176	zinc finger protein 449	NM_030139	Zfp449	851	0.0417779	452	0.020445	692	0.0409428	665	0.0343885	1	0.560817	0.432902	0.240151	-0.012633	54.8679	0.982401	386	0.0141689	228	0.0107658	295	0.0135465	303	0.0128271	1	0.560509	0.386269	0.304423	-0.01149	60.3261	0.939988
ENSMUSG00000050295	forkhead box C1	NM_008592	Foxc1	21	0.000965342	19	0.000804737	28	0.00154694	22.6667	0.00110567	1	0.829122	0.454327	0.212789	-0.0126271	54.8935	0.987333	5	0.000170342	9	0.000397638	19	0.000818093	11	0.000462024	1	1.41338	0.558269	0.526301	-0.00537678	128.915	0.626955
ENSMUSG00000046008	pancreatic lipase	NM_026925	Pnlip	2	0.000249302	3	0.000347492	3	0.000451794	2.66667	0.00034953	1	1.30716	0.204114	0.283497	-0.012623	54.9113	0.719448	0	-7.68371e-07	0	-3.91223e-07	0	-7.85802e-07	0	-6.48465e-07	1	1.3493	0.882506	0.414684	-0.00551007	125.797	0.651924
ENSMUSG00000047423	expressed sequence AI837181	NM_001256515,NM_134149	AI837181	580	0.0349004	589	0.0325774	520	0.0375948	563	0.0350242	1	0.659221	0.414073	0.236644	-0.012611	54.9638	0.992632	660	0.0299122	425	0.0246586	516	0.0291839	533.667	0.0279182	1	0.51698	0.466835	0.299873	-0.0111125	62.3753	0.946386
ENSMUSG00000031077	Fas (TNFRSF6)-associated via death domain	NM_010175	Fadd	207	0.00969338	213	0.00912343	178	0.00999714	199.333	0.00960465	1	0.862879	0.394814	0.226772	-0.0126054	54.9881	0.972797	341	0.012057	222	0.0100422	241	0.0106285	268	0.0109092	1	0.592761	0.300974	0.10737	-0.01881	36.8498	0.998869
ENSMUSG00000045107	RIKEN cDNA 1810063B07 gene	NM_026209	Saysd1	227	0.0181328	180	0.0132089	165	0.0158053	190.667	0.0157157	1	0.539741	0.494789	0.228	-0.0125993	55.0148	0.980127	185	0.0111049	127	0.00977297	184	0.0138063	165.333	0.0115614	1	0.829739	0.668493	0.292996	-0.00936902	73.9829	0.973591
ENSMUSG00000088615				7	0.0118562	3	0.00467558	2	0.00405214	4	0.0068613	1	0.247036	0.20676	0.429284	-0.0125923	55.0452	0.581414	8	0.0102059	2	0.00326591	3	0.00477966	4.33333	0.00608382	1	0.586102	-0.00144086	0.332442	N/A	N/A	N/A
ENSMUSG00000034855	chemokine (C-X-C motif) ligand 10; similar to Small inducible cytokine B10 precursor (CXCL10) (Interferon-gamma-induced protein CRG-2) (Gamma-IP10) (IP-10) (C7)	NM_021274	Cxcl10	9	0.000781066	4	0.000322769	6	0.000628572	6.33333	0.000577469	1	0.483371	1.37368	0.140945	-0.0125865	55.0705	0.670062	2	0.000128471	0	-3.63389e-07	1	8.04597e-05	1	6.95224e-05	1	1.18241	-990.489	2.0216	N/A	N/A	N/A
ENSMUSG00000086451				27	0.000858601	19	0.000561448	38	0.00145994	28	0.000959996	1	0.935994	0.483427	0.201432	-0.0125858	55.0736	0.965726	0	-2.64629e-06	0	-6.32104e-07	0	-2.53926e-06	0	-1.93922e-06	1	0.966168	2.09014	0.294644	-0.00547285	126.652	0.277777
ENSMUSG00000046574	proline rich 12	NM_175022	Prr12	727	0.0192112	1099	0.02647	935	0.0295192	920.333	0.0250668	1	0.801699	0.31781	0.258718	-0.0125741	55.125	0.936518	3069	0.0617557	1731	0.0445106	2420	0.0606941	2406.67	0.0556535	1	0.684462	0.642576	0.339172	-0.00887089	78.1373	0.985982
ENSMUSG00000028718	Scl/Tal1 interrupting locus	NM_009185	Stil	1001	0.0123994	694	0.00784426	851	0.0126668	848.667	0.0109702	1	0.76043	0.436409	0.223764	-0.0125728	55.1307	0.99454	1178	0.0109929	764	0.00913079	844	0.00982757	928.667	0.00998375	1	0.964898	0.60348	0.338424	-0.00853911	81.1732	0.963572
ENSMUSG00000090946		NM_001162903		434	0.0191331	387	0.0157231	442	0.0234837	421	0.0194466	1	0.688077	0.389039	0.242999	-0.0125727	55.1312	0.985212	313	0.0103598	205	0.00869966	226	0.00933437	248	0.00946459	1	0.676297	0.494103	0.335738	-0.00978865	70.8114	0.983557
ENSMUSG00000038876	ring finger protein 146	NM_001110197,NM_026518,NM_001110198,NM_001110196	Rnf146	1369	0.0227173	863	0.0130721	1049	0.0209305	1093.67	0.0189066	1	0.58981	0.466033	0.230853	-0.0125696	55.1447	0.991815	1263	0.015763	904	0.0144627	879	0.0136962	1015.33	0.0146406	1	0.806704	0.610257	0.422855	-0.00737373	94.0023	0.996828
ENSMUSG00000037369	4lysine (K)-specific demethylase 6A	NM_009483	Kdm6a	1493	0.0155629	1211	0.0113244	1368	0.017024	1357.33	0.0146371	1	0.719976	0.443793	0.225168	-0.0125666	55.1579	0.997977	3146	0.0248053	2526	0.0254801	2769	0.0272319	2813.67	0.0258391	1	0.853982	0.544012	0.318801	-0.00944153	73.4147	0.989651
ENSMUSG00000021895	Rho guanine nucleotide exchange factor (GEF) 3	NM_027871	Arhgef3	382	0.0195415	329	0.0153703	319	0.0196345	343.333	0.0181821	1	0.564139	0.469554	0.232696	-0.0125658	55.1612	0.986544	509	0.0196322	355	0.0175284	284	0.013659	382.667	0.0169399	1	0.673685	0.429519	0.38691	-0.00933877	74.2226	0.930272
ENSMUSG00000019997	connective tissue growth factor	NM_010217	Ctgf	250	0.00875137	305	0.0098037	177	0.0073993	244	0.00865146	1	1.06125	0.370493	0.223951	-0.0125583	55.1945	0.923273	385	0.0101713	253	0.00855042	321	0.0105839	319.667	0.00976854	1	0.447993	0.255061	0.105504	-0.0198913	34.8468	0.987923
ENSMUSG00000030017	regenerating islet-derived 3 gamma	NM_011260	Reg3g	4	0.000257344	3	0.000179351	6	0.000466368	4.33333	0.000301021	1	0.871442	1.02057	0.141748	-0.0125582	55.1946	0.776975	0	-7.93157e-07	0	-2.01922e-07	0	-8.1115e-07	0	-6.02076e-07	1	0.899536	4.41253	0.207342	-0.00544527	127.293	0.11948
ENSMUSG00000047719	UbiA prenyltransferase domain containing 1	NM_027873	Ubiad1	294	0.0150789	300	0.0141136	301	0.0185677	298.333	0.0159201	1	0.790984	0.346902	0.249402	-0.0125503	55.2297	0.958962	445	0.0172231	264	0.0130725	298	0.0143802	335.667	0.0148919	1	0.593521	0.56215	0.459315	-0.0075964	91.2468	0.901924
ENSMUSG00000072762	RIKEN cDNA 4930522L14 gene		4930522L14Rik	171	0.0120392	120	0.00756241	125	0.0105303	138.667	0.010044	1	0.547615	0.426817	0.246809	-0.0125421	55.2655	0.976344	322	0.0171337	260	0.0177035	212	0.0140704	264.667	0.0163025	1	0.726959	0.521342	0.33913	-0.0094398	73.4282	0.993432
ENSMUSG00000056854	POU domain, class 3, transcription factor 4	NM_008901	Pou3f4	6	0.000930941	5	0.000716315	7	0.00131071	6	0.000985987	1	0.436306	0.493115	0.243165	-0.0125389	55.2798	0.932323	3	0.000348374	2	0.000298336	2	0.000289543	2.33333	0.000312084	1	-0.00370931	0.356155	0.500447	N/A	N/A	N/A
ENSMUSG00000033439	coiled-coil domain containing 76	NM_030016	Trmt13	241	0.00435593	195	0.00321516	210	0.00455334	215.333	0.00404148	1	0.657068	0.30971	0.277096	-0.0125361	55.2919	0.928971	334	0.00455283	223	0.00389113	262	0.00445601	273	0.00429999	1	0.619774	0.390814	0.339113	-0.0106082	65.341	0.932411
ENSMUSG00000054951	RIKEN cDNA 9130008F23 gene	NM_027834	9130008F23Rik	29	0.00243748	21	0.00152492	22	0.00218308	24	0.00204849	1	0.842796	0.375536	0.236537	-0.012534	55.3013	0.968172	129	0.00826193	89	0.00728677	88	0.00702647	102	0.00752506	1	0.480278	0.30791	0.295023	-0.0126541	54.7764	0.886068
ENSMUSG00000034762	GLIS family zinc finger 1	NM_147221	Glis1	53	0.00123486	59	0.00127564	49	0.00137936	53.6667	0.00129662	1	0.772957	0.602966	0.190909	-0.0125288	55.3243	0.96812	18	0.000312527	7	0.00015572	5	0.000107109	10	0.000191785	1	0.384979	0.808576	0.606346	-0.00536627	129.167	0.45105
ENSMUSG00000000216	similar to epithelial sodium channel gamma subunit; sodium channel, nonvoltage-gated 1 gamma	NM_011326	Scnn1g	0	-5.782e-06	0	-1.86852e-05	0	-1.09022e-05	0	-1.17898e-05	1	1.26069	0.158524	0.329621	-0.0125258	55.3374	0.633925	35	0.00162512	17	0.0010084	17	0.00098372	23	0.00120574	1	0.835606	0.806809	0.939881	-0.00136023	509.582	0.425508
ENSMUSG00000032193	low density lipoprotein receptor	NM_001252659,NM_010700	Ldlr	1124	0.04541	1559	0.0575934	957	0.0461504	1213.33	0.0497179	1	0.953797	0.335794	0.243148	-0.0125177	55.3733	0.92758	2649	0.0810222	1801	0.0704282	2027	0.0773173	2159	0.0762559	1	0.857841	0.543484	0.332525	-0.00916985	75.5898	0.988571
ENSMUSG00000074922	family with sequence similarity 122, member A	NM_026520	Fam122a	179	0.0382759	210	0.0408768	165	0.0422558	184.667	0.0404695	1	0.684177	0.379633	0.248816	-0.0125092	55.4109	0.980228	318	0.05137	274	0.0566288	257	0.0517843	283	0.0532611	1	0.769001	0.631487	0.411955	-0.00750695	92.3341	0.998421
ENSMUSG00000043621	UBX domain protein 10	NM_178671	Ubxn10	9	0.000137526	10	0.000140757	16	0.000294533	11.6667	0.000190939	1	0.482463	0.617726	0.213048	-0.0125035	55.4362	0.936804	3	3.4153e-05	5	7.34614e-05	7	0.000100034	5	6.9216e-05	1	1.57297	0.283615	0.285189	-0.0112472	61.6285	0.710047
ENSMUSG00000066592	predicted gene 10288; predicted gene 7589; ribosomal protein L11; predicted gene 10036; predicted gene 7384; predicted gene 6745; predicted gene 5093		Gm7589	12	0.00409322	7	0.00215954	7	0.00286301	8.66667	0.00303859	1	0.215476	2.96692	0.118937	-0.0125024	55.4411	0.365989	16	0.00411493	11	0.00362272	9	0.00288848	12	0.00354204	1	0.586032	1.56747	1.00005	0.000578984	>Capzb	0.0129942
ENSMUSG00000068134	zinc finger protein 120	NM_181266,NM_023266	Zfp120	470	0.00609845	260	0.00306807	361	0.00562537	363.667	0.00493063	1	0.458292	0.383391	0.274144	-0.0124985	55.4584	0.921883	546	0.00533674	330	0.00413164	380	0.00463533	418.667	0.00470123	1	0.630467	0.578794	0.512691	-0.0067099	103.302	0.88812
ENSMUSG00000044056	EF-hand calcium binding domain 9	NM_027031	Efcab9	4	0.000538151	1	0.000122783	11	0.00177915	5.33333	0.000813362	1	0.431567	1.24032	0.154781	-0.0124961	55.469	0.697122	2	0.000201385	1	0.000129556	8	0.00100907	3.66667	0.000446671	1	2.35528	2.16224	0.374941	-0.00242062	286.351	0.048341
ENSMUSG00000026317	ceroid-lipofuscinosis, neuronal 8	NM_012000	Cln8	546	0.0112098	459	0.0086175	491	0.0121172	498.667	0.0106482	1	0.719911	0.456226	0.224617	-0.0124946	55.4758	0.998848	732	0.0113316	465	0.00921425	493	0.00951901	563.333	0.0100216	1	0.754358	0.582255	0.255066	-0.0108389	63.9499	0.991888
ENSMUSG00000031662	sorting nexin 20	NM_027840	Snx20	25	0.00320746	33	0.00393011	27	0.0041829	28.3333	0.00377349	1	0.557404	0.538497	0.220638	-0.0124878	55.5058	0.979669	1	8.68086e-05	2	0.000242629	2	0.000233734	1.66667	0.000187724	1	2.5406	1.06011	-0.0100457	N/A	N/A	N/A
ENSMUSG00000037492	zinc finger, matrin type 4	NM_177086	Zmat4	29	0.000699654	30	0.000671834	32	0.000932257	30.3333	0.000767915	1	0.330659	0.245316	0.372497	-0.0124876	55.5068	0.706013	9	0.000161609	3	6.89805e-05	5	0.000111763	5.66667	0.000114118	1	0.127162	0.231636	0.194719	-0.0183052	37.8662	0.698286
ENSMUSG00000059975	zinc finger protein 74; hypothetical protein LOC100044255	NM_178384	Zfp74	353	0.00668293	242	0.0041614	330	0.0074916	308.333	0.00611197	1	0.545541	0.394761	0.259372	-0.0124808	55.5371	0.964549	502	0.00716873	331	0.00605114	431	0.00767941	421.333	0.00696643	1	0.797655	0.531235	0.321968	-0.00956254	72.4857	0.995762
ENSMUSG00000053870	fucose-1-phosphate guanylyltransferase	NM_029330	Fpgt	505	0.026504	246	0.0117551	319	0.0200551	356.667	0.019438	1	0.484278	0.475834	0.243474	-0.0124785	55.5473	0.957625	544	0.0214962	295	0.0149351	421	0.0207762	420	0.0190691	1	0.861546	0.681513	0.47936	-0.00612241	113.215	0.997944
ENSMUSG00000040616	transmembrane protein 51	NM_145402	Tmem51	107	0.0103561	102	0.00867825	99	0.0113858	102.667	0.01014	1	0.826323	0.596879	0.190492	-0.0124689	55.5899	0.962758	501	0.0369738	350	0.0330165	331	0.0304494	394	0.0334799	1	0.779831	0.52121	0.395305	-0.00835599	82.9522	0.979118
ENSMUSG00000061068	mast cell protease 3; mast cell protease 4	NM_010779	Mcpt4	5	0.000931402	3	0.000519298	7	0.00157539	5	0.0010087	1	0.871442	1.4288	0.121499	-0.0124688	55.5905	0.640273	0	-2.87067e-06	0	-5.8465e-07	0	-2.74007e-06	0	-2.06513e-06	1	0.899536	6.17754	0.177722	-0.00535584	129.419	0.0859004
ENSMUSG00000042348	ADP-ribosylation factor-like 15	NM_172595	Arl15	778	0.0423619	487	0.024154	649	0.042447	638	0.036321	1	0.704633	0.510282	0.214676	-0.0124606	55.6273	0.997266	932	0.0382351	581	0.0305265	676	0.0346059	729.667	0.0344558	1	0.680155	0.407177	0.271727	-0.011737	59.0568	0.981163
ENSMUSG00000034677	G protein-coupled receptor 142	NM_181749	Gpr142	7	0.000581705	16	0.00123553	5	0.000501994	9.33333	0.000773076	1	1.24492	0.152915	0.340196	-0.0124597	55.6311	0.619405	0	-1.79287e-06	0	-1.39101e-06	0	-8.73113e-07	0	-1.35233e-06	1	1.28505	-40.8567	0.497621	N/A	N/A	N/A
ENSMUSG00000051705	SUMO/sentrin specific peptidase 8	NM_001172068,NM_001172070,NM_027838,NM_001172071,NM_001172069	Senp8	355	0.00576562	195	0.00286519	294	0.00572433	281.333	0.00478505	1	0.525671	0.417454	0.255478	-0.0124583	55.6375	0.965305	464	0.00568116	303	0.00475099	382	0.00583715	383	0.0054231	1	0.746915	0.549496	0.496912	-0.00680426	101.87	0.938133
ENSMUSG00000079555	cDNA sequence BC023882	NM_146159		1405	0.132262	719	0.0617636	992	0.112258	1038.67	0.102094	1	0.469256	0.327772	0.296706	-0.0124564	55.6459	0.890568	1114	0.0787882	752	0.0682266	820	0.0724544	895.333	0.0731564	1	0.588607	0.401186	0.477512	-0.00843384	82.1864	0.809151
ENSMUSG00000027173	DEP domain containing 7	NM_144804	Depdc7	273	0.0218246	175	0.0124598	173	0.0164238	207	0.0169027	1	0.55517	0.415503	0.252792	-0.0124536	55.6584	0.974221	630	0.0381229	433	0.033518	465	0.0351005	509.333	0.0355805	1	0.737475	0.70976	0.466107	-0.00641832	107.995	0.981876
ENSMUSG00000037134	protein arginine methyltransferase 10 (putative)	NM_001081240	Prmt10	1012	0.0185835	613	0.0102874	810	0.0178647	811.667	0.0155785	1	0.534842	0.428998	0.25116	-0.0124525	55.6634	0.971451	910	0.0125659	603	0.0106742	778	0.0134186	763.667	0.0122196	1	0.565699	0.442614	0.280906	-0.0115536	59.9942	0.969924
ENSMUSG00000053334	FIC domain containing	NM_001010825	Ficd	61	0.00353742	79	0.00420827	79	0.00550511	73	0.00441693	1	0.827426	0.297796	0.270409	-0.0124498	55.6752	0.911577	94	0.00411402	64	0.00358307	87	0.00474827	81.6667	0.00414845	1	0.733944	0.450072	0.39026	-0.00899967	77.0192	0.945856
ENSMUSG00000019774	mitochondrial translational release factor 1-like	NM_175374	Mtrf1l	319	0.0153541	196	0.00859851	299	0.017297	271.333	0.0137499	1	0.545182	0.514741	0.228414	-0.0124464	55.6908	0.979417	410	0.0148755	230	0.0106847	299	0.0135325	313	0.0130309	1	0.587853	0.670259	0.367464	-0.00846981	81.8374	0.938565
ENSMUSG00000000489	similar to platelet-derived growth factor B chain; platelet derived growth factor, B polypeptide	NM_011057	Pdgfb	249	0.0156586	374	0.0217845	281	0.0212808	301.333	0.0195746	1	0.936705	0.302008	0.260614	-0.0124426	55.7075	0.901422	215	0.0101643	108	0.00652907	180	0.0106184	167.667	0.0091039	1	0.973994	0.847166	0.57767	-0.0040525	171.042	0.942483
ENSMUSG00000028933	X-ray repair complementing defective repair in Chinese hamster cells 2	NM_020570	Xrcc2	656	0.0189519	457	0.0120574	579	0.0200921	564	0.0170338	1	0.588397	0.351959	0.271405	-0.0124372	55.732	0.951506	777	0.0169117	484	0.0134907	602	0.0163507	621	0.0155844	1	0.686821	0.558343	0.414752	-0.00803419	86.2747	0.971848
ENSMUSG00000041264	ubiquitin specific peptidase like 1	NM_001115150,NM_001115153,NM_001115151,NM_001013378,NM_001115149	Uspl1	2548	0.0149615	1432	0.00767984	2075	0.0146376	2018.33	0.0124263	1	0.534792	0.411511	0.257201	-0.0124338	55.7469	0.966246	2625	0.0116016	1479	0.00837515	2015	0.0111172	2039.67	0.0103647	1	0.62778	0.518515	0.382617	-0.00892384	77.6737	0.957989
ENSMUSG00000038582	PTC7 protein phosphatase homolog (S. cerevisiae)	NM_177242	Pptc7	380	0.0100762	306	0.00728483	376	0.0118981	354	0.00975304	1	0.829685	0.404164	0.23263	-0.0124314	55.7576	0.979405	1122	0.0225679	661	0.017	875	0.0219431	886	0.0205037	1	0.781877	0.590273	0.391512	-0.00801802	86.4487	0.997741
ENSMUSG00000020453	POZ (BTB) and AT hook containing zinc finger 1	NM_019574,NM_001253690,NM_001253691	Patz1	626	0.00538611	744	0.00576891	745	0.00764923	705	0.00626808	1	0.766607	0.324882	0.264655	-0.0124312	55.7585	0.941626	2164	0.0141458	1518	0.012685	1853	0.0150999	1845	0.0139769	1	0.737845	0.505049	0.324919	-0.0097888	70.8102	0.993512
ENSMUSG00000050721	pleckstrin homology domain containing, family O member 2	NM_153119	Plekho2	463	0.0259915	566	0.029424	483	0.0327078	504	0.0293744	1	0.856086	0.359249	0.245044	-0.0124256	55.7838	0.956774	187	0.00783935	133	0.00716246	147	0.00770153	155.667	0.00756778	1	0.749341	0.527191	0.387438	-0.00851071	81.4441	0.983315
ENSMUSG00000035352	chemokine (C-C motif) ligand 12; similar to monocyte chemoattractant protein-5	NM_011331	Ccl12	23	0.00416966	26	0.00438051	21	0.00460009	23.3333	0.00438342	1	0.454719	0.282619	0.323996	-0.0124182	55.8169	0.835594	1	0.000123782	0	-4.93178e-06	0	-8.00089e-06	0.333333	3.69498e-05	1	-0.0487316	1.22193	0.473925	N/A	N/A	N/A
ENSMUSG00000001804	desmoglein 4	NM_181564	Dsg4	0	-4.26314e-07	0	-1.89093e-06	0	-5.51651e-07	0	-9.56299e-07	1	0.588323	0.212756	0.350223	-0.0124166	55.8244	0.771409	3	0.000119822	2	0.000102049	1	4.9776e-05	2	9.0549e-05	1	0.389949	1.08282	0.998623	-0.00125096	554.092	0.033113
ENSMUSG00000036923	storkhead box 1	NM_001033260	Stox1	30	0.00109689	25	0.000847016	36	0.00158879	30.3333	0.00117757	1	0.580644	0.392887	0.259596	-0.0123914	55.9376	0.971523	3	7.93018e-05	4	0.000139882	5	0.000168974	4	0.000129386	1	1.19416	0.351823	1.41474	-0.000831795	833.315	0.0105193
ENSMUSG00000021786	3-oxoacyl-ACP synthase, mitochondrial	NM_027695	Oxsm	154	0.00336828	138	0.00276624	164	0.00430295	152	0.00347916	1	0.649874	0.454126	0.234828	-0.0123894	55.9466	0.997571	213	0.00351344	125	0.00263872	205	0.00421911	181	0.00345709	1	0.587421	0.564308	0.282432	-0.0106882	64.8513	0.977459
ENSMUSG00000079594	cDNA sequence BC1179090	NM_001001332		0	-7.68697e-06	2	0.000888036	0	-1.98939e-05	0.666667	0.000286818	1	2.05913	1.83566	0.0875557	-0.0123886	55.9503	0.42519	6	0.00216054	0	-9.99792e-07	4	0.00179505	3.33333	0.0013182	1	1.36482	-324.206	0.249656	N/A	N/A	N/A
ENSMUSG00000031578	MAK16 homolog (S. cerevisiae)	NM_026453	Mak16	1288	0.127571	782	0.070284	961	0.114178	1010.33	0.104011	1	0.575432	0.537397	0.222833	-0.012381	55.9849	0.983727	1437	0.107186	1075	0.102732	1125	0.104762	1212.33	0.104893	1	0.757698	0.575491	0.438724	-0.00742551	93.3467	0.982136
ENSMUSG00000026248	mitochondrial ribosomal protein L44	NM_001081210	Mrpl44	379	0.0485868	494	0.0570845	314	0.0479664	395.667	0.0512126	1	0.7306	0.44973	0.2295	-0.0123802	55.9885	0.997704	1114	0.108326	968	0.120352	783	0.094936	955	0.107871	1	0.726649	0.64214	0.391595	-0.00786559	88.124	0.993351
ENSMUSG00000022247	brix domain containing 2	NM_026396	Brix1	1942	0.0888194	1176	0.0485612	1516	0.0831013	1544.67	0.073494	1	0.601963	0.544771	0.218926	-0.0123785	55.9963	0.987051	2681	0.0924732	1959	0.0865214	2048	0.0881502	2229.33	0.0890483	1	0.763587	0.597697	0.316943	-0.00935746	74.0743	0.998195
ENSMUSG00000024168	transmembrane protein 204	NM_001001183	Tmem204	767	0.0513224	519	0.0322629	550	0.0444605	612	0.042682	1	0.66466	0.579429	0.207195	-0.0123751	56.0116	0.98367	16	0.000648663	8	0.000479048	7	0.000362586	10.3333	0.000496766	1	0.378361	0.683743	1.14698	-0.00187894	368.903	0.0602245
ENSMUSG00000028287	RIKEN cDNA 1700009N14 gene	NM_001081095	1700009N14Rik	4	0.000584351	6	0.000814505	11	0.00194147	7	0.00111344	1	1.08812	0.816454	0.15436	-0.012373	56.021	0.817483	0	-1.80102e-06	0	-9.17007e-07	0	-3.37678e-06	0	-2.0316e-06	1	-70.3848	3.53002	-40.3486	N/A	N/A	N/A
ENSMUSG00000052751	replication initiator 1	NM_001079904,NM_001079901,NM_001079905,NM_175099,NM_001079902,NM_001079903	Repin1	197	0.00271791	243	0.00305076	252	0.00416627	230.667	0.00331165	1	0.66491	0.328725	0.275229	-0.0123711	56.0297	0.942567	555	0.00580581	356	0.00476095	457	0.00595918	456	0.00550865	1	0.70826	0.554983	0.445832	-0.00754577	91.859	0.962338
ENSMUSG00000060240	cell cycle exit and neuronal differentiation 1	NM_021316	Cend1	11	0.000320346	13	0.000351887	15	0.000527591	13	0.000399941	1	0.871224	0.423719	0.226726	-0.0123671	56.0477	0.977026	1	2.09642e-05	0	-3.96171e-07	1	2.64393e-05	0.666667	1.56691e-05	1	1.18258	-49.2669	1.02178	N/A	N/A	N/A
ENSMUSG00000094179				38	0.0978436	12	0.0280798	21	0.0647874	23.6667	0.0635702	1	0.457593	0.728041	0.203336	-0.0123621	56.0702	0.888933	52	0.100969	16	0.0397754	29	0.0702721	32.3333	0.0703387	1	0.495	0.990878	0.378922	-0.0073067	94.8646	0.702524
ENSMUSG00000021041	neural regeneration protein; alkB, alkylation repair homolog 1 (E. coli)	NM_001013372	2700073G19Rik	9	0.00123349	10	0.00126341	11	0.00181506	10	0.00143732	1	0.192238	0.309187	0.388502	-0.0123468	56.14	0.577274	12	0.00124003	6	0.000793076	9	0.00115943	9	0.00106418	1	0.390534	0.238662	0.332237	-0.013037	53.1679	0.773877
ENSMUSG00000071636	RIMS binding protein 3	NM_001033338	Rimbp3	8	0.00023812	24	0.000661356	13	0.000446681	15	0.000448719	1	1.32201	0.0733328	0.492671	-0.012346	56.1433	0.38901	159	0.00376647	71	0.00214828	144	0.00425115	124.667	0.00338863	1	0.691473	0.660999	0.367488	-0.00825587	83.9581	0.983638
ENSMUSG00000038175	myosin regulatory light chain interacting protein	NM_153789,NM_181043	Mylip	969	0.058033	859	0.0472796	988	0.071226	938.667	0.0588462	1	0.714768	0.461284	0.229119	-0.012345	56.1481	0.999186	1031	0.0464854	618	0.0356802	746	0.0419552	798.333	0.0413736	1	0.727281	0.744553	0.592441	-0.00476572	145.444	0.928185
ENSMUSG00000043298	hypothetical protein LOC632209; RIKEN cDNA C030030A07 gene	NM_001039558	Smco3	59	0.00346504	40	0.00216495	29	0.00203968	42.6667	0.00255656	1	0.679233	0.446944	0.235856	-0.0123422	56.1608	0.997988	30	0.00131887	20	0.00112989	34	0.00187431	28	0.00144102	1	0.544669	0.683101	0.323046	-0.00934865	74.1441	0.922174
ENSMUSG00000031737	Iroquois related homeobox 5 (Drosophila)	NM_018826	Irx5	1443	0.109995	1675	0.117062	1392	0.127312	1503.33	0.118123	1	0.748669	0.273732	0.294318	-0.0123382	56.1791	0.883012	2037	0.117118	1490	0.109626	1720	0.123379	1749	0.116707	1	0.739021	0.437079	0.395326	-0.00899983	77.0178	0.934739
ENSMUSG00000044337	chemokine (C-X-C motif) receptor 7	NM_007722	Ackr3	1143	0.06025	731	0.0348243	835	0.0525822	903	0.0492188	1	0.452089	0.513379	0.24406	-0.0123313	56.2104	0.938022	2071	0.0824826	1224	0.0623776	1549	0.0769656	1614.67	0.0739419	1	0.823814	0.906249	0.766384	-0.0023095	300.129	0.853963
ENSMUSG00000072812	AHNAK nucleoprotein 2; similar to Unknown (protein for IMAGE:3599271)		Ahnak2	10	0.000107725	19	0.000186568	12	0.000155671	13.6667	0.000149988	1	0.519806	0.22809	0.353639	-0.0123306	56.2138	0.778089	12	9.73988e-05	22	0.000228684	9	9.10764e-05	14.3333	0.000139053	1	0.976361	0.590269	1.33393	0.00011785	>Capzb	0.000726115
ENSMUSG00000051596	otopetrin 1	NM_172709	Otop1	5	0.000147213	5	0.000136796	6	0.000213428	5.33333	0.000165812	1	0.871442	0.121924	0.425245	-0.0123281	56.2251	0.554693	0	-4.53724e-07	0	-1.54012e-07	0	-3.71213e-07	0	-3.26316e-07	1	0.899536	-132.33	0.622027	N/A	N/A	N/A
ENSMUSG00000050855	cDNA sequence BC027344	NM_173738	Zfp940	208	0.00411057	132	0.00238114	198	0.00470348	179.333	0.00373173	1	0.627854	0.461918	0.237177	-0.0123269	56.2303	0.995893	256	0.00381247	144	0.00274604	192	0.00356711	197.333	0.00337521	1	0.534277	0.575118	0.358911	-0.00925702	74.878	0.926056
ENSMUSG00000075227	zinc finger, HIT domain containing 2	NM_013859	Znhit2	181	0.0258377	263	0.0342965	187	0.0318734	210.333	0.0306692	1	0.657802	0.383726	0.257503	-0.0123197	56.2634	0.977833	387	0.0417917	309	0.042671	377	0.050778	357.667	0.0450802	1	0.643799	0.475514	0.272723	-0.0113084	61.2949	0.992705
ENSMUSG00000032360	hypocretin (orexin) receptor 2	NM_198962	Hcrtr2	13	0.000645205	10	0.000461193	11	0.000659584	11.3333	0.000588661	1	0.804044	0.428639	0.231952	-0.0123132	56.2932	0.987968	0	-1.98858e-06	0	-5.19232e-07	0	-1.14721e-06	0	-1.21834e-06	1	-21.1725	1.85326	0.339287	N/A	N/A	N/A
ENSMUSG00000043969	empty spiracles homolog 2 (Drosophila)	NM_010132	Emx2	543	0.0216835	558	0.0206737	664	0.0320171	588.333	0.0247914	1	0.799063	0.379112	0.247243	-0.0123075	56.3193	0.972517	83	0.00243189	57	0.0021689	74	0.00272066	71.3333	0.00244049	1	0.788314	0.584036	0.598533	-0.00534372	129.713	0.885837
ENSMUSG00000068547	chloride channel calcium activated 6	NM_207208	Clca6	0	-6.25115e-07	0	-2.97078e-06	0	-1.38669e-06	0	-1.66086e-06	1	1.76497	0.22694	0.262667	-0.0122944	56.379	0.662905	7	0.000175698	5	0.000160326	4	0.000125122	5.33333	0.000153715	1	1.16985	1.15501	0.748967	-0.0011288	614.056	0.186781
ENSMUSG00000056204	pyroglutamyl-peptidase I	NM_023217	Pgpep1	925	0.0347008	815	0.0280802	925	0.0417675	888.333	0.0348495	1	0.698036	0.408416	0.247039	-0.0122909	56.3952	0.989281	994	0.028075	615	0.0222435	709	0.0249788	772.667	0.0250991	1	0.693091	0.602854	0.434031	-0.00748779	92.5704	0.974738
ENSMUSG00000059475	zinc finger protein 426	NM_001110309,NM_146221	Zfp426	990	0.00743642	596	0.00409127	888	0.00801849	824.667	0.00651539	1	0.539353	0.513938	0.235225	-0.0122818	56.4369	0.976787	1032	0.00583518	599	0.00433915	801	0.00565252	810.667	0.00527562	1	0.622586	0.656351	0.46033	-0.00701466	98.8141	0.926527
ENSMUSG00000026564	dual specificity phosphatase 27 (putative)	NM_001033344,NM_001160049	Dusp27	114	0.005211	187	0.00794158	91	0.00502564	130.667	0.00605941	1	0.840761	0.271814	0.289727	-0.0122762	56.4629	0.873283	1	1.83869e-05	2	7.90727e-05	0	-8.74105e-06	1	2.95729e-05	1	5.81698	0.670625	0.423798	-0.00392428	176.63	0.0728195
ENSMUSG00000089542				18	0.0230308	14	0.0164637	19	0.0291602	17	0.0228849	1	0.870752	0.441298	0.225427	-0.0122754	56.4663	0.979448	19	0.0183009	10	0.0123342	22	0.0264603	17	0.0190318	1	0.738226	0.792399	0.181286	-0.0120629	57.4612	0.898042
ENSMUSG00000031533	mitochondrial ribosomal protein S31	NM_020560	Mrps31	864	0.103469	540	0.0590202	570	0.0819751	658	0.0814882	1	0.538245	0.5681	0.224404	-0.012266	56.5095	0.968395	666	0.0599098	559	0.0645142	533	0.0599276	586	0.0614505	1	0.795215	0.570143	0.431174	-0.00748866	92.5596	0.985146
ENSMUSG00000061524	zinc finger protein of the cerebellum 2	NM_009574	Zic2	178	0.0102064	171	0.00911125	180	0.0124695	176.333	0.0105957	1	0.729466	0.286475	0.292947	-0.0122646	56.516	0.896925	0	-3.14571e-05	0	-1.02579e-05	0	-2.16881e-05	0	-2.11344e-05	1	0.752982	1.2386	0.428507	-0.00515164	134.549	0.593989
ENSMUSG00000053985	zinc finger protein 14	NM_011748,NM_178733	Zfp14	118	0.014376	75	0.00839053	95	0.0139113	96	0.012226	1	0.501327	0.230265	0.359118	-0.0122603	56.5361	0.771545	90	0.0082355	54	0.00633703	79	0.00903328	74.3333	0.0078686	1	0.61142	0.560819	0.619657	-0.00565562	122.559	0.750436
ENSMUSG00000028040	ephrin A4	NM_007910	Efna4	574	0.0655978	615	0.0635282	625	0.0854333	604.667	0.0715198	1	0.712591	0.463299	0.231913	-0.012259	56.5418	0.99927	1408	0.121859	1079	0.119426	1196	0.129065	1227.67	0.12345	1	0.721989	0.504891	0.325625	-0.00981048	70.6537	0.992891
ENSMUSG00000042207	lysine (K)-specific demethylase 5B	NM_152895	Kdm5b	2111	0.0256544	1949	0.0215829	2081	0.0302985	2047	0.0258452	1	0.754078	0.3669	0.257071	-0.0122559	56.5563	0.96882	5287	0.0486672	2637	0.0310358	3629	0.0416459	3851	0.0404497	1	0.71592	0.586416	0.344487	-0.00899116	77.092	0.997153
ENSMUSG00000047649	CD3E antigen, epsilon polypeptide associated protein	NM_145822	Cd3eap	369	0.0355816	351	0.0304311	332	0.0381575	350.667	0.0347234	1	0.764972	0.463355	0.228176	-0.0122492	56.5871	0.996084	1074	0.0785476	731	0.068359	815	0.0743202	873.333	0.0737423	1	0.724252	0.447559	0.28055	-0.0111342	62.2541	0.990348
ENSMUSG00000064125	cDNA sequence BC068157	NM_207203	BC068157	9	0.000245077	27	0.000685603	32	0.00105585	22.6667	0.000662176	1	2.23434	0.249224	0.238281	-0.0122414	56.6232	0.611179	26	0.000536949	6	0.000157748	18	0.000462086	16.6667	0.000385594	1	0.852842	1.56646	1.22402	0.00245557	>Capzb	0.425813
ENSMUSG00000055782	ATP-binding cassette, sub-family D (ALD), member 2	NM_011994	Abcd2	240	0.00798173	156	0.00482059	209	0.0083972	201.667	0.00706651	1	0.653604	0.48674	0.231971	-0.0122379	56.6394	0.998717	3	5.05887e-05	1	2.65908e-05	2	4.7864e-05	2	4.16812e-05	1	-0.328083	2.17814	-0.103538	N/A	N/A	N/A
ENSMUSG00000074406	zinc finger protein 628	NM_170759	Zfp628	131	0.00676016	161	0.00753792	160	0.00986089	150.667	0.00805299	1	0.709015	0.409458	0.247862	-0.0122369	56.644	0.989118	476	0.0186721	278	0.0139384	392	0.0191677	382	0.0172594	1	0.658568	0.531571	0.254657	-0.0113538	61.0499	0.996564
ENSMUSG00000052450	RIKEN cDNA 2810055G20 gene			12	0.000858317	9	0.000594892	8	0.000689705	9.66667	0.000714305	1	0.581481	0.273295	0.318832	-0.0122364	56.6463	0.861894	4	0.000213153	3	0.000206092	3	0.000200503	3.33333	0.000206583	1	-0.00744933	0.47898	1.00182	N/A	N/A	N/A
ENSMUSG00000040138	Norrie disease (pseudoglioma) (human)	NM_010883	Ndp	10	0.000945727	4	0.000348897	14	0.00160109	9.33333	0.000965237	1	0.695807	0.770095	0.181609	-0.0122361	56.6476	0.909927	8	0.00056846	2	0.00018209	2	0.000175233	4	0.000308595	1	0.878197	1.4397	2.02478	0.0054299	>Capzb	0.860794
ENSMUSG00000048047	zinc finger and BTB domain containing 33	NM_001079513,NM_020256	Zbtb33	1224	0.022823	714	0.0119521	1006	0.022453	981.333	0.019076	1	0.667445	0.472012	0.234492	-0.0122335	56.6596	0.999299	2524	0.0355929	1459	0.0263224	1720	0.0302484	1901	0.0307212	1	0.65809	0.468248	0.280931	-0.0111342	62.2541	0.991635
ENSMUSG00000020205	pleckstrin homology-like domain, family A, member 1	NM_009344	Phlda1	292	0.0272567	331	0.027823	281	0.0311592	301.333	0.0287463	1	0.605756	0.334144	0.285646	-0.0122312	56.6705	0.93535	1035	0.07342	692	0.0627511	851	0.0752645	859.333	0.0704785	1	0.614861	0.616109	0.359043	-0.00881313	78.6494	0.965566
ENSMUSG00000040034	nucleoporin 43	NM_145706	Nup43	1458	0.0633397	883	0.0347675	958	0.0498725	1099.67	0.0493266	1	0.48472	0.501909	0.246497	-0.0122293	56.679	0.954693	1754	0.057413	1278	0.0535833	1260	0.0514869	1430.67	0.054161	1	0.692953	0.551812	0.332831	-0.00945456	73.3135	0.994792
ENSMUSG00000090019		NM_008376,NM_175860		119	0.0072517	138	0.00781448	117	0.00861331	124.667	0.00789317	1	1.01058	0.390458	0.23263	-0.0122279	56.6858	0.938485	0	-2.23504e-05	0	-8.7979e-06	1	4.22495e-05	0.333333	3.70041e-06	1	1.04316	-3.12548	-0.120658	N/A	N/A	N/A
ENSMUSG00000039783	kynurenine 3-monooxygenase (kynurenine 3-hydroxylase)	NM_133809	Kmo	15	0.000267715	15	0.000244983	22	0.000474502	17.3333	0.000329066	1	0.926131	0.413473	0.231675	-0.0122107	56.7656	0.963576	8	0.000106927	13	0.000223411	3	4.95316e-05	8	0.000126623	1	2.203	0.498176	1.34805	0.00093786	>Capzb	0.0138702
ENSMUSG00000028282	caspase 8 associated protein 2	NM_001122978,NM_011997	Casp8ap2	3635	0.0432092	1935	0.0210012	2767	0.0395639	2779	0.0345915	1	0.582857	0.460651	0.246488	-0.0122092	56.7724	0.987346	3327	0.029743	2000	0.0229201	2191	0.024451	2506	0.0257047	1	0.694866	0.503786	0.326705	-0.00985719	70.3189	0.990478
ENSMUSG00000027684	ecotropic viral integration site 1	NM_021442,NM_007963	Mecom	490	0.00206895	395	0.00154398	471	0.00239772	452	0.00200355	1	0.822937	0.338746	0.263815	-0.0122062	56.7864	0.943248	147	0.00046174	94	0.000380669	157	0.000618903	132.667	0.000487104	1	0.948361	0.834213	0.573722	-0.00418729	165.536	0.962279
ENSMUSG00000048707	RIKEN cDNA C430004E15 gene	NM_175286	Tprn	118	0.00539657	105	0.00433434	86	0.00467181	103	0.00480091	1	0.632017	0.399789	0.259493	-0.0122041	56.7963	0.980496	242	0.00836984	186	0.00822963	222	0.00957968	216.667	0.00872638	1	0.793064	0.67857	0.436388	-0.00686394	100.984	0.998562
ENSMUSG00000074682	zinc finger, CCHC domain containing 3	NM_175126	Zcchc3	881	0.0521301	1020	0.0553597	899	0.0638098	933.333	0.0570999	1	0.849746	0.343412	0.260069	-0.0122027	56.8028	0.94352	1369	0.0611397	905	0.0517066	1176	0.065514	1150	0.0594534	1	0.552024	0.484572	0.286013	-0.0111905	61.9407	0.968128
ENSMUSG00000038806	cDNA sequence BC031781	NM_145943	Sde2	936	0.0540323	889	0.046884	868	0.0601383	897.667	0.0536849	1	0.794402	0.440726	0.233482	-0.0122023	56.8048	0.990788	1376	0.0599293	960	0.0535094	1058	0.057481	1131.33	0.0569732	1	0.643092	0.576198	0.322775	-0.00963059	71.9735	0.986164
ENSMUSG00000085887				3	0.000201281	12	0.000749638	4	0.000325402	6.33333	0.00042544	1	0.874569	0.510193	0.211868	-0.0122018	56.8071	0.97742	4	0.000202349	1	6.39793e-05	0	-5.6597e-07	1.66667	8.85874e-05	1	-0.00276771	2.89653	-111.27	N/A	N/A	N/A
ENSMUSG00000042063	zinc finger protein 386 (Kruppel-like)	NM_001004066,NM_019565	Zfp386	928	0.0824745	506	0.0410355	747	0.0798196	727	0.0677765	1	0.464374	0.399223	0.280844	-0.0121958	56.8349	0.923402	768	0.0512961	532	0.0455724	611	0.050972	637	0.0492802	1	0.726275	0.537496	0.492182	-0.00697955	99.3111	0.929742
ENSMUSG00000080364	ENSMUSG00000080364			22	0.031959	21	0.0279899	32	0.0558487	25	0.0385992	1	0.755923	0.237004	0.32274	-0.0121949	56.839	0.819475	85	0.093927	25	0.0352972	59	0.0812385	56.3333	0.0701542	1	0.288504	0.3748	0.236683	-0.014238	48.6831	0.83567
ENSMUSG00000031767	nudix (nucleoside diphosphate linked moiety X)-type motif 7	NM_024437,NM_024446	Nudt7	211	0.00594302	157	0.00403921	173	0.00584994	180.333	0.00527739	1	0.609837	0.490274	0.236772	-0.0121949	56.8391	0.993833	223	0.00472843	162	0.00440066	183	0.00484432	189.333	0.0046578	1	0.734836	0.78735	0.425813	-0.00666871	103.94	0.954061
ENSMUSG00000016619	nucleoporin 50	NM_016714	Nup50	1819	0.0701382	1832	0.0645082	1875	0.0867859	1842	0.0738108	1	0.809573	0.391979	0.247526	-0.0121735	56.9391	0.975493	3653	0.106505	2152	0.0802436	2562	0.0931276	2789	0.093292	1	0.662548	0.581667	0.299254	-0.0100337	69.082	0.991729
ENSMUSG00000054892	TXK tyrosine kinase	NM_013698,NM_001122754	Txk	1	3.97511e-05	3	0.000110883	3	0.000146034	2.33333	9.88896e-05	1	1.74258	0.20676	0.281485	-0.012171	56.9507	0.636323	5	0.000151692	2	7.74525e-05	0	-2.53997e-07	2.33333	7.62969e-05	1	1.16933	-0.00144086	-297.134	N/A	N/A	N/A
ENSMUSG00000037434	solute carrier family 30 (zinc transporter), member 1	NM_009579	Slc30a1	272	0.00838151	241	0.00670397	263	0.00966028	258.667	0.00824858	1	0.739269	0.340607	0.271803	-0.0121696	56.9571	0.949415	640	0.0149302	435	0.0129788	598	0.0173988	557.667	0.0151026	1	0.575457	0.593592	0.280439	-0.0106053	65.3588	0.968946
ENSMUSG00000029729	zinc finger with KRAB and SCAN domains 1	NM_133906,NM_029869	Zkscan1	2336	0.016547	1356	0.00869409	2113	0.0179543	1935	0.0143985	1	0.574178	0.417494	0.261663	-0.012166	56.9741	0.975298	3510	0.0187613	2109	0.0144304	2727	0.0181834	2782	0.017125	1	0.616982	0.467343	0.323988	-0.0103373	67.053	0.970005
ENSMUSG00000040124	golgin, RAB6-interacting	NM_178883	Gorab	1141	0.0834767	686	0.0461165	921	0.0811583	916	0.0702505	1	0.557791	0.438325	0.257232	-0.0121658	56.975	0.976508	675	0.0370167	455	0.0320458	496	0.0339928	542	0.0343518	1	0.584111	0.425995	0.416936	-0.00911684	76.0293	0.881262
ENSMUSG00000049532	sal-like 2 (Drosophila)	NM_015772,NM_001244916	Sall2	779	0.0143411	1048	0.0177636	976	0.0215829	934.333	0.0178958	1	0.880049	0.300329	0.278052	-0.0121481	57.0579	0.899307	1337	0.0185901	750	0.0133338	1171	0.020302	1086	0.0174086	1	0.631951	0.444364	0.291446	-0.0111314	62.2697	0.98044
ENSMUSG00000043487	acyl-CoA thioesterase 6	NM_172580	Acot6	163	0.00881692	121	0.00602517	133	0.00865757	139	0.00783322	1	0.630184	0.397541	0.262766	-0.012147	57.0631	0.978372	128	0.00520146	72	0.00375048	93	0.00471932	97.6667	0.00455709	1	0.630513	0.770303	0.472753	-0.0063173	109.722	0.895689
ENSMUSG00000044095	RIKEN cDNA 2410075B13 gene		Ccdc166	75	0.00592957	122	0.00876325	102	0.00966751	99.6667	0.00812011	1	0.917396	0.442588	0.22681	-0.0121445	57.0752	0.970235	263	0.0157998	200	0.0153571	202	0.0151241	221.667	0.015427	1	0.64462	0.482744	0.365874	-0.00939286	73.7951	0.961551
ENSMUSG00000082647	ENSMUSG00000082647			1	0.00028318	0	-5.1064e-06	5	0.00171428	2	0.000664117	1	1.74743	0.141837	0.341326	-0.0121392	57.1001	0.527332	4	0.000861984	1	0.000275581	5	0.00134118	3.33333	0.000826248	1	0.876443	0.721882	0.599402	-0.00449359	154.252	0.989815
ENSMUSG00000020399	hepatitis A virus cellular receptor 2	NM_134250	Havcr2	16	0.000560396	6	0.000195344	10	0.000422567	10.6667	0.000392769	1	0.544834	1.02011	0.170392	-0.0121366	57.1121	0.795211	2	5.10789e-05	0	-2.19927e-07	2	6.50742e-05	1.33333	3.86444e-05	1	-0.019017	-106.304	-0.00281499	N/A	N/A	N/A
ENSMUSG00000074661	expressed sequence AI452195		Pde4d	186	0.01839	153	0.0140159	184	0.0219399	174.333	0.0181152	1	0.773074	0.292875	0.291744	-0.0121284	57.1506	0.899214	68	0.00501482	31	0.00293781	59	0.00544564	52.6667	0.00446609	1	0.495522	0.555079	0.269723	-0.011303	61.3243	0.94448
ENSMUSG00000038843	glucosaminyl (N-acetyl) transferase 1, core 2; similar to glucosaminyl (N-acetyl) transferase 1, core 2	NM_010265,NM_173442,NM_001136484	Gcnt1	288	0.00351949	168	0.00180201	249	0.00363236	235	0.00298462	1	0.543265	0.423727	0.265025	-0.0121257	57.1633	0.967258	713	0.00659918	540	0.00639338	535	0.00617484	596	0.00638913	1	0.801071	0.577109	0.444309	-0.00724792	95.634	0.983523
ENSMUSG00000092867				6	0.0121942	15	0.0283444	9	0.0220619	10	0.0208668	1	1.4538	0.080945	0.474767	-0.0121167	57.206	0.395548	7	0.010717	2	0.0038935	5	0.00953504	4.66667	0.0080485	1	0.665562	1.81663	-0.00279476	N/A	N/A	N/A
ENSMUSG00000035104	family with sequence similarity 176, member A	NM_145570	Eva1a	91	0.00432282	80	0.00348075	82	0.00468236	84.3333	0.00416198	1	0.620832	0.380867	0.270816	-0.0121152	57.2131	0.968099	93	0.00332504	71	0.00325197	74	0.00330229	79.3333	0.0032931	1	0.80571	0.201608	0.350759	-0.0120786	57.3865	0.74346
ENSMUSG00000072582	peptidyl-tRNA hydrolase 2	NM_175004,NM_001098810	Ptrh2	931	0.0275798	746	0.020025	744	0.0264048	807	0.0246698	1	0.617493	0.413425	0.260371	-0.0121131	57.2231	0.98221	1619	0.036227	1143	0.0327274	1123	0.0313437	1295	0.0334327	1	0.716251	0.588429	0.298669	-0.00988571	70.1161	0.996859
ENSMUSG00000030543	mesoderm posterior 2	NM_008589	Mesp2	3	0.000279789	6	0.00051204	7	0.000790509	5.33333	0.000527446	1	0.268219	0.730041	0.24139	-0.0121121	57.2276	0.720002	19	0.00135756	10	0.000912782	12	0.00106784	13.6667	0.00111273	1	1.04719	1.22599	0.999464	0.000716593	>Capzb	0.222402
ENSMUSG00000040429	mitochondrial transcription termination factor	NM_001013023,NM_172135	Mterf	93	0.00449265	57	0.00250801	53	0.00306122	67.6667	0.00335396	1	0.40117	0.196406	0.421047	-0.0121088	57.2432	0.654898	121	0.0044065	69	0.00321736	85	0.00386451	91.6667	0.00382946	1	0.600005	0.334336	0.41092	-0.00993566	69.7636	0.828397
ENSMUSG00000091160				12	0.00765647	9	0.00528976	8	0.00614597	9.66667	0.00636407	1	0.79727	0.136931	0.424893	-0.012106	57.2564	0.584716	9	0.00431248	5	0.00307146	5	0.00299142	6.33333	0.00345846	1	1.04105	0.288166	1.40086	-0.00174582	397.033	0.0346324
ENSMUSG00000029587	zinc finger protein 12	NM_177681	Zfp12	1027	0.0122585	807	0.00877792	996	0.0142722	943.333	0.0117696	1	0.685821	0.359165	0.272712	-0.0120991	57.2891	0.960996	1350	0.0121484	958	0.0110375	1137	0.012766	1148.33	0.011984	1	0.734917	0.58312	0.438351	-0.00743756	93.1955	0.980801
ENSMUSG00000063506	Rho GTPase activating protein 22	NM_153800	Arhgap22	9	0.000168498	9	0.000100556	8	0.00014219	8.66667	0.000137081	1	0.410931	0.704589	0.221533	-0.0120926	57.3199	0.867717	304	0.00471562	195	0.00386452	265	0.00512319	254.667	0.00456778	1	0.808156	0.792156	0.542664	-0.00495882	139.781	0.981929
ENSMUSG00000020653	Kruppel-like factor 11	NM_178357	Klf11	349	0.0112427	369	0.0109593	386	0.0149588	368	0.0123869	1	0.71796	0.303352	0.293761	-0.0120905	57.3299	0.910826	317	0.00767962	197	0.00611205	300	0.00907226	271.333	0.00762131	1	0.793661	0.882253	0.532899	-0.00476086	145.593	0.920713
ENSMUSG00000046856	G protein-coupled receptor 1	NM_146250	Gpr1	7	0.000662581	2	0.000172669	4	0.000454823	4.33333	0.000430024	1	0.621583	0.620162	0.213246	-0.012083	57.3656	0.970809	2	0.000140728	2	0.000182194	3	0.000266098	2.33333	0.00019634	1	1.17751	1.08112	0.33294	-0.00647584	107.036	0.637995
ENSMUSG00000088268				4	0.00859992	3	0.00590223	6	0.0155132	4.33333	0.0100051	1	0.437481	0.415292	0.284946	-0.0120732	57.4122	0.908639	6	0.00973393	3	0.00622783	6	0.0121369	5	0.00936621	1	-0.00122967	0.238969	0.332691	N/A	N/A	N/A
ENSMUSG00000058638	zinc finger protein 110	NM_022981	Zfp110	1445	0.0328208	845	0.0174546	1062	0.0289313	1117.33	0.0264022	1	0.499128	0.442034	0.267267	-0.0120725	57.4155	0.952997	1624	0.02778	1068	0.0234042	1263	0.0269725	1318.33	0.0260522	1	0.644458	0.578823	0.375546	-0.00865137	80.1199	0.974812
ENSMUSG00000038618	Ras association (RalGDS/AF-6) domain family (N-terminal) member 7	NM_025886	Rassf7	176	0.00571488	180	0.00507391	186	0.0071007	180.667	0.00596316	1	0.646129	0.459762	0.24574	-0.0120711	57.4221	0.996244	1043	0.0259163	756	0.0240084	914	0.0283102	904.333	0.0260783	1	0.739191	0.589779	0.472051	-0.00692205	100.136	0.969976
ENSMUSG00000094256				3	0.00113999	3	0.00104764	4	0.00182382	3.33333	0.00133715	1	1.455	0.408923	0.212949	-0.0120639	57.4562	0.825389	2	0.000570233	2	0.000731781	4	0.00142688	2.66667	0.000909631	1	-0.00925418	1.80477	0.499734	N/A	N/A	N/A
ENSMUSG00000044636	cysteine-serine-rich nuclear protein 2	NM_153407	Csrnp2	491	0.0217496	464	0.01876	544	0.0289301	499.667	0.0231466	1	0.783545	0.407161	0.2492	-0.0120619	57.4656	0.982903	938	0.0314059	551	0.0235971	719	0.030015	736	0.0283393	1	0.639435	0.738002	0.555888	-0.00540245	128.302	0.865901
ENSMUSG00000028271	general transcription factor IIB	NM_145546	Gtf2b	1564	0.226496	1015	0.134173	1088	0.189222	1222.33	0.183297	1	0.545137	0.557219	0.233658	-0.0120506	57.5196	0.971921	1386	0.150921	1059	0.147844	1053	0.143227	1166	0.14733	1	0.770723	0.744726	0.423159	-0.00680942	101.792	0.979932
ENSMUSG00000034792	guanine nucleotide binding protein, alpha 15	NM_010304	Gna15	25	0.00122327	24	0.000969131	24	0.00138822	24.3333	0.00119354	1	0.367951	0.451811	0.286716	-0.012041	57.5655	0.858608	236	0.00892438	168	0.00811823	129	0.00607952	177.667	0.00770737	1	0.649475	0.648661	0.619386	-0.00510061	135.895	0.81531
ENSMUSG00000091900				1062	0.124846	236	0.0252656	787	0.111224	695	0.0871116	1	0.525637	0.491573	0.251487	-0.0120395	57.5727	0.970321	971	0.085847	275	0.0311706	674	0.0744017	640	0.0638064	1	0.664377	0.460488	0.419441	-0.00862726	80.3439	0.923392
ENSMUSG00000057899	G protein-coupled receptor 111	NM_001033493	Gpr111	13	0.00071612	5	0.000202157	9	0.000576014	9	0.000498097	1	0.462015	0.90819	0.191201	-0.0120357	57.5911	0.819056	77	0.00324581	58	0.00312525	56	0.00294286	63.6667	0.00310464	1	0.607798	0.659415	0.428036	-0.00749986	92.4214	0.931434
ENSMUSG00000036834	phospholipase C, eta 1	NM_001177732,NM_001177733,NM_183191	Plch1	31	9.5345e-05	20	5.47209e-05	33	0.000121455	28	9.05068e-05	1	0.779434	0.798276	0.179154	-0.0120283	57.6264	0.890826	99	0.000231147	53	0.000158224	69	0.000200816	73.6667	0.000196729	1	1.11115	0.775325	0.709644	-0.00281829	245.946	0.775771
ENSMUSG00000079509	zinc finger protein X-linked; similar to zinc finger protein	NM_001044386,NM_011768		2368	0.0184105	1190	0.00843617	1847	0.0172455	1801.67	0.0146974	1	0.569597	0.454748	0.256778	-0.012027	57.6325	0.981255	2447	0.0143199	1330	0.00997291	1870	0.013662	1882.33	0.0126516	1	0.749297	0.635947	0.485138	-0.00648761	106.842	0.980406
ENSMUSG00000027314	delta-like 4 (Drosophila)	NM_019454	Dll4	234	0.00970605	504	0.0194214	263	0.0131772	333.667	0.0141016	1	1.31827	0.335382	0.242466	-0.0120258	57.6385	0.833965	12	0.000345232	10	0.000377509	10	0.000366684	10.6667	0.000363142	1	1.1533	0.985187	1.3572	0.0021182	>Capzb	0.744858
ENSMUSG00000033182	kelch domain containing 6	NM_029013,NM_001142724	Kbtbd12	9	0.000315013	6	0.000194756	10	0.000422283	8.33333	0.000310684	1	0.38777	0.102384	0.596281	-0.0120215	57.6588	0.429547	4	0.000104662	1	3.35171e-05	3	9.79981e-05	2.66667	7.87256e-05	1	-0.00371313	-0.0028959	0.664208	N/A	N/A	N/A
ENSMUSG00000047819	tigger transposable element derived 4	NM_207278	Tigd4	12	0.000633322	9	0.000416311	10	0.000628915	10.3333	0.000559516	1	0.93924	0.358105	0.255771	-0.0120166	57.6826	0.935408	24	0.000957721	29	0.00148093	22	0.00109522	25	0.00117796	1	1.21909	0.348116	0.635755	-0.00591127	117.259	0.486362
ENSMUSG00000031925	similar to Maml2 protein; mastermind like 2 (Drosophila)	NM_001013813,NM_173776	Maml2	399	0.00497089	416	0.00468807	412	0.00613956	409	0.00526618	1	0.844955	0.357858	0.26273	-0.0120162	57.6842	0.950542	1323	0.012517	763	0.00922806	897	0.0105786	994.333	0.0107746	1	0.743483	0.519775	0.349542	-0.00922167	75.165	0.99156
ENSMUSG00000090145		NM_201410		0	-2.70847e-06	0	-1.72995e-05	0	-1.21966e-05	0	-1.07348e-05	1	2.04737	0.189116	0.28984	-0.0120126	57.7016	0.565754	25	0.000761255	24	0.000933612	29	0.00110051	26	0.000931792	1	1.35702	0.96251	0.826447	-0.000846996	818.36	0.103503
ENSMUSG00000070140	ENSMUSG00000070140		Mir483	11	0.0280326	7	0.0165767	5	0.0153945	7.66667	0.0200013	1	0.316458	0.34952	0.340196	-0.0120093	57.7173	0.758992	0	-8.63991e-05	0	-1.86628e-05	0	-2.67755e-05	0	-4.39458e-05	1	-25.6763	-93.3867	0.497621	N/A	N/A	N/A
ENSMUSG00000066415	male-specific lethal 2 homolog (Drosophila)	NM_001100451	Msl2	1080	0.0401535	973	0.0327048	1189	0.0529338	1080.67	0.0419307	1	0.754411	0.367732	0.267076	-0.0120056	57.7355	0.964904	2382	0.0670116	1665	0.0599125	2034	0.0713514	2027	0.0660918	1	0.865508	0.572113	0.432598	-0.00732231	94.6623	0.979225
ENSMUSG00000075000	nuclear receptor binding factor 2	NM_001036293	Nrbf2	242	0.018546	393	0.0276989	203	0.0186902	279.333	0.021645	1	0.686034	0.448141	0.248001	-0.0119991	57.7667	0.99663	273	0.015757	272	0.0200974	203	0.0146224	249.333	0.0168256	1	0.840364	0.71734	0.437991	-0.00657232	105.465	0.992993
ENSMUSG00000042717	protein phosphatase 1, regulatory (inhibitor) subunit 3A	NM_080464	Ppp1r3a	6	0.00015471	4	9.5842e-05	4	0.00012461	4.66667	0.000125054	1	0.435721	0.765426	0.212623	-0.0119974	57.7749	0.861257	0	-4.76831e-07	0	-1.07903e-07	0	-2.16732e-07	0	-2.67155e-07	1	0.449768	3.3094	0.311013	-0.0048844	141.91	0.131278
ENSMUSG00000001300	ephrin B2	NM_010111	Efnb2	1010	0.0366212	1241	0.0400463	1093	0.0468686	1114.67	0.0411787	1	0.8307	0.327535	0.276691	-0.0119956	57.7835	0.927852	6885	0.191515	3863	0.137309	4950	0.171615	5232.67	0.166813	1	0.776448	0.582578	0.357468	-0.00864833	80.1481	0.999589
ENSMUSG00000047867	GTPase, IMAP family member 6	NM_153175	Gimap6	803	0.0257359	492	0.0146517	593	0.0229618	629.333	0.0211165	1	0.564309	0.563846	0.232328	-0.0119945	57.7888	0.975949	3	-6.86296e-06	2	4.5214e-05	0	-3.99373e-05	1.66667	-5.2876e-07	1	-5.61848	-0.889405	-1.9181	N/A	N/A	N/A
ENSMUSG00000086851				6	0.000392405	5	0.000299273	11	0.000867972	7.33333	0.000519883	1	0.72414	0.495292	0.233045	-0.0119906	57.8075	0.999279	18	0.000893117	6	0.000380497	12	0.000741522	12	0.000671712	1	0.649779	1.32273	0.332861	-0.00678071	102.223	0.589476
ENSMUSG00000020105	leucine-rich repeats and immunoglobulin-like domains 3	NM_177152	Lrig3	1007	0.0457026	913	0.0381105	819	0.0447046	913	0.0428392	1	0.686877	0.430566	0.253368	-0.0119882	57.8192	0.992768	1105	0.0377633	625	0.0273454	708	0.0301886	812.667	0.0317657	1	0.899527	0.637961	0.329952	-0.00863504	80.2715	0.976821
ENSMUSG00000025821	zinc finger protein 282	NM_146175	Zfp282	872	0.0186423	1031	0.0199128	874	0.0222764	925.667	0.0202772	1	0.790734	0.363136	0.2664	-0.011987	57.8251	0.959287	3169	0.0515	2001	0.0415664	2315	0.046899	2495	0.0466551	1	0.711607	0.516043	0.30189	-0.0102447	67.6594	0.997846
ENSMUSG00000038037	suppressor of cytokine signaling 1	NM_009896	Socs1	105	0.0157628	114	0.0157461	82	0.0147032	100.333	0.0154041	1	0.704339	0.400495	0.261738	-0.0119718	57.8982	0.982575	136	0.0153907	79	0.0114394	141	0.019923	118.667	0.0155844	1	0.67939	0.885055	0.276081	-0.00917305	75.5634	0.873395
ENSMUSG00000064621	ENSMUSG00000064496; ENSMUSG00000065757; ENSMUSG00000065749; ENSMUSG00000064621; ENSMUSG00000064487; ENSMUSG00000064417; ENSMUSG00000084549; ENSMUSG00000084487; ENSMUSG00000064720; ENSMUSG00000084459; ENSMUSG00000064545; ENSMUSG00000064726; ENSMUSG00000064679; ENSMUSG00000084691; ENSMUSG00000084604; ENSMUSG00000064452; ENSMUSG00000065013; ENSMUSG00000065022		AF357355	63	0.162784	20	0.0479368	33	0.103008	38.6667	0.104576	1	0.442638	0.644195	0.231921	-0.0119682	57.9159	0.904449	4	0.0072883	2	0.00492191	1	0.0022479	2.33333	0.00481937	1	0.28114	-0.0305406	1.05119	N/A	N/A	N/A
ENSMUSG00000051378	kinesin family member 18B; RIKEN cDNA 3000004C01 gene	NM_197959	Kif18b	934	0.0461606	872	0.0390486	882	0.0521886	896	0.0457993	1	0.734007	0.355592	0.275382	-0.0119612	57.9496	0.956239	2215	0.0828814	1414	0.0676638	1570	0.0732474	1733	0.0745975	1	0.710274	0.502707	0.321752	-0.00992619	69.8302	0.992682
ENSMUSG00000005958	Eph receptor B3	NM_010143	Ephb3	1511	0.0210434	2006	0.0257207	1691	0.028309	1736	0.0250243	1	0.797844	0.35636	0.269414	-0.0119611	57.9501	0.953553	2440	0.0256544	1413	0.0189981	1835	0.0240558	1896	0.0229028	1	0.670835	0.615233	0.35911	-0.00867817	79.8725	0.985592
ENSMUSG00000079014	ENSMUSG00000079014	NM_001199940		24	0.00134243	25	0.000464181	29	0.001564	26	0.00112354	1	0.805651	1.48086	0.131918	-0.0119574	57.9681	0.627888	1057	0.0505159	892	0.0544641	997	0.0593835	982	0.0547878	1	0.699459	0.719402	0.517862	-0.00579096	119.695	0.947045
ENSMUSG00000040795	similar to Iqcc protein; IQ motif containing C	NM_198026	Iqcc	244	0.00950958	197	0.0070122	207	0.00969044	216	0.00873741	1	0.549037	0.435073	0.268091	-0.011952	57.994	0.969399	289	0.00848568	208	0.00782118	215	0.00787769	237.333	0.00806152	1	0.566705	0.675551	0.436707	-0.0074069	93.5813	0.891742
ENSMUSG00000014767	TATA box binding protein	NM_013684	Tbp	1648	0.0128982	844	0.00599701	1178	0.0110699	1223.33	0.00998838	1	0.52344	0.434304	0.271743	-0.0119475	58.0159	0.959354	1624	0.009564	1125	0.00849226	1206	0.00886876	1318.33	0.00897501	1	0.760877	0.53409	0.451406	-0.00747495	92.7293	0.959426
ENSMUSG00000059824	D site albumin promoter binding protein	NM_016974	Dbp	80	0.00241468	96	0.00262642	84	0.0030278	86.6667	0.00268963	1	0.824393	0.462564	0.235118	-0.0119456	58.0254	0.988834	221	0.00505691	159	0.00465172	184	0.00524948	188	0.00498604	1	0.85754	0.802847	0.331056	-0.00795992	87.0797	0.925502
ENSMUSG00000033054	nuclear protein in the AT region	NM_001081152	Npat	2107	0.0584353	1209	0.0305301	1683	0.0560078	1666.33	0.0483244	1	0.58323	0.47284	0.253613	-0.0119444	58.0312	0.986277	2489	0.052005	1464	0.0391781	1946	0.0507498	1966.33	0.047311	1	0.719984	0.567732	0.30881	-0.00977913	70.8803	0.99908
ENSMUSG00000047330	potassium voltage-gated channel, Isk-related subfamily, gene 4	NM_021342	Kcne4	1813	0.135225	1288	0.0892675	1614	0.145437	1571.67	0.12331	1	0.718107	0.507756	0.232389	-0.0119429	58.0385	0.998914	16	0.000482561	3	0.000114918	9	0.000377487	9.33333	0.000324988	1	0.449897	1.23755	0.328154	-0.00766595	90.419	0.57698
ENSMUSG00000046694	family with sequence similarity 46, member B	NM_175307	Fam46b	13	0.00102367	17	0.0011754	9	0.000808782	13	0.00100262	1	0.721141	0.305456	0.299903	-0.0119302	58.1003	0.90766	94	0.00568509	65	0.00502355	77	0.00580548	78.6667	0.00550471	1	1.0331	0.355135	0.220424	-0.0128361	53.9998	0.926926
ENSMUSG00000045281	G protein-coupled receptor 20	NM_173365	Gpr20	29	0.0024681	33	0.00257026	20	0.00201456	27.3333	0.00235097	1	0.626122	0.319436	0.303825	-0.0119299	58.1018	0.914691	70	0.00451111	37	0.00304837	62	0.00498432	56.3333	0.00418127	1	0.919621	0.682201	0.209226	-0.0112794	61.4524	0.924671
ENSMUSG00000027335	adrenergic receptor, alpha 1d	NM_013460	Adra1d	11	0.00106397	19	0.00170773	12	0.0014023	14	0.00139133	1	0.712998	0.612197	0.212623	-0.0119248	58.1265	0.976507	0	-3.27925e-06	0	-1.92264e-06	0	-2.43901e-06	0	-2.54696e-06	1	0.735984	-32.3155	0.311013	N/A	N/A	N/A
ENSMUSG00000056824	predicted gene 1008	NM_001005425	Zfp663	19	0.00043399	22	0.00046655	15	0.000413705	18.6667	0.000438082	1	0.825577	0.222864	0.340392	-0.0119122	58.1879	0.776994	0	-1.3376e-06	1	2.14645e-05	1	2.07321e-05	0.666667	1.36197e-05	1	0.852192	-0.0235799	-0.017281	N/A	N/A	N/A
ENSMUSG00000051498	toll-like receptor 6	NM_011604	Tlr6	85	0.00599609	52	0.00340497	64	0.00545171	67	0.00495093	1	0.686812	0.495131	0.239141	-0.0119117	58.1904	0.999822	1	3.46809e-05	3	0.000199908	4	0.000255526	2.66667	0.000163371	1	3.20865	-0.0410515	1.02271	N/A	N/A	N/A
ENSMUSG00000062939	signal transducer and activator of transcription 4	NM_011487	Stat4	43	0.00141032	25	0.000757445	52	0.00205762	40	0.00140846	1	0.851058	0.787874	0.179977	-0.0119013	58.2414	0.885306	4	9.45432e-05	8	0.000251811	10	0.000304523	7.33333	0.000216959	1	0.877329	0.622252	0.401054	-0.00751482	92.2374	0.991051
ENSMUSG00000049606	zinc finger protein 644	NM_026856	Zfp644	3002	0.0161314	1610	0.00787013	2430	0.0156793	2347.33	0.0132269	1	0.518215	0.430667	0.27564	-0.0118998	58.2488	0.954994	3352	0.0135647	2010	0.0104204	2564	0.012951	2642	0.012312	1	0.718209	0.629255	0.506154	-0.00631919	109.689	0.958039
ENSMUSG00000085178				11	0.00240207	7	0.00140081	7	0.00181528	8.33333	0.00187272	1	0.235717	0.353786	0.370498	-0.0118966	58.2642	0.643952	11	0.00180763	6	0.00126317	16	0.00328699	11	0.00211927	1	0.639712	0.600412	0.186903	-0.0129773	53.4124	0.972573
ENSMUSG00000051650	UDP-GlcNAc:betaGal beta-1,3-N-acetylglucosaminyltransferase 2	NM_001169114,NM_016888	B3gnt2	18	0.000522821	11	0.000287861	8	0.000274747	12.3333	0.00036181	1	0.236587	0.455546	0.326234	-0.0118961	58.267	0.677015	31	0.000680077	20	0.000561519	24	0.000657237	25	0.000632945	1	0.945077	0.829509	0.124573	-0.0139076	49.8395	0.835303
ENSMUSG00000046589	similar to Leucine rich repeat containing 8 family, member E; leucine rich repeat containing 8 family, member E	NM_028175	Lrrc8e	4	0.000182422	13	0.000545824	5	0.000272239	7.33333	0.000333495	1	0.194263	0.191086	0.529187	-0.0118957	58.2689	0.458824	55	0.00196202	31	0.00141253	28	0.00124469	38	0.00153975	1	0.553117	0.675246	0.392175	-0.00812974	85.2607	0.904483
ENSMUSG00000048439	nucleoporin like 2	NM_153092	Nupl2	336	0.0107859	261	0.00767344	325	0.0125559	307.333	0.0103384	1	0.733646	0.483084	0.238988	-0.0118893	58.3003	0.999092	349	0.00843293	233	0.00721205	250	0.00753612	277.333	0.00772703	1	0.565732	0.431768	0.315469	-0.0108955	63.618	0.950345
ENSMUSG00000028182	leucine-rich repeats and IQ motif containing 3	NM_028938	Lrriq3	8	0.000553363	8	0.000507612	13	0.00108644	9.66667	0.000715807	1	0.649688	0.774003	0.19472	-0.0118863	58.3146	0.911752	12	0.000626332	7	0.000467447	6	0.000389453	8.33333	0.000494411	1	1.07345	1.33819	1.67108	0.00429745	>Capzb	0.987286
ENSMUSG00000024293	predicted gene 7054; establishment of cohesion 1 homolog 1 (S. cerevisiae)	NM_001081222	Esco1	847	0.0117427	472	0.00589508	642	0.0106799	653.667	0.00943921	1	0.513023	0.512368	0.254058	-0.011882	58.3361	0.963266	1119	0.0116962	835	0.0111776	771	0.0100557	908.333	0.0109765	1	0.796399	0.674285	0.806443	-0.00297833	232.73	0.661553
ENSMUSG00000024427	sprouty homolog 4 (Drosophila)	NM_011898	Spry4	656	0.0262419	668	0.0248124	665	0.0321059	663	0.0277201	1	0.641613	0.219183	0.367473	-0.0118792	58.3497	0.761367	97	0.00284441	40	0.00151312	111	0.00411595	82.6667	0.00282449	1	0.440084	0.680956	0.211557	-0.0123847	55.9682	0.896387
ENSMUSG00000027534	sorting nexin 16	NM_001127191,NM_029068	Snx16	482	0.0170759	268	0.00870592	381	0.0162363	377	0.014006	1	0.579592	0.397714	0.279854	-0.0118785	58.3533	0.962936	356	0.00947051	212	0.00723501	280	0.00930625	282.667	0.00867059	1	0.64102	0.440935	0.428042	-0.00869293	79.7369	0.899216
ENSMUSG00000041707	RIKEN cDNA 1810011H11 gene	NM_001163616	1810011H11Rik	32	0.0039997	22	0.00255522	25	0.00377521	26.3333	0.00344338	1	0.408489	0.501006	0.272157	-0.0118779	58.3561	0.896964	0	-1.23274e-05	0	-2.87679e-06	0	-6.56619e-06	0	-7.2568e-06	1	0.421657	2.16615	0.398097	-0.00476492	145.469	0.195804
ENSMUSG00000068869	ENSMUSG00000068869			110	0.0173849	80	0.0116136	127	0.0241922	105.667	0.0177302	1	0.403258	0.448747	0.288542	-0.0118769	58.361	0.885226	70	0.00829767	55	0.00836949	60	0.00887879	61.6667	0.00851531	1	0.56919	0.430776	0.416069	-0.00913571	75.8723	0.878398
ENSMUSG00000044991	RIKEN cDNA 1110034G24 gene	NM_028637	1110034G24Rik	266	0.0122522	170	0.00715129	192	0.0106218	209.333	0.0100084	1	0.545571	0.519242	0.248984	-0.0118701	58.3944	0.97553	238	0.0082433	173	0.00768177	184	0.00796017	198.333	0.00796174	1	0.78747	0.620037	0.390831	-0.00786159	88.1688	0.999945
ENSMUSG00000048371	RIKEN cDNA 4833426J09 gene	NM_001024606	Pdp2	190	0.0099511	171	0.00811439	191	0.011958	184	0.0100078	1	0.676539	0.387524	0.27353	-0.0118605	58.4417	0.973209	412	0.0163255	273	0.0138363	362	0.0178891	349	0.016017	1	0.707032	0.652459	0.446956	-0.00701885	98.7552	0.979045
ENSMUSG00000020561	predicted gene 8670; TWIST neighbor	NM_172253	Twistnb	835	0.0658923	539	0.0389269	696	0.0660612	690	0.0569601	1	0.62099	0.552872	0.234005	-0.0118593	58.4476	0.989001	693	0.0411	486	0.03696	538	0.0398458	572.333	0.0393019	1	0.716116	0.589039	0.406692	-0.0079226	87.4899	0.987703
ENSMUSG00000047832	cell division cycle associated 4	NM_028023	Cdca4	2126	0.160705	1762	0.120518	1745	0.15786	1877.67	0.146361	1	0.696698	0.45961	0.249564	-0.0118545	58.4714	0.997898	4041	0.230875	2864	0.20935	2933	0.209008	3279.33	0.216411	1	0.691539	0.551574	0.323403	-0.00964162	71.8912	0.995807
ENSMUSG00000092344				2	0.00132783	0	-1.18594e-05	2	0.00159946	1.33333	0.000971809	1	0.865504	0.141837	0.42557	-0.0118538	58.4746	0.58172	1	0.000496896	1	0.000640026	1	0.000621571	1	0.000586164	1	3.53107	0.721882	1.00032	0.000969965	>Capzb	0.0104731
ENSMUSG00000015839	nuclear factor, erythroid derived 2, like 2	NM_010902	Nfe2l2	1165	0.0544246	878	0.0375072	907	0.0509047	983.333	0.0476122	1	0.668599	0.464016	0.251017	-0.0118527	58.4803	0.99736	1401	0.0493138	874	0.0393924	928	0.040758	1067.67	0.0431547	1	0.777686	0.627902	0.504996	-0.00621428	111.541	0.977642
ENSMUSG00000044068	zinc finger (CCCH type), RNA binding motif and serine/arginine rich 1	NM_011663	Zrsr1	176	0.00715447	117	0.00425975	135	0.0065638	142.667	0.00599268	1	0.491783	0.41613	0.286247	-0.0118521	58.483	0.935773	331	0.0101691	250	0.0098284	235	0.00900562	272	0.0096677	1	0.767497	0.487354	0.293056	-0.0104948	66.0469	0.994515
ENSMUSG00000041695	potassium inwardly-rectifying channel, subfamily J, member 2	NM_008425	Kcnj2	443	0.0149355	250	0.00783213	410	0.0166986	367.667	0.0131554	1	0.511458	0.374716	0.298707	-0.0118521	58.483	0.924085	11	0.00023346	1	2.36415e-05	8	0.000224277	6.66667	0.00016046	1	0.277858	5.34252	0.930378	0.00282872	>Capzb	0.0339599
ENSMUSG00000054901	predicted gene 941	NM_001145452	Arhgef33	10	0.000565207	5	0.000255892	6	0.000406731	7	0.000409277	1	0.696194	1.50741	0.137908	-0.0118508	58.4893	0.628311	5	0.00021151	7	0.000381114	6	0.000318209	6	0.000303611	1	0.937662	0.511095	1.66764	0.00101408	>Capzb	0.0271379
ENSMUSG00000026098	postmeiotic segregation increased 1 (S. cerevisiae)	NM_153556	Pms1	676	0.0118244	412	0.00652333	483	0.0101215	523.667	0.00948973	1	0.570208	0.468119	0.260142	-0.0118507	58.4901	0.981313	887	0.0116968	629	0.010622	666	0.0109616	727.333	0.0110935	1	0.785341	0.584317	0.430422	-0.00744162	93.1447	0.989519
ENSMUSG00000004508	growth factor receptor bound protein 2-associated protein 2	NM_001162477,NM_010248	Gab2	377	0.0115484	425	0.0120827	362	0.0133884	388	0.0123399	1	0.811163	0.346207	0.277398	-0.0118411	58.5372	0.94199	69	0.001558	38	0.00110757	48	0.00135828	51.6667	0.00134128	1	0.778582	0.520063	0.373951	-0.00871811	79.5065	0.985507
ENSMUSG00000039911	splA/ryanodine receptor domain and SOCS box containing 1	NM_029035	Spsb1	50	0.00100306	93	0.0016967	69	0.00165557	70.6667	0.00145177	1	1.14857	0.270076	0.287936	-0.0118407	58.5393	0.807168	333	0.00512268	188	0.00369496	222	0.00425576	247.667	0.0043578	1	0.825346	0.494988	0.364328	-0.00894794	77.4644	0.97574
ENSMUSG00000086370				484	0.00607903	233	0.00268446	382	0.00577335	366.333	0.00484561	1	0.314401	0.339847	0.35495	-0.0118392	58.5466	0.740718	257	0.00241725	173	0.0020918	241	0.00283678	223.667	0.00244861	1	0.529599	0.495151	0.5138	-0.00746842	92.8104	0.785806
ENSMUSG00000033368	tripartite motif-containing 69	NM_080510	Trim69	3	0.000155696	1	4.83559e-05	5	0.000314351	3	0.000172801	1	2.03409	0.604172	0.167081	-0.0118331	58.5769	0.668357	3	0.000117166	0	-5.44413e-08	0	-5.46748e-07	1	3.88549e-05	1	1.16603	-1990.24	-446.074	N/A	N/A	N/A
ENSMUSG00000041000	tripartite motif-containing 62	NM_178110	Trim62	90	0.00251623	145	0.00366628	111	0.00368939	115.333	0.00329063	1	1.04134	0.302361	0.279236	-0.0118326	58.5793	0.864835	511	0.0109248	314	0.00857797	399	0.010632	408	0.0100449	1	0.88125	0.712402	0.483093	-0.00589655	117.551	0.995211
ENSMUSG00000039763	DnaJ (Hsp40) homolog, subfamily C, member 28	NM_001099738,NM_138664	Dnajc28	76	0.0020535	65	0.00157692	67	0.00215872	69.3333	0.00192971	1	0.765585	0.378764	0.269433	-0.0118326	58.5795	0.967975	162	0.00331124	133	0.00347773	145	0.00369687	146.667	0.00349528	1	0.816049	0.455324	0.330517	-0.00984946	70.3741	0.972199
ENSMUSG00000082107	ENSMUSG00000082107			16	0.00263953	5	0.000744441	14	0.00277532	11.6667	0.0020531	1	0.271096	0.502025	0.303401	-0.0118322	58.5814	0.73477	12	0.00148671	8	0.00127227	12	0.00185811	10.6667	0.00153903	1	0.58659	0.54034	1.00007	-0.00280039	247.518	0.223402
ENSMUSG00000055333	FAT tumor suppressor homolog 2 (Drosophila)	NM_001029988	Fat2	8	-3.3178e-05	52	-4.57837e-05	9	-0.000121599	23	-6.68536e-05	1	1.3532	0.729733	0.168369	-0.0118319	58.5831	0.786324	4933	0.0235989	3113	0.0190248	2885	0.0172002	3643.67	0.0199413	1	0.791121	0.951697	0.891665	-0.00125711	551.382	0.423677
ENSMUSG00000091515				75	0.0317459	44	0.0170933	49	0.0248481	56	0.0245624	1	0.393059	0.350895	0.330909	-0.0118285	58.5996	0.828495	96	0.0306294	36	0.0147011	67	0.0266825	66.3333	0.0240043	1	0.646617	0.821236	0.671026	-0.00385029	180.025	0.72205
ENSMUSG00000034117	G protein-coupled receptor 44	NM_009962	Gpr44	15	0.00104177	16	0.00103048	13	0.00109119	14.6667	0.00105448	1	0.348386	0.383122	0.326647	-0.0118234	58.625	0.804488	2	0.000101502	2	0.00013261	0	-1.89791e-06	1.33333	7.74046e-05	1	0.592047	1.07781	-68.1866	N/A	N/A	N/A
ENSMUSG00000087623				9	0.000994825	8	0.000821213	13	0.00173458	10	0.00118354	1	0.969476	0.229157	0.32705	-0.0118226	58.6288	0.77225	6	0.00049762	1	0.00010568	4	0.000412967	3.66667	0.000338756	1	0.190009	2.17593	1.00243	-0.00015246	4546.42	0.000130658
ENSMUSG00000051986	RIKEN cDNA A530006G24 gene		A530006G24Rik	6	0.000829004	5	0.000641954	11	0.00183621	7.33333	0.00110239	1	0.435721	0.244936	0.386586	-0.0118188	58.6477	0.739016	0	-2.55507e-06	0	-7.22741e-07	0	-3.1937e-06	0	-2.15717e-06	1	0.449768	1.05901	0.565479	-0.00470586	147.295	0.432951
ENSMUSG00000047878	alpha 1,4-galactosyltransferase	NM_001004150,NM_001170954	A4galt	46	0.00200484	46	0.0018622	27	0.0014217	39.6667	0.00176291	1	0.871442	0.532693	0.220497	-0.011817	58.6568	0.977002	0	-6.17909e-06	1	3.98615e-05	0	-2.47276e-06	0.333333	1.04032e-05	1	0.899536	-0.121136	0.322532	N/A	N/A	N/A
ENSMUSG00000022760	THAP domain containing 7	NM_026909	Thap7	254	0.00821748	307	0.00910911	236	0.00914964	265.667	0.00882541	1	0.664108	0.381898	0.279709	-0.0117945	58.7687	0.967598	376	0.00917817	271	0.00846388	330	0.0100507	325.667	0.0092309	1	0.687598	0.464726	0.272138	-0.0112904	61.3926	0.995029
ENSMUSG00000049287	RIKEN cDNA A230051G13 gene	NM_173785	Iba57	98	0.00322131	141	0.00421325	118	0.00463809	119	0.00402422	1	1.12848	0.422142	0.23308	-0.0117928	58.7773	0.912836	328	0.00818846	224	0.00714785	262	0.00815321	271.333	0.00782984	1	0.809185	0.550236	0.301075	-0.00985417	70.3405	0.995986
ENSMUSG00000056755	glutamate receptor, metabotropic 7	NM_177328	Grm7	2	2.98303e-05	3	4.15793e-05	2	3.60397e-05	2.33333	3.58165e-05	1	0.435721	0.204114	0.425245	-0.0117925	58.7787	0.665979	0	-9.19397e-08	0	-4.68119e-08	0	-6.26836e-08	0	-6.71451e-08	1	0.449768	0.882506	0.622027	-0.00467951	148.124	0.470589
ENSMUSG00000033983	RIKEN cDNA 2210409E12 gene; coilin	NM_016706	Coil	682	0.0156438	608	0.012758	605	0.0166752	631.667	0.0150257	1	0.584006	0.384932	0.288065	-0.0117865	58.8086	0.954889	737	0.0127285	583	0.0128973	584	0.0125883	634.667	0.012738	1	0.665315	0.508863	0.379521	-0.0089429	77.5081	0.968241
ENSMUSG00000063234	G protein-coupled receptor 84	NM_030720	Gpr84	6	0.000710869	5	0.000546491	6	0.000856759	5.66667	0.000704706	1	0.431971	0.483236	0.277253	-0.011786	58.8109	0.911878	1	8.71326e-05	2	0.000227606	2	0.000221147	1.66667	0.000178629	1	5.98507	6.87079	7.0348	0.0213449	>Capzb	0.803127
ENSMUSG00000047084	neugrin, neurite outgrowth associated	NM_031375	Ngrn	719	0.0434803	571	0.0313687	626	0.0454148	638.667	0.0400879	1	0.650897	0.439832	0.262358	-0.0117846	58.818	0.990711	1164	0.0531429	792	0.0462744	824	0.0469229	926.667	0.0487801	1	0.60989	0.569565	0.369616	-0.00889112	77.9594	0.962715
ENSMUSG00000026942	TNF receptor-associated factor 2	NM_009422	Traf2	799	0.0157377	689	0.0123876	741	0.0175178	743	0.0152144	1	0.731352	0.389009	0.271124	-0.0117808	58.8372	0.974103	1105	0.0164143	766	0.0145652	881	0.0163272	917.333	0.0157689	1	0.766518	0.556829	0.383105	-0.0083725	82.7886	0.99312
ENSMUSG00000031681	MAD homolog 1 (Drosophila)	NM_008539	Smad1	1188	0.0252431	1184	0.0230723	1180	0.03015	1184	0.0261551	1	0.812878	0.352694	0.277338	-0.0117803	58.8397	0.945553	1658	0.0265706	1034	0.0212049	1153	0.0230426	1281.67	0.023606	1	0.777362	0.544752	0.354125	-0.00891924	77.7137	0.995691
ENSMUSG00000037029	similar to zinc finger protein 146; zinc finger protein 146	NM_011980	Zfp146	4267	0.303647	2409	0.156274	2905	0.248268	3193.67	0.236063	1	0.574656	0.53195	0.246333	-0.0117789	58.8467	0.982721	3976	0.212817	2690	0.184572	2847	0.190314	3171	0.195901	1	0.772243	0.669881	0.366917	-0.00804801	86.1265	0.993178
ENSMUSG00000071645	terminal uridylyl transferase 1, U6 snRNA-specific	NM_197993	Tut1	437	0.0290639	586	0.0355773	490	0.0389855	504.333	0.0345422	1	0.703475	0.349676	0.28898	-0.0117759	58.8616	0.946563	1233	0.0621786	765	0.0493143	985	0.0619251	994.333	0.057806	1	0.681156	0.583359	0.397398	-0.00817958	84.7411	0.980633
ENSMUSG00000035239	neuraminidase 3	NM_016720	Neu3	59	0.00323123	42	0.00210023	58	0.00380951	53	0.00304699	1	0.469321	0.310627	0.339276	-0.0117755	58.8635	0.843319	81	0.00334537	46	0.00243191	74	0.00381356	67	0.00319695	1	0.911143	0.501363	0.445248	-0.00747683	92.706	0.92679
ENSMUSG00000049323	Smith-Magenis syndrome chromosome region, candidate 8 homolog (human)	NM_175491,NM_001085440	Smcr8	871	0.0145654	853	0.0130608	853	0.0171264	859	0.0149175	1	0.678834	0.33283	0.298922	-0.0117745	58.8686	0.929644	1224	0.0154382	816	0.0131718	987	0.0155297	1009	0.0147132	1	0.715902	0.571409	0.337746	-0.00919898	75.3505	0.997635
ENSMUSG00000073062	zinc finger, X-linked, duplicated B	NM_001081473	Zxdb	77	0.00249836	216	0.0063383	85	0.00329591	126	0.00404419	1	1.20869	0.415076	0.231749	-0.0117737	58.8723	0.88907	168	0.00412425	365	0.0114612	164	0.00502107	232.333	0.00686884	1	1.05807	0.592582	0.383672	-0.00765389	90.5614	0.926764
ENSMUSG00000046541	zinc finger protein 526	NM_175436	Zfp526	185	0.0100557	202	0.00999474	195	0.0126589	194	0.0109031	1	0.573069	0.303042	0.326941	-0.0117721	58.8806	0.877397	505	0.0208069	290	0.0152757	423	0.0217303	406	0.019271	1	0.525751	0.439958	0.292555	-0.0114309	60.6379	0.950496
ENSMUSG00000055228	RIKEN cDNA 8430426H19 gene	NM_178875	Zfp935	256	0.0443068	141	0.0222496	198	0.041167	198.333	0.0359078	1	0.526395	0.459529	0.271498	-0.0117651	58.9155	0.96312	195	0.0253485	153	0.0255198	177	0.0287572	175	0.0265418	1	0.751011	0.413659	0.445838	-0.00838565	82.6588	0.877995
ENSMUSG00000039910	Cbp/p300-interacting transactivator, with Glu/Asp-rich carboxy-terminal domain, 2	NM_010828	Cited2	225	0.0208533	296	0.0251031	221	0.0245473	247.333	0.0235012	1	0.705323	0.449923	0.255084	-0.0117637	58.9228	0.995924	583	0.0409393	341	0.0306103	383	0.0335275	435.667	0.0350257	1	0.796723	1.10428	0.519057	-0.00420925	164.672	0.681346
ENSMUSG00000006191	CDK5 regulatory subunit associated protein 1-like 1	NM_144536	Cdkal1	718	0.00650618	337	0.00278253	430	0.00467809	495	0.0046556	1	0.434409	0.504484	0.272005	-0.0117618	58.9319	0.914732	528	0.0035926	375	0.00327468	410	0.00348792	437.667	0.00345173	1	0.730501	0.556705	0.416546	-0.00791825	87.538	0.980451
ENSMUSG00000022340	RIKEN cDNA 5730410E15 gene	NM_001032727,NM_176998,NM_178765	Sybu	47	0.00093225	35	0.000644862	42	0.00100624	41.3333	0.000861119	1	0.834402	0.542579	0.222839	-0.0117605	58.9386	0.982526	3	4.19768e-05	1	1.83726e-05	2	3.55125e-05	2	3.1954e-05	1	0.357683	0.65771	-0.016064	N/A	N/A	N/A
ENSMUSG00000029726	methylphosphate capping enzyme	NM_144913	Mepce	611	0.0271118	717	0.0289393	676	0.0358508	668	0.030634	1	0.638991	0.317861	0.311294	-0.0117591	58.9457	0.908649	1824	0.061401	1082	0.0465614	1464	0.061439	1456.67	0.0564671	1	0.657391	0.838933	0.420837	-0.00671867	103.167	0.892506
ENSMUSG00000032712	RIKEN cDNA 2810474O19 gene	NM_026054	2810474O19Rik	1351	0.0167585	812	0.00921726	1140	0.0170092	1101	0.0143283	1	0.579154	0.380886	0.291684	-0.011754	58.9711	0.950182	1224	0.011418	745	0.00890799	905	0.0105391	958	0.0102883	1	0.760556	0.613126	0.528844	-0.00603226	114.907	0.955103
ENSMUSG00000048756	forkhead box O3	NM_019740	Foxo3	559	0.00722638	713	0.00840054	680	0.0105551	650.667	0.00872734	1	0.890261	0.37025	0.265919	-0.0117486	58.998	0.946865	1596	0.0156457	992	0.0124315	1086	0.0132682	1224.67	0.0137818	1	0.715102	0.555901	0.340167	-0.00924276	74.9935	0.996678
ENSMUSG00000039701	ubiquitin specific peptidase 53	NM_133857	Usp53	158	0.00719608	115	0.00470301	155	0.00846257	142.667	0.00678722	1	0.684162	0.487205	0.247758	-0.0117443	59.0199	0.999561	449	0.0155067	246	0.0108637	276	0.0118814	323.667	0.0127506	1	0.912197	0.829839	0.550204	-0.00453145	152.964	0.969741
ENSMUSG00000043157	ADP-ribosylation factor-like 11	NM_177337	Arl11	37	0.00458716	23	0.00264971	17	0.00254504	25.6667	0.00326063	1	0.353287	0.665469	0.250093	-0.0117439	59.0217	0.822501	0	-1.4138e-05	0	-2.98316e-06	1	0.000112007	0.333333	3.16285e-05	1	0.364677	-26.0047	1.02364	N/A	N/A	N/A
ENSMUSG00000075232	S-adenosylmethionine decarboxylase, pseudogene 7; S-adenosylmethionine decarboxylase, pseudogene 6; S-adenosylmethionine decarboxylase 2; S-adenosylmethionine decarboxylase, pseudogene 4; S-adenosylmethionine decarboxylase 1; S-adenosylmethionine decarboxylase, pseudogene 3; similar to S-adenosylmethionine decarboxylase proenzyme 2 (AdoMetDC 2) (SamDC 2)	NM_009665	Amd1	1981	0.113329	828	0.042958	1421	0.0975143	1410	0.0846005	1	0.540544	0.471764	0.267088	-0.0117436	59.0236	0.970507	2153	0.0927406	1160	0.064025	1653	0.0889008	1655.33	0.0818888	1	0.780548	0.732722	0.719545	-0.00347029	199.738	0.854301
ENSMUSG00000003208	coiled-coil domain containing 94	NM_028381	Ccdc94	310	0.0435204	388	0.0499374	244	0.041059	314	0.0448389	1	0.769508	0.468415	0.245522	-0.0117401	59.0408	0.995768	353	0.0373258	332	0.044952	309	0.0407937	331.333	0.0410238	1	0.668979	0.522141	0.300457	-0.0103356	67.0639	0.994697
ENSMUSG00000066798	RIKEN cDNA A930039A15 gene; zinc finger and BTB domain containing 6	NM_146253	Zbtb6	643	0.0122394	285	0.00491434	614	0.0140318	514	0.0103952	1	0.517438	0.432406	0.282369	-0.0117362	59.0606	0.95146	809	0.0116062	422	0.00775377	685	0.0122625	638.667	0.0105408	1	0.66415	0.563576	0.454935	-0.00747073	92.7818	0.944651
ENSMUSG00000056656	apolipoprotein L 8	NM_001081970	Apol8	2	8.45434e-05	4	0.000156789	5	0.0002556	3.66667	0.000165644	1	2.18209	0.148351	0.336552	-0.0117334	59.0745	0.478677	2	6.36215e-05	1	4.06282e-05	1	3.93617e-05	1.33333	4.78705e-05	1	0.578091	5.79738	7.06382	0.0171218	>Capzb	0.768384
ENSMUSG00000058291	zinc finger protein 68	NM_001044747,NM_001163797,NM_013844	Zfp68	2569	0.0483316	1269	0.0218889	1797	0.0407085	1878.33	0.0369763	1	0.470806	0.404618	0.299073	-0.0117321	59.0814	0.914973	1469	0.0207098	982	0.0177885	1016	0.0179081	1155.67	0.0188021	1	0.764095	0.649056	0.6012	-0.00502991	137.805	0.92288
ENSMUSG00000027014	CWC22 spliceosome-associated protein homolog (S. cerevisiae)	NM_030560,NM_172667	Cwc22	638	0.00465857	958	0.00637254	575	0.00504158	723.667	0.00535756	1	0.741311	0.491953	0.242234	-0.0117293	59.0952	0.998886	983	0.0054171	1182	0.00833619	681	0.00468058	948.667	0.00614462	1	0.769989	0.627153	0.372505	-0.00816592	84.8829	0.999307
ENSMUSG00000049097	ankyrin repeat domain 34A	NM_001024851	Ankrd34a	50	0.00355418	35	0.00230959	32	0.00274772	39	0.0028705	1	0.487776	0.350215	0.318831	-0.0117281	59.1015	0.889416	2	9.61924e-05	2	0.00013428	1	6.19863e-05	1.66667	9.74861e-05	1	1.89725	0.33861	2.1153	0.00233552	>Capzb	0.048082
ENSMUSG00000087271				28	0.00379481	27	0.00336635	37	0.00604574	30.6667	0.0044023	1	0.902608	0.778795	0.183353	-0.0117267	59.1083	0.880866	22	0.00223997	17	0.00221896	18	0.0022854	19	0.00224811	1	0.58311	0.717366	0.890524	-0.00264682	261.879	0.319277
ENSMUSG00000043556	F-box and leucine-rich repeat protein 7	NM_176959	Fbxl7	233	0.0290156	340	0.0392624	295	0.0443317	289.333	0.0375366	1	0.908381	0.370134	0.265589	-0.0117255	59.1143	0.94327	84	0.00780114	54	0.00643593	73	0.00846872	70.3333	0.0075686	1	0.918948	0.32551	0.286356	-0.011637	59.564	0.904193
ENSMUSG00000032643	four and a half LIM domains 3	NM_010213	Fhl3	565	0.027651	580	0.0263355	604	0.0356753	583	0.0298872	1	0.706182	0.380625	0.279046	-0.0117227	59.1288	0.967967	125	0.00452756	65	0.00303462	115	0.0052267	101.667	0.00426296	1	0.720465	0.623143	0.372989	-0.00828356	83.6775	0.994681
ENSMUSG00000074909	RAN binding protein 6	NM_177721	Ranbp6	1015	0.0382065	551	0.0190586	801	0.0362898	789	0.031185	1	0.487622	0.456163	0.279719	-0.0117205	59.1399	0.942423	662	0.0186937	369	0.0133738	513	0.0181039	514.667	0.0167238	1	0.665456	0.794338	0.555304	-0.00511228	135.585	0.874389
ENSMUSG00000011118	pannexin 3	NM_172454	Panx3	11	0.000648361	8	0.00043817	7	0.000498478	8.66667	0.000528337	1	0.475332	0.612341	0.242997	-0.0117198	59.1431	0.928768	0	-1.99831e-06	0	-4.93312e-07	0	-8.66999e-07	0	-1.11954e-06	1	0.490656	2.64752	0.355444	-0.00460686	150.46	0.158867
ENSMUSG00000094626		NM_033567		19	0.000714234	20	0.00068773	19	0.00085385	19.3333	0.000751938	1	0.54662	0.339438	0.315261	-0.011718	59.1523	0.905904	19	0.000537483	19	0.000688673	29	0.00102508	22.3333	0.000750412	1	1.29597	0.987302	0.482129	-0.00426107	162.67	0.572308
ENSMUSG00000021125	arginase type II	NM_009705	Arg2	3	0.000381064	4	0.000454934	7	0.00107531	4.66667	0.000637102	1	0.857612	0.462574	0.241692	-0.0117077	59.2042	0.983308	19	0.00184895	11	0.00136785	13	0.00157572	14.3333	0.00159751	1	1.10841	2.03441	0.922489	0.00190576	>Capzb	0.131626
ENSMUSG00000083064	predicted gene 7785			366	0.0752224	7	0.00133218	264	0.0652437	212.333	0.0472661	1	0.532274	0.349101	0.313479	-0.0117071	59.2074	0.908632	270	0.041669	2	0.000395006	205	0.039534	159	0.0271993	1	0.711467	2.53046	0.472564	-0.00235231	294.667	0.0679231
ENSMUSG00000064016	predicted gene 648	NM_001033372	Gm648	2	0.000354563	4	0.000649461	2	0.000426523	2.66667	0.000476849	1	0.861978	0.15325	0.419509	-0.0117057	59.2146	0.602986	0	-1.09279e-06	3	0.000511279	1	0.000165752	1.33333	0.000225313	1	-571.174	0.721969	5.01276	N/A	N/A	N/A
ENSMUSG00000038957	enhancer of mRNA decapping 3 homolog (S. cerevisiae)	NM_153799	Edc3	1360	0.0238726	1187	0.0190354	1196	0.0252157	1247.67	0.0227079	1	0.714073	0.397365	0.273208	-0.0117026	59.23	0.97722	2040	0.0270205	1286	0.0217981	1366	0.022566	1564	0.0237949	1	0.641432	0.471425	0.325911	-0.0102104	67.8863	0.97562
ENSMUSG00000034780	UDP-Gal:betaGlcNAc beta 1,3-galactosyltransferase, polypeptide 1	NM_020283	B3galt1	157	0.00367957	89	0.00193828	123	0.00348278	123	0.00303354	1	0.632707	0.509137	0.248875	-0.0117001	59.243	0.99527	0	-1.13408e-05	0	-2.1822e-06	0	-6.05757e-06	0	-6.52684e-06	1	-2.99062	2.20131	-6.89317	N/A	N/A	N/A
ENSMUSG00000030016	zinc finger, matrin-like	NM_001166371,NM_008717	Zfml	7517	0.0915067	3900	0.0434411	5620	0.0823022	5679	0.0724167	1	0.512834	0.533353	0.256315	-0.0116989	59.2487	0.960073	5366	0.0490381	3493	0.0409652	4026	0.0459726	4295	0.0453253	1	0.715702	0.670955	0.47109	-0.00657687	105.392	0.975918
ENSMUSG00000043831	LysM, putative peptidoglycan-binding, domain containing 4	NM_001191051,NM_175215	Lysmd4	495	0.0144323	361	0.00965211	426	0.0149438	427.333	0.0130094	1	0.63459	0.406612	0.278401	-0.0116974	59.2567	0.975248	417	0.00913847	289	0.00811941	316	0.00864634	340.667	0.00863474	1	0.69875	0.542912	0.394992	-0.00840578	82.4608	0.978745
ENSMUSG00000061510	ENSMUSG00000061510		Gm10101	9	0.000565548	5	0.000289288	10	0.000756414	8	0.000537083	1	0.193062	0.491724	0.341349	-0.0116886	59.3012	0.591653	8	0.000377997	3	0.000181594	7	0.000412776	6	0.000324122	1	0.29289	1.6836	0.427758	-0.0056871	121.881	0.244475
ENSMUSG00000032344	RIKEN cDNA E330016A19 gene	NM_173386	Mb21d1	171	0.00320835	164	0.00285597	189	0.00428283	174.667	0.00344905	1	0.815319	0.336387	0.288018	-0.0116859	59.315	0.929061	23	0.000315426	13	0.000231683	15	0.000256956	17	0.000268022	1	0.655559	0.542818	0.741347	-0.00451012	153.687	0.599594
ENSMUSG00000086770				7	0.00116933	5	0.000749091	12	0.00240197	8	0.00144013	1	0.868632	1.39632	0.139169	-0.0116848	59.3205	0.641863	20	0.00253351	11	0.0017818	22	0.00347387	17.6667	0.00259639	1	0.818778	1.17897	0.863248	-0.000728379	951.63	0.113036
ENSMUSG00000061298	ATP/GTP binding protein-like 4	NM_001048189,NM_030231	Agbl4	6	6.4619e-05	6	5.99885e-05	10	0.000130408	7.33333	8.50051e-05	1	0.727038	1.02384	0.170098	-0.011678	59.3547	0.795541	5	4.04717e-05	1	1.03239e-05	0	-2.26817e-07	2	1.68563e-05	1	0.231426	-0.028959	0.248811	N/A	N/A	N/A
ENSMUSG00000027829	cyclin L1	NM_019937	Ccnl1	2567	0.0197927	1521	0.0106118	2400	0.0221773	2162.67	0.0175273	1	0.558907	0.434023	0.279075	-0.0116765	59.3626	0.967283	4308	0.0250838	2426	0.0180774	3483	0.0252968	3405.67	0.0228193	1	0.501915	0.463263	0.26844	-0.0118869	58.3118	0.954858
ENSMUSG00000025576	DNA segment, Chr 11, Brigham & Women's Genetics 0517 expressed	NM_001039168,NM_001039167,NM_001024931	Rbfox3	9	0.000100302	9	9.28074e-05	17	0.000228549	11.6667	0.000140553	1	0.677788	0.340735	0.300275	-0.0116737	59.3767	0.933945	0	-3.09141e-07	2	2.13537e-05	3	3.10021e-05	1.66667	1.73489e-05	1	0.699639	1.08092	0.66866	-0.00287538	241.062	0.528574
ENSMUSG00000082655	ENSMUSG00000082655			1	0.000511211	1	0.000468431	4	0.00248381	2	0.00115448	1	0.866625	0.618774	0.209605	-0.0116719	59.386	0.956323	2	0.000773062	1	0.000494272	0	-4.32008e-06	1	0.000421005	1	1.1704	1.44245	-446.012	N/A	N/A	N/A
ENSMUSG00000028187	brix domain containing 5	NM_027332,NM_027371	Rpf1	1105	0.161222	697	0.092715	885	0.155269	895.667	0.136402	1	0.566678	0.579502	0.240917	-0.0116704	59.3936	0.972829	1180	0.129616	787	0.110756	775	0.106228	914	0.115533	1	0.639656	0.55035	0.435744	-0.00787941	87.9694	0.941465
ENSMUSG00000028545	BEN domain containing 5	NM_026279	Bend5	1107	0.0356755	998	0.0297548	863	0.0335346	989.333	0.0329883	1	0.641949	0.452084	0.264396	-0.0116702	59.3945	0.991386	401	0.00963818	280	0.00866203	296	0.00890917	325.667	0.00906979	1	0.709434	0.665354	0.483074	-0.00645794	107.333	0.96925
ENSMUSG00000055760	predicted gene 6253; gem (nuclear organelle) associated protein 6; similar to gem (nuclear organelle) associated protein 6	NM_026053	Gemin6	520	0.0529567	355	0.0327615	420	0.051327	431.667	0.0456817	1	0.485919	0.618213	0.242433	-0.0116693	59.3991	0.932447	615	0.0471852	516	0.0507137	483	0.0462533	538	0.0480507	1	0.689236	0.500663	0.270689	-0.0110841	62.5355	0.998782
[truncated: 35,999 more rows]
