# Supplementary material for: Hierarchical patterning modes orchestrate hair follicle morphogenesis
Source: PLoS Biol. 2017 Jul 11;15(7):e2002117. doi: 10.1371/journal.pbio.2002117 (PMC5507405; doi:10.1371/journal.pbio.2002117)
Supplement: S3 Data — (XLSX) [file pbio.2002117.s015.xlsx]

## Sheet: Fig 3B Cell density
Expt 1	Control				LDN				FGF9
	Area (sq. µm)	Nuclei	Density (nuclei/mm2)		Area (sq. µm)	Nuclei	Density (nuclei/mm2)		Area (sq. µm)	Nuclei	Density (nuclei/mm2)
1	27210.6	134	4924.55		33974	135	3973.63		24356	143	5871.24
2	27949.1	171	6118.27		42698	221	5175.89		33503	144	4298.12
3	35497	135	3803.14		40255	136	3378.46		55964	194	3466.51
4	27816	149	5356.63		36375	158	4343.64		23234	104	4476.2
5	23912	100	4182		34740	131	3770.87		26736	130	4862.36
			4876.92				4128.5				4594.89
Expt 2
1	27006	136	5035.92		18578	94	5059.75		21498	147	6837.85
2	23163	126	5439.71		11621	39	3355.99		25929	137	5283.66
3	25031	120	4794.06		17592	85	4831.74		27677	154	5564.19
4	29295	100	3413.55		23335	75	3214.06		32360	123	3800.99
5	25098	135	5378.91		29405	94	3196.74		36893	164	4445.29
			4812.43				3931.65				5186.39
Expt 3
1	33459	167	4991.18		24018	112	4663.17		19678	109	5539.18
2	26895	121	4498.98		29377	88	2995.54		27462	153	5571.33
3	44235	174	3933.54		49425	137	2771.88		30756	93	3023.8
4	28362	127	4477.82		46503	120	2580.48		26224	148	5643.69
5	26151	150	5735.92		22158	89	4016.61		26831	125	4658.79
			4727.49				3405.53				4887.36
Expt 4
1	25479	200	7849.6		23574	157	6659.88		20691	132	6379.59
2	19149	110	5744.43		23649	114	4820.5		30037	166	5526.52
3	19444	108	5554.41		24384	71	2911.75		26407	157	5945.39
4	13433	74	5508.82		22316	116	5198.06		15596	107	6860.73
5	14618	88	6019.98		32117	133	4141.11		20953	111	5297.57
			6135.45				4746.26				6001.96
Expt 5
1	16193	158	9757.3		21103	100	4738.66		17967	125	6957.2
2	19153	126	6578.6		16566	94	5674.27		14654	130	8871.3
3	13038	92	7056.3		19720	107	5425.96		10913	107	9804.82
4	18915	113	5974.09		15772	100	6340.35		16539	140	8464.84
5	14878	102	6855.76		15512	80	5157.3		13962	107	7663.66
			7244.41				5467.31				8352.36
			4876.92				4128.5				4594.89
			4812.43				3931.65				5186.39
			4727.49				3405.53				4887.36
			6135.45				4746.26				6001.96
			7244.41				5467.31				8352.36
mean			5559.34			5804.59	4335.85				5804.59
s.d			1105.32			1517.97	793.803				1517.97
s.e.m			494.314			678.858	354.999				678.858
	ttest						0.00272689				0.371496
							0.0203075

## Sheet: Fig 3C Condensate number
	Condensate number / mm2
Expt	Control		LDN		FGF9
1	85	29.1996	73	25.0773	0	0
2	77	26.4514	84	28.8561	7	2.40467
3	66	22.6726	73	25.0773	17	5.83992
4	65	22.3291	75	25.7643	8	2.7482
5	73	25.0773	82	28.169	0	0
mean		25.146		26.5888		2.19856
st dev		2.83694		1.7949		2.41202
s.e.m		1.26872		0.802702		1.07869
ttest from control				0.362662		0.000446705
ttest from ldn						9.29079e-05
ttest from fgf

## Sheet: Fig 3D Condensate size
	Condesate size (µm2)				Condesate size (µm2)				Condesate size (µm2)				Condesate size (µm2)				Condesate size (µm2)
Expt 1	Control	LDN		Expt 2	Control	LDN		Expt 3	Control	LDN		Expt 4	Control	LDN		Expt 5	Control	LDN
1	7981.99	10730.1		1	2802.57	7794.34		1	2275.96	8694.23		1	8665.98	7996.11		1	4572.09	7384.75
2	5796.83	16646		2	2134.72	2986.18		2	2861.09	4909.04		2	5286.35	7590.55		2	5405.39	6081.32
3	4731.49	11099.3		3	2507.99	2441.41		3	3395.77	11349.5		3	6787.51	4428.83		3	4937.29	6014.74
4	4473.22	6898.49		4	2681.51	5635.41		4	2461.58	9969.41		4	3839.67	7501.78		4	3918.36	7269.74
5	5367.06	9668.78		5	2580.63	7310.1		5	2800.55	9569.91		5	8304.82	7584.5		5	3290.85	6638.2
6	3119.35	6032.9		6	1852.24	6543.37		6	2368.77	11924.6		6	7673.28	7564.32		6	4925.18	6244.75
7	3541.05	6846.03		7	2362.72	7215.26		7	2419.21	9109.88		7	8107.08	10193.4		7	4991.77	4656.83
8	3990.99	7275.79		8	2524.13	4039.42		8	2413.16	8843.54		8	5897.71	7570.38		8	5701.99	7096.22
9	4346.11	8385.52		9	1396.24	6567.59		9	1922.86	5161.25		9	4396.55	8304.82		9	6452.58	7576.43
10	3256.55	7370.63		10	2084.28	4816.23		10	2338.5	6880.33		10	3595.53	9925.02		10	5946.14	7636.96
11	4422.78	9402.44		11	1630.29	2665.37		11	3585.44	5847.27		11	4396.55	12394.7		11	2988.2	6055.09
12	4255.31	8324.99		12	1210.62	5643.48		12	2445.44	8712.39		12	4515.59	12852.7		12	4602.35	6559.51
13	3014.43	8851.61		13	2746.08	6101.5		13	2041.9	7638.98		13	5659.62	11920.5		13	6095.44	7786.27
14	3767.03	5284.33		14	1961.2	3569.3		14	2372.8	5812.97		14	4037.4	10996.4		14	5375.13	7433.17
15	3668.16	4985.72		15	1783.64	3171.81		15	2284.03	6059.13		15	4612.44	10060.2		15	4993.79	6690.66
16	3208.13	9462.97		16	2891.35	2334.47		16	2407.11	6811.73		16	4077.75	11385.8		16	4586.21	10500.1
17	1953.12	8224.11		17	2386.93	4852.55		17	1680.74	2687.57		17	3210.15	7618.8		17	3702.46	8831.43
18	2114.54	2302.19		18	2461.58	4723.41		18	1743.29	6180.19		18	3480.52	9370.16		18	3930.46	7753.99
19	2217.44	7899.26		19	2090.33	4376.37		19	1769.52	4808.16		19	4237.15	9511.4		19	2768.27	6236.68
20	3428.06	4406.64		20	1595.99	4039.42		20	2443.42	2986.18		20	3212.16	8407.72		20	3254.54	7300.01
	3932.68	8004.89			2184.25	4841.35			2401.56	7197.81			5199.69	9158.91			4621.93	7087.34
	Control	LDN
	3932.68	8004.89
	2184.25	4841.35
	2401.56	7197.81
	5199.69	9158.91
	4621.93	7087.34
Average	3668.02	7258.06
St Dev	1335.24	1584.63
S.E.M	597.139	708.669
Ttest		0.00128125

## Sheet: Fig 3F Condensate size BMP4
	Condensate size (µm2)
	BMP4 Expt 1			BMP4 Expt 2			BMP4 Expt 3			BMP4 Expt 4				BMP4
	0hrs	72hrs		0hrs	72hrs		0hrs	72hrs		0hrs	72hrs			0hrs	72hrs
1	4694.95	1656.69		5876.06	1045.51		5459.43	2676.65		3816.49	2556.77			3654.75	1282.32
2	3788.98	1025.85		6218.01	1076.95		5141.06	1988.82		2564.63	2621.63			4119.82	1421.65
3	5160.71	693.729		3785.05	642.633		7015.9	3012.71		4484.67	1876.8			4160.7	1544.58
4	3804.7	772.338		5137.13	907.94		5669.71	2317.01		4274.39	1361.91			3979.21	1666.37
5	3847.93	715.346		4738.19	964.931		4439.47	2507.64		3352.7	565.988		mean	3978.62	1478.73
6	4936.68	2529.26		5427.98	1629.18		5779.76	2283.61		3452.92	1273.47		s.e.m	114.74	82.3512
7	3714.3	1238.1		4250.81	1238.1		5443.71	1696		3405.76	1853.22		paired t test		0.000113418
8	3498.12	1627.22		5099.79	1395.32		7585.81	1912.18		3448.99	1464.1
9	4671.37			3325.18	1859.11		6558	1735.3		3932.44	1959.34
10	4956.33			3692.68	2110.66		4022.84	986.549		5471.22	3694.65
11	2010.44			3869.55	2293.43		4288.15	957.07		3014.67	467.726
12	3492.23			3535.46	2541.05		2444.76	845.052		4567.21	528.649
13	4470.91			3716.26	1161.45		2849.59	1194.86		4319.59	1438.55
14	2826.01			4107.35	764.477		2623.59	961.001		5084.07
15	3079.53			3763.43	1006.2		2462.44	821.469		3971.74
16	2741.51			2802.43	1782.47		1697.96	764.477		5266.84
17	3863.66			2454.58	1538.78		2189.27	1143.77		3718.23
18	2696.3			3535.46	1393.35		2902.66	717.312		3559.04
19	2124.42			2847.63	1910.21		2205	607.258		4541.66
20	2715.96			4213.47	1171.28		2434.93	1762.82		3336.97
	3654.75	1282.32		4119.82	1421.65		4160.7	1544.58		3979.21	1666.37
