# Supplementary material for: Hierarchical patterning modes orchestrate hair follicle morphogenesis
Source: PLoS Biol. 2017 Jul 11;15(7):e2002117. doi: 10.1371/journal.pbio.2002117 (PMC5507405; doi:10.1371/journal.pbio.2002117)
Supplement: S3 Table — (XLSX) [file pbio.2002117.s012.xlsx]

## Sheet: Data
Pathway and tissue layer	Mean expression
FGF DERMAL			FGF DERMAL NOT EXPRESSED
fibroblast growth factor 7	0.0104647		fibroblast growth factor 20
fibroblast growth factor 18	0.00796597		fibroblast growth factor 16
fibroblast growth factor 9	0.00417691		fibroblast growth factor 6
fibroblast growth factor 10	0.00706248		fibroblast growth factor 3
fibroblast growth factor 12	0.00418628		fibroblast growth factor 15
fibroblast growth factor receptor 2	0.0032945		fibroblast growth factor 4
fibroblast growth factor 14	0.0048637		fibroblast growth factor 8
fibroblast growth factor 13	0.00850086		similar to FGF23; fibroblast growth factor 23
fibroblast growth factor receptor-like 1; similar to fibroblast growth factor receptor 5 beta	0.0152036		shisa homolog 3 (Xenopus laevis)
fibroblast growth factor 11	0.00675313		fibroblast growth factor 2
fibroblast growth factor receptor 1	0.0246751		fibroblast growth factor 1
fibroblast growth factor receptor 4	0.0260974		fibroblast growth factor 5
			fibroblast growth factor 21
FGF EPIDERMAL			fibroblast growth factor 17
fibroblast growth factor 20	0.0115597		fibroblast growth factor 22
fibroblast growth factor receptor 2	0.0553605		fibroblast growth factor binding protein 3
fibroblast growth factor binding protein 1	0.387808		fibroblast growth factor binding protein 1
fibroblast growth factor receptor 3	0.0114244		fibroblast growth factor receptor 3
fibroblast growth factor receptor-like 1; similar to fibroblast growth factor receptor 5 beta	0.00350379
fibroblast growth factor 11	0.0229821		FGF EPIDERMAL NOT EXPRESSED
fibroblast growth factor binding protein 3	0.00570503		fibroblast growth factor 7
fibroblast growth factor receptor 1	0.00397199		fibroblast growth factor 10
			fibroblast growth factor 16
BMP DERMAL			fibroblast growth factor 6
bone morphogenetic protein 4	0.0752728		fibroblast growth factor 3
BMP and activin membrane-bound inhibitor, homolog (Xenopus laevis)	0.0441708		fibroblast growth factor 15
RGM domain family, member A	0.125227		fibroblast growth factor 4
tsukushin	0.0246016		fibroblast growth factor 8
connective tissue growth factor	0.0259544		similar to FGF23; fibroblast growth factor 23
noggin	0.028316		shisa homolog 3 (Xenopus laevis)
RGM domain family, member B	0.182132		fibroblast growth factor 2
bone morphogenetic protein 2	0.0173653		fibroblast growth factor 12
activin receptor IIA	0.0769213		fibroblast growth factor 1
bone morphogenetic protein receptor, type 1B	0.00939534		fibroblast growth factor 9
inhibin beta-B	0.0557459		fibroblast growth factor 5
transmembrane protein with EGF-like and two follistatin-like domains 2	0.0444295		fibroblast growth factor receptor 4
thrombospondin, type I, domain 1	0.024271		fibroblast growth factor 18
bone morphogenetic protein 3	0.0156457		fibroblast growth factor 21
inhibin beta-A	0.0956494		shisa homolog 4 (Xenopus laevis)
bone morphogenetic protein 5	0.0594638		fibroblast growth factor 14
gremlin 1	0.240676		fibroblast growth factor 17
bone morphogenetic protein receptor, type 1A	0.324577		fibroblast growth factor 13
activin A receptor, type 1B	0.0516118		fibroblast growth factor 22
activin A receptor, type 1	0.0299796
gremlin 2 homolog, cysteine knot superfamily (Xenopus laevis)	0.235963		BMP DERMAL NOT EXPRESSED
BMP-binding endothelial regulator	0.0147802		thrombospondin, type I, domain containing 7B
follistatin	0.0745321		bone morphogenetic protein 8b
cysteine rich transmembrane BMP regulator 1 (chordin like)	0.0446183		left right determination factor 1
chordin-like 1	0.00459662		growth differentiation factor 7
bone morphogenetic protein 7	0.0404255		nodal
thrombospondin 1; similar to thrombospondin 1	0.501471		growth differentiation factor 3
growth differentiation factor 10	0.0502531		growth differentiation factor 15
activin receptor IIB	0.0188016		activin A receptor, type IC
decorin	2.78356		bone morphogenetic protein 10
activin A receptor, type II-like 1	0.0136608		growth differentiation factor 1; LAG1 homolog, ceramide synthase 1
growth differentiation factor 11	0.0746314		growth differentiation factor 2
thrombospondin, type I, domain containing 4	0.0623009		growth differentiation factor 9
endoglin	0.0447543		chordin-like 2
thrombospondin, type I, domain containing 7A	0.0132836		growth differentiation factor 5
transmembrane protein with EGF-like and two follistatin-like domains 1; similar to Transmembrane protein with EGF-like and two follistatin-like domains 1	0.125395		bone morphogenetic protein 15
hemochromatosis type 2 (juvenile) (human homolog)	0.0312377		growth differentiation factor 6
thrombospondin 2	0.339792		bone morphogenetic protein 8a
chordin	0.0103298		BMP and activin membrane-bound inhibitor, pseudogene (Xenopus laevis)
kielin/chordin-like protein	0.0434119		DAN domain family, member 5
twisted gastrulation homolog 1 (Drosophila)	0.432538		bone morphogenetic protein 6
thrombospondin 3	0.0109068
bone morphogenetic protein 1	0.553993		BMP EPIDERMAL NOT EXPRESSED
thrombospondin 4	0.0115785		gremlin 2 homolog, cysteine knot superfamily (Xenopus laevis)
follistatin-like 1	2.2015		gremlin 1
			transmembrane protein with EGF-like and two follistatin-like domains 2
BMP EPIDERMAL			left right determination factor 1
connective tissue growth factor	0.00976854		BMP-binding endothelial regulator
noggin	0.0065427		growth differentiation factor 7
BMP and activin membrane-bound inhibitor, homolog (Xenopus laevis)	0.00925152		nodal
RGM domain family, member A	0.0461592		growth differentiation factor 3
tsukushin	0.00435573		growth differentiation factor 15
bone morphogenetic protein 2	0.0391076		activin A receptor, type IC
bone morphogenetic protein 4	0.00379574		bone morphogenetic protein 10
bone morphogenetic protein receptor, type 1B	0.0187717		growth differentiation factor 1; LAG1 homolog, ceramide synthase 1
activin receptor IIA	0.0372994		growth differentiation factor 2
RGM domain family, member B	0.305233		NEL-like 1 (chicken)
follistatin	0.347822		bone morphogenetic protein 3
bone morphogenetic protein receptor, type 1A	0.0844667		thrombospondin 4
activin A receptor, type 1	0.00651278		hemochromatosis type 2 (juvenile) (human homolog)
growth differentiation factor 11	0.00373871		growth differentiation factor 9
activin receptor IIB	0.0169473		chordin-like 2
activin A receptor, type 1B	0.19221		chordin-like 1
thrombospondin 1; similar to thrombospondin 1	0.0208172		inhibin beta-B
bone morphogenetic protein 7	0.337859		growth differentiation factor 10
bone morphogenetic protein 8b	0.00509453		kielin/chordin-like protein
transmembrane protein with EGF-like and two follistatin-like domains 1; similar to Transmembrane protein with EGF-like and two follistatin-like domains 1	0.0272458		growth differentiation factor 5
cysteine rich transmembrane BMP regulator 1 (chordin like)	0.0959066		bone morphogenetic protein 15
activin A receptor, type II-like 1	0.0012051		chordin
thrombospondin, type I, domain containing 7B	0.00946095		thrombospondin, type I, domain containing 7A
twisted gastrulation homolog 1 (Drosophila)	0.252096		endoglin
decorin	0.233028		growth differentiation factor 6
bone morphogenetic protein 1	0.0486427		thrombospondin, type I, domain containing 4
thrombospondin 2	0.00332899		bone morphogenetic protein 8a
follistatin-like 1	0.104864		bone morphogenetic protein 5
thrombospondin 3	0.000674711		thrombospondin, type I, domain 1
			BMP and activin membrane-bound inhibitor, pseudogene (Xenopus laevis)
WNT DERMAL			inhibin beta-A
frizzled homolog 8 (Drosophila)	0.00469616		DAN domain family, member 5
dickkopf homolog 1 (Xenopus laevis)	0.0314726		bone morphogenetic protein 6
frizzled homolog 10 (Drosophila)	0.0393869
receptor tyrosine kinase-like orphan receptor 1	0.0114568		WNT DERMAL NOT EXPRESSED
frizzled homolog 1 (Drosophila)	0.0526767		dickkopf homolog 4 (Xenopus laevis)
frizzled homolog 7 (Drosophila)	0.017625		secreted frizzled-related protein 4
receptor tyrosine kinase-like orphan receptor 2	0.0314849		frizzled-related protein
wingless-type MMTV integration site 9A	0.00383788		wingless-related MMTV integration site 1
frizzled homolog 4 (Drosophila)	0.0240177		similar to wingless related MMTV integration site 8b; wingless related MMTV integration site 8b
frizzled homolog 2 (Drosophila)	0.150766		C1q and tumor necrosis factor related protein 5; membrane-type frizzled-related protein
wingless-related MMTV integration site 5A	0.0843068		cadherin, EGF LAG seven-pass G-type receptor 3 (flamingo homolog, Drosophila)
wingless-related MMTV integration site 5B	0.00272986		C1q and tumor necrosis factor related protein 5; membrane-type frizzled-related protein
dickkopf homolog 2 (Xenopus laevis)	0.0986636		secreted frizzled-related sequence protein 5
wingless-related MMTV integration site 2	0.0145813		low density lipoprotein receptor-related protein 2
wingless related MMTV integration site 2b	0.0187443		frizzled homolog 9 (Drosophila)
similar to LDL receptor-related protein 6; low density lipoprotein receptor-related protein 6	0.0316899		frizzled homolog 5 (Drosophila)
wingless-related MMTV integration site 11	0.0312136		low density lipoprotein receptor-related protein 11
frizzled homolog 3 (Drosophila)	0.01453		dickkopf-like 1
frizzled homolog 6 (Drosophila)	0.00893572		wingless-related MMTV integration site 8A
low density lipoprotein receptor-related protein 4	0.00967133		wingless-related MMTV integration site 7A
wingless-related MMTV integration site 6	0.0150898		wingless related MMTV integration site 10a
low density lipoprotein receptor-related protein associated protein 1	0.0546894		wingless-related MMTV integration site 7B
low density lipoprotein receptor-related protein 5	0.00973168		wingless-related MMTV integration site 16
wingless-related MMTV integration site 4	0.0355715		wingless-related MMTV integration site 3
low density lipoprotein receptor-related protein 8, apolipoprotein e receptor	0.00195472		wingless-type MMTV integration site 9B
cadherin, EGF LAG seven-pass G-type receptor 1 (flamingo homolog, Drosophila)	0.00238944		wingless-related MMTV integration site 3A
low density lipoprotein receptor-related protein 3	0.0137465		wingless related MMTV integration site 10b
secreted frizzled-related protein 2	0.124432
cadherin, EGF LAG seven-pass G-type receptor 2 (flamingo homolog, Drosophila)	0.00482497		WNT EPIDERMAL NOT EXPRESSED
secreted frizzled-related protein 1	0.0960934		receptor tyrosine kinase-like orphan receptor 2
low density lipoprotein receptor-related protein 1	0.0484113		dickkopf homolog 1 (Xenopus laevis)
dickkopf homolog 3 (Xenopus laevis)	0.0177826		dickkopf homolog 2 (Xenopus laevis)
			secreted frizzled-related protein 4
WNT EPIDERMAL			frizzled-related protein
frizzled homolog 10 (Drosophila)	0.648616		wingless-related MMTV integration site 1
frizzled homolog 8 (Drosophila)	0.0081085		similar to wingless related MMTV integration site 8b; wingless related MMTV integration site 8b
wingless-related MMTV integration site 5B	0.0027252		C1q and tumor necrosis factor related protein 5; membrane-type frizzled-related protein
frizzled homolog 7 (Drosophila)	0.0231844		wingless-related MMTV integration site 11
frizzled homolog 1 (Drosophila)	0.0259063		cadherin, EGF LAG seven-pass G-type receptor 3 (flamingo homolog, Drosophila)
receptor tyrosine kinase-like orphan receptor 1	0.00211613		C1q and tumor necrosis factor related protein 5; membrane-type frizzled-related protein
frizzled homolog 2 (Drosophila)	0.10074		secreted frizzled-related sequence protein 5
dickkopf homolog 4 (Xenopus laevis)	0.12269		low density lipoprotein receptor-related protein 2
wingless-related MMTV integration site 7A	0.126564		frizzled homolog 9 (Drosophila)
wingless-related MMTV integration site 16	0.00999005		wingless related MMTV integration site 2b
wingless related MMTV integration site 10a	0.0853454		frizzled homolog 4 (Drosophila)
wingless-related MMTV integration site 7B	0.119298		dickkopf-like 1
frizzled homolog 5 (Drosophila)	0.00105094		wingless-related MMTV integration site 8A
similar to LDL receptor-related protein 6; low density lipoprotein receptor-related protein 6	0.0432657
wingless-related MMTV integration site 3	0.319478
wingless-type MMTV integration site 9B	0.030694
wingless-type MMTV integration site 9A	0.00179669
frizzled homolog 6 (Drosophila)	0.166987
wingless-related MMTV integration site 3A	0.0963272
low density lipoprotein receptor-related protein 4	0.0575163
frizzled homolog 3 (Drosophila)	0.0168662
wingless-related MMTV integration site 5A	0.000845882
cadherin, EGF LAG seven-pass G-type receptor 1 (flamingo homolog, Drosophila)	0.20463
low density lipoprotein receptor-related protein 8, apolipoprotein e receptor	0.00081117
wingless related MMTV integration site 10b	0.220034
low density lipoprotein receptor-related protein 5	0.0291034
wingless-related MMTV integration site 6	0.608673
low density lipoprotein receptor-related protein 3	0.00699476
wingless-related MMTV integration site 4	0.262697
low density lipoprotein receptor-related protein associated protein 1	0.0313939
cadherin, EGF LAG seven-pass G-type receptor 2 (flamingo homolog, Drosophila)	0.0402159
secreted frizzled-related protein 2	0.00867516
secreted frizzled-related protein 1	0.0698398
low density lipoprotein receptor-related protein 1	0.0216076
wingless-related MMTV integration site 2	0.0199691
low density lipoprotein receptor-related protein 11	0.00154486
dickkopf homolog 3 (Xenopus laevis)	0.00289233
