# Supplementary material for: Hierarchical patterning modes orchestrate hair follicle morphogenesis
Source: PLoS Biol. 2017 Jul 11;15(7):e2002117. doi: 10.1371/journal.pbio.2002117 (PMC5507405; doi:10.1371/journal.pbio.2002117)
Supplement: S4 Data — (XLSX) [file pbio.2002117.s016.xlsx]

## Sheet: Fig 7A TGFß2 8hrs
	Gene symbol	Quantity (copies)
		Con 1	Con 2	Con 3	Con 4	TGF 1	TGF 2	TGF 3	TGF 4
	Tbp	0.5484	0.4478	0.443	0.456	0.5714	0.425	0.6548	0.4751
		0.507	0.4901	0.4993	0.5139	0.685	0.504	0.6374	0.4959
		0.5507	0.4898	0.5108	0.5121	0.6533	0.5392
		0.535367	0.4759	0.484367	0.494	0.636567	0.4894	0.6461	0.4855
	Dclk1		0.6346	0.8778	0.4759	1.05	1.24	1.13	2.6
		0.5345	0.5804	0.7935	0.5359	1.03	1.38	1.41	2.45
		0.5399	0.5722	0.8206	0.629	1.06	1.24	1.28
		0.5372	0.595733	0.830633	0.546933	1.04667	1.28667	1.27333	2.525
		1.00342	1.2518	1.71489	1.10715	1.64424	2.62907	1.9708	5.20082
		1.26932				2.86123
		1	0.123698			2.25415	0.281803		0.141513
	Tgfbr3	0.5726	0.5792	0.7153	0.5553	0.7339	0.5514	0.9946	0.6494
		0.6165	0.5659	0.7212	0.5675	0.7068	0.5928	0.672	0.6053
		0.5883	0.5606	0.7542	0.5304	0.6592	0.5448	0.9648	0.5926
		0.592467	0.568567	0.730233	0.551067	0.699967	0.563	0.877133	0.615767
		1.10666	1.19472	1.5076	1.11552	1.0996	1.15039	1.35758	1.26831		-1.11961	-1.07018	-0.906851	-0.970678
		1.23112				1.21897
		1	0.0765656			0.990127	0.0477185		0.916893
						-1.00997	0.0479899
	Sdc1	0.5031	0.451	0.3968	0.4509	0.6698	0.4044	0.5906	0.4111
		0.546	0.4506	0.3958	0.4247	0.6829	0.4132	0.5614	0.4261
		0.5178	0.47	0.42	0.4186	0.6914	0.4221	0.6281	0.4103
		0.5223	0.4572	0.4042	0.4314	0.681367	0.413233	0.593367	0.415833
		0.975593	0.960706	0.834492	0.873279	1.07038	0.844367	0.918382	0.856505
		0.911018				0.922408
		1	0.0373845			1.0125	0.0562844		0.861414
	Fn1	0.4871	0.3984	0.4061	0.4597	0.7791	0.5359	2.34	0.6138
		0.4571	0.3775	0.4621	0.5056	0.8531	0.5434	2.08	0.6272
		0.5123	0.3981	0.48	0.4622	0.8171	0.5789		0.5736
		0.4855	0.391333	0.4494	0.475833	0.816433	0.552733	2.21	0.604867
		0.906855	0.822302	0.92781	0.963225	1.28256	1.12941	3.42052	1.24586
		0.905048				1.76959
		1	0.0330751			1.95524	0.311529		0.214814
	Tbp 2	0.5721	0.4866	0.4925	0.4981	0.7248	0.4978	0.5528	0.3997
		0.6266	0.549	0.5337	0.4767	0.6859	0.4842	0.588	0.4059
		0.6907	0.5363		0.5604	0.7553	0.4555	0.6673	0.4476
		0.6298	0.523967	0.5131	0.511733	0.722	0.479167	0.6027	0.417733
	Tgfbi	0.3986	0.3276	0.3123	0.2831	0.8118	0.5228	0.7003	0.4899
		0.3571	0.3349	0.323	0.2796	0.9042	0.5999	0.7426	0.5396
		0.3259	0.3262	0.3136	0.2888	0.8273	0.6279	0.6711	0.6044
		0.360533	0.329567	0.3163	0.283833	0.847767	0.583533	0.704667	0.544633
		0.572457	0.628984	0.616449	0.554651	1.17419	1.21781	1.16918	1.30378
		0.593135				1.21624
		1	0.0297533			2.05053	0.0256168		1.75766e-05
	Thbs2	0.2482	0.3273	0.35	0.2798	0.6734	0.6306	0.6011	0.623
		0.2838	0.3471	0.2962	0.338	0.7331	0.6506	0.5894	0.6551
		0.2703	0.3374	0.3703	0.3173	0.7738	0.6291	0.6455	0.6984
		0.267433	0.337267	0.338833	0.3117	0.726767	0.636767	0.612	0.658833
		0.424632	0.64368	0.660365	0.609106	1.0066	1.3289	1.01543	1.57716
		0.584446				1.23202
		1	0.0929598			2.10802	0.111447		0.0123882
	Thbs4	0.3019	0.652	0.4015	0.2716	0.7557	0.4565	1.42	1.12
		0.3058	0.7179	0.3836	0.3169	0.7056	0.3952	1.31	0.9584
		0.2428	0.6538	0.4271	0.223	0.7668	0.5957	1.45	1.16
		0.2835	0.674567	0.404067	0.2705	0.7427	0.482467	1.39333	1.07947
		0.450143	1.28742	0.787501	0.528596	1.02867	1.00689	2.31182	2.5841
		0.763416				1.73287
		1	0.247511			2.26989	0.240414		0.0983877
	TnC	0.2431	0.2407	0.1494		0.7122	0.6554	1.03	0.7146
		0.2489	0.2558	0.1474	0.2157	0.7265	0.6568	0.9926	0.753
		0.256	0.2616	0.1455	0.1937	0.7461	0.6576	0.9811	0.7549
		0.249333	0.2527	0.147433	0.2047	0.728267	0.6566	1.00123	0.740833
		0.395893	0.482283	0.287338	0.400013	1.00868	1.3703	1.66125	1.77346
		0.391382				1.45342
		1	0.102156			3.71356	0.117558		0.00667358
	Tgfß2	0.8623	0.8506	0.6085	0.8324	0.6094	0.6527	0.6343	0.5356
		0.9091	0.8275	0.6536	0.6725		0.6412	0.6081	0.5795
		0.8669	0.8516	0.6056	0.5958	0.6251	0.6459	0.6257	0.5719
		0.879433	0.843233	0.622567	0.700233	0.61725	0.6466	0.6227	0.562333
		1.39637	1.60933	1.21334	1.36836	0.854917	1.34943	1.03318	1.34615		-1.6339	-1.03514	-1.35198	-1.03766
		1.39685				1.14592
		1	0.0583185			0.820361	0.106552		0.14547
						-1.21898	0.143809
	Smad7	0.4022	0.4252	0.304	0.3269	0.7233	0.7484	0.6352	1.25
		0.4087	0.4039	0.3065	0.3299	0.7513	0.7566	0.7337	0.6559
		0.395	0.4054	0.2886	0.356	0.7627	0.7048	0.6699	0.615
		0.401967	0.4115	0.2997	0.3376	0.745767	0.7366	0.6796	0.8403
		0.638245	0.785355	0.584097	0.659719	1.03292	1.53725	1.12759	2.01157
		0.666854				1.42733
		1	0.063858			2.1404	0.156507		0.0398759

## Sheet: Fig 7A FGF and BMP 8hrs
	Gene symbol	Quantity (copies)										Quantity (copies)
		Control 1	Control 2	Control 3	FGF9 1	FGF9 2	FGF9 4					BMP4 2	BMP4 3	BMP4 4
	Tbp 1	0.05406	0.04655	0.05851	0.06846	0.05169	0.04365					0.08146	0.06598	0.05648
		0.05529	0.05153	0.05432	0.06572	0.04814	0.05282					0.08875	0.06731	0.04795
		0.05022	0.05416	0.05855	0.0696	0.05218	0.04308					0.08582	0.0786	0.0487
		0.05319	0.0507467	0.0571267	0.0679267	0.05067	0.0465167					0.0853433	0.07063	0.0510433
	Tgfbr3	0.3795	0.5618	0.5844	0.334	0.3715	0.4069					0.3226	0.2075	0.184
		0.338	0.4725	0.5775	0.3699	0.4494	0.3423					0.3063	0.2318	0.2046	-2.45215	-2.90527	-2.37353
		0.35875	0.51715	0.58095	0.35195	0.41045	0.3746					0.31445	0.21965	0.1943
		6.74469	10.1908	10.1695	5.18132	8.10045	8.05303	-1.74376	-1.11537	-1.12194		3.68453	3.10987	3.80657
		9.035			7.1116							3.53366
		1	0.160844		0.787117	0.135727	0.270231					0.391107	0.0607876	0.0368018
					-1.27046	0.208378						-2.55684	0.165705
	Sdc1	0.5306	0.5724	0.6582	0.6646	0.6192	0.6327					0.6464	0.4626	0.363
		0.4268	0.5014	0.6736	0.7549	0.6763	0.4819					0.6292	0.5506	0.3924	-1.39324	-1.45165	-1.40712
		0.4787	0.5369	0.6659	0.70975	0.64775	0.5573					0.6378	0.5066	0.3777
		8.99981	10.58	11.6566	10.4488	12.7837	11.9807					7.47334	7.17259	7.3996
		10.4121			11.7377							7.34851
		1	0.0605091		1.12731	0.0583499	0.269084					0.705765	0.0123154	0.0561382
	Fn1	0.4599	0.5431	0.6326	0.4602	0.4979	0.5587					0.476	0.351	0.2724
		0.3905	0.4656	0.629	0.5051	0.5166	0.4404					0.5038	0.3781	0.2782	-1.68252	-1.87124	-1.79073
		0.4252	0.50435	0.6308	0.48265	0.50725	0.49955					0.4899	0.36455	0.2753
		7.99398	9.93858	11.0421	7.10546	10.0109	10.7392	-1.35927	-0.964776	-0.899347		5.74034	5.1614	5.39346
		9.65823			9.28516							5.43173
		1	0.107218		0.961372	0.11954	0.806753					0.562394	0.0309694	0.0376978
					-1.04018	0.14365						-1.77811	0.0546749
	Tbp 2	Con 1	Con 2	Con 3	FGF1	FGF2	FGF4					BMP2	BMP3	BMP4
		0.6089	0.6791	0.7105	0.9123	0.6853	0.6297					0.8831	0.8737	0.6096
		0.6108	0.6106	0.6504	0.8399	0.6905	0.6239					0.8492	0.7713	0.6545
		0.6369	0.6447	0.6533	0.8621	0.6515	0.6417					0.8359	0.7805	0.6316
		0.618867	0.6448	0.6714	0.871433	0.675767	0.631767					0.856067	0.8085	0.6319
	Tgfbi	0.5682	0.5803	0.6715	0.4809	0.4975	0.3396					2.12	2.03	1.18
		0.5952	0.5785	0.6991	0.6113	0.4447	0.394					2.14	1.53	1.16
		0.5817	0.5794	0.6853	0.5461	0.4711	0.3668					2.13	1.78	1.17
		0.5817	0.5794	0.6853	0.5461	0.4711	0.3668					2.13	1.78	1.17
		0.939944	0.898573	1.0207	0.626669	0.697134	0.580594	-1.52086	-1.36713	-1.64155		2.48812	2.20161	1.85156
		0.953073			0.634799							2.18043
		1	0.103528		0.666055	0.0533821	0.00300566					2.28779	0.084417	0.0186919
					-1.50138	0.0794087
	Thbs2	0.7385	0.819	0.8757	1.55	1.51	2.21					0.7434	0.5837	0.5266
		0.7086	0.7646	0.8323	1.67	1.7	2.2					0.6862	0.4733	1.04
		0.7512	0.889	0.9744	1.87	1.67	2.35					0.701	0.4412	0.512	-1.52442	-2.04743	-1.15339
		0.732767	0.8242	0.894133	1.69667	1.62667	2.25333					0.7102	0.4994	0.692867
		1.18405	1.27823	1.33174	1.94698	2.40714	3.56672					0.829608	0.617687	1.09648
		1.26467			2.64028							0.847926
		1	0.158219		2.08772	0.182514	0.102776					0.670471	0.163362	0.0838798
												-1.49149	0.259327
	Thbs4	0.4858	0.8022	0.4662	0.8797	0.6296	0.9248					1.6	1.83	1.96
		0.4877	0.687	0.5969	0.6702	0.7379	1.43					1.93	2.01	1.66
		0.4281	0.7344		0.6991	0.7048	1.15					1.46	1.83	1.91
		0.4672	0.7412	0.53155	0.749667	0.690767	1.16827					1.66333	1.89	1.84333
		0.754928	1.1495	0.791704	0.860269	1.0222	1.84921					1.943	2.33766	2.91713
		0.898712			1.24389							2.39926
		1	0.114997		1.38408	0.2462	0.382607					2.66967	0.117907	0.0202393
	TnC	0.8004	0.6407	0.6627	2.71	2.25	3.87					1.38	1.51	1.1
		0.7927	0.6613	0.6437	2.7	2.55	3.71					1.36	0.8893	1.09
		0.802	0.6831	0.7346	2.77	2.34	3.82					1.44	0.965	1.08
		0.798367	0.6617	0.680333	2.72667	2.38	3.8					1.39333	1.12143	1.09
		1.29005	1.02621	1.01331	3.12894	3.52193	6.01488					1.6276	1.38705	1.72496
		1.10985			4.22192							1.57987
		1	0.529343		3.80403	0.214033	0.0735473					1.42349	0.0635627	0.0257653
	Tgfb2	0.7313	0.9411	1.04	0.4493	0.4009	0.3752					0.8055	0.7859	0.9157
		0.6858	0.8452	1.06	0.4744	0.4358	0.3544					0.7048	0.8106	0.8674
		0.7323	0.9961	1.09	0.4486	0.3626	0.3464					0.7821	0.8116	0.8685	-1.56091	-1.40335	-0.996094
		0.716467	0.927467	1.06333	0.457433	0.399767	0.358667					0.764133	0.8027	0.883867
		1.15771	1.43838	1.58376	0.524921	0.591575	0.56772	-2.65427	-2.35521	-2.45417		0.89261	0.992826	1.39874
		1.39328			0.561405							1.09473
		1	0.194266		0.402938	0.0347321	0.0198063					0.785719	0.141348	0.210881
					-2.48177	0.0879625						-1.27272	0.168275
	Smad 7	0.2605	0.4145	0.5582	0.6437	0.5193	0.6212					3.28	2.46	2.28
		0.293	0.4126	0.5293	0.528		0.7623					3.34	2.57	1.79
		0.2382	0.475	0.546	0.6169	0.5426	0.6392					3.23	2.59	2.24
		0.2639	0.434033	0.5445	0.5962	0.53095	0.674233					3.28333	2.54	2.10333
		0.426425	0.673129	0.810992	0.68416	0.7857	1.06722					3.83537	3.14162	3.32859
		0.636848			0.845693							3.43519
		1	0.145805		1.32793	0.135482	0.26326					5.39405	0.0603287	0.00112653

## Sheet: Fig 7B TGFß2 24hrs
	Gene symbol		Quantity (copies)
			Con 1	Con 2	Con 3	Con 4	TGF 1	TGF 2	TGF 3	TGF 4
	Tbp		0.04254	0.05094	0.05184	0.05305	0.06113	0.02391	0.05867	0.06636
			0.03575	0.0529	0.05279	0.05686	0.06662	0.02813	0.06188	0.05675
			0.04229	0.04723	0.0529	0.05952	0.06113	0.03345	0.05983	0.05732
			0.0401933	0.0503567	0.05251	0.0564767	0.06296	0.0284967	0.0601267	0.0601433
	Tgfbr3		0.04252	0.06528	0.05404	0.05227	0.0469	0.01932	0.04143	0.0401
			0.04023	0.06312	0.05806	0.05126	0.04418	0.02354	0.03906	0.0404
			0.03878	0.05825	0.05692	0.05087	0.04547	0.02277	0.03858	0.04096
			0.04051	0.0622167	0.05634	0.0514667	0.0455167	0.0218767	0.03969	0.0404867
			1.00788	1.23552	1.07294	0.911291	0.722946	0.767692	0.660106	0.67317		-1.46194	-1.37673	-1.60112	-1.57005
			1.05691				0.705979
			1	0.0645005			0.667967	0.0348817		0.00972908
							-1.49708	0.0514373
	Sdc1		0.03496	0.05729	0.09163	0.05477	0.06331	0.03973	0.06999	0.06598
			0.03475	0.05523	0.05161	0.05962	0.0632	0.03604	0.06929	0.0697
			0.03819	0.05631	0.05324	0.05998	0.06922	0.0359	0.06494	0.05961
			0.0359667	0.0562767	0.0654933	0.0581233	0.0652433	0.0372233	0.0680733	0.0650967
			0.894842	1.11756	1.24725	1.02916	1.03627	1.30623	1.13217	1.08236
			1.0722				1.13926
			1	0.0691733			1.06254	0.0517908		0.507084
	Fn1		0.03317	0.06058	0.05598	0.0459	0.1505	0.1058	0.2199	0.1276
			0.03782	0.06424	0.05884	0.04378	0.1561	0.1119	0.2595	0.1317
			0.03829	0.06984	0.05863	0.05125	0.1543	0.1156	0.2047	0.1263
			0.0364267	0.0648867	0.0578167	0.0469767	0.153633	0.1111	0.228033	0.128533
			0.906286	1.28854	1.10106	0.831789	2.44017	3.8987	3.79255	2.13712
			1.03192				3.06714
			1	0.0994855			2.97226	0.148091		0.0180891
	Smad7		0.4846	0.5838	0.588	0.5647	1.45	1.34	1.89	1.79
			0.4601	0.5161	0.5696	0.5145	1.51	1.6	2.02	1.6
			0.5046	0.5307	0.5694	0.4926	1.45	1.29	2.23	1.48
			0.4831	0.543533	0.575667	0.523933	1.47	1.41	2.04667	1.62333
			12.0194	10.7937	10.963	9.27699	23.3482	49.4795	34.0393	26.9911
			10.7633				33.4645
			1	0.052473			3.10914	0.172754		0.0287558
	Tgfbi		0.4359	0.5712	0.7437	0.4664	2.32	1.79	3.9	2.09
			0.3889		0.7448	0.5003	2.19	1.87	3.61	1.71
			0.4254	0.5342	0.6186	0.4622	2.03	1.93	3.63	2.19
			0.416733	0.5527	0.702367	0.4763	2.18	1.86333	3.71333	1.99667
			10.3682	10.9757	13.3759	8.43357	34.6252	65.3878	61.7585	33.1985
			10.7883				48.7425
			1	0.0944216			4.51807	0.176425		0.0207619
	Thbs2		0.3891	0.506	0.5169	0.465	0.8832	0.5021	1.27	0.793
			0.4247	0.6068	0.5502	0.5232	0.8976	0.4806	1.27	0.8356
			0.4385	0.6473	0.4701	0.5733	0.9285	0.505	1.47	0.8784
			0.417433	0.5867	0.5124	0.5205	0.9031	0.4959	1.33667	0.835667
			10.3856	11.6509	9.75814	9.2162	14.344	17.402	22.2308	13.8946
			10.2527				16.9679
			1	0.0510822			1.65496	0.11313		0.035108
	Thbs4		0.02491	0.03887	0.05332	0.03435	0.4855	0.555	1.26	0.519
			0.03502	0.03088	0.03957	0.04447	0.4505	0.6134	1.13	0.4833
			0.03561	0.04937	0.0493	0.04536	0.451	0.5917	1.03	0.5894
			0.0318467	0.0397067	0.0473967	0.0413933	0.462333	0.5867	1.14	0.530567
			0.792337	0.788509	0.902622	0.732928	7.34329	20.5884	18.96	8.8217
			0.804099				13.9283
			1	0.0441932			17.3217	0.244453		0.0308371
	TnC		0.09507	0.1421	0.1341	0.1254	0.5079	0.4729	0.8848	0.4934
			0.1041	0.1323	0.1447	0.1223	0.5336	0.44	0.8941	0.5054
			0.1054	0.1213	0.1478	0.104	0.533	0.4185	0.9041	0.4624
			0.101523	0.1319	0.1422	0.117233	0.524833	0.4438	0.894333	0.487067
			2.52587	2.61932	2.70806	2.07578	8.33598	15.5738	14.8742	8.09843
			2.48226				11.7206
			1	0.0566029			4.72174	0.173054		0.0195555

## Sheet: Fig 7B FGF and BMP4 24 hrs
	Gene symbol	Quantity (copies)
		Control 1	Control 2	Control 3	FGF9 1	FGF9 2	FGF9 3					BMP4 1	BMP4 2	BMP4 3
	Tbp	0.3809	0.5736	0.4654	0.5374	0.41	0.3701					0.6592	0.4236	0.5795
		0.3339	0.5587	0.5029	0.6456	0.4718	0.3588					0.6338	0.4171	0.5646
		0.4075	0.5994	0.499	0.5828	0.4898	0.3552					0.6771	0.4634	0.6627
		0.3741	0.577233	0.4891	0.5886	0.4572	0.361367					0.6567	0.4347	0.602267
	Smad7	0.2137	0.2711	0.2183	0.3182	0.2323	0.2293					0.8425	0.7386	0.9037
		0.1975	0.2742	0.2053	0.3377	0.2704	0.246					0.8066	0.7084	0.8726
		0.2153	0.3218	0.2149	0.304	0.2465	0.236					0.8615	0.7803	0.9713
		0.208833	0.289033	0.212833	0.319967	0.249733	0.2371					0.836867	0.742433	0.915867
		0.558229	0.500722	0.435153	0.543606	0.546223	0.65612					1.27435	1.70792	1.5207
		0.498034			0.581983							1.50099
		1			1.16856	0.074445	0.177672					3.01383	0.252087	0.0106784
	Tgfbi	0.4833	0.7834	0.4475	0.6234	0.6039	0.6322					0.662	0.3874	0.5893
		0.523	0.8202	0.4441	0.6	0.5828	0.6131					0.6541	0.4272	0.6378
		0.4906	0.8346	0.4908	0.6469	0.6475	0.6368					0.6109	0.4027	0.6495
		0.498967	0.812733	0.4608	0.623433	0.6114	0.627367					0.642333	0.405767	0.625533
		1.33378	1.40798	0.942139	1.05918	1.33727	1.73609					0.978123	0.933441	1.03863	-1.25543	-1.31553	-1.18229
		1.22797			1.37751							0.983398
		1			1.12179	0.159973	0.575634					0.800835	0.0248219	0.229378
												-1.2487	0.0385229
	Thbs2	0.8045	1.27	0.9824	1.54	1.1	1.19					1.14	0.5878	0.7879
		0.7812	1.23	1.04	1.6	1.19	1.23					1.09	0.5607	0.7958
		0.8413	1.34	1.02	1.57	1.16	1.24					1.05	0.6656	0.8133
		0.809	1.28	1.01413	1.57	1.15	1.22					1.09333	0.6047	0.799
		2.16252	2.21747	2.07347	2.66735	2.51531	3.37607					1.66489	1.39107	1.32665	-1.29207	-1.5464	-1.62149
		2.15116			2.85291							1.46087
		1			1.32622	0.1233	0.114693					0.679111	0.0482019	0.012348
												-1.47251	0.0996765
	Thbs4	0.1594	0.1403	0.2103	0.3344	0.2831	0.1795					0.4721	0.5134	0.6677
		0.2484	0.2197	0.1846	0.3163	0.2509	0.22					0.6729	0.5543	0.5664
		0.176	0.2071	0.2031	0.3427	0.2465	0.1859					0.4832	0.5716	1.29
		0.1946	0.189033	0.199333	0.331133	0.260167	0.195133					0.542733	0.546433	0.841367
		0.520182	0.327482	0.407551	0.562578	0.569043	0.539987					0.826456	1.25704	1.397
		0.418405			0.557203							1.16016
		1			1.33173	0.0210511	0.127753					2.77283	0.410312	0.0390018
	TnC	0.286	0.4398	0.3964	1.01	0.6618	0.6252					1.33	0.7428	0.9573
		0.2967	0.4234	0.3809	1.14	0.6631	0.6535					1.32	0.7087	0.9201
		0.3246	0.4459	0.3864	1.02	0.6673	0.5997					1.3	0.773	0.9542
		0.302433	0.436367	0.3879	1.05667	0.664067	0.626133					1.31667	0.7415	0.943867
		0.808429	0.755962	0.793089	1.79522	1.45246	1.73268					2.00497	1.70577	1.56719
		0.785827			1.66012							1.75931
		1			2.11258	0.134109	0.0127836					2.2388	0.164389	0.0160602
Quantity		Control 1	Control 2	Control 3	FGF9 1	FGF9 2	FGF9 3					BMP4 1	BMP4 2	BMP4 3
	Tbp	0.0270367	0.04114	0.0315967	0.0428267	0.0322067	0.0310033					0.0468733	0.03676	0.0423567
	B-Actin	0.34385	0.5959	0.45215	0.58645	0.3976	0.36635					0.65865	0.52265	0.5972
	Value to divide by	0.0270367	0.04114	0.0315967	0.0428267	0.0322067	0.0310033					0.0468733	0.03676	0.0423567
	Tgfbr3	0.5252	0.6759	0.4712	0.4422	0.5552	0.45					0.2754	0.1334	0.2437
		0.4651	0.6438	0.4753	0.5219	0.6155	0.451					0.2697	0.1237	0.2285
		0.49515	0.65985	0.47325	0.48205	0.58535	0.4505					0.27255	0.12855	0.2361
		18.314	16.0391	14.9778	11.2558	18.1748	14.5307	-1.4609	-0.90475	-1.13165		5.81461	3.49701	5.57409	-2.82799	-4.70221	-2.95002
		16.4437			14.6538							4.9619
		1			0.89115	0.121523	0.481963					0.301752	0.0447425	0.0010459
					-1.12214	0.161451						-3.31398	0.605428
	Sdc1	0.2987	0.4412	0.3082	0.6662	0.4971	0.4932					0.3549	0.2373	0.2876
		0.2659	0.4095	0.3243	0.6991	0.4748	0.5047					0.3098	0.2318	0.3071
		0.2823	0.42535	0.31625	0.68265	0.48595	0.49895					0.33235	0.23455	0.29735
		10.4414	10.3391	10.009	15.9398	15.0885	16.0934	-0.643868	-0.680197	-0.637723		7.09039	6.38058	7.02015	-1.44747	-1.6085	-1.46196
		10.2631			15.7073							6.83037
		1			1.53045	0.0304528	0.000971955					0.665524	0.0220019	0.000677488
												-1.50258	0.0514313
	Fbn1	0.5738	0.6791	0.4996	0.5058	0.5321	0.4475					0.3767	0.2592	0.4161
		0.4897	0.6212	0.5157	0.5166	0.5998	0.4783					0.3409	0.2364	0.4179
		0.53175	0.65015	0.50765	0.5112	0.56595	0.4629					0.3588	0.2478	0.417
		19.6677	15.8034	16.0666	11.9365	17.5724	14.9307	-1.43922	-0.977622	-1.1506		7.65467	6.74102	9.84497	-2.24428	-2.54846	-1.74497
		17.1792			14.8132							8.08022
		1			0.862274	0.0947669	0.316822					0.470349	0.0536083	0.00542621
					-1.15972	0.134638						-2.12608	0.234215

## Sheet: Fig 7A & B Summary
	8 hrs													24 hrs
	TGFß2				FGF9				BMP4					TGFß2				FGF9				BMP4
	Fold change	s.e.m	p value		Fold change	s.e.m	p value		Fold change	s.e.m	p value			Fold change	s.e.m	p value		Fold change	s.e.m	p value		Fold change	s.e.m	p value
Adhesion																										Adhesion
Fn	1.95524	0.311529	0.214814		-1.04018	0.14365	0.806753		-1.77811	0.0546749	0.0376978	*		2.97226	0.148091	0.0180891	*	-1.15972	0.134638	0.316822		-2.12608	0.234215	0.00542621	**	Fn
Sdc1	1.0125	0.0562844	0.861414		1.12731	0.0583499	0.269084		-1.4169	0.0176209	0.0561382			1.06254	0.0517908	0.507084		1.53045	0.0304528	0.000971955	**	-1.50258	0.0514313	0.000677488	***	Sdc1
Tnc1	3.71356	0.117558	0.00667358	**	3.80403	0.214033	0.0735473		1.42349	0.0635627	0.0257653	*		4.72174	0.173054	0.0195555	*	2.11258	0.134109	0.0127836	*	2.2388	0.164389	0.0160602	*	Tnc1
TGFB response																										TGFB response
Smad7	2.1404	0.156507	0.0398759	*	1.32793	0.135482	0.26326		5.39405	0.0603287	0.00112653	**		3.10914	0.172754	0.0287558	*	1.16856	0.074445	0.177672		3.01383	0.252087	0.0106784	*	Smad7
Tgfbi	2.05053	0.0256168	1.75766e-05	***	-1.50138	0.0794087	0.00300566	**	2.28779	0.084417	0.0186919	*		4.51807	0.176425	0.0207619	*	1.12179	0.159973	0.575634		-1.2487	0.0385229	0.229378		Tgfbi
Tgfbr3	-1.00997	0.0479899	0.916893		-1.27046	0.208378	0.270231		-2.55684	0.165705	0.0368018	*		-1.49708	0.0514373	0.00972908	**	-1.12214	0.161451	0.481963		-3.31398	0.605428	0.0010459	**	Tgfbr3
Thbs2	2.10802	0.111447	0.0123882	*	2.08772	0.182514	0.102776		-1.49149	0.259327	0.0838798			1.65496	0.11313	0.035108	*	1.32622	0.1233	0.114693		-1.47251	0.0996765	0.012348	*	Thbs2
Thbs4	2.26989	0.240414	0.0983877		1.38408	0.2462	0.382607		2.66967	0.117907	0.0202393	*		17.3217	0.244453	0.0308371	*	1.33173	0.0210511	0.127753		2.77283	0.410312	0.0390018	*	Thbs4

## Sheet: Fig 7E & F bead quantification
Areas (µm2)	BSA Areas					FGF9 beads					FGF9 beads + TGFB2					FGF9 beads + LY2109761					TGFB2 beads					TGFB2 beads + FGF9
	Cells plus bead	Bead	Relative area of cells	Net area of cells		Cells plus bead	Bead	Relative area of cells	Net area of cells		Cells plus bead	Bead	Relative area of cells	Net area of cells		Cells plus bead	Bead	Relative area of cells	Net area of cells		Cells plus bead	Bead	Relative area of cells	Net area of cells		Cells plus bead	Bead	Relative area of cells	Net area of cells
																					35558.1	6820.07	5.21374	28738		75567.5	12104.3	6.24301	63463.1
2016-09-01	13666.2	8121.62	1.68269	5544.56		22881.1	10490.4	2.18114	12390.7		281237	18247.6	15.4123	262989							27957.1	5284.26	5.29064	22672.8		67914.4	15514.4	4.37752	52400
	5544.56	4138.9	1.33962	1405.66		45866.3	16217.2	2.82825	29649.1		63046.6	9266.97	6.80337	53779.7							31757.6	6052.17	5.25219	25705.4		21813.8	5648.69	3.86175	16165.1
	24859.4	15228	1.63248	9631.4		32252.2	11948.1	2.69935	20304		76478.6	14889.6	5.13636	61588.9												55098.6	11089.1	4.82743	44009.4
	14690.1	9162.85	1.5516	5527.21		36026.7	5544.56	6.49765	30482.1		257237	11193.3	22.9814	246043
						34256.6	11050.1	3.5516	23206.5		127551	21137	6.03448	106414
											161110	14946.9	11.2736	146163
2016-11-01						19575.2	7158.48	2.73455	12416.7		40608.1	4997.92	8.125	35610.2		5206.16	4633.49	1.1236	572.678
						35532.1	7835.28	4.53488	27696.8		40790.3	4425.24	9.21765	36365.1		9136.82	7548.94	1.21034	1587.88
						36495.2	12026.2	3.03463	24469		81294.3	7210.54	11.2744	74083.7		7601	7783.22	0.976589	-182.216
						20356.1	4503.33	4.52023	15852.8		152072	9162.85	16.5966	142909		7340.69	4269.05	1.71951	3071.64
						23896.3	5388.38	4.43478	18507.9		72600	8355.89	8.68847	64244.1		5492.5	3410.04	1.61069	2082.47
						47922.7	5804.87	8.25561	42117.9		171803	20434.2	8.40764	151369		3410.04	3410.04	1	0
						30629.6	7119.43	4.58578	23510.2		93194.7	9097.77	10.385	84096.9		3982.72	2368.8	1.68132	1613.91
																6024.28	4774.8	1.33172
2016-09-07						37822.8	10854.9	3.48441	26967.9		24442.9	4060.81	6.01923	20382.1
						25614.3	6481.67	3.95181	19132.7		136167	7184.51	18.9529	128983
						22152.2	8668.26	2.55556	13484		73146.6	5726.78	12.7727	67419.8
						22256.4	10906.9	2.04057	11349.4		120132	6117.24	19.6383	114015
						13510	4763.64	2.83607	8746.36		27696.8	5049.98	5.48454	22646.8
						17727	9813.62	1.80637	7913.37		74109.7	6611.83	11.2087	67497.9
						16711.8	5961.06	2.80349	10750.7		75949.3	5791.86	12.3461	70157.4
						22256.4	8207.15	2.78261	14049.2
2016-11-08
	14733.4	9683.47	1.52151	5049.98		13770.3	5128.07	2.68528	8642.23		241332	12833.2	18.8053	228499		20876.7	11948.1	1.74728	8928.57
	17440.6	13327.8	1.30859	4112.87		23583.9	9813.62	2.40318	13770.3		21006.9	6689.92	3.14008	14317		7548.94	7548.94	1	0
	9839.65	9839.65	1	0		24885.5	4711.58	5.28177	20173.9		144133	12468.8	11.5595	131664		8772.39	8772.39	1	0
	18820.3	10594.5	1.77641	8225.74		19549.1	8355.89	2.33956	11193.3		135490	10664	11.1683	124826		17518.7	10100	1.73454	7418.78
	15208.5	10861.4	1.40163	4347.15		21787.8	10282.2	2.11899	11505.6							14499.2	9657.43	1.50135	4841.73
						20715.3	7658.27	2.96576	13057.1							6637.86	6637.86	1	0
																8355.89	8355.89	1	0
						23297.6	8772.39	2.65579	14525.2							12030	9002.95	1.28331
						22100.2	11011	2.00709	11089.1
						22698.9	9891.71	2.33144	12807.2							12729.1	7496.88	1.69792	5232.19
																15930.9	11557.7	1.37838	4373.18
						21282.1	8296.39	2.78452	12985.7							23766.1	11167.2	2.12821	12598.9
																22334.4	11818	1.88987	10516.5
																8616.2	5987.09	1.43913	2629.11
																6221.37	6221.37	1	0
																14933	9041.37	1.58892
2016-08-25																13369.8	9020.68	1.42436
	24807.4	14056.6	1.76481	10750.7		13874.4	4867.76	2.85027	9006.66		142597	21371.3	6.67235	121226							71688.9	14499.2	4.94434	57189.7		36989.8	7627.03	4.84983	29362.8
	20590.4	13457.9	1.52998	7132.44		25406.1	11427.5	2.22323	13978.6		113338	26161	4.33234	87177.2							46360.9	7054.35	6.57196	39306.5		24469	7861.31	3.11258	16607.7
	8251.77	8251.77	1	0		20876.7	11974.2	1.74348	8902.54		47636.4	7132.44	6.67883	40504							37276.1	5935.03	6.2807	31341.1		33631.8	8121.62	4.14103	25510.2
	28269.5	19887.5	1.42147	8381.92		20798.6	9761.56	2.13067	11037.1		101190	18221.6	5.89451	82968.9							12677	6663.89	1.90234	6013.12		35844.4	12520.8	2.86279	23323.6
	45944.4	32694.7	1.40525	13249.7		11037.1	5752.81	1.91855	5284.26												10230.1	5388.38	1.89855	4841.73		47688.5	10698.7	4.45742	36989.8
	25588.3	16920	1.51231	8668.26		15254.1	3930.65	3.88079	11323.4												35646.6	7908.16	4.31958	27738.4		29180.5	7991.46	3.65147	21189.1
	21996	21996	1	0		15332.2	5778.84	2.65315	9553.31																	34634	9136.82	3.84585	25497.2
	12572.9	9032.69	1.39193	3540.19		25067.7	8538.11	2.93598	16529.6
	12260.5	6455.64	1.89919	5804.87		18195.5	6846.11	2.65779	11349.4
	22253.5	15861.4	1.43611	6392.01		18426.9	7653.06	2.55488	10773.9
2016-11-16
Litter A						107169	4945.86	21.6684	102223		165478	12494.8	13.2438	152983		16789.9	7470.85	2.24739	9319.03
						37979	12651	3.00206	25328		74812.6	7653.06	9.77551	67159.5		11323.4	7444.81	1.52098	3878.59
						34412.7	10985	3.1327	23427.7		119950	8824.45	13.5929	111126		7158.48	5232.19	1.36816	1926.28
						59853.5	9527.28	9.26773	50326.3		153061	20798.6	7.3592	132263		11757.3	6715.95	1.71217
											128325	12442.7	10.9928	115883
Litter B
	19236.8	13041.4	1.47505	6195.34		40321.7	8928.57	4.51603	31393.2		196663	10360.3	18.9824	186303		13900.5	13900.5	1	0
	12937.3	10047.9	1.28756	2889.42		15202	8746.36	1.7381	6455.64		23375.7	7809.25	2.99333	15566.4		4190.96	4190.96	1	0
	10880.9	6976.26	1.5597	3904.62		36130.8	8433.99	4.28395	27696.8		64972.9	8642.23	7.51807	56330.7		7653.06	7653.06	1	0
	16165.1	11193.3	1.44419	4971.89		30551.5	8702.97	3.51269	21848.5		95003.8	8937.25	9.83127	86066.6		3670.35	3670.35	1	0
	8876.51	5232.19	1.69652	3644.31												7353.71	7353.71	1
	13619.3	9298.21	1.4926	4321.12							37822.8	13614.1	2.7782	24208.7
											53285.1	7366.72	7.23322	45918.4
											45553.9	10490.4	5.00571	35063.5
											70278.9	9713.83	7.41849	60565
2016-11-25
FGF experiment	12390.7	7913.37	1.56579	4477.3		15592.5	6143.27	2.53814	9449.19		51957.5	7939.4	6.54426	44018.1		8564.14	8564.14	1	0
	7887.34	7887.34	1	0		10438.4	4373.18	2.3869	6065.18		44356.5	9032.69	4.91066	35323.8		8902.54	8902.54	1	0
	24364.8	14264.9	1.70803	10100		24885.5	14108.7	1.76384	10776.8		29857.4	11531.7	2.58916	18325.7		7314.66	3722.41	1.96503	3592.25
	10282.2	5987.09	1.71739	4295.09		18716.2	6221.37	3.00837	12494.8		31054.8	7392.75	4.2007	23662		26655.6	12911.3	2.06452	13744.3
	3279.88	3279.88	1	0		18221.6	4269.05	4.26829	13952.5		53935.9	6507.71	8.288	47428.2		44590.8	5544.56	8.04225	39046.2
	5752.81	5752.81	1	0		17570.8	7023.12	2.79311	10547.7		72001.2	8199.71	8.78095	63801.5		13614.1	5232.19	2.60199	8381.92
	10659.6	7514.23	1.33187	3145.39							47193.9	8433.99	5.88562	38759.9		4399.21	4399.21	1	0
																16291.6	7039.48	2.52483	9252.1
											184845	6273.43	29.4647	178571
											88036.2	6169.3	14.27	81866.9		15097.9	8850.48	1.70588	6247.4
											42456.3	5596.63	7.58605	36859.6		10490.4	6299.46	1.66529	4190.96
											46100.6	6299.46	7.31818	39801.1		11505.6	6820.07	1.68702	4685.55
											22933.2	5700.75	4.02283	17232.4		3982.72	3982.72	1	0
											76874.2	6007.91	12.5324	70866.3		5648.69	5648.69	1	0
																9345.06	6320.28	1.41164	3024.78
											62034	7220.95	9.209	54813.1		12818.3	6679.88	1.96823	6138.44
TGFB2 experiment	10776.8	5570.6	1.93458	5206.16																	17076.2	10178.1	1.67775	6898.17		156862	6273.43	25.0041	150588
	13952.5	8850.48	1.57647	5102.04																	29102.5	11349.4	2.56422	17753		123438	5023.95	24.5699	118414
	8329.86	5622.66	1.48148	2707.21																	17258.4	9761.56	1.768	7496.88		103863	10542.5	9.85185	93320.5
	4763.64	4763.64	1	0																	72261.6	9449.19	7.64738	62812.4		66821.1	10724.7	6.23058	56096.4
	6455.64	6455.64	1	0																	127187	6872.14	18.5076	120314		113234	6768.01	16.7308	106466
	7731.15	5570.6	1.38785	2160.56																	65753.9	7705.12	8.53378	58048.7		72209.5	7054.35	10.2362	65155.1
	7132.44	7132.44	1	0																	196142	14369	13.6504	181773		48000.8	6898.17	6.95849	41102.7
	11896.1	7496.88	1.58681	4399.21																	5258.23	5258.23	1	0		97775.5	7612.16	14.226	90163.3
	8879.76	6432.87	1.3709	2446.9																	66254.9	9367.84	6.91863	56887.1
																										75281.1	8720.32	8.63284	66560.8
	4555.39	4555.39	1	0																	104878	7236.57	14.4928	97641.6		186667	13770.3	13.5558	172897
	5023.95	5023.95	1	0																	90353	12312.6	7.33827	78040.4		35532.1	11713.9	3.03333	23818.2
	6872.14	4347.15	1.58084	2524.99																	85355.1	7314.66	11.669	78040.4		136271	5049.98	26.9845	131221
	6585.8	6585.8	1	0																	111698	6455.64	17.3024	105243		108438	9813.62	13.0516	98624.3
	10542.5	4971.89	2.12042	5570.6																	16711.8	6585.8	2.53755	10126
	8564.14	5492.5	1.55924	3071.64																	56903.4	11661.8	4.87946	45241.6
	6794.04	4581.42	1.48295	2212.62																	77649.9	8594.51	9.70326	69055.4
	4373.18	4373.18	1	0
	7366.72	3670.35	2.00709	3696.38																	71952.4	8981.18	8.31095	62971.3		103107	8712.89	13.6388	94393.8
	6741.98	4844.62	1.41673	1897.36
	7810.87	5638.75	1.39381	2172.13
TGFB2 beads 06/12/2016
	20940.6	15891.9	1.31769	5048.7																	46671.8	8519.68	5.47811	38152.1
	5134.76	5134.76	1	0																	37922.6	12793.9	2.96413	25128.8
	7056.71	7056.71	1	0																	39643.8	6052.71	6.54976	33591.1
	11044	9361.14	1.1059	1682.9																	77365.6	14400.3	5.37251	62965.3
																					33619.8	12564.4	2.6758	21055.4
																					38152.1	8003.34	4.76703	30148.8
																					53470.3	8318.88	6.42759	45151.5
																					46692.3	10093.3	4.8907	36599
TGFB2 beads 12/12/16
	11646.4	7343.57	1.58594	4302.87																	125443	18014.7	6.96338	107428		56080.8	13396.3	4.1863	42684.5
	9781.86	6024.02	1.62381	3757.84																	201030	13683.1	14.6918	187347		94405	8835.23	10.6851	85569.8
	11044	7400.94	1.49225	3643.1																	99052.1	9695.8	10.216	89356.3		54187.5	6511.68	8.32159	47675.8
	10412.9	6110.08	1.70423	4302.87																	19535	9839.23	1.98542	9695.8		16838.6	6970.65	2.41564	9867.92
	13396.3	13396.3	1	0																	63711.2	7773.85	8.19557	55937.3		23665.8	7257.51	3.26087	16408.3
	11256.3	8054.97	1.48124	3201.34																	61358.9	12191.5	5.03294	49167.5		39586.4	12908.6	3.06667	26677.8
																					32759.2	6827.22	4.79832	25932		75099.4	9294.2	8.08025	65805.2
																					86127.1	11146.5	7.41192	74980.6		51409.1	9310.59	5.71662	42098.5
Average of averages (µm2)
	BSA Areas					FGF9 beads					FGF9 + TGFB2					FGF9 plus LY2109761					TGFB2					TGFB2 beads + FGF9
	Cells plus bead	Bead	Relative area of cells	Net Area		Cells plus bead	Bead	Relative area of cells	Net Area		Cells plus bead	Bead	Relative area of cells	Net Area		Cells plus bead	Bead	Relative area of cells	Net Area		Cells plus bead	Bead	Relative Area	Net Area		Cells plus bead	Bead	Net area of cells
2016-09-01	14690.1	9162.85	1.5516	5527.21		34256.6	11050.1	3.5516	23206.5		161110	14946.9	11.2736	146163							31757.6	6052.17	5.25219	25705.4		55098.6	11089.1	4.82743	44009.4
2016-11-01						30629.6	7119.43	4.58578	23510.2		93194.7	9097.77	10.385	84096.9		6024.28	4774.8	1.33172	1249.48
2016-09-07						22256.4	8207.15	2.78261	14049.2		75949.3	5791.86	12.3461	70157.4
2016-11-08	15208.5	10861.4	1.40163	4347.15		21282.1	8296.39	2.78452	12985.7		135490	10664	11.1683	124826		13369.8	9020.68	1.42436	4349.15
2016-08-25	22253.5	15861.4	1.43611	6392.01		18426.9	7653.06	2.55488	10773.9		101190	18221.6	5.89451	82968.9							35646.6	7908.16	4.31958	27738.4		34634	9136.82	3.84585	25497.2
16/11/2016 (A)						59853.5	9527.28	9.26773	50326.3		128325	12442.7	10.9928	115883		11757.3	6715.95	1.71217	5041.3
16/11/2016 (B)	13619.3	9298.21	1.4926	4321.12		30551.5	8702.97	3.51269	21848.5		70278.9	9713.83	7.41849	60565		7353.71	7353.71	1	0
25/11/2016 (FGF)	10659.6	7514.23	1.33187	3145.39		17570.8	7023.12	2.79311	10547.7		62034	7220.95	9.209	54813.1		12818.3	6679.88	1.96823	6138.44
25/11/2016 (TGF)	7810.87	5638.75	1.39381	2172.13																	71952.4	8981.18	8.31095	62971.3		103107	8712.89	13.6388	94393.8
6/12/2016 (TGF)	11044	9361.14	1.1059	1682.9																	46692.3	10093.3	4.8907	36599
12/12/2016 (TGF)	11256.3	8054.97	1.48124	3201.34																	86127.1	11146.5	7.41192	74980.6		51409.1	9310.59	5.71662	42098.5
FGF specific Mean	13317.8	9469.12	1.39934	3848.66		29353.4	8447.44	3.97911	20906		103447	11012.4	9.83596	92434.2		10264.7	6909	1.4873	2659.98		54435.2	8836.26	6.03707	45598.9		61062.1	9562.36	7.00718	51499.7
s.d	4345.88	3010.17	0.136611	1611.24		13789.7	1336.79	2.23707	13083.3		35157.2	4081.33	2.18941	32889.9		3348.34	1524.92	0.369964	2610.97		23656.2	1971.73	1.72776	22140.6		29410.5	1048.35	4.48662	29779.9
s.e.m	1536.5	1064.26	0.0482993	569.661		4875.4	472.626	0.790925	4625.66		12430	1442.97	0.774072	11628.3		1497.42	681.966	0.165453	1167.66		10579.4	881.784	0.77268	9901.59		14705.3	524.174	2.24331	14889.9
					P VALUES	vs BSA	0.009				vs BSA		0			vs BSA	0.495
											vs FGF		0			vs FGF9	0.008
																vs FGF9 plus TGF	0
TGF specific mean	12002	8615.81	1.38684	3386.14
	3022.69	1941.31	0.169745	1574.54
	1351.79	868.179	0.0759124	704.156
Paired
2016-09-01	14690.1	9162.85	1.5516	5527.21		34256.6	11050.1	3.5516	23206.5		161110	14946.9	11.2736	146163							31757.6	6052.17	5.25219			55098.6	11089.1	4.82743
2016-11-08	15208.5	10861.4	1.40163	4347.15		21282.1	8296.39	2.78452	12985.7		135490	10664	11.1683	124826		13369.8	9020.68	1.42436
2016-08-25	22253.5	15861.4	1.43611	6392.01		18426.9	7653.06	2.55488	10773.9		101190	18221.6	5.89451	82968.9							35646.6	7908.16	4.31958			34634	9136.82	3.84585
16/11/2016 (B)	13619.3	9298.21	1.4926	4321.12		30551.5	8702.97	3.51269	21848.5		75223.9	9558.52	7.90105	65665.3		7353.71	7353.71	1
			1.47048					3.10092					9.05935	104906
BSA
FGF9
FGF9 + TGFβ2
FGF9 + LY2109761
TGFβ2
TGFβ2 + FGF9
